# Supplementary material for: A Series of Novel Pentagonal-Bipyramidal Erbium(III) Complexes with Acyclic Chelating N3O2 Schiff-Base Ligands: Synthesis, Structure, and Magnetism
Source: MDPI journal article supplement (doi:10.3390/molecules26226908), 2021-11-16

---

The following ALERTS were generated. Each ALERT has the format

**test-name\_ALERT\_alert-type\_alert-level.**

Click on the hyperlinks for more details of the test.

---

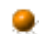

#### Alert level B

|                   |                           |       |          |   |              |
|-------------------|---------------------------|-------|----------|---|--------------|
| PLAT420_ALERT_2_B | D-H Bond Without Acceptor | O2SA  | --H2SA   | . | Please Check |
| PLAT971_ALERT_2_B | Check Calcd Resid. Dens.  | 0.89A | From Er1 |   | 2.98 eA-3    |

---

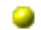

#### Alert level C

|                   |                                                  |       |           |  |            |
|-------------------|--------------------------------------------------|-------|-----------|--|------------|
| PLAT250_ALERT_2_C | Large U3/U1 Ratio for Average U(i,j) Tensor .... |       |           |  | 2.1 Note   |
| PLAT911_ALERT_3_C | Missing FCF Refl Between Thmin & STh/L=          | 0.600 |           |  | 87 Report  |
| PLAT972_ALERT_2_C | Check Calcd Resid. Dens.                         | 0.79A | From Er1  |  | -1.81 eA-3 |
| PLAT972_ALERT_2_C | Check Calcd Resid. Dens.                         | 0.72A | From Er1  |  | -1.79 eA-3 |
| PLAT972_ALERT_2_C | Check Calcd Resid. Dens.                         | 0.58A | From Er1  |  | -1.72 eA-3 |
| PLAT973_ALERT_2_C | Check Calcd Positive Resid. Density on           |       | Er1       |  | 1.07 eA-3  |
| PLAT975_ALERT_2_C | Check Calcd Resid. Dens.                         | 0.46A | From O3SA |  | 1.21 eA-3  |

---

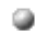

#### Alert level G

|                   |                                                  |     |                |   |              |
|-------------------|--------------------------------------------------|-----|----------------|---|--------------|
| PLAT002_ALERT_2_G | Number of Distance or Angle Restraints on AtSite |     |                |   | 15 Note      |
| PLAT003_ALERT_2_G | Number of Uiso or Uij Restrained non-H Atoms ... |     |                |   | 15 Report    |
| PLAT007_ALERT_5_G | Number of Unrefined Donor-H Atoms .....          |     |                |   | 5 Report     |
| PLAT083_ALERT_2_G | SHELXL Second Parameter in WGHT Unusually Large  |     |                |   | 6.93 Why ?   |
| PLAT154_ALERT_1_G | The s.u.'s on the Cell Angles are Equal ..(Note) |     |                |   | 0.002 Degree |
| PLAT172_ALERT_4_G | The CIF-Embedded .res File Contains DFIX Records |     |                |   | 1 Report     |
| PLAT175_ALERT_4_G | The CIF-Embedded .res File Contains SAME Records |     |                |   | 3 Report     |
| PLAT178_ALERT_4_G | The CIF-Embedded .res File Contains SIMU Records |     |                |   | 2 Report     |
| PLAT186_ALERT_4_G | The CIF-Embedded .res File Contains ISOR Records |     |                |   | 2 Report     |
| PLAT232_ALERT_2_G | Hirshfeld Test Diff (M-X)                        | Er1 | --Cl1          | . | 5.8 s.u.     |
| PLAT300_ALERT_4_G | Atom Site Occupancy of O1SA                      |     | Constrained at |   | 0.8 Check    |
| PLAT300_ALERT_4_G | Atom Site Occupancy of C1SA                      |     | Constrained at |   | 0.8 Check    |
| PLAT300_ALERT_4_G | Atom Site Occupancy of C2SA                      |     | Constrained at |   | 0.8 Check    |
| PLAT300_ALERT_4_G | Atom Site Occupancy of H1S1                      |     | Constrained at |   | 0.8 Check    |
| PLAT300_ALERT_4_G | Atom Site Occupancy of H1S2                      |     | Constrained at |   | 0.8 Check    |
| PLAT300_ALERT_4_G | Atom Site Occupancy of H2S1                      |     | Constrained at |   | 0.8 Check    |
| PLAT300_ALERT_4_G | Atom Site Occupancy of H2S2                      |     | Constrained at |   | 0.8 Check    |
| PLAT300_ALERT_4_G | Atom Site Occupancy of H2S3                      |     | Constrained at |   | 0.8 Check    |
| PLAT300_ALERT_4_G | Atom Site Occupancy of O2SA                      |     | Constrained at |   | 0.6 Check    |
| PLAT300_ALERT_4_G | Atom Site Occupancy of C3SA                      |     | Constrained at |   | 0.6 Check    |
| PLAT300_ALERT_4_G | Atom Site Occupancy of C4SA                      |     | Constrained at |   | 0.6 Check    |
| PLAT300_ALERT_4_G | Atom Site Occupancy of H2SA                      |     | Constrained at |   | 0.6 Check    |
| PLAT300_ALERT_4_G | Atom Site Occupancy of H3S1                      |     | Constrained at |   | 0.6 Check    |
| PLAT300_ALERT_4_G | Atom Site Occupancy of H3S2                      |     | Constrained at |   | 0.6 Check    |
| PLAT300_ALERT_4_G | Atom Site Occupancy of H4S1                      |     | Constrained at |   | 0.6 Check    |
| PLAT300_ALERT_4_G | Atom Site Occupancy of H4S2                      |     | Constrained at |   | 0.6 Check    |
| PLAT300_ALERT_4_G | Atom Site Occupancy of H4S3                      |     | Constrained at |   | 0.6 Check    |
| PLAT300_ALERT_4_G | Atom Site Occupancy of O1SB                      |     | Constrained at |   | 0.2 Check    |
| PLAT300_ALERT_4_G | Atom Site Occupancy of C1SB                      |     | Constrained at |   | 0.2 Check    |
| PLAT300_ALERT_4_G | Atom Site Occupancy of C2SB                      |     | Constrained at |   | 0.2 Check    |
| PLAT300_ALERT_4_G | Atom Site Occupancy of H1SB                      |     | Constrained at |   | 0.2 Check    |
| PLAT300_ALERT_4_G | Atom Site Occupancy of H1S3                      |     | Constrained at |   | 0.2 Check    |
| PLAT300_ALERT_4_G | Atom Site Occupancy of H1S4                      |     | Constrained at |   | 0.2 Check    |

|                   |                                                  |                |       |              |
|-------------------|--------------------------------------------------|----------------|-------|--------------|
| PLAT300_ALERT_4_G | Atom Site Occupancy of H2S4                      | Constrained at | 0.2   | Check        |
| PLAT300_ALERT_4_G | Atom Site Occupancy of H2S5                      | Constrained at | 0.2   | Check        |
| PLAT300_ALERT_4_G | Atom Site Occupancy of H2S6                      | Constrained at | 0.2   | Check        |
| PLAT300_ALERT_4_G | Atom Site Occupancy of O2SB                      | Constrained at | 0.2   | Check        |
| PLAT300_ALERT_4_G | Atom Site Occupancy of C3SB                      | Constrained at | 0.2   | Check        |
| PLAT300_ALERT_4_G | Atom Site Occupancy of C4SB                      | Constrained at | 0.2   | Check        |
| PLAT300_ALERT_4_G | Atom Site Occupancy of H2SB                      | Constrained at | 0.2   | Check        |
| PLAT300_ALERT_4_G | Atom Site Occupancy of H3S3                      | Constrained at | 0.2   | Check        |
| PLAT300_ALERT_4_G | Atom Site Occupancy of H3S4                      | Constrained at | 0.2   | Check        |
| PLAT300_ALERT_4_G | Atom Site Occupancy of H4S4                      | Constrained at | 0.2   | Check        |
| PLAT300_ALERT_4_G | Atom Site Occupancy of H4S5                      | Constrained at | 0.2   | Check        |
| PLAT300_ALERT_4_G | Atom Site Occupancy of H4S6                      | Constrained at | 0.2   | Check        |
| PLAT300_ALERT_4_G | Atom Site Occupancy of O3SA                      | Constrained at | 0.2   | Check        |
| PLAT300_ALERT_4_G | Atom Site Occupancy of C5SA                      | Constrained at | 0.2   | Check        |
| PLAT300_ALERT_4_G | Atom Site Occupancy of C6SA                      | Constrained at | 0.2   | Check        |
| PLAT300_ALERT_4_G | Atom Site Occupancy of H3SA                      | Constrained at | 0.2   | Check        |
| PLAT300_ALERT_4_G | Atom Site Occupancy of H5S1                      | Constrained at | 0.2   | Check        |
| PLAT300_ALERT_4_G | Atom Site Occupancy of H5S2                      | Constrained at | 0.2   | Check        |
| PLAT300_ALERT_4_G | Atom Site Occupancy of H6S1                      | Constrained at | 0.2   | Check        |
| PLAT300_ALERT_4_G | Atom Site Occupancy of H6S2                      | Constrained at | 0.2   | Check        |
| PLAT300_ALERT_4_G | Atom Site Occupancy of H6S3                      | Constrained at | 0.2   | Check        |
| PLAT302_ALERT_4_G | Anion/Solvent/Minor-Residue Disorder (Resd 2 )   |                | 100%  | Note         |
| PLAT302_ALERT_4_G | Anion/Solvent/Minor-Residue Disorder (Resd 3 )   |                | 100%  | Note         |
| PLAT302_ALERT_4_G | Anion/Solvent/Minor-Residue Disorder (Resd 4 )   |                | 100%  | Note         |
| PLAT302_ALERT_4_G | Anion/Solvent/Minor-Residue Disorder (Resd 5 )   |                | 100%  | Note         |
| PLAT302_ALERT_4_G | Anion/Solvent/Minor-Residue Disorder (Resd 6 )   |                | 100%  | Note         |
| PLAT304_ALERT_4_G | Non-Integer Number of Atoms in ..... (Resd 2 )   |                | 7.20  | Check        |
| PLAT304_ALERT_4_G | Non-Integer Number of Atoms in ..... (Resd 3 )   |                | 5.40  | Check        |
| PLAT304_ALERT_4_G | Non-Integer Number of Atoms in ..... (Resd 4 )   |                | 1.80  | Check        |
| PLAT304_ALERT_4_G | Non-Integer Number of Atoms in ..... (Resd 5 )   |                | 1.80  | Check        |
| PLAT304_ALERT_4_G | Non-Integer Number of Atoms in ..... (Resd 6 )   |                | 1.80  | Check        |
| PLAT413_ALERT_2_G | Short Inter XH3 .. XHn H20 ..H4S5 .              |                | 2.09  | Ang.         |
|                   |                                                  | x,y,z =        | 1_555 | Check        |
| PLAT413_ALERT_2_G | Short Inter XH3 .. XHn H25C ..H2S5 .             |                | 2.12  | Ang.         |
|                   |                                                  | -1+x,y,z =     | 1_455 | Check        |
| PLAT432_ALERT_2_G | Short Inter X...Y Contact O3 ..C4SB              |                | 2.61  | Ang.         |
|                   |                                                  | 1+x,1+y,z =    | 1_665 | Check        |
| PLAT432_ALERT_2_G | Short Inter X...Y Contact C1 ..C4SB              |                | 2.91  | Ang.         |
|                   |                                                  | 1+x,1+y,z =    | 1_665 | Check        |
| PLAT720_ALERT_4_G | Number of Unusual/Non-Standard Labels .....      |                | 45    | Note         |
| PLAT789_ALERT_4_G | Atoms with Negative _atom_site_disorder_group #  |                | 9     | Check        |
| PLAT860_ALERT_3_G | Number of Least-Squares Restraints .....         |                | 170   | Note         |
| PLAT910_ALERT_3_G | Missing # of FCF Reflection(s) Below Theta(Min). |                | 1     | Note         |
| PLAT912_ALERT_4_G | Missing # of FCF Reflections Above STh/L= 0.600  |                | 1704  | Note         |
| PLAT933_ALERT_2_G | Number of OMIT Records in Embedded .res File ... |                | 21    | Note         |
| PLAT941_ALERT_3_G | Average HKL Measurement Multiplicity .....       |                | 2.1   | Low          |
| PLAT965_ALERT_2_G | The SHELXL WEIGHT Optimisation has not Converged |                |       | Please Check |
| PLAT978_ALERT_2_G | Number C-C Bonds with Positive Residual Density. |                | 1     | Info         |

---

0 **ALERT level A** = Most likely a serious problem - resolve or explain  
 2 **ALERT level B** = A potentially serious problem, consider carefully  
 7 **ALERT level C** = Check. Ensure it is not caused by an omission or oversight  
 78 **ALERT level G** = General information/check it is not something unexpected

1 ALERT type 1 CIF construction/syntax error, inconsistent or missing data

19 ALERT type 2 Indicator that the structure model may be wrong or deficient  
4 ALERT type 3 Indicator that the structure quality may be low  
62 ALERT type 4 Improvement, methodology, query or suggestion  
1 ALERT type 5 Informative message, check

---

---

It is advisable to attempt to resolve as many as possible of the alerts in all categories. Often the minor alerts point to easily fixed oversights, errors and omissions in your CIF or refinement strategy, so attention to these fine details can be worthwhile. In order to resolve some of the more serious problems it may be necessary to carry out additional measurements or structure refinements. However, the purpose of your study may justify the reported deviations and the more serious of these should normally be commented upon in the discussion or experimental section of a paper or in the "special\_details" fields of the CIF. checkCIF was carefully designed to identify outliers and unusual parameters, but every test has its limitations and alerts that are not important in a particular case may appear. Conversely, the absence of alerts does not guarantee there are no aspects of the results needing attention. It is up to the individual to critically assess their own results and, if necessary, seek expert advice.

### **Publication of your CIF in IUCr journals**

A basic structural check has been run on your CIF. These basic checks will be run on all CIFs submitted for publication in IUCr journals (*Acta Crystallographica*, *Journal of Applied Crystallography*, *Journal of Synchrotron Radiation*); however, if you intend to submit to *Acta Crystallographica Section C* or *E* or *IUCrData*, you should make sure that full publication checks are run on the final version of your CIF prior to submission.

### **Publication of your CIF in other journals**

Please refer to the *Notes for Authors* of the relevant journal for any special instructions relating to CIF submission.

---

**PLATON version of 13/07/2021; check.def file version of 13/07/2021**

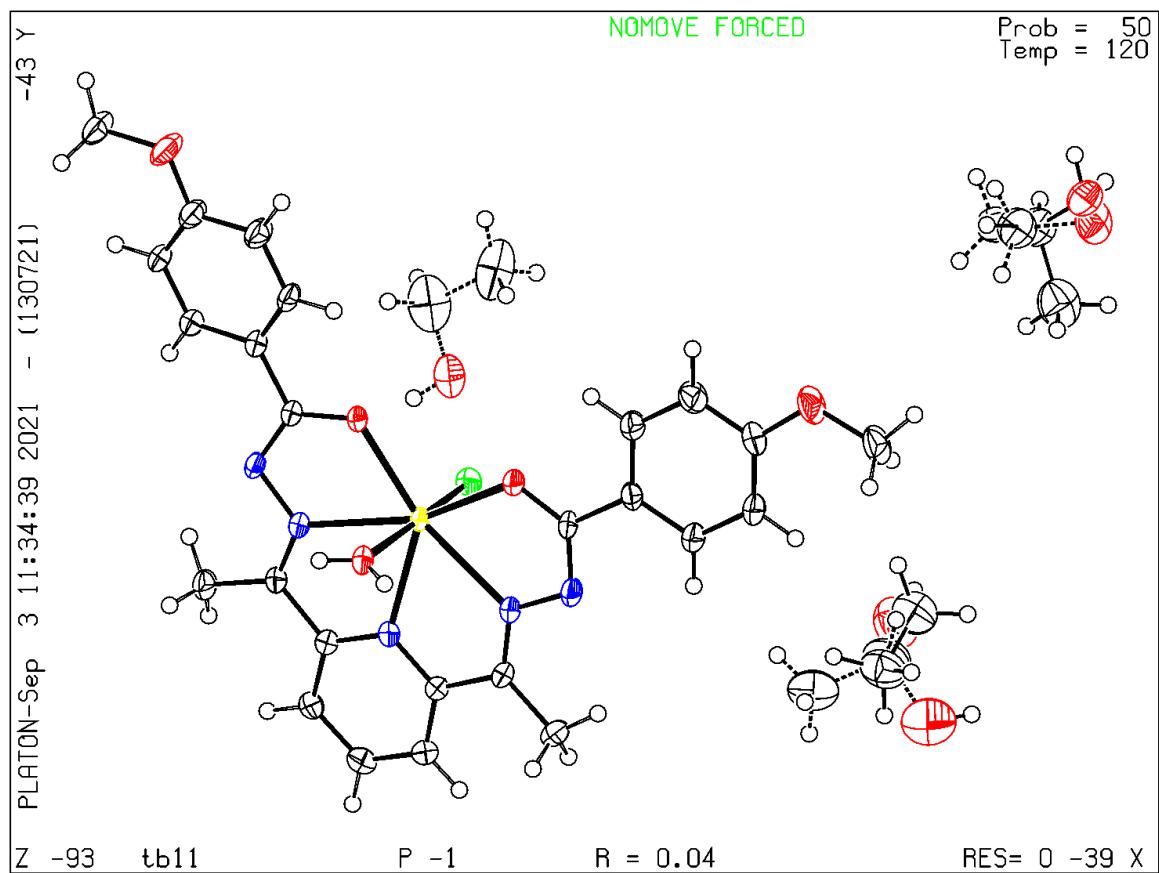

Supplement: s1 [file s1]
