# Supplementary material for: A Series of Novel Pentagonal-Bipyramidal Erbium(III) Complexes with Acyclic Chelating N3O2 Schiff-Base Ligands: Synthesis, Structure, and Magnetism
Source: MDPI journal article supplement (doi:10.3390/molecules26226908), 2021-11-16
Supplement: s1 [file s1]

## checkCIF/PLATON report

You have not supplied any structure factors. As a result the full set of tests cannot be run.

THIS REPORT IS FOR GUIDANCE ONLY. IF USED AS PART OF A REVIEW PROCEDURE FOR PUBLICATION, IT SHOULD NOT REPLACE THE EXPERTISE OF AN EXPERIENCED CRYSTALLOGRAPHIC REFEREE.

No syntax errors found.      CIF dictionary      Interpreting this report

### Datablock: 6

---

|                 |                                             |                                               |
|-----------------|---------------------------------------------|-----------------------------------------------|
| Bond precision: | C-C = 0.0080 A                              | Wavelength=0.71073                            |
| Cell:           | a=18.7925 (12)<br>alpha=90                  | b=14.9064 (8)<br>beta=90                      |
| Temperature:    | c=11.1790 (7)<br>gamma=90                   |                                               |
|                 | 150 K                                       |                                               |
|                 | Calculated                                  | Reported                                      |
| Volume          | 3131.6 (3)                                  | 3131.6 (3)                                    |
| Space group     | C m c 21                                    | C m c 21                                      |
| Hall group      | C 2c -2                                     | C 2c -2                                       |
| Moiety formula  | C23 H19 Cl2 Er0.05 N5 O4<br>Y0.96, C6 H16 N | C23 H19 Cl2 Er0.045 N5 O4<br>Y0.955, C6 H16 N |
| Sum formula     | C29 H35 Cl2 Er0.05 N6 O4<br>Y0.96           | C29 H35 Cl2 Er0.045 N6 O4<br>Y0.955           |
| Mr              | 694.97                                      | 694.97                                        |
| Dx, g cm-3      | 1.474                                       | 1.474                                         |
| Z               | 4                                           | 4                                             |
| Mu (mm-1)       | 2.114                                       | 2.117                                         |
| F000            | 1429.2                                      | 1429.0                                        |
| F000'           | 1420.13                                     |                                               |
| h, k, lmax      | 23, 18, 13                                  | 23, 18, 13                                    |
| Nref            | 3275 [ 1727]                                | 2472                                          |
| Tmin, Tmax      | 0.776, 0.809                                | 0.727, 1.000                                  |
| Tmin'           | 0.530                                       |                                               |

Correction method= # Reported T Limits: Tmin=0.727 Tmax=1.000

AbsCorr = MULTII-SCAN

Data completeness= 1.43/0.75

Theta (max)= 26.309

R(reflections)= 0.0343( 2307)

wR2(reflections)=  
0.0730( 2472)

S = 1.059

Npar= 212

The following ALERTS were generated. Each ALERT has the format

**test-name\_ALERT\_alert-type\_alert-level.**

Click on the hyperlinks for more details of the test.

---

 **Alert level A**

PLAT410\_ALERT\_2\_A Short Intra H...H Contact H2C1 ..H2C1 . 1.61 Ang.  
-2-x,y,z = 4\_355 Check

---

 **Alert level B**

PLAT214\_ALERT\_2\_B Atom C2C (Anion/Solvent) ADP max/min Ratio 5.6 prolat

---

 **Alert level C**

PLAT041\_ALERT\_1\_C Calc. and Reported SumFormula Strings Differ Please Check  
PLAT077\_ALERT\_4\_C Unitcell Contains Non-integer Number of Atoms .. Please Check  
PLAT221\_ALERT\_2\_C Solv./Anion Resd 2 C Ueq(max)/Ueq(min) Range 5.1 Ratio  
PLAT223\_ALERT\_4\_C Solv./Anion Resd 2 H Ueq(max)/Ueq(min) Range 10.0 Ratio  
PLAT243\_ALERT\_4\_C High 'Solvent' Ueq as Compared to Neighbors of C2C Check  
PLAT244\_ALERT\_4\_C Low 'Solvent' Ueq as Compared to Neighbors of N1C Check  
PLAT245\_ALERT\_2\_C U(iso) H1N Smaller than U(eq) N1C by 0.021 Ang\*\*2  
PLAT360\_ALERT\_2\_C Short C(sp3)-C(sp3) Bond C1C - C2C . 1.34 Ang.  
PLAT420\_ALERT\_2\_C D-H Bond Without Acceptor N1C --H1N . Please Check  
PLAT790\_ALERT\_4\_C Centre of Gravity not Within Unit Cell: Resd. # 1 Note  
C23 H19 C12 Er0.05 N5 O4 Y0.96

---

 **Alert level G**

PLAT007\_ALERT\_5\_G Number of Unrefined Donor-H Atoms ..... 1 Report  
PLAT042\_ALERT\_1\_G Calc. and Reported Moiety Formula Strings Differ Please Check  
PLAT068\_ALERT\_1\_G Reported F000 Differs from Calcd (or Missing)... Please Check  
PLAT168\_ALERT\_4\_G The CIF-Embedded .res File Contains EXYZ Records 1 Report  
PLAT171\_ALERT\_4\_G The CIF-Embedded .res File Contains EADP Records 1 Report  
PLAT300\_ALERT\_4\_G Atom Site Occupancy of Er1 Constrained at 0.045 Check  
PLAT300\_ALERT\_4\_G Atom Site Occupancy of Y1 Constrained at 0.955 Check  
PLAT300\_ALERT\_4\_G Atom Site Occupancy of C3C Constrained at 0.5 Check  
PLAT300\_ALERT\_4\_G Atom Site Occupancy of C4C Constrained at 0.5 Check  
PLAT300\_ALERT\_4\_G Atom Site Occupancy of H4C1 Constrained at 0.5 Check  
PLAT300\_ALERT\_4\_G Atom Site Occupancy of H4C2 Constrained at 0.5 Check  
PLAT300\_ALERT\_4\_G Atom Site Occupancy of H4C3 Constrained at 0.5 Check  
PLAT300\_ALERT\_4\_G Atom Site Occupancy of H3C1 Constrained at 0.5 Check  
PLAT300\_ALERT\_4\_G Atom Site Occupancy of H3C2 Constrained at 0.5 Check  
PLAT301\_ALERT\_3\_G Main Residue Disorder .....(Resd 1 ) 6% Note  
PLAT302\_ALERT\_4\_G Anion/Solvent/Minor-Residue Disorder (Resd 2 ) 29% Note  
PLAT344\_ALERT\_2\_G Unusual sp3 Angle Range in Solvent/Ion for C2C Check  
PLAT380\_ALERT\_4\_G Incorrectly? Oriented X(sp2)-Methyl Moiety ..... C15 Check  
PLAT410\_ALERT\_2\_G Short Intra H...H Contact H3C1 ..H2C2 . 1.82 Ang.  
x,y,z = 1\_555 Check  
PLAT410\_ALERT\_2\_G Short Intra H...H Contact H3C2 ..H2C2 . 1.80 Ang.

|                   |                                                  |       |              |
|-------------------|--------------------------------------------------|-------|--------------|
|                   | x,y,z =                                          | 1_555 | Check        |
| PLAT720_ALERT_4_G | Number of Unusual/Non-Standard Labels .....      | 11    | Note         |
| PLAT789_ALERT_4_G | Atoms with Negative _atom_site_disorder_group #  | 7     | Check        |
| PLAT790_ALERT_4_G | Centre of Gravity not Within Unit Cell: Resd. #  | 2     | Note         |
|                   | C6 H16 N                                         |       |              |
| PLAT802_ALERT_4_G | CIF Input Record(s) with more than 80 Characters | 1     | Info         |
| PLAT941_ALERT_3_G | Average HKL Measurement Multiplicity .....       | 2.5   | Low          |
| PLAT965_ALERT_2_G | The SHELXL WEIGHT Optimisation has not Converged |       | Please Check |

---

1 **ALERT level A** = Most likely a serious problem - resolve or explain  
1 **ALERT level B** = A potentially serious problem, consider carefully  
10 **ALERT level C** = Check. Ensure it is not caused by an omission or oversight  
26 **ALERT level G** = General information/check it is not something unexpected

3 ALERT type 1 CIF construction/syntax error, inconsistent or missing data  
10 ALERT type 2 Indicator that the structure model may be wrong or deficient  
2 ALERT type 3 Indicator that the structure quality may be low  
22 ALERT type 4 Improvement, methodology, query or suggestion  
1 ALERT type 5 Informative message, check

---

It is advisable to attempt to resolve as many as possible of the alerts in all categories. Often the minor alerts point to easily fixed oversights, errors and omissions in your CIF or refinement strategy, so attention to these fine details can be worthwhile. In order to resolve some of the more serious problems it may be necessary to carry out additional measurements or structure refinements. However, the purpose of your study may justify the reported deviations and the more serious of these should normally be commented upon in the discussion or experimental section of a paper or in the "special\_details" fields of the CIF. checkCIF was carefully designed to identify outliers and unusual parameters, but every test has its limitations and alerts that are not important in a particular case may appear. Conversely, the absence of alerts does not guarantee there are no aspects of the results needing attention. It is up to the individual to critically assess their own results and, if necessary, seek expert advice.

### Publication of your CIF in IUCr journals

A basic structural check has been run on your CIF. These basic checks will be run on all CIFs submitted for publication in IUCr journals (*Acta Crystallographica*, *Journal of Applied Crystallography*, *Journal of Synchrotron Radiation*); however, if you intend to submit to *Acta Crystallographica Section C* or *E* or *IUCrData*, you should make sure that full publication checks are run on the final version of your CIF prior to submission.

### Publication of your CIF in other journals

Please refer to the *Notes for Authors* of the relevant journal for any special instructions relating to CIF submission.
