# Supplementary material for: A Series of Novel Pentagonal-Bipyramidal Erbium(III) Complexes with Acyclic Chelating N3O2 Schiff-Base Ligands: Synthesis, Structure, and Magnetism
Source: MDPI journal article supplement (doi:10.3390/molecules26226908), 2021-11-16
Supplement: s1 [file s1]

## checkCIF/PLATON report

You have not supplied any structure factors. As a result the full set of tests cannot be run.

THIS REPORT IS FOR GUIDANCE ONLY. IF USED AS PART OF A REVIEW PROCEDURE FOR PUBLICATION, IT SHOULD NOT REPLACE THE EXPERTISE OF AN EXPERIENCED CRYSTALLOGRAPHIC REFEREE.

No syntax errors found.      CIF dictionary      Interpreting this report

### Datablock: Er

---

|                                         |                                   |                                     |
|-----------------------------------------|-----------------------------------|-------------------------------------|
| Bond precision:                         | C-C = 0.0099 A                    | Wavelength=0.71073                  |
| Cell:                                   | a=18.7290 (5)                     | b=14.8702 (4)      c=11.1918 (4)    |
|                                         | alpha=90                          | beta=90      gamma=90               |
| Temperature:                            | 100 K                             |                                     |
|                                         | Calculated                        | Reported                            |
| Volume                                  | 3116.96 (16)                      | 3116.95 (16)                        |
| Space group                             | C m c 21                          | C m c 21                            |
| Hall group                              | C 2c -2                           | C 2c -2                             |
| Moiety formula                          | C23 H19 Cl2 Er N5 O4, C6<br>H16 N | C23 H19 Cl2 Er N5 O4, C6<br>H16 N   |
| Sum formula                             | C29 H35 Cl2 Er N6 O4              | C29 H35 Cl2 Er N6 O4                |
| Mr                                      | 769.79                            | 769.79                              |
| Dx, g cm-3                              | 1.640                             | 1.640                               |
| Z                                       | 4                                 | 4                                   |
| Mu (mm-1)                               | 2.908                             | 2.908                               |
| F000                                    | 1540.0                            | 1540.0                              |
| F000'                                   | 1540.63                           |                                     |
| h, k, lmax                              | 25, 20, 15                        | 25, 20, 15                          |
| Nref                                    | 4312 [ 2264]                      | 3427                                |
| Tmin, Tmax                              | 0.712, 0.748                      | 0.959, 1.000                        |
| Tmin'                                   | 0.479                             |                                     |
| Correction method= # Reported T Limits: | Tmin=0.959 Tmax=1.000             |                                     |
| AbsCorr = MULTI-SCAN                    |                                   |                                     |
| Data completeness=                      | 1.51/0.79                         | Theta(max)= 29.065                  |
| R(reflections)=                         | 0.0331 ( 3085)                    | wR2(reflections)=<br>0.0551 ( 3427) |
| S =                                     | 0.960                             | Npar= 212                           |

---

The following ALERTS were generated. Each ALERT has the format

**test-name\_ALERT\_alert-type\_alert-level.**

Click on the hyperlinks for more details of the test.

---

 **Alert level A**

PLAT214\_ALERT\_2\_A Atom C2C (Anion/Solvent) ADP max/min Ratio 6.5 prolat  
PLAT410\_ALERT\_2\_A Short Intra H...H Contact H2C1 ..H2C1 . 1.59 Ang.  
-2-x,y,z = 4\_355 Check

---

 **Alert level B**

PLAT360\_ALERT\_2\_B Short C(sp3)-C(sp3) Bond C1C - C2C . 1.32 Ang.

---

 **Alert level C**

PLAT221\_ALERT\_2\_C Solv./Anion Resd 2 C Ueq(max)/Ueq(min) Range 6.6 Ratio  
PLAT223\_ALERT\_4\_C Solv./Anion Resd 2 H Ueq(max)/Ueq(min) Range 9.5 Ratio  
PLAT243\_ALERT\_4\_C High 'Solvent' Ueq as Compared to Neighbors of C2C Check  
PLAT244\_ALERT\_4\_C Low 'Solvent' Ueq as Compared to Neighbors of N1C Check  
PLAT342\_ALERT\_3\_C Low Bond Precision on C-C Bonds ..... 0.00992 Ang.  
PLAT790\_ALERT\_4\_C Centre of Gravity not Within Unit Cell: Resd. # 1 Note  
C23 H19 C12 Er N5 O4

---

 **Alert level G**

PLAT007\_ALERT\_5\_G Number of Unrefined Donor-H Atoms ..... 1 Report  
PLAT300\_ALERT\_4\_G Atom Site Occupancy of C3C Constrained at 0.5 Check  
PLAT300\_ALERT\_4\_G Atom Site Occupancy of C4C Constrained at 0.5 Check  
PLAT300\_ALERT\_4\_G Atom Site Occupancy of H4C1 Constrained at 0.5 Check  
PLAT300\_ALERT\_4\_G Atom Site Occupancy of H4C2 Constrained at 0.5 Check  
PLAT300\_ALERT\_4\_G Atom Site Occupancy of H4C3 Constrained at 0.5 Check  
PLAT300\_ALERT\_4\_G Atom Site Occupancy of H3C1 Constrained at 0.5 Check  
PLAT300\_ALERT\_4\_G Atom Site Occupancy of H3C2 Constrained at 0.5 Check  
PLAT302\_ALERT\_4\_G Anion/Solvent/Minor-Residue Disorder (Resd 2 ) 29% Note  
PLAT344\_ALERT\_2\_G Unusual sp3 Angle Range in Solvent/Ion for C2C Check  
PLAT380\_ALERT\_4\_G Incorrectly? Oriented X(sp2)-Methyl Moiety ..... C15 Check  
PLAT410\_ALERT\_2\_G Short Intra H...H Contact H3C1 ..H2C2 . 1.83 Ang.  
x,y,z = 1\_555 Check  
PLAT410\_ALERT\_2\_G Short Intra H...H Contact H3C2 ..H2C2 . 1.77 Ang.  
x,y,z = 1\_555 Check  
PLAT720\_ALERT\_4\_G Number of Unusual/Non-Standard Labels ..... 11 Note  
PLAT789\_ALERT\_4\_G Atoms with Negative \_atom\_site\_disorder\_group # 7 Check  
PLAT790\_ALERT\_4\_G Centre of Gravity not Within Unit Cell: Resd. # 2 Note  
C6 H16 N  
PLAT802\_ALERT\_4\_G CIF Input Record(s) with more than 80 Characters 1 Info  
PLAT941\_ALERT\_3\_G Average HKL Measurement Multiplicity ..... 2.3 Low

---

2 **ALERT level A** = Most likely a serious problem - resolve or explain

1 **ALERT level B** = A potentially serious problem, consider carefully

6 **ALERT level C** = Check. Ensure it is not caused by an omission or oversight

18 **ALERT level G** = General information/check it is not something unexpected

0 ALERT type 1 CIF construction/syntax error, inconsistent or missing data

7 ALERT type 2 Indicator that the structure model may be wrong or deficient  
2 ALERT type 3 Indicator that the structure quality may be low  
17 ALERT type 4 Improvement, methodology, query or suggestion  
1 ALERT type 5 Informative message, check

---

It is advisable to attempt to resolve as many as possible of the alerts in all categories. Often the minor alerts point to easily fixed oversights, errors and omissions in your CIF or refinement strategy, so attention to these fine details can be worthwhile. In order to resolve some of the more serious problems it may be necessary to carry out additional measurements or structure refinements. However, the purpose of your study may justify the reported deviations and the more serious of these should normally be commented upon in the discussion or experimental section of a paper or in the "special\_details" fields of the CIF. checkCIF was carefully designed to identify outliers and unusual parameters, but every test has its limitations and alerts that are not important in a particular case may appear. Conversely, the absence of alerts does not guarantee there are no aspects of the results needing attention. It is up to the individual to critically assess their own results and, if necessary, seek expert advice.

### **Publication of your CIF in IUCr journals**

A basic structural check has been run on your CIF. These basic checks will be run on all CIFs submitted for publication in IUCr journals (*Acta Crystallographica*, *Journal of Applied Crystallography*, *Journal of Synchrotron Radiation*); however, if you intend to submit to *Acta Crystallographica Section C* or *E* or *IUCrData*, you should make sure that full publication checks are run on the final version of your CIF prior to submission.

### **Publication of your CIF in other journals**

Please refer to the *Notes for Authors* of the relevant journal for any special instructions relating to CIF submission.

---

**PLATON version of 13/07/2021; check.def file version of 13/07/2021**
