# Supplementary material for: A Series of Novel Pentagonal-Bipyramidal Erbium(III) Complexes with Acyclic Chelating N3O2 Schiff-Base Ligands: Synthesis, Structure, and Magnetism
Source: Molecules. 2021 Nov 16;26(22):6908. doi: 10.3390/molecules26226908 (PMC8622354; doi:10.3390/molecules26226908)
Supplement: Supplementary file 1 [file molecules-26-06908-s001.zip]

Archive with 11 entries (11 files):
- Supplementary files/2.cif
- Supplementary files/2_checkcif.pdf
- Supplementary files/3.cif
- Supplementary files/3_checkcif.pdf
- Supplementary files/4.cif
- Supplementary files/4_checkcif.pdf
- Supplementary files/5.cif
- Supplementary files/5_checkcif.pdf
- Supplementary files/6.cif
- Supplementary files/6_checkcif.pdf
- Supplementary files/ESI Molecules corrected.pdf
