# Supplementary material for: A Series of Novel Pentagonal-Bipyramidal Erbium(III) Complexes with Acyclic Chelating N3O2 Schiff-Base Ligands: Synthesis, Structure, and Magnetism
Source: Molecules. 2021 Nov 16;26(22):6908. doi: 10.3390/molecules26226908 (PMC8622354; doi:10.3390/molecules26226908)
Supplement: Supplementary file 1 [file molecules-26-06908-s001.zip › Supplementary files/2.cif]

 
data_tb11
 
_audit_creation_method            'SHELXL-2016/6'
_shelx_SHELXL_version_number      '2016/6'
_chemical_name_systematic         ?
_chemical_name_common             ?
_chemical_melting_point           ?
_chemical_formula_moiety          
 'C25 H25 Cl Er N5 O5, 2(C2 H6 O)'
_chemical_formula_sum
 'C29 H37 Cl Er N5 O7' 
_chemical_formula_weight          770.34

loop_
 _atom_type_symbol
 _atom_type_description
 _atom_type_scat_dispersion_real
 _atom_type_scat_dispersion_imag
 _atom_type_scat_source
 'C'  'C'   0.0033   0.0016
 'International Tables Vol C Tables 4.2.6.8 and 6.1.1.4'
 'H'  'H'   0.0000   0.0000
 'International Tables Vol C Tables 4.2.6.8 and 6.1.1.4'
 'Cl'  'Cl'   0.1484   0.1585
 'International Tables Vol C Tables 4.2.6.8 and 6.1.1.4'
 'Er'  'Er'  -0.2586   4.9576
 'International Tables Vol C Tables 4.2.6.8 and 6.1.1.4'
 'N'  'N'   0.0061   0.0033
 'International Tables Vol C Tables 4.2.6.8 and 6.1.1.4'
 'O'  'O'   0.0106   0.0060
 'International Tables Vol C Tables 4.2.6.8 and 6.1.1.4'
 
_space_group_crystal_system       triclinic
_space_group_IT_number            2
_space_group_name_H-M_alt         'P -1'
_space_group_name_Hall            '-P 1'
 
_shelx_space_group_comment
;
The symmetry employed for this shelxl refinement is uniquely defined
by the following loop, which should always be used as a source of
symmetry information in preference to the above space-group names.
They are only intended as comments.
;
 
loop_
 _space_group_symop_operation_xyz
 'x, y, z'
 '-x, -y, -z'
 
_cell_length_a                    8.3532(2)
_cell_length_b                    13.8859(2)
_cell_length_c                    14.6874(4)
_cell_angle_alpha                 88.386(2)
_cell_angle_beta                  80.033(2)
_cell_angle_gamma                 83.244(2)
_cell_volume                      1666.20(7)
_cell_formula_units_Z             2
_cell_measurement_temperature     120(1)
_cell_measurement_reflns_used     5501
_cell_measurement_theta_min       1.4930
_cell_measurement_theta_max       30.7440
 
_exptl_crystal_description        prism
_exptl_crystal_colour             yellow
_exptl_crystal_density_meas       ?
_exptl_crystal_density_method     ?
_exptl_crystal_density_diffrn     1.535          
_exptl_crystal_F_000              774
_exptl_transmission_factor_min    ?
_exptl_transmission_factor_max    ?
_exptl_crystal_size_max           0.240
_exptl_crystal_size_mid           0.210
_exptl_crystal_size_min           0.120
_exptl_absorpt_coefficient_mu     2.648
_shelx_estimated_absorpt_T_min    0.569
_shelx_estimated_absorpt_T_max    0.742
_exptl_absorpt_correction_type    multi-scan
_exptl_absorpt_correction_T_min   0.88946
_exptl_absorpt_correction_T_max   1.00000
_exptl_absorpt_process_details
;
CrysAlisPro 1.171.38.46 (Rigaku Oxford Diffraction, 2015)
Empirical absorption correction using spherical harmonics,
 implemented in SCALE3 ABSPACK scaling algorithm.
;
_oxdiff_exptl_absorpt_empirical_full_min           0.912
_oxdiff_exptl_absorpt_empirical_full_max           1.160
_oxdiff_exptl_absorpt_empirical_details
;
Empirical correction (ABSPACK) includes:
- Absorption correction using spherical harmonics
- Frame scaling
;
_diffrn_ambient_temperature       120(1)
_diffrn_ambient_environment       N~2~
_diffrn_source                    'fine-focus sealed X-ray tube'
_diffrn_source_type               'Enhance (Mo) X-ray Source'
_diffrn_radiation_probe           x-ray
_diffrn_radiation_type            'Mo K\a'
_diffrn_radiation_wavelength      0.71073
_diffrn_radiation_monochromator   graphite
_diffrn_measurement_device        'four-circle diffractometer'
_diffrn_measurement_device_type   'Xcalibur, AtlasS2, Gemini'
_diffrn_detector                  'CCD plate'
_diffrn_detector_type             AtlasS2
_diffrn_detector_area_resol_mean  10.4566
_diffrn_reflns_number             18540
_diffrn_reflns_av_unetI/netI      0.0486
_diffrn_reflns_av_R_equivalents   0.0324
_diffrn_reflns_limit_h_min        -11
_diffrn_reflns_limit_h_max        12
_diffrn_reflns_limit_k_min        -19
_diffrn_reflns_limit_k_max        18
_diffrn_reflns_limit_l_min        -20
_diffrn_reflns_limit_l_max        21
_diffrn_reflns_theta_min          1.477
_diffrn_reflns_theta_max          31.227
_diffrn_reflns_theta_full         26.000
_diffrn_measured_fraction_theta_max   0.833
_diffrn_measured_fraction_theta_full  0.983
_diffrn_reflns_Laue_measured_fraction_max    0.833
_diffrn_reflns_Laue_measured_fraction_full   0.983
_diffrn_reflns_point_group_measured_fraction_max   0.833
_diffrn_reflns_point_group_measured_fraction_full  0.983
_reflns_number_total              9018
_reflns_number_gt                 7803
_reflns_threshold_expression      'I > 2\s(I)'
_reflns_Friedel_coverage          0.000
_reflns_Friedel_fraction_max      .
_reflns_Friedel_fraction_full     .
 
_reflns_special_details
;
 Reflections were merged by SHELXL according to the crystal
 class for the calculation of statistics and refinement.
 
 _reflns_Friedel_fraction is defined as the number of unique
 Friedel pairs measured divided by the number that would be
 possible theoretically, ignoring centric projections and
 systematic absences.
;
 
_computing_data_collection       'CrysAlisPro 1.171.38.46 (Rigaku OD, 2015)'
_computing_cell_refinement       'CrysAlisPro 1.171.38.46 (Rigaku OD, 2015)'
_computing_data_reduction        'CrysAlisPro 1.171.38.46 (Rigaku OD, 2015)'
_computing_structure_solution    'SHELXS-97 (Sheldrick, 2008)'
_computing_structure_refinement  'SHELXL-2016/6 (Sheldrick, 2016)'
_computing_molecular_graphics    'DIAMOND 3.1 (Crystal Impact GbR 2005)'
_computing_publication_material  'WinGX publication routines (Farrugia, 1999)'

_refine_ls_structure_factor_coef  Fsqd
_refine_ls_matrix_type            full
_refine_ls_weighting_scheme       calc
_refine_ls_weighting_details
'w=1/[\s^2^(Fo^2^)+(0.0472P)^2^+6.9294P] where P=(Fo^2^+2Fc^2^)/3'
_atom_sites_solution_primary      direct
_atom_sites_solution_secondary    difmap
_atom_sites_solution_hydrogens    mixed
_refine_ls_hydrogen_treatment     mixed
_refine_ls_extinction_method      none
_refine_ls_extinction_coef        .
_refine_ls_number_reflns          9018
_refine_ls_number_parameters      484
_refine_ls_number_restraints      170
_refine_ls_R_factor_all           0.0559
_refine_ls_R_factor_gt            0.0447
_refine_ls_wR_factor_ref          0.1120
_refine_ls_wR_factor_gt           0.1028
_refine_ls_goodness_of_fit_ref    1.003
_refine_ls_restrained_S_all       0.999
_refine_ls_shift/su_max           0.002
_refine_ls_shift/su_mean          0.000
 
loop_
 _atom_site_label
 _atom_site_type_symbol
 _atom_site_fract_x
 _atom_site_fract_y
 _atom_site_fract_z
 _atom_site_U_iso_or_equiv
 _atom_site_adp_type
 _atom_site_occupancy
 _atom_site_site_symmetry_order  
 _atom_site_calc_flag
 _atom_site_refinement_flags_posn
 _atom_site_refinement_flags_adp
 _atom_site_refinement_flags_occupancy
 _atom_site_disorder_assembly
 _atom_site_disorder_group
Er1 Er 0.54290(2) 0.77488(2) 0.11467(2) 0.02466(7) Uani 1 1 d . . . . .
Cl1 Cl 0.82085(14) 0.66368(8) 0.08672(8) 0.0296(2) Uani 1 1 d . . . . .
N1 N 0.7078(5) 0.9570(2) -0.0031(3) 0.0241(7) Uani 1 1 d . . . . .
N2 N 0.6383(4) 0.8737(3) -0.0183(3) 0.0243(7) Uani 1 1 d . . . . .
N3 N 0.4895(5) 0.7186(3) -0.0292(3) 0.0249(7) Uani 1 1 d . . . . .
N4 N 0.3840(4) 0.6399(3) 0.1310(3) 0.0238(7) Uani 1 1 d . . . . .
N5 N 0.3316(5) 0.6048(3) 0.2184(3) 0.0274(8) Uani 1 1 d . . . . .
O1 O 0.6578(5) 0.9023(2) 0.1488(2) 0.0339(8) Uani 1 1 d . . . . .
O2 O 0.4599(4) 0.7313(2) 0.2620(2) 0.0286(7) Uani 1 1 d . . . . .
O3 O 0.9343(5) 1.2811(3) 0.2357(3) 0.0441(9) Uani 1 1 d . . . . .
O4 O 0.2668(5) 0.5332(3) 0.6521(2) 0.0434(9) Uani 1 1 d . . . . .
O5 O 0.3092(4) 0.8772(2) 0.1150(2) 0.0312(7) Uani 1 1 d D . . . .
H5A H 0.220(4) 0.860(4) 0.137(4) 0.047 Uiso 1 1 d D U . . .
H5B H 0.302(8) 0.928(2) 0.086(4) 0.047 Uiso 1 1 d D U . . .
C1 C 1.0166(7) 1.3514(4) 0.1798(4) 0.0397(12) Uani 1 1 d . . . . .
H1A H 1.117350 1.319733 0.143105 0.060 Uiso 1 1 calc R U . . .
H1B H 1.043889 1.400589 0.219319 0.060 Uiso 1 1 calc R U . . .
H1C H 0.945485 1.382395 0.138269 0.060 Uiso 1 1 calc R U . . .
C2 C 0.7464(6) 1.0647(3) 0.2151(3) 0.0307(10) Uani 1 1 d . . . . .
H2 H 0.686005 1.021858 0.255153 0.037 Uiso 1 1 calc R U . . .
C3 C 0.7993(7) 1.1425(4) 0.2518(3) 0.0359(11) Uani 1 1 d . . . . .
H3 H 0.775748 1.153602 0.316493 0.043 Uiso 1 1 calc R U . . .
C4 C 0.8884(6) 1.2055(3) 0.1927(3) 0.0319(10) Uani 1 1 d . . . . .
C5 C 0.9261(6) 1.1883(3) 0.0986(3) 0.0283(9) Uani 1 1 d . . . . .
H5 H 0.988383 1.230521 0.058876 0.034 Uiso 1 1 calc R U . . .
C6 C 0.8722(5) 1.1090(3) 0.0630(3) 0.0259(9) Uani 1 1 d . . . . .
H6 H 0.898935 1.096639 -0.001450 0.031 Uiso 1 1 calc R U . . .
C7 C 0.7793(5) 1.0473(3) 0.1206(3) 0.0255(9) Uani 1 1 d . . . . .
C8 C 0.7124(5) 0.9634(3) 0.0864(3) 0.0247(8) Uani 1 1 d . . . . .
C9 C 0.7030(6) 0.9021(3) -0.1868(3) 0.0324(10) Uani 1 1 d . . . . .
H9A H 0.617690 0.950238 -0.204128 0.049 Uiso 1 1 calc R U . . .
H9B H 0.741510 0.856111 -0.237516 0.049 Uiso 1 1 calc R U . . .
H9C H 0.794625 0.934881 -0.174570 0.049 Uiso 1 1 calc R U . . .
C10 C 0.6345(5) 0.8487(3) -0.1019(3) 0.0240(8) Uani 1 1 d . . . . .
C11 C 0.5510(6) 0.7606(3) -0.1095(3) 0.0258(9) Uani 1 1 d . . . . .
C12 C 0.5376(6) 0.7224(3) -0.1941(3) 0.0311(10) Uani 1 1 d . . . . .
H12 H 0.581546 0.752371 -0.250400 0.037 Uiso 1 1 calc R U . . .
C13 C 0.4589(6) 0.6396(4) -0.1948(3) 0.0334(10) Uani 1 1 d . . . . .
H13 H 0.450476 0.611718 -0.251914 0.040 Uiso 1 1 calc R U . . .
C14 C 0.3931(6) 0.5980(3) -0.1126(3) 0.0296(9) Uani 1 1 d . . . . .
H14 H 0.338526 0.541744 -0.112322 0.036 Uiso 1 1 calc R U . . .
C15 C 0.4081(5) 0.6400(3) -0.0299(3) 0.0246(8) Uani 1 1 d . . . . .
C16 C 0.3414(5) 0.6007(3) 0.0615(3) 0.0255(9) Uani 1 1 d . . . . .
C17 C 0.2311(6) 0.5228(3) 0.0702(4) 0.0332(10) Uani 1 1 d . . . . .
H17A H 0.210466 0.500309 0.134523 0.050 Uiso 1 1 calc R U . . .
H17B H 0.282999 0.468442 0.030279 0.050 Uiso 1 1 calc R U . . .
H17C H 0.127211 0.548369 0.051329 0.050 Uiso 1 1 calc R U . . .
C18 C 0.3804(5) 0.6565(3) 0.2803(3) 0.0251(9) Uani 1 1 d . . . . .
C19 C 0.3424(6) 0.6243(3) 0.3780(3) 0.0256(9) Uani 1 1 d . . . . .
C20 C 0.2651(6) 0.5413(3) 0.4016(3) 0.0333(10) Uani 1 1 d . . . . .
H20 H 0.232276 0.506101 0.354812 0.040 Uiso 1 1 calc R U . . .
C21 C 0.2354(7) 0.5096(4) 0.4928(3) 0.0354(11) Uani 1 1 d . . . . .
H21 H 0.181138 0.453450 0.508247 0.042 Uiso 1 1 calc R U . . .
C22 C 0.2850(6) 0.5598(4) 0.5612(3) 0.0326(10) Uani 1 1 d . . . . .
C23 C 0.3608(7) 0.6433(4) 0.5383(3) 0.0382(11) Uani 1 1 d . . . . .
H23 H 0.392916 0.678672 0.585182 0.046 Uiso 1 1 calc R U . . .
C24 C 0.3892(6) 0.6747(3) 0.4478(3) 0.0328(10) Uani 1 1 d . . . . .
H24 H 0.441623 0.731553 0.432774 0.039 Uiso 1 1 calc R U . . .
C25 C 0.1990(7) 0.4444(4) 0.6769(4) 0.0443(13) Uani 1 1 d . . . . .
H25A H 0.087817 0.449310 0.662943 0.066 Uiso 1 1 calc R U . . .
H25B H 0.195738 0.431960 0.743202 0.066 Uiso 1 1 calc R U . . .
H25C H 0.267090 0.391093 0.641681 0.066 Uiso 1 1 calc R U . . .
O1SA O 0.9723(6) 0.1897(4) 0.8286(4) 0.0469(13) Uani 0.8 1 d D U P A 1
H1SA H 1.016775 0.227375 0.857600 0.070 Uiso 0.8 1 calc R U P A 1
C1SA C 1.0356(13) 0.1956(8) 0.7325(7) 0.059(2) Uani 0.8 1 d D U P A 1
H1S1 H 1.155798 0.178693 0.721141 0.071 Uiso 0.8 1 calc R U P A 1
H1S2 H 1.010253 0.262131 0.708887 0.071 Uiso 0.8 1 calc R U P A 1
C2SA C 0.9550(12) 0.1246(8) 0.6852(7) 0.072(3) Uani 0.8 1 d D U P A 1
H2S1 H 0.983433 0.058942 0.708063 0.108 Uiso 0.8 1 calc R U P A 1
H2S2 H 0.993161 0.127501 0.618311 0.108 Uiso 0.8 1 calc R U P A 1
H2S3 H 0.836054 0.141200 0.698380 0.108 Uiso 0.8 1 calc R U P A 1
O1SB O 1.008(3) 0.146(2) 0.7915(18) 0.060(5) Uani 0.2 1 d D U P B 2
H1SB H 1.090372 0.143822 0.817173 0.091 Uiso 0.2 1 calc R U P B 2
C1SB C 1.005(6) 0.227(3) 0.729(3) 0.060(4) Uani 0.2 1 d D U P B 2
H1S3 H 1.007876 0.288237 0.761075 0.073 Uiso 0.2 1 calc R U P B 2
H1S4 H 0.905312 0.232690 0.699838 0.073 Uiso 0.2 1 calc R U P B 2
C2SB C 1.158(3) 0.204(3) 0.657(2) 0.055(6) Uani 0.2 1 d D U P B 2
H2S4 H 1.197719 0.134586 0.661619 0.083 Uiso 0.2 1 calc R U P B 2
H2S5 H 1.242592 0.242676 0.669074 0.083 Uiso 0.2 1 calc R U P B 2
H2S6 H 1.132836 0.218331 0.595444 0.083 Uiso 0.2 1 calc R U P B 2
O2SA O 0.3682(14) 0.1992(8) 0.4021(6) 0.084(3) Uani 0.6 1 d . U P C 1
H2SA H 0.456227 0.180572 0.420888 0.126 Uiso 0.6 1 calc R U P C 1
C3SA C 0.2514(15) 0.2258(10) 0.4743(9) 0.064(3) Uani 0.6 1 d . U P C 1
H3S1 H 0.285921 0.278336 0.508000 0.077 Uiso 0.6 1 calc R U P C 1
H3S2 H 0.236900 0.169958 0.517123 0.077 Uiso 0.6 1 calc R U P C 1
C4SA C 0.0930(15) 0.2600(10) 0.4443(10) 0.064(3) Uani 0.6 1 d . U P C 1
H4S1 H 0.093111 0.327770 0.423796 0.096 Uiso 0.6 1 calc R U P C 1
H4S2 H 0.003269 0.254915 0.496267 0.096 Uiso 0.6 1 calc R U P C 1
H4S3 H 0.078321 0.219901 0.393227 0.096 Uiso 0.6 1 calc R U P C 1
O2SB O 0.042(4) 0.176(2) 0.432(2) 0.091(7) Uani 0.2 1 d D U P D 2
H2SB H 0.067972 0.126216 0.462369 0.136 Uiso 0.2 1 calc R U P D 2
C3SB C 0.157(5) 0.245(3) 0.434(3) 0.070(5) Uani 0.2 1 d D U P D 2
H3S3 H 0.271874 0.214522 0.417269 0.084 Uiso 0.2 1 calc R U P D 2
H3S4 H 0.142736 0.276038 0.495374 0.084 Uiso 0.2 1 calc R U P D 2
C4SB C 0.108(5) 0.314(3) 0.361(3) 0.074(7) Uani 0.2 1 d D U P D 2
H4S4 H 0.105319 0.278337 0.305113 0.110 Uiso 0.2 1 calc R U P D 2
H4S5 H 0.186982 0.361639 0.347364 0.110 Uiso 0.2 1 calc R U P D 2
H4S6 H -0.001020 0.347973 0.383663 0.110 Uiso 0.2 1 calc R U P D 2
O3SA O 0.389(3) 0.9276(15) 0.3760(14) 0.052(5) Uani 0.2 1 d D U P E -2
H3SA H 0.394176 0.945084 0.320517 0.078 Uiso 0.2 1 calc R U P E -2
C5SA C 0.459(5) 0.996(2) 0.424(2) 0.080(8) Uani 0.2 1 d D U P E -2
H5S1 H 0.405387 1.062050 0.417601 0.096 Uiso 0.2 1 calc R U P E -2
H5S2 H 0.577945 0.994494 0.400407 0.096 Uiso 0.2 1 calc R U P E -2
C6SA C 0.431(5) 0.963(3) 0.5251(19) 0.079(9) Uani 0.2 1 d D U P E -2
H6S1 H 0.313344 0.965348 0.547901 0.118 Uiso 0.2 1 calc R U P E -2
H6S2 H 0.478346 1.006542 0.562025 0.118 Uiso 0.2 1 calc R U P E -2
H6S3 H 0.483413 0.896730 0.530366 0.118 Uiso 0.2 1 calc R U P E -2
 
loop_
 _atom_site_aniso_label
 _atom_site_aniso_U_11
 _atom_site_aniso_U_22
 _atom_site_aniso_U_33
 _atom_site_aniso_U_23
 _atom_site_aniso_U_13
 _atom_site_aniso_U_12
Er1 0.03543(12) 0.02034(10) 0.02215(10) 0.00834(7) -0.01070(8) -0.01294(7)
Cl1 0.0318(5) 0.0316(5) 0.0271(5) 0.0064(4) -0.0069(4) -0.0091(4)
N1 0.0312(18) 0.0178(15) 0.0243(17) 0.0043(13) -0.0038(15) -0.0097(14)
N2 0.0295(18) 0.0203(16) 0.0252(17) 0.0065(13) -0.0080(15) -0.0087(14)
N3 0.0301(18) 0.0218(16) 0.0255(18) 0.0071(14) -0.0098(15) -0.0078(14)
N4 0.0293(18) 0.0212(16) 0.0226(17) 0.0063(13) -0.0062(15) -0.0082(14)
N5 0.036(2) 0.0234(17) 0.0234(17) 0.0069(14) -0.0038(16) -0.0104(15)
O1 0.054(2) 0.0298(16) 0.0249(15) 0.0140(13) -0.0178(16) -0.0225(15)
O2 0.0414(18) 0.0253(15) 0.0225(15) 0.0075(12) -0.0095(14) -0.0139(13)
O3 0.060(2) 0.0353(19) 0.041(2) -0.0023(16) -0.0018(19) -0.0302(18)
O4 0.059(2) 0.047(2) 0.0218(16) 0.0100(15) -0.0016(17) -0.0089(18)
O5 0.0378(18) 0.0251(15) 0.0344(18) 0.0131(13) -0.0131(15) -0.0114(14)
C1 0.043(3) 0.032(2) 0.046(3) 0.001(2) -0.001(2) -0.020(2)
C2 0.041(2) 0.026(2) 0.028(2) 0.0067(17) -0.005(2) -0.0180(19)
C3 0.048(3) 0.034(2) 0.027(2) 0.0017(19) -0.001(2) -0.021(2)
C4 0.037(2) 0.026(2) 0.034(2) 0.0009(18) -0.004(2) -0.0138(19)
C5 0.031(2) 0.024(2) 0.032(2) 0.0064(17) -0.0062(19) -0.0132(17)
C6 0.027(2) 0.024(2) 0.027(2) 0.0038(16) -0.0057(18) -0.0074(16)
C7 0.030(2) 0.0213(19) 0.028(2) 0.0063(16) -0.0076(18) -0.0081(16)
C8 0.029(2) 0.0206(18) 0.026(2) 0.0065(16) -0.0075(18) -0.0088(16)
C9 0.044(3) 0.031(2) 0.024(2) 0.0073(18) -0.004(2) -0.014(2)
C10 0.027(2) 0.0224(19) 0.023(2) 0.0064(16) -0.0058(17) -0.0068(16)
C11 0.032(2) 0.0220(19) 0.026(2) 0.0041(16) -0.0096(18) -0.0079(16)
C12 0.041(3) 0.035(2) 0.021(2) 0.0073(18) -0.009(2) -0.014(2)
C13 0.043(3) 0.035(2) 0.027(2) 0.0011(19) -0.014(2) -0.008(2)
C14 0.034(2) 0.028(2) 0.032(2) 0.0038(18) -0.014(2) -0.0099(18)
C15 0.030(2) 0.0214(19) 0.025(2) 0.0031(16) -0.0099(18) -0.0078(16)
C16 0.031(2) 0.0182(18) 0.029(2) 0.0040(16) -0.0085(19) -0.0082(16)
C17 0.040(3) 0.029(2) 0.034(2) 0.0006(19) -0.009(2) -0.0158(19)
C18 0.031(2) 0.0190(18) 0.027(2) 0.0091(16) -0.0067(18) -0.0073(16)
C19 0.032(2) 0.0227(19) 0.0219(19) 0.0063(16) -0.0053(18) -0.0042(16)
C20 0.045(3) 0.029(2) 0.029(2) 0.0089(18) -0.009(2) -0.015(2)
C21 0.047(3) 0.031(2) 0.031(2) 0.0125(19) -0.008(2) -0.016(2)
C22 0.039(2) 0.032(2) 0.026(2) 0.0091(18) -0.005(2) -0.0023(19)
C23 0.058(3) 0.036(3) 0.022(2) 0.0005(19) -0.007(2) -0.009(2)
C24 0.047(3) 0.029(2) 0.025(2) 0.0050(18) -0.008(2) -0.012(2)
C25 0.048(3) 0.054(3) 0.030(3) 0.018(2) -0.003(2) -0.009(3)
O1SA 0.035(3) 0.058(3) 0.050(3) 0.009(3) -0.002(2) -0.022(2)
C1SA 0.048(5) 0.076(6) 0.055(4) 0.012(4) -0.006(4) -0.026(4)
C2SA 0.066(5) 0.087(6) 0.057(5) 0.009(5) 0.005(4) -0.009(5)
O1SB 0.050(8) 0.079(10) 0.050(9) 0.020(8) 0.003(8) -0.019(8)
C1SB 0.051(8) 0.076(9) 0.057(7) 0.013(7) -0.007(7) -0.023(7)
C2SB 0.045(11) 0.067(13) 0.059(12) 0.010(11) -0.015(10) -0.021(10)
O2SA 0.104(7) 0.089(6) 0.056(5) 0.004(5) -0.006(5) -0.009(5)
C3SA 0.065(6) 0.070(6) 0.053(6) -0.011(5) -0.004(5) 0.000(5)
C4SA 0.054(6) 0.070(7) 0.070(7) -0.007(6) -0.023(6) 0.005(6)
O2SB 0.084(12) 0.097(13) 0.092(13) -0.015(12) -0.017(12) -0.009(12)
C3SB 0.073(9) 0.078(8) 0.060(8) -0.013(8) -0.016(8) -0.002(8)
C4SB 0.069(13) 0.084(14) 0.069(13) -0.017(12) -0.015(12) -0.008(12)
O3SA 0.056(6) 0.047(6) 0.051(6) 0.015(4) -0.006(4) -0.003(4)
C5SA 0.071(11) 0.079(11) 0.077(12) 0.012(10) 0.008(10) 0.010(10)
C6SA 0.084(16) 0.050(14) 0.084(16) 0.006(13) 0.029(14) 0.002(13)
 
_geom_special_details
;
 All esds (except the esd in the dihedral angle between two l.s. planes)
 are estimated using the full covariance matrix.  The cell esds are taken
 into account individually in the estimation of esds in distances, angles
 and torsion angles; correlations between esds in cell parameters are only
 used when they are defined by crystal symmetry.  An approximate (isotropic)
 treatment of cell esds is used for estimating esds involving l.s. planes.
;
 
loop_
 _geom_bond_atom_site_label_1
 _geom_bond_atom_site_label_2
 _geom_bond_distance
 _geom_bond_site_symmetry_2
 _geom_bond_publ_flag
Er1 O1 2.218(3) . ?
Er1 O2 2.244(3) . ?
Er1 O5 2.275(3) . ?
Er1 N3 2.404(4) . ?
Er1 N4 2.404(4) . ?
Er1 N2 2.429(3) . ?
Er1 Cl1 2.6087(12) . ?
N1 C8 1.328(6) . ?
N1 N2 1.394(5) . ?
N2 C10 1.291(6) . ?
N3 C11 1.348(5) . ?
N3 C15 1.353(5) . ?
N4 C16 1.291(6) . ?
N4 N5 1.378(5) . ?
N5 C18 1.319(6) . ?
O1 C8 1.292(5) . ?
O2 C18 1.295(5) . ?
O3 C4 1.366(6) . ?
O3 C1 1.421(6) . ?
O4 C22 1.363(6) . ?
O4 C25 1.429(7) . ?
O5 H5A 0.819(10) . ?
O5 H5B 0.818(10) . ?
C1 H1A 0.9800 . ?
C1 H1B 0.9800 . ?
C1 H1C 0.9800 . ?
C2 C3 1.371(7) . ?
C2 C7 1.390(7) . ?
C2 H2 0.9500 . ?
C3 C4 1.399(6) . ?
C3 H3 0.9500 . ?
C4 C5 1.384(7) . ?
C5 C6 1.385(6) . ?
C5 H5 0.9500 . ?
C6 C7 1.394(6) . ?
C6 H6 0.9500 . ?
C7 C8 1.484(6) . ?
C9 C10 1.495(6) . ?
C9 H9A 0.9800 . ?
C9 H9B 0.9800 . ?
C9 H9C 0.9800 . ?
C10 C11 1.494(6) . ?
C11 C12 1.391(6) . ?
C12 C13 1.392(7) . ?
C12 H12 0.9500 . ?
C13 C14 1.378(7) . ?
C13 H13 0.9500 . ?
C14 C15 1.393(6) . ?
C14 H14 0.9500 . ?
C15 C16 1.478(6) . ?
C16 C17 1.491(6) . ?
C17 H17A 0.9800 . ?
C17 H17B 0.9800 . ?
C17 H17C 0.9800 . ?
C18 C19 1.483(6) . ?
C19 C24 1.391(7) . ?
C19 C20 1.393(6) . ?
C20 C21 1.388(6) . ?
C20 H20 0.9500 . ?
C21 C22 1.385(7) . ?
C21 H21 0.9500 . ?
C22 C23 1.391(7) . ?
C23 C24 1.377(6) . ?
C23 H23 0.9500 . ?
C24 H24 0.9500 . ?
C25 H25A 0.9800 . ?
C25 H25B 0.9800 . ?
C25 H25C 0.9800 . ?
O1SA C1SA 1.422(10) . ?
O1SA H1SA 0.8400 . ?
C1SA C2SA 1.504(16) . ?
C1SA H1S1 0.9900 . ?
C1SA H1S2 0.9900 . ?
C2SA H2S1 0.9800 . ?
C2SA H2S2 0.9800 . ?
C2SA H2S3 0.9800 . ?
O1SB C1SB 1.436(19) . ?
O1SB H1SB 0.8400 . ?
C1SB C2SB 1.52(2) . ?
C1SB H1S3 0.9900 . ?
C1SB H1S4 0.9900 . ?
C2SB H2S4 0.9800 . ?
C2SB H2S5 0.9800 . ?
C2SB H2S6 0.9800 . ?
O2SA C3SA 1.338(14) . ?
O2SA H2SA 0.8400 . ?
C3SA C4SA 1.487(17) . ?
C3SA H3S1 0.9900 . ?
C3SA H3S2 0.9900 . ?
C4SA H4S1 0.9800 . ?
C4SA H4S2 0.9800 . ?
C4SA H4S3 0.9800 . ?
O2SB C3SB 1.44(2) . ?
O2SB H2SB 0.8400 . ?
C3SB C4SB 1.50(2) . ?
C3SB H3S3 0.9900 . ?
C3SB H3S4 0.9900 . ?
C4SB H4S4 0.9800 . ?
C4SB H4S5 0.9800 . ?
C4SB H4S6 0.9800 . ?
O3SA C5SA 1.43(2) . ?
O3SA H3SA 0.8400 . ?
C5SA C6SA 1.52(2) . ?
C5SA H5S1 0.9900 . ?
C5SA H5S2 0.9900 . ?
C6SA H6S1 0.9800 . ?
C6SA H6S2 0.9800 . ?
C6SA H6S3 0.9800 . ?
 
loop_
 _geom_angle_atom_site_label_1
 _geom_angle_atom_site_label_2
 _geom_angle_atom_site_label_3
 _geom_angle
 _geom_angle_site_symmetry_1
 _geom_angle_site_symmetry_3
 _geom_angle_publ_flag
O1 Er1 O2 95.38(12) . . ?
O1 Er1 O5 87.17(13) . . ?
O2 Er1 O5 91.32(12) . . ?
O1 Er1 N3 131.86(12) . . ?
O2 Er1 N3 132.15(12) . . ?
O5 Er1 N3 84.95(13) . . ?
O1 Er1 N4 161.18(13) . . ?
O2 Er1 N4 66.20(12) . . ?
O5 Er1 N4 89.32(12) . . ?
N3 Er1 N4 66.07(12) . . ?
O1 Er1 N2 65.89(12) . . ?
O2 Er1 N2 160.22(12) . . ?
O5 Er1 N2 81.84(12) . . ?
N3 Er1 N2 66.00(12) . . ?
N4 Er1 N2 131.80(12) . . ?
O1 Er1 Cl1 93.06(10) . . ?
O2 Er1 Cl1 97.57(9) . . ?
O5 Er1 Cl1 171.05(9) . . ?
N3 Er1 Cl1 88.26(9) . . ?
N4 Er1 Cl1 93.25(9) . . ?
N2 Er1 Cl1 90.08(9) . . ?
C8 N1 N2 109.2(3) . . ?
C10 N2 N1 119.6(3) . . ?
C10 N2 Er1 122.2(3) . . ?
N1 N2 Er1 118.1(3) . . ?
C11 N3 C15 120.0(4) . . ?
C11 N3 Er1 120.1(3) . . ?
C15 N3 Er1 119.7(3) . . ?
C16 N4 N5 118.4(4) . . ?
C16 N4 Er1 122.8(3) . . ?
N5 N4 Er1 118.7(3) . . ?
C18 N5 N4 109.7(3) . . ?
C8 O1 Er1 122.1(3) . . ?
C18 O2 Er1 120.0(3) . . ?
C4 O3 C1 118.1(4) . . ?
C22 O4 C25 117.0(4) . . ?
Er1 O5 H5A 121(4) . . ?
Er1 O5 H5B 125(4) . . ?
H5A O5 H5B 113(6) . . ?
O3 C1 H1A 109.5 . . ?
O3 C1 H1B 109.5 . . ?
H1A C1 H1B 109.5 . . ?
O3 C1 H1C 109.5 . . ?
H1A C1 H1C 109.5 . . ?
H1B C1 H1C 109.5 . . ?
C3 C2 C7 121.3(4) . . ?
C3 C2 H2 119.3 . . ?
C7 C2 H2 119.3 . . ?
C2 C3 C4 119.2(5) . . ?
C2 C3 H3 120.4 . . ?
C4 C3 H3 120.4 . . ?
O3 C4 C5 124.7(4) . . ?
O3 C4 C3 114.8(4) . . ?
C5 C4 C3 120.5(4) . . ?
C4 C5 C6 119.4(4) . . ?
C4 C5 H5 120.3 . . ?
C6 C5 H5 120.3 . . ?
C5 C6 C7 120.8(4) . . ?
C5 C6 H6 119.6 . . ?
C7 C6 H6 119.6 . . ?
C2 C7 C6 118.7(4) . . ?
C2 C7 C8 117.8(4) . . ?
C6 C7 C8 123.5(4) . . ?
O1 C8 N1 124.7(4) . . ?
O1 C8 C7 115.8(4) . . ?
N1 C8 C7 119.5(4) . . ?
C10 C9 H9A 109.5 . . ?
C10 C9 H9B 109.5 . . ?
H9A C9 H9B 109.5 . . ?
C10 C9 H9C 109.5 . . ?
H9A C9 H9C 109.5 . . ?
H9B C9 H9C 109.5 . . ?
N2 C10 C11 114.9(4) . . ?
N2 C10 C9 124.8(4) . . ?
C11 C10 C9 120.3(4) . . ?
N3 C11 C12 121.1(4) . . ?
N3 C11 C10 116.2(4) . . ?
C12 C11 C10 122.7(4) . . ?
C11 C12 C13 118.9(4) . . ?
C11 C12 H12 120.6 . . ?
C13 C12 H12 120.6 . . ?
C14 C13 C12 119.9(4) . . ?
C14 C13 H13 120.1 . . ?
C12 C13 H13 120.1 . . ?
C13 C14 C15 118.9(4) . . ?
C13 C14 H14 120.6 . . ?
C15 C14 H14 120.6 . . ?
N3 C15 C14 121.2(4) . . ?
N3 C15 C16 116.1(4) . . ?
C14 C15 C16 122.7(4) . . ?
N4 C16 C15 114.9(4) . . ?
N4 C16 C17 124.0(4) . . ?
C15 C16 C17 121.0(4) . . ?
C16 C17 H17A 109.5 . . ?
C16 C17 H17B 109.5 . . ?
H17A C17 H17B 109.5 . . ?
C16 C17 H17C 109.5 . . ?
H17A C17 H17C 109.5 . . ?
H17B C17 H17C 109.5 . . ?
O2 C18 N5 125.2(4) . . ?
O2 C18 C19 118.2(4) . . ?
N5 C18 C19 116.6(4) . . ?
C24 C19 C20 118.5(4) . . ?
C24 C19 C18 120.4(4) . . ?
C20 C19 C18 121.0(4) . . ?
C21 C20 C19 120.7(5) . . ?
C21 C20 H20 119.6 . . ?
C19 C20 H20 119.6 . . ?
C22 C21 C20 120.0(4) . . ?
C22 C21 H21 120.0 . . ?
C20 C21 H21 120.0 . . ?
O4 C22 C21 124.8(5) . . ?
O4 C22 C23 115.6(5) . . ?
C21 C22 C23 119.6(4) . . ?
C24 C23 C22 120.1(5) . . ?
C24 C23 H23 119.9 . . ?
C22 C23 H23 119.9 . . ?
C23 C24 C19 121.0(5) . . ?
C23 C24 H24 119.5 . . ?
C19 C24 H24 119.5 . . ?
O4 C25 H25A 109.5 . . ?
O4 C25 H25B 109.5 . . ?
H25A C25 H25B 109.5 . . ?
O4 C25 H25C 109.5 . . ?
H25A C25 H25C 109.5 . . ?
H25B C25 H25C 109.5 . . ?
C1SA O1SA H1SA 109.5 . . ?
O1SA C1SA C2SA 106.7(8) . . ?
O1SA C1SA H1S1 110.4 . . ?
C2SA C1SA H1S1 110.4 . . ?
O1SA C1SA H1S2 110.4 . . ?
C2SA C1SA H1S2 110.4 . . ?
H1S1 C1SA H1S2 108.6 . . ?
C1SA C2SA H2S1 109.5 . . ?
C1SA C2SA H2S2 109.5 . . ?
H2S1 C2SA H2S2 109.5 . . ?
C1SA C2SA H2S3 109.5 . . ?
H2S1 C2SA H2S3 109.5 . . ?
H2S2 C2SA H2S3 109.5 . . ?
C1SB O1SB H1SB 109.5 . . ?
O1SB C1SB C2SB 104(2) . . ?
O1SB C1SB H1S3 111.0 . . ?
C2SB C1SB H1S3 111.0 . . ?
O1SB C1SB H1S4 111.0 . . ?
C2SB C1SB H1S4 111.0 . . ?
H1S3 C1SB H1S4 109.0 . . ?
C1SB C2SB H2S4 109.5 . . ?
C1SB C2SB H2S5 109.5 . . ?
H2S4 C2SB H2S5 109.5 . . ?
C1SB C2SB H2S6 109.5 . . ?
H2S4 C2SB H2S6 109.5 . . ?
H2S5 C2SB H2S6 109.5 . . ?
C3SA O2SA H2SA 109.5 . . ?
O2SA C3SA C4SA 111.5(12) . . ?
O2SA C3SA H3S1 109.3 . . ?
C4SA C3SA H3S1 109.3 . . ?
O2SA C3SA H3S2 109.3 . . ?
C4SA C3SA H3S2 109.3 . . ?
H3S1 C3SA H3S2 108.0 . . ?
C3SA C4SA H4S1 109.5 . . ?
C3SA C4SA H4S2 109.5 . . ?
H4S1 C4SA H4S2 109.5 . . ?
C3SA C4SA H4S3 109.5 . . ?
H4S1 C4SA H4S3 109.5 . . ?
H4S2 C4SA H4S3 109.5 . . ?
C3SB O2SB H2SB 109.5 . . ?
O2SB C3SB C4SB 99(2) . . ?
O2SB C3SB H3S3 112.0 . . ?
C4SB C3SB H3S3 112.0 . . ?
O2SB C3SB H3S4 112.0 . . ?
C4SB C3SB H3S4 112.0 . . ?
H3S3 C3SB H3S4 109.6 . . ?
C3SB C4SB H4S4 109.5 . . ?
C3SB C4SB H4S5 109.5 . . ?
H4S4 C4SB H4S5 109.5 . . ?
C3SB C4SB H4S6 109.5 . . ?
H4S4 C4SB H4S6 109.5 . . ?
H4S5 C4SB H4S6 109.5 . . ?
C5SA O3SA H3SA 109.5 . . ?
O3SA C5SA C6SA 106(2) . . ?
O3SA C5SA H5S1 110.6 . . ?
C6SA C5SA H5S1 110.6 . . ?
O3SA C5SA H5S2 110.6 . . ?
C6SA C5SA H5S2 110.6 . . ?
H5S1 C5SA H5S2 108.8 . . ?
C5SA C6SA H6S1 109.5 . . ?
C5SA C6SA H6S2 109.5 . . ?
H6S1 C6SA H6S2 109.5 . . ?
C5SA C6SA H6S3 109.5 . . ?
H6S1 C6SA H6S3 109.5 . . ?
H6S2 C6SA H6S3 109.5 . . ?
 
loop_
 _geom_torsion_atom_site_label_1
 _geom_torsion_atom_site_label_2
 _geom_torsion_atom_site_label_3
 _geom_torsion_atom_site_label_4
 _geom_torsion
 _geom_torsion_site_symmetry_1
 _geom_torsion_site_symmetry_2
 _geom_torsion_site_symmetry_3
 _geom_torsion_site_symmetry_4
 _geom_torsion_publ_flag
C8 N1 N2 C10 -174.1(4) . . . . ?
C8 N1 N2 Er1 2.2(4) . . . . ?
C16 N4 N5 C18 -177.1(4) . . . . ?
Er1 N4 N5 C18 0.9(5) . . . . ?
C7 C2 C3 C4 -0.1(8) . . . . ?
C1 O3 C4 C5 4.7(8) . . . . ?
C1 O3 C4 C3 -176.3(5) . . . . ?
C2 C3 C4 O3 179.5(5) . . . . ?
C2 C3 C4 C5 -1.5(8) . . . . ?
O3 C4 C5 C6 -179.9(5) . . . . ?
C3 C4 C5 C6 1.2(7) . . . . ?
C4 C5 C6 C7 0.7(7) . . . . ?
C3 C2 C7 C6 1.9(7) . . . . ?
C3 C2 C7 C8 -177.8(5) . . . . ?
C5 C6 C7 C2 -2.2(7) . . . . ?
C5 C6 C7 C8 177.5(4) . . . . ?
Er1 O1 C8 N1 -0.7(6) . . . . ?
Er1 O1 C8 C7 177.4(3) . . . . ?
N2 N1 C8 O1 -1.1(6) . . . . ?
N2 N1 C8 C7 -179.1(4) . . . . ?
C2 C7 C8 O1 -13.7(6) . . . . ?
C6 C7 C8 O1 166.6(4) . . . . ?
C2 C7 C8 N1 164.5(4) . . . . ?
C6 C7 C8 N1 -15.2(7) . . . . ?
N1 N2 C10 C11 -177.5(4) . . . . ?
Er1 N2 C10 C11 6.3(5) . . . . ?
N1 N2 C10 C9 1.1(7) . . . . ?
Er1 N2 C10 C9 -175.0(3) . . . . ?
C15 N3 C11 C12 -2.4(7) . . . . ?
Er1 N3 C11 C12 172.6(3) . . . . ?
C15 N3 C11 C10 178.2(4) . . . . ?
Er1 N3 C11 C10 -6.7(5) . . . . ?
N2 C10 C11 N3 0.3(6) . . . . ?
C9 C10 C11 N3 -178.4(4) . . . . ?
N2 C10 C11 C12 -179.0(4) . . . . ?
C9 C10 C11 C12 2.3(7) . . . . ?
N3 C11 C12 C13 0.2(7) . . . . ?
C10 C11 C12 C13 179.5(4) . . . . ?
C11 C12 C13 C14 1.2(7) . . . . ?
C12 C13 C14 C15 -0.4(7) . . . . ?
C11 N3 C15 C14 3.3(6) . . . . ?
Er1 N3 C15 C14 -171.8(3) . . . . ?
C11 N3 C15 C16 -178.4(4) . . . . ?
Er1 N3 C15 C16 6.5(5) . . . . ?
C13 C14 C15 N3 -1.9(7) . . . . ?
C13 C14 C15 C16 179.9(4) . . . . ?
N5 N4 C16 C15 -177.7(4) . . . . ?
Er1 N4 C16 C15 4.4(5) . . . . ?
N5 N4 C16 C17 3.4(7) . . . . ?
Er1 N4 C16 C17 -174.5(3) . . . . ?
N3 C15 C16 N4 -7.0(6) . . . . ?
C14 C15 C16 N4 171.3(4) . . . . ?
N3 C15 C16 C17 171.9(4) . . . . ?
C14 C15 C16 C17 -9.8(7) . . . . ?
Er1 O2 C18 N5 -5.0(6) . . . . ?
Er1 O2 C18 C19 174.0(3) . . . . ?
N4 N5 C18 O2 2.5(6) . . . . ?
N4 N5 C18 C19 -176.4(4) . . . . ?
O2 C18 C19 C24 1.0(6) . . . . ?
N5 C18 C19 C24 -180.0(4) . . . . ?
O2 C18 C19 C20 -176.5(4) . . . . ?
N5 C18 C19 C20 2.5(7) . . . . ?
C24 C19 C20 C21 0.0(7) . . . . ?
C18 C19 C20 C21 177.6(5) . . . . ?
C19 C20 C21 C22 -0.9(8) . . . . ?
C25 O4 C22 C21 3.3(8) . . . . ?
C25 O4 C22 C23 -176.1(5) . . . . ?
C20 C21 C22 O4 -177.8(5) . . . . ?
C20 C21 C22 C23 1.6(8) . . . . ?
O4 C22 C23 C24 178.1(5) . . . . ?
C21 C22 C23 C24 -1.3(8) . . . . ?
C22 C23 C24 C19 0.4(8) . . . . ?
C20 C19 C24 C23 0.3(7) . . . . ?
C18 C19 C24 C23 -177.3(5) . . . . ?
 
_refine_diff_density_max    3.516
_refine_diff_density_min   -1.856
_refine_diff_density_rms    0.152

_shelx_res_file
;
TITL 2man1_4 in P1               New: P-1
    tb11.res
    created by SHELXL-2016/6 at 14:58:45 on 22-May-2020
CELL  0.71073   8.3532  13.8859  14.6874   88.386   80.033   83.244
ZERR     2.00   0.0002   0.0002   0.0004    0.002    0.002    0.002
LATT   1
SFAC  C    H    CL   ER   N    O
UNIT  58   74   2    2    10   14
MERG   2
simu 0.01 0.02 o1sa > c4sb
simu 0.01 0.02 o3sa > c6sa
isor 0.002 o3sa
isor 0.015 c5sa c6sa
FMAP   2
PLAN  30
size 0.12 0.21 0.24
ACTA    52.00
BOND   $H
omit     0  -1   1
omit     0   0   2
omit     0  -2   2
omit     0  -2   1
omit     0  -3   1
omit    -1  -1   1
omit     0   3   0
omit    -1  -1   2
omit     0   1   2
omit     0  -3   2

omit     0   2   1
omit    -1  -2   1
omit     0  -1   2
omit     1  -2   1
omit    -2   1   4
omit     4   2   7
omit    -2  -2   6
omit    -1  -2   3
omit    -1   2   2
omit     0   1   1
omit    -2   5   2
CONF
L.S.  10
dfix 0.82 0.01 o5 h5a o5 h5b
TEMP  -153.00
WGHT    0.047200    6.929400
FVAR       1.85954
MOLE    1
ER1   4    0.542905    0.774877    0.114675    11.00000    0.03543    0.02034 =
         0.02215    0.00834   -0.01070   -0.01294
CL1   3    0.820846    0.663682    0.086722    11.00000    0.03176    0.03162 =
         0.02712    0.00645   -0.00691   -0.00912
N1    5    0.707817    0.957018   -0.003074    11.00000    0.03122    0.01777 =
         0.02434    0.00430   -0.00379   -0.00971
N2    5    0.638324    0.873697   -0.018320    11.00000    0.02953    0.02027 =
         0.02521    0.00647   -0.00796   -0.00872
N3    5    0.489539    0.718562   -0.029237    11.00000    0.03006    0.02182 =
         0.02548    0.00709   -0.00979   -0.00785
N4    5    0.384010    0.639940    0.130976    11.00000    0.02933    0.02118 =
         0.02255    0.00634   -0.00623   -0.00821
N5    5    0.331620    0.604817    0.218411    11.00000    0.03633    0.02336 =
         0.02342    0.00690   -0.00382   -0.01040
O1    6    0.657828    0.902298    0.148804    11.00000    0.05443    0.02977 =
         0.02485    0.01402   -0.01782   -0.02245
O2    6    0.459911    0.731261    0.261973    11.00000    0.04144    0.02533 =
         0.02250    0.00750   -0.00950   -0.01388
O3    6    0.934349    1.281101    0.235712    11.00000    0.05970    0.03527 =
         0.04087   -0.00230   -0.00177   -0.03017
O4    6    0.266774    0.533246    0.652116    11.00000    0.05942    0.04714 =
         0.02181    0.00998   -0.00157   -0.00890
O5    6    0.309228    0.877211    0.115039    11.00000    0.03781    0.02513 =
         0.03438    0.01305   -0.01312   -0.01141
H5A   2    0.219803    0.859965    0.136512    11.00000   -1.50000
H5B   2    0.301970    0.928395    0.086277    11.00000   -1.50000
C1    1    1.016650    1.351406    0.179763    11.00000    0.04256    0.03208 =
         0.04580    0.00055   -0.00090   -0.02018
AFIX 137
H1A   2    1.117350    1.319733    0.143105    11.00000   -1.50000
H1B   2    1.043889    1.400589    0.219319    11.00000   -1.50000
H1C   2    0.945485    1.382395    0.138269    11.00000   -1.50000
AFIX   0
C2    1    0.746398    1.064716    0.215130    11.00000    0.04107    0.02563 =
         0.02790    0.00674   -0.00451   -0.01804
AFIX  43
H2    2    0.686005    1.021858    0.255153    11.00000   -1.20000
AFIX   0
C3    1    0.799322    1.142543    0.251764    11.00000    0.04832    0.03436 =
         0.02717    0.00167   -0.00137   -0.02139
AFIX  43
H3    2    0.775748    1.153602    0.316493    11.00000   -1.20000
AFIX   0
C4    1    0.888434    1.205459    0.192694    11.00000    0.03697    0.02611 =
         0.03433    0.00088   -0.00412   -0.01380
C5    1    0.926121    1.188312    0.098647    11.00000    0.03109    0.02431 =
         0.03186    0.00640   -0.00619   -0.01318
AFIX  43
H5    2    0.988383    1.230521    0.058876    11.00000   -1.20000
AFIX   0
C6    1    0.872246    1.109039    0.063000    11.00000    0.02744    0.02443 =
         0.02698    0.00382   -0.00571   -0.00736
AFIX  43
H6    2    0.898935    1.096639   -0.001450    11.00000   -1.20000
AFIX   0
C7    1    0.779320    1.047254    0.120616    11.00000    0.02966    0.02125 =
         0.02752    0.00628   -0.00759   -0.00810
C8    1    0.712390    0.963438    0.086435    11.00000    0.02902    0.02065 =
         0.02637    0.00652   -0.00751   -0.00877
C9    1    0.702986    0.902072   -0.186839    11.00000    0.04389    0.03071 =
         0.02390    0.00732   -0.00398   -0.01418
AFIX 137
H9A   2    0.617690    0.950238   -0.204128    11.00000   -1.50000
H9B   2    0.741510    0.856111   -0.237516    11.00000   -1.50000
H9C   2    0.794625    0.934881   -0.174570    11.00000   -1.50000
AFIX   0
C10   1    0.634532    0.848652   -0.101862    11.00000    0.02735    0.02237 =
         0.02339    0.00641   -0.00582   -0.00684
C11   1    0.550966    0.760600   -0.109542    11.00000    0.03247    0.02198 =
         0.02554    0.00409   -0.00963   -0.00790
C12   1    0.537647    0.722421   -0.194111    11.00000    0.04073    0.03458 =
         0.02132    0.00732   -0.00916   -0.01403
AFIX  43
H12   2    0.581546    0.752371   -0.250400    11.00000   -1.20000
AFIX   0
C13   1    0.458886    0.639574   -0.194832    11.00000    0.04271    0.03467 =
         0.02655    0.00105   -0.01422   -0.00762
AFIX  43
H13   2    0.450476    0.611718   -0.251914    11.00000   -1.20000
AFIX   0
C14   1    0.393149    0.598046   -0.112607    11.00000    0.03414    0.02759 =
         0.03153    0.00379   -0.01432   -0.00986
AFIX  43
H14   2    0.338526    0.541744   -0.112322    11.00000   -1.20000
AFIX   0
C15   1    0.408125    0.639996   -0.029914    11.00000    0.02970    0.02140 =
         0.02543    0.00312   -0.00994   -0.00783
C16   1    0.341405    0.600671    0.061545    11.00000    0.03146    0.01822 =
         0.02894    0.00401   -0.00853   -0.00817
C17   1    0.231072    0.522777    0.070156    11.00000    0.04008    0.02889 =
         0.03431    0.00060   -0.00885   -0.01577
AFIX 137
H17A  2    0.210466    0.500309    0.134523    11.00000   -1.50000
H17B  2    0.282999    0.468442    0.030279    11.00000   -1.50000
H17C  2    0.127211    0.548369    0.051329    11.00000   -1.50000
AFIX   0
C18   1    0.380372    0.656472    0.280273    11.00000    0.03051    0.01895 =
         0.02714    0.00909   -0.00672   -0.00726
C19   1    0.342422    0.624345    0.377985    11.00000    0.03241    0.02273 =
         0.02192    0.00626   -0.00531   -0.00421
C20   1    0.265070    0.541339    0.401607    11.00000    0.04477    0.02934 =
         0.02889    0.00888   -0.00921   -0.01470
AFIX  43
H20   2    0.232276    0.506101    0.354812    11.00000   -1.20000
AFIX   0
C21   1    0.235422    0.509591    0.492776    11.00000    0.04710    0.03100 =
         0.03057    0.01252   -0.00781   -0.01647
AFIX  43
H21   2    0.181138    0.453450    0.508247    11.00000   -1.20000
AFIX   0
C22   1    0.284985    0.559768    0.561184    11.00000    0.03856    0.03179 =
         0.02604    0.00908   -0.00468   -0.00227
C23   1    0.360752    0.643254    0.538295    11.00000    0.05820    0.03565 =
         0.02162    0.00053   -0.00691   -0.00871
AFIX  43
H23   2    0.392916    0.678672    0.585182    11.00000   -1.20000
AFIX   0
C24   1    0.389221    0.674658    0.447781    11.00000    0.04676    0.02916 =
         0.02473    0.00500   -0.00756   -0.01248
AFIX  43
H24   2    0.441623    0.731553    0.432774    11.00000   -1.20000
AFIX   0
C25   1    0.199035    0.444427    0.676934    11.00000    0.04805    0.05365 =
         0.02971    0.01796   -0.00303   -0.00906
AFIX 137
H25A  2    0.087817    0.449310    0.662943    11.00000   -1.50000
H25B  2    0.195738    0.431960    0.743202    11.00000   -1.50000
H25C  2    0.267090    0.391093    0.641681    11.00000   -1.50000
AFIX   0
MOLE    2
PART    1
O1SA  6    0.972312    0.189743    0.828585    10.80000    0.03482    0.05780 =
         0.04997    0.00930   -0.00238   -0.02202
AFIX  83
H1SA  2    1.016775    0.227375    0.857600    10.80000   -1.50000
AFIX   0
C1SA  1    1.035579    0.195588    0.732492    10.80000    0.04836    0.07644 =
         0.05492    0.01228   -0.00638   -0.02582
AFIX  23
H1S1  2    1.155798    0.178693    0.721141    10.80000   -1.20000
H1S2  2    1.010253    0.262131    0.708887    10.80000   -1.20000
AFIX   0
C2SA  1    0.955040    0.124625    0.685191    10.80000    0.06619    0.08737 =
         0.05706    0.00862    0.00533   -0.00890
AFIX 137
H2S1  2    0.983433    0.058942    0.708063    10.80000   -1.50000
H2S2  2    0.993161    0.127501    0.618311    10.80000   -1.50000
H2S3  2    0.836054    0.141200    0.698380    10.80000   -1.50000
AFIX   0
PART    2
same o1sa > c2sa
O1SB  6    1.007630    0.145761    0.791519    10.20000    0.05047    0.07892 =
         0.04955    0.02026    0.00306   -0.01949
AFIX  83
H1SB  2    1.090372    0.143822    0.817173    10.20000   -1.50000
AFIX   0
C1SB  1    1.004545    0.227014    0.728864    10.20000    0.05061    0.07596 =
         0.05677    0.01346   -0.00664   -0.02260
AFIX  23
H1S3  2    1.007876    0.288237    0.761075    10.20000   -1.20000
H1S4  2    0.905312    0.232690    0.699838    10.20000   -1.20000
AFIX   0
C2SB  1    1.158033    0.203573    0.657414    10.20000    0.04463    0.06730 =
         0.05949    0.00956   -0.01522   -0.02059
AFIX 137
H2S4  2    1.197719    0.134586    0.661619    10.20000   -1.50000
H2S5  2    1.242592    0.242676    0.669074    10.20000   -1.50000
H2S6  2    1.132836    0.218331    0.595444    10.20000   -1.50000
AFIX   0
MOLE    3
PART    1
O2SA  6    0.368197    0.199226    0.402079    10.60000    0.10379    0.08917 =
         0.05554    0.00374   -0.00558   -0.00878
AFIX  83
H2SA  2    0.456227    0.180572    0.420888    10.60000   -1.50000
AFIX   0
C3SA  1    0.251446    0.225784    0.474267    10.60000    0.06548    0.06993 =
         0.05303   -0.01059   -0.00427   -0.00008
AFIX  23
H3S1  2    0.285921    0.278336    0.508000    10.60000   -1.20000
H3S2  2    0.236900    0.169958    0.517123    10.60000   -1.20000
AFIX   0
C4SA  1    0.093030    0.260011    0.444337    10.60000    0.05371    0.06973 =
         0.06965   -0.00748   -0.02338    0.00525
AFIX 137
H4S1  2    0.093111    0.327770    0.423796    10.60000   -1.50000
H4S2  2    0.003269    0.254915    0.496267    10.60000   -1.50000
H4S3  2    0.078321    0.219901    0.393227    10.60000   -1.50000
AFIX   0
PART    2
same o1sa > c2sa
O2SB  6    0.041804    0.176159    0.432200    10.20000    0.08363    0.09723 =
         0.09208   -0.01506   -0.01724   -0.00883
AFIX  83
H2SB  2    0.067972    0.126216    0.462369    10.20000   -1.50000
AFIX   0
C3SB  1    0.157480    0.244682    0.434316    10.20000    0.07311    0.07761 =
         0.05966   -0.01271   -0.01585   -0.00212
AFIX  23
H3S3  2    0.271874    0.214522    0.417269    10.20000   -1.20000
H3S4  2    0.142736    0.276038    0.495374    10.20000   -1.20000
AFIX   0
C4SB  1    0.107881    0.314198    0.361267    10.20000    0.06901    0.08444 =
         0.06881   -0.01659   -0.01485   -0.00751
AFIX 137
H4S4  2    0.105319    0.278337    0.305113    10.20000   -1.50000
H4S5  2    0.186982    0.361639    0.347364    10.20000   -1.50000
H4S6  2   -0.001020    0.347973    0.383663    10.20000   -1.50000
AFIX   0
MOLE    4
PART    -2
same o1sa > c2sa
O3SA  6    0.389481    0.927570    0.376035    10.20000    0.05561    0.04729 =
         0.05077    0.01512   -0.00636   -0.00349
AFIX  83
H3SA  2    0.394176    0.945084    0.320517    10.20000   -1.50000
AFIX   0
C5SA  1    0.459481    0.995516    0.424446    10.20000    0.07137    0.07928 =
         0.07726    0.01190    0.00776    0.01033
AFIX  23
H5S1  2    0.405387    1.062050    0.417601    10.20000   -1.20000
H5S2  2    0.577945    0.994494    0.400407    10.20000   -1.20000
AFIX   0
C6SA  1    0.431127    0.963159    0.525129    10.20000    0.08397    0.05025 =
         0.08372    0.00616    0.02881    0.00221
AFIX 137
H6S1  2    0.313344    0.965348    0.547901    10.20000   -1.50000
H6S2  2    0.478346    1.006542    0.562025    10.20000   -1.50000
H6S3  2    0.483413    0.896730    0.530366    10.20000   -1.50000
AFIX   0
HKLF    4


REM  2man1_4 in P1               New: P-1
REM R1 =  0.0447 for    7803 Fo > 4sig(Fo)  and  0.0559 for all    9018 data
REM    484 parameters refined using    170 restraints

END

WGHT      0.0477      4.0776

REM Highest difference peak  3.516,  deepest hole -1.856,  1-sigma level  0.152
Q1    1   0.6392  0.7612  0.0969  11.00000  0.05    3.52
Q2    1   0.3760  0.6765  0.6539  11.00000  0.05    1.76
Q3    1   0.4669  0.8204  0.1355  11.00000  0.05    1.48
Q4    1   0.3676  0.9585  0.4111  11.00000  0.05    1.15
Q5    1   0.3641  0.9080  0.3612  11.00000  0.05    1.12
Q6    1   0.4258  0.7944  0.1153  11.00000  0.05    1.09
Q7    1   0.2181  0.9517  0.3783  11.00000  0.05    1.06
Q8    1   0.4413  0.9473  0.4034  11.00000  0.05    1.06
Q9    1   0.3002  0.9346  0.4947  11.00000  0.05    0.98
Q10   1   0.4113  0.9144  0.3492  11.00000  0.05    0.97
Q11   1   0.7357  0.7040  0.1093  11.00000  0.05    0.94
Q12   1   0.4562  0.7628  0.1750  11.00000  0.05    0.93
Q13   1   0.2600  1.0168  0.5167  11.00000  0.05    0.89
Q14   1   0.4661  1.0255  0.3903  11.00000  0.05    0.89
Q15   1   0.3997  0.7693  0.1204  11.00000  0.05    0.85
Q16   1   0.4156  0.7649  0.0234  11.00000  0.05    0.83
Q17   1  -0.1342  0.0828  0.5274  11.00000  0.05    0.80
Q18   1   0.7464  0.8825  0.1445  11.00000  0.05    0.77
Q19   1   0.2601  0.2652  0.4164  11.00000  0.05    0.75
Q20   1   0.5530  0.7612  0.1616  11.00000  0.05    0.75
Q21   1   0.4876  0.8079  0.0740  11.00000  0.05    0.74
Q22   1   0.5751  0.7221  0.0437  11.00000  0.05    0.73
Q23   1   0.3833  0.8589  0.1124  11.00000  0.05    0.71
Q24   1   0.5401  0.7422  0.2233  11.00000  0.05    0.68
Q25   1   0.6634  0.8408  0.1225  11.00000  0.05    0.68
Q26   1   0.0639  0.1975  0.3752  11.00000  0.05    0.67
Q27   1   0.5705  1.0298  0.4283  11.00000  0.05    0.66
Q28   1   0.6624  0.7805  0.2036  11.00000  0.05    0.63
Q29   1   0.8996  1.2143  0.3189  11.00000  0.05    0.61
Q30   1   0.4407  0.6899  0.0959  11.00000  0.05    0.57
;
_shelx_res_checksum   49331

_shelx_hkl_file
;
  -5   6  -3 5816.13 314.786   6
  -5   6  -2 476.365 111.984   6
  -5   7  -2 14013.2 476.338   6
  -5   7  -1 16057.3 482.230   6
  -5   8  -1 491.286 107.593   6
  -5   8   0 5884.53 285.682   6
  -5   8   1 6872.15 280.406   6
  -5   9   0 96.4757 73.2713   6
  -5   9   1 1489.55 145.019   6
  -4  -1   9 15003.3 234.323   5
  -4  -1  10 3375.06 119.580   5
  -4   0   8 133.034 34.3296   5
  -4   0   9 838.934 63.0361   5
  -4   0  10 7988.49 234.443   5
  -4   1   7 2094.07 121.747   5
  -4   1   8 4834.30 192.790   5
  -4   1   9 2628.23 148.119   5
  -4   1  10 23.3599 52.2605   5
  -4   2   6 5812.90 225.218   5
  -4   2   7-7.93652 62.5983   5
  -4   2   8 806.710 95.2280   5
  -4   2   9 4411.09 219.322   5
  -4   2  10 4004.91 214.290   5
  -4   3  -6 16451.6 529.257   6
  -4   3  -5 14752.7 475.809   6
  -4   3   5 1619.28 123.682   5
  -4   3   6 7659.23 282.440   5
  -4   3   7 9624.65 328.975   5
  -4   3   8 5336.38 248.129   5
  -4   3   9 433.978 88.2182   5
  -4   3  10 48.9279 60.1641   5
  -4   4  -5 6238.15 317.832   6
  -4   4  -4 22315.8 574.961   6
  -4   4  -3 8865.04 341.747   6
  -4   4  -2 8354.87 312.202   6
  -4   4   4 9457.89 334.951   5
  -4   4   5 16448.2 453.005   5
  -4   4   6 4826.28 246.781   5
  -4   4   7 723.460 103.144   5
  -4   4   8 6242.90 293.139   5
  -4   4   9 10640.3 397.965   5
  -4   5  -4 182.260 83.5607   6
  -4   5  -3 1456.67 155.618   6
  -4   5  -2 5935.80 272.813   6
  -4   5  -1 12657.0 377.823   6
  -4   5   0 1998.31 142.793   6
  -4   5   4 287.245 65.7761   5
  -4   5   5 2118.54 173.311   5
  -4   6  -4 13477.6 468.138   6
  -4   6  -3 6959.37 320.060   6
  -4   6  -2 42.9861 62.6355   6
  -4   6  -1 7232.12 293.521   6
  -4   6   0 13586.8 370.167   6
  -4   6   1 7701.78 255.247   6
  -4   6   2 270.251 55.2276   6
  -4   7  -3 12654.6 446.473   6
  -4   7  -2 12800.1 426.502   6
  -4   7  -1 5589.52 267.212   6
  -4   7   0 107.305 64.6716   6
  -4   7   1 7350.26 262.760   6
  -4   7   2 9451.69 266.994   6
  -4   7   3 4441.70 158.847   6
  -4   8  -2 1446.67 159.627   6
  -4   8  -1 4340.02 254.544   6
  -4   8   0 10251.0 363.383   6
  -4   8   1 6802.59 272.844   6
  -4   8   2 93.9217 51.4908   6
  -4   8   3 3192.79 151.584   6
  -4   8   4 9861.72 218.701   6
  -4   9  -1 1944.76 173.453   6
  -4   9   0 377.737 82.1967   6
  -4   9   1 6277.44 280.921   6
  -4   9   2 9298.08 315.768   6
  -4   9   3 3997.83 187.676   6
  -4   9   4 187.253 47.4490   6
  -4  10   0 10328.0 400.691   6
  -4  10   1 2039.83 169.906   6
  -4  10   2 602.360 96.6711   6
  -3 -12   8 6811.77 350.877   5
  -3 -11   7 3297.77 231.124   5
  -3 -11   8 858.778 123.449   5
  -3 -11   9 9574.62 357.029   5
  -3 -10   6-19.4788 91.5364   5
  -3 -10   7 13473.0 407.367   5
  -3 -10   8 11626.3 368.382   5
  -3 -10   9 4817.95 235.589   5
  -3  -9   6 22007.3 510.412   5
  -3  -9   7 18663.4 433.486   5
  -3  -9   8 1025.24 111.087   5
  -3  -9   9 10155.4 307.295   5
  -3  -9  10 14376.7 360.602   5
  -3  -8   6 2467.74 151.528   5
  -3  -8   7 5744.45 214.558   5
  -3  -8   8 29965.9 487.496   5
  -3  -8   9 6084.43 210.945   5
  -3  -8  10 648.267 82.9862   5
  -3  -7   6 14976.6 325.776   5
  -3  -7   7 26.0774 41.4002   5
  -3  -7   8 1885.62 111.231   5
  -3  -7   9 17443.3 320.946   5
  -3  -7  10 11412.8 258.963   5
  -3  -7  11 1177.20 92.2875   5
  -3  -6   7 9900.24 205.907   5
  -3  -6   8 3498.75 120.994   5
  -3  -6   9 50.3382 33.6401   5
  -3  -6  10 5155.08 162.605   5
  -3  -6  11 10468.5 236.974   5
  -3  -5   7 3541.37 90.5372   5
  -3  -5   8 3703.41 98.3653   5
  -3  -5   9 10098.4 186.851   5
  -3  -5  10 1900.45 89.1557   5
  -3  -5  11-21.1235 37.3067   5
  -3  -5  12 2243.83 113.307   5
  -3  -4   9 3495.27 101.516   5
  -3  -4  10 14494.3 250.994   5
  -3  -4  11 7186.37 344.750   6
  -3  -4  12-87.3874 121.202   6
  -3  -4  13 1305.80 167.435   6
  -3  -4  14 4797.77 315.364   6
  -3  -4  15 4943.96 336.542   6
  -3  -3   8 9457.74 147.550   5
  -3  -3   9 2516.13 105.603   5
  -3  -3  10-214.290 136.495   6
  -3  -3  11 673.551 101.316   6
  -3  -3  12 6007.77 311.679   6
  -3  -3  13 4560.06 289.667   6
  -3  -3  14 1712.98 180.359   6
  -3  -3  15 341.467 98.3339   6
  -3  -3  16 6033.49 365.289   6
  -3  -2   7 8833.18 138.642   5
  -3  -2   8 1527.47 73.1805   5
  -3  -2   9 6480.57 178.173   5
  -3  -2  10 23761.2 545.110   6
  -3  -2  10 22544.6 390.718   5
  -3  -2  11 19580.6 518.228   6
  -3  -2  11 17643.5 380.594   5
  -3  -2  12 2946.82 216.351   6
  -3  -2  13 2478.02 206.388   6
  -3  -2  14 3629.58 249.712   6
  -3  -2  15 3069.02 244.773   6
  -3  -1   6 78.2447 24.6586   5
  -3  -1   7 20115.0 292.347   5
  -3  -1   8 22422.4 342.479   5
  -3  -1   9 9916.14 249.494   5
  -3  -1  10 135.953 51.9724   5
  -3  -1  10 192.946 69.3561   6
  -3  -1  11 8372.32 274.706   5
  -3  -1  11 8866.14 332.104   6
  -3  -1  12 11834.1 404.584   6
  -3  -1  13 13632.1 452.822   6
  -3  -1  14 973.304 135.804   6
  -3  -1  15 7.89828 91.2009   6
  -3   0   5 26795.2 353.323   5
  -3   0   6 17998.6 297.771   5
  -3   0   7 8102.44 216.261   5
  -3   0   8 212.212 52.9064   5
  -3   0   9 7030.89 234.207   5
  -3   0  10 10587.9 312.858   6
  -3   0  10 10128.9 303.667   5
  -3   0  11 6774.81 269.623   6
  -3   0  11 6486.83 262.810   5
  -3   0  12-40.8205 71.2474   5
  -3   0  12-4.39588 82.0953   6
  -3   0  13 2268.88 175.967   6
  -3   0  14 6733.47 314.395   6
  -3   1   4 36753.7 477.793   5
  -3   1   5 1532.03 98.1071   5
  -3   1   6 13137.1 292.356   5
  -3   1   7 17711.4 372.055   5
  -3   1   8 20700.0 412.211   5
  -3   1   9 5418.42 226.293   5
  -3   1  10 586.117 104.476   5
  -3   1  10 457.695 63.2647   6
  -3   1  11 1798.29 155.806   5
  -3   1  11 1536.21 123.232   6
  -3   1  12 5696.05 285.771   5
  -3   1  12 5966.23 247.307   6
  -3   1  13 3683.19 209.265   6
  -3   1  14-26.2490 76.9739   6
  -3   2  -7 22117.0 593.488   6
  -3   2  -6 483.721 97.5751   6
  -3   2  -5 9269.98 348.628   6
  -3   2  -4 38799.8 683.188   6
  -3   2  -3 30420.0 567.444   6
  -3   2   3-40.8854 63.5523   5
  -3   2   4 5722.84 206.654   5
  -3   2   5 28320.5 485.278   5
  -3   2   6 27825.0 487.573   5
  -3   2   7 149.712 63.1623   5
  -3   2   8 1853.80 142.406   5
  -3   2   9 15003.6 403.089   5
  -3   2  10 8492.93 327.495   5
  -3   2  11 532.288 109.259   5
  -3   2  11 326.755 58.8671   6
  -3   2  12 914.797 91.9180   6
  -3   2  13 3152.22 180.008   6
  -3   3  -7 39921.8 825.223   6
  -3   3  -6 41478.2 801.785   6
  -3   3  -5 20756.6 531.058   6
  -3   3  -4 5800.90 267.162   6
  -3   3  -3 21756.0 484.784   6
  -3   3  -2 70401.6 870.159   6
  -3   3  -1 85792.0 921.349   6
  -3   3   0 6859.36 210.903   6
  -3   3   3 31080.8 540.344   5
  -3   3   4 23059.5 466.790   5
  -3   3   5 346.620 74.2027   5
  -3   3   6 12607.0 353.294   5
  -3   3   7 32907.8 606.419   5
  -3   3   8 5942.13 268.094   5
  -3   3   9 696.670 105.135   5
  -3   3  10 100.198 80.2134   5
  -3   3  11 2815.09 216.647   5
  -3   3  12 467.041 59.3285   6
  -3   4  -6 3149.19 223.272   6
  -3   4  -5 20206.1 537.715   6
  -3   4  -4 26435.5 583.826   6
  -3   4  -3 3941.11 216.876   6
  -3   4  -2 30.3074 59.1336   6
  -3   4  -1 11149.9 310.266   6
  -3   4   0 98047.4 932.101   6
  -3   4   1 18178.8 321.167   6
  -3   4   2 7215.58 276.196   5
  -3   4   3 6715.71 266.139   5
  -3   4   4 14383.7 397.794   5
  -3   4   5 7410.50 288.528   5
  -3   4   6 2785.23 185.249   5
  -3   4   7 978.480 117.722   5
  -3   4   8 8149.08 336.356   5
  -3   4   9 7798.88 350.159   5
  -3   5  -5 7752.37 347.213   6
  -3   5  -4 53.3877 65.6087   6
  -3   5  -3 2196.12 177.193   6
  -3   5  -2 16747.6 436.872   6
  -3   5  -1 20782.7 455.902   6
  -3   5   0 11060.2 303.991   6
  -3   5   1 11997.9 290.980   6
  -3   5   2 4918.53 245.121   5
  -3   5   2 4518.46 148.776   6
  -3   5   3 3334.78 199.026   5
  -3   5   3 2957.28 99.1416   6
  -3   5   4 2003.92 164.196   5
  -3   5   5 2736.33 191.290   5
  -3   5   6 5940.00 283.284   5
  -3   5   7 4308.48 247.157   5
  -3   6  -4 10321.5 392.238   6
  -3   6  -3 2084.48 175.653   6
  -3   6  -2 225.277 71.6785   6
  -3   6  -1 2555.03 165.556   6
  -3   6   0 4537.22 205.518   6
  -3   6   1 6887.77 229.948   6
  -3   6   2 1353.02 136.158   5
  -3   6   2 1346.48 91.4515   6
  -3   6   3 6167.81 171.068   6
  -3   6   3 6182.51 292.316   5
  -3   6   4 6708.00 146.680   6
  -3   6   4 7603.86 326.337   5
  -3   7  -4 4304.40 271.920   6
  -3   7  -3 7480.27 333.234   6
  -3   7  -2 7217.25 310.643   6
  -3   7  -1 604.411 96.4698   6
  -3   7   0 1059.26 112.376   6
  -3   7   1 7257.39 255.117   6
  -3   7   2 9218.85 267.017   6
  -3   7   3 1657.79 102.713   6
  -3   7   4 2872.72 119.833   6
  -3   7   5 3667.32 109.119   6
  -3   8  -2 6483.13 305.193   6
  -3   8  -1 9664.03 353.264   6
  -3   8   0 8655.81 319.024   6
  -3   8   1 299.624 66.8897   6
  -3   8   2 2101.23 141.823   6
  -3   8   3 9151.92 268.955   6
  -3   8   4 10733.9 266.553   6
  -3   8   5 3301.65 135.639   6
  -3   8   6 474.337 44.4992   6
  -3   9  -1 109.050 79.0042   6
  -3   9   0 3120.78 206.500   6
  -3   9   1 14536.5 415.933   6
  -3   9   2 14502.7 394.078   6
  -3   9   3 2087.62 148.080   6
  -3   9   4 767.759 67.4789   6
  -3   9   5 6061.37 212.652   6
  -3   9   6 4951.10 171.907   6
  -3   9   7 1423.65 73.8261   6
  -3  10   0 7317.96 323.603   6
  -3  10   1-235.521 131.068   6
  -3  10   2 11221.3 374.424   6
  -3  10   3 13040.4 391.238   6
  -3  10   4 9320.11 312.703   6
  -3  10   5 653.429 87.8335   6
  -3  11   2 4425.62 254.424   6
  -3  11   3 183.513 75.2695   6
  -2 -16   6 1260.01 216.446   5
  -2 -16   7 951.262 200.575   5
  -2 -15   5 2888.36 305.721   5
  -2 -15   6 11356.4 564.122   5
  -2 -15   7 9769.52 505.910   5
  -2 -15   8 1230.13 212.995   5
  -2 -14   4 15855.1 650.633   5
  -2 -14   5 4776.45 351.036   5
  -2 -14   6 310.365 147.794   5
  -2 -14   7 4710.57 333.068   5
  -2 -14   8 8442.84 435.294   5
  -2 -14   9 6629.99 388.502   5
  -2 -13   3 3516.27 308.476   5
  -2 -13   4 1715.37 208.264   5
  -2 -13   5 9769.98 451.943   5
  -2 -13   6 12385.0 506.456   5
  -2 -13   7 5760.53 343.214   5
  -2 -13   8 137.817 116.601   5
  -2 -13   9 3636.53 271.641   5
  -2 -13  10 6931.29 377.686   5
  -2 -12   3 12701.4 520.452   5
  -2 -12   4 4095.63 288.015   5
  -2 -12   5 1734.34 193.922   5
  -2 -12   6 389.720 132.732   5
  -2 -12   7 7847.97 374.846   5
  -2 -12   8 8034.88 379.289   5
  -2 -12   9 1058.16 164.412   5
  -2 -12  10 962.570 156.452   5
  -2 -11   2 6514.01 364.493   5
  -2 -11   3 261.843 107.604   5
  -2 -11   4 9008.44 390.818   5
  -2 -11   5 23290.3 620.492   5
  -2 -11   6 10659.6 414.472   5
  -2 -11   7 2194.54 196.234   5
  -2 -11   8 1773.04 178.910   5
  -2 -11   9 6577.41 317.664   5
  -2 -11  10 4480.83 267.701   5
  -2 -11  11 379.858 101.814   5
  -2 -10   2 5060.41 303.768   5
  -2 -10   3 6194.91 306.038   5
  -2 -10   4 3599.35 237.896   5
  -2 -10   5 1150.69 145.473   5
  -2 -10   6 569.842 128.547   5
  -2 -10   7 6593.03 300.622   5
  -2 -10   8 11942.1 400.985   5
  -2 -10   9 2251.67 180.600   5
  -2 -10  10 1893.75 176.364   5
  -2 -10  11 9079.41 374.048   5
  -2  -9   2 12027.1 420.702   5
  -2  -9   3 365.845 88.9999   5
  -2  -9   4 21173.9 513.968   5
  -2  -9   5 21900.4 518.938   5
  -2  -9   6 4141.36 224.589   5
  -2  -9   7 320.690 82.9664   5
  -2  -9   8 11182.8 370.114   5
  -2  -9   9 15267.8 440.893   5
  -2  -9  10 9114.05 343.794   5
  -2  -9  11 655.739 109.181   5
  -2  -9  12 2855.45 278.395   6
  -2  -9  12 2718.26 199.301   5
  -2  -9  13 6369.45 431.662   6
  -2  -9  14 3519.57 327.128   6
  -2  -9  15 3164.74 334.412   6
  -2  -8   2 15070.6 435.984   5
  -2  -8   3 27169.4 557.264   5
  -2  -8   4 3517.67 198.023   5
  -2  -8   5 2002.57 151.535   5
  -2  -8   6 16280.2 405.272   5
  -2  -8   7 8823.79 304.620   5
  -2  -8   8 12494.5 367.434   5
  -2  -8   9 1250.61 176.883   6
  -2  -8   9 1086.92 123.087   5
  -2  -8  10 9712.11 471.368   6
  -2  -8  10 9349.21 328.460   5
  -2  -8  11 17079.2 632.567   6
  -2  -8  11 16071.9 439.972   5
  -2  -8  12 8242.61 326.492   5
  -2  -8  12 8709.35 467.891   6
  -2  -8  13 709.493 154.285   6
  -2  -8  14 1090.36 191.322   6
  -2  -8  15 3638.32 336.044   6
  -2  -8  16 6278.85 448.815   6
  -2  -8  17 2909.31 326.902   6
  -2  -7   2 2092.73 157.098   5
  -2  -7   3 17127.5 398.131   5
  -2  -7   4 41660.2 621.653   5
  -2  -7   5 26584.0 480.744   5
  -2  -7   6 2222.32 147.725   5
  -2  -7   7 10501.9 303.644   5
  -2  -7   8 6979.47 254.500   5
  -2  -7   8 6817.14 351.675   6
  -2  -7   9 29429.9 547.703   5
  -2  -7   9 30234.2 765.086   6
  -2  -7  10 8980.72 304.825   5
  -2  -7  10 9772.78 450.366   6
  -2  -7  11 136.539 101.432   6
  -2  -7  11 80.8615 73.6563   5
  -2  -7  12 1942.57 151.209   5
  -2  -7  12 2421.43 254.608   6
  -2  -7  13 10643.7 530.212   6
  -2  -7  13 9119.28 338.348   5
  -2  -7  14 7007.03 447.761   6
  -2  -7  15 770.898 175.388   6
  -2  -7  16 292.858 136.235   6
  -2  -7  17 2197.00 268.072   6
  -2  -7  18 2967.37 328.156   6
  -2  -6   2 76873.7 878.741   5
  -2  -6   3 51709.1 648.482   5
  -2  -6   4 5398.81 196.180   5
  -2  -6   5 19013.5 365.362   5
  -2  -6   6 62987.8 716.165   5
  -2  -6   7 38545.8 555.221   5
  -2  -6   7 39480.8 795.136   6
  -2  -6   8 85.3472 48.9056   5
  -2  -6   8 174.581 92.2137   6
  -2  -6   9 228.118 47.8418   5
  -2  -6   9 252.726 89.3006   6
  -2  -6  10 10617.4 454.547   6
  -2  -6  10 8955.86 286.850   5
  -2  -6  11 15638.6 567.149   6
  -2  -6  11 13874.8 380.321   5
  -2  -6  12 4580.47 326.313   6
  -2  -6  12 3969.81 210.289   5
  -2  -6  13 359.425 127.675   6
  -2  -6  14 1559.54 211.203   6
  -2  -6  15 4851.52 371.658   6
  -2  -6  16 3351.17 325.394   6
  -2  -6  17 649.002 174.276   6
  -2  -6  18 34.7148 160.556   6
  -2  -5   3 53354.7 588.482   5
  -2  -5   4 49685.7 543.085   5
  -2  -5   5 14770.1 282.290   5
  -2  -5   6 1101.34 130.321   6
  -2  -5   6 1133.04 85.8397   5
  -2  -5   7 5428.72 278.343   6
  -2  -5   7 5032.60 176.509   5
  -2  -5   8 22628.7 591.931   6
  -2  -5   8 21384.9 395.960   5
  -2  -5   9 13385.3 469.764   6
  -2  -5  10 5777.99 321.073   6
  -2  -5  11 104.072 88.7104   6
  -2  -5  12 9016.35 434.134   6
  -2  -5  13 5814.59 369.726   6
  -2  -5  14 1220.04 192.050   6
  -2  -5  15-29.6847 127.565   6
  -2  -5  16 1985.39 245.919   6
  -2  -5  17 4846.48 389.205   6
  -2  -5  18 3214.55 333.683   6
  -2  -4   3 38545.6 408.855   5
  -2  -4   4 3360.70 109.007   5
  -2  -4   5 7538.55 169.071   5
  -2  -4   6 28829.2 586.768   6
  -2  -4   6 26959.9 363.756   5
  -2  -4   7 11528.4 385.697   6
  -2  -4   8 276.165 87.2020   6
  -2  -4   9 6809.22 322.389   6
  -2  -4  10 4113.26 260.696   6
  -2  -4  11 4261.62 277.146   6
  -2  -4  12 2823.22 247.101   6
  -2  -4  13 775.827 153.355   6
  -2  -4  14 3060.33 274.984   6
  -2  -4  15 3160.49 290.980   6
  -2  -4  16 572.433 157.667   6
  -2  -4  17 356.677 160.212   6
  -2  -4  18 2544.19 300.520   6
  -2  -3   4 54224.6 416.164   5
  -2  -3   5 17150.8 391.118   6
  -2  -3   5 16111.4 221.186   5
  -2  -3   6 334.455 73.6061   6
  -2  -3   7 7527.70 294.254   6
  -2  -3   8 14821.1 429.808   6
  -2  -3   9 15740.7 464.560   6
  -2  -3  10 4374.04 264.355   6
  -2  -3  11 4568.87 285.588   6
  -2  -3  12 12346.8 472.942   6
  -2  -3  13 9108.79 429.887   6
  -2  -3  14 219.311 117.817   6
  -2  -3  15 775.556 156.113   6
  -2  -3  16 3095.08 293.097   6
  -2  -3  17 4563.92 357.719   6
  -2  -2   5 18859.7 391.038   6
  -2  -2   6 1835.02 133.830   6
  -2  -2   7 1190.08 118.924   6
  -2  -2   8 5105.75 241.122   6
  -2  -2   9 7609.86 307.631   6
  -2  -2  10 13375.1 424.054   6
  -2  -2  11 6209.95 312.286   6
  -2  -2  12 31.3883 86.4215   6
  -2  -2  13 6602.32 349.439   6
  -2  -2  14 7208.83 382.107   6
  -2  -2  15 5518.24 358.836   6
  -2  -2  16 165.492 122.883   6
  -2  -2  17 1948.19 243.604   6
  -2  -1   4 19241.0 215.577   5
  -2  -1   5 2135.02 118.888   6
  -2  -1   6 14422.7 329.352   6
  -2  -1   7 9597.55 289.618   6
  -2  -1   8 7299.71 266.016   6
  -2  -1   9 323.412 93.4078   6
  -2  -1  10 615.944 101.039   6
  -2  -1  11 12652.1 410.721   6
  -2  -1  12 9180.16 369.978   6
  -2  -1  13 4095.36 263.752   6
  -2  -1  14 450.190 130.684   6
  -2  -1  15 3879.43 291.097   6
  -2  -1  16 6208.40 371.641   6
  -2  -1  17 3180.61 292.304   6
  -2   0   3 2702.67 90.8373   5
  -2   0   4 17016.9 245.604   5
  -2   0   5 25421.5 364.234   6
  -2   0   5 25855.4 354.278   5
  -2   0   6 18190.0 354.470   5
  -2   0   6 22364.3 363.699   6
  -2   0   7 7956.25 239.832   6
  -2   0   8 6809.63 238.449   6
  -2   0   9 15190.9 378.331   6
  -2   0  10 11113.4 344.286   6
  -2   0  11 1618.18 151.436   6
  -2   0  12 3278.44 214.260   6
  -2   0  13 11834.7 415.617   6
  -2   0  14 11295.5 432.509   6
  -2   0  15 3243.37 262.214   6
  -2   0  16 300.089 116.563   6
  -2   1  -8 2275.40 196.926   6
  -2   1  -7 10287.1 376.264   6
  -2   1  -6 36078.9 672.914   6
  -2   1  -5 6685.35 270.651   6
  -2   1  -4 43.1026 60.4348   6
  -2   1  -3 5679.51 228.643   6
  -2   1   2 21581.9 317.740   5
  -2   1   3 20933.2 319.740   5
  -2   1   4 1816.66 99.8518   5
  -2   1   5 6636.41 152.518   6
  -2   1   5 6920.89 201.477   5
  -2   1   6 40851.3 560.400   5
  -2   1   6 41827.9 459.885   6
  -2   1   7 29917.3 424.264   6
  -2   1   7 29381.8 513.177   5
  -2   1   8 11553.7 362.748   5
  -2   1   8 12746.4 301.978   6
  -2   1   9 459.538 86.3578   6
  -2   1  10 265.837 78.6204   6
  -2   1  11 6088.26 261.078   6
  -2   1  12 3585.60 213.611   6
  -2   1  13 835.733 121.539   6
  -2   1  14-55.1707 77.8533   6
  -2   1  15 3218.52 241.227   6
  -2   2  -8 19239.1 552.978   6
  -2   2  -7 3893.89 238.166   6
  -2   2  -6 107.171 72.3867   6
  -2   2  -5 9870.15 333.518   6
  -2   2  -4 39746.4 640.093   6
  -2   2  -3 44985.2 643.805   6
  -2   2  -2 10522.1 275.988   6
  -2   2  -1 211893. 1470.29   6
  -2   2   0 560771. 3112.20   6
  -2   2   1 22876.6 386.369   5
  -2   2   2 51.2100 41.5319   5
  -2   2   3 3355.65 146.104   5
  -2   2   4 21649.1 391.036   5
  -2   2   5 40326.4 552.496   5
  -2   2   5 33032.9 301.371   6
  -2   2   6 19805.9 264.165   6
  -2   2   6 20029.3 412.145   5
  -2   2   7 384.757 75.4265   5
  -2   2   7 520.866 56.5566   6
  -2   2   8 15871.1 417.785   5
  -2   2   8 15719.5 303.687   6
  -2   2   9 31634.3 643.012   5
  -2   2   9 30471.2 476.753   6
  -2   2  10 14610.6 351.153   6
  -2   2  10 14162.9 460.794   5
  -2   2  11 728.423 120.226   5
  -2   2  11 1555.12 145.111   6
  -2   2  12 3106.22 192.200   6
  -2   2  13 12875.6 395.703   6
  -2   2  14 6029.89 291.410   6
  -2   2  15 772.640 137.748   6
  -2   3  -7 59016.3 967.044   6
  -2   3  -6 45728.4 797.427   6
  -2   3  -5 6231.18 275.265   6
  -2   3  -4 2659.89 173.799   6
  -2   3  -3 17335.6 408.951   6
  -2   3  -2 22184.7 426.112   6
  -2   3  -1 8986.35 240.576   6
  -2   3   0 17148.9 298.083   6
  -2   3   1 37378.8 400.721   6
  -2   3   1 38180.1 561.320   5
  -2   3   2 48644.0 638.940   5
  -2   3   2 44597.5 384.443   6
  -2   3   3 35145.9 543.018   5
  -2   3   4 5729.03 222.990   5
  -2   3   5 7032.36 246.669   5
  -2   3   6 23425.3 257.764   6
  -2   3   6 28012.7 523.916   5
  -2   3   7 16569.7 251.570   6
  -2   3   7 17946.4 443.374   5
  -2   3   8 5235.72 160.111   6
  -2   3   8 5264.44 254.736   5
  -2   3   9 46.4820 64.1350   5
  -2   3   9 33.1804 42.9126   6
  -2   3  10 1933.58 185.207   5
  -2   3  10 2279.27 133.161   6
  -2   3  11 9922.67 294.389   6
  -2   3  12 4307.44 210.631   6
  -2   3  13 1031.50 122.277   6
  -2   3  14 245.981 84.2661   6
  -2   4  -7 10805.9 419.717   6
  -2   4  -6 29886.3 665.264   6
  -2   4  -5 42136.9 757.525   6
  -2   4  -4 56886.4 846.639   6
  -2   4  -3 27605.8 532.646   6
  -2   4  -2 382.967 79.5806   6
  -2   4  -1 34183.2 512.426   6
  -2   4   0 66988.1 699.645   6
  -2   4   1 30607.1 537.606   5
  -2   4   1 30282.5 401.525   6
  -2   4   2 57.6244 31.7083   6
  -2   4   2 51.5203 52.6658   5
  -2   4   3 6908.76 134.971   6
  -2   4   3 7989.27 274.545   5
  -2   4   4 15715.5 394.401   5
  -2   4   5 20096.3 468.583   5
  -2   4   6 9531.70 152.971   6
  -2   4   6 12381.0 364.568   5
  -2   4   7 351.348 36.5653   6
  -2   4   7 439.154 96.7752   5
  -2   4   8 10211.8 211.672   6
  -2   4   8 11562.4 395.579   5
  -2   4   9 9448.98 381.622   5
  -2   4   9 8788.57 218.859   6
  -2   4  10 4225.22 168.264   6
  -2   4  11 857.131 91.2620   6
  -2   4  12 5909.93 225.699   6
  -2   4  13 9170.86 300.946   6
  -2   5  -6 30391.4 695.930   6
  -2   5  -5 146.572 71.1809   6
  -2   5  -4 14611.0 427.211   6
  -2   5  -3 36853.8 654.607   6
  -2   5  -2 44928.8 682.383   6
  -2   5  -1 16843.0 377.407   6
  -2   5   0 343.583 61.4960   6
  -2   5   0 276.564 68.5707   5
  -2   5   1 17433.3 432.131   5
  -2   5   1 17493.7 328.631   6
  -2   5   2 35137.9 629.042   5
  -2   5   2 36070.2 446.245   6
  -2   5   3 12751.3 375.507   5
  -2   5   3 13286.4 234.758   6
  -2   5   4 272.965 82.4667   5
  -2   5   4 399.427 46.4306   6
  -2   5   5 5225.36 127.574   6
  -2   5   5 6454.15 281.265   5
  -2   5   6 13744.6 221.185   6
  -2   5   6 15424.6 440.794   5
  -2   5   7 11229.9 390.942   5
  -2   5   7 10481.2 200.829   6
  -2   5   8 2859.07 112.224   6
  -2   5   9 688.891 58.5774   6
  -2   5  10 5422.54 178.679   6
  -2   5  11 4904.33 186.172   6
  -2   5  12 8393.23 258.850   6
  -2   5  13 535.180 82.3972   6
  -2   6  -5 48357.1 869.652   6
  -2   6  -4 28295.2 627.747   6
  -2   6  -3 2397.42 176.862   6
  -2   6  -2 11162.8 349.261   6
  -2   6  -1 14978.4 383.041   6
  -2   6   0 13346.1 406.521   5
  -2   6   0 13083.6 332.326   6
  -2   6   1 6064.90 212.883   6
  -2   6   1 5752.43 262.459   5
  -2   6   2 471.352 76.5631   6
  -2   6   2 378.357 70.6527   5
  -2   6   3 4757.34 162.618   6
  -2   6   3 4651.85 245.094   5
  -2   6   4 17660.5 479.621   5
  -2   6   4 18730.1 307.974   6
  -2   6   5 18304.2 500.339   5
  -2   6   5 18304.5 289.364   6
  -2   6   6 3950.67 257.876   5
  -2   6   6 3201.03 117.174   6
  -2   6   7 2054.21 98.5912   6
  -2   6   8 8461.34 208.338   6
  -2   6   9 4223.12 153.090   6
  -2   6  10 309.497 47.1333   6
  -2   6  11 909.898 80.8405   6
  -2   6  12 258.070 50.6473   6
  -2   7  -4 23144.0 593.768   6
  -2   7  -3 22307.6 554.287   6
  -2   7  -2 19956.6 499.483   6
  -2   7  -1 172.344 71.8838   6
  -2   7   0 2125.41 151.619   6
  -2   7   0 2124.10 170.580   5
  -2   7   1 16075.5 471.391   5
  -2   7   1 16630.4 388.626   6
  -2   7   2 12251.6 418.280   5
  -2   7   2 13046.7 322.219   6
  -2   7   3 1426.91 107.730   6
  -2   7   4 2217.19 124.153   6
  -2   7   5 2332.94 121.782   6
  -2   7   6 10113.8 239.826   6
  -2   7   7 1384.66 89.5805   6
  -2   7   8 21.7857 38.4272   6
  -2   7   9 3412.67 148.253   6
  -2   7  10 4160.91 162.586   6
  -2   7  11 1732.89 109.790   6
  -2   8  -3 5.37400 76.6230   6
  -2   8  -2 7196.64 316.062   6
  -2   8  -1 19820.2 504.768   6
  -2   8   0 9804.30 339.632   6
  -2   8   1 580.813 96.8500   6
  -2   8   2 6570.54 253.079   6
  -2   8   3 11609.5 318.968   6
  -2   8   4 10959.6 298.131   6
  -2   8   5 187.716 58.3119   6
  -2   8   6 313.092 65.1287   6
  -2   8   7 5728.49 195.974   6
  -2   8   8 3598.71 153.073   6
  -2   8   9 525.342 66.9571   6
  -2   8   9 256.845 46.9686   6
  -2   8  10 198.128 45.8491   6
  -2   9  -1 231.326 79.1393   6
  -2   9   0 9229.06 352.459   6
  -2   9   1 11357.6 369.330   6
  -2   9   2 2346.07 164.984   6
  -2   9   3 2730.44 168.135   6
  -2   9   4 6037.09 244.769   6
  -2   9   5 9241.60 291.784   6
  -2   9   6 3639.28 184.867   6
  -2   9   7 1288.94 110.235   6
  -2   9   8 1232.26 109.998   6
  -2   9   9 7175.86 235.505   6
  -2   9  10 6193.44 216.665   6
  -2  10   1 696.339 115.852   6
  -2  10   2 9394.47 344.458   6
  -2  10   3 11387.3 365.781   6
  -2  10   4 4366.14 231.901   6
  -2  10   5 625.310 103.815   6
  -2  10   6 10037.0 317.320   6
  -2  10   7 8046.53 279.261   6
  -2  11   3 741.440 119.799   6
  -2  11   4 8297.20 327.364   6
  -2  11   5 8239.42 326.002   6
  -1 -18   5 3177.58 387.973   5
  -1 -18   6 673.466 229.673   5
  -1 -18   7 311.796 194.890   5
  -1 -17   4-254.407 220.056   5
  -1 -17   5 886.422 199.771   5
  -1 -17   6 3755.21 379.957   5
  -1 -17   7 1874.51 278.674   5
  -1 -17   8 170.249 178.191   5
  -1 -16   3 3561.13 373.431   5
  -1 -16   4 4784.09 400.717   5
  -1 -16   5 1541.68 254.777   5
  -1 -16   6-37.4542 141.304   5
  -1 -16   7 3671.68 349.546   5
  -1 -16   8 4770.69 386.845   5
  -1 -16   9 5705.46 423.644   5
  -1 -15   2 6715.12 475.823   5
  -1 -15   3 758.473 189.711   5
  -1 -15   4 425.571 173.133   5
  -1 -15   5 4983.75 370.861   5
  -1 -15   6 6021.91 413.815   5
  -1 -15   7 2381.73 271.760   5
  -1 -15   8 802.214 177.650   5
  -1 -15   9 2864.87 297.147   5
  -1 -15  10 7377.03 452.226   5
  -1 -14   1 1917.79 255.338   5
  -1 -14   2 5012.79 378.081   5
  -1 -14   3 19200.4 698.620   5
  -1 -14   4 14048.8 595.296   5
  -1 -14   5 1080.63 181.984   5
  -1 -14   6 2247.79 256.145   5
  -1 -14   7 6882.60 411.656   5
  -1 -14   8 7850.91 441.840   5
  -1 -14   9 2062.68 226.652   5
  -1 -14  10 56.8149 112.853   5
  -1 -14  11 3855.20 313.363   5
  -1 -13   1 16351.6 662.261   5
  -1 -13   2 4402.72 335.924   5
  -1 -13   3 2737.55 260.996   5
  -1 -13   4 12422.7 530.065   5
  -1 -13   5 19632.4 655.927   5
  -1 -13   6 17031.7 611.056   5
  -1 -13   7 4377.03 308.096   5
  -1 -13   8 1030.77 179.279   5
  -1 -13   9 10444.0 479.719   5
  -1 -13  10 9946.89 471.473   5
  -1 -13  11 4036.80 305.119   5
  -1 -12   0 2809.52 290.647   5
  -1 -12   1-48.1817 118.893   5
  -1 -12   2 2824.72 253.675   5
  -1 -12   3 16280.6 575.241   5
  -1 -12   4 6714.31 370.992   5
  -1 -12   5 411.106 137.341   5
  -1 -12   6 1321.59 183.507   5
  -1 -12   7 12842.0 497.086   5
  -1 -12   8 8837.46 411.480   5
  -1 -12   9 2430.85 226.742   5
  -1 -12  10 877.563 170.601   5
  -1 -12  11 6551.56 388.362   5
  -1 -12  12 7276.18 412.204   5
  -1 -11   0 23154.5 727.198   5
  -1 -11   1 28309.2 746.108   5
  -1 -11   2 14613.7 524.593   5
  -1 -11   3 140.287 103.343   5
  -1 -11   4 17327.9 559.362   5
  -1 -11   5 29102.7 713.332   5
  -1 -11   6 13112.0 470.634   5
  -1 -11   7 10146.2 422.710   5
  -1 -11   8 1547.40 188.420   5
  -1 -11   9 8979.86 412.302   5
  -1 -11  10 9352.37 424.489   5
  -1 -11  10 9930.36 533.222   6
  -1 -11  11 1732.57 201.924   5
  -1 -11  11 1709.09 231.447   6
  -1 -11  12 195.254 128.355   6
  -1 -11  12 207.109 103.682   5
  -1 -11  13 3232.70 331.434   6
  -1 -11  14 6686.36 479.913   6
  -1 -11  15 3442.42 341.556   6
  -1 -10   0 5614.12 331.878   5
  -1 -10   1 2201.42 205.556   5
  -1 -10   2 14168.8 477.573   5
  -1 -10   3 16446.3 512.026   5
  -1 -10   4 5929.57 308.666   5
  -1 -10   5 154.285 89.6979   5
  -1 -10   6 6194.86 316.768   5
  -1 -10   7 1698.57 185.586   5
  -1 -10   8 12543.3 544.169   6
  -1 -10   8 12244.4 449.899   5
  -1 -10   9 563.531 129.918   6
  -1 -10   9 843.004 148.628   5
  -1 -10  10 2422.44 260.604   6
  -1 -10  10 2278.88 209.184   5
  -1 -10  11 9908.61 425.190   5
  -1 -10  11 10492.2 541.061   6
  -1 -10  12 4428.52 360.025   6
  -1 -10  12 4523.95 293.331   5
  -1 -10  13 65.2864 99.6954   5
  -1 -10  13-96.3527 150.965   6
  -1 -10  14 1725.75 259.727   6
  -1 -10  15 4626.88 412.690   6
  -1 -10  16 2194.66 313.439   6
  -1  -9   0 10292.1 408.932   5
  -1  -9   1 20274.6 553.458   5
  -1  -9   2 4811.96 268.057   5
  -1  -9   3 1487.29 152.685   5
  -1  -9   4 7804.63 325.275   5
  -1  -9   5 12850.9 427.801   5
  -1  -9   6 2268.68 193.612   5
  -1  -9   7 4060.86 291.563   6
  -1  -9   7 4164.44 249.449   5
  -1  -9   8 3351.29 269.868   6
  -1  -9   8 3316.74 233.198   5
  -1  -9   9 16519.7 624.125   6
  -1  -9   9 16612.8 506.149   5
  -1  -9  10 5116.80 288.369   5
  -1  -9  10 6011.51 386.030   6
  -1  -9  11 81.5840 111.640   6
  -1  -9  11 57.0440 78.7388   5
  -1  -9  12 5142.89 394.283   6
  -1  -9  12 4597.18 290.478   5
  -1  -9  13 5303.15 311.937   5
  -1  -9  13 5443.81 402.283   6
  -1  -9  14 1581.99 253.299   6
  -1  -9  14 1306.40 164.175   5
  -1  -9  15 229.078 157.772   6
  -1  -9  16 1114.80 226.195   6
  -1  -9  17 5085.92 454.044   6
  -1  -8  -1 739.785 118.021   5
  -1  -8   0 5538.71 282.941   5
  -1  -8   1 6157.10 286.404   5
  -1  -8   2 28211.0 594.553   5
  -1  -8   3 21155.4 502.970   5
  -1  -8   4 53.2728 70.6483   5
  -1  -8   5 10131.2 351.767   5
  -1  -8   5 10066.1 414.219   6
  -1  -8   6 11851.6 456.712   6
  -1  -8   6 12200.5 386.718   5
  -1  -8   7 8076.81 321.035   5
  -1  -8   7 8009.14 398.796   6
  -1  -8   8 215.275 79.7367   5
  -1  -8   8 208.729 101.704   6
  -1  -8   9 1935.17 220.477   6
  -1  -8   9 1655.71 157.545   5
  -1  -8  10 10072.9 482.870   6
  -1  -8  10 9446.44 375.102   5
  -1  -8  11 16321.7 505.963   5
  -1  -8  11 17719.1 658.905   6
  -1  -8  12 2437.41 201.326   5
  -1  -8  12 2783.84 282.351   6
  -1  -8  13 595.616 102.824   5
  -1  -8  13 853.801 196.387   6
  -1  -8  14 5262.48 403.245   6
  -1  -8  14 4310.11 286.332   5
  -1  -8  15 6285.28 459.060   6
  -1  -8  16 5349.03 446.524   6
  -1  -8  17 455.992 182.027   6
  -1  -8  18 1734.71 282.777   6
  -1  -7   0 25130.8 550.451   5
  -1  -7   1 686.606 105.801   5
  -1  -7   2 310.699 80.8292   5
  -1  -7   3 14585.7 381.529   5
  -1  -7   4 29035.1 550.792   5
  -1  -7   5 11519.0 418.893   6
  -1  -7   5 10957.6 337.865   5
  -1  -7   6 113.400 67.7778   5
  -1  -7   6 117.051 82.1392   6
  -1  -7   7 12705.0 469.701   6
  -1  -7   7 12308.6 374.638   5
  -1  -7   8 14671.4 522.050   6
  -1  -7   8 14591.6 421.147   5
  -1  -7   9 9674.33 442.238   6
  -1  -7   9 8652.53 331.389   5
  -1  -7  10 1506.18 202.236   6
  -1  -7  10 1227.51 136.307   5
  -1  -7  11 806.317 170.495   6
  -1  -7  11 486.084 86.3491   5
  -1  -7  12 6390.50 319.390   5
  -1  -7  12 7473.39 433.805   6
  -1  -7  13 10263.7 525.423   6
  -1  -7  14 2285.55 276.235   6
  -1  -7  15 108.869 134.424   6
  -1  -7  16 3040.92 331.448   6
  -1  -7  17 5263.53 449.295   6
  -1  -7  18 3826.52 392.278   6
  -1  -7  19-11.2819 162.604   6
  -1  -6   0 13555.1 369.680   5
  -1  -6   1 50937.4 709.299   5
  -1  -6   2 14823.8 353.131   5
  -1  -6   3 4720.27 222.077   5
  -1  -6   4 2521.72 185.122   6
  -1  -6   4 2489.83 151.222   5
  -1  -6   5 28322.8 630.791   6
  -1  -6   5 27888.7 508.779   5
  -1  -6   6 20762.2 556.798   6
  -1  -6   6 20593.3 445.941   5
  -1  -6   7 8914.05 381.998   6
  -1  -6   7 8293.30 289.492   5
  -1  -6   8 117.537 86.5770   6
  -1  -6   8-20.9764 69.5561   5
  -1  -6   9 5048.24 316.753   6
  -1  -6  10 32500.0 811.962   6
  -1  -6  11 18513.8 633.677   6
  -1  -6  12 489.155 132.091   6
  -1  -6  13 3699.42 313.572   6
  -1  -6  14 9386.15 508.979   6
  -1  -6  15 9732.95 539.240   6
  -1  -6  16 2429.06 307.009   6
  -1  -6  17-155.209 169.997   6
  -1  -6  18 1259.54 233.952   6
  -1  -6  19 8167.17 558.194   6
  -1  -5   0 21152.3 423.377   5
  -1  -5   1 2167.35 133.487   5
  -1  -5   2 3973.53 166.333   5
  -1  -5   3 18840.0 363.407   5
  -1  -5   3 18596.7 442.934   6
  -1  -5   4 26102.7 550.220   6
  -1  -5   4 25313.7 434.253   5
  -1  -5   5 27251.9 580.913   6
  -1  -5   5 26315.1 456.186   5
  -1  -5   6 972.954 137.734   6
  -1  -5   6 774.652 88.6726   5
  -1  -5   7 23204.6 586.315   6
  -1  -5   8 32078.3 713.898   6
  -1  -5   9 15561.7 519.028   6
  -1  -5  10 540.178 142.618   6
  -1  -5  11 4975.67 329.840   6
  -1  -5  12 8744.49 443.683   6
  -1  -5  13 5815.87 376.149   6
  -1  -5  14 4325.81 341.858   6
  -1  -5  15 331.453 159.776   6
  -1  -5  16 6718.26 455.071   6
  -1  -5  17 9882.92 573.609   6
  -1  -5  18 3816.50 379.825   6
  -1  -5  19 475.307 190.946   6
  -1  -4   0 22131.7 403.148   5
  -1  -4   1 66794.5 677.289   5
  -1  -4   2 52844.3 578.527   5
  -1  -4   3 5428.90 223.387   6
  -1  -4   3 5271.08 170.469   5
  -1  -4   4 6913.42 197.821   5
  -1  -4   4 6891.12 267.979   6
  -1  -4   5 40538.0 685.779   6
  -1  -4   6 20222.7 496.057   6
  -1  -4   7 11329.1 385.415   6
  -1  -4   8 2360.95 193.856   6
  -1  -4   9 6231.87 314.940   6
  -1  -4  10 33150.9 735.474   6
  -1  -4  11 31029.5 744.006   6
  -1  -4  12 9129.63 426.381   6
  -1  -4  13 3267.94 271.632   6
  -1  -4  14 7121.88 414.019   6
  -1  -4  15 6555.61 415.762   6
  -1  -4  16 1008.01 196.572   6
  -1  -4  17 590.360 206.135   6
  -1  -4  18 2226.14 304.032   6
  -1  -4  19 3941.95 392.624   6
  -1  -3   1 833.052 66.1838   5
  -1  -3   2 21682.1 291.786   5
  -1  -3   3 82232.2 675.235   5
  -1  -3   3 82407.4 861.860   6
  -1  -3   4 87888.3 947.009   6
  -1  -3   5 31967.6 564.176   6
  -1  -3   6 681.301 112.205   6
  -1  -3   7 17228.9 454.157   6
  -1  -3   8 55715.0 871.903   6
  -1  -3   9 19729.0 530.585   6
  -1  -3  10 161.820 101.122   6
  -1  -3  11 19495.7 579.836   6
  -1  -3  12 19192.8 599.074   6
  -1  -3  13 14597.0 546.004   6
  -1  -3  14 486.052 150.674   6
  -1  -3  15 950.527 177.658   6
  -1  -3  16 4701.38 359.848   6
  -1  -3  17 6829.33 449.477   6
  -1  -3  18 1522.31 248.821   6
  -1  -3  19 223.915 155.366   6
  -1  -2   1 44343.3 367.678   5
  -1  -2   2 41676.2 491.155   6
  -1  -2   2 42551.3 348.304   5
  -1  -2   3 13673.7 292.846   6
  -1  -2   4 9471.26 259.034   6
  -1  -2   5 59949.9 741.063   6
  -1  -2   6 16698.7 395.420   6
  -1  -2   7 5960.55 253.909   6
  -1  -2   8 3237.81 198.992   6
  -1  -2   9 12627.7 400.204   6
  -1  -2  10 16124.4 480.437   6
  -1  -2  11 4883.02 290.013   6
  -1  -2  12 896.719 171.605   6
  -1  -2  13 7724.66 391.577   6
  -1  -2  14 12292.1 510.385   6
  -1  -2  15 2882.89 269.643   6
  -1  -2  16 129.730 121.424   6
  -1  -2  17 2410.66 269.730   6
  -1  -2  18 2846.43 306.763   6
  -1  -1   2 239.589 45.9910   6
  -1  -1   3 40135.0 459.636   6
  -1  -1   4 27817.7 409.937   6
  -1  -1   5 155.402 63.0761   6
  -1  -1   6 35696.7 550.382   6
  -1  -1   7 33043.5 563.537   6
  -1  -1   8 24748.0 513.396   6
  -1  -1   9 287.098 87.5051   6
  -1  -1  10 1265.50 149.274   6
  -1  -1  11 4581.54 269.075   6
  -1  -1  12 6139.32 328.127   6
  -1  -1  13 773.177 156.153   6
  -1  -1  14 619.382 152.275   6
  -1  -1  15 5491.09 354.050   6
  -1  -1  16 4287.48 326.998   6
  -1  -1  17 1424.91 210.757   6
  -1  -1  18 486.781 166.130   6
  -1   0  -9 30365.6 670.410   6
  -1   0  -8 83697.4 1101.93   6
  -1   0  -7 25635.1 547.648   6
  -1   0  -6 111.679 66.9624   6
  -1   0  -5 12638.8 334.108   6
  -1   0  -4 84231.6 879.389   6
  -1   0  -3 19413.2 351.103   6
  -1   0   2 52074.4 395.074   5
  -1   0   2 52530.0 403.064   6
  -1   0   3 6719.27 145.365   6
  -1   0   4 12356.5 229.807   6
  -1   0   5 27275.0 401.620   6
  -1   0   6 19349.7 367.179   6
  -1   0   7 3893.38 183.744   6
  -1   0   8 8114.55 276.488   6
  -1   0   9 24198.0 519.522   6
  -1   0  10 12952.0 398.800   6
  -1   0  11 445.816 106.131   6
  -1   0  12 8321.29 358.310   6
  -1   0  13 14755.2 496.947   6
  -1   0  14 5742.70 330.645   6
  -1   0  15 135.606 115.053   6
  -1   0  16 1038.72 183.971   6
  -1   0  17 2638.68 265.325   6
  -1   0  18 2787.69 281.045   6
  -1   1  -9 4382.39 262.250   6
  -1   1  -8 5935.57 286.489   6
  -1   1  -7 65125.8 916.755   6
  -1   1  -6 35581.5 624.277   6
  -1   1  -5 5771.12 231.476   6
  -1   1  -4 1017.27 105.351   6
  -1   1  -3 15900.3 325.076   6
  -1   1  -2 87337.8 756.799   6
  -1   1  -1 57039.4 510.222   6
  -1   1   0 643.815 43.6754   6
  -1   1   1 19097.3 252.641   5
  -1   1   2 44063.8 430.150   5
  -1   1   3 12680.0 171.174   6
  -1   1   3 12843.7 244.330   5
  -1   1   4 1227.78 68.6262   6
  -1   1   5 46.1859 41.2090   6
  -1   1   6 27038.0 413.329   6
  -1   1   7 55644.9 679.556   6
  -1   1   8 2343.53 145.524   6
  -1   1   9 1935.72 143.114   6
  -1   1  10 3447.42 202.812   6
  -1   1  11 5425.42 263.385   6
  -1   1  12 213.789 102.947   6
  -1   1  13 1197.92 151.255   6
  -1   1  14 4019.34 274.307   6
  -1   1  15 7493.51 382.171   6
  -1   1  16 3765.78 285.634   6
  -1   1  17 428.317 136.162   6
  -1   2  -9 25234.3 633.078   6
  -1   2  -8 15662.2 475.024   6
  -1   2  -7 15737.6 446.146   6
  -1   2  -6 7438.58 294.175   6
  -1   2  -5 21011.0 463.882   6
  -1   2  -4 18631.6 402.991   6
  -1   2  -3 171.866 63.0548   6
  -1   2  -2 11754.4 260.698   6
  -1   2  -1 27442.8 357.243   6
  -1   2   0 83411.3 627.224   6
  -1   2   1 25857.9 363.013   5
  -1   2   1 26103.8 248.156   6
  -1   2   2 3175.15 131.031   5
  -1   2   3 22340.4 370.507   5
  -1   2   4 26892.9 443.646   5
  -1   2   4 27638.2 308.497   6
  -1   2   5 6821.45 171.886   6
  -1   2   6 706.261 69.9861   6
  -1   2   7 12206.7 287.306   6
  -1   2   8 35128.2 546.252   6
  -1   2   9 13112.3 354.010   6
  -1   2  10 1155.47 119.354   6
  -1   2  11 101.120 63.3191   6
  -1   2  12 19996.9 513.501   6
  -1   2  13 13166.6 443.697   6
  -1   2  14 4080.39 269.107   6
  -1   2  15 76.0785 90.9297   6
  -1   2  16 1508.37 192.656   6
  -1   2  17 4452.90 314.358   6
  -1   3  -8 11866.8 428.397   6
  -1   3  -7 27086.5 615.910   6
  -1   3  -6 47140.1 774.238   6
  -1   3  -5 2206.79 163.648   6
  -1   3  -4 2853.34 166.494   6
  -1   3  -3 895.188 100.843   6
  -1   3  -2 4124.98 171.363   6
  -1   3  -1 1536.56 96.2004   6
  -1   3   0 44134.8 556.876   5
  -1   3   0 44231.0 474.547   6
  -1   3   1 55762.8 499.056   6
  -1   3   1 56544.7 644.123   5
  -1   3   2 1711.94 70.5152   6
  -1   3   2 1802.67 120.324   5
  -1   3   3 648.848 82.8901   5
  -1   3   4 620.142 86.0426   5
  -1   3   5 10584.9 314.978   5
  -1   3   5 10506.1 216.083   6
  -1   3   6 16534.0 453.738   5
  -1   3   6 17601.2 313.167   6
  -1   3   7 8731.73 241.844   6
  -1   3   8 711.446 82.8093   6
  -1   3   9 6835.69 247.156   6
  -1   3  10 20545.7 463.625   6
  -1   3  11 8866.76 322.237   6
  -1   3  12 14554.5 432.722   6
  -1   3  13 10.6671 91.8265   6
  -1   3  14 5428.06 298.818   6
  -1   3  15 12380.5 462.345   6
  -1   3  16 3571.61 265.815   6
  -1   4  -7 1637.56 158.393   6
  -1   4  -6 9344.59 350.129   6
  -1   4  -5 19972.6 486.827   6
  -1   4  -4 9881.72 322.311   6
  -1   4  -3 874.356 102.785   6
  -1   4  -2 4580.53 193.656   6
  -1   4  -1 1206.43 98.9040   6
  -1   4  -1 1329.83 110.925   5
  -1   4   0 8959.91 227.787   6
  -1   4   0 9026.43 269.523   5
  -1   4   1 10505.5 291.718   5
  -1   4   1 10092.4 223.181   6
  -1   4   2 10022.9 288.483   5
  -1   4   2 9971.08 206.231   6
  -1   4   3 24735.9 465.875   5
  -1   4   4 20167.3 447.154   5
  -1   4   5 35334.7 627.976   5
  -1   4   6 1139.88 123.368   5
  -1   4   7 7117.52 309.644   5
  -1   4   7 6939.00 214.473   6
  -1   4   8 21416.1 583.528   5
  -1   4   8 22809.0 427.519   6
  -1   4   9 15346.9 374.700   6
  -1   4   9 15651.3 546.607   5
  -1   4  10 2687.00 165.065   6
  -1   4  11 3809.43 210.069   6
  -1   4  12 7606.90 311.770   6
  -1   4  13 13388.7 431.062   6
  -1   4  14 4201.85 254.298   6
  -1   4  15-34.9044 105.806   6
  -1   5  -7 5570.35 303.924   6
  -1   5  -6 1533.84 156.612   6
  -1   5  -5 4718.60 250.044   6
  -1   5  -4 32335.1 627.111   6
  -1   5  -3 32265.6 588.410   6
  -1   5  -2 15122.1 378.057   6
  -1   5  -1 2370.24 154.978   5
  -1   5  -1 2420.15 145.721   6
  -1   5   0 7069.63 222.864   6
  -1   5   0 6794.77 252.484   5
  -1   5   1 30354.3 548.934   5
  -1   5   1 29971.5 443.377   6
  -1   5   2 38006.4 485.366   6
  -1   5   2 36588.8 616.310   5
  -1   5   3 8668.17 304.134   5
  -1   5   4 7071.21 295.224   5
  -1   5   5 13950.5 408.542   5
  -1   5   6 52333.2 848.628   5
  -1   5   7 22966.7 575.376   5
  -1   5   8 138.730 50.6339   6
  -1   5   8 198.127 83.7673   5
  -1   5   9 6031.44 233.277   6
  -1   5  10 13812.3 381.024   6
  -1   5  11 6290.97 268.790   6
  -1   5  12 4637.00 240.315   6
  -1   5  13-29.5212 85.8360   6
  -1   5  14 2571.65 198.521   6
  -1   5  15 5444.86 295.603   6
  -1   6  -6 17868.2 532.503   6
  -1   6  -5 38873.4 759.387   6
  -1   6  -4 9278.98 348.026   6
  -1   6  -3 3737.77 209.231   6
  -1   6  -2 26221.5 544.819   6
  -1   6  -1 47318.2 749.775   5
  -1   6  -1 47373.2 696.129   6
  -1   6   0 37976.6 665.355   5
  -1   6   0 38248.6 591.998   6
  -1   6   1 3310.66 164.195   6
  -1   6   1 3045.04 187.976   5
  -1   6   2 9886.07 267.078   6
  -1   6   2 11037.6 368.123   5
  -1   6   3 28475.0 593.465   5
  -1   6   3 27671.4 442.182   6
  -1   6   4 38312.8 707.751   5
  -1   6   5 6974.69 303.837   5
  -1   6   6 1663.53 165.186   5
  -1   6   9 9098.10 290.640   6
  -1   6  10 276.142 63.7510   6
  -1   6  11 2802.38 183.845   6
  -1   6  12 3003.85 199.005   6
  -1   6  13 5510.37 270.094   6
  -1   6  14 416.758 103.528   6
  -1   7  -4 26115.3 616.647   6
  -1   7  -3 24075.3 569.776   6
  -1   7  -2 23707.3 539.439   6
  -1   7  -1 86.0460 78.3809   5
  -1   7  -1 267.106 83.0296   6
  -1   7   0 14977.2 436.754   5
  -1   7   0 15272.8 392.296   6
  -1   7   1 42308.5 754.624   5
  -1   7   1 41428.5 633.312   6
  -1   7   2 30735.4 642.771   5
  -1   7   2 30537.3 524.751   6
  -1   7   3 5251.20 207.418   6
  -1   7   3 5254.03 267.210   5
  -1   7   4 3302.26 222.851   5
  -1   7   4 3176.46 158.153   6
  -1   7   9 7390.61 266.617   6
  -1   7  10 7912.33 290.456   6
  -1   7  11 1086.12 116.624   6
  -1   7  12-143.200 101.786   6
  -1   7  13 130.800 81.5374   6
  -1   8  -3 2547.89 197.368   6
  -1   8  -2 19766.3 520.336   6
  -1   8  -1 68878.4 1038.11   5
  -1   8  -1 67406.5 958.647   6
  -1   8   0 21740.3 566.277   5
  -1   8   0 21750.4 503.849   6
  -1   8   1 219.348 83.2745   5
  -1   8   1 179.574 72.1813   6
  -1   8   2 36404.5 619.122   6
  -1   8   3 45684.0 692.054   6
  -1   8   4 13796.6 359.047   6
  -1   8   5-55.7542 66.9395   6
  -1   8  10 613.022 89.2078   6
  -1   8  11 7112.83 289.964   6
  -1   8  12 6745.19 298.007   6
  -1   8  13 778.132 113.694   6
  -1   9  -1 128.074 83.2022   6
  -1   9   0 14579.4 440.003   6
  -1   9   1 8874.58 328.432   6
  -1   9   2 2453.91 177.140   6
  -1   9   3 742.326 106.933   6
  -1   9   4 8976.18 312.647   6
  -1   9   5 13933.8 384.277   6
  -1   9   6 4332.98 211.529   6
  -1   9  11-26.2259 89.0079   6
  -1   9  12 1173.06 124.185   6
  -1  10   1 74.1589 68.1576   6
  -1  10   2 9734.19 357.873   6
  -1  10   3 7983.91 324.594   6
  -1  10   4 1180.42 135.225   6
  -1  10   5 673.103 106.538   6
  -1  10   6 4722.16 242.956   6
  -1  10   7 2110.99 160.528   6
  -1  10  11 3007.92 191.893   6
  -1  11   5 7176.64 323.555   6
  -1  11   6 1388.52 148.039   6
  -1  11   7 920.147 124.829   6
   0 -19   4 95.9974 213.029   5
   0 -18   2 156.715 191.024   5
   0 -18   3 2562.77 344.397   5
   0 -18   4 3709.35 406.275   5
   0 -18   5 2597.02 341.719   5
   0 -18   6 285.426 215.349   5
   0 -18   7 1251.91 265.753   5
   0 -18   8 3037.97 365.575   5
   0 -18   9 4509.80 447.456   5
   0 -17   1 7855.37 590.556   5
   0 -17   2 5459.77 494.643   5
   0 -17   3 1942.97 291.142   5
   0 -17   4 209.929 167.521   5
   0 -17   5 2115.09 294.532   5
   0 -17   6 3566.83 370.721   5
   0 -17   7 2944.61 353.572   5
   0 -17   8 41.9311 159.994   5
   0 -17   9 913.776 219.668   5
   0 -17  10 3125.78 349.666   5
   0 -16   1 2203.61 307.067   5
   0 -16   2 1337.72 235.989   5
   0 -16   3 4708.85 394.990   5
   0 -16   4 4394.56 391.563   5
   0 -16   5 805.418 198.188   5
   0 -16   6 148.496 162.824   5
   0 -16   7 3346.37 352.945   5
   0 -16   8 3204.72 332.529   5
   0 -16   9 824.130 205.911   5
   0 -16  10 109.190 166.213   5
   0 -16  11 922.192 220.027   5
   0 -15   0 1457.11 264.340   5
   0 -15   1 4833.30 406.232   5
   0 -15   2 7912.49 499.645   5
   0 -15   3 236.270 159.573   5
   0 -15   4 1284.31 228.874   5
   0 -15   5 6387.46 436.060   5
   0 -15   6 4528.14 371.022   5
   0 -15   7 849.237 185.313   5
   0 -15   8 824.330 179.026   5
   0 -15   9 3637.77 326.506   5
   0 -15  10 3813.13 347.546   5
   0 -15  11 473.910 160.501   5
   0 -14  -1 5253.89 427.455   5
   0 -14   0 2219.56 271.338   5
   0 -14   1 269.912 124.057   5
   0 -14   2 5210.07 383.391   5
   0 -14   3 8830.90 481.540   5
   0 -14   4 799.546 180.330   5
   0 -14   5 477.054 140.408   5
   0 -14   6 2176.83 259.751   5
   0 -14   7 5862.26 393.062   5
   0 -14   8 5182.03 361.907   5
   0 -14   9 225.372 126.493   5
   0 -14  10 2279.66 261.112   5
   0 -14  11 7539.48 469.867   5
   0 -14  12 6424.04 444.914   5
   0 -13  -1 841.011 181.921   5
   0 -13   0 1895.99 252.093   5
   0 -13   1 2212.39 255.250   5
   0 -13   2 770.706 169.367   5
   0 -13   3 90.2467 109.060   5
   0 -13   4 7200.95 418.169   5
   0 -13   5 16890.8 627.972   5
   0 -13   6 8272.10 428.364   5
   0 -13   7 1666.96 198.468   5
   0 -13   8 3208.92 293.426   5
   0 -13   9 9786.63 509.146   5
   0 -13  10 5627.85 385.687   5
   0 -13  11 621.058 177.872   5
   0 -13  11 208.523 136.624   6
   0 -13  12 1585.96 254.050   6
   0 -13  12 1644.69 239.766   5
   0 -13  13 3792.17 377.153   6
   0 -13  13 3759.12 343.716   5
   0 -12  -2 10261.2 555.757   5
   0 -12  -1 8850.48 485.109   5
   0 -12   0 4221.21 327.631   5
   0 -12   1 1019.27 191.956   5
   0 -12   2 9705.28 463.047   5
   0 -12   3 10797.1 484.533   5
   0 -12   4 1431.16 198.322   5
   0 -12   5 508.707 121.741   5
   0 -12   6 4115.89 297.481   5
   0 -12   7 6727.49 396.149   5
   0 -12   8 9802.27 518.695   6
   0 -12   8 9907.07 473.576   5
   0 -12   9 1675.50 220.242   5
   0 -12   9 1389.61 213.721   6
   0 -12  10 1902.26 261.376   6
   0 -12  10 2124.78 240.943   5
   0 -12  11 11174.3 524.278   5
   0 -12  11 11311.9 597.490   6
   0 -12  12 6991.27 425.881   5
   0 -12  12 7934.44 526.019   6
   0 -12  13 677.086 167.439   5
   0 -12  13 560.793 166.262   6
   0 -12  14-194.198 205.334   6
   0 -11  -2 629.929 166.662   5
   0 -11  -1 10615.9 486.937   5
   0 -11   0 10746.4 474.944   5
   0 -11   1 16242.9 570.931   5
   0 -11   2 5165.98 323.543   5
   0 -11   3 2800.37 238.235   5
   0 -11   4 19217.2 598.385   5
   0 -11   5 26968.9 729.009   5
   0 -11   6 7596.17 419.805   6
   0 -11   6 7900.41 402.283   5
   0 -11   7 32.5904 127.909   6
   0 -11   7 242.948 128.651   5
   0 -11   8 10296.0 459.053   5
   0 -11   8 10556.4 521.578   6
   0 -11   9 21349.0 767.292   6
   0 -11   9 20979.5 665.228   5
   0 -11  10 12103.2 593.554   6
   0 -11  10 11846.4 505.636   5
   0 -11  11 182.291 129.951   6
   0 -11  11 199.816 113.763   5
   0 -11  12 3764.76 362.386   6
   0 -11  12 3438.45 292.772   5
   0 -11  13 7557.32 510.687   6
   0 -11  13 6964.01 422.520   5
   0 -11  14 3458.31 359.973   6
   0 -11  14 2985.41 290.522   5
   0 -11  15 2293.23 302.534   6
   0 -10  -2 21182.5 693.938   5
   0 -10  -1 10771.2 460.069   5
   0 -10   0 1629.20 181.592   5
   0 -10   1 12742.2 476.117   5
   0 -10   2 31639.5 742.834   5
   0 -10   3 21210.9 596.482   5
   0 -10   4 1999.49 201.049   5
   0 -10   5 6381.88 366.514   6
   0 -10   5 6468.88 342.619   5
   0 -10   6 21154.5 605.932   5
   0 -10   6 21121.7 668.480   6
   0 -10   7 9305.97 464.206   6
   0 -10   7 8959.20 407.247   5
   0 -10   8 7597.90 432.044   6
   0 -10   8 7947.88 389.316   5
   0 -10   9 680.443 129.323   5
   0 -10   9 698.109 164.644   6
   0 -10  10 12200.9 576.585   6
   0 -10  10 12388.8 502.516   5
   0 -10  11 16424.0 595.934   5
   0 -10  11 16901.4 695.379   6
   0 -10  12 8583.30 509.630   6
   0 -10  12 8180.50 424.708   5
   0 -10  13 51.1888 108.640   5
   0 -10  13 65.9369 129.662   6
   0 -10  14 1908.00 221.349   5
   0 -10  14 2427.27 307.370   6
   0 -10  15 3459.71 300.893   5
   0 -10  15 4126.78 393.528   6
   0 -10  16 4931.16 442.315   6
   0  -9  -2 5586.89 335.468   5
   0  -9  -1 15169.1 510.421   5
   0  -9   0 24797.2 634.185   5
   0  -9   1 8674.93 370.779   5
   0  -9   2 210.468 83.5550   5
   0  -9   3 14381.7 470.816   5
   0  -9   4 45314.4 845.991   5
   0  -9   4 43913.9 886.418   6
   0  -9   5 23742.5 664.158   6
   0  -9   5 24308.5 610.943   5
   0  -9   6 627.307 144.562   6
   0  -9   6 559.196 116.723   5
   0  -9   7 15205.4 503.619   5
   0  -9   7 14764.3 556.152   6
   0  -9   8 7303.05 352.282   5
   0  -9   8 7866.25 428.388   6
   0  -9   9 21387.0 625.398   5
   0  -9   9 22396.7 734.975   6
   0  -9  10 3626.62 314.727   6
   0  -9  10 3599.74 262.858   5
   0  -9  11 47.1279 116.154   5
   0  -9  11 378.959 149.293   6
   0  -9  12 2718.83 238.825   5
   0  -9  12 3387.25 323.092   6
   0  -9  13 6930.27 474.856   6
   0  -9  13 5930.68 358.868   5
   0  -9  14 2587.84 248.400   5
   0  -9  14 3451.80 358.982   6
   0  -9  15-121.604 145.937   5
   0  -9  15-6.01776 149.419   6
   0  -9  16 1800.15 268.243   6
   0  -9  17 3776.75 396.015   6
   0  -8  -2 29616.3 711.079   5
   0  -8  -1 3799.75 242.771   5
   0  -8   0 7052.46 318.588   5
   0  -8   1 39764.2 745.847   5
   0  -8   2 42779.5 769.409   5
   0  -8   3 18139.7 520.817   6
   0  -8   3 18397.9 498.333   5
   0  -8   4 1427.49 162.330   6
   0  -8   4 1353.24 153.902   5
   0  -8   5 14455.8 493.245   6
   0  -8   5 13909.6 442.170   5
   0  -8   6 35504.1 725.191   5
   0  -8   6 35912.2 811.460   6
   0  -8   7 26018.2 634.842   5
   0  -8   7 26237.6 714.518   6
   0  -8   8 25.2829 93.6704   5
   0  -8   8 121.449 112.916   6
   0  -8   9 2850.94 213.799   5
   0  -8   9 3633.90 298.546   6
   0  -8  10 13695.7 571.689   6
   0  -8  10 13326.4 489.206   5
   0  -8  11 9685.15 500.637   6
   0  -8  11 8895.45 415.287   5
   0  -8  12 774.181 168.457   6
   0  -8  12 471.153 115.956   5
   0  -8  13 720.350 176.993   6
   0  -8  13 378.379 103.553   5
   0  -8  14 3840.42 366.214   6
   0  -8  15 5432.96 438.762   6
   0  -8  16 1194.22 256.404   6
   0  -8  17 435.611 196.653   6
   0  -8  18 967.303 240.215   6
   0  -7  -2 7815.16 343.842   5
   0  -7  -1 34504.3 682.875   5
   0  -7   0 44123.2 752.057   5
   0  -7   1 4652.90 239.061   5
   0  -7   2 408.111 105.414   5
   0  -7   3 30304.3 598.396   5
   0  -7   3 30612.0 647.779   6
   0  -7   4 35976.6 724.030   6
   0  -7   4 35923.0 668.100   5
   0  -7   5 3399.38 240.385   6
   0  -7   5 3087.10 200.839   5
   0  -7   6 1517.90 148.194   5
   0  -7   6 1734.96 182.983   6
   0  -7   7 10268.6 429.727   6
   0  -7   7 10220.3 372.941   5
   0  -7   8 17338.5 581.106   6
   0  -7   8 16913.1 498.661   5
   0  -7   9 1538.19 198.702   6
   0  -7  10 476.631 160.798   6
   0  -7  11 2121.36 241.898   6
   0  -7  12 11308.9 539.555   6
   0  -7  13 3593.33 325.436   6
   0  -7  14 113.520 149.949   6
   0  -7  15 1832.51 261.821   6
   0  -7  16 5603.04 458.486   6
   0  -7  17 6055.06 485.887   6
   0  -7  18 2419.30 327.128   6
   0  -7  19 775.976 241.379   6
   0  -6  -2 23985.0 556.472   5
   0  -6  -1 435.599 85.6511   5
   0  -6   0 9267.38 310.115   5
   0  -6   1 35491.3 608.269   5
   0  -6   2 10790.8 328.805   5
   0  -6   2 10491.9 335.714   6
   0  -6   3 2615.53 173.700   5
   0  -6   3 2395.32 175.575   6
   0  -6   4 211.062 65.5687   5
   0  -6   4 264.371 94.7165   6
   0  -6   5 6423.79 301.590   6
   0  -6   5 6075.46 254.719   5
   0  -6   6 8214.05 311.234   5
   0  -6   6 8300.98 354.930   6
   0  -6   7 5078.38 289.111   6
   0  -6   8 770.673 138.905   6
   0  -6   9 16714.2 554.090   6
   0  -6  10 9054.05 424.071   6
   0  -6  11 1006.22 170.118   6
   0  -6  12 151.183 111.836   6
   0  -6  13 5605.89 381.816   6
   0  -6  14 5603.35 395.861   6
   0  -6  15 2938.98 321.572   6
   0  -6  16 59.7871 154.932   6
   0  -6  17 2006.97 301.055   6
   0  -6  18 6721.30 523.632   6
   0  -6  19 7868.63 569.735   6
   0  -5  -2 9245.00 330.018   5
   0  -5  -1 17828.8 408.902   5
   0  -5   0 7409.67 253.552   5
   0  -5   1 1261.84 117.325   6
   0  -5   1 1430.99 129.516   5
   0  -5   2 9703.93 302.187   6
   0  -5   2 9852.33 289.416   5
   0  -5   3 27221.8 540.653   6
   0  -5   3 27299.7 496.269   5
   0  -5   4 41997.5 708.110   6
   0  -5   4 41985.1 640.007   5
   0  -5   5 5467.12 269.399   6
   0  -5   6 266.069 87.4379   6
   0  -5   7 16649.8 499.736   6
   0  -5   8 10072.0 406.389   6
   0  -5   9 7703.96 370.674   6
   0  -5  10 420.841 127.812   6
   0  -5  11 7019.64 381.966   6
   0  -5  12 14377.8 570.165   6
   0  -5  13 13548.2 572.025   6
   0  -5  14 58.0104 106.184   6
   0  -5  15 4308.87 360.507   6
   0  -5  16 5738.12 427.156   6
   0  -5  17 5745.60 433.303   6
   0  -5  18 2127.36 298.200   6
   0  -5  19 40.6171 154.143   6
   0  -5  20 5022.41 477.411   6
   0  -4  -2 6656.14 265.461   5
   0  -4  -1 6556.52 229.975   5
   0  -4   0 5920.12 202.891   5
   0  -4   1 9365.96 253.977   5
   0  -4   1 9381.77 259.032   6
   0  -4   2 31587.7 477.933   5
   0  -4   2 31395.5 510.973   6
   0  -4   3 4979.01 212.590   6
   0  -4   3 5077.71 193.009   5
   0  -4   4 12423.6 352.374   6
   0  -4   5 30541.4 596.310   6
   0  -4   6 5518.11 276.391   6
   0  -4   7 352.470 108.697   6
   0  -4   8 12933.2 432.958   6
   0  -4   9 19389.2 556.808   6
   0  -4  10 23087.6 635.339   6
   0  -4  11 7329.84 376.693   6
   0  -4  12 490.575 144.804   6
   0  -4  13 12438.3 533.291   6
   0  -4  14 16360.4 633.548   6
   0  -4  15 7656.98 462.400   6
   0  -4  16 232.394 127.296   6
   0  -4  17 3493.80 341.828   6
   0  -4  18 8226.84 522.757   6
   0  -4  19 6030.62 478.181   6
   0  -4  20 2113.00 329.050   6
   0  -3  -1 10781.6 258.173   5
   0  -3   0 3128.91 134.299   5
   0  -3   1 2051.62 113.170   5
   0  -3   1 2230.87 120.621   6
   0  -3   2 49260.0 549.961   5
   0  -3   2 49193.0 593.620   6
   0  -3   3 10480.8 283.524   6
   0  -3   4 27139.7 492.869   6
   0  -3   5 3642.07 193.155   6
   0  -3   6 36369.0 640.332   6
   0  -3   7 21905.3 520.160   6
   0  -3   8 20305.6 522.723   6
   0  -3   9 394.480 108.531   6
   0  -3  10 3095.77 232.882   6
   0  -3  11 20370.7 601.670   6
   0  -3  12 21123.1 645.534   6
   0  -3  13 7286.71 402.752   6
   0  -3  14 452.476 142.996   6
   0  -3  15 6232.42 402.424   6
   0  -3  16 10139.9 532.943   6
   0  -3  17 5247.37 412.423   6
   0  -3  18 91.0332 156.417   6
   0  -3  19 931.720 211.861   6
   0  -3  20 2514.78 328.841   6
   0  -2  -1 49317.4 508.620   5
   0  -2   1 54268.7 518.710   6
   0  -2   1 54186.2 490.824   5
   0  -2   2 952.603 82.4137   6
   0  -2   3 26643.3 412.169   6
   0  -2   4 43810.2 587.328   6
   0  -2   5 84158.4 922.159   6
   0  -2   6 50202.3 727.773   6
   0  -2   7 9025.69 320.918   6
   0  -2   8 20169.0 502.920   6
   0  -2   9 35580.6 711.330   6
   0  -2  10 20487.1 560.739   6
   0  -2  11 4723.03 288.358   6
   0  -2  12 2656.96 237.990   6
   0  -2  13 16442.5 578.301   6
   0  -2  14 21351.2 687.016   6
   0  -2  15 5174.10 363.952   6
   0  -2  16 388.415 161.369   6
   0  -2  17 2286.76 281.600   6
   0  -2  18 3250.45 336.829   6
   0  -2  19 1666.36 273.000   6
   0  -2  20 61.0200 151.597   6
   0  -1   1 3899.17 96.3051   6
   0  -1   2 35859.3 389.288   6
   0  -1   3 55153.3 567.884   6
   0  -1   4 30998.7 459.466   6
   0  -1   5 20829.2 405.054   6
   0  -1   6 71867.5 861.482   6
   0  -1   7 89217.2 1035.61   6
   0  -1   8 15951.8 432.182   6
   0  -1   9 133.681 68.6106   6
   0  -1  10 1157.96 138.338   6
   0  -1  11 8551.70 372.006   6
   0  -1  12 5761.72 321.332   6
   0  -1  13 55.4018 100.046   6
   0  -1  14 1070.96 181.196   6
   0  -1  15 4995.70 350.373   6
   0  -1  16 4970.38 364.070   6
   0  -1  17 3133.80 309.927   6
   0  -1  18 211.490 153.682   6
   0  -1  19 2145.67 294.975   6
   0   0 -11 1437.58 165.048   6
   0   0 -10 15150.3 475.137   6
   0   0  -9 42355.8 762.289   6
   0   0  -8 29611.0 598.720   6
   0   0  -7 380.292 78.6048   6
   0   0  -6 21615.0 436.431   6
   0   0  -5 42989.5 581.437   6
   0   0  -4 60677.8 649.320   6
   0   0  -3 58011.2 567.514   6
   0   0  -2 6076.28 134.893   6
   0   0   2 6383.15 135.140   6
   0   0   3 59439.7 561.028   6
   0   0   4 61549.2 641.305   6
   0   0   5 43766.7 572.473   6
   0   0   6 21148.4 420.168   6
   0   0   7 415.679 84.6204   6
   0   0   8 29740.8 576.335   6
   0   0   9 43721.5 750.595   6
   0   0  10 15135.0 456.211   6
   0   0  11 1741.97 170.991   6
   0   0  12 5751.24 309.284   6
   0   0  13 16824.8 552.869   6
   0   0  14 8968.88 427.120   6
   0   0  15 141.571 100.729   6
   0   0  16 2400.07 255.424   6
   0   0  17 3004.52 296.555   6
   0   0  18 3438.92 320.533   6
   0   0  19 458.977 178.174   6
   0   1 -10 1004.25 130.382   6
   0   1  -9 150.671 63.9840   6
   0   1  -8 16325.5 448.679   6
   0   1  -7 89611.4 1051.17   6
   0   1  -6 74851.1 905.412   6
   0   1  -5 21475.0 418.922   6
   0   1  -4 31152.2 465.401   6
   0   1  -3 54697.6 575.894   6
   0   1  -2 35214.4 393.642   6
   0   1  -1 3773.51 96.2107   6
   0   1   3 15230.3 245.872   6
   0   1   4 16919.7 299.059   6
   0   1   5 19563.9 361.868   6
   0   1   6 60839.3 739.740   6
   0   1   7 25399.2 486.106   6
   0   1   8 243.525 72.1518   6
   0   1   9 2747.44 185.633   6
   0   1  10 11008.1 380.234   6
   0   1  11 9279.94 369.883   6
   0   1  12 2184.49 195.749   6
   0   1  13 448.363 110.668   6
   0   1  14 5025.02 314.888   6
   0   1  15 5203.89 339.975   6
   0   1  16 1458.82 200.730   6
   0   1  17 24.6349 111.197   6
   0   1  18 606.773 180.644   6
   0   1  19 7423.06 473.486   6
   0   2 -10 19475.5 562.472   6
   0   2  -9 35618.3 735.229   6
   0   2  -8 21098.8 536.748   6
   0   2  -7 9339.64 333.028   6
   0   2  -6 51319.7 746.837   6
   0   2  -5 84976.1 937.486   6
   0   2  -4 42435.8 588.095   6
   0   2  -3 25815.6 410.609   6
   0   2  -2 983.777 82.3867   6
   0   2  -1 54285.3 511.055   6
   0   2  -1 53905.3 491.505   5
   0   2   0 69106.9 556.348   6
   0   2   0 68623.0 571.659   5
   0   2   1 49894.5 495.085   5
   0   2   5 2554.49 130.053   6
   0   2   6 2499.45 138.589   6
   0   2   7 4896.47 209.310   6
   0   2   8 14562.8 388.685   6
   0   2   9 6522.28 275.382   6
   0   2  10 810.620 112.454   6
   0   2  11 499.857 107.831   6
   0   2  12 14586.0 479.465   6
   0   2  13 12615.0 467.096   6
   0   2  14 5370.99 319.349   6
   0   2  15-38.7811 104.756   6
   0   2  16 4191.05 311.008   6
   0   2  17 4357.50 336.900   6
   0   2  18 967.232 196.350   6
   0   3  -9 269.438 91.1303   6
   0   3  -8 20060.9 533.096   6
   0   3  -7 22164.8 529.524   6
   0   3  -6 36667.3 650.396   6
   0   3  -5 3550.06 189.613   6
   0   3  -4 27593.7 498.579   6
   0   3  -3 10813.5 287.091   6
   0   3  -2 48809.0 585.836   6
   0   3  -1 2035.26 105.532   5
   0   3  -1 2131.75 114.540   6
   0   3   0 2953.19 129.131   5
   0   3   0 3087.08 122.579   6
   0   3   1 10440.0 244.807   5
   0   3   2 30216.1 460.826   5
   0   3   3 3576.36 190.058   5
   0   3   7 9350.83 287.028   6
   0   3   8 60.6557 64.3216   6
   0   3   9 7782.57 297.642   6
   0   3  10 14015.2 422.649   6
   0   3  11 3498.41 224.481   6
   0   3  12 8640.39 363.284   6
   0   3  13 3271.11 242.406   6
   0   3  14 10100.8 431.095   6
   0   3  15 7116.33 381.485   6
   0   3  16 847.195 147.400   6
   0   3  17 465.782 131.745   6
   0   3  18 4088.28 327.716   6
   0   4  -8 12982.3 442.579   6
   0   4  -7 321.313 86.0089   6
   0   4  -6 4959.92 248.872   6
   0   4  -5 31837.7 599.313   6
   0   4  -4 13143.6 361.890   6
   0   4  -3 5036.11 214.775   6
   0   4  -2 31460.1 501.893   6
   0   4  -1 9610.56 252.927   5
   0   4  -1 9799.69 260.274   6
   0   4   0 5599.91 197.769   5
   0   4   0 5978.67 193.283   6
   0   4   1 6844.73 221.793   5
   0   4   2 6632.65 230.381   5
   0   4   3 2275.64 150.297   5
   0   4   4 5022.28 254.397   5
   0   4   8 14372.3 382.397   6
   0   4   9 5339.77 241.984   6
   0   4  10 630.100 106.440   6
   0   4  11 9967.73 379.082   6
   0   4  12 2890.73 215.609   6
   0   4  13 7886.45 361.975   6
   0   4  14-79.5521 91.7119   6
   0   4  15 1969.53 211.165   6
   0   4  16 4878.03 329.933   6
   0   4  17 3636.89 294.407   6
   0   5  -7 16624.0 504.566   6
   0   5  -6 292.391 74.8356   6
   0   5  -5 5727.46 274.180   6
   0   5  -4 42765.7 715.886   6
   0   5  -3 27235.7 532.636   6
   0   5  -2 9958.71 301.781   6
   0   5  -2 10075.0 286.382   5
   0   5  -1 1351.54 118.471   6
   0   5  -1 1361.64 114.494   5
   0   5   0 7472.40 237.793   6
   0   5   0 7577.98 252.231   5
   0   5   1 18057.1 402.492   5
   0   5   2 8859.02 288.754   5
   0   5   3 257.910 76.8652   5
   0   5   4 12405.8 379.999   5
   0   5   5 13886.3 411.709   5
   0   5   6 17828.5 548.554   5
   0   5   9 13135.0 387.156   6
   0   5  10 13817.8 411.902   6
   0   5  11 4314.31 244.276   6
   0   5  12 743.721 120.081   6
   0   5  13 858.040 133.692   6
   0   5  14 9987.64 424.993   6
   0   5  15 4640.35 303.164   6
   0   5  16 39.3164 96.0961   6
   0   6  -6 8438.44 362.406   6
   0   6  -5 6317.59 298.053   6
   0   6  -4 263.267 87.5888   6
   0   6  -3 2509.60 183.626   6
   0   6  -2 11038.2 339.656   6
   0   6  -2 11031.4 326.622   5
   0   6  -1 35561.8 600.096   6
   0   6  -1 36436.9 611.021   5
   0   6   0 9417.29 308.109   5
   0   6   0 9136.31 291.069   6
   0   6   1 508.264 89.6161   5
   0   6   1 564.924 79.5748   6
   0   6   2 24110.4 514.477   5
   0   6   3 25285.3 550.377   5
   0   6   4 19025.4 490.967   5
   0   6   5 18.3907 76.5868   5
   0   6   6 1799.27 182.385   5
   0   6  10 1822.98 158.118   6
   0   6  11 8403.27 341.406   6
   0   6  12 13969.2 460.217   6
   0   6  13 2704.86 215.561   6
   0   6  14-19.9102 110.129   6
   0   6  15 1315.70 171.827   6
   0   6  16 5704.16 346.497   6
   0   7  -4 35652.4 717.650   6
   0   7  -3 29923.0 629.008   6
   0   7  -2 332.966 90.5179   6
   0   7  -2 247.898 59.9336   5
   0   7  -1 4719.69 234.890   6
   0   7  -1 4892.72 239.328   5
   0   7   0 44556.4 707.019   6
   0   7   0 43994.3 745.717   5
   0   7   1 35464.2 659.671   5
   0   7   1 34073.8 598.281   6
   0   7   2 7956.80 278.615   6
   0   7   2 8734.86 336.951   5
   0   7   3 10088.1 360.459   5
   0   7   4 31189.4 663.461   5
   0   7   5 41010.4 807.936   5
   0   7  10 18270.2 485.852   6
   0   7  11 3607.24 225.204   6
   0   7  12 1193.28 134.576   6
   0   7  13 5810.49 313.048   6
   0   7  14 4398.91 290.060   6
   0   7  15 679.223 124.580   6
   0   8  -3 17590.0 505.842   6
   0   8  -2 41506.5 769.537   6
   0   8  -2 42642.6 763.341   5
   0   8  -1 39223.7 714.668   6
   0   8  -1 40896.6 750.621   5
   0   8   0 6792.53 291.139   6
   0   8   0 7503.79 321.934   5
   0   8   1 3736.12 209.043   6
   0   8   1 3987.12 235.608   5
   0   8   2 29532.3 584.397   6
   0   8   2 29320.5 656.967   5
   0   8  11 8300.97 343.906   6
   0   8  12 6511.01 314.484   6
   0   8  13 1742.34 172.483   6
   0   8  14-20.4009 98.0706   6
   0   9  -1 7629.66 325.816   6
   0   9   0 24761.8 588.038   6
   0   9   1 14844.4 444.297   6
   0   9   2 5214.79 259.394   6
   0   9   3 1721.92 151.868   6
   0   9  12 1414.06 150.127   6
   0   9  13 3189.15 233.968   6
   0   9  14 2830.95 228.146   6
   0  10   3 9401.47 367.938   6
   0  10   4 1851.66 161.346   6
   0  10  12 1917.13 174.218   6
   0  10  13-69.7058 107.288   6
   1 -18   1 383.788 201.046   5
   1 -18   2 1925.74 316.092   5
   1 -18   3 3963.33 434.275   5
   1 -18   4 3524.08 399.209   5
   1 -18   5 786.047 263.422   5
   1 -18   6 311.145 222.536   5
   1 -18   7 3322.91 396.551   5
   1 -17   0 3402.37 427.812   5
   1 -17   1 7131.68 551.661   5
   1 -17   2 4505.35 430.499   5
   1 -17   3 125.793 156.938   5
   1 -17   4 1283.23 263.199   5
   1 -17   5 3896.73 396.519   5
   1 -17   6 3340.64 362.560   5
   1 -17   7 1330.12 267.368   5
   1 -17   8 670.497 227.290   5
   1 -17   9 3034.58 354.884   5
   1 -17  10 5079.08 449.418   5
   1 -16  -1 5643.06 508.815   5
   1 -16   0 2617.05 339.914   5
   1 -16   1 154.876 159.977   5
   1 -16   2 3372.03 362.321   5
   1 -16   3 9720.53 581.563   5
   1 -16   4 6366.51 471.967   5
   1 -16   5 340.066 156.171   5
   1 -16   6 1679.39 276.033   5
   1 -16   7 6489.67 476.102   5
   1 -16   8 4097.55 376.133   5
   1 -16   9 346.247 154.461   5
   1 -16  10 6.84068 173.510   5
   1 -16  11 2753.33 335.110   5
   1 -16  12 2958.23 340.823   5
   1 -15  -1 746.606 221.549   5
   1 -15   0 6222.04 477.865   5
   1 -15   1 7631.41 505.371   5
   1 -15   2 2438.89 304.152   5
   1 -15   3 2640.74 307.982   5
   1 -15   4 8871.82 532.859   5
   1 -15   5 10870.8 577.267   5
   1 -15   6 5522.99 412.711   5
   1 -15   7 764.829 173.124   5
   1 -15   8 786.745 177.581   5
   1 -15   9 6258.93 447.803   5
   1 -15  10 4179.40 392.357   5
   1 -15  11 1135.18 246.432   5
   1 -15  12 572.875 207.016   5
   1 -15  13 2127.14 316.867   5
   1 -14  -2 8863.52 587.764   5
   1 -14  -1 6036.49 436.305   5
   1 -14   0 654.592 160.390   5
   1 -14   1 492.598 166.834   5
   1 -14   2 1817.13 247.428   5
   1 -14   3 3616.27 328.118   5
   1 -14   4 875.769 170.726   5
   1 -14   5 43.3894 125.499   5
   1 -14   6 1234.53 196.512   5
   1 -14   7 4772.39 369.306   5
   1 -14   8 2781.40 311.576   5
   1 -14   9 269.551 151.127   5
   1 -14  10 1843.44 264.395   6
   1 -14  10 2497.39 301.495   5
   1 -14  11 3776.53 383.032   6
   1 -14  11 3764.63 360.735   5
   1 -14  12 2598.65 322.852   5
   1 -14  12 2520.98 310.645   6
   1 -14  13 276.300 176.657   5
   1 -14  14 435.143 194.532   5
   1 -13  -2 314.947 137.254   5
   1 -13  -1 2426.44 271.159   5
   1 -13   0 7117.09 442.282   5
   1 -13   1 8473.44 466.749   5
   1 -13   2 3826.13 325.313   5
   1 -13   3-42.0497 126.215   5
   1 -13   4 6943.40 414.524   5
   1 -13   5 11555.6 539.492   5
   1 -13   6 2991.08 294.627   5
   1 -13   7 3049.57 300.427   5
   1 -13   7 2484.23 266.553   6
   1 -13   8 959.041 191.534   6
   1 -13   8 1210.03 222.793   5
   1 -13   9 4699.45 367.830   5
   1 -13   9 4400.09 368.725   6
   1 -13  10 2585.07 291.884   5
   1 -13  10 2392.68 294.874   6
   1 -13  11 275.714 155.999   5
   1 -13  11 29.5467 137.142   6
   1 -13  12 1682.72 265.906   6
   1 -13  12 2018.01 275.147   5
   1 -13  13 2698.58 316.733   5
   1 -13  13 3279.15 375.363   6
   1 -13  14 2511.11 308.659   5
   1 -12  -3 3657.42 354.709   5
   1 -12  -2 7608.60 453.161   5
   1 -12  -1 5558.32 386.863   5
   1 -12   0 658.007 151.877   5
   1 -12   1 1711.32 212.704   5
   1 -12   2 5718.63 369.766   5
   1 -12   3 4572.43 321.780   5
   1 -12   4 47.5166 121.260   5
   1 -12   5 2553.58 271.651   5
   1 -12   6 6351.44 400.311   5
   1 -12   6 6570.35 406.014   6
   1 -12   7 522.851 136.305   6
   1 -12   7 581.302 149.304   5
   1 -12   8 2528.24 278.010   6
   1 -12   8 2387.22 255.529   5
   1 -12   9 531.924 155.988   5
   1 -12   9 512.769 143.517   6
   1 -12  10 3784.23 359.237   6
   1 -12  10 3724.34 326.648   5
   1 -12  11 8397.63 538.048   6
   1 -12  11 8434.68 486.574   5
   1 -12  12 2683.74 294.434   5
   1 -12  12 3252.69 354.324   6
   1 -12  13 88.1662 114.905   5
   1 -12  13 349.469 168.062   6
   1 -12  14 3391.88 334.481   5
   1 -12  14 3804.94 398.550   6
   1 -12  15 5577.22 441.595   5
   1 -11  -3 4767.47 376.313   5
   1 -11  -2 127.941 117.124   5
   1 -11  -1 5022.46 346.059   5
   1 -11   0 6809.79 387.398   5
   1 -11   1 3137.57 264.135   5
   1 -11   2 197.128 93.1098   5
   1 -11   3 3930.37 288.553   5
   1 -11   4 8798.02 445.534   5
   1 -11   4 7540.62 398.543   6
   1 -11   5 5014.46 329.534   5
   1 -11   5 4752.96 318.121   6
   1 -11   6 370.353 126.893   5
   1 -11   6 426.699 139.222   6
   1 -11   7 9067.73 478.256   6
   1 -11   7 9108.69 454.582   5
   1 -11   8 5139.65 378.075   6
   1 -11   8 5294.65 354.369   5
   1 -11   9 13427.4 571.745   5
   1 -11   9 13261.6 609.378   6
   1 -11  10 3130.87 323.187   6
   1 -11  10 2962.76 288.213   5
   1 -11  11 439.512 191.266   6
   1 -11  11 423.416 127.434   5
   1 -11  12 5993.57 409.617   5
   1 -11  12 7375.59 497.835   6
   1 -11  13 7234.69 519.523   6
   1 -11  13 6576.49 433.874   5
   1 -11  14 1474.37 217.789   5
   1 -11  14 1850.13 284.848   6
   1 -11  15-122.917 178.381   5
   1 -11  15 155.101 162.684   6
   1 -10  -3 7601.02 429.117   5
   1 -10  -2 10207.0 462.405   5
   1 -10  -1 118.047 89.5922   5
   1 -10   0 11277.8 469.908   5
   1 -10   1 9944.81 430.180   5
   1 -10   2 22047.0 640.701   5
   1 -10   3 9458.29 431.800   5
   1 -10   3 9301.31 413.116   6
   1 -10   4 280.972 126.884   5
   1 -10   4 255.806 108.930   6
   1 -10   5 12831.9 515.588   6
   1 -10   5 13099.4 503.969   5
   1 -10   6 18474.7 629.843   6
   1 -10   6 18149.5 600.082   5
   1 -10   7 11111.0 507.372   6
   1 -10   7 10647.9 471.873   5
   1 -10   8 890.779 149.139   5
   1 -10   8 1032.66 177.144   6
   1 -10   9 3467.73 317.549   6
   1 -10   9 3270.99 270.936   5
   1 -10  10 14135.8 635.100   6
   1 -10  10 13931.7 569.136   5
   1 -10  11 15988.2 696.155   6
   1 -10  11 15117.4 609.587   5
   1 -10  12 4125.25 378.352   6
   1 -10  12 3474.62 294.954   5
   1 -10  13 216.521 136.003   5
   1 -10  13 545.196 169.516   6
   1 -10  14 6738.18 501.862   6
   1 -10  14 5046.71 378.390   5
   1 -10  15 7287.54 544.600   6
   1 -10  15 5520.09 406.216   5
   1 -10  16 6122.32 508.843   6
   1 -10  16 3784.07 336.245   5
   1  -9  -3 614.211 138.252   5
   1  -9  -2 2213.66 213.946   5
   1  -9  -1 8804.98 398.750   5
   1  -9   0 13969.9 487.435   5
   1  -9   1 49.5670 91.2609   5
   1  -9   2 3552.63 260.463   5
   1  -9   3 22711.5 615.254   5
   1  -9   3 22410.4 605.150   6
   1  -9   4 30418.8 735.018   6
   1  -9   4 31203.1 730.895   5
   1  -9   5 8685.81 402.830   6
   1  -9   5 9003.87 400.973   5
   1  -9   6 784.203 155.002   6
   1  -9   6 701.002 136.477   5
   1  -9   7 17601.9 576.854   5
   1  -9   7 16797.3 607.737   6
   1  -9   8 22539.3 726.387   6
   1  -9   8 22286.6 662.844   5
   1  -9   9 9577.04 491.358   6
   1  -9   9 9074.29 432.973   5
   1  -9  10 706.792 178.888   6
   1  -9  10 390.160 105.019   5
   1  -9  11 1054.79 154.814   5
   1  -9  11 1286.05 219.698   6
   1  -9  12 9358.86 534.755   6
   1  -9  12 8829.61 463.326   5
   1  -9  13 9992.95 579.396   6
   1  -9  13 8700.39 479.675   5
   1  -9  14 1585.80 215.143   5
   1  -9  14 2477.57 304.427   6
   1  -9  15 175.224 170.233   6
   1  -9  15-69.2934 143.289   5
   1  -9  16 3067.21 362.625   6
   1  -9  16 2343.40 280.251   5
   1  -9  17 5889.80 501.398   6
   1  -8  -3 47279.2 927.734   5
   1  -8  -2 36035.4 776.477   5
   1  -8  -1 214.902 98.0308   5
   1  -8   0 20470.2 556.770   5
   1  -8   1 68534.0 1056.61   5
   1  -8   2 20213.5 528.066   6
   1  -8   2 20207.2 548.402   5
   1  -8   3 2550.93 200.189   6
   1  -8   3 2627.41 205.977   5
   1  -8   4 4414.03 269.539   6
   1  -8   4 4522.02 270.257   5
   1  -8   5 37228.9 811.106   6
   1  -8   5 36551.4 771.593   5
   1  -8   6 32705.1 780.732   6
   1  -8   6 31771.9 731.398   5
   1  -8   7 6520.09 364.320   6
   1  -8   7 6185.25 321.599   5
   1  -8   8 369.352 100.635   5
   1  -8   8 466.238 136.865   6
   1  -8   9 7938.41 431.793   6
   1  -8   9 7890.24 391.850   5
   1  -8  10 22944.4 741.128   6
   1  -8  10 23154.4 697.202   5
   1  -8  11 16202.8 642.368   6
   1  -8  12 2036.37 257.088   6
   1  -8  13 3753.03 335.968   6
   1  -8  14 12271.3 624.899   6
   1  -8  15 7742.84 520.178   6
   1  -8  16 1740.91 288.829   6
   1  -8  17 76.7448 166.870   6
   1  -8  18 1597.32 283.734   6
   1  -7  -3 5305.39 293.624   5
   1  -7  -2 30405.4 662.110   5
   1  -7  -1 42067.9 773.025   5
   1  -7   0 14477.2 431.021   5
   1  -7   1 143.730 69.3921   6
   1  -7   1 169.637 91.6633   5
   1  -7   2 23451.5 534.810   6
   1  -7   2 23637.6 557.942   5
   1  -7   3 24295.2 574.186   6
   1  -7   3 24243.7 578.045   5
   1  -7   4 25315.6 612.192   6
   1  -7   4 25946.1 602.251   5
   1  -7   5 9353.93 380.104   6
   1  -7   5 9169.43 362.744   5
   1  -7   6-15.9449 77.6301   6
   1  -7   6-48.7083 108.008   5
   1  -7   7 12425.7 473.466   6
   1  -7   7 12379.7 447.124   5
   1  -7   8 28101.4 746.926   6
   1  -7   9 11858.3 503.140   6
   1  -7  10 179.389 125.480   6
   1  -7  11 7845.96 438.176   6
   1  -7  12 11519.9 554.502   6
   1  -7  13 2756.56 296.672   6
   1  -7  14 234.809 134.864   6
   1  -7  15 845.096 206.560   6
   1  -7  16 5599.77 454.447   6
   1  -7  17 6555.10 489.640   6
   1  -7  18 1126.77 244.748   6
   1  -6  -3 28764.3 630.685   5
   1  -6  -2 9768.86 357.064   5
   1  -6  -1 3076.59 195.967   5
   1  -6   0 38353.1 682.493   5
   1  -6   1 46080.6 733.502   5
   1  -6   1 46160.4 691.893   6
   1  -6   2 25453.4 533.103   6
   1  -6   2 25773.0 551.256   5
   1  -6   3 4074.97 235.846   6
   1  -6   3 3598.43 203.426   5
   1  -6   4 8642.38 329.522   6
   1  -6   4 9196.24 332.699   5
   1  -6   5 36555.6 736.434   6
   1  -6   5 38706.6 721.528   5
   1  -6   6 18315.0 536.216   6
   1  -6   7 3549.18 255.166   6
   1  -6   8 1251.35 175.133   6
   1  -6   9 6435.10 359.321   6
   1  -6  10 14933.2 567.111   6
   1  -6  11 14904.2 584.543   6
   1  -6  12 3778.13 314.745   6
   1  -6  13 4794.17 368.420   6
   1  -6  14 7413.07 460.786   6
   1  -6  15 3972.23 372.350   6
   1  -6  16 71.6120 127.913   6
   1  -6  17 3996.21 392.195   6
   1  -6  18 5145.45 455.907   6
   1  -6  19 2638.32 345.167   6
   1  -5  -3 8355.10 319.046   5
   1  -5  -2 37624.0 643.055   5
   1  -5  -1 28794.7 537.020   5
   1  -5   0 6758.60 258.771   5
   1  -5   0 6812.03 223.713   6
   1  -5   1 2271.06 144.743   6
   1  -5   1 2534.82 165.963   5
   1  -5   2 14813.2 368.114   6
   1  -5   2 15415.5 390.178   5
   1  -5   3 31256.4 580.264   6
   1  -5   3 32727.1 588.630   5
   1  -5   4 30939.3 609.767   6
   1  -5   5 4678.88 261.763   6
   1  -5   6 1598.73 167.103   6
   1  -5   7 6158.60 314.216   6
   1  -5   8 19531.7 573.605   6
   1  -5   9 5228.31 315.896   6
   1  -5  10 928.724 149.521   6
   1  -5  11 22653.4 695.272   6
   1  -5  12 17955.3 639.817   6
   1  -5  13 5486.09 380.165   6
   1  -5  14 1212.67 208.109   6
   1  -5  15 4951.52 391.608   6
   1  -5  16 5791.75 437.471   6
   1  -5  17 4022.13 382.369   6
   1  -5  18 133.250 157.910   6
   1  -5  19 1638.16 290.598   6
   1  -5  20 4068.92 421.386   6
   1  -4  -3 23469.7 503.326   5
   1  -4  -2 10071.9 299.609   5
   1  -4  -1 10333.7 288.951   5
   1  -4   0 9078.31 268.095   5
   1  -4   0 9120.71 232.180   6
   1  -4   1 1244.06 103.220   6
   1  -4   1 1286.08 115.142   5
   1  -4   2 4338.00 197.693   5
   1  -4   2 4641.93 197.032   6
   1  -4   3 772.329 104.983   6
   1  -4   4 9981.08 325.109   6
   1  -4   5 19756.4 487.047   6
   1  -4   6 9616.79 358.918   6
   1  -4   7 1552.25 165.722   6
   1  -4   8 9554.75 387.406   6
   1  -4   9 12053.7 454.926   6
   1  -4  10 7577.94 379.955   6
   1  -4  11 301.853 125.002   6
   1  -4  12 6478.29 381.992   6
   1  -4  13 10490.9 499.487   6
   1  -4  14 13985.5 601.419   6
   1  -4  15 921.336 189.305   6
   1  -4  16 1545.74 246.558   6
   1  -4  17 6528.00 466.863   6
   1  -4  18 5854.11 464.519   6
   1  -4  19 1499.24 283.471   6
   1  -4  20 327.475 183.590   6
   1  -3  -3 529.422 103.216   5
   1  -3  -2 1856.57 123.806   5
   1  -3  -1 55456.6 647.411   5
   1  -3   0 44047.3 477.307   6
   1  -3   0 44043.2 562.321   5
   1  -3   1 1367.26 99.9016   5
   1  -3   1 1675.91 112.161   6
   1  -3   2 4373.53 178.830   6
   1  -3   3 860.259 98.0835   6
   1  -3   4 3030.61 176.801   6
   1  -3   5 2167.83 162.074   6
   1  -3   6 46121.1 749.965   6
   1  -3   7 26417.0 592.403   6
   1  -3   8 12047.9 416.298   6
   1  -3   9 1492.90 169.491   6
   1  -3  10 9518.90 410.475   6
   1  -3  11 8591.81 405.984   6
   1  -3  12 3794.20 286.180   6
   1  -3  13 311.721 117.880   6
   1  -3  14 3603.05 310.054   6
   1  -3  15 10223.4 522.866   6
   1  -3  16 5530.79 408.090   6
   1  -3  17 1346.63 243.723   6
   1  -3  18 1216.57 245.795   6
   1  -3  19 4606.98 423.196   6
   1  -3  20 4193.39 419.264   6
   1  -2  -2 3358.40 141.276   5
   1  -2  -1 25911.9 373.910   5
   1  -2  -1 26092.8 248.213   6
   1  -2   0 82077.6 734.779   5
   1  -2   0 82662.5 624.898   6
   1  -2   1 27052.8 353.830   6
   1  -2   2 11627.8 261.575   6
   1  -2   3 163.607 58.1340   6
   1  -2   4 17834.4 393.706   6
   1  -2   5 20181.8 447.882   6
   1  -2   6 6869.37 275.075   6
   1  -2   7 15480.5 435.601   6
   1  -2   8 15933.9 467.982   6
   1  -2   9 26279.6 636.917   6
   1  -2  10 10538.1 418.266   6
   1  -2  11 391.960 104.468   6
   1  -2  12 10914.9 461.472   6
   1  -2  13 22487.9 692.215   6
   1  -2  14 9970.79 479.168   6
   1  -2  15 16.0418 110.992   6
   1  -2  16 1792.37 238.279   6
   1  -2  17 5284.06 405.941   6
   1  -2  18 4983.02 404.146   6
   1  -2  19 761.464 219.201   6
   1  -2  20 615.872 221.583   6
   1  -2  21 2574.17 358.908   6
   1  -1  -8 2359.66 152.913   6
   1  -1  -7 54256.8 693.690   6
   1  -1  -6 26917.3 430.553   6
   1  -1  -5 49.6636 43.0219   6
   1  -1  -4 1397.05 75.0387   6
   1  -1  -3 13436.2 180.956   6
   1  -1  -2 46392.9 463.564   5
   1  -1  -1 18848.2 252.054   5
   1  -1   0 556.938 52.0444   5
   1  -1   0 626.427 41.0837   6
   1  -1   1 57257.8 514.639   6
   1  -1   2 86047.4 762.242   6
   1  -1   3 16347.1 321.911   6
   1  -1   4 1242.88 110.371   6
   1  -1   5 5949.46 233.787   6
   1  -1   6 35113.8 607.958   6
   1  -1   7 65032.5 904.506   6
   1  -1   8 5764.88 274.479   6
   1  -1   9 4431.24 259.617   6
   1  -1  10 16565.6 511.974   6
   1  -1  11 14547.0 501.553   6
   1  -1  12 363.351 107.403   6
   1  -1  13 3228.92 262.911   6
   1  -1  14 8504.40 435.312   6
   1  -1  15 11084.9 517.697   6
   1  -1  16 6885.31 427.661   6
   1  -1  17 600.911 165.869   6
   1  -1  18 350.619 158.100   6
   1  -1  19 6573.60 478.751   6
   1  -1  20 3650.41 384.451   6
   1  -1  21 1342.22 270.220   6
   1   0 -12 6363.40 329.431   6
   1   0 -11 334.519 88.2260   6
   1   0 -10 12577.8 409.888   6
   1   0  -9 23227.5 526.088   6
   1   0  -8 7654.57 278.635   6
   1   0  -7 3961.06 189.440   6
   1   0  -6 19553.9 384.368   6
   1   0  -5 27862.0 418.261   6
   1   0  -4 11839.2 234.507   6
   1   0  -3 6494.61 149.103   6
   1   0  -2 51927.6 404.190   6
   1   0   2 65.4810 50.8836   6
   1   0   3 19590.9 349.596   6
   1   0   4 83564.6 862.441   6
   1   0   5 12682.0 331.977   6
   1   0   6 61.8500 64.5153   6
   1   0   7 25749.9 538.390   6
   1   0   8 82582.0 1064.90   6
   1   0   9 30100.2 645.497   6
   1   0  10 3117.60 224.145   6
   1   0  11-142.720 98.1078   6
   1   0  12 27076.0 700.551   6
   1   0  13 25202.0 707.189   6
   1   0  14 8892.35 438.341   6
   1   0  15-270.366 140.434   6
   1   0  16 2660.25 273.313   6
   1   0  17 6279.27 416.885   6
   1   0  18 5087.64 397.774   6
   1   0  19 1278.93 239.105   6
   1   0  20 392.947 193.781   6
   1   1 -11 3927.85 255.445   6
   1   1 -10 833.440 117.093   6
   1   1  -9 244.751 84.4096   6
   1   1  -8 26416.3 558.696   6
   1   1  -7 34181.5 586.814   6
   1   1  -6 35894.0 557.929   6
   1   1  -5 176.947 54.2924   6
   1   1  -4 27757.5 411.164   6
   1   1  -3 39970.9 460.716   6
   1   1  -2 319.154 51.8178   6
   1   1   4 11765.4 290.559   6
   1   1   5 40070.8 595.042   6
   1   1   6 45622.2 675.746   6
   1   1   7 21014.4 476.246   6
   1   1   8 2777.93 187.369   6
   1   1   9 13018.3 419.184   6
   1   1  10 36889.7 746.557   6
   1   1  11 13039.3 458.711   6
   1   1  12 19114.1 579.229   6
   1   1  13 223.396 96.5248   6
   1   1  14 6266.09 364.533   6
   1   1  15 14708.8 578.957   6
   1   1  16 6117.96 395.557   6
   1   1  17 43.5481 116.882   6
   1   1  18 1511.97 230.584   6
   1   1  19 3765.07 356.830   6
   1   1  20 1979.47 293.591   6
   1   2 -10 15576.6 493.925   6
   1   2  -9 12724.6 417.245   6
   1   2  -8 3026.21 196.142   6
   1   2  -7 6101.02 254.525   6
   1   2  -6 16575.4 397.125   6
   1   2  -5 60570.7 750.842   6
   1   2  -4 9593.62 262.326   6
   1   2  -3 14122.1 291.972   6
   1   2  -2 43336.3 507.529   6
   1   2  -1 43752.8 364.598   5
   1   2   6 3426.50 191.363   6
   1   2   7 15405.2 408.691   6
   1   2   8 34816.3 646.596   6
   1   2   9 20392.8 516.634   6
   1   2  10 2999.30 215.133   6
   1   2  11 8021.72 359.884   6
   1   2  12 10544.9 426.741   6
   1   2  13 20162.0 616.171   6
   1   2  14 3207.34 263.398   6
   1   2  15 745.912 152.086   6
   1   2  16 4935.70 353.138   6
   1   2  17 2438.03 257.804   6
   1   2  18 589.832 165.124   6
   1   2  19 135.209 158.331   6
   1   3  -9 19066.0 531.530   6
   1   3  -8 54732.4 874.739   6
   1   3  -7 17702.9 465.126   6
   1   3  -6 632.913 98.2441   6
   1   3  -5 32013.8 568.427   6
   1   3  -4 87523.2 940.750   6
   1   3  -3 81707.1 855.293   6
   1   3  -2 22577.9 394.740   6
   1   3  -2 22319.2 298.228   5
   1   3  -1 980.685 72.5264   5
   1   3  -1 944.602 88.6523   6
   1   3   0 20625.8 322.447   5
   1   3   7 29732.0 579.456   6
   1   3   8 261.541 78.9385   6
   1   3   9 12760.9 406.480   6
   1   3  10 19180.8 522.951   6
   1   3  11 6939.93 334.544   6
   1   3  12 12.9473 98.8539   6
   1   3  13 366.853 111.443   6
   1   3  14 4666.99 314.686   6
   1   3  15 5758.80 363.176   6
   1   3  16 702.981 162.327   6
   1   3  17 2282.14 251.746   6
   1   3  18 4777.07 364.240   6
   1   3  19 2467.96 281.989   6
   1   4  -8 2500.56 195.686   6
   1   4  -7 11495.1 395.976   6
   1   4  -6 19874.1 495.117   6
   1   4  -5 40484.2 683.675   6
   1   4  -4 7237.00 267.770   6
   1   4  -3 5278.46 214.737   6
   1   4  -2 54089.2 697.997   6
   1   4  -2 53106.9 572.554   5
   1   4  -1 67082.9 666.288   5
   1   4  -1 68115.9 764.521   6
   1   4   0 21271.2 366.803   5
   1   4   1 9387.76 266.063   5
   1   4   9 4116.12 233.317   6
   1   4  10 1328.80 140.342   6
   1   4  11 10207.6 400.795   6
   1   4  12 5209.99 302.303   6
   1   4  13 2830.75 239.169   6
   1   4  14-121.864 108.274   6
   1   4  15 2708.10 250.086   6
   1   4  16 5577.03 364.159   6
   1   4  17 2048.82 246.621   6
   1   4  18-133.867 144.793   6
   1   5  -7 23596.2 595.016   6
   1   5  -6 914.344 127.058   6
   1   5  -5 26884.5 583.442   6
   1   5  -4 25609.9 542.953   6
   1   5  -3 18236.8 432.153   6
   1   5  -2 4189.61 204.711   6
   1   5  -2 4077.37 169.470   5
   1   5  -1 2121.22 147.511   6
   1   5  -1 2210.95 131.143   5
   1   5   0 21067.3 408.059   5
   1   5   1 33954.3 554.109   5
   1   5   2 16804.2 409.994   5
   1   5   3 262.434 87.7190   5
   1   5  10 10632.6 392.779   6
   1   5  11 15.1665 83.0877   6
   1   5  12 5775.13 313.789   6
   1   5  13 3223.44 247.388   6
   1   5  14 5460.29 337.374   6
   1   5  15 190.327 91.8533   6
   1   5  16 681.253 145.621   6
   1   5  17 2375.92 248.931   6
   1   5  18 3208.48 294.585   6
   1   6  -6 20794.4 564.579   6
   1   6  -5 27545.0 623.420   6
   1   6  -4 2489.62 188.162   6
   1   6  -3 3837.20 222.404   6
   1   6  -2 15925.1 425.870   6
   1   6  -2 15226.1 359.744   5
   1   6  -1 51753.4 771.575   6
   1   6  -1 52403.5 708.696   5
   1   6   0 14760.8 382.062   5
   1   6   1 511.947 89.8300   5
   1   6   2 53876.7 803.420   5
   1   6   3 70233.5 983.050   5
   1   6   4 14699.6 461.628   5
   1   6   5 7011.55 355.672   5
   1   6  11 14157.9 475.245   6
   1   6  12 10092.7 413.584   6
   1   6  13 648.972 140.137   6
   1   6  14 197.763 98.5579   6
   1   6  15 3064.96 262.106   6
   1   6  16 4106.59 317.130   6
   1   6  17 341.257 129.501   6
   1   7  -4 28911.5 651.010   6
   1   7  -3 14287.6 431.410   6
   1   7  -2 167.197 55.2742   5
   1   7  -2 185.585 78.6003   6
   1   7  -1 752.556 104.288   5
   1   7  -1 658.203 102.461   6
   1   7   0 25221.5 533.110   5
   1   7   0 24213.5 535.742   6
   1   7   1 5407.27 255.217   5
   1   7   2 664.343 112.139   5
   1   7   3 13727.1 436.788   5
   1   7   4 25527.5 622.515   5
   1   7   5 13027.8 460.218   5
   1   7  11 2455.16 200.199   6
   1   7  12 9649.71 408.278   6
   1   7  13 9068.57 406.813   6
   1   7  14 4707.24 306.979   6
   1   7  15 536.119 136.509   6
   1   7  16 253.589 117.164   6
   1   7  17 4096.14 318.659   6
   1   8  -3 22177.3 509.916   5
   1   8  -2 27861.6 637.555   6
   1   8  -2 28095.7 584.465   5
   1   8  -1 6551.19 286.219   5
   1   8  -1 6201.53 297.436   6
   1   8   0 5460.32 265.435   5
   1   8   0 5526.98 275.120   6
   1   8   1 870.485 116.694   6
   1   8   1 799.353 118.730   5
   1   8   2 14690.1 456.247   5
   1   8   3 12463.3 434.788   5
   1   8  12 5168.56 301.494   6
   1   8  13 164.608 90.8691   6
   1   8  14 1574.92 191.029   6
   1   8  15 5042.37 332.429   6
   1   8  16 2253.45 234.626   6
   1   9  -3 1676.84 148.415   5
   1   9  -2 4910.65 254.283   5
   1   9  -1 20908.3 547.939   5
   1   9   0 10170.6 388.337   5
   1   9   1 8619.42 367.709   5
   1   9   1 7908.97 345.465   6
   1   9  13 2923.73 235.056   6
   1   9  14 2668.50 231.075   6
   1   9  15 741.734 142.058   6
   1  10  13-241.365 132.443   6
   1  10  14 1227.00 163.599   6
   1  10  15 2412.52 230.761   6
   1  11  14 236.817 84.6450   6
   2 -17  -1 565.832 224.683   5
   2 -17   0 2520.94 338.960   5
   2 -17   1 2348.99 329.738   5
   2 -17   2 1804.71 293.330   5
   2 -17   3 158.275 165.163   5
   2 -17   4 1929.84 302.991   5
   2 -17   5 3602.87 395.560   5
   2 -17   6 2913.63 364.303   5
   2 -17   7 301.122 193.855   5
   2 -17   8 888.560 217.103   5
   2 -16  -2 2034.18 354.536   5
   2 -16  -1 1392.11 288.152   5
   2 -16   0 364.416 189.894   5
   2 -16   1 895.471 214.473   5
   2 -16   2 4215.32 390.958   5
   2 -16   3 6989.72 502.520   5
   2 -16   4 596.963 189.009   5
   2 -16   5 1558.37 262.402   5
   2 -16   6 4112.04 391.580   5
   2 -16   7 6363.47 473.238   5
   2 -16   8 3062.27 339.420   5
   2 -16   9-284.583 214.957   5
   2 -16  10 2181.36 322.795   5
   2 -16  11 6723.70 531.980   5
   2 -15  -2-47.8532 147.677   5
   2 -15  -1 2631.76 338.689   5
   2 -15   0 4377.78 405.841   5
   2 -15   1 1846.14 262.859   5
   2 -15   2-88.8316 157.950   5
   2 -15   3 1164.86 219.540   5
   2 -15   4 5876.88 439.002   5
   2 -15   5 8308.74 510.642   5
   2 -15   6 3807.19 354.731   5
   2 -15   7 247.981 157.101   5
   2 -15   8 1835.63 281.644   5
   2 -15   9 7205.46 520.417   5
   2 -15  10 3961.80 413.233   5
   2 -15  10 3461.44 367.861   6
   2 -15  11 260.275 218.210   5
   2 -15  12 2000.87 315.450   5
   2 -15  13 3420.14 382.089   5
   2 -14  -3 8858.81 610.703   5
   2 -14  -2 7951.54 526.269   5
   2 -14  -1 3415.24 342.600   5
   2 -14   0 255.065 143.369   5
   2 -14   1 924.689 197.464   5
   2 -14   2 7624.94 482.126   5
   2 -14   3 6047.82 429.865   5
   2 -14   4 642.699 146.367   5
   2 -14   5 1712.61 222.363   5
   2 -14   6 7048.48 471.048   5
   2 -14   7 3756.96 370.839   5
   2 -14   7 3274.96 326.993   6
   2 -14   8 3561.15 345.616   5
   2 -14   8 3236.49 337.587   6
   2 -14   9-100.204 171.845   6
   2 -14   9 126.188 139.575   5
   2 -14  10 1863.87 262.436   5
   2 -14  10 1532.65 264.003   6
   2 -14  11 5682.55 481.838   6
   2 -14  11 5464.46 451.360   5
   2 -14  12 3507.44 391.530   6
   2 -14  12 3241.14 371.299   5
   2 -14  13 64.6981 151.238   5
   2 -14  14 814.027 224.193   5
   2 -13  -3 2234.91 303.363   5
   2 -13  -2 1455.73 230.394   5
   2 -13  -1 7977.50 486.397   5
   2 -13   0 6592.25 435.312   5
   2 -13   1 5367.32 395.172   5
   2 -13   2 446.718 146.178   5
   2 -13   3 1801.96 232.431   5
   2 -13   4 9508.23 511.946   5
   2 -13   5 8763.66 502.330   5
   2 -13   6 3029.81 299.724   5
   2 -13   6 2617.02 271.389   6
   2 -13   7 488.891 172.444   5
   2 -13   7 213.580 132.686   6
   2 -13   8 3610.81 346.370   5
   2 -13   8 3532.73 343.480   6
   2 -13   9 10580.4 593.146   6
   2 -13   9 10332.6 564.105   5
   2 -13  10 3853.64 380.970   6
   2 -13  10 4285.00 382.767   5
   2 -13  11 164.652 147.617   6
   2 -13  11 71.3512 146.871   5
   2 -13  12 3154.61 355.886   6
   2 -13  12 3267.42 345.280   5
   2 -13  13 4350.00 415.530   5
   2 -13  13 4892.89 462.412   6
   2 -13  14 406.662 181.057   5
   2 -13  15 135.622 161.129   5
   2 -12  -4 3515.56 383.323   5
   2 -12  -3 5075.30 386.533   5
   2 -12  -2 7145.10 449.646   5
   2 -12  -1 2767.19 282.823   5
   2 -12   0 1073.62 182.704   5
   2 -12   1 5523.79 374.427   5
   2 -12   2 12901.8 557.963   5
   2 -12   3 7515.69 431.775   5
   2 -12   4-16.9667 114.625   6
   2 -12   4 325.395 142.067   5
   2 -12   5 4611.99 360.904   5
   2 -12   5 4447.97 331.302   6
   2 -12   6 8864.89 479.110   5
   2 -12   6 9002.65 489.743   6
   2 -12   7 1922.28 241.009   6
   2 -12   7 2061.47 248.249   5
   2 -12   8 451.731 166.235   5
   2 -12   8 431.719 139.499   6
   2 -12   9 1657.58 245.388   6
   2 -12   9 1680.80 249.886   5
   2 -12  10 5681.97 421.924   5
   2 -12  10 5784.58 440.590   6
   2 -12  11 7498.38 489.809   5
   2 -12  11 7681.23 528.624   6
   2 -12  12 1690.27 240.298   5
   2 -12  12 2250.45 308.541   6
   2 -12  13 237.097 143.432   5
   2 -12  13 287.420 175.844   6
   2 -12  14 2252.43 292.098   5
   2 -12  14 3188.34 377.603   6
   2 -12  15 1938.72 295.621   5
   2 -12  16 1092.45 228.613   5
   2 -11  -4 7787.38 495.526   5
   2 -11  -3 509.632 140.020   5
   2 -11  -2 2030.94 244.124   5
   2 -11  -1 6781.26 402.012   5
   2 -11   0 8176.28 429.722   5
   2 -11   1 29.9953 131.052   5
   2 -11   2-43.1286 142.386   5
   2 -11   3 4750.51 339.943   5
   2 -11   3 4710.43 307.078   6
   2 -11   4 13564.2 554.759   5
   2 -11   4 13622.7 537.701   6
   2 -11   5 5024.87 338.751   6
   2 -11   5 5302.51 352.397   5
   2 -11   6-8.58116 94.8590   5
   2 -11   6 34.1915 104.494   6
   2 -11   7 10134.0 512.081   6
   2 -11   7 9816.29 500.573   5
   2 -11   8 3989.85 340.239   6
   2 -11   8 3899.26 331.012   5
   2 -11   9 4561.84 384.799   6
   2 -11   9 4439.94 351.048   5
   2 -11  10 37.8873 141.992   5
   2 -11  10 191.359 141.754   6
   2 -11  11 1766.52 231.358   5
   2 -11  11 1750.18 260.322   6
   2 -11  12 3571.34 372.482   6
   2 -11  12 2914.06 308.386   5
   2 -11  13 2155.77 261.213   5
   2 -11  13 2512.51 325.468   6
   2 -11  14-5.71679 152.288   5
   2 -11  14 296.222 163.630   6
   2 -11  15 302.134 143.727   5
   2 -11  15 1106.48 274.497   6
   2 -11  16 1585.33 256.751   5
   2 -11  17 1842.77 276.340   5
   2 -10  -4 2908.74 303.865   5
   2 -10  -3 10657.2 492.907   5
   2 -10  -2 8869.68 438.262   5
   2 -10  -1 690.048 146.660   5
   2 -10   0 1528.77 182.363   5
   2 -10   1 12092.2 491.239   5
   2 -10   2 11447.5 492.064   5
   2 -10   2 10575.7 423.072   6
   2 -10   3 3141.37 263.158   5
   2 -10   3 2908.48 242.834   6
   2 -10   4 250.584 97.9499   6
   2 -10   4 108.413 87.9974   5
   2 -10   5 6192.62 365.329   6
   2 -10   5 6079.65 363.002   5
   2 -10   6 10311.4 485.900   6
   2 -10   6 10054.0 473.094   5
   2 -10   7 6582.70 404.749   6
   2 -10   7 6444.84 390.551   5
   2 -10   8 1110.39 164.804   5
   2 -10   8 1298.54 212.611   6
   2 -10   9 3117.04 314.410   6
   2 -10   9 2934.50 267.503   5
   2 -10  10 10599.0 561.962   6
   2 -10  10 9529.10 502.008   5
   2 -10  11 5121.42 378.079   5
   2 -10  11 5097.16 401.785   6
   2 -10  12-47.1923 129.911   6
   2 -10  12-86.7010 170.417   5
   2 -10  13 2142.66 284.409   6
   2 -10  13 1821.72 251.642   5
   2 -10  14 4389.64 415.639   6
   2 -10  14 4502.74 395.564   5
   2 -10  15 3973.34 423.881   6
   2 -10  15 3442.14 340.316   5
   2 -10  16 775.248 222.775   6
   2 -10  16 189.516 152.789   5
   2 -10  17 379.423 175.250   5
   2  -9  -4 4672.13 331.052   5
   2  -9  -3 2406.93 221.658   5
   2  -9  -2 2415.97 226.719   5
   2  -9  -1 10309.7 436.239   5
   2  -9   0 8079.80 380.726   5
   2  -9   1 96.1853 70.3156   6
   2  -9   1 270.503 119.657   5
   2  -9   2 1717.29 194.358   5
   2  -9   2 1921.24 180.567   6
   2  -9   3 10180.1 412.242   6
   2  -9   3 11118.0 457.144   5
   2  -9   4 12781.8 477.781   6
   2  -9   4 12377.9 486.691   5
   2  -9   5 906.709 145.516   5
   2  -9   5 934.171 160.232   6
   2  -9   6 2901.57 260.047   6
   2  -9   6 3019.22 257.741   5
   2  -9   7 12957.5 534.484   6
   2  -9   7 13059.1 524.206   5
   2  -9   8 12244.7 536.511   6
   2  -9   8 12100.6 509.101   5
   2  -9   9 7.25617 132.965   5
   2  -9   9 203.123 141.164   6
   2  -9  10 677.747 160.039   6
   2  -9  10 487.440 139.960   5
   2  -9  11 4385.45 358.065   6
   2  -9  11 4664.97 356.199   5
   2  -9  12 10180.7 554.427   6
   2  -9  12 9759.24 521.744   5
   2  -9  13 2831.93 319.629   6
   2  -9  14 156.914 147.931   6
   2  -9  15 2101.65 306.341   6
   2  -9  16 6977.16 527.642   6
   2  -9  17 5283.01 486.694   6
   2  -8  -4 9751.98 439.475   5
   2  -8  -3 11079.4 447.726   5
   2  -8  -2 6313.35 331.278   5
   2  -8  -1 399.844 96.6541   5
   2  -8   0 9523.41 398.077   5
   2  -8   1 19450.9 564.561   5
   2  -8   1 20115.3 509.443   6
   2  -8   2 7484.55 322.189   6
   2  -8   2 7660.12 356.367   5
   2  -8   3 81.5594 82.7559   5
   2  -8   3 48.4636 78.7548   6
   2  -8   4 7040.03 338.632   6
   2  -8   4 6938.93 350.261   5
   2  -8   5 11618.0 449.194   6
   2  -8   5 11596.3 454.420   5
   2  -8   6 7157.36 366.663   6
   2  -8   6 7111.70 362.130   5
   2  -8   7 1102.74 165.316   6
   2  -8   7 821.818 141.045   5
   2  -8   8 543.177 140.169   6
   2  -8   8 609.024 120.985   5
   2  -8   9 19159.7 681.144   6
   2  -8  10 14534.0 610.634   6
   2  -8  11 2432.59 280.403   6
   2  -8  12 109.399 131.894   6
   2  -8  13 9164.31 542.323   6
   2  -8  14 8151.81 531.079   6
   2  -8  15 3000.99 344.439   6
   2  -8  16 289.199 156.825   6
   2  -8  17 1956.55 309.305   6
   2  -7  -4 1958.29 203.396   5
   2  -7  -3 1192.04 145.592   5
   2  -7  -2 12540.4 438.865   5
   2  -7  -1 15477.7 469.960   5
   2  -7   0 2215.77 194.463   5
   2  -7   0 2038.07 145.919   6
   2  -7   1 88.6481 74.8220   5
   2  -7   1 84.3710 68.2715   6
   2  -7   2 19383.7 491.337   6
   2  -7   2 19867.7 546.674   5
   2  -7   3 21838.0 542.089   6
   2  -7   3 22253.9 586.892   5
   2  -7   4 22685.9 578.755   6
   2  -7   4 23405.8 607.590   5
   2  -7   5 2677.63 218.144   6
   2  -7   5 2429.28 205.449   5
   2  -7   6 4074.00 266.065   5
   2  -7   6 4573.50 291.540   6
   2  -7   7 18419.0 598.529   6
   2  -7   8 16790.9 589.594   6
   2  -7   9 4928.07 331.488   6
   2  -7  10 547.197 161.381   6
   2  -7  11 10307.5 513.860   6
   2  -7  12 12569.9 586.197   6
   2  -7  13 13609.1 624.520   6
   2  -7  14 187.221 120.598   6
   2  -7  15 3879.44 363.673   6
   2  -7  16 8145.06 543.661   6
   2  -7  17 5304.51 454.957   6
   2  -7  18 939.113 248.488   6
   2  -6  -4 18066.6 528.848   5
   2  -6  -3 4479.58 255.372   5
   2  -6  -2 333.105 83.5203   5
   2  -6  -1 5648.84 273.847   5
   2  -6   0 12811.9 404.345   5
   2  -6   0 12887.8 332.624   6
   2  -6   1 15161.9 385.308   6
   2  -6   1 15250.0 447.211   5
   2  -6   2 10706.4 338.136   6
   2  -6   2 11050.0 383.700   5
   2  -6   3 2036.85 169.710   5
   2  -6   3 2249.65 174.415   6
   2  -6   4 28930.0 650.041   5
   2  -6   4 28354.7 629.060   6
   2  -6   5 48499.2 864.503   6
   2  -6   6 10435.8 415.510   6
   2  -6   7 200.107 96.2574   6
   2  -6   8 19195.5 603.283   6
   2  -6   9 27736.2 758.207   6
   2  -6  10 24884.7 740.585   6
   2  -6  11 6759.23 402.461   6
   2  -6  12 1900.04 238.497   6
   2  -6  13 12356.9 583.525   6
   2  -6  14 19083.4 742.025   6
   2  -6  15 5402.69 425.653   6
   2  -6  16 58.0424 131.782   6
   2  -6  17 4268.84 409.047   6
   2  -6  18 8267.61 568.407   6
   2  -6  19 4652.83 462.397   6
   2  -5  -4 303.555 90.7038   5
   2  -5  -3 12629.7 393.245   5
   2  -5  -2 32731.8 613.162   5
   2  -5  -1 17897.9 459.902   5
   2  -5  -1 17124.7 327.381   6
   2  -5   0 377.357 73.2438   6
   2  -5   0 328.563 90.5229   5
   2  -5   1 16519.7 375.273   6
   2  -5   1 16726.5 437.742   5
   2  -5   2 43850.1 727.110   5
   2  -5   2 44264.1 670.404   6
   2  -5   3 36053.1 645.557   6
   2  -5   3 36604.3 676.207   5
   2  -5   4 14829.7 430.605   6
   2  -5   5 73.9065 91.7583   6
   2  -5   6 30403.5 686.495   6
   2  -5   7 28122.3 689.466   6
   2  -5   8 18140.0 570.949   6
   2  -5   9 83.5713 94.0878   6
   2  -5  10 6572.70 375.315   6
   2  -5  11 18015.6 637.992   6
   2  -5  12 16193.2 628.147   6
   2  -5  13 3041.38 293.831   6
   2  -5  14 1194.27 209.818   6
   2  -5  15 6418.59 447.048   6
   2  -5  16 7893.35 504.629   6
   2  -5  17 2598.45 335.838   6
   2  -5  18 82.8835 165.800   6
   2  -5  19 2704.25 348.510   6
   2  -4  -4 13780.5 417.520   5
   2  -4  -3 7780.54 281.349   5
   2  -4  -2 128.788 68.4690   5
   2  -4  -1 29891.0 540.834   5
   2  -4  -1 30446.5 399.485   6
   2  -4   0 69845.2 868.029   5
   2  -4   0 67188.0 705.572   6
   2  -4   1 34238.9 587.538   5
   2  -4   1 33592.0 511.871   6
   2  -4   2 388.867 75.7151   6
   2  -4   2 418.834 80.5900   5
   2  -4   3 27527.0 530.863   6
   2  -4   4 56728.8 831.503   6
   2  -4   5 41610.1 734.916   6
   2  -4   6 28780.4 633.607   6
   2  -4   7 10156.0 392.674   6
   2  -4   8 22908.1 618.423   6
   2  -4   9 27598.1 708.284   6
   2  -4  10 8761.68 417.106   6
   2  -4  11 847.030 145.393   6
   2  -4  12 4469.23 324.835   6
   2  -4  13 9923.52 494.210   6
   2  -4  14 12443.2 574.949   6
   2  -4  15 1331.43 207.912   6
   2  -4  16 616.102 188.048   6
   2  -4  17 3398.66 352.954   6
   2  -4  18 2491.62 325.915   6
   2  -4  19 6.53638 160.420   6
   2  -4  20 732.923 233.992   6
   2  -3  -4 5254.31 261.994   5
   2  -3  -3 35262.1 556.474   5
   2  -3  -2 47077.2 627.004   5
   2  -3  -1 37129.9 388.415   6
   2  -3  -1 36748.8 549.576   5
   2  -3   0 17166.2 293.358   6
   2  -3   0 16974.4 372.546   5
   2  -3   1 9005.68 276.863   5
   2  -3   1 8838.68 235.861   6
   2  -3   2 21941.5 419.847   6
   2  -3   3 16978.0 392.162   6
   2  -3   4 2334.20 163.679   6
   2  -3   5 5988.77 268.101   6
   2  -3   6 43615.2 770.082   6
   2  -3   7 59090.0 951.986   6
   2  -3   8 2220.64 198.479   6
   2  -3   9 1795.85 183.955   6
   2  -3  10 4626.52 302.704   6
   2  -3  11 3837.80 280.351   6
   2  -3  12 119.849 103.055   6
   2  -3  13 3615.20 296.559   6
   2  -3  14 7307.60 434.377   6
   2  -3  15 6201.90 412.442   6
   2  -3  16 2053.19 262.565   6
   2  -3  17 113.683 137.748   6
   2  -3  18 848.417 213.440   6
   2  -3  19 4051.92 406.194   6
   2  -3  20 3285.01 380.698   6
   2  -2  -3 3542.12 157.452   5
   2  -2  -2 42.1534 45.8334   5
   2  -2  -1 23118.7 255.057   6
   2  -2  -1 21745.9 377.944   5
   2  -2   0 560679. 3090.56   6
   2  -2   1 209095. 1465.14   6
   2  -2   2 10557.6 278.913   6
   2  -2   3 42963.4 638.809   6
   2  -2   4 39985.1 638.744   6
   2  -2   5 9606.47 326.581   6
   2  -2   6 117.686 74.3901   6
   2  -2   7 3984.50 241.075   6
   2  -2   8 18541.2 531.257   6
   2  -2   9 14820.2 494.911   6
   2  -2  10 2644.43 225.466   6
   2  -2  11-72.2577 112.594   6
   2  -2  12 7098.46 386.993   6
   2  -2  13 9232.27 460.275   6
   2  -2  14 3903.43 313.655   6
   2  -2  15 300.747 142.967   6
   2  -2  16 6199.77 421.778   6
   2  -2  17 5385.62 406.881   6
   2  -2  18 3484.46 357.579   6
   2  -2  19 254.382 179.405   6
   2  -2  20 1351.79 267.075   6
   2  -1  -9 306.044 74.1766   6
   2  -1  -8 12544.3 314.850   6
   2  -1  -7 29158.9 445.808   6
   2  -1  -6 40351.1 476.247   6
   2  -1  -5 7174.09 162.547   6
   2  -1  -4 1489.06 67.1528   6
   2  -1  -3 21734.6 343.708   5
   2  -1  -2 21608.6 325.124   5
   2  -1  -1 11328.8 229.229   5
   2  -1   0 115.465 50.3513   6
   2  -1   1 121357. 974.558   6
   2  -1   2 667.936 87.5524   6
   2  -1   3 6049.55 229.854   6
   2  -1   4 48.3188 65.8419   6
   2  -1   5 6793.24 279.205   6
   2  -1   6 35821.6 669.448   6
   2  -1   7 10397.9 373.703   6
   2  -1   8 2300.17 192.178   6
   2  -1   9 14266.3 474.895   6
   2  -1  10 21765.0 612.463   6
   2  -1  11 4076.64 280.578   6
   2  -1  12 148.059 98.8172   6
   2  -1  13 4686.35 327.080   6
   2  -1  14 13737.2 566.584   6
   2  -1  15 7686.48 445.749   6
   2  -1  16 439.471 140.423   6
   2  -1  17 550.106 154.856   6
   2  -1  18 1066.78 206.917   6
   2  -1  19 8043.15 532.547   6
   2  -1  20 3655.99 383.909   6
   2  -1  21 258.765 169.783   6
   2   0 -12 2843.64 211.986   6
   2   0 -11 1514.35 156.125   6
   2   0 -10 10919.3 358.410   6
   2   0  -9 14870.5 391.744   6
   2   0  -8 7232.20 252.738   6
   2   0  -7 8246.15 251.700   6
   2   0  -6 21321.7 370.500   6
   2   0  -5 25989.8 372.050   6
   2   0  -4 17401.8 273.261   6
   2   0  -3 2604.81 94.0047   6
   2   0  -2 1479.91 58.7439   5
   2   0   3 35955.1 553.811   6
   2   0   4 3798.49 203.060   6
   2   0   5 262.952 83.0990   6
   2   0   6 4783.96 239.803   6
   2   0   7 11085.5 377.684   6
   2   0   8 13507.0 448.124   6
   2   0   9 2628.22 211.324   6
   2   0  10 60.7236 82.7300   6
   2   0  11 3435.79 252.775   6
   2   0  12 18156.5 595.085   6
   2   0  13 14880.9 562.068   6
   2   0  14 5306.22 355.840   6
   2   0  15 451.320 135.093   6
   2   0  16 9129.48 496.838   6
   2   0  17 6639.98 435.983   6
   2   0  18 1546.51 244.353   6
   2   0  19-8.20426 161.447   6
   2   0  20 2013.64 290.031   6
   2   0  21 2604.83 350.687   6
   2   1 -11 11785.2 411.870   6
   2   1 -10 477.187 100.571   6
   2   1  -9 274.361 75.1067   6
   2   1  -8 7334.16 270.581   6
   2   1  -7 9745.63 290.783   6
   2   1  -6 13712.4 325.460   6
   2   1  -5 1877.53 120.568   6
   2   1  -4 22842.5 368.302   6
   2   1  -3 9809.41 218.520   6
   2   1   5 24171.8 517.551   6
   2   1   6 36153.3 667.771   6
   2   1   7 17449.3 471.814   6
   2   1   8 1490.66 155.254   6
   2   1   9 19612.2 545.899   6
   2   1  10 24109.4 645.679   6
   2   1  11 4823.87 302.281   6
   2   1  12 5268.32 321.607   6
   2   1  13 3358.78 271.089   6
   2   1  14 17351.1 621.077   6
   2   1  15 12666.3 554.407   6
   2   1  16 1634.61 223.934   6
   2   1  17 1377.05 203.434   6
   2   1  18 6420.30 441.085   6
   2   1  19 5846.21 433.638   6
   2   1  20 4839.37 418.470   6
   2   1  21 238.388 162.230   6
   2   2 -11 5957.73 312.295   6
   2   2 -10 13221.4 437.146   6
   2   2  -9 7176.55 302.591   6
   2   2  -8 4779.55 232.640   6
   2   2  -7 1082.86 115.293   6
   2   2  -6 1753.89 133.560   6
   2   2  -5 19339.6 396.941   6
   2   2  -4 3367.76 160.422   6
   2   2  -3 271.114 57.6313   6
   2   2   7 8210.49 332.430   6
   2   2   8 27972.6 637.584   6
   2   2   9 9875.02 385.982   6
   2   2  10 1182.83 146.652   6
   2   2  11 20226.1 601.340   6
   2   2  12 9746.78 436.774   6
   2   2  13 16230.5 583.373   6
   2   2  14-27.2432 108.976   6
   2   2  15 3789.23 306.139   6
   2   2  16 8296.64 463.788   6
   2   2  17 5049.18 381.005   6
   2   2  18 675.201 175.795   6
   2   2  19 407.908 135.976   6
   2   2  20 2302.50 298.516   6
   2   2  21 2570.61 318.678   6
   2   3 -10 4065.51 256.029   6
   2   3  -9 15333.5 464.565   6
   2   3  -8 13277.7 416.091   6
   2   3  -7 7488.31 297.347   6
   2   3  -6 373.234 88.6677   6
   2   3  -5 17661.5 412.368   6
   2   3  -4 59576.6 753.465   6
   2   3  -3 49167.1 657.865   6
   2   3  -2 9164.26 152.576   5
   2   3  -1 15500.2 253.729   5
   2   3   8 11643.1 411.606   6
   2   3   9 35064.2 748.619   6
   2   3  10 27930.5 680.674   6
   2   3  11 7690.22 369.404   6
   2   3  12 2335.52 215.748   6
   2   3  13 1965.87 218.221   6
   2   3  14 15351.2 586.744   6
   2   3  15 6748.68 402.209   6
   2   3  16 186.629 113.475   6
   2   3  17 1498.61 230.418   6
   2   3  18 4650.73 377.860   6
   2   3  19 2761.80 299.039   6
   2   3  20 409.129 151.310   6
   2   4  -8 306.701 93.1023   6
   2   4  -7 11208.3 388.261   6
   2   4  -6 28649.2 595.385   6
   2   4  -5 7764.43 296.799   6
   2   4  -4 3658.16 199.681   6
   2   4  -3 38173.1 620.386   6
   2   4  -2 26917.7 497.472   6
   2   4  -2 26063.9 342.801   5
   2   4  -1 79325.3 738.145   5
   2   4   0 6726.51 227.472   5
   2   4   9 3260.70 233.615   6
   2   4  10 4259.12 272.412   6
   2   4  11 14962.9 518.138   6
   2   4  12 19421.9 605.784   6
   2   4  13 1747.82 206.119   6
   2   4  14-52.0823 109.069   6
   2   4  15 2768.12 264.921   6
   2   4  16 7170.30 428.541   6
   2   4  17 1764.68 237.997   6
   2   4  18 88.8376 117.009   6
   2   4  19 117.203 138.930   6
   2   4  20 756.529 180.814   6
   2   5  -7 5426.70 286.371   6
   2   5  -6 1143.35 139.974   6
   2   5  -5 13860.3 424.782   6
   2   5  -4 51405.1 798.801   6
   2   5  -3 53029.9 796.595   6
   2   5  -3 52335.2 574.465   5
   2   5  -2 474.821 70.3658   5
   2   5  -2 500.283 96.7680   6
   2   5  -1 26039.2 423.836   5
   2   5   0 105124. 1027.15   5
   2   5   1 100386. 1122.78   5
   2   5  10 15881.3 525.457   6
   2   5  11 2600.14 224.918   6
   2   5  12 2945.90 241.843   6
   2   5  13 12356.7 500.901   6
   2   5  14 6515.96 380.438   6
   2   5  15 159.391 105.965   6
   2   5  16 117.878 112.934   6
   2   5  17 2509.18 276.438   6
   2   5  18 1853.63 243.256   6
   2   5  19 569.483 169.846   6
   2   6  -5 18818.4 519.535   6
   2   6  -4 5515.37 276.751   6
   2   6  -3 51773.5 838.760   6
   2   6  -3 51824.2 641.448   5
   2   6  -2 70559.1 983.938   6
   2   6  -2 70605.1 790.168   5
   2   6  -1 35526.9 569.828   5
   2   6   0 10296.8 312.141   5
   2   6   1 5510.09 244.573   5
   2   6   2 50938.6 847.039   5
   2   6  11 17525.1 566.573   6
   2   6  12 4274.78 291.829   6
   2   6  13 67.5278 94.3030   6
   2   6  14 1175.36 176.813   6
   2   6  15 3487.20 292.036   6
   2   6  16 2697.01 271.780   6
   2   6  17 542.935 155.720   6
   2   6  18 568.315 155.455   6
   2   6  19 1822.99 238.186   6
   2   7  -4 40315.2 786.879   6
   2   7  -3 17326.7 508.932   6
   2   7  -3 16762.0 385.951   5
   2   7  -2 2234.08 187.204   6
   2   7  -2 2178.73 147.963   5
   2   7  -1 21579.0 464.234   5
   2   7  -1 21130.7 546.521   6
   2   7   0 24988.0 526.601   5
   2   7   1 8792.55 328.662   5
   2   7   2 374.092 95.1152   5
   2   7   3 4033.68 253.218   5
   2   7   4 25514.5 707.383   5
   2   7  12 3865.15 282.138   6
   2   7  13 6077.81 359.796   6
   2   7  14 2944.20 258.952   6
   2   7  15-166.025 122.154   6
   2   7  16 2401.13 248.800   6
   2   7  17 3318.40 306.378   6
   2   7  18 1471.18 222.202   6
   2   8  -3 26929.6 536.842   5
   2   8  -2 13649.8 386.254   5
   2   8  -1 5147.50 286.391   6
   2   8  -1 5544.96 255.874   5
   2   8   0 329.678 82.8199   5
   2   8   1 14003.8 437.159   5
   2   8   2 15136.0 483.583   5
   2   8   3 4793.55 285.519   5
   2   8  13 504.479 114.165   6
   2   8  14 2065.45 222.785   6
   2   8  15 3551.69 291.300   6
   2   8  16 1177.13 176.970   6
   2   8  17-286.954 136.599   6
   2   9  -3 228.179 64.9031   5
   2   9  -2 11037.0 373.752   5
   2   9  -1 24837.9 582.282   5
   2   9   0 6975.32 321.992   5
   2   9   1 3373.83 234.320   5
   2   9  13 2904.90 258.310   6
   2   9  14 164.231 109.054   6
   2   9  15-48.6200 132.081   6
   2   9  16 2829.61 266.548   6
   2   9  17 3202.59 300.607   6
   2  10  -3 6193.70 294.566   5
   2  10  -2 4893.75 266.502   5
   2  10  14 2918.53 258.984   6
   2  10  15 2730.21 256.470   6
   2  10  16 134.456 105.892   6
   2  11  14 22.1878 107.049   6
   2  11  15-11.5922 125.496   6
   2  12  15 1540.32 196.176   6
   3 -17  -2 233.915 211.012   5
   3 -17  -1 8.58439 172.782   5
   3 -17   0 1398.26 292.966   5
   3 -17   1 1634.19 305.417   5
   3 -17   2 717.384 213.415   5
   3 -17   3 794.343 212.359   5
   3 -17   4 3844.02 420.839   5
   3 -17   5 3870.92 421.000   5
   3 -16  -3 1140.63 313.180   5
   3 -16  -2 2268.85 356.785   5
   3 -16  -1 1700.34 302.389   5
   3 -16   0 199.042 153.661   5
   3 -16   1 465.731 180.996   5
   3 -16   2 978.004 233.592   5
   3 -16   3 774.153 229.447   5
   3 -16   4-376.514 196.426   5
   3 -16   5 566.461 192.646   5
   3 -16   6 932.919 195.655   5
   3 -16   7 1040.65 186.852   5
   3 -16   8 855.548 225.984   5
   3 -16   9-26.2242 176.147   5
   3 -15  -3 1199.17 283.840   5
   3 -15  -2-34.0538 148.684   5
   3 -15  -1 1293.85 252.940   5
   3 -15   0 2265.10 297.997   5
   3 -15   1 2072.55 289.899   5
   3 -15   2 295.456 156.448   5
   3 -15   3 205.563 139.000   5
   3 -15   4 2856.48 322.697   5
   3 -15   5 3497.22 356.699   5
   3 -15   6 601.964 167.007   5
   3 -15   7 112.479 157.764   5
   3 -15   8 1037.74 210.790   6
   3 -15   8 1320.87 258.249   5
   3 -15   9 2631.87 329.553   6
   3 -15   9 2791.08 352.175   5
   3 -15  10 1041.37 246.927   6
   3 -15  10 1407.44 266.294   5
   3 -15  11 427.501 207.781   5
   3 -14  -4 336.924 196.783   5
   3 -14  -3 2178.01 304.193   5
   3 -14  -2 2961.23 337.290   5
   3 -14  -1 652.382 189.351   5
   3 -14   0-31.1335 183.980   5
   3 -14   1 2238.06 288.661   5
   3 -14   2 3916.15 358.139   5
   3 -14   3 1585.86 225.308   5
   3 -14   4 103.454 125.112   5
   3 -14   5 4663.07 409.356   5
   3 -14   6 9319.43 571.928   5
   3 -14   6 9552.95 536.480   6
   3 -14   7 999.054 204.091   6
   3 -14   7 819.561 204.552   5
   3 -14   8 534.807 153.363   6
   3 -14   8 372.741 154.925   5
   3 -14   9 974.327 218.480   6
   3 -14   9 886.114 208.539   5
   3 -14  10 5009.26 440.632   6
   3 -14  10 4931.48 433.467   5
   3 -14  11 5905.09 493.565   6
   3 -14  11 6292.06 503.597   5
   3 -14  12 2258.06 323.818   5
   3 -14  13-65.6758 165.398   5
   3 -13  -4 1875.71 301.255   5
   3 -13  -3 286.385 161.251   5
   3 -13  -2 1829.42 260.877   5
   3 -13  -1 4329.78 369.807   5
   3 -13   0 3696.09 340.430   5
   3 -13   1 566.251 135.478   5
   3 -13   2 502.877 145.329   5
   3 -13   3 5829.30 410.052   5
   3 -13   4 7067.95 469.360   5
   3 -13   5 2424.60 263.452   6
   3 -13   5 2414.13 282.512   5
   3 -13   6 82.8940 129.236   6
   3 -13   6-56.5304 133.295   5
   3 -13   7 8415.47 500.091   6
   3 -13   7 8457.99 513.923   5
   3 -13   8 5430.54 430.008   6
   3 -13   8 5486.81 426.361   5
   3 -13   9 7362.00 508.451   6
   3 -13   9 7906.37 519.920   5
   3 -13  10 1119.36 224.707   5
   3 -13  10 1368.35 250.936   6
   3 -13  11 1087.87 230.793   5
   3 -13  11 1078.52 246.110   6
   3 -13  12 5002.59 459.363   6
   3 -13  12 4724.02 436.202   5
   3 -13  13 5433.59 500.342   6
   3 -13  13 4762.64 433.894   5
   3 -13  14 454.678 196.646   5
   3 -12  -4 2504.32 311.141   5
   3 -12  -3 5416.98 406.563   5
   3 -12  -2 3581.20 330.073   5
   3 -12  -1 95.6562 118.220   5
   3 -12   0 8602.18 477.979   5
   3 -12   1 11467.4 546.165   5
   3 -12   2 9952.04 511.042   5
   3 -12   3 2997.60 316.928   5
   3 -12   3 2680.27 251.071   6
   3 -12   4 1035.48 169.537   6
   3 -12   4 1087.27 196.390   5
   3 -12   5 8968.55 478.410   6
   3 -12   5 8815.01 490.919   5
   3 -12   6 11659.8 557.130   6
   3 -12   6 11097.7 556.966   5
   3 -12   7 5672.39 400.993   6
   3 -12   7 5941.67 430.754   5
   3 -12   8 958.474 199.879   6
   3 -12   8 741.797 167.570   5
   3 -12   9 3747.82 365.887   6
   3 -12   9 3627.40 355.422   5
   3 -12  10 10172.1 594.151   6
   3 -12  10 8929.76 542.852   5
   3 -12  11 7338.22 531.002   6
   3 -12  11 7607.42 514.802   5
   3 -12  12 1565.49 257.532   5
   3 -12  12 1726.81 293.502   6
   3 -12  13 710.268 198.858   5
   3 -12  13 644.952 204.754   6
   3 -12  14 2813.87 335.488   5
   3 -12  14 3587.29 408.934   6
   3 -12  15 2708.20 355.823   5
   3 -12  16 1014.46 239.868   5
   3 -11  -5 6412.35 493.145   5
   3 -11  -4 3526.38 318.895   5
   3 -11  -3 356.708 148.854   5
   3 -11  -2 4575.31 353.780   5
   3 -11  -1 6944.20 424.199   5
   3 -11   0 4406.10 327.114   5
   3 -11   1 503.552 131.267   5
   3 -11   2 4836.58 358.564   5
   3 -11   2 4112.40 282.900   6
   3 -11   3 12416.3 551.711   5
   3 -11   3 11989.2 494.949   6
   3 -11   4 12996.3 527.618   6
   3 -11   4 13282.4 571.678   5
   3 -11   5 2097.98 250.462   5
   3 -11   5 2129.78 231.817   6
   3 -11   6 1251.53 203.116   5
   3 -11   6 1106.97 187.384   6
   3 -11   7 8295.52 480.345   6
   3 -11   7 7709.56 460.328   5
   3 -11   8 13797.2 625.807   6
   3 -11   8 13630.7 619.532   5
   3 -11   9 1584.60 219.096   5
   3 -11   9 2079.37 275.517   6
   3 -11  10-109.500 160.770   5
   3 -11  10 82.7638 157.666   6
   3 -11  11 1910.22 252.339   5
   3 -11  11 1829.21 266.746   6
   3 -11  12 4742.51 426.890   6
   3 -11  12 4289.27 385.893   5
   3 -11  13 2850.02 351.343   6
   3 -11  13 2543.65 300.935   5
   3 -11  14 238.203 162.775   6
   3 -11  14 46.9140 167.265   5
   3 -11  15 1099.14 269.586   6
   3 -11  15 552.638 164.187   5
   3 -11  16 1812.08 266.370   5
   3 -11  17 1644.29 270.320   5
   3 -10  -5 734.283 195.820   5
   3 -10  -4 9340.80 483.914   5
   3 -10  -3 13238.2 558.255   5
   3 -10  -2 11382.6 509.013   5
   3 -10  -1 21.3309 104.488   5
   3 -10   0 7355.78 398.609   5
   3 -10   1 28001.9 794.382   5
   3 -10   1 26898.3 657.720   6
   3 -10   2 7894.59 418.269   5
   3 -10   2 7976.25 370.039   6
   3 -10   3 625.021 138.929   5
   3 -10   3 685.191 138.505   6
   3 -10   4 3310.85 275.102   6
   3 -10   4 3839.80 303.717   5
   3 -10   5 11463.6 496.525   6
   3 -10   5 12282.4 541.606   5
   3 -10   6 11482.1 519.072   6
   3 -10   6 12394.0 550.801   5
   3 -10   7 1672.31 223.081   5
   3 -10   7 1749.65 226.232   6
   3 -10   8 849.807 151.975   5
   3 -10   8 980.137 186.003   6
   3 -10   9 5111.80 388.074   6
   3 -10   9 5216.20 374.579   5
   3 -10  10 7481.46 466.808   6
   3 -10  10 7022.90 457.432   5
   3 -10  11 3124.06 331.993   6
   3 -10  11 2676.55 294.075   5
   3 -10  12 125.213 125.669   6
   3 -10  12-10.3117 162.110   5
   3 -10  13 2929.29 334.075   6
   3 -10  13 2546.78 308.665   5
   3 -10  14 6293.11 485.636   6
   3 -10  14 5926.57 463.759   5
   3 -10  15 3154.91 371.594   6
   3 -10  15 2714.67 338.543   5
   3 -10  16-189.335 182.367   5
   3 -10  17 872.976 209.117   5
   3 -10  18 1376.44 282.948   5
   3  -9  -5 5917.51 424.789   5
   3  -9  -4 909.070 179.271   5
   3  -9  -3 1915.87 213.300   5
   3  -9  -2 14244.8 545.628   5
   3  -9  -1 14428.8 535.638   5
   3  -9   0 3204.46 266.784   5
   3  -9   1 79.4041 82.5590   6
   3  -9   1 50.8691 94.8440   5
   3  -9   2 9629.21 387.476   6
   3  -9   2 9630.30 440.750   5
   3  -9   3 8226.17 376.309   6
   3  -9   3 8707.35 424.337   5
   3  -9   4 5265.90 312.436   6
   3  -9   4 5235.95 336.556   5
   3  -9   5 803.678 153.116   5
   3  -9   5 706.216 146.485   6
   3  -9   6 119.610 118.996   5
   3  -9   6 292.280 120.811   6
   3  -9   7 3192.59 287.142   6
   3  -9   7 2885.09 258.745   5
   3  -9   8 5827.60 389.015   6
   3  -9   8 5726.78 386.435   5
   3  -9   9 1235.45 198.691   5
   3  -9   9 1390.28 219.918   6
   3  -9  10 142.331 147.563   6
   3  -9  10-76.0720 151.808   5
   3  -9  11 4949.24 389.476   5
   3  -9  11 5597.54 417.518   6
   3  -9  12 5233.85 424.256   6
   3  -9  13 386.071 168.632   6
   3  -9  14 713.724 193.661   6
   3  -9  15 2696.21 342.911   6
   3  -9  16 3676.79 403.642   6
   3  -8  -5 2977.02 292.235   5
   3  -8  -4 10797.8 468.259   5
   3  -8  -3 8741.38 407.100   5
   3  -8  -2 1895.56 196.659   5
   3  -8  -1 179.012 85.0129   5
   3  -8   0 8818.81 401.600   5
   3  -8   0 8427.32 314.523   6
   3  -8   1 10290.0 427.296   5
   3  -8   1 9952.52 358.973   6
   3  -8   2 6289.57 301.021   6
   3  -8   2 6305.71 339.113   5
   3  -8   3-1.53000 86.0477   5
   3  -8   3 77.2531 71.9368   6
   3  -8   4 2671.01 217.287   6
   3  -8   4 3000.02 242.069   5
   3  -8   5 9345.01 421.661   6
   3  -8   5 9644.71 435.718   5
   3  -8   6 6743.74 376.830   5
   3  -8   6 6556.47 367.067   6
   3  -8   7 60.2907 94.0612   6
   3  -8   7 51.4356 100.160   5
   3  -8   8 2815.71 259.893   5
   3  -8   8 3135.94 286.644   6
   3  -8   9 5524.88 378.339   6
   3  -8  10 4496.96 353.350   6
   3  -8  11 1496.61 229.517   6
   3  -8  12 71.3582 119.955   6
   3  -8  13 3791.63 361.612   6
   3  -8  14 4465.76 397.473   6
   3  -8  15 1863.77 294.294   6
   3  -8  16 351.516 181.186   6
   3  -8  17 4442.72 444.855   6
   3  -7  -5 4016.97 302.962   5
   3  -7  -4 2875.11 231.418   5
   3  -7  -3 1560.92 172.483   5
   3  -7  -2 9006.43 383.211   5
   3  -7  -1 7237.73 347.458   5
   3  -7  -1 6911.66 244.546   6
   3  -7   0 1012.77 110.554   6
   3  -7   0 1016.37 146.607   5
   3  -7   1 651.730 122.351   5
   3  -7   1 608.753 100.937   6
   3  -7   2 7291.20 299.762   6
   3  -7   2 7671.05 356.894   5
   3  -7   3 7700.04 358.965   5
   3  -7   3 7699.31 333.962   6
   3  -7   4 4477.27 276.832   5
   3  -7   4 4550.53 268.576   6
   3  -7   5 282.897 101.413   6
   3  -7   5 225.832 81.8835   5
   3  -7   6 6317.10 349.010   5
   3  -7   6 6464.51 352.846   6
   3  -7   7 2001.81 221.226   6
   3  -7   8 3552.35 287.575   6
   3  -7   9 36.5829 105.937   6
   3  -7  10 2168.75 250.368   6
   3  -7  11 15127.2 636.618   6
   3  -7  12 13428.1 616.605   6
   3  -7  13 3953.13 355.364   6
   3  -7  14 3124.10 332.641   6
   3  -7  15 8170.53 539.316   6
   3  -7  16 6256.98 487.700   6
   3  -7  17 1971.63 311.529   6
   3  -7  18 213.978 184.002   6
   3  -6  -5 8244.61 400.370   5
   3  -6  -4 7469.25 342.776   5
   3  -6  -3 6001.97 298.032   5
   3  -6  -2 1173.05 138.648   5
   3  -6  -1 7154.36 323.779   5
   3  -6  -1 7020.11 227.143   6
   3  -6   0 4640.13 200.513   6
   3  -6   0 4654.24 261.740   5
   3  -6   1 2553.37 164.665   6
   3  -6   1 2481.97 198.606   5
   3  -6   2 265.403 76.2899   5
   3  -6   2 411.098 91.2145   6
   3  -6   3 2126.63 184.549   5
   3  -6   3 2123.32 179.211   6
   3  -6   4 9900.86 401.632   5
   3  -6   4 10419.0 387.816   6
   3  -6   5 13991.7 476.578   6
   3  -6   6 3584.43 258.686   6
   3  -6   7 4892.14 313.084   6
   3  -6   8 13890.7 538.662   6
   3  -6   9 15303.9 583.503   6
   3  -6  10 5780.40 381.370   6
   3  -6  11-69.6222 119.315   6
   3  -6  12 8640.59 491.426   6
   3  -6  13 12669.1 608.822   6
   3  -6  14 12846.0 632.619   6
   3  -6  15 602.376 186.686   6
   3  -6  16 1739.46 256.074   6
   3  -6  17 6399.60 495.926   6
   3  -6  18 6559.13 526.375   6
   3  -5  -5 2069.51 206.445   5
   3  -5  -4 2034.25 176.168   5
   3  -5  -3 3486.05 216.471   5
   3  -5  -2 4335.60 238.592   5
   3  -5  -1 11417.3 376.679   5
   3  -5  -1 11603.8 266.103   6
   3  -5   0 11001.5 379.040   5
   3  -5   0 11139.4 291.907   6
   3  -5   1 20540.9 519.562   5
   3  -5   1 19960.1 430.124   6
   3  -5   2 16227.3 466.555   5
   3  -5   2 16301.3 417.157   6
   3  -5   3 2188.77 177.786   5
   3  -5   3 2208.01 171.102   6
   3  -5   4 65.9766 72.9302   6
   3  -5   5 7652.18 341.945   6
   3  -5   6 38322.3 791.680   6
   3  -5   7 28214.5 709.370   6
   3  -5   8 6792.98 360.952   6
   3  -5   9 2445.36 235.033   6
   3  -5  10 14006.4 556.436   6
   3  -5  11 14983.4 597.753   6
   3  -5  12 5027.39 364.911   6
   3  -5  13 748.232 176.785   6
   3  -5  14 5272.10 401.495   6
   3  -5  15 11414.3 599.723   6
   3  -5  16 6138.81 466.609   6
   3  -5  17 1009.78 232.077   6
   3  -5  18 872.611 241.307   6
   3  -5  19 3666.38 414.814   6
   3  -4  -5 5985.30 331.309   5
   3  -4  -4 14866.9 417.767   5
   3  -4  -3 6397.08 265.398   5
   3  -4  -2 6630.50 149.774   6
   3  -4  -2 7067.16 286.219   5
   3  -4  -1 18116.3 310.471   6
   3  -4  -1 18108.5 449.949   5
   3  -4   0 97917.9 910.681   6
   3  -4   0 95445.2 1118.27   5
   3  -4   1 11402.2 305.294   6
   3  -4   1 10701.0 345.455   5
   3  -4   2-7.61144 62.1602   6
   3  -4   3 3730.38 210.011   6
   3  -4   4 25939.5 571.538   6
   3  -4   5 19596.1 521.442   6
   3  -4   6 2974.65 214.054   6
   3  -4   7 17420.9 539.108   6
   3  -4   8 29018.8 728.182   6
   3  -4   9 23952.2 688.898   6
   3  -4  10 5563.65 347.027   6
   3  -4  11 51.6304 119.279   6
   3  -4  12 8557.43 460.394   6
   3  -4  13 18882.0 698.507   6
   3  -4  14 8011.13 472.445   6
   3  -4  15 91.5789 120.539   6
   3  -4  16 2660.93 309.899   6
   3  -4  17 4656.77 407.716   6
   3  -4  18 4983.58 446.051   6
   3  -4  19 64.5351 150.087   6
   3  -3  -4 23151.3 482.893   5
   3  -3  -3 29102.1 525.350   5
   3  -3  -2 22000.8 451.685   5
   3  -3  -2 19802.5 240.474   6
   3  -3  -1 1450.21 74.1755   6
   3  -3  -1 1523.92 128.695   5
   3  -3   0 7125.37 201.129   6
   3  -3   0 7014.40 262.401   5
   3  -3   1 88054.2 896.176   6
   3  -3   2 70206.0 847.966   6
   3  -3   3 21162.3 471.886   6
   3  -3   4 5648.09 263.127   6
   3  -3   5 20466.7 517.319   6
   3  -3   6 41060.9 781.197   6
   3  -3   7 40217.7 807.015   6
   3  -3   8 2832.30 227.723   6
   3  -3   9 5153.69 317.318   6
   3  -3  10 18887.1 615.868   6
   3  -3  11 18343.4 630.839   6
   3  -3  12 214.874 105.546   6
   3  -3  13 5291.30 370.345   6
   3  -3  14 14019.9 615.509   6
   3  -3  15 9993.17 536.978   6
   3  -3  16 3684.05 350.223   6
   3  -3  17-76.4301 156.557   6
   3  -3  18 610.624 201.002   6
   3  -3  19 5353.97 458.545   6
   3  -2  -4 5868.43 220.679   5
   3  -2  -3 10.3598 55.1542   5
   3  -2  -2 22782.2 411.701   5
   3  -2  -2 20230.0 256.863   6
   3  -2  -1 85036.6 733.400   6
   3  -2  -1 85914.4 903.579   5
   3  -2   0 75363.5 752.850   6
   3  -2   0 76002.0 854.652   5
   3  -2   1 10048.1 274.271   6
   3  -2   2 11691.0 330.412   6
   3  -2   3 30496.8 577.057   6
   3  -2   4 38339.5 683.203   6
   3  -2   5 8990.88 343.203   6
   3  -2   6 525.452 110.175   6
   3  -2   7 21684.4 575.223   6
   3  -2   8 67490.8 1091.52   6
   3  -2   9 23982.4 657.222   6
   3  -2  10 638.913 130.134   6
   3  -2  11 576.027 130.510   6
   3  -2  12 16639.8 614.998   6
   3  -2  13 18643.8 670.939   6
   3  -2  14 3840.07 321.263   6
   3  -2  15 31.3849 135.506   6
   3  -2  16 4722.23 381.643   6
   3  -2  17 4409.85 382.120   6
   3  -2  18 1405.39 239.398   6
   3  -2  19-96.0874 166.738   6
   3  -2  20 2198.39 332.713   6
   3  -1  -9 5283.77 198.335   6
   3  -1  -8 21006.6 368.679   6
   3  -1  -7 16682.7 292.085   6
   3  -1  -6 12440.8 226.024   6
   3  -1  -5 1330.47 65.0337   6
   3  -1  -4 30487.6 486.094   5
   3  -1  -4 31521.2 315.513   6
   3  -1  -3 27632.4 403.838   5
   3  -1  -3 24763.7 279.279   6
   3  -1  -2 3733.07 148.162   5
   3  -1  -1 5428.26 182.254   5
   3  -1   1 32800.6 506.689   6
   3  -1   2 20323.9 429.827   6
   3  -1   3 6590.02 256.230   6
   3  -1   4 7133.45 281.307   6
   3  -1   5 31217.5 631.567   6
   3  -1   6 31811.1 672.322   6
   3  -1   7 6739.75 328.724   6
   3  -1   8 73.6983 86.1165   6
   3  -1   9 12531.5 475.607   6
   3  -1  10 24543.6 688.908   6
   3  -1  11 4233.01 298.051   6
   3  -1  12 4769.51 334.083   6
   3  -1  13 1925.20 225.363   6
   3  -1  14 6778.15 416.515   6
   3  -1  15 7024.50 443.705   6
   3  -1  16 870.396 188.985   6
   3  -1  17-9.87426 123.662   6
   3  -1  18 3334.87 335.295   6
   3  -1  19 4462.30 405.811   6
   3  -1  20 1506.42 269.029   6
   3   0 -11 5793.68 262.431   6
   3   0 -10 9921.81 318.061   6
   3   0  -9 7145.32 252.931   6
   3   0  -8 269.542 66.6672   6
   3   0  -7 7953.56 229.119   6
   3   0  -6 18247.7 325.811   6
   3   0  -5 27904.6 380.294   6
   3   0  -4 4194.94 135.676   6
   3   0  -3 4591.99 132.539   5
   3   0  -2 39048.5 437.915   5
   3   0   4 17129.9 445.440   6
   3   0   5 17438.8 474.318   6
   3   0   6 249.074 83.3717   6
   3   0   7 8381.61 355.705   6
   3   0   8 12920.6 457.695   6
   3   0   9 5067.88 303.061   6
   3   0  10-22.3339 110.133   6
   3   0  11 12743.5 513.891   6
   3   0  12 5338.66 348.224   6
   3   0  13 11459.5 516.811   6
   3   0  14-11.7282 98.3604   6
   3   0  15 3645.55 318.969   6
   3   0  16 9318.98 517.075   6
   3   0  17 2293.60 271.689   6
   3   0  18-63.0351 140.892   6
   3   0  19 735.563 192.211   6
   3   0  20 2852.96 337.573   6
   3   1 -11 7532.41 315.886   6
   3   1 -10 104.446 70.6642   6
   3   1  -9 9934.03 326.018   6
   3   1  -8 24230.9 481.859   6
   3   1  -7 21919.2 432.586   6
   3   1  -6 124.094 52.8949   6
   3   1  -5 8382.81 235.399   6
   3   1  -4 43501.2 545.858   6
   3   1  -3 34935.6 318.833   5
   3   1  -2 7512.71 145.634   5
   3   1   6 32442.9 693.917   6
   3   1   7 9747.48 391.834   6
   3   1   8 1901.27 181.049   6
   3   1   9 13763.3 492.642   6
   3   1  10 11083.4 458.531   6
   3   1  11 2280.35 232.141   6
   3   1  12 4298.75 313.298   6
   3   1  13 2413.01 250.296   6
   3   1  14 6437.49 398.844   6
   3   1  15 2201.78 256.293   6
   3   1  16-15.5127 111.100   6
   3   1  17 4203.67 366.977   6
   3   1  18 8577.20 524.799   6
   3   1  19 2650.69 311.586   6
   3   1  20 386.026 165.764   6
   3   1  21 1130.65 254.727   6
   3   2 -11 18455.7 532.845   6
   3   2 -10 22723.8 555.288   6
   3   2  -9 7271.86 295.014   6
   3   2  -8 1780.98 146.781   6
   3   2  -7 12604.3 354.723   6
   3   2  -6 4339.58 201.665   6
   3   2  -5 8118.32 264.700   6
   3   2  -4 2435.31 142.912   6
   3   2  -3 3428.15 162.266   6
   3   2   7 11857.7 442.360   6
   3   2   8 9037.09 395.891   6
   3   2   9 111.059 97.8342   6
   3   2  10 8581.44 403.245   6
   3   2  11 16900.1 587.709   6
   3   2  12 7066.82 395.997   6
   3   2  13 756.151 157.838   6
   3   2  14 1297.44 198.182   6
   3   2  15 5419.52 381.620   6
   3   2  16 8931.20 495.784   6
   3   2  17 2143.30 269.604   6
   3   2  18 64.6085 137.065   6
   3   2  19 1610.04 234.893   6
   3   2  20 1476.05 243.861   6
   3   2  21 885.552 216.334   6
   3   3 -10-113.214 90.0919   6
   3   3  -9 4016.09 234.837   6
   3   3  -8 13118.0 409.914   6
   3   3  -7 13108.9 393.811   6
   3   3  -6 8.05816 58.4973   6
   3   3  -5 11677.9 338.002   6
   3   3  -4 23623.8 475.646   6
   3   3  -3 5289.96 213.941   6
   3   3  -2 258.845 30.6370   5
   3   3   9 31673.4 776.425   6
   3   3  10 15384.4 553.616   6
   3   3  11 195.530 90.8006   6
   3   3  12 12932.0 532.500   6
   3   3  13 10401.2 489.766   6
   3   3  14 8088.53 451.492   6
   3   3  15 567.851 160.321   6
   3   3  16 1422.31 208.313   6
   3   3  17 5104.51 391.460   6
   3   3  18 5612.29 423.483   6
   3   3  19 1493.31 233.332   6
   3   3  20-358.352 189.062   6
   3   3  21 324.867 156.726   6
   3   4  -8 518.071 107.835   6
   3   4  -7 10565.6 380.458   6
   3   4  -6 12130.2 390.013   6
   3   4  -5 7351.87 290.750   6
   3   4  -4-8.97228 67.4197   6
   3   4  -3 5348.96 242.736   6
   3   4  -2 10962.9 200.513   5
   3   4  10 13154.9 517.052   6
   3   4  11 24622.1 723.004   6
   3   4  12 15565.9 579.927   6
   3   4  13 746.387 148.863   6
   3   4  14 600.897 137.389   6
   3   4  15 5747.16 395.930   6
   3   4  16 7086.68 439.774   6
   3   4  17 663.002 171.414   6
   3   4  18-79.0941 154.256   6
   3   4  19 1246.93 216.812   6
   3   4  20 3142.60 340.422   6
   3   5  -7 4918.70 276.122   6
   3   5  -6 1367.15 152.647   6
   3   5  -5 19185.7 501.630   6
   3   5  -4 36016.0 691.754   6
   3   5  -3 6274.64 282.754   6
   3   5  -3 5880.52 149.489   5
   3   5  -2 5289.01 167.180   5
   3   5  -1 8565.53 247.620   5
   3   5  11 2277.63 228.177   6
   3   5  12 23338.2 724.940   6
   3   5  13 21535.5 707.609   6
   3   5  14 7674.69 432.323   6
   3   5  15 839.091 178.123   6
   3   5  16 577.462 142.469   6
   3   5  17 5640.29 410.242   6
   3   5  18 3546.37 339.419   6
   3   5  19 478.230 170.389   6
   3   5  20-155.155 149.995   6
   3   6  -5 1397.47 150.396   6
   3   6  -4 3586.56 235.576   6
   3   6  -3 35016.5 715.600   6
   3   6  -3 34036.2 458.249   5
   3   6  -2 45913.8 579.793   5
   3   6  -1 2763.20 157.106   5
   3   6   0 705.436 98.9193   5
   3   6   1 18657.0 517.040   5
   3   6  12 3972.94 301.318   6
   3   6  13 533.621 142.403   6
   3   6  14 1890.94 224.343   6
   3   6  15 7623.18 442.466   6
   3   6  16 3065.37 300.202   6
   3   6  17 410.927 141.370   6
   3   6  18 1266.99 221.911   6
   3   6  19 1324.74 236.787   6
   3   6  20 1206.97 246.065   6
   3   7  -3 72.0829 42.6835   5
   3   7  -2 20634.8 568.211   6
   3   7  -2 20375.1 418.058   5
   3   7  -1 56877.7 787.055   5
   3   7   0 16533.0 440.070   5
   3   7   1 10948.4 382.641   5
   3   7   2 230.633 99.7432   5
   3   7  13 5964.77 379.773   6
   3   7  14 1876.67 234.660   6
   3   7  15 120.415 108.476   6
   3   7  16 643.945 154.361   6
   3   7  17 1815.09 247.923   6
   3   7  18 3086.94 313.662   6
   3   7  19 195.461 131.505   6
   3   8  -3 27706.2 509.069   5
   3   8  -2 19075.0 441.570   5
   3   8  -1 1581.25 143.519   5
   3   8   0 12607.0 403.429   5
   3   8   1 34120.1 719.320   5
   3   8   2 34742.4 762.387   5
   3   8   3 23774.4 671.347   5
   3   8  13 292.177 109.235   6
   3   8  14 2751.02 275.755   6
   3   8  15 3404.93 297.581   6
   3   8  16 907.644 172.838   6
   3   8  17 224.440 124.718   6
   3   8  18 1765.45 255.045   6
   3   8  19 1726.72 253.576   6
   3   9  -3 1.35441 69.6248   5
   3   9  -2 13631.2 405.317   5
   3   9  -1 30196.8 633.913   5
   3   9   0 23017.8 584.596   5
   3   9   1 3433.23 237.634   5
   3   9  14 9.27747 102.152   6
   3   9  15 621.737 148.435   6
   3   9  16 2440.21 265.703   6
   3   9  17 2561.42 271.015   6
   3   9  18 973.365 201.588   6
   3  10  -3 15519.2 438.815   5
   3  10  -2 1938.53 169.547   5
   3  10  -1 3715.41 237.749   5
   3  10  14 2958.70 274.151   6
   3  10  15 1435.18 199.098   6
   3  10  16-209.799 148.601   6
   3  10  17 727.731 171.660   6
   3  11  15 792.737 169.429   6
   3  11  16 2989.97 298.270   6
   3  11  17 724.360 149.016   6
   3  12  15 33.8256 136.997   6
   3  12  16-448.460 149.735   6
   3  13  15 826.587 161.680   6
   4 -16  -3 2701.72 428.844   5
   4 -16  -2 2533.16 376.911   5
   4 -16  -1 765.292 232.779   5
   4 -16   0 15.3750 153.141   5
   4 -16   1 320.703 169.494   5
   4 -16   2 1496.67 274.113   5
   4 -16   3 1380.08 261.850   5
   4 -16   4-179.601 196.361   5
   4 -16   5 208.767 147.181   5
   4 -16   6 2707.65 346.529   5
   4 -15  -4 873.276 296.654   5
   4 -15  -3 1040.29 257.291   5
   4 -15  -2 174.736 182.731   5
   4 -15  -1 2369.83 329.299   5
   4 -15   0 1258.98 241.066   5
   4 -15   1 894.143 229.917   5
   4 -15   2-23.5085 141.925   5
   4 -15   3 572.276 195.105   5
   4 -15   4 1725.91 261.255   5
   4 -15   5 1067.00 224.045   5
   4 -15   6 604.649 237.219   5
   4 -15   7 190.288 148.478   6
   4 -15   7 273.929 184.932   5
   4 -15   8 1360.46 278.454   5
   4 -15   8 762.353 190.653   6
   4 -15   9 2057.09 308.760   6
   4 -15   9 2423.02 351.202   5
   4 -14  -4 1142.96 289.306   5
   4 -14  -3 1637.81 272.261   5
   4 -14  -2 1860.32 292.762   5
   4 -14  -1 580.449 167.405   5
   4 -14   0 204.928 128.483   5
   4 -14   1 1726.19 255.814   5
   4 -14   2 3063.48 326.248   5
   4 -14   3 1635.38 254.068   5
   4 -14   4-149.993 161.007   5
   4 -14   5 2223.64 268.211   6
   4 -14   5 2336.13 309.152   5
   4 -14   6 3332.27 365.819   5
   4 -14   6 3448.99 336.882   6
   4 -14   7 899.644 209.386   6
   4 -14   7 406.836 189.901   5
   4 -14   8 573.652 193.512   5
   4 -14   8 476.763 187.102   6
   4 -14   9 1539.43 276.556   5
   4 -14   9 1399.80 253.740   6
   4 -14  10 3667.32 402.337   6
   4 -14  10 3148.97 389.511   5
   4 -14  11 2326.07 349.348   5
   4 -14  11 2581.15 353.135   6
   4 -13  -4 1220.03 257.847   5
   4 -13  -3 98.2464 150.669   5
   4 -13  -2 706.771 184.334   5
   4 -13  -1 1735.92 253.658   5
   4 -13   0 2255.82 276.753   5
   4 -13   1-48.0828 141.027   5
   4 -13   2 823.344 174.061   5
   4 -13   3 3039.14 325.520   5
   4 -13   4 3810.57 368.852   5
   4 -13   4 3105.08 290.082   6
   4 -13   5 880.235 188.902   6
   4 -13   5 1005.26 212.040   5
   4 -13   6 430.809 159.530   6
   4 -13   6 461.400 164.943   5
   4 -13   7 6306.60 449.265   6
   4 -13   7 6613.35 478.092   5
   4 -13   8 3392.89 363.224   6
   4 -13   8 3129.05 351.631   5
   4 -13   9 1416.05 253.924   5
   4 -13   9 1491.48 251.404   6
   4 -13  10 187.365 174.177   6
   4 -13  10-7.47532 162.346   5
   4 -13  11 2333.86 324.588   5
   4 -13  11 2274.66 320.995   6
   4 -13  12 3696.05 415.027   6
   4 -13  12 3401.26 388.080   5
   4 -13  13 1871.58 314.541   5
   4 -12  -5 90.0239 144.886   5
   4 -12  -4 1584.64 242.598   5
   4 -12  -3 4005.30 358.873   5
   4 -12  -2 1742.24 238.307   5
   4 -12  -1 52.5534 113.579   5
   4 -12   0 1441.66 218.239   5
   4 -12   1 5593.18 398.417   5
   4 -12   2 2653.74 293.002   5
   4 -12   3 113.977 92.3776   6
   4 -12   3 36.7265 121.537   5
   4 -12   4 1424.11 202.140   6
   4 -12   4 1003.92 213.130   5
   4 -12   5 5755.23 388.343   6
   4 -12   5 5207.37 399.658   5
   4 -12   6 4843.29 371.676   6
   4 -12   6 4734.18 387.905   5
   4 -12   7 1500.27 238.688   5
   4 -12   7 1441.93 234.441   6
   4 -12   8 2149.43 291.816   5
   4 -12   8 1877.68 270.551   6
   4 -12   9 3607.54 366.338   6
   4 -12   9 3852.32 378.925   5
   4 -12  10 7353.51 522.140   6
   4 -12  10 6841.81 503.357   5
   4 -12  11 2522.05 324.309   5
   4 -12  11 2998.16 354.821   6
   4 -12  12-165.052 184.380   5
   4 -12  12-161.258 178.161   6
   4 -12  13 2033.57 309.673   5
   4 -12  13 2569.82 361.696   6
   4 -12  14 3630.19 400.517   5
   4 -11  -5 2378.71 311.083   5
   4 -11  -4 439.197 174.248   5
   4 -11  -3 250.767 134.849   5
   4 -11  -2 2841.54 280.186   5
   4 -11  -1 3744.86 313.597   5
   4 -11   0 1287.16 187.593   5
   4 -11   1 231.154 141.939   5
   4 -11   2 5358.85 323.826   6
   4 -11   2 5721.08 400.280   5
   4 -11   3 7555.78 447.541   5
   4 -11   3 7544.76 391.400   6
   4 -11   4 5100.93 344.342   6
   4 -11   4 4616.85 353.233   5
   4 -11   5 121.511 129.204   5
   4 -11   5 46.6485 99.2718   6
   4 -11   6 4066.55 329.975   6
   4 -11   6 4398.87 372.166   5
   4 -11   7 9819.08 521.995   6
   4 -11   7 10276.1 556.210   5
   4 -11   8 11031.1 574.710   6
   4 -11   8 10726.4 575.626   5
   4 -11   9-101.465 130.196   5
   4 -11   9 44.9331 135.229   6
   4 -11  10 1174.02 212.228   5
   4 -11  10 1421.31 253.765   6
   4 -11  11 5463.35 439.051   6
   4 -11  11 5510.43 447.524   5
   4 -11  12 8450.77 561.405   6
   4 -11  12 7990.50 542.322   5
   4 -11  13 1831.21 622.592   6
   4 -11  13 1264.14 235.234   5
   4 -11  14-97.0244 176.938   6
   4 -11  14-218.657 217.142   5
   4 -11  15 2002.29 301.094   5
   4 -10  -5 988.969 208.537   5
   4 -10  -4 7352.40 438.160   5
   4 -10  -3 3822.58 312.098   5
   4 -10  -2 639.168 150.107   5
   4 -10  -1 2142.17 237.058   5
   4 -10   0 10379.1 499.628   5
   4 -10   1 12019.5 544.770   5
   4 -10   1 11280.5 423.907   6
   4 -10   2 2098.10 198.956   6
   4 -10   2 1934.27 223.451   5
   4 -10   3 422.503 131.189   5
   4 -10   3 642.305 132.049   6
   4 -10   4 8414.03 419.053   6
   4 -10   4 9026.35 485.407   5
   4 -10   5 12177.0 519.112   6
   4 -10   5 13143.8 581.329   5
   4 -10   6 3967.12 320.078   6
   4 -10   6 3926.70 329.744   5
   4 -10   7 14.6285 143.133   5
   4 -10   7 73.1684 106.215   6
   4 -10   8 1181.29 189.896   5
   4 -10   8 1774.76 251.033   6
   4 -10   9 9950.29 544.876   6
   4 -10   9 9017.26 515.964   5
   4 -10  10 8043.28 512.556   6
   4 -10  10 8420.00 523.107   5
   4 -10  11 1678.72 251.485   6
   4 -10  11 1291.23 220.705   5
   4 -10  12 330.713 161.345   6
   4 -10  12-203.907 189.578   5
   4 -10  13 6613.32 510.340   6
   4 -10  13 6537.50 495.339   5
   4 -10  14 5768.59 482.828   6
   4 -10  14 5387.11 467.420   5
   4 -10  15 711.782 171.001   5
   4 -10  15 1408.18 268.360   6
   4 -10  16-363.963 197.707   5
   4  -9  -5 344.376 134.272   5
   4  -9  -4 317.426 134.785   5
   4  -9  -3 4077.87 310.100   5
   4  -9  -2 8595.29 438.807   5
   4  -9  -1 6042.53 361.279   5
   4  -9   0 429.404 90.1313   6
   4  -9   0 555.801 151.374   5
   4  -9   1 2174.55 227.666   5
   4  -9   1 2095.33 179.829   6
   4  -9   2 11087.9 425.916   6
   4  -9   2 10886.5 491.057   5
   4  -9   3 12676.0 470.584   6
   4  -9   3 12667.6 537.664   5
   4  -9   4 5982.30 335.334   6
   4  -9   4 5967.26 378.424   5
   4  -9   5 81.7856 106.388   5
   4  -9   5 15.7843 100.598   6
   4  -9   6 4248.68 319.322   6
   4  -9   6 3583.76 298.572   5
   4  -9   7 8139.35 452.643   5
   4  -9   7 8371.91 455.330   6
   4  -9   8 6635.15 431.755   5
   4  -9   8 6905.41 427.922   6
   4  -9   9 1279.84 211.536   6
   4  -9   9 914.413 179.408   5
   4  -9  10 1469.75 219.522   6
   4  -9  10 851.746 160.740   5
   4  -9  11 5730.01 435.558   5
   4  -9  11 6402.52 457.976   6
   4  -9  12 4791.18 416.109   6
   4  -9  13 2907.69 342.119   6
   4  -9  14-173.694 138.354   6
   4  -9  15 2047.37 320.569   6
   4  -9  16 3815.26 425.488   6
   4  -8  -5 12422.7 530.889   5
   4  -8  -4 10649.1 474.552   5
   4  -8  -3 2877.42 249.282   5
   4  -8  -2 121.127 93.0465   5
   4  -8  -1 6565.98 366.717   5
   4  -8   0 10019.4 446.520   5
   4  -8   0 9751.44 335.699   6
   4  -8   1 4126.52 236.119   6
   4  -8   1 4179.59 293.414   5
   4  -8   2 1458.21 150.808   6
   4  -8   2 1688.33 207.219   5
   4  -8   3 1613.32 173.964   6
   4  -8   3 1615.69 192.887   5
   4  -8   4 10571.4 472.369   5
   4  -8   4 11168.6 450.841   6
   4  -8   5 17955.5 622.069   5
   4  -8   5 18993.9 609.952   6
   4  -8   6 3465.68 294.455   5
   4  -8   6 3765.39 292.418   6
   4  -8   7 323.371 124.672   6
   4  -8   7 356.288 108.469   5
   4  -8   8 10002.0 510.837   5
   4  -8   8 10132.5 500.146   6
   4  -8   9 11041.8 540.630   6
   4  -8  10 8096.34 484.012   6
   4  -8  11 1250.61 214.885   6
   4  -8  12 1947.55 272.425   6
   4  -8  13 5667.17 449.194   6
   4  -8  14 7595.37 526.946   6
   4  -8  15 1123.10 242.740   6
   4  -8  16 821.269 235.929   6
   4  -7  -5 1229.34 174.935   5
   4  -7  -4 267.993 96.5834   5
   4  -7  -3 4499.62 290.253   5
   4  -7  -2 8912.79 395.707   5
   4  -7  -1 7149.61 358.724   5
   4  -7  -1 7064.45 246.159   6
   4  -7   0 150.031 66.1641   6
   4  -7   0 101.553 91.0053   5
   4  -7   1 5341.29 250.004   6
   4  -7   1 5628.45 320.739   5
   4  -7   2 13049.2 491.447   5
   4  -7   2 12433.9 407.536   6
   4  -7   3 12573.3 489.764   5
   4  -7   3 12580.1 433.135   6
   4  -7   4 1742.86 183.708   6
   4  -7   4 1720.26 192.363   5
   4  -7   5 275.439 105.472   6
   4  -7   5 252.191 87.5695   5
   4  -7   6 12124.0 510.078   5
   4  -7   6 12084.8 490.904   6
   4  -7   7 6645.49 385.245   6
   4  -7   8 2695.54 267.849   6
   4  -7   9 629.908 155.645   6
   4  -7  10 4795.49 369.480   6
   4  -7  11 6106.81 426.057   6
   4  -7  12 4007.43 365.588   6
   4  -7  13 98.2537 137.526   6
   4  -7  14 2180.63 299.746   6
   4  -7  15 4699.01 424.102   6
   4  -7  16 2352.02 321.496   6
   4  -7  17 287.608 175.499   6
   4  -6  -5 8623.33 388.344   5
   4  -6  -4 6229.08 322.773   5
   4  -6  -3 2545.80 206.635   5
   4  -6  -2 407.410 116.752   5
   4  -6  -1 7445.12 344.974   5
   4  -6  -1 7712.37 239.272   6
   4  -6   0 13518.3 352.681   6
   4  -6   0 13865.8 471.719   5
   4  -6   1 7215.23 348.295   5
   4  -6   1 7336.95 280.182   6
   4  -6   2 7.94756 89.9532   5
   4  -6   2 45.1350 76.3013   6
   4  -6   3 6877.51 342.463   5
   4  -6   3 7009.19 318.800   6
   4  -6   4 13394.8 496.837   5
   4  -6   4 13864.8 466.166   6
   4  -6   5 11505.4 443.627   6
   4  -6   6 3019.05 241.995   6
   4  -6   7 4682.88 313.515   6
   4  -6   8 11032.7 494.617   6
   4  -6   9 8912.38 461.405   6
   4  -6  10 940.442 181.660   6
   4  -6  11 465.112 144.790   6
   4  -6  12 3155.88 319.546   6
   4  -6  13 4099.55 366.902   6
   4  -6  14 1978.03 273.994   6
   4  -6  15-81.4982 136.095   6
   4  -6  16 1034.77 229.961   6
   4  -6  17 2974.60 349.195   6
   4  -6  18 1949.62 314.829   6
   4  -5  -5 2359.64 192.423   5
   4  -5  -4 419.041 98.0588   5
   4  -5  -3 6208.74 296.033   5
   4  -5  -2 16944.2 498.866   5
   4  -5  -2 15594.1 275.084   6
   4  -5  -1 10435.5 262.704   6
   4  -5  -1 9986.53 374.237   5
   4  -5   0 2171.45 138.857   6
   4  -5   0 1993.70 178.700   5
   4  -5   1 12342.3 354.259   6
   4  -5   1 12546.5 430.567   5
   4  -5   2 5829.16 304.569   5
   4  -5   2 5743.73 259.829   6
   4  -5   3 1234.89 148.052   5
   4  -5   3 1329.24 140.966   6
   4  -5   4 193.815 89.6705   6
   4  -5   5 2982.38 223.354   6
   4  -5   6 10039.9 425.155   6
   4  -5   7 16710.6 570.780   6
   4  -5   8-10.9476 104.126   6
   4  -5   9 3791.06 301.112   6
   4  -5  10 6908.23 407.037   6
   4  -5  11 1719.04 231.571   6
   4  -5  12 124.952 112.038   6
   4  -5  13 7175.72 460.995   6
   4  -5  14 10781.6 582.679   6
   4  -5  15 8568.95 535.805   6
   4  -5  16 916.131 224.989   6
   4  -5  17 230.942 171.158   6
   4  -5  18 2029.49 312.008   6
   4  -4  -5 16664.3 472.872   5
   4  -4  -4 8784.75 328.778   5
   4  -4  -3 352.684 87.6447   5
   4  -4  -2 2086.66 169.942   5
   4  -4  -2 1898.83 88.0907   6
   4  -4  -1 2511.89 122.789   6
   4  -4  -1 2645.69 187.596   5
   4  -4   0 69012.2 788.395   6
   4  -4   0 71121.6 1002.93   5
   4  -4   1 40993.4 641.885   6
   4  -4   1 41205.0 760.328   5
   4  -4   2 8074.31 303.626   6
   4  -4   3 8585.53 331.059   6
   4  -4   4 21345.4 549.479   6
   4  -4   5 5997.05 307.098   6
   4  -4   6 3021.55 234.003   6
   4  -4   7 7822.28 387.910   6
   4  -4   8 18141.5 603.634   6
   4  -4   9 5278.07 343.633   6
   4  -4  10-87.6600 135.505   6
   4  -4  11 883.177 174.246   6
   4  -4  12 7733.22 450.904   6
   4  -4  13 6726.40 433.140   6
   4  -4  14 1330.52 216.111   6
   4  -4  15 576.081 155.285   6
   4  -4  16 5866.45 448.419   6
   4  -4  17 6379.07 483.196   6
   4  -4  18 2955.92 358.302   6
   4  -3  -5 1558.62 139.710   5
   4  -3  -4 1711.72 141.635   5
   4  -3  -3 6704.68 264.058   5
   4  -3  -2 5275.15 236.885   5
   4  -3  -2 5324.58 144.800   6
   4  -3  -1 1714.84 98.3166   6
   4  -3  -1 1777.00 142.744   5
   4  -3   0 3603.69 161.830   6
   4  -3   0 3474.97 198.995   5
   4  -3   1 75430.7 890.103   6
   4  -3   2 7773.87 292.628   6
   4  -3   3 2432.42 176.893   6
   4  -3   4 14590.4 440.664   6
   4  -3   5 14251.1 459.104   6
   4  -3   6 16706.2 521.080   6
   4  -3   7 7467.16 367.945   6
   4  -3   8 1765.27 198.054   6
   4  -3   9 19093.4 626.211   6
   4  -3  10 30735.0 824.513   6
   4  -3  11 7305.70 424.920   6
   4  -3  12 133.579 122.444   6
   4  -3  13 6959.33 437.250   6
   4  -3  14 17168.5 703.869   6
   4  -3  15 11480.9 597.669   6
   4  -3  16 880.084 199.064   6
   4  -3  17 809.340 214.316   6
   4  -3  18 1988.15 292.677   6
   4  -3  19 5817.73 479.043   6
   4  -2  -5 14024.8 430.783   5
   4  -2  -4 2572.34 148.821   5
   4  -2  -3 1108.25 111.004   5
   4  -2  -3 935.396 56.6043   6
   4  -2  -2 3815.10 135.419   6
   4  -2  -2 4084.21 194.549   5
   4  -2  -1 10285.4 253.740   6
   4  -2  -1 10111.5 308.776   5
   4  -2   0 474.259 82.2933   6
   4  -2   0 277.223 60.3138   5
   4  -2   1 8839.34 281.721   6
   4  -2   2 7967.18 290.092   6
   4  -2   3 36059.2 668.844   6
   4  -2   4 11651.8 397.105   6
   4  -2   5 538.704 109.464   6
   4  -2   6 11442.7 433.263   6
   4  -2   7 27208.2 697.891   6
   4  -2   8 21173.1 634.165   6
   4  -2   9 2220.21 223.315   6
   4  -2  10 321.069 117.190   6
   4  -2  11 7930.74 435.063   6
   4  -2  12 16212.6 632.591   6
   4  -2  13 15705.0 642.022   6
   4  -2  14 3571.07 333.421   6
   4  -2  15 540.339 136.055   6
   4  -2  16 8262.20 514.332   6
   4  -2  17 7848.19 518.707   6
   4  -2  18 955.239 223.487   6
   4  -2  19-70.3896 170.336   6
   4  -1  -8 4258.12 140.020   6
   4  -1  -7 1648.65 79.9190   6
   4  -1  -6 1294.32 66.5891   6
   4  -1  -5 5376.54 126.227   6
   4  -1  -4 23241.4 300.161   6
   4  -1  -4 25637.3 426.533   5
   4  -1  -3 15712.1 335.788   5
   4  -1  -2 1058.87 88.6223   5
   4  -1  -1 3547.84 164.598   5
   4  -1   1 23490.9 482.352   6
   4  -1   2 14137.4 391.349   6
   4  -1   3 28.5109 67.2522   6
   4  -1   4 28532.8 622.242   6
   4  -1   5 30218.2 667.952   6
   4  -1   6 31803.6 721.367   6
   4  -1   7 13388.5 483.866   6
   4  -1   8 1866.75 196.517   6
   4  -1   9 23973.4 705.018   6
   4  -1  10 27696.4 782.579   6
   4  -1  11 4528.15 332.313   6
   4  -1  12 1253.93 194.344   6
   4  -1  13 4021.33 328.178   6
   4  -1  14 11961.3 577.058   6
   4  -1  15 10449.0 552.566   6
   4  -1  16 1104.50 217.743   6
   4  -1  17 1999.19 274.440   6
   4  -1  18 7195.53 507.336   6
   4  -1  19 3888.54 392.297   6
   4   0 -10 8304.01 269.967   6
   4   0  -9 1101.39 98.5382   6
   4   0  -8 218.177 53.5473   6
   4   0  -7 7259.81 210.294   6
   4   0  -6 5222.51 169.502   6
   4   0  -5 8720.44 215.648   6
   4   0  -4 527.447 63.8132   6
   4   0  -4 590.056 68.8245   5
   4   0  -3 10288.2 234.126   5
   4   0  -2 19103.2 344.227   5
   4   0   4 13462.8 437.870   6
   4   0   5 701.865 124.800   6
   4   0   6 10512.0 418.494   6
   4   0   7 13797.3 493.742   6
   4   0   8 18026.1 586.594   6
   4   0   9 3619.05 276.041   6
   4   0  10 3000.16 267.233   6
   4   0  11 20621.3 698.452   6
   4   0  12 8438.79 460.530   6
   4   0  13 8853.37 483.253   6
   4   0  14-42.9543 122.127   6
   4   0  15 5958.80 417.834   6
   4   0  16 7979.09 496.287   6
   4   0  17 2751.32 320.028   6
   4   0  18-313.206 195.050   6
   4   0  19 1919.30 287.179   6
   4   0  20 3046.18 359.625   6
   4   1 -10 4644.11 232.311   6
   4   1  -9 19548.4 443.064   6
   4   1  -8 11785.8 324.693   6
   4   1  -7 3651.71 175.909   6
   4   1  -6 4841.75 194.036   6
   4   1  -5 20480.4 381.735   6
   4   1  -4 40956.9 555.695   6
   4   1  -3 27482.2 334.075   5
   4   1  -2 3302.16 122.463   5
   4   1   6 20679.5 604.414   6
   4   1   7 4718.93 308.896   6
   4   1   8 9290.18 426.632   6
   4   1   9 28885.6 772.811   6
   4   1  10 19008.1 649.557   6
   4   1  11 1785.53 214.639   6
   4   1  12 6979.83 423.704   6
   4   1  13 2150.53 258.311   6
   4   1  14 8311.75 487.187   6
   4   1  15 2421.52 280.112   6
   4   1  16 127.180 120.063   6
   4   1  17 2880.65 314.022   6
   4   1  18 4607.85 398.775   6
   4   1  19 1380.12 238.511   6
   4   1  20-250.979 202.705   6
   4   2 -10 1901.01 163.077   6
   4   2  -9-80.0437 89.5834   6
   4   2  -8 1354.81 126.575   6
   4   2  -7 8300.96 294.134   6
   4   2  -6 14973.9 380.723   6
   4   2  -5 5602.33 224.968   6
   4   2  -4 3871.90 185.570   6
   4   2   8 10153.1 459.968   6
   4   2   9-44.7815 98.0793   6
   4   2  10 6414.45 382.535   6
   4   2  11 10708.1 504.515   6
   4   2  12 7980.80 453.673   6
   4   2  13-0.09719 111.052   6
   4   2  14 495.711 148.671   6
   4   2  15 4119.54 361.031   6
   4   2  16 3841.79 356.394   6
   4   2  17 6.78709 130.600   6
   4   2  18 697.414 182.316   6
   4   2  19 1652.86 267.355   6
   4   2  20 1429.65 266.269   6
   4   3 -10 4227.68 257.725   6
   4   3  -9 12851.8 423.560   6
   4   3  -8 16709.5 467.011   6
   4   3  -7 3352.24 208.671   6
   4   3  -6 2308.77 170.807   6
   4   3  -5 14024.8 387.987   6
   4   3  -4 19083.2 447.605   6
   4   3   9 14696.8 578.519   6
   4   3  10 2480.03 251.890   6
   4   3  11 349.918 122.414   6
   4   3  12 5014.65 361.622   6
   4   3  13 14501.5 617.658   6
   4   3  14 4339.95 356.049   6
   4   3  15-174.997 150.045   6
   4   3  16 2232.44 281.576   6
   4   3  17 5762.59 438.555   6
   4   3  18 2244.55 287.334   6
   4   3  19 225.514 144.437   6
   4   3  20 573.299 191.391   6
   4   4  -8 98.4833 82.2980   6
   4   4  -7 14538.1 447.744   6
   4   4  -6 29986.8 630.397   6
   4   4  -5 17335.5 468.932   6
   4   4  -4 333.345 84.3087   6
   4   4  -2 48265.4 538.845   5
   4   4  10 18042.1 657.885   6
   4   4  11 18502.3 678.105   6
   4   4  12 2756.00 287.757   6
   4   4  13 1109.43 192.611   6
   4   4  14 6170.69 421.167   6
   4   4  15 6453.12 446.545   6
   4   4  16 1865.15 274.072   6
   4   4  17 224.818 145.835   6
   4   4  18 2080.61 288.899   6
   4   4  19 3313.07 352.743   6
   4   4  20 2305.75 306.594   6
   4   5  -6 344.300 90.4694   6
   4   5  -5 10696.1 391.108   6
   4   5  -4 13905.4 436.762   6
   4   5  -3 4525.46 245.787   6
   4   5  -3 3480.08 99.0813   5
   4   5  -2 789.593 68.4672   5
   4   5  11 3716.92 322.411   6
   4   5  12 8502.21 476.193   6
   4   5  13 8666.76 483.611   6
   4   5  14 2999.56 294.088   6
   4   5  15-104.332 127.465   6
   4   5  16 4167.22 371.292   6
   4   5  17 6747.81 481.715   6
   4   5  18 2612.58 317.883   6
   4   5  19-23.5898 145.856   6
   4   5  20 664.166 171.327   6
   4   6  -3 19516.9 546.941   6
   4   6  -3 18824.3 296.836   5
   4   6  -2 8942.09 234.950   5
   4   6  -1 55.7981 53.8672   5
   4   6  12 3405.73 306.666   6
   4   6  13 985.605 162.003   6
   4   6  14 5569.78 402.635   6
   4   6  15 7520.62 472.740   6
   4   6  16 1640.54 233.593   6
   4   6  17-232.835 161.646   6
   4   6  18 2157.54 284.731   6
   4   6  19 2862.57 332.553   6
   4   6  20 831.620 209.588   6
   4   7  -3 114.243 43.0859   5
   4   7  -2 18551.2 384.030   5
   4   7  -1 35465.5 608.412   5
   4   7   0 11801.6 383.184   5
   4   7   1 925.756 141.404   5
   4   7  13 7223.23 452.139   6
   4   7  14 79.4644 115.021   6
   4   7  15 321.618 128.613   6
   4   7  16 4635.49 375.252   6
   4   7  17 5218.28 409.758   6
   4   7  18 3573.04 368.598   6
   4   7  19 289.340 148.538   6
   4   7  20 374.370 198.955   6
   4   8  -3 10571.3 287.972   5
   4   8  -2 1161.20 113.059   5
   4   8  -1 3227.29 191.647   5
   4   8   0 23765.5 569.898   5
   4   8   1 32512.4 721.461   5
   4   8   2 27386.3 733.866   5
   4   8  14 5927.35 411.168   6
   4   8  15 4860.59 389.831   6
   4   8  16 458.208 156.308   6
   4   8  17 267.964 128.187   6
   4   8  18 2591.67 298.298   6
   4   8  19 2122.85 292.389   6
   4   9  -3 855.089 97.8301   5
   4   9  -2 16050.9 421.488   5
   4   9  -1 18528.8 501.459   5
   4   9   0 1048.54 137.258   5
   4   9   1 10934.5 429.191   5
   4   9  14-174.646 140.028   6
   4   9  15 948.409 174.645   6
   4   9  16 2477.10 285.156   6
   4   9  17 1661.02 230.290   6
   4   9  18 79.5562 132.299   6
   4   9  19-48.9228 148.667   6
   4  10  -3 10893.2 351.828   5
   4  10  -2 1872.60 161.027   5
   4  10  -1 1064.82 132.915   5
   4  10   0 12316.1 454.286   5
   4  10  15 948.840 180.042   6
   4  10  16-315.686 198.540   6
   4  10  17 519.691 161.479   6
   4  10  18 789.347 179.319   6
   4  11  -3 4221.15 234.872   5
   4  11  -2 33319.9 712.368   5
   4  11  15 1803.86 242.037   6
   4  11  16 1017.28 201.589   6
   4  11  17 195.838 125.903   6
   4  12  15-213.040 169.411   6
   4  12  16-171.869 160.020   6
   4  12  17 1535.49 231.360   6
   4  13  16 158.134 116.806   6
   5 -15  -4 544.459 258.065   5
   5 -15  -3-184.783 229.194   5
   5 -15  -2 1214.07 237.235   5
   5 -15  -1 1869.45 306.863   5
   5 -15   0 1382.37 265.675   5
   5 -15   1 112.694 146.871   5
   5 -15   2 397.645 183.067   5
   5 -15   3 2234.12 314.920   5
   5 -15   4 2190.32 299.489   5
   5 -15   5 370.967 160.110   5
   5 -15   6-9.61961 162.970   6
   5 -15   6 115.752 174.443   5
   5 -15   7 2723.43 330.365   6
   5 -15   8 1354.73 269.718   6
   5 -15   9 1582.93 305.599   6
   5 -14  -4 1396.82 296.676   5
   5 -14  -3 1721.80 289.129   5
   5 -14  -2 743.914 217.470   5
   5 -14  -1-61.5048 148.284   5
   5 -14   0 2721.62 326.893   5
   5 -14   1 3908.48 379.203   5
   5 -14   2 2286.72 302.188   5
   5 -14   3 452.059 182.632   5
   5 -14   4 512.074 208.494   5
   5 -14   5 2049.71 276.235   6
   5 -14   5 2606.82 346.148   5
   5 -14   6 2534.45 303.561   6
   5 -14   6 2453.65 323.410   5
   5 -14   7 1629.36 273.080   6
   5 -14   7 1504.26 291.340   5
   5 -14   8 942.294 229.250   5
   5 -14   8 725.086 206.876   6
   5 -14   9 1384.26 288.310   5
   5 -14   9 1033.76 232.665   6
   5 -14  10 2324.88 322.182   6
   5 -13  -5 1645.54 352.979   5
   5 -13  -4 756.415 206.174   5
   5 -13  -3-300.548 180.529   5
   5 -13  -2 921.180 203.728   5
   5 -13  -1 2164.89 286.715   5
   5 -13   0 754.241 173.019   5
   5 -13   1 271.567 140.834   5
   5 -13   2 1514.10 247.522   5
   5 -13   3 3530.67 367.229   5
   5 -13   4 2356.11 255.842   6
   5 -13   4 2711.56 328.873   5
   5 -13   5 150.224 112.082   6
   5 -13   5 231.557 173.763   5
   5 -13   6 416.699 166.569   6
   5 -13   6 483.473 189.331   5
   5 -13   7 2620.05 335.307   5
   5 -13   7 2094.98 288.754   6
   5 -13   8 3185.27 354.529   6
   5 -13   8 3795.86 396.664   5
   5 -13   9 84.5067 168.984   5
   5 -13   9 171.770 164.726   6
   5 -13  10 327.697 197.346   5
   5 -13  10 229.614 166.275   6
   5 -13  11 1064.82 266.701   5
   5 -13  11 1166.81 250.287   6
   5 -12  -5 82.0795 159.547   5
   5 -12  -4 2303.14 298.240   5
   5 -12  -3 3363.04 343.482   5
   5 -12  -2 2341.98 294.173   5
   5 -12  -1 196.584 137.860   5
   5 -12   0 1245.79 225.990   5
   5 -12   1 5458.13 406.437   5
   5 -12   2 2401.91 231.874   6
   5 -12   2 2708.63 310.408   5
   5 -12   3-41.0116 100.324   6
   5 -12   3 187.597 141.091   5
   5 -12   4 1186.50 192.408   6
   5 -12   4 1269.93 241.092   5
   5 -12   5 3144.12 305.453   6
   5 -12   5 3128.29 324.421   5
   5 -12   6 2535.10 314.089   5
   5 -12   6 2372.26 281.209   6
   5 -12   7 139.294 122.806   6
   5 -12   7 176.746 138.508   5
   5 -12   8 580.549 208.815   5
   5 -12   8 661.855 182.447   6
   5 -12   9 3008.87 340.492   6
   5 -12   9 2512.50 319.311   5
   5 -12  10 2038.48 290.935   5
   5 -12  10 2478.43 325.389   6
   5 -12  11 339.217 147.045   5
   5 -12  11 388.011 155.049   6
   5 -12  12-172.686 171.209   5
   5 -12  12-11.1750 172.567   6
   5 -11  -5 1131.44 231.166   5
   5 -11  -4 83.8390 119.197   5
   5 -11  -3 358.750 132.845   5
   5 -11  -2 3692.70 327.006   5
   5 -11  -1 4186.21 352.373   5
   5 -11   0 644.669 164.570   5
   5 -11   1 73.0597 83.7402   6
   5 -11   1 166.962 147.905   5
   5 -11   2 4317.26 364.636   5
   5 -11   2 4141.56 291.049   6
   5 -11   3 2339.22 232.005   6
   5 -11   3 2379.21 267.546   5
   5 -11   4 764.900 168.599   5
   5 -11   4 1081.29 186.210   6
   5 -11   5 24.5385 127.944   5
   5 -11   5-102.045 118.630   6
   5 -11   6 1182.13 228.493   5
   5 -11   6 873.304 178.157   6
   5 -11   7 1756.95 252.257   5
   5 -11   7 1734.14 241.826   6
   5 -11   8 1093.67 220.585   5
   5 -11   8 760.213 177.375   6
   5 -11   9-58.1350 166.545   5
   5 -11   9-158.521 149.750   6
   5 -11  10 705.264 187.222   5
   5 -11  10 807.501 192.294   6
   5 -11  11 3182.37 353.066   5
   5 -11  11 3594.57 378.157   6
   5 -11  12 2655.15 344.913   6
   5 -11  12 2197.14 306.414   5
   5 -11  13-85.5374 203.113   6
   5 -11  13 86.5555 176.623   5
   5 -11  14 1142.10 258.902   5
   5 -10  -5 1595.32 245.225   5
   5 -10  -4 3166.10 308.320   5
   5 -10  -3 2084.90 250.718   5
   5 -10  -2-54.5527 130.350   5
   5 -10  -1 397.790 126.079   5
   5 -10   0 2930.87 287.267   5
   5 -10   1 1805.52 181.723   6
   5 -10   1 2233.38 253.833   5
   5 -10   2 889.972 146.664   6
   5 -10   2 741.533 169.389   5
   5 -10   3 574.117 170.214   5
   5 -10   3 638.977 135.209   6
   5 -10   4 2732.36 255.585   6
   5 -10   4 2734.96 289.271   5
   5 -10   5 4449.11 322.542   6
   5 -10   5 4656.22 372.208   5
   5 -10   6 1211.55 209.522   5
   5 -10   6 1302.67 200.721   6
   5 -10   7-93.7771 148.917   5
   5 -10   7-21.7701 127.367   6
   5 -10   8 3698.02 337.485   6
   5 -10   8 3310.07 327.376   5
   5 -10   9 6053.96 443.395   5
   5 -10   9 6352.62 459.849   6
   5 -10  10 2707.24 303.808   5
   5 -10  10 2782.26 333.797   6
   5 -10  11 79.9622 137.803   6
   5 -10  11 70.2583 180.491   5
   5 -10  12 1055.61 224.602   6
   5 -10  12 647.219 211.782   5
   5 -10  13 3427.80 386.303   5
   5 -10  13 3462.81 381.708   6
   5 -10  14 2982.08 375.103   6
   5 -10  14 2433.77 333.357   5
   5 -10  15 328.900 171.996   5
   5  -9  -6 2241.82 318.142   5
   5  -9  -5 606.617 158.729   5
   5  -9  -4 31.2290 107.184   5
   5  -9  -3 1203.64 185.758   5
   5  -9  -2 3315.25 280.787   5
   5  -9  -1 1287.57 177.131   5
   5  -9   0 45.3301 72.6934   6
   5  -9   0 121.035 110.736   5
   5  -9   1 2619.18 258.943   5
   5  -9   1 2416.87 199.828   6
   5  -9   2 5079.38 291.928   6
   5  -9   2 4810.24 349.293   5
   5  -9   3 3473.14 255.434   6
   5  -9   3 3543.38 304.531   5
   5  -9   4 305.392 124.593   5
   5  -9   4 230.542 91.1885   6
   5  -9   5 1148.09 180.418   5
   5  -9   5 1024.06 167.429   6
   5  -9   6 6697.81 427.495   5
   5  -9   6 6437.62 400.168   6
   5  -9   7 3089.88 305.522   5
   5  -9   7 4121.55 336.027   6
   5  -9   8 545.378 145.853   6
   5  -9   8 531.816 153.654   5
   5  -9   9 589.647 163.166   6
   5  -9   9 454.387 138.626   5
   5  -9  10 3587.54 352.980   5
   5  -9  10 3967.19 362.335   6
   5  -9  11 8743.89 561.548   5
   5  -9  11 8928.98 545.455   6
   5  -9  12 7425.73 521.791   6
   5  -9  13 1762.35 291.258   6
   5  -9  14 1432.26 284.831   6
   5  -9  15 6703.07 550.313   6
   5  -8  -6 594.526 187.056   5
   5  -8  -5 6209.96 384.233   5
   5  -8  -4 2637.34 253.414   5
   5  -8  -3 609.368 126.950   5
   5  -8  -2 667.473 136.482   5
   5  -8  -1 6560.42 387.961   5
   5  -8  -1 6150.04 245.831   6
   5  -8   0 5835.39 359.438   5
   5  -8   0 5536.81 259.733   6
   5  -8   1 449.665 95.9134   6
   5  -8   1 418.706 120.430   5
   5  -8   2 1452.80 201.566   5
   5  -8   2 1245.89 148.107   6
   5  -8   3 6878.51 400.785   5
   5  -8   3 6418.35 336.607   6
   5  -8   4 11339.7 519.124   5
   5  -8   4 11516.8 460.167   6
   5  -8   5 7540.90 426.150   5
   5  -8   5 7964.28 408.129   6
   5  -8   6 1106.51 173.936   6
   5  -8   6 1175.38 191.057   5
   5  -8   7 5037.17 372.277   5
   5  -8   7 5079.68 357.190   6
   5  -8   8 11508.9 574.949   5
   5  -8   8 11085.2 539.338   6
   5  -8   9 11890.8 578.695   6
   5  -8  10 2115.48 275.392   6
   5  -8  11 68.2046 141.615   6
   5  -8  12 7459.39 516.731   6
   5  -8  13 7039.28 512.630   6
   5  -8  14 6227.45 496.733   6
   5  -8  15 306.260 186.804   6
   5  -8  16 1021.42 269.635   6
   5  -7  -6 570.546 166.597   5
   5  -7  -5-38.5168 103.870   5
   5  -7  -4 4327.56 299.663   5
   5  -7  -3 5466.73 329.483   5
   5  -7  -2 2156.04 209.015   5
   5  -7  -1 1786.27 128.402   6
   5  -7  -1 1534.48 176.783   5
   5  -7   0 7617.61 283.964   6
   5  -7   0 8014.32 397.155   5
   5  -7   1 15863.5 570.407   5
   5  -7   1 15752.4 449.641   6
   5  -7   2 14053.5 540.535   5
   5  -7   2 13697.9 439.927   6
   5  -7   3 1604.13 183.273   5
   5  -7   3 1962.08 187.432   6
   5  -7   4 731.302 122.494   6
   5  -7   4 689.710 125.997   5
   5  -7   5 8395.70 437.083   5
   5  -7   5 9010.89 419.033   6
   5  -7   6 17417.3 652.324   5
   5  -7   6 19190.8 635.652   6
   5  -7   7 15570.3 597.594   6
   5  -7   8 817.931 168.609   6
   5  -7   9 1626.12 227.233   6
   5  -7  10 8175.54 482.882   6
   5  -7  11 8433.15 501.820   6
   5  -7  12 2006.44 286.521   6
   5  -7  13 1114.45 231.818   6
   5  -7  14 3817.90 384.008   6
   5  -7  15 7122.83 530.129   6
   5  -7  16 2249.36 316.668   6
   5  -6  -6 2936.52 292.175   5
   5  -6  -5 6705.95 351.113   5
   5  -6  -4 3006.46 236.054   5
   5  -6  -3 320.439 103.922   5
   5  -6  -2 4990.39 306.914   5
   5  -6  -2 4321.44 156.420   6
   5  -6  -1 8276.78 384.642   5
   5  -6  -1 7929.86 249.208   6
   5  -6   0 31573.9 567.330   6
   5  -6   0 31982.9 760.332   5
   5  -6   1 3327.76 203.692   6
   5  -6   1 3003.28 245.791   5
   5  -6   2 448.512 105.620   5
   5  -6   2 463.034 100.377   6
   5  -6   3 5740.37 335.456   5
   5  -6   3 5892.45 300.539   6
   5  -6   4 6907.65 377.288   5
   5  -6   4 7376.15 357.000   6
   5  -6   5 5121.44 312.470   6
   5  -6   6 271.297 108.892   6
   5  -6   7 7373.46 400.662   6
   5  -6   8 12932.8 551.898   6
   5  -6   9 6843.08 418.742   6
   5  -6  10 557.885 157.245   6
   5  -6  11 530.361 169.650   6
   5  -6  12 3341.89 339.880   6
   5  -6  13 4148.83 376.664   6
   5  -6  14 1227.21 226.568   6
   5  -6  15 16.0629 138.509   6
   5  -6  16 2573.87 346.590   6
   5  -6  17 2311.87 339.171   6
   5  -5  -6 3793.17 323.347   5
   5  -5  -5 434.240 104.632   5
   5  -5  -4 9342.54 380.694   5
   5  -5  -3 14773.1 474.590   5
   5  -5  -2 8936.64 211.462   6
   5  -5  -2 10260.7 401.210   5
   5  -5  -1 145.495 63.6446   6
   5  -5  -1 3.04175 78.0461   5
   5  -5   0 3695.15 188.189   6
   5  -5   0 3514.52 245.978   5
   5  -5   1 30278.5 586.001   6
   5  -5   1 29845.9 718.971   5
   5  -5   2 23309.4 550.246   6
   5  -5   2 23960.3 648.529   5
   5  -5   3 4713.08 264.079   6
   5  -5   3 5256.03 308.769   5
   5  -5   4 842.773 131.625   6
   5  -5   5 10321.3 430.658   6
   5  -5   6 12394.4 486.465   6
   5  -5   7 10281.8 461.329   6
   5  -5   8-69.6035 114.250   6
   5  -5   9 2049.72 231.861   6
   5  -5  10 6654.03 421.181   6
   5  -5  11 4768.56 371.800   6
   5  -5  12-40.2585 133.331   6
   5  -5  13 5345.67 419.830   6
   5  -5  14 11487.8 624.458   6
   5  -5  15 5158.63 432.924   6
   5  -5  16 202.325 157.085   6
   5  -5  17 390.378 192.036   6
   5  -4  -5 11886.2 412.680   5
   5  -4  -4 1310.83 144.473   5
   5  -4  -3-5.75503 66.3966   5
   5  -4  -2 4594.07 253.750   5
   5  -4  -2 4013.13 137.914   6
   5  -4  -1 15434.7 325.804   6
   5  -4  -1 15498.8 470.330   5
   5  -4   0 17304.4 392.784   6
   5  -4   0 17603.4 514.236   5
   5  -4   1 5684.34 251.345   6
   5  -4   1 5759.77 292.313   5
   5  -4   2 3928.29 231.077   6
   5  -4   2 3678.11 245.490   5
   5  -4   3 10875.3 391.705   6
   5  -4   4 6473.22 315.106   6
   5  -4   5 621.751 125.747   6
   5  -4   6 1379.54 173.512   6
   5  -4   7 6874.95 378.669   6
   5  -4   8 17686.8 619.763   6
   5  -4   9 7266.59 415.298   6
   5  -4  10 190.825 136.775   6
   5  -4  11 913.400 190.867   6
   5  -4  12 6403.68 436.248   6
   5  -4  13 4218.31 374.110   6
   5  -4  14 276.111 135.543   6
   5  -4  15 1012.06 216.467   6
   5  -4  16 3813.76 386.798   6
   5  -4  17 2739.57 349.577   6
   5  -4  18 17.9941 157.068   6
   5  -3  -5 188.310 80.0663   5
   5  -3  -4 8062.30 311.524   5
   5  -3  -3 10220.0 350.879   5
   5  -3  -3 8011.00 154.714   6
   5  -3  -2 1789.29 98.8913   6
   5  -3  -2 1978.25 163.953   5
   5  -3  -1 746.187 111.479   5
   5  -3  -1 685.215 78.5580   6
   5  -3   0 5092.86 214.177   6
   5  -3   0 5008.80 252.422   5
   5  -3   1 7064.93 276.484   6
   5  -3   1 6958.23 314.755   5
   5  -3   2 3128.84 206.189   6
   5  -3   3 299.368 94.9995   6
   5  -3   4 835.093 133.734   6
   5  -3   5 9149.05 392.723   6
   5  -3   6 6476.80 349.592   6
   5  -3   7 1256.14 173.160   6
   5  -3   8 1090.25 174.605   6
   5  -3   9 8109.46 431.730   6
   5  -3  10 10405.5 506.766   6
   5  -3  11 598.633 161.302   6
   5  -3  12-124.954 115.922   6
   5  -3  13 3954.67 353.365   6
   5  -3  14 7021.83 478.140   6
   5  -3  15 2861.21 327.568   6
   5  -3  16-209.418 179.456   6
   5  -3  17 1462.90 258.838   6
   5  -3  18 3546.75 393.867   6
   5  -2  -5 9481.99 314.120   5
   5  -2  -4 862.331 44.9070   6
   5  -2  -4 1356.85 117.389   5
   5  -2  -4 954.623 48.2501   6
   5  -2  -3 1047.35 123.576   5
   5  -2  -3 767.433 64.1875   6
   5  -2  -2 7423.27 216.077   6
   5  -2  -2 7733.14 285.477   5
   5  -2  -1 6172.81 222.510   6
   5  -2  -1 6275.30 262.444   5
   5  -2   0 628.607 91.0397   6
   5  -2   0 589.220 87.7409   5
   5  -2   1 10.7548 70.0608   6
   5  -2   2 7004.56 294.105   6
   5  -2   3 10647.1 383.573   6
   5  -2   4 4027.14 250.447   6
   5  -2   5 398.785 113.765   6
   5  -2   6 510.412 128.181   6
   5  -2   7 6499.65 365.315   6
   5  -2   8 4136.94 308.993   6
   5  -2   9 471.984 136.938   6
   5  -2  10 1652.23 214.083   6
   5  -2  11 14035.4 608.955   6
   5  -2  12 4313.15 351.172   6
   5  -2  13 5681.85 414.977   6
   5  -2  14-116.472 143.490   6
   5  -2  15 5709.06 443.249   6
   5  -2  16 10910.6 625.664   6
   5  -2  17 2875.00 346.262   6
   5  -2  18-303.322 210.661   6
   5  -1  -6 259.888 31.2347   6
   5  -1  -5 1660.98 143.570   5
   5  -1  -5 1942.78 85.6933   6
   5  -1  -4 12212.9 311.210   5
   5  -1  -4 11266.1 230.041   6
   5  -1  -3 10401.7 293.058   5
   5  -1  -2 2650.34 151.841   5
   5  -1  -1 766.008 84.1410   5
   5  -1   0 4207.42 215.582   6
   5  -1   1 573.911 90.0320   6
   5  -1   2 2992.13 194.678   6
   5  -1   3 644.763 114.925   6
   5  -1   4 10674.2 410.703   6
   5  -1   5 9049.75 394.913   6
   5  -1   6 11173.4 455.767   6
   5  -1   7 2534.90 228.840   6
   5  -1   8 5497.74 350.780   6
   5  -1   9 15748.0 614.154   6
   5  -1  10 8898.74 471.112   6
   5  -1  11 1645.60 228.066   6
   5  -1  12 7392.04 457.309   6
   5  -1  13 5669.75 413.134   6
   5  -1  14 8516.35 517.113   6
   5  -1  15 1440.13 235.690   6
   5  -1  16 12.9992 144.814   6
   5  -1  17 5111.34 440.279   6
   5  -1  18 6697.48 514.550   6
   5  -1  19 3233.68 383.848   6
   5   0  -8 820.879 75.6257   6
   5   0  -7 8572.03 225.847   6
   5   0  -6 5013.68 174.111   6
   5   0  -5 648.766 69.7219   6
   5   0  -4 564.133 68.9351   5
   5   0  -4 595.667 65.0060   6
   5   0  -3 5341.37 186.031   5
   5   0  -2 14332.3 335.056   5
   5   0   4 3386.31 247.011   6
   5   0   5 7815.66 377.410   6
   5   0   6 11191.7 469.478   6
   5   0   7 18992.3 623.865   6
   5   0   8 7623.29 411.427   6
   5   0   9 24.8272 105.029   6
   5   0  10 14302.3 600.031   6
   5   0  11 21046.8 758.812   6
   5   0  12 13178.3 615.178   6
   5   0  13 186.353 122.605   6
   5   0  14 1712.46 253.565   6
   5   0  15 6912.14 478.529   6
   5   0  16 8892.80 559.091   6
   5   0  17 2203.63 302.017   6
   5   0  18 263.858 153.775   6
   5   0  19 2720.79 349.493   6
   5   1  -8 2692.50 156.446   6
   5   1  -7 1067.83 101.050   6
   5   1  -6 906.090 100.775   6
   5   1  -5 8968.05 269.464   6
   5   1  -4 12687.9 315.699   6
   5   1  -4 12538.2 231.110   5
   5   1  -3 4398.60 145.298   5
   5   1  -2 4738.96 174.633   5
   5   1   6 1620.76 201.794   6
   5   1   7 1629.97 209.710   6
   5   1   8 18644.7 658.886   6
   5   1   9 30341.2 858.145   6
   5   1  10 14633.2 608.964   6
   5   1  11 108.292 118.118   6
   5   1  12 13619.4 622.161   6
   5   1  13 15839.8 700.976   6
   5   1  14 8470.32 527.073   6
   5   1  15 378.978 164.245   6
   5   1  16 1518.67 249.409   6
   5   1  17 6235.34 481.025   6
   5   1  18 5041.45 438.859   6
   5   1  19 1673.40 287.626   6
   5   2  -9 442.686 87.9415   6
   5   2  -8 1302.67 127.366   6
   5   2  -7 14430.3 391.784   6
   5   2  -6 10253.9 324.892   6
   5   2  -5 283.078 75.6263   6
   5   2  -4 4782.52 213.794   6
   5   2  -3 13630.6 220.676   5
   5   2   8 5088.62 365.171   6
   5   2   9 1860.45 235.801   6
   5   2  10 18174.3 696.657   6
   5   2  11 20492.8 747.363   6
   5   2  12 9664.78 533.202   6
   5   2  13-164.095 144.770   6
   5   2  14 1210.79 220.233   6
   5   2  15 5304.24 437.826   6
   5   2  16 3213.05 351.554   6
   5   2  17 260.391 159.084   6
   5   2  18 278.127 160.282   6
   5   2  19 1530.22 266.061   6
   5   3  -8 1494.65 153.502   6
   5   3  -7 33.2226 64.6563   6
   5   3  -6 4411.03 233.384   6
   5   3  -5 15764.1 433.515   6
   5   3  -4 19695.9 473.567   6
   5   3   9 22065.4 764.330   6
   5   3  10 3764.81 334.870   6
   5   3  11 2005.42 260.329   6
   5   3  12 22151.2 806.214   6
   5   3  13 21898.6 820.667   6
   5   3  14 5263.07 418.698   6
   5   3  15-158.944 163.615   6
   5   3  16 2007.93 286.884   6
   5   3  17 6328.53 482.520   6
   5   3  18 2425.15 318.908   6
   5   3  19 119.343 161.557   6
   5   4  -7 8242.83 347.796   6
   5   4  -6 5171.22 269.904   6
   5   4  -5 137.240 75.8358   6
   5   4  -4 6625.78 298.342   6
   5   4  10 13201.2 617.041   6
   5   4  11 2970.46 309.637   6
   5   4  12 63.8633 127.451   6
   5   4  13 585.577 159.232   6
   5   4  14 1349.51 222.248   6
   5   4  15 3969.84 360.702   6
   5   4  16 1102.85 217.707   6
   5   4  17-81.0246 152.839   6
   5   4  18 3400.15 370.723   6
   5   4  19 3022.01 357.721   6
   5   5  -2 13282.4 276.349   5
   5   5  11 395.142 132.069   6
   5   5  12 4508.68 380.227   6
   5   5  13 4368.16 384.111   6
   5   5  14 232.273 137.410   6
   5   5  15 345.436 150.790   6
   5   5  16 2976.83 336.676   6
   5   5  17 1610.66 256.894   6
   5   5  18 1383.50 249.482   6
   5   5  19 33.6822 145.730   6
   5   6  -3 9646.97 183.436   5
   5   6  -2 7512.42 215.734   5
   5   6  -1 1071.22 115.732   5
   5   6  12 37.8385 144.920   6
   5   6  13 3515.18 354.737   6
   5   6  14 4319.78 389.000   6
   5   6  15 2585.45 295.256   6
   5   6  16 256.339 150.104   6
   5   6  17 1063.58 214.552   6
   5   6  18 4068.27 406.586   6
   5   6  19 4432.71 428.163   6
   5   7  -3 82.0493 34.1082   5
   5   7  -2 5246.01 197.142   5
   5   7  -1 12546.4 357.553   5
   5   7   0 8986.12 369.893   5
   5   7  13 1250.17 238.400   6
   5   7  14 308.917 155.681   6
   5   7  15 3824.07 372.295   6
   5   7  16 4657.51 405.022   6
   5   7  17 3565.94 363.703   6
   5   7  18 540.988 194.682   6
   5   7  19-216.753 156.280   6
   5   8  -3 7406.10 220.852   5
   5   8  -2 723.201 94.7996   5
   5   8  -1 5707.33 252.113   5
   5   8   0 11020.9 391.477   5
   5   8   1 8541.37 399.089   5
   5   8  14 5981.68 447.899   6
   5   8  15 2521.87 301.849   6
   5   8  16 8.68851 150.127   6
   5   8  17 1779.48 269.193   6
   5   8  18 2963.66 333.942   6
   5   9  -3 46.0035 52.3415   5
   5   9  -2 4289.44 211.588   5
   5   9  -1 3098.59 207.099   5
   5   9   0 424.428 119.194   5
   5   9   1 215.520 84.1406   5
   5   9  14 674.122 191.741   6
   5   9  15 1735.06 248.267   6
   5   9  16 3380.59 357.335   6
   5   9  17 1414.54 245.276   6
   5   9  18-158.592 186.979   6
   5  10  -3 8259.40 288.506   5
   5  10  -2 3406.80 203.281   5
   5  10  -1 7187.40 320.237   5
   5  10   0 32293.2 732.333   5
   5  10  15 400.166 141.442   6
   5  10  16-311.408 213.823   6
   5  10  17 1794.10 271.899   6
   5  11  15 2143.81 279.362   6
   5  11  16 777.429 175.446   6
   5  11  17 1383.95 248.110   6
   5  12  16 66.6658 133.991   6
   6 -15   6 687.830 210.510   6
   6 -15   7 2897.05 356.561   6
   6 -15   8 1783.95 294.240   6
   6 -14  -4 504.098 204.232   5
   6 -14  -3 788.086 224.327   5
   6 -14  -2-104.908 153.139   5
   6 -14  -1 168.605 169.777   5
   6 -14   0 1505.24 274.850   5
   6 -14   1 2129.51 293.675   5
   6 -14   2 500.348 161.624   5
   6 -14   3-210.371 210.461   5
   6 -14   4 1641.06 286.675   5
   6 -14   5 2495.03 300.025   6
   6 -14   5 2786.52 372.308   5
   6 -14   6 1724.72 270.339   6
   6 -14   7 270.137 163.632   6
   6 -14   8 1394.91 259.452   6
   6 -14   9 2136.59 333.690   6
   6 -13  -5 784.540 265.105   5
   6 -13  -4 237.827 143.853   5
   6 -13  -3 937.783 226.611   5
   6 -13  -2 1672.27 283.409   5
   6 -13  -1 1341.55 246.062   5
   6 -13   0-60.5813 168.784   5
   6 -13   1 520.918 175.809   5
   6 -13   2 3588.77 378.978   5
   6 -13   3 3238.38 290.215   6
   6 -13   3 3133.41 365.404   5
   6 -13   4 1271.34 194.466   6
   6 -13   4 1420.73 275.487   5
   6 -13   5-51.8776 132.581   6
   6 -13   5 161.859 129.760   5
   6 -13   6 1509.19 252.038   6
   6 -13   6 1532.49 266.906   5
   6 -13   7 3550.54 360.203   6
   6 -13   7 3423.50 390.044   5
   6 -13   8 3765.09 385.517   6
   6 -13   8 3760.45 410.344   5
   6 -13   9 221.674 176.410   6
   6 -13  10 762.943 245.756   6
   6 -12  -5 491.662 232.144   5
   6 -12  -4 1954.96 290.977   5
   6 -12  -3 1075.14 232.982   5
   6 -12  -2 196.568 134.222   5
   6 -12  -1 776.394 203.816   5
   6 -12   0 2952.72 334.202   5
   6 -12   1 3489.93 353.374   5
   6 -12   2 632.807 131.216   6
   6 -12   2 844.900 202.871   5
   6 -12   3 41.8833 99.0113   6
   6 -12   3 102.100 138.209   5
   6 -12   4 2602.37 273.897   6
   6 -12   4 2736.42 325.184   5
   6 -12   5 3832.17 333.443   6
   6 -12   5 3995.46 398.102   5
   6 -12   6 1144.95 236.832   5
   6 -12   6 1293.04 208.409   6
   6 -12   7-35.7494 140.468   5
   6 -12   7 92.6742 122.586   6
   6 -12   8 386.457 193.757   5
   6 -12   8 783.231 190.977   6
   6 -12   9 2546.02 339.954   5
   6 -12   9 2062.43 302.622   6
   6 -12  10 1277.37 251.138   5
   6 -12  10 1441.30 258.304   6
   6 -12  11-103.228 171.930   6
   6 -11  -5 232.122 176.080   5
   6 -11  -4-85.3554 148.298   5
   6 -11  -3 1470.40 233.702   5
   6 -11  -2 2766.94 301.154   5
   6 -11  -1 1637.30 234.419   5
   6 -11   0-113.568 138.112   5
   6 -11   1 252.233 82.5264   6
   6 -11   1 337.108 153.441   5
   6 -11   2 2450.44 230.554   6
   6 -11   2 2503.35 295.804   5
   6 -11   3 2599.73 243.552   6
   6 -11   3 2513.50 291.848   5
   6 -11   4 1276.47 208.631   5
   6 -11   4 1263.80 193.561   6
   6 -11   5 35.1837 133.139   5
   6 -11   5 163.646 118.132   6
   6 -11   6 1228.64 228.783   5
   6 -11   6 1192.88 200.464   6
   6 -11   7 1088.20 221.148   5
   6 -11   7 1049.11 204.523   6
   6 -11   8 922.706 222.231   5
   6 -11   8 671.790 188.619   6
   6 -11   9-93.7018 185.963   5
   6 -11   9 6.91860 129.273   6
   6 -11  10 381.277 160.371   5
   6 -11  10 398.136 160.110   6
   6 -11  11 1715.13 275.342   5
   6 -11  11 1875.47 304.957   6
   6 -11  12 528.767 199.783   6
   6 -11  12 96.6260 154.181   5
   6 -10  -6-199.227 163.337   5
   6 -10  -5 3443.68 336.497   5
   6 -10  -4 3142.32 319.425   5
   6 -10  -3 1744.36 247.852   5
   6 -10  -2 19.1895 118.198   5
   6 -10  -1 1654.88 232.334   5
   6 -10   0 2917.92 302.036   5
   6 -10   1 1074.02 148.125   6
   6 -10   1 1173.13 204.446   5
   6 -10   2-27.3315 98.2066   6
   6 -10   2-11.3130 114.896   5
   6 -10   3 627.463 178.379   5
   6 -10   3 332.482 111.943   6
   6 -10   4 2047.03 225.175   6
   6 -10   4 2140.16 277.480   5
   6 -10   5 3585.71 302.671   6
   6 -10   5 3995.05 373.849   5
   6 -10   6 836.498 195.512   5
   6 -10   6 695.639 164.999   6
   6 -10   7 318.240 133.912   5
   6 -10   7 401.790 144.982   6
   6 -10   8 2496.00 303.509   5
   6 -10   8 3278.48 336.875   6
   6 -10   9 3316.40 350.494   6
   6 -10   9 2566.24 327.802   5
   6 -10  10 1781.18 268.334   6
   6 -10  10 1199.63 235.961   5
   6 -10  11 145.301 178.790   6
   6 -10  11-239.839 237.312   5
   6 -10  12 1782.15 308.503   6
   6 -10  12 1482.91 263.801   5
   6 -10  13 2557.66 356.636   6
   6 -10  13 1822.11 317.204   5
   6  -9  -6 1328.49 273.973   5
   6  -9  -5 276.678 130.289   5
   6  -9  -4-22.7803 131.877   5
   6  -9  -3 1113.79 186.227   5
   6  -9  -2 1455.57 214.498   5
   6  -9  -1 1637.72 212.483   5
   6  -9   0 17.6281 79.4212   6
   6  -9   0 135.932 122.641   5
   6  -9   1 1210.15 149.610   6
   6  -9   1 1271.07 206.667   5
   6  -9   2 2949.40 234.577   6
   6  -9   2 3116.72 301.445   5
   6  -9   3 2112.69 205.318   6
   6  -9   3 2415.04 280.125   5
   6  -9   4 233.423 127.910   5
   6  -9   4 199.160 118.187   6
   6  -9   5 554.263 147.950   5
   6  -9   5 446.297 130.950   6
   6  -9   6 3649.78 337.758   5
   6  -9   6 4243.72 336.986   6
   6  -9   7 1973.10 247.752   6
   6  -9   7 1621.34 241.575   5
   6  -9   8 132.333 113.195   6
   6  -9   8-181.667 179.819   5
   6  -9   9 957.585 209.944   6
   6  -9   9 1056.29 196.807   5
   6  -9  10 4028.09 407.751   5
   6  -9  10 3439.16 363.065   6
   6  -9  11 2205.31 310.351   6
   6  -9  11 2573.78 320.083   5
   6  -9  12 1190.48 247.203   6
   6  -9  12 647.811 185.055   5
   6  -9  13 245.252 171.134   6
   6  -9  14 2204.67 328.061   6
   6  -8  -6 465.371 161.289   5
   6  -8  -5 2522.21 259.865   5
   6  -8  -4 1824.28 214.749   5
   6  -8  -3 406.820 129.411   5
   6  -8  -2 176.368 133.781   5
   6  -8  -1 2446.51 258.853   5
   6  -8  -1 2183.95 149.787   6
   6  -8   0 3581.52 297.702   5
   6  -8   0 3319.04 205.623   6
   6  -8   1 447.928 100.508   6
   6  -8   1 435.241 123.640   5
   6  -8   2 532.907 121.013   6
   6  -8   2 641.750 152.453   5
   6  -8   3 3073.28 282.613   5
   6  -8   3 2785.93 233.059   6
   6  -8   4 5375.55 377.215   5
   6  -8   4 5133.73 327.546   6
   6  -8   5 1606.12 224.109   5
   6  -8   5 1898.56 222.630   6
   6  -8   6 89.2056 102.507   6
   6  -8   6 58.1845 123.536   5
   6  -8   7 3569.28 342.713   5
   6  -8   7 3964.93 328.621   6
   6  -8   8 6271.29 446.805   5
   6  -8   8 7110.36 448.271   6
   6  -8   9 4057.52 363.673   6
   6  -8  10-105.840 131.867   6
   6  -8  11 1034.22 235.543   6
   6  -8  12 4378.76 417.215   6
   6  -8  13 3254.81 369.698   6
   6  -8  14 587.693 217.176   6
   6  -8  15-234.669 166.724   6
   6  -7  -6 828.840 196.434   5
   6  -7  -5-81.7890 108.950   5
   6  -7  -4 473.259 131.788   5
   6  -7  -3 1967.05 211.584   5
   6  -7  -2 2834.00 251.579   5
   6  -7  -1 1339.48 119.349   6
   6  -7  -1 1550.06 194.493   5
   6  -7   0 1640.37 148.070   6
   6  -7   0 1718.33 217.653   5
   6  -7   1 8941.44 455.203   5
   6  -7   1 8653.78 343.003   6
   6  -7   2 4217.59 323.000   5
   6  -7   2 4406.53 265.047   6
   6  -7   3-56.7682 127.607   5
   6  -7   3 283.896 101.486   6
   6  -7   4 2243.03 227.140   6
   6  -7   4 2171.12 231.836   5
   6  -7   5 5167.87 364.924   5
   6  -7   5 5449.32 339.307   6
   6  -7   6 4755.63 362.157   5
   6  -7   6 5049.59 341.904   6
   6  -7   7 4221.06 328.652   6
   6  -7   8 171.166 118.211   6
   6  -7   9 5137.06 391.173   6
   6  -7  10 6824.16 455.376   6
   6  -7  11 2494.85 295.828   6
   6  -7  12-131.025 177.563   6
   6  -7  13 5212.85 451.131   6
   6  -7  14 10397.7 636.740   6
   6  -7  15 6792.30 547.005   6
   6  -6  -6 1007.96 198.054   5
   6  -6  -5 4701.47 311.576   5
   6  -6  -4 1583.74 182.923   5
   6  -6  -3 272.959 117.208   5
   6  -6  -2 3836.94 288.314   5
   6  -6  -2 3518.51 144.635   6
   6  -6  -1 3907.11 278.298   5
   6  -6  -1 3760.23 178.876   6
   6  -6   0 8446.33 302.118   6
   6  -6   0 8634.86 419.665   5
   6  -6   1 3548.78 219.042   6
   6  -6   1 3500.00 274.670   5
   6  -6   2 39.5282 79.9897   6
   6  -6   2-127.317 118.892   5
   6  -6   3 3385.12 249.047   6
   6  -6   3 3109.27 260.427   5
   6  -6   4 7797.00 427.369   5
   6  -6   4 7530.12 370.212   6
   6  -6   5 1729.98 205.244   5
   6  -6   5 1657.60 187.697   6
   6  -6   6 2188.37 236.263   6
   6  -6   7 9865.84 480.297   6
   6  -6   8 14386.1 600.421   6
   6  -6   9 3281.56 307.048   6
   6  -6  10 87.0613 130.379   6
   6  -6  11 2111.97 280.053   6
   6  -6  12 5447.26 430.124   6
   6  -6  13 3111.38 345.991   6
   6  -6  14 172.948 149.105   6
   6  -6  15 514.364 181.881   6
   6  -6  16 3047.69 386.955   6
   6  -5  -6 397.929 125.632   5
   6  -5  -5 544.918 116.729   5
   6  -5  -4 2077.11 195.871   5
   6  -5  -3 3114.69 232.349   5
   6  -5  -2 221.868 43.4176   6
   6  -5  -2 266.369 99.3335   5
   6  -5  -1 2871.05 156.960   6
   6  -5  -1 2901.41 242.551   5
   6  -5   0 5587.36 242.898   6
   6  -5   0 5455.64 324.797   5
   6  -5   1 29360.5 607.608   6
   6  -5   1 30453.3 766.548   5
   6  -5   2 10009.1 378.181   6
   6  -5   2 9748.18 429.844   5
   6  -5   3 823.403 131.866   5
   6  -5   3 833.250 125.758   6
   6  -5   4 15387.2 525.536   6
   6  -5   5 16053.5 560.587   6
   6  -5   6 9670.00 451.419   6
   6  -5   7 931.158 160.281   6
   6  -5   8 1346.77 195.092   6
   6  -5   9 11287.9 547.894   6
   6  -5  10 18386.9 721.790   6
   6  -5  11 4750.74 391.984   6
   6  -5  12 137.664 131.727   6
   6  -5  13 4605.89 408.565   6
   6  -5  14 10868.2 626.468   6
   6  -5  15 6658.28 512.611   6
   6  -5  16 270.982 165.547   6
   6  -4  -6 1967.82 244.344   5
   6  -4  -5 3807.52 243.218   5
   6  -4  -4 184.371 88.6775   5
   6  -4  -3 1583.06 63.4546   6
   6  -4  -3 2725.95 213.206   5
   6  -4  -2 7483.79 345.179   5
   6  -4  -2 6564.12 197.539   6
   6  -4  -1 7348.69 243.916   6
   6  -4  -1 7015.69 338.792   5
   6  -4   0 132.007 79.4443   5
   6  -4   0 95.0899 76.9572   6
   6  -4   1 242.431 90.0161   6
   6  -4   1 111.056 99.8947   5
   6  -4   2 7763.70 335.576   6
   6  -4   2 7645.03 376.705   5
   6  -4   3 12064.0 432.772   6
   6  -4   4 4888.00 294.676   6
   6  -4   5 231.141 99.3183   6
   6  -4   6 4481.71 308.730   6
   6  -4   7 15738.0 590.257   6
   6  -4   8 11515.0 527.249   6
   6  -4   9 601.642 154.297   6
   6  -4  10 1380.62 224.156   6
   6  -4  11 6987.13 459.574   6
   6  -4  12 5497.26 431.613   6
   6  -4  13 4952.05 417.946   6
   6  -4  14 314.471 166.886   6
   6  -4  15 746.238 219.716   6
   6  -4  16 3342.58 388.935   6
   6  -4  17 2502.18 357.635   6
   6  -3  -5 3372.85 218.953   5
   6  -3  -4 9633.70 351.945   5
   6  -3  -3 8309.97 338.905   5
   6  -3  -3 7187.56 172.626   6
   6  -3  -2 186.087 91.9588   5
   6  -3  -2-1.49547 56.4733   6
   6  -3  -1 2542.39 148.479   6
   6  -3  -1 2586.47 201.399   5
   6  -3   0 12754.0 374.152   6
   6  -3   0 12733.9 446.092   5
   6  -3   1 7843.89 314.280   6
   6  -3   1 7972.87 357.167   5
   6  -3   2 5011.69 268.381   6
   6  -3   3 127.697 83.2255   6
   6  -3   4 11776.3 451.412   6
   6  -3   5 12382.0 488.879   6
   6  -3   6 8663.75 422.523   6
   6  -3   7 2381.47 237.992   6
   6  -3   8 501.194 145.954   6
   6  -3   9 7304.36 436.016   6
   6  -3  10 7499.04 457.038   6
   6  -3  11 681.396 164.745   6
   6  -3  12 41.9534 126.152   6
   6  -3  13 1457.99 255.164   6
   6  -3  14 4862.82 424.215   6
   6  -3  15 1844.43 296.865   6
   6  -3  16 30.0935 175.213   6
   6  -3  17 2687.11 347.673   6
   6  -2  -5 2722.43 178.447   5
   6  -2  -4 88.2073 68.1524   5
   6  -2  -4-3.86796 27.8674   6
   6  -2  -4 32.1461 23.2264   6
   6  -2  -3 6401.91 286.463   5
   6  -2  -3 6297.74 197.509   6
   6  -2  -2 7840.21 250.415   6
   6  -2  -2 7999.99 314.944   5
   6  -2  -1 5956.49 241.598   6
   6  -2  -1 6106.97 282.851   5
   6  -2   0 1487.29 135.959   6
   6  -2   0 1348.26 139.496   5
   6  -2   1 1488.44 143.415   6
   6  -2   2 11541.1 404.855   6
   6  -2   3 12133.6 433.973   6
   6  -2   4 5977.02 324.156   6
   6  -2   5 1079.68 156.383   6
   6  -2   6 4995.97 328.243   6
   6  -2   7 6632.13 398.001   6
   6  -2   8 2758.75 274.934   6
   6  -2   9 48.2305 113.480   6
   6  -2  10 2520.38 280.627   6
   6  -2  11 9265.88 521.021   6
   6  -2  12 1514.24 238.566   6
   6  -2  13 1144.80 226.401   6
   6  -2  14 334.597 157.933   6
   6  -2  15 3949.95 391.616   6
   6  -2  16 4354.76 432.257   6
   6  -2  17 699.506 208.408   6
   6  -1  -6 525.144 39.4428   6
   6  -1  -5 5600.93 169.365   6
   6  -1  -5 5936.75 233.904   5
   6  -1  -5 5766.70 161.618   6
   6  -1  -4 12867.5 343.889   5
   6  -1  -4 12702.6 273.546   6
   6  -1  -3 9920.65 313.541   5
   6  -1  -2 1053.01 103.092   5
   6  -1  -2 988.705 95.9612   6
   6  -1  -1 1756.16 142.819   6
   6  -1  -1 1639.34 135.099   5
   6  -1   0 11461.6 375.906   6
   6  -1   1 14832.8 451.319   6
   6  -1   2 1916.53 171.677   6
   6  -1   3 1961.37 183.059   6
   6  -1   4 6658.00 345.915   6
   6  -1   5 10538.8 450.652   6
   6  -1   6 2753.50 242.705   6
   6  -1   7 107.121 98.1620   6
   6  -1   8 2000.09 232.055   6
   6  -1   9 9122.23 503.377   6
   6  -1  10 4619.26 373.832   6
   6  -1  11 148.893 144.403   6
   6  -1  12 8334.83 519.552   6
   6  -1  13 2710.57 316.304   6
   6  -1  14 1872.50 270.580   6
   6  -1  15 1.62328 159.299   6
   6  -1  16 1389.47 262.229   6
   6  -1  17 4097.63 419.186   6
   6  -1  18 2609.46 365.363   6
   6   0  -6 4229.29 163.269   6
   6   0  -5 1715.75 113.327   6
   6   0  -4 129.825 47.4454   5
   6   0  -4 103.620 51.0822   6
   6   0  -3 9496.88 277.432   5
   6   0  -2 8000.79 278.097   5
   6   0  -1 9919.15 324.263   5
   6   0   3 12363.4 464.858   6
   6   0   4 995.764 153.355   6
   6   0   5 3911.52 288.354   6
   6   0   6 7401.63 411.429   6
   6   0   7 3838.87 310.323   6
   6   0   8 519.408 143.496   6
   6   0   9 984.721 182.372   6
   6   0  10 6619.33 439.349   6
   6   0  11 6169.66 449.358   6
   6   0  12 2795.65 324.446   6
   6   0  13 1830.44 261.083   6
   6   0  14 2557.62 324.201   6
   6   0  15 4103.86 407.585   6
   6   0  16 2625.31 331.017   6
   6   0  17-415.536 191.323   6
   6   0  18 1568.14 299.464   6
   6   1  -6 292.715 78.5144   6
   6   1  -5 7752.22 267.150   6
   6   1  -4 6823.93 184.517   5
   6   1  -3 2849.87 133.270   5
   6   1  -2 59.8750 47.0752   5
   6   1   5 12918.0 530.573   6
   6   1   6 208.616 123.582   6
   6   1   7 5672.59 385.037   6
   6   1   8 13706.3 605.030   6
   6   1   9 12968.8 599.490   6
   6   1  10 408.589 160.868   6
   6   1  11 2369.29 283.695   6
   6   1  12 8241.56 525.054   6
   6   1  13 14434.4 719.248   6
   6   1  14 4026.37 396.991   6
   6   1  15-134.648 160.923   6
   6   1  16 3352.97 370.790   6
   6   1  17 8146.60 584.173   6
   6   1  18 2859.33 371.058   6
   6   2  -7 3351.90 199.131   6
   6   2  -6 7500.68 286.243   6
   6   2  -5 4025.08 215.378   6
   6   2  -4-22.6397 21.0840   5
   6   2  -4 43.1450 61.9905   6
   6   2  -3 7433.75 190.613   5
   6   2  -2 15574.6 332.045   5
   6   2   7 4438.12 356.495   6
   6   2   8 148.241 121.275   6
   6   2   9 6900.17 462.292   6
   6   2  10 18132.9 746.307   6
   6   2  11 15991.8 714.745   6
   6   2  12 2121.22 294.352   6
   6   2  13 1042.42 228.462   6
   6   2  14 11195.9 642.920   6
   6   2  15 10940.5 672.579   6
   6   2  16 1748.95 300.017   6
   6   2  17-151.272 200.447   6
   6   2  18 2031.40 319.844   6
   6   3  -7 132.272 87.2200   6
   6   3  -6 1266.07 146.345   6
   6   3  -5 6382.69 289.546   6
   6   3  -4 3066.52 200.399   6
   6   3  -3 25.4755 22.3176   5
   6   3   9 12975.6 626.504   6
   6   3  10 163.946 130.844   6
   6   3  11 8546.05 534.198   6
   6   3  12 14341.3 704.120   6
   6   3  13 8563.62 553.007   6
   6   3  14 2097.64 300.443   6
   6   3  15 78.0878 150.357   6
   6   3  16 4705.94 448.264   6
   6   3  17 6568.01 531.937   6
   6   3  18 2926.09 366.717   6
   6   4  10 12375.2 641.429   6
   6   4  11 7018.83 501.554   6
   6   4  12 1170.54 233.598   6
   6   4  13 539.264 187.178   6
   6   4  14 5886.75 468.077   6
   6   4  15 6500.90 513.622   6
   6   4  16 1617.28 263.368   6
   6   4  17 580.926 184.379   6
   6   4  18 2635.38 364.655   6
   6   5  11 5707.87 457.139   6
   6   5  12 8583.29 563.569   6
   6   5  13 5242.09 452.232   6
   6   5  14-82.4369 180.298   6
   6   5  15 1672.57 289.147   6
   6   5  16 4798.73 448.400   6
   6   5  17 3336.41 390.012   6
   6   5  18 1665.33 310.827   6
   6   6  -2 300.595 49.3076   5
   6   6  12 183.767 179.737   6
   6   6  13 2888.56 355.110   6
   6   6  14 5292.03 457.370   6
   6   6  15 1614.28 272.414   6
   6   6  16-95.3834 158.525   6
   6   6  17 1590.76 267.883   6
   6   6  18 2752.30 361.176   6
   6   7  -3 207.013 33.2358   5
   6   7  -2 7207.89 221.463   5
   6   7  -1 11296.6 343.216   5
   6   7  13 1223.94 240.016   6
   6   7  14 453.871 181.672   6
   6   7  15 2623.73 339.480   6
   6   7  16 3064.10 358.911   6
   6   7  17 551.891 182.287   6
   6   8  -2 355.398 72.9794   5
   6   8  -1 1971.74 155.130   5
   6   8   0 5602.67 286.590   5
   6   8  14 2431.33 332.658   6
   6   8  15-1.42725 172.555   6
   6   8  16 164.344 149.169   6
   6   8  17 2414.22 320.097   6
   6   9  -1 14675.4 417.293   5
   6   9   0 2041.41 189.300   5
   6   9   1 4879.71 302.519   5
   6   9  14 2976.52 336.614   6
   6   9  15 3975.07 390.274   6
   6   9  16 1745.11 282.874   6
   6   9  17-32.0210 169.793   6
   6  10  15 69.7262 164.168   6
   6  10  16 292.712 145.947   6
   6  11  15 3521.70 383.364   6
   7 -13  -5-21.3814 206.074   5
   7 -13  -4-383.520 211.694   5
   7 -13  -3 476.355 191.179   5
   7 -13  -2 1238.02 256.514   5
   7 -13  -1 644.419 187.396   5
   7 -13   0 140.939 159.623   5
   7 -13   1 533.139 201.810   5
   7 -13   2 2872.91 343.905   5
   7 -13   3 1344.14 261.794   5
   7 -13   4 170.740 148.887   5
   7 -13   6 1594.56 266.426   6
   7 -13   7 797.567 227.449   6
   7 -13   8 138.984 158.836   6
   7 -13   9-247.911 202.574   6
   7 -12  -5 629.193 227.092   5
   7 -12  -4 995.736 251.979   5
   7 -12  -3 156.488 161.413   5
   7 -12  -2 350.245 153.343   5
   7 -12  -1 1232.98 237.833   5
   7 -12   0 1204.78 234.476   5
   7 -12   1-22.5256 164.500   5
   7 -12   2 137.391 157.928   5
   7 -12   3 1206.03 236.515   5
   7 -12   4 2151.23 315.258   5
   7 -12   5 1918.65 254.704   6
   7 -12   5 1887.60 288.575   5
   7 -12   6 274.424 169.581   5
   7 -12   6-2.96917 146.104   6
   7 -12   7 495.113 189.645   5
   7 -12   7 29.5955 152.445   6
   7 -12   8 1518.21 270.143   6
   7 -12   9 2546.00 339.956   6
   7 -12  10 1011.09 222.061   6
   7 -11  -5 208.073 166.796   5
   7 -11  -4 317.640 147.071   5
   7 -11  -3 985.098 202.436   5
   7 -11  -2 983.499 220.981   5
   7 -11  -1 193.714 167.555   5
   7 -11   0-23.4668 131.006   5
   7 -11   1 1805.30 286.877   5
   7 -11   2 2528.69 319.448   5
   7 -11   3 772.649 178.205   5
   7 -11   4-197.741 137.014   6
   7 -11   4-79.4470 163.165   5
   7 -11   5 740.778 187.136   5
   7 -11   5 837.470 185.130   6
   7 -11   6 3104.96 321.356   6
   7 -11   6 3400.58 384.601   5
   7 -11   7 1631.20 292.782   5
   7 -11   7 1373.64 224.400   6
   7 -11   8 149.617 146.884   5
   7 -11   8-18.3418 148.193   6
   7 -11   9 582.445 176.948   5
   7 -11   9 784.337 219.366   6
   7 -11  10 2192.98 326.660   6
   7 -11  11 2725.26 372.703   6
   7 -10  -5 2053.87 285.191   5
   7 -10  -4 1014.93 212.471   5
   7 -10  -3 84.0787 123.722   5
   7 -10  -2 708.786 189.429   5
   7 -10  -1 3283.23 327.408   5
   7 -10   0 2287.76 285.293   5
   7 -10   1 234.246 150.674   5
   7 -10   2 829.804 180.934   5
   7 -10   3 2817.40 258.346   6
   7 -10   3 2555.60 306.975   5
   7 -10   4 3878.44 303.430   6
   7 -10   4 4532.50 402.969   5
   7 -10   5 2333.80 256.778   6
   7 -10   5 2341.75 310.518   5
   7 -10   6 332.547 136.970   5
   7 -10   6 258.161 131.630   6
   7 -10   7 1275.76 246.816   5
   7 -10   7 1289.93 221.992   6
   7 -10   8 3446.46 381.527   5
   7 -10   8 3649.52 358.450   6
   7 -10   9 2801.59 344.605   5
   7 -10   9 3127.16 350.023   6
   7 -10  10 874.825 233.798   6
   7 -10  10 82.8602 156.678   5
   7 -10  11 164.531 148.310   6
   7 -10  11-140.353 215.596   5
   7 -10  12 1720.83 295.689   6
   7  -9  -6 156.592 170.122   5
   7  -9  -5-149.018 150.707   5
   7  -9  -4 1917.98 258.889   5
   7  -9  -3 2577.60 284.769   5
   7  -9  -2 822.747 171.593   5
   7  -9  -1 168.377 138.374   5
   7  -9   0 1830.68 255.991   5
   7  -9   1 4963.49 389.170   5
   7  -9   2 4014.99 273.421   6
   7  -9   2 4225.08 370.571   5
   7  -9   3 729.890 140.550   6
   7  -9   3 777.690 195.178   5
   7  -9   4 345.926 153.403   5
   7  -9   4 160.165 112.776   6
   7  -9   5 1917.78 265.506   5
   7  -9   5 2370.51 263.684   6
   7  -9   6 4056.06 386.547   5
   7  -9   6 4427.71 348.905   6
   7  -9   7 3134.91 338.948   5
   7  -9   7 3422.06 326.996   6
   7  -9   8 8.31962 135.229   6
   7  -9   8-21.0277 134.461   5
   7  -9   9 363.429 170.687   6
   7  -9   9 138.582 172.313   5
   7  -9  10 2105.30 293.668   6
   7  -9  10 1930.35 298.378   5
   7  -9  11 1185.44 243.704   6
   7  -9  11 1291.93 263.539   5
   7  -9  12 81.7150 143.680   6
   7  -9  12-241.503 209.468   5
   7  -9  13 810.677 224.623   6
   7  -8  -6 973.359 241.765   5
   7  -8  -5 1959.46 241.521   5
   7  -8  -4 1434.04 212.002   5
   7  -8  -3-3.82014 112.939   5
   7  -8  -2 1101.93 190.477   5
   7  -8  -1 1528.41 229.423   5
   7  -8   0 6691.12 423.757   5
   7  -8   1 1265.20 149.039   6
   7  -8   1 1570.26 230.186   5
   7  -8   2 39.1628 88.2456   6
   7  -8   2-79.6320 110.879   5
   7  -8   3 1326.44 174.190   6
   7  -8   3 1301.86 222.589   5
   7  -8   4 1062.98 195.164   5
   7  -8   4 761.894 159.679   6
   7  -8   5 519.403 169.483   5
   7  -8   5 636.953 146.104   6
   7  -8   6-17.4674 111.946   6
   7  -8   6-174.935 139.031   5
   7  -8   7 1505.00 219.712   6
   7  -8   7 1504.04 258.135   5
   7  -8   8 2902.05 340.068   5
   7  -8   8 3071.18 315.692   6
   7  -8   9 1074.83 223.027   6
   7  -8   9 810.756 193.602   5
   7  -8  10 127.991 151.430   6
   7  -8  11 629.671 211.407   6
   7  -8  12 1210.03 260.344   6
   7  -8  13 486.505 203.709   6
   7  -8  14 223.427 202.729   6
   7  -7  -6 1260.37 243.352   5
   7  -7  -5 4.01236 125.504   5
   7  -7  -4 1796.11 224.163   5
   7  -7  -3 3918.38 308.658   5
   7  -7  -2 3465.76 291.960   5
   7  -7  -1 56.9669 98.9068   5
   7  -7   0 498.856 93.4244   6
   7  -7   0 567.973 164.260   5
   7  -7   1 8500.56 350.785   6
   7  -7   1 9401.23 484.607   5
   7  -7   2 5264.94 302.490   6
   7  -7   2 5114.90 370.594   5
   7  -7   3 1232.06 171.275   6
   7  -7   3 955.271 188.974   5
   7  -7   4 192.116 114.125   5
   7  -7   4 330.565 123.834   6
   7  -7   5 2722.46 256.840   6
   7  -7   5 2478.94 271.293   5
   7  -7   6 2819.90 311.031   5
   7  -7   6 2887.38 284.413   6
   7  -7   7 1527.44 208.477   6
   7  -7   7 1237.09 219.039   5
   7  -7   8 110.085 133.013   6
   7  -7   9 1431.89 235.803   6
   7  -7  10 2167.79 287.339   6
   7  -7  11 809.983 205.820   6
   7  -7  12-139.935 162.094   6
   7  -7  13 3225.55 372.972   6
   7  -7  14 7044.82 553.529   6
   7  -6  -6 1417.45 247.925   5
   7  -6  -5 3713.58 289.611   5
   7  -6  -4 768.091 147.729   5
   7  -6  -3 393.881 120.883   5
   7  -6  -2 887.399 181.604   5
   7  -6  -1 3130.01 278.072   5
   7  -6  -1 2773.62 162.672   6
   7  -6   0 1910.81 222.538   5
   7  -6   0 1771.43 157.655   6
   7  -6   1 1294.14 148.510   6
   7  -6   1 1345.93 195.987   5
   7  -6   2 980.158 142.162   6
   7  -6   2 870.662 162.237   5
   7  -6   3 3524.43 256.022   6
   7  -6   3 3250.89 288.492   5
   7  -6   4 1471.62 198.893   5
   7  -6   4 1598.50 193.542   6
   7  -6   5 2.04270 126.420   5
   7  -6   5 72.2424 92.1649   6
   7  -6   6 2541.09 256.546   6
   7  -6   7 4430.23 340.791   6
   7  -6   8 5168.41 382.498   6
   7  -6   9 1300.37 225.779   6
   7  -6  10 915.253 194.754   6
   7  -6  11 2220.91 296.302   6
   7  -6  12 3309.24 371.011   6
   7  -6  13 1175.53 241.637   6
   7  -6  14-85.6850 155.498   6
   7  -6  15 2127.47 329.115   6
   7  -5  -6 745.695 179.058   5
   7  -5  -5 237.639 107.769   5
   7  -5  -4 2696.61 235.757   5
   7  -5  -3 1629.05 186.147   5
   7  -5  -2 200.818 43.6740   6
   7  -5  -2 384.314 111.961   5
   7  -5  -1 668.797 93.4268   6
   7  -5  -1 835.791 152.468   5
   7  -5   0 3434.31 203.013   6
   7  -5   0 3689.82 285.673   5
   7  -5   1 3645.81 224.416   6
   7  -5   1 3267.45 276.179   5
   7  -5   2 489.068 130.150   5
   7  -5   2 418.454 95.6021   6
   7  -5   3 393.592 112.156   6
   7  -5   3 220.663 98.5522   5
   7  -5   4 2628.34 229.868   6
   7  -5   4 2811.66 272.695   5
   7  -5   5 3522.87 279.167   6
   7  -5   6 2075.97 227.997   6
   7  -5   7-98.3700 103.729   6
   7  -5   8 1871.43 239.157   6
   7  -5   9 7470.57 468.601   6
   7  -5  10 6548.13 449.928   6
   7  -5  11-34.2951 155.561   6
   7  -5  12 247.946 166.756   6
   7  -5  13 3784.38 392.555   6
   7  -5  14 5907.33 489.128   6
   7  -5  15 2415.94 344.009   6
   7  -4  -5 1513.66 169.278   5
   7  -4  -4-34.3147 91.3373   5
   7  -4  -3 2005.45 197.966   5
   7  -4  -2 3688.12 264.807   5
   7  -4  -2 3152.44 146.362   6
   7  -4  -1 1821.48 134.303   6
   7  -4  -1 1949.52 199.381   5
   7  -4   0 23.7088 97.7965   5
   7  -4   0-152.495 104.098   6
   7  -4   1 1492.73 183.093   5
   7  -4   1 1486.84 150.355   6
   7  -4   2 6102.24 319.625   6
   7  -4   2 5907.87 360.039   5
   7  -4   3 5989.55 328.680   6
   7  -4   3 6017.98 370.583   5
   7  -4   4 1052.07 167.326   6
   7  -4   5 469.619 133.420   6
   7  -4   6 4110.85 311.320   6
   7  -4   7 5888.49 383.561   6
   7  -4   8 2024.56 242.968   6
   7  -4   9-11.7894 129.044   6
   7  -4  10 2726.59 309.294   6
   7  -4  11 11895.6 626.758   6
   7  -4  12 3751.20 376.599   6
   7  -4  13 2669.95 335.243   6
   7  -4  14-256.532 206.089   6
   7  -4  15 3363.62 384.055   6
   7  -4  16 6619.37 561.089   6
   7  -3  -5 1584.20 160.284   5
   7  -3  -4 4302.05 250.938   5
   7  -3  -3 1687.44 173.450   5
   7  -3  -3 1508.91 88.6124   6
   7  -3  -2 124.255 97.7940   5
   7  -3  -2-160.787 80.3130   6
   7  -3  -1 3156.61 180.096   6
   7  -3  -1 3803.83 261.617   5
   7  -3   0 4316.81 233.019   6
   7  -3   0 4333.07 280.072   5
   7  -3   1 831.922 104.651   6
   7  -3   1 869.599 128.857   5
   7  -3   2-13.6765 87.5933   6
   7  -3   2 84.2249 92.5417   5
   7  -3   3 3741.86 265.276   6
   7  -3   4 9784.24 439.575   6
   7  -3   5 6362.26 371.225   6
   7  -3   6 2257.69 230.376   6
   7  -3   7-83.0071 114.578   6
   7  -3   8 4465.57 349.069   6
   7  -3   9 10789.1 552.116   6
   7  -3  10 4702.47 386.718   6
   7  -3  11 346.734 152.459   6
   7  -3  12 5612.25 451.796   6
   7  -3  13 4531.09 422.538   6
   7  -3  14 5445.05 474.879   6
   7  -3  15 1051.99 257.862   6
   7  -3  16 527.590 161.064   6
   7  -2  -5 43.6062 66.9802   5
   7  -2  -4 2937.21 196.468   5
   7  -2  -4 2389.41 101.025   6
   7  -2  -3 8749.08 352.395   5
   7  -2  -3 8058.52 247.428   6
   7  -2  -2 6385.56 249.508   6
   7  -2  -2 6113.41 295.243   5
   7  -2  -1 3883.06 210.987   6
   7  -2  -1 3802.13 239.452   5
   7  -2   0 193.423 88.8268   6
   7  -2   0 109.787 80.9768   5
   7  -2   1 7258.53 329.032   6
   7  -2   1 7061.01 351.953   5
   7  -2   2 10067.4 398.705   6
   7  -2   3 7679.36 367.809   6
   7  -2   4 388.244 106.665   6
   7  -2   5 5915.39 359.840   6
   7  -2   6 9743.28 480.328   6
   7  -2   7 10163.1 512.522   6
   7  -2   8 3363.58 314.071   6
   7  -2   9 406.938 142.216   6
   7  -2  10 8489.18 515.908   6
   7  -2  11 9862.83 570.008   6
   7  -2  12 5796.38 454.599   6
   7  -2  13-217.268 166.406   6
   7  -2  14 1889.21 316.413   6
   7  -2  15 4318.10 436.948   6
   7  -2  16 3233.97 399.978   6
   7  -1  -5 4293.28 154.694   6
   7  -1  -5 4679.44 221.681   5
   7  -1  -4 4078.91 176.289   6
   7  -1  -4 4001.45 208.415   5
   7  -1  -3 615.291 75.2363   6
   7  -1  -3 632.038 92.7218   5
   7  -1  -2 2087.62 154.489   6
   7  -1  -2 2076.63 163.749   5
   7  -1  -1 11349.2 378.373   6
   7  -1  -1 10934.0 388.183   5
   7  -1   0 14560.1 450.547   6
   7  -1   0 13744.1 450.259   5
   7  -1   1 4958.87 273.256   6
   7  -1   2-66.5321 113.566   6
   7  -1   3 7243.60 364.626   6
   7  -1   4 12411.6 499.355   6
   7  -1   5 14355.8 553.260   6
   7  -1   6 269.949 107.033   6
   7  -1   7 946.302 175.115   6
   7  -1   8 6557.65 428.596   6
   7  -1   9 9624.17 540.193   6
   7  -1  10 3284.90 344.710   6
   7  -1  11 132.678 146.072   6
   7  -1  12 4967.99 431.727   6
   7  -1  13 7142.87 532.961   6
   7  -1  14 1852.91 317.013   6
   7  -1  15 34.1947 154.497   6
   7  -1  16 1315.83 261.597   6
   7  -1  17 2634.40 378.602   6
   7   0  -4 2416.61 141.911   5
   7   0  -3 8951.06 295.440   5
   7   0  -2 5654.99 254.971   5
   7   0  -1 951.192 114.857   5
   7   0   1 4488.75 272.613   6
   7   0   2 8195.18 378.478   6
   7   0   3 6921.74 363.449   6
   7   0   4 21.8662 114.730   6
   7   0   5 1107.02 180.677   6
   7   0   6 14750.3 600.085   6
   7   0   7 8676.79 479.299   6
   7   0   8 1243.11 201.825   6
   7   0   9 1538.38 242.495   6
   7   0  10 6306.32 451.749   6
   7   0  11 6933.96 494.757   6
   7   0  12 1513.12 265.434   6
   7   0  13 290.966 178.998   6
   7   0  14 1579.31 281.909   6
   7   0  15 1817.07 315.211   6
   7   0  16 536.106 212.425   6
   7   0  17 423.250 203.557   6
   7   1  -4 5832.50 186.368   5
   7   1  -3 1013.19 94.3330   5
   7   1  -2 1494.37 132.285   5
   7   1  -1 8050.11 308.118   5
   7   1   5 7063.04 413.137   6
   7   1   6 63.7565 112.739   6
   7   1   7 9958.44 527.930   6
   7   1   8 9641.56 532.602   6
   7   1   9 3468.96 345.103   6
   7   1  10-14.8702 148.792   6
   7   1  11 1948.56 282.557   6
   7   1  12 9064.25 591.327   6
   7   1  13 11264.6 681.173   6
   7   1  14 1797.15 313.211   6
   7   1  15 191.060 184.582   6
   7   1  16 2618.86 365.489   6
   7   1  17 4260.33 462.241   6
   7   2  -4 2187.15 172.568   6
   7   2  -4 1487.88 69.9161   5
   7   2  -3 7325.83 211.202   5
   7   2  -2 6543.57 232.179   5
   7   2   7 4433.72 361.322   6
   7   2   8-70.5519 147.048   6
   7   2   9 3234.34 343.594   6
   7   2  10 7292.03 507.392   6
   7   2  11 1539.36 256.385   6
   7   2  12 416.029 173.945   6
   7   2  13 3850.34 407.880   6
   7   2  14 2993.88 377.005   6
   7   2  15 2045.76 318.839   6
   7   2  16-34.0826 165.802   6
   7   2  17 457.246 222.885   6
   7   3  -3 37.4534 28.2564   5
   7   3  -2 2245.84 129.644   5
   7   3   8 5004.12 408.982   6
   7   3   9 1952.19 282.044   6
   7   3  10-234.181 166.640   6
   7   3  11 2540.50 326.491   6
   7   3  12 3100.57 363.729   6
   7   3  13 2981.75 360.453   6
   7   3  14-41.2205 176.497   6
   7   3  15 1536.52 293.566   6
   7   3  16 5397.32 521.092   6
   7   3  17 1934.74 318.232   6
   7   4  -3 2108.15 77.1440   5
   7   4  10 12702.4 692.089   6
   7   4  11 2191.82 317.211   6
   7   4  12 1325.50 274.362   6
   7   4  13 6723.74 546.332   6
   7   4  14 6972.27 559.815   6
   7   4  15 2683.43 350.054   6
   7   4  16 230.356 172.910   6
   7   4  17 1670.61 314.883   6
   7   5  11 10445.0 651.561   6
   7   5  12 9506.03 636.391   6
   7   5  13 1708.97 300.651   6
   7   5  14 360.715 177.515   6
   7   5  15 5882.58 526.573   6
   7   5  16 5901.22 535.801   6
   7   5  17 2811.23 385.025   6
   7   6  12 2163.55 317.531   6
   7   6  13 6903.35 544.369   6
   7   6  14 5587.90 516.513   6
   7   6  15 1318.42 259.365   6
   7   6  16-19.4925 165.389   6
   7   7  13 357.496 195.911   6
   7   7  14 1776.69 284.369   6
   7   7  15 2758.45 372.797   6
   7   7  16 2872.85 366.270   6
   7   8  13 5644.98 506.644   6
   7   8  14 2376.87 355.021   6
   7   8  15-87.4216 210.231   6
   7   8  16-39.0152 165.428   6
   7   9  14 2827.61 378.404   6
   7   9  15 2563.48 350.445   6
   8 -12  -4 746.962 221.467   5
   8 -12  -3 38.2893 179.905   5
   8 -12  -2-114.952 152.496   5
   8 -12  -1 774.547 229.850   5
   8 -12   0 613.719 193.204   5
   8 -12   1-83.7226 169.420   5
   8 -12   2 96.4084 165.727   5
   8 -12   8 1527.69 285.260   6
   8 -12   9 915.986 260.119   6
   8 -11  -5-53.4464 174.725   5
   8 -11  -4 283.978 185.870   5
   8 -11  -3 523.181 172.730   5
   8 -11  -2 129.685 163.038   5
   8 -11  -1 17.7390 145.327   5
   8 -11   0 481.217 178.144   5
   8 -11   1 1067.25 250.177   5
   8 -11   2 1073.42 239.504   5
   8 -11   3 5.80404 173.137   5
   8 -11   4 55.3356 146.785   5
   8 -11   5 977.865 236.097   5
   8 -11   6 2562.42 358.011   5
   8 -11   7 551.190 181.848   6
   8 -11   8-66.6604 146.964   6
   8 -11   9 1483.58 276.755   6
   8 -11  10 1876.48 334.239   6
   8 -10  -5 433.116 196.427   5
   8 -10  -4 286.671 186.062   5
   8 -10  -3-17.7338 127.343   5
   8 -10  -2 456.407 184.620   5
   8 -10  -1 1059.85 226.364   5
   8 -10   0 1127.21 223.736   5
   8 -10   1-184.975 149.368   5
   8 -10   2 1367.16 263.758   5
   8 -10   3 1956.35 285.757   5
   8 -10   4 1945.55 292.053   5
   8 -10   5 38.4796 145.486   5
   8 -10   5 137.173 120.788   6
   8 -10   6 168.079 147.360   5
   8 -10   6 12.5337 130.931   6
   8 -10   7 2753.26 355.622   5
   8 -10   7 2393.74 317.063   6
   8 -10   8 3740.68 417.774   5
   8 -10   8 3220.92 352.753   6
   8 -10   9 1487.37 268.082   6
   8 -10  10 109.361 158.922   6
   8 -10  11 1180.89 247.369   6
   8  -9  -5-90.1951 143.350   5
   8  -9  -4 981.716 200.288   5
   8  -9  -3 429.005 146.331   5
   8  -9  -2 270.936 130.331   5
   8  -9  -1-56.8188 131.819   5
   8  -9   0 1260.37 235.087   5
   8  -9   1 3941.58 373.746   5
   8  -9   2 1891.68 272.112   5
   8  -9   3 168.713 146.267   5
   8  -9   4 1654.83 219.866   6
   8  -9   4 1477.60 245.166   5
   8  -9   5 3493.74 367.742   5
   8  -9   5 3844.47 324.563   6
   8  -9   6 1783.34 289.489   5
   8  -9   6 1880.35 252.606   6
   8  -9   7 629.606 183.285   5
   8  -9   7 909.318 193.463   6
   8  -9   8 76.9613 155.360   5
   8  -9   8 121.753 132.669   6
   8  -9   9 2372.05 312.007   6
   8  -9   9 1992.78 306.009   5
   8  -9  10 2710.64 349.937   6
   8  -9  10 2522.27 364.303   5
   8  -9  11 726.177 213.025   6
   8  -9  12 201.371 177.421   6
   8  -8  -5 1510.59 244.040   5
   8  -8  -4 3.92776 134.118   5
   8  -8  -3 172.462 124.996   5
   8  -8  -2 2175.17 270.246   5
   8  -8  -1 2107.05 264.487   5
   8  -8   0 1737.88 234.701   5
   8  -8   1-28.7840 115.070   5
   8  -8   2 281.410 158.792   5
   8  -8   3 1179.75 177.274   6
   8  -8   3 1349.86 238.879   5
   8  -8   4 1286.20 188.181   6
   8  -8   4 1097.76 218.235   5
   8  -8   5 456.715 168.413   5
   8  -8   5 268.709 118.856   6
   8  -8   6 677.260 179.475   5
   8  -8   6 857.565 192.600   6
   8  -8   7 2737.61 345.539   5
   8  -8   7 2964.68 323.577   6
   8  -8   8 4754.57 448.263   5
   8  -8   8 5519.98 422.570   6
   8  -8   9 1150.38 229.283   6
   8  -8   9 1228.49 361.797   5
   8  -8  10-68.1278 160.085   6
   8  -8  10-106.947 178.888   5
   8  -8  11 1030.08 234.033   6
   8  -8  11 293.417 150.991   5
   8  -8  12 1107.36 253.875   6
   8  -7  -5 524.503 153.688   5
   8  -7  -4 1170.97 182.739   5
   8  -7  -3 1120.18 190.326   5
   8  -7  -2 101.545 118.046   5
   8  -7  -1 1341.20 217.495   5
   8  -7   0 2045.19 263.795   5
   8  -7   1 7297.63 459.629   5
   8  -7   2 4837.54 298.527   6
   8  -7   2 4418.96 365.469   5
   8  -7   3 172.290 105.148   6
   8  -7   3-168.477 159.216   5
   8  -7   4 4146.52 317.165   6
   8  -7   4 3878.59 360.187   5
   8  -7   5 6353.71 462.803   5
   8  -7   5 6492.32 403.281   6
   8  -7   6 3370.62 348.258   5
   8  -7   6 3064.10 288.036   6
   8  -7   7 189.176 133.356   6
   8  -7   7-229.029 185.961   5
   8  -7   8 649.131 165.370   6
   8  -7   8 297.165 146.125   5
   8  -7   9 2690.97 311.778   6
   8  -7  10 3630.84 374.565   6
   8  -7  11 713.924 215.891   6
   8  -7  12 6.36239 143.796   6
   8  -7  13 1241.40 268.065   6
   8  -6  -5 1440.62 197.014   5
   8  -6  -4 161.372 114.270   5
   8  -6  -3 455.730 139.392   5
   8  -6  -2 2492.86 262.616   5
   8  -6  -1 2942.14 279.039   5
   8  -6   0-37.0575 113.844   5
   8  -6   1 83.8630 94.1078   6
   8  -6   1 103.056 103.428   5
   8  -6   2 1601.66 219.212   5
   8  -6   2 1762.82 188.204   6
   8  -6   3 2576.48 267.973   5
   8  -6   3 2958.03 246.071   6
   8  -6   4 688.464 153.009   6
   8  -6   4 382.186 131.973   5
   8  -6   5-198.906 176.367   5
   8  -6   5 58.2842 104.511   6
   8  -6   6 420.798 135.316   5
   8  -6   6 600.655 160.005   6
   8  -6   7 2802.01 293.449   6
   8  -6   8 2574.32 288.116   6
   8  -6   9 75.9110 136.963   6
   8  -6  10 632.498 191.657   6
   8  -6  11 2881.74 339.184   6
   8  -6  12 966.829 222.870   6
   8  -6  13 795.285 225.317   6
   8  -6  14 43.2135 164.624   6
   8  -5  -5 730.897 148.027   5
   8  -5  -4 2644.60 238.770   5
   8  -5  -3 2306.48 224.376   5
   8  -5  -2 482.902 138.176   5
   8  -5  -1 575.250 151.041   5
   8  -5   0 3238.54 288.636   5
   8  -5   1 1402.05 205.735   5
   8  -5   1 1287.71 148.469   6
   8  -5   2 1345.59 194.684   5
   8  -5   2 1112.95 147.659   6
   8  -5   3 100.296 106.929   6
   8  -5   3-132.895 143.094   5
   8  -5   4 2605.64 242.807   6
   8  -5   4 2492.77 270.403   5
   8  -5   5 2574.46 263.944   6
   8  -5   5 2386.84 276.564   5
   8  -5   6 1556.35 221.496   6
   8  -5   7 100.920 110.005   6
   8  -5   8 292.586 116.381   6
   8  -5   9 1496.27 224.713   6
   8  -5  10 875.053 209.780   6
   8  -5  11-82.9134 151.216   6
   8  -5  12 702.634 203.596   6
   8  -5  13 623.688 197.640   6
   8  -5  14 1198.58 256.420   6
   8  -4  -5 804.683 129.291   5
   8  -4  -4-31.6326 91.3998   5
   8  -4  -3 1404.47 177.677   5
   8  -4  -2 3021.69 272.740   5
   8  -4  -1 1507.45 192.633   5
   8  -4   0 166.677 110.978   5
   8  -4   0-9.09470 104.214   6
   8  -4   1 583.056 131.972   5
   8  -4   1 634.706 101.661   6
   8  -4   2 2280.51 213.473   6
   8  -4   2 1656.93 209.227   5
   8  -4   3 2786.42 245.136   6
   8  -4   3 2622.36 261.029   5
   8  -4   4 1223.54 177.171   6
   8  -4   4 739.849 133.333   5
   8  -4   5 683.186 148.562   6
   8  -4   6 2321.41 251.149   6
   8  -4   7 2065.87 245.500   6
   8  -4   8 607.461 166.981   6
   8  -4   9 305.832 137.058   6
   8  -4  10 3132.57 336.434   6
   8  -4  11 5210.57 442.506   6
   8  -4  12 797.130 212.735   6
   8  -4  13-121.961 199.346   6
   8  -4  14 351.058 172.549   6
   8  -3  -4 3885.11 260.084   5
   8  -3  -3 1908.75 177.137   5
   8  -3  -2 360.883 128.180   5
   8  -3  -1 891.910 160.178   5
   8  -3  -1 613.703 94.8940   6
   8  -3   0 2781.55 199.134   6
   8  -3   0 2983.09 252.096   5
   8  -3   1 2665.18 203.374   6
   8  -3   1 2617.69 241.270   5
   8  -3   2 91.6708 73.6412   6
   8  -3   2-175.156 121.901   5
   8  -3   3 1909.94 204.112   6
   8  -3   4 3224.79 272.392   6
   8  -3   5 3162.28 276.138   6
   8  -3   6 209.570 130.067   6
   8  -3   7 362.726 131.663   6
   8  -3   8 2282.11 271.654   6
   8  -3   9 2881.82 301.232   6
   8  -3  10 774.025 175.489   6
   8  -3  11-43.4188 132.883   6
   8  -3  12 6233.39 490.633   6
   8  -3  13 3508.69 394.386   6
   8  -3  14 1383.72 287.582   6
   8  -3  15 689.568 218.877   6
   8  -2  -4 558.822 111.845   5
   8  -2  -3 3188.65 223.493   5
   8  -2  -2 3282.05 190.013   6
   8  -2  -2 3079.95 234.473   5
   8  -2  -1 866.894 139.388   5
   8  -2  -1 808.012 109.854   6
   8  -2   0 175.645 95.7217   5
   8  -2   0 195.245 70.7350   6
   8  -2   1 3031.63 230.980   6
   8  -2   1 2743.81 235.609   5
   8  -2   2 4605.93 288.345   6
   8  -2   3 2997.37 248.254   6
   8  -2   4 140.339 108.485   6
   8  -2   5 3974.14 319.760   6
   8  -2   6 8076.97 462.611   6
   8  -2   7 2900.70 292.385   6
   8  -2   8 12.5129 111.804   6
   8  -2   9 2705.38 306.967   6
   8  -2  10 6852.60 486.931   6
   8  -2  11 4871.18 425.045   6
   8  -2  12 1204.80 252.579   6
   8  -2  13 1932.34 307.523   6
   8  -2  14 3230.85 386.717   6
   8  -2  15 3102.10 391.111   6
   8  -1  -4 1880.30 156.790   5
   8  -1  -3 9.07631 67.0582   6
   8  -1  -3-47.2028 89.4010   5
   8  -1  -2 1566.54 150.172   5
   8  -1  -2 1612.78 143.955   6
   8  -1  -1 2327.12 191.749   6
   8  -1  -1 2214.13 187.722   5
   8  -1   0 3621.59 238.066   6
   8  -1   0 3085.62 217.419   5
   8  -1   1 892.320 136.222   6
   8  -1   1 579.101 97.3538   5
   8  -1   2 36.1770 110.093   6
   8  -1   3 6066.44 350.046   6
   8  -1   4 10476.7 484.692   6
   8  -1   5 4097.53 312.129   6
   8  -1   6 117.433 105.297   6
   8  -1   7 6908.78 440.900   6
   8  -1   8 10422.8 568.309   6
   8  -1   9 7342.82 491.145   6
   8  -1  10 238.843 143.553   6
   8  -1  11 2319.74 322.130   6
   8  -1  12 6613.38 526.559   6
   8  -1  13 8944.13 618.407   6
   8  -1  14 2212.68 349.577   6
   8  -1  15-135.207 190.941   6
   8   0  -3 2312.56 159.957   5
   8   0  -3 2339.11 177.125   6
   8   0  -2 3952.32 237.823   6
   8   0  -2 3521.24 212.066   5
   8   0  -1-42.5592 65.1183   5
   8   0  -1-61.0370 83.6998   6
   8   0   0 1295.79 164.602   6
   8   0   0 1253.01 150.782   5
   8   0   1 7064.60 358.768   6
   8   0   2 4076.64 278.650   6
   8   0   3 191.628 122.086   6
   8   0   4 3307.89 279.228   6
   8   0   5 12369.3 549.553   6
   8   0   6 13889.0 601.875   6
   8   0   7 2063.91 251.272   6
   8   0   8 433.891 175.279   6
   8   0   9 5503.16 425.842   6
   8   0  10 10163.6 601.517   6
   8   0  11 6420.95 514.419   6
   8   0  12 647.588 221.551   6
   8   0  13 851.863 242.834   6
   8   0  14 5892.19 544.050   6
   8   0  15 5226.23 514.038   6
   8   1  -3 770.345 93.8306   5
   8   1  -2 5336.61 255.109   5
   8   1  -1 9012.53 339.454   5
   8   1   3 13036.7 534.860   6
   8   1   4 10606.2 497.336   6
   8   1   5 966.162 165.029   6
   8   1   6 619.841 161.732   6
   8   1   7 4948.16 386.116   6
   8   1   8 7221.28 477.525   6
   8   1   9 3643.30 364.383   6
   8   1  10-194.579 163.680   6
   8   1  11 4010.86 417.266   6
   8   1  12 6761.10 541.617   6
   8   1  13 2720.87 373.354   6
   8   1  14 424.591 231.278   6
   8   1  15-179.199 217.887   6
   8   1  16 2525.85 386.334   6
   8   2  -2 2195.62 146.833   5
   8   2  -1 393.264 81.3597   5
   8   2   6 7139.59 454.724   6
   8   2   7 3157.10 320.572   6
   8   2   8-123.323 156.534   6
   8   2   9 2666.77 326.701   6
   8   2  10 4324.62 413.041   6
   8   2  11 743.868 215.298   6
   8   2  12-279.828 235.548   6
   8   2  13 565.241 216.432   6
   8   2  14 1961.02 334.928   6
   8   2  15 1442.60 299.297   6
   8   2  16 340.580 221.447   6
   8   3  -2 5000.03 201.551   5
   8   3   7 1604.29 239.224   6
   8   3   8 1336.54 217.980   6
   8   3   9 495.530 169.830   6
   8   3  10-190.067 214.280   6
   8   3  11 2176.93 324.665   6
   8   3  12 2859.69 367.843   6
   8   3  13 1005.84 264.104   6
   8   3  14 119.640 173.678   6
   8   3  15 2468.10 379.313   6
   8   4   9 8394.90 574.428   6
   8   4  10 6628.38 526.798   6
   8   4  11 1618.92 271.358   6
   8   4  12 1566.51 299.768   6
   8   4  13 2369.66 360.235   6
   8   4  14 2289.00 374.035   6
   8   4  15 203.640 187.123   6
   8   5  10 2128.20 312.033   6
   8   5  11 4166.45 453.025   6
   8   5  12 4313.83 470.730   6
   8   5  13 74.9270 198.490   6
   8   5  14 1392.58 303.593   6
   8   5  15 3350.71 426.976   6
   8   6  11 223.512 180.217   6
   8   6  12 2807.98 400.558   6
   8   6  13 5575.86 538.108   6
   8   6  14 2441.24 374.094   6
   8   6  15-283.666 245.779   6
   8   7  12 2257.82 356.717   6
   8   7  13 282.470 175.166   6
   8   7  14 4197.88 503.674   6
   8   8  13 5711.37 538.625   6
   8   8  14 1785.20 327.110   6
   9 -10  -3 80.4413 141.261   5
   9 -10  -2 743.520 228.435   5
   9 -10  -1 231.046 168.539   5
   9 -10   0 1036.18 239.636   5
   9 -10   1 270.932 194.500   5
   9 -10   2 665.514 216.358   5
   9 -10   3 473.662 177.414   5
   9 -10   4 76.3995 151.178   5
   9  -9  -3 686.649 212.672   5
   9  -9  -2 407.490 178.976   5
   9  -9  -1 243.284 181.318   5
   9  -9   0 369.378 174.251   5
   9  -9   1 2861.20 338.708   5
   9  -9   2 1277.63 249.647   5
   9  -9   3 219.826 166.753   5
   9  -9   4 853.444 232.529   5
   9  -9   5 1042.43 235.637   5
   9  -9   6 762.071 220.984   5
   9  -9   7 105.284 157.099   5
   9  -9   8 270.250 152.931   6
   9  -9   9 1267.42 259.673   6
   9  -9  10 1255.06 270.445   6
   9  -8  -3 286.251 143.528   5
   9  -8  -2 766.286 197.903   5
   9  -8  -1 559.706 165.366   5
   9  -8   0-54.0403 134.926   5
   9  -8   1-65.0026 129.889   5
   9  -8   2 841.180 213.785   5
   9  -8   3 1202.93 243.387   5
   9  -8   4 156.231 152.180   5
   9  -8   5 109.268 153.860   5
   9  -8   6 3161.42 384.099   5
   9  -8   6 2838.36 301.698   6
   9  -8   7 3534.24 412.388   5
   9  -8   7 3026.65 330.987   6
   9  -8   8 2204.08 299.334   6
   9  -8   8 2146.87 317.484   5
   9  -8   9 153.363 172.009   6
   9  -8  10 1147.98 253.660   6
   9  -8  11 1954.44 318.803   6
   9  -7  -3 392.133 146.397   5
   9  -7  -2 36.6500 121.037   5
   9  -7  -1 643.388 176.106   5
   9  -7   0 1964.28 271.716   5
   9  -7   1 1264.20 215.765   5
   9  -7   2 43.0069 124.437   5
   9  -7   3 892.904 210.341   5
   9  -7   4 2552.58 313.497   5
   9  -7   5 1989.21 235.379   6
   9  -7   5 1883.78 277.031   5
   9  -7   6 409.064 140.810   6
   9  -7   6-7.99233 185.284   5
   9  -7   7 265.915 139.248   6
   9  -7   7 145.032 142.543   5
   9  -7   8 1324.50 226.427   6
   9  -7   8 1435.77 282.185   5
   9  -7   9 2704.20 337.085   6
   9  -7   9 3205.36 400.582   5
   9  -7  10 2727.74 337.909   6
   9  -7  10 2363.99 338.663   5
   9  -7  11-92.6800 155.048   6
   9  -6  -3 1681.65 232.999   5
   9  -6  -2 1505.19 224.800   5
   9  -6  -1 439.246 163.362   5
   9  -6   0 203.917 109.245   5
   9  -6   1 1904.77 252.182   5
   9  -6   2 2991.17 310.840   5
   9  -6   3 2069.90 272.313   5
   9  -6   4 64.9939 127.228   5
   9  -6   4 213.433 104.631   6
   9  -6   5 421.326 135.447   6
   9  -6   5 91.4884 155.258   5
   9  -6   6 2010.83 296.009   5
   9  -6   6 2227.01 266.984   6
   9  -6   7 2604.50 336.964   5
   9  -6   7 2887.74 297.885   6
   9  -6   8 421.519 141.545   5
   9  -6   8 592.390 165.929   6
   9  -6   9-5.77334 167.281   6
   9  -6  10 1018.95 230.974   6
   9  -6  11 3738.93 401.759   6
   9  -6  12 613.450 218.644   6
   9  -5  -3 385.096 146.245   5
   9  -5  -2-29.6612 103.525   5
   9  -5  -1 1644.31 225.664   5
   9  -5   0 1856.70 230.177   5
   9  -5   1 444.606 144.614   5
   9  -5   2-80.0409 130.085   5
   9  -5   3 1493.63 236.779   5
   9  -5   3 1770.79 202.984   6
   9  -5   4 3288.58 276.928   6
   9  -5   4 3280.71 334.795   5
   9  -5   5 2210.10 235.850   6
   9  -5   5 1879.87 261.352   5
   9  -5   6 473.444 145.999   5
   9  -5   6 359.520 124.505   6
   9  -5   7-55.0082 150.290   6
   9  -5   8 817.573 184.799   6
   9  -5   9 1981.90 280.999   6
   9  -5  10 793.747 217.973   6
   9  -5  11 200.863 160.350   6
   9  -5  12 2032.81 310.825   6
   9  -5  13 1085.74 250.305   6
   9  -4  -2 3280.82 291.541   5
   9  -4  -1 1749.98 213.718   5
   9  -4   0 148.374 121.845   5
   9  -4   1 1975.34 241.828   5
   9  -4   2 3646.29 267.389   6
   9  -4   2 3372.32 307.609   5
   9  -4   3 3365.86 274.784   6
   9  -4   3 2051.00 252.118   5
   9  -4   4 682.370 175.499   6
   9  -4   4-9.03431 135.186   5
   9  -4   5 1050.50 196.527   5
   9  -4   5 1474.41 211.265   6
   9  -4   6 2706.75 289.807   6
   9  -4   7 1724.14 252.359   6
   9  -4   8 690.367 191.928   6
   9  -4   9 91.7244 130.642   6
   9  -4  10 1980.36 289.151   6
   9  -4  11 2195.73 312.801   6
   9  -4  12 1901.60 319.486   6
   9  -4  13-167.336 188.319   6
   9  -3  -2 572.208 150.540   5
   9  -3  -1 2337.11 241.500   5
   9  -3   0 4852.67 340.264   5
   9  -3   1 2105.58 229.128   5
   9  -3   1 2080.39 187.411   6
   9  -3   2-46.1820 83.4247   6
   9  -3   2-106.098 129.006   5
   9  -3   3 1686.47 204.513   6
   9  -3   3 1498.84 221.290   5
   9  -3   4 2961.00 269.117   6
   9  -3   5 3154.86 290.306   6
   9  -3   6 130.167 119.810   6
   9  -3   7 309.576 142.555   6
   9  -3   8 994.614 200.337   6
   9  -3   9 1761.77 265.252   6
   9  -3  10 511.692 149.311   6
   9  -3  11 256.405 157.024   6
   9  -3  12 1463.56 269.361   6
   9  -3  13 2557.70 354.621   6
   9  -2  -2 2384.22 227.873   5
   9  -2  -1 402.051 121.645   5
   9  -2   0 22.1362 89.8746   5
   9  -2   1 1011.46 143.802   5
   9  -2   1 1014.09 144.452   6
   9  -2   2 1679.88 184.474   6
   9  -2   2 1594.57 200.328   5
   9  -2   3 762.985 137.205   6
   9  -2   4 71.2856 95.1780   6
   9  -2   5 591.754 153.238   6
   9  -2   6 3213.41 314.014   6
   9  -2   7 1003.01 197.295   6
   9  -2   8-83.3515 147.393   6
   9  -2   9 1094.96 217.543   6
   9  -2  10 2872.56 356.025   6
   9  -2  11 2504.34 336.197   6
   9  -2  12 125.636 154.020   6
   9  -2  13 802.007 225.688   6
   9  -2  14 2056.80 336.017   6
   9  -1  -1 1699.79 179.201   5
   9  -1   0 2159.77 195.701   5
   9  -1   0 2194.22 205.521   6
   9  -1   1 692.127 131.203   6
   9  -1   1 481.850 97.7630   5
   9  -1   2-40.3372 120.100   6
   9  -1   2-37.6601 128.806   5
   9  -1   3 2834.84 255.767   6
   9  -1   4 4562.86 331.532   6
   9  -1   5 909.286 182.021   6
   9  -1   6 152.886 118.438   6
   9  -1   7 5215.81 408.057   6
   9  -1   8 5428.39 425.798   6
   9  -1   9 1157.90 222.983   6
   9  -1  10 312.276 161.703   6
   9  -1  11 2344.02 320.060   6
   9  -1  12 4674.20 468.458   6
   9  -1  13 4103.61 453.142   6
   9  -1  14 732.853 219.534   6
   9   0  -1 180.242 91.7223   5
   9   0  -1-29.5722 109.793   6
   9   0   0 1038.72 144.338   6
   9   0   0 1089.04 148.939   5
   9   0   1 1769.19 201.203   6
   9   0   1 1741.08 182.702   5
   9   0   2 480.163 102.977   6
   9   0   3-36.7174 114.955   6
   9   0   4 1784.53 214.465   6
   9   0   5 3464.46 308.256   6
   9   0   6 2387.31 271.991   6
   9   0   7 609.174 151.887   6
   9   0   8 305.548 152.762   6
   9   0   9 2458.70 316.609   6
   9   0  10 4441.01 427.388   6
   9   0  11 533.316 169.276   6
   9   0  12 331.153 213.884   6
   9   0  13 4148.91 463.729   6
   9   0  14 4458.29 484.552   6
   9   1  -1 3816.38 268.848   6
   9   1  -1 3328.48 230.350   5
   9   1   0 799.526 148.591   6
   9   1   0 853.332 144.841   5
   9   1   1 57.3081 93.9892   6
   9   1   2 1952.31 204.121   6
   9   1   3 4294.88 314.178   6
   9   1   4 1394.47 192.856   6
   9   1   5-126.054 157.608   6
   9   1   6 1128.10 210.718   6
   9   1   7 3362.80 329.990   6
   9   1   8 2829.64 324.322   6
   9   1   9 177.016 151.174   6
   9   1  10 146.482 148.245   6
   9   1  11 3196.26 379.980   6
   9   1  12 1854.30 325.983   6
   9   1  13 689.477 219.442   6
   9   1  14-263.671 217.899   6
   9   2   0 4810.11 281.744   5
   9   2   4 2914.56 283.741   6
   9   2   5 4892.94 379.419   6
   9   2   6 2491.86 283.504   6
   9   2   7-198.227 143.447   6
   9   2   8 3346.15 359.946   6
   9   2   9 8184.13 560.138   6
   9   2  10 7158.40 538.377   6
   9   2  11 1209.23 273.645   6
   9   2  12 735.402 247.179   6
   9   2  13 4314.79 465.591   6
   9   2  14 4769.24 510.319   6
   9   3   6 4570.97 390.560   6
   9   3   7 5179.66 422.727   6
   9   3   8 848.817 188.998   6
   9   3   9-186.141 223.756   6
   9   3  10 630.943 203.995   6
   9   3  11 3402.33 394.219   6
   9   3  12 3666.95 423.143   6
   9   3  13 371.739 195.429   6
   9   3  14 193.212 191.199   6
   9   4   8 8740.29 570.236   6
   9   4   9 11826.3 691.544   6
   9   4  10 6075.35 524.110   6
   9   4  11 1122.71 234.828   6
   9   4  12 1216.58 531.982   6
   9   4  13 2982.90 413.255   6
   9   4  14 1203.49 293.972   6
   9   5   9 42.2952 193.883   6
   9   5  10 2340.50 331.274   6
   9   5  11 2509.71 365.101   6
   9   5  12 1898.58 340.975   6
   9   5  13-270.989 219.873   6
   9   6  10 239.286 188.246   6
   9   6  11 518.017 270.308   6
   9   6  12 1533.23 323.488   6
   9   6  13 2261.20 377.034   6
   9   7  11 1898.97 328.719   6
   9   7  12-345.329 209.478   6
   9   8  12 2382.40 375.736   6
  10  -9   1 1526.85 305.177   5
  10  -8   0-71.2640 171.435   5
  10  -8   1-2.61096 140.320   5
  10  -8   2 277.884 173.426   5
  10  -8   3 690.365 221.099   5
  10  -8   4 169.215 143.693   5
  10  -7   0 897.286 215.679   5
  10  -7   1 231.694 167.201   5
  10  -7   2 54.4208 154.898   5
  10  -7   3 296.248 156.951   5
  10  -7   4 669.511 215.860   5
  10  -7   5 551.695 197.574   5
  10  -7   6-115.784 176.637   5
  10  -7   9 827.210 221.977   6
  10  -7  10 123.691 160.582   6
  10  -6   0 161.647 147.331   5
  10  -6   1 952.992 214.965   5
  10  -6   2 778.481 201.462   5
  10  -6   3 214.570 166.344   5
  10  -6   4-158.596 176.690   5
  10  -6   5 839.477 183.961   5
  10  -6   6 1757.28 301.831   5
  10  -6   7 889.290 240.055   5
  10  -6   7 1230.96 222.030   6
  10  -6   8-1.41589 163.050   5
  10  -6   8 57.8484 146.734   6
  10  -6   9 286.002 161.096   6
  10  -6  10 2076.02 298.322   6
  10  -5   0 1253.08 220.499   5
  10  -5   1 409.231 168.544   5
  10  -5   2 274.614 157.598   5
  10  -5   3 1651.87 255.702   5
  10  -5   4 1667.87 285.843   5
  10  -5   5 951.325 217.405   5
  10  -5   6-202.448 171.178   6
  10  -5   6-88.4841 193.710   5
  10  -5   7 876.598 241.983   5
  10  -5   7 715.705 179.125   6
  10  -5   8 1783.41 301.665   5
  10  -5   8 1355.23 248.007   6
  10  -5   9 991.092 238.433   6
  10  -5  10 75.4155 153.240   6
  10  -5  11 159.046 167.724   6
  10  -4   0 775.172 199.801   5
  10  -4   1 1705.20 240.010   5
  10  -4   2 1822.46 259.172   5
  10  -4   3 343.506 128.949   5
  10  -4   4 193.478 126.325   5
  10  -4   5 2405.00 280.082   6
  10  -4   5 1922.58 291.495   5
  10  -4   6 3740.79 345.564   6
  10  -4   6 3455.94 384.909   5
  10  -4   7 1771.39 263.811   6
  10  -4   8 217.195 151.858   6
  10  -4   9 1758.75 280.153   6
  10  -4  10 3160.74 364.243   6
  10  -4  11 1834.20 300.740   6
  10  -3   1 88.6477 111.118   5
  10  -3   2 285.962 112.110   5
  10  -3   3 1925.55 256.414   5
  10  -3   4 3320.69 301.754   6
  10  -3   4 2631.20 295.942   5
  10  -3   5 1545.91 228.813   6
  10  -3   5 826.915 187.335   5
  10  -3   6 229.115 138.038   6
  10  -3   7 2348.49 296.521   6
  10  -3   8 3447.58 353.486   6
  10  -3   9 2042.08 289.145   6
  10  -3  10-18.1008 145.493   6
  10  -3  11 708.811 196.131   6
  10  -3  12 1872.43 320.235   6
  10  -2   1 2175.91 243.695   5
  10  -2   2 1242.99 185.261   5
  10  -2   3-283.220 118.387   6
  10  -2   3-58.7617 136.866   5
  10  -2   4 928.905 177.641   6
  10  -2   4 573.369 140.917   5
  10  -2   5 3863.04 334.776   6
  10  -2   6 3782.44 340.038   6
  10  -2   7 876.355 206.492   6
  10  -2   8 102.762 143.826   6
  10  -2   9 1336.87 244.289   6
  10  -2  10 2644.61 338.086   6
  10  -2  11 680.001 214.557   6
  10  -2  12 107.622 151.362   6
  10  -1   1-186.431 145.813   5
  10  -1   2 270.008 100.183   6
  10  -1   2 526.310 119.495   5
  10  -1   3 2603.04 250.667   6
  10  -1   3 2309.10 248.987   5
  10  -1   4 2341.05 248.645   6
  10  -1   5 411.520 135.866   6
  10  -1   6 0.33229 139.832   6
  10  -1   7 1562.86 243.750   6
  10  -1   8 951.068 207.894   6
  10  -1   9 301.455 184.921   6
  10  -1  10-50.8349 151.797   6
  10  -1  11 1021.15 246.436   6
  10  -1  12 1704.87 299.895   6
  10   0   2 767.262 129.127   6
  10   0   2 1012.01 142.955   5
  10   0   3-325.184 182.047   6
  10   0   4 584.171 128.569   6
  10   0   5 2377.24 267.988   6
  10   0   6 1243.72 212.943   6
  10   0   7 65.5167 124.331   6
  10   0   8-1.90155 160.371   6
  10   0   9 623.634 198.701   6
  10   0  10 1489.99 279.590   6
  10   0  11 135.160 165.000   6
  10   0  12-158.668 192.375   6
  10   1   1-211.395 142.549   6
  10   1   2 175.301 97.0607   6
  10   1   3 970.649 155.410   6
  10   1   4 803.010 147.274   6
  10   1   5 61.6921 121.158   6
  10   1   6 763.553 183.895   6
  10   1   7 867.105 206.608   6
  10   1   8 150.429 157.769   6
  10   1   9-61.7515 160.109   6
  10   1  10-200.996 163.174   6
  10   1  11 1700.29 300.832   6
  10   1  12 664.550 223.748   6
  10   2   0 3278.27 281.568   6
  10   2   1 1833.12 210.680   6
  10   2   2 140.649 136.367   6
  10   2   3-156.665 158.964   6
  10   2   4 1155.00 187.089   6
  10   2   5 2489.39 283.975   6
  10   2   6 48.3175 139.086   6
  10   2   7 104.202 133.338   6
  10   2   8 2509.21 320.170   6
  10   2   9 4413.29 419.179   6
  10   2  10 2450.98 338.040   6
  10   2  11 513.830 208.934   6
  10   2  12 937.571 253.832   6
  10   3   4 89.7377 123.585   6
  10   3   5 1491.35 236.679   6
  10   3   6 4681.02 403.596   6
  10   3   7 2324.05 306.409   6
  10   3   8-157.429 171.656   6
  10   3   9 275.930 172.309   6
  10   3  10 3043.61 364.243   6
  10   3  11 3168.99 389.799   6
  10   3  12 2033.10 339.723   6
  10   4   6-142.495 145.393   6
  10   4   7 1829.54 274.030   6
  10   4   8 4952.33 444.760   6
  10   4   9 4670.47 444.327   6
  10   4  10 602.201 184.778   6
  10   4  11 278.855 204.774   6
  10   4  12 2554.39 401.724   6
  10   5   8-166.613 161.355   6
  10   5   9 776.476 218.144   6
  10   5  10 2591.99 370.109   6
  10   5  11 3195.38 400.348   6
  10   6   9 2216.58 330.940   6
  10   6  10-321.841 212.760   6
  10   6  11 383.816 219.622   6
  10   7  10 1284.42 268.274   6
  11  -6   3 562.079 213.186   5
  11  -6   4-101.568 183.892   5
  11  -5   3 398.871 189.164   5
  11  -5   4 700.763 231.383   5
  11  -5   5 400.788 171.261   5
  11  -5   6 48.6459 166.665   5
  11  -4   3-95.8913 143.239   5
  11  -4   4 728.229 200.857   5
  11  -4   5 678.221 213.853   5
  11  -4   6 1303.80 291.757   5
  11  -4   7 476.464 206.414   5
  11  -3   4 755.323 202.363   5
  11  -3   5 165.694 147.587   5
  11  -3   6 561.539 207.666   5
  11  -3   8 2265.47 316.176   6
  11  -3   9 220.246 170.342   6
  11  -2   4 1741.72 263.209   5
  11  -2   5 2181.49 296.419   5
  11  -2   7 39.5620 144.395   6
  11  -2   8 410.849 164.621   6
  11  -2   9 1304.93 244.240   6
  11  -2  10 1412.02 278.822   6
  11  -1   4 401.389 155.587   5
  11  -1   6 602.854 166.594   6
  11  -1   7 1225.05 239.890   6
  11  -1   8 928.482 196.726   6
  11  -1   9 182.903 159.659   6
  11  -1  10-218.784 184.082   6
  11   0   5 1237.30 219.053   6
  11   0   6 400.451 136.391   6
  11   0   7-62.8709 164.209   6
  11   0   8 297.518 157.149   6
  11   0   9 1663.51 289.931   6
  11   0  10 1468.59 282.447   6
  11   1   4 706.514 152.621   6
  11   1   5-96.4855 145.813   6
  11   1   6 1242.17 239.134   6
  11   1   7 1740.13 269.930   6
  11   1   8 25.8843 135.045   6
  11   1   9-140.276 169.131   6
  11   1  10 600.171 189.359   6
  11   2   3 471.238 142.444   6
  11   2   4 926.795 195.533   6
  11   2   5 2430.69 288.338   6
  11   2   6 590.228 172.301   6
  11   2   7 244.311 144.472   6
  11   2   8 1519.86 263.194   6
  11   2   9 2665.50 358.913   6
  11   2  10 1453.98 299.434   6
  11   3   2 902.797 166.939   6
  11   3   3 540.275 137.593   6
  11   3   4-267.234 138.579   6
  11   3   5-89.5834 157.685   6
  11   3   6 805.555 214.991   6
  11   3   7 863.156 207.071   6
  11   3   8 135.180 140.873   6
  11   3   9 618.569 207.458   6
  11   4   4 795.845 178.492   6
  11   4   5 957.428 180.293   6
  11   4   6 98.3037 136.951   6
  11   4   7 707.553 199.633   6
  11   4   8 1780.01 283.727   6
  11   4   9 966.426 244.340   6
  11   5   6 1852.55 265.266   6
  11   5   7 766.980 192.261   6
  11   5   8-233.036 193.335   6
  11   6   8 2273.37 328.210   6
  12   4   6-266.759 172.687   6
  12   5   5 856.533 209.538   6
 -11  -8   1 1201.83 237.174   3
 -11  -8   2 1005.35 227.304   3
 -11  -7   1 496.107 192.053   3
 -11  -7   2-161.658 177.189   3
 -11  -7   3 897.117 190.266   3
 -11  -6   1 901.997 222.983   3
 -11  -6   2 1196.33 236.549   3
 -11  -6   3 119.469 153.376   3
 -11  -5   1 484.401 135.827   3
 -11  -5   2 668.884 161.182   3
 -10 -12  -2 1296.89 238.986   3
 -10 -12  -1 199.494 126.227   3
 -10 -12   0 844.273 233.140   3
 -10 -11  -2 703.625 185.511   3
 -10 -11  -1 1945.00 290.706   3
 -10 -11   0 2334.32 321.764   3
 -10 -11   1 902.226 258.747   3
 -10 -11   2-140.192 150.865   3
 -10 -10  -2 1622.56 243.291   3
 -10 -10  -1 29.9267 101.905   3
 -10 -10   0 949.988 192.836   3
 -10 -10   1 3323.55 383.495   3
 -10 -10   2 1740.24 307.718   3
 -10 -10   3-450.649 171.739   3
 -10  -9  -2 644.106 166.553   3
 -10  -9  -1 1777.71 264.914   3
 -10  -9   0 639.054 162.896   3
 -10  -9   1 282.113 124.202   3
 -10  -9   2 487.627 133.942   3
 -10  -9   3 2280.33 347.044   3
 -10  -9   4 2162.33 355.092   3
 -10  -8  -2 733.444 165.995   3
 -10  -8  -1 30.3537 89.2581   3
 -10  -8   0 2628.35 328.014   3
 -10  -8   1 3705.19 391.557   3
 -10  -8   2 3742.99 403.034   3
 -10  -8   3 313.692 156.595   3
 -10  -8   4 759.560 221.943   3
 -10  -8   5 2722.69 393.957   3
 -10  -7  -2 3523.05 335.023   3
 -10  -7  -1 4297.03 395.102   3
 -10  -7   0 984.175 199.423   3
 -10  -7   1 293.795 143.607   3
 -10  -7   2 1961.04 288.811   3
 -10  -7   3 4504.60 449.864   3
 -10  -7   4 2184.72 319.927   3
 -10  -7   5 336.418 180.122   3
 -10  -6  -2 1084.64 194.188   3
 -10  -6  -1 337.060 89.5742   3
 -10  -6   0 3713.90 371.684   3
 -10  -6   1 3188.11 364.673   3
 -10  -6   2 1133.94 236.133   3
 -10  -6   3-266.597 172.126   3
 -10  -6   4 880.492 199.137   3
 -10  -6   5 1514.47 263.104   3
 -10  -6   6 827.886 188.109   3
 -10  -5  -2 4371.45 363.133   3
 -10  -5  -1 2609.03 292.319   3
 -10  -5   0 288.242 98.7599   3
 -10  -5   1 517.423 125.007   3
 -10  -5   2 1843.05 257.464   3
 -10  -5   3 1967.22 290.112   3
 -10  -5   4 229.237 108.389   3
 -10  -5   5 207.050 105.202   3
 -10  -5   6 461.145 137.166   3
 -10  -4  -2 301.894 77.8031   3
 -10  -4  -1 392.610 112.680   3
 -10  -4   0 2607.86 290.416   3
 -10  -4   1 1739.88 234.292   3
 -10  -4   2-314.436 182.807   3
 -10  -4   3 906.508 204.117   3
 -10  -4   4 1897.26 287.147   3
 -10  -4   5 627.600 146.951   3
  -9 -14  -4 423.954 142.776   3
  -9 -14  -3 2817.99 330.776   3
  -9 -14  -2 2708.15 336.682   3
  -9 -14  -1 309.022 164.034   3
  -9 -14   0-429.407 213.989   3
  -9 -13  -4 2873.76 341.973   3
  -9 -13  -3 48.1814 97.1812   3
  -9 -13  -2 2487.23 333.190   3
  -9 -13  -1 7385.85 554.848   3
  -9 -13   0 6499.80 538.707   3
  -9 -13   1 1218.79 246.041   3
  -9 -13   2 217.136 100.226   3
  -9 -12  -5-50.4826 136.577   3
  -9 -12  -4 1954.20 253.012   3
  -9 -12  -3 4220.88 398.833   3
  -9 -12  -2 3847.73 377.912   3
  -9 -12  -1 469.460 135.296   3
  -9 -12   0 576.235 177.941   3
  -9 -12   1 3625.98 398.400   3
  -9 -12   2 5401.06 493.861   3
  -9 -12   3 1612.80 273.005   3
  -9 -11  -5 5618.09 412.049   3
  -9 -11  -4 2724.55 306.485   3
  -9 -11  -3 282.494 100.998   3
  -9 -11  -2 654.315 149.606   3
  -9 -11  -1 3547.77 370.351   3
  -9 -11   0 3231.22 353.894   3
  -9 -11   1 636.236 181.736   3
  -9 -11   2 228.016 102.938   3
  -9 -11   3 1949.96 286.643   3
  -9 -11   4 1448.22 279.513   3
  -9 -10  -5-68.9570 112.715   3
  -9 -10  -4 2178.99 251.837   3
  -9 -10  -3 4046.72 347.928   3
  -9 -10  -2 2228.30 282.285   3
  -9 -10  -1-163.265 137.145   3
  -9 -10   0 1378.10 231.429   3
  -9 -10   1 2630.27 331.890   3
  -9 -10   2 1452.18 261.176   3
  -9 -10   3-102.883 114.451   3
  -9 -10   4 992.169 230.727   3
  -9 -10   5 2901.72 395.487   3
  -9  -9  -5 3385.99 302.058   3
  -9  -9  -4 782.102 160.372   3
  -9  -9  -3 131.978 63.5141   3
  -9  -9  -2 2737.36 289.515   3
  -9  -9  -1 3482.53 345.215   3
  -9  -9   0 611.940 160.186   3
  -9  -9   1-178.213 136.722   3
  -9  -9   2 1085.55 215.675   3
  -9  -9   3 2494.33 330.614   3
  -9  -9   4 1748.22 304.832   3
  -9  -9   5-189.113 181.846   3
  -9  -9   6 745.616 223.898   3
  -9  -8  -5 835.732 154.415   3
  -9  -8  -4 2917.20 276.548   3
  -9  -8  -3 1604.69 214.136   3
  -9  -8  -2 44.2528 89.4306   3
  -9  -8  -1 1557.15 213.592   3
  -9  -8   0 4175.60 386.454   3
  -9  -8   1 2344.24 294.440   3
  -9  -8   2 857.597 180.687   3
  -9  -8   3 96.0594 91.7236   3
  -9  -8   4 1126.91 230.715   3
  -9  -8   5 3301.63 400.265   3
  -9  -8   6 1602.48 314.673   3
  -9  -8   7-301.192 171.403   3
  -9  -7  -5 793.261 147.111   3
  -9  -7  -4 61.1510 70.0038   3
  -9  -7  -3 702.321 133.624   3
  -9  -7  -2 4292.64 348.245   3
  -9  -7  -1 4663.17 387.236   3
  -9  -7   0 96.6594 96.1669   3
  -9  -7   1 3773.65 359.032   3
  -9  -7   2 4061.45 399.273   3
  -9  -7   3 2930.55 337.043   3
  -9  -7   4 335.344 132.388   3
  -9  -7   5-132.079 176.997   3
  -9  -7   6 2004.02 322.149   3
  -9  -7   7 3246.30 418.089   3
  -9  -6  -5 5492.91 339.083   3
  -9  -6  -4 5464.90 356.292   3
  -9  -6  -3 508.509 130.214   3
  -9  -6  -2 1113.06 185.030   3
  -9  -6  -1 5160.78 385.839   3
  -9  -6   0 5912.60 434.712   3
  -9  -6   1 1304.21 217.764   3
  -9  -6   2 178.839 83.4026   3
  -9  -6   3 681.603 167.403   3
  -9  -6   4 4289.11 440.039   3
  -9  -6   5 5729.55 524.264   3
  -9  -6   6 868.346 181.129   3
  -9  -6   7-259.880 187.345   3
  -9  -6   8 1239.99 230.159   3
  -9  -5  -5-3.54317 63.6314   3
  -9  -5  -4 1209.96 162.319   3
  -9  -5  -3 3392.74 284.452   3
  -9  -5  -2 3529.10 312.851   3
  -9  -5  -1 3786.98 337.716   3
  -9  -5   0 115.369 81.3946   3
  -9  -5   1 1907.66 250.147   3
  -9  -5   2 3325.61 346.747   3
  -9  -5   3 695.442 147.963   3
  -9  -5   4-32.3399 144.656   3
  -9  -5   5 523.688 141.689   3
  -9  -5   6 3209.41 385.413   3
  -9  -5   7 2025.95 331.886   3
  -9  -5   8 517.082 205.746   3
  -9  -4  -5 9523.14 409.783   3
  -9  -4  -4 3950.65 285.166   3
  -9  -4  -3 2745.72 251.010   3
  -9  -4  -2 160.590 72.9139   3
  -9  -4  -1 3737.21 316.286   3
  -9  -4   0 7554.54 470.674   3
  -9  -4   1 4808.68 397.221   3
  -9  -4   2 181.104 102.161   3
  -9  -4   3 827.992 169.482   3
  -9  -4   4 3747.15 380.240   3
  -9  -4   5 4584.61 437.670   3
  -9  -4   6 1543.79 255.539   3
  -9  -4   7 487.125 154.275   3
  -9  -4   8 817.431 239.382   3
  -9  -3  -2 6666.26 404.040   3
  -9  -3  -1 1961.92 229.720   3
  -9  -3   0-115.634 146.486   3
  -9  -3   1 1292.50 205.344   3
  -9  -3   2 2636.44 295.311   3
  -9  -3   3 1288.94 223.986   3
  -9  -3   4-25.3771 116.912   3
  -9  -3   5 182.779 135.147   3
  -9  -3   6 1865.92 269.084   3
  -8 -16  -5 32.0487 143.152   3
  -8 -16  -4 130.900 114.325   3
  -8 -16  -3 1507.07 281.749   3
  -8 -15  -6 644.385 184.751   3
  -8 -15  -5 1301.05 235.661   3
  -8 -15  -4 2763.00 344.212   3
  -8 -15  -3 1222.73 234.290   3
  -8 -15  -2 328.978 138.167   3
  -8 -15  -1 4824.78 462.855   3
  -8 -15   0 3177.94 394.972   3
  -8 -14  -6 1855.29 273.885   3
  -8 -14  -5 266.327 127.315   3
  -8 -14  -4 2086.90 291.212   3
  -8 -14  -3 4031.91 409.536   3
  -8 -14  -2 1731.03 278.650   3
  -8 -14  -1 171.105 120.023   3
  -8 -14   0 3050.57 367.000   3
  -8 -14   1 5964.65 510.675   3
  -8 -14   2 4052.24 447.086   3
  -8 -13  -7 739.955 178.455   3
  -8 -13  -6 2238.74 274.909   3
  -8 -13  -5 2604.69 309.327   3
  -8 -13  -4 600.212 170.807   3
  -8 -13  -3 160.554 91.6470   3
  -8 -13  -2 2480.90 307.950   3
  -8 -13  -1 4584.40 428.037   3
  -8 -13   0 2951.51 351.144   3
  -8 -13   1 309.067 102.818   3
  -8 -13   2 124.721 146.088   3
  -8 -13   3 2849.48 346.391   3
  -8 -13   4 3258.26 399.607   3
  -8 -12  -7 4617.87 370.493   3
  -8 -12  -6 735.193 176.491   3
  -8 -12  -5 198.413 131.952   3
  -8 -12  -4 3899.24 361.032   3
  -8 -12  -3 4484.48 394.397   3
  -8 -12  -2 3610.65 362.079   3
  -8 -12  -1 76.1827 82.7545   3
  -8 -12   0 2495.41 309.786   3
  -8 -12   1 8175.13 576.081   3
  -8 -12   2 6511.20 525.197   3
  -8 -12   3 515.778 146.996   3
  -8 -12   4 1934.32 280.245   3
  -8 -12   5 5314.97 510.668   3
  -8 -11  -7 1150.15 190.649   3
  -8 -11  -6 4388.12 353.796   3
  -8 -11  -5 3881.68 334.380   3
  -8 -11  -4 2035.12 253.243   3
  -8 -11  -3 385.282 145.531   3
  -8 -11  -2 2970.95 312.314   3
  -8 -11  -1 6324.01 464.360   3
  -8 -11   0 1880.58 261.416   3
  -8 -11   1-8.65735 127.908   3
  -8 -11   2 1536.56 239.456   3
  -8 -11   3 3716.95 399.693   3
  -8 -11   4 5233.15 491.257   3
  -8 -11   5 651.410 208.196   3
  -8 -11   6 1412.46 269.069   3
  -8 -11   7 5281.29 532.340   3
  -8 -10  -7 3032.48 278.555   3
  -8 -10  -6 193.091 89.0298   3
  -8 -10  -5 1776.72 222.862   3
  -8 -10  -4 6172.40 411.831   3
  -8 -10  -3 7068.04 450.262   3
  -8 -10  -2 2199.46 272.662   3
  -8 -10  -1 263.587 82.3829   3
  -8 -10   0 5994.24 448.802   3
  -8 -10   1 7383.43 507.721   3
  -8 -10   2 7737.83 539.590   3
  -8 -10   3 858.224 178.752   3
  -8 -10   4 838.847 177.200   3
  -8 -10   5 6351.44 531.613   3
  -8 -10   6 2873.50 377.930   3
  -8 -10   7 305.517 114.567   3
  -8  -9  -7 3392.76 270.532   3
  -8  -9  -6 6250.16 377.110   3
  -8  -9  -5 7483.57 426.024   3
  -8  -9  -4 1839.66 231.340   3
  -8  -9  -3 820.090 135.376   3
  -8  -9  -2 7614.55 463.901   3
  -8  -9  -1 10229.0 552.914   3
  -8  -9   0 1566.10 226.254   3
  -8  -9   1 553.468 154.844   3
  -8  -9   2 3810.05 369.751   3
  -8  -9   3 8580.79 564.289   3
  -8  -9   4 3148.31 367.216   3
  -8  -9   5 33.5209 119.318   3
  -8  -9   6 1659.46 296.463   3
  -8  -9   7 2313.66 346.406   3
  -8  -9   8 2382.06 356.710   3
  -8  -8  -7 3355.90 253.401   3
  -8  -8  -6 599.513 122.128   3
  -8  -8  -5 2803.70 245.787   3
  -8  -8  -4 6871.49 401.649   3
  -8  -8  -3 4228.85 321.574   3
  -8  -8  -2 997.750 171.016   3
  -8  -8  -1 1511.94 216.054   3
  -8  -8   0 8234.01 497.106   3
  -8  -8   1 6062.55 437.331   3
  -8  -8   2 400.854 154.156   3
  -8  -8   3 190.352 97.4023   3
  -8  -8   4 3104.04 344.600   3
  -8  -8   5 2696.65 334.855   3
  -8  -8   6 777.482 229.070   3
  -8  -8   7 794.807 201.843   3
  -8  -8   8 2265.28 355.670   3
  -8  -8   9 3460.62 444.255   3
  -8  -7  -7 5011.01 286.952   3
  -8  -7  -6 8038.73 381.139   3
  -8  -7  -5 513.258 114.417   3
  -8  -7  -4 285.570 99.6628   3
  -8  -7  -3 6899.40 397.192   3
  -8  -7  -2 10029.2 497.809   3
  -8  -7  -1 4200.35 342.615   3
  -8  -7   0 126.371 73.0509   3
  -8  -7   1 4179.17 362.463   3
  -8  -7   2 5464.00 429.629   3
  -8  -7   3 2290.46 293.492   3
  -8  -7   4-52.7995 132.169   3
  -8  -7   5 1349.64 222.263   3
  -8  -7   6 4128.90 428.144   3
  -8  -7   7 2078.40 317.821   3
  -8  -7   8-60.6752 146.528   3
  -8  -7   9 222.821 116.049   3
  -8  -6  -7 1526.82 151.231   3
  -8  -6  -6 990.460 130.942   3
  -8  -6  -5 8097.21 381.574   3
  -8  -6  -4 880.201 140.721   3
  -8  -6  -3 710.483 127.857   3
  -8  -6  -2 0.22186 88.5249   3
  -8  -6  -1 1966.84 228.242   3
  -8  -6   0 3502.40 310.833   3
  -8  -6   1 2537.54 281.409   3
  -8  -6   2 287.646 94.4974   3
  -8  -6   3 5743.26 446.787   3
  -8  -6   4 8280.18 560.620   3
  -8  -6   5 1707.59 271.588   3
  -8  -6   6-100.886 132.642   3
  -8  -6   7 1573.59 286.585   3
  -8  -6   8 2927.65 361.673   3
  -8  -6   9 1061.69 247.935   3
  -8  -6  10-11.9319 163.501   3
  -8  -5  -7 2261.13 155.371   3
  -8  -5  -6 2988.18 209.604   3
  -8  -5  -5 708.486 107.739   3
  -8  -5  -4 2269.87 205.533   3
  -8  -5  -3 5717.68 347.268   3
  -8  -5  -2 8296.97 444.930   3
  -8  -5  -1 2933.20 278.930   3
  -8  -5   0 274.908 78.6250   3
  -8  -5   1 2241.02 262.677   3
  -8  -5   2 1710.46 238.824   3
  -8  -5   3-234.156 135.884   3
  -8  -5   4 758.408 147.643   3
  -8  -5   5 2490.20 314.104   3
  -8  -5   6 5439.54 482.452   3
  -8  -5   7 1853.21 301.249   3
  -8  -5   8 312.962 139.763   3
  -8  -5   9 693.028 194.753   3
  -8  -5  10 2487.07 370.829   3
  -8  -4  -7-1.00910 31.0740   3
  -8  -4  -6 1019.53 108.250   3
  -8  -4  -5 5044.82 280.212   3
  -8  -4  -4 2279.01 199.202   3
  -8  -4  -3 356.460 89.7830   3
  -8  -4  -2 4099.47 297.523   3
  -8  -4  -1 6995.52 419.867   3
  -8  -4   0 8225.56 475.327   3
  -8  -4   1 2874.91 290.500   3
  -8  -4   2 899.880 164.628   3
  -8  -4   3 8803.78 540.828   3
  -8  -4   4 9455.55 581.543   3
  -8  -4   5 3409.76 356.910   3
  -8  -4   6-8.03485 124.882   3
  -8  -4   7 5167.83 479.972   3
  -8  -4   8 4557.39 459.822   3
  -8  -4   9 3563.16 422.660   3
  -8  -4  10 88.2686 159.770   3
  -8  -3  -5-53.1237 60.7746   3
  -8  -3  -4 3969.91 250.240   3
  -8  -3  -3 7578.62 377.563   3
  -8  -3  -2 1987.23 209.102   3
  -8  -3  -1-44.5070 113.901   3
  -8  -3   0 2917.51 273.478   3
  -8  -3   1 8594.56 484.493   3
  -8  -3   2 5960.40 427.377   3
  -8  -3   3 275.424 84.5086   3
  -8  -3   4 773.027 142.183   3
  -8  -3   5 2778.09 295.011   3
  -8  -3   6 3718.48 379.125   3
  -8  -3   7 4411.62 448.240   3
  -8  -3   8-158.290 168.827   3
  -8  -3   9 797.471 199.542   3
  -8  -3  10 2559.95 369.662   3
  -8  -2  -2 3703.50 272.773   3
  -8  -2  -1 8343.72 441.641   3
  -8  -2   0 5848.96 385.513   3
  -8  -2   1 478.584 119.546   3
  -8  -2   2 2409.10 269.915   3
  -8  -2   3 7880.23 506.071   3
  -8  -2   4 5030.60 414.300   3
  -8  -2   5 1092.05 183.988   3
  -8  -2   6-203.056 153.547   3
  -8  -2   7 215.232 130.152   3
  -7 -16  -8 3357.27 384.776   3
  -7 -16  -7 5269.32 472.900   3
  -7 -16  -6 2069.85 305.014   3
  -7 -16  -5-205.813 158.227   3
  -7 -16  -4 676.283 175.260   3
  -7 -16  -3 5493.68 484.371   3
  -7 -16  -2 5063.05 477.391   3
  -7 -16  -1 431.159 158.268   3
  -7 -16   0 1164.74 249.744   3
  -7 -15  -8 556.647 164.864   3
  -7 -15  -7 118.241 90.4585   3
  -7 -15  -6 2667.07 325.330   3
  -7 -15  -5 8290.75 562.258   3
  -7 -15  -4 3755.58 391.473   3
  -7 -15  -3 270.385 121.244   3
  -7 -15  -2 4237.01 423.242   3
  -7 -15  -1 11503.9 701.910   3
  -7 -15   0 7622.81 580.954   3
  -7 -15   1 1565.03 286.357   3
  -7 -15   2 1244.46 256.335   3
  -7 -15   3 2426.12 341.694   3
  -7 -14  -9 755.207 165.545   3
  -7 -14  -8 6386.49 473.985   3
  -7 -14  -7 7034.59 491.913   3
  -7 -14  -6 1776.16 258.142   3
  -7 -14  -5 378.337 133.717   3
  -7 -14  -4 3867.39 378.134   3
  -7 -14  -3 3628.71 367.778   3
  -7 -14  -2 3280.39 359.645   3
  -7 -14  -1 42.9179 125.697   3
  -7 -14   0 2485.78 331.679   3
  -7 -14   1 4892.06 454.752   3
  -7 -14   2 4215.45 426.036   3
  -7 -14   3 682.312 197.866   3
  -7 -14   4-469.968 225.760   3
  -7 -14   5 3359.93 419.013   3
  -7 -13  -9 2260.67 264.085   3
  -7 -13  -8 926.416 177.183   3
  -7 -13  -7 170.013 106.989   3
  -7 -13  -6 3156.34 321.966   3
  -7 -13  -5 5148.63 407.891   3
  -7 -13  -4 1606.69 245.108   3
  -7 -13  -3-295.275 147.427   3
  -7 -13  -2 1518.13 239.167   3
  -7 -13  -1 3137.14 346.335   3
  -7 -13   0 1679.77 263.459   3
  -7 -13   1 167.977 127.969   3
  -7 -13   2 2535.21 316.893   3
  -7 -13   3 4633.55 442.003   3
  -7 -13   4 1904.22 315.864   3
  -7 -13   5-375.196 199.057   3
  -7 -13   6 1617.40 288.020   3
  -7 -12  -9 1929.51 233.338   3
  -7 -12  -8 3543.44 321.160   3
  -7 -12  -7 3235.57 306.301   3
  -7 -12  -6 183.016 88.4472   3
  -7 -12  -5 476.243 128.002   3
  -7 -12  -4 3560.08 333.133   3
  -7 -12  -3 3767.90 345.288   3
  -7 -12  -2 1402.36 237.516   3
  -7 -12  -1 398.050 147.622   3
  -7 -12   0 3810.81 369.299   3
  -7 -12   1 4898.99 430.450   3
  -7 -12   2 1565.80 263.455   3
  -7 -12   3 430.133 147.968   3
  -7 -12   4 3551.41 372.469   3
  -7 -12   5 5364.50 485.529   3
  -7 -12   6 3664.78 427.507   3
  -7 -12   7 279.218 168.623   3
  -7 -11  -9 1548.39 193.859   3
  -7 -11  -8-15.1027 94.2626   3
  -7 -11  -7 1532.82 195.169   3
  -7 -11  -6 3717.19 310.744   3
  -7 -11  -5 3006.69 285.486   3
  -7 -11  -4 160.777 97.6640   3
  -7 -11  -3 2079.85 253.562   3
  -7 -11  -2 6360.71 444.327   3
  -7 -11  -1 5650.05 418.684   3
  -7 -11   0 184.213 69.4610   3
  -7 -11   1 746.340 178.933   3
  -7 -11   2 4391.97 401.099   3
  -7 -11   3 5808.97 470.590   3
  -7 -11   4 2100.72 274.189   3
  -7 -11   5-180.632 132.356   3
  -7 -11   6 2055.57 311.631   3
  -7 -11   7 4305.66 456.464   3
  -7 -11   8 4613.04 486.490   3
  -7 -11   9-21.1396 154.206   3
  -7 -10  -9 2042.54 219.846   3
  -7 -10  -8 3500.39 273.655   3
  -7 -10  -7 1547.35 186.841   3
  -7 -10  -6 647.479 135.559   3
  -7 -10  -5 2113.98 233.565   3
  -7 -10  -4 8189.41 468.472   3
  -7 -10  -3 4130.07 341.117   3
  -7 -10  -2 380.790 107.103   3
  -7 -10  -1 6485.14 431.769   3
  -7 -10   0 12552.2 618.385   3
  -7 -10   1 5843.62 438.471   3
  -7 -10   2 1276.85 222.751   3
  -7 -10   3 601.687 157.804   3
  -7 -10   4 4733.06 428.132   3
  -7 -10   5 7173.58 535.999   3
  -7 -10   6 3022.87 356.033   3
  -7 -10   7 8.65416 126.551   3
  -7 -10   8 2725.81 370.928   3
  -7 -10   9 7263.05 606.362   3
  -7  -9  -9 553.164 101.778   3
  -7  -9  -8 1378.44 162.894   3
  -7  -9  -7 11068.8 475.270   3
  -7  -9  -6 13680.6 540.821   3
  -7  -9  -5 1301.97 182.154   3
  -7  -9  -4 48.5623 86.7015   3
  -7  -9  -3 4057.24 318.536   3
  -7  -9  -2 9603.09 499.673   3
  -7  -9  -1 10041.3 521.389   3
  -7  -9   0 849.372 119.450   3
  -7  -9   1 5927.31 422.773   3
  -7  -9   2 12924.6 645.857   3
  -7  -9   3 10501.3 595.307   3
  -7  -9   4 702.485 162.755   3
  -7  -9   5 96.3269 86.6850   3
  -7  -9   6 3347.28 379.977   3
  -7  -9   7 5318.24 480.080   3
  -7  -9   8 3053.20 397.176   3
  -7  -9   9 42.0489 124.606   3
  -7  -9  10 1190.38 252.378   3
  -7  -8  -9 6521.28 324.037   3
  -7  -8  -8 5427.97 301.218   3
  -7  -8  -7 690.120 119.276   3
  -7  -8  -6 3413.23 259.206   3
  -7  -8  -5 15731.8 559.386   3
  -7  -8  -4 15111.3 564.862   3
  -7  -8  -3 5155.25 347.357   3
  -7  -8  -2 1291.76 179.567   3
  -7  -8  -1 16399.0 640.691   3
  -7  -8   0 21892.2 766.839   3
  -7  -8   1 5789.51 412.935   3
  -7  -8   2 740.094 165.360   3
  -7  -8   3 2024.88 259.722   3
  -7  -8   4 7481.68 507.060   3
  -7  -8   5 8967.80 575.789   3
  -7  -8   6 3022.92 346.312   3
  -7  -8   7 114.364 102.260   3
  -7  -8   8 2945.86 377.353   3
  -7  -8   9 3055.01 397.005   3
  -7  -8  10 807.526 206.329   3
  -7  -8  11 268.582 145.695   3
  -7  -7  -9 248.104 65.5553   3
  -7  -7  -8 3867.72 236.007   3
  -7  -7  -7 12925.5 445.286   3
  -7  -7  -6 15416.5 503.093   3
  -7  -7  -5 505.786 117.333   3
  -7  -7  -4 6273.70 343.006   3
  -7  -7  -3 12989.4 516.034   3
  -7  -7  -2 7618.31 410.268   3
  -7  -7  -1 4607.66 327.852   3
  -7  -7   0 829.054 144.970   3
  -7  -7   1 2963.85 282.603   3
  -7  -7   2 7818.18 477.543   3
  -7  -7   3 1389.01 214.736   3
  -7  -7   4 11.9315 119.310   3
  -7  -7   5 1917.73 275.141   3
  -7  -7   6 7476.88 537.170   3
  -7  -7   7 2512.60 340.118   3
  -7  -7   8 300.652 132.352   3
  -7  -7   9 358.232 108.577   3
  -7  -7  10 1743.74 313.347   3
  -7  -7  11 1544.47 319.755   3
  -7  -6  -9 20087.6 447.795   3
  -7  -6  -8 16437.1 432.389   3
  -7  -6  -7 2068.92 171.753   3
  -7  -6  -6 3663.81 232.009   3
  -7  -6  -5 21364.7 579.631   3
  -7  -6  -4 11230.2 444.546   3
  -7  -6  -3 3574.15 266.579   3
  -7  -6  -2 536.943 113.103   3
  -7  -6  -1 7322.67 405.297   3
  -7  -6   0 14239.6 586.747   3
  -7  -6   1 8829.41 483.196   3
  -7  -6   2 94.0678 73.5055   3
  -7  -6   3 2983.95 296.516   3
  -7  -6   4 4185.69 376.592   3
  -7  -6   5 6035.01 464.705   3
  -7  -6   6 2189.21 285.247   3
  -7  -6   7 1921.68 269.459   3
  -7  -6   8 3440.63 392.248   3
  -7  -6   9 1355.11 264.004   3
  -7  -6  10-92.7767 147.236   3
  -7  -6  11 343.070 99.0121   3
  -7  -6  12 1877.53 337.165   3
  -7  -5  -9 453.518 56.9318   3
  -7  -5  -8 2800.92 157.068   3
  -7  -5  -7 6835.81 268.558   3
  -7  -5  -6 4809.54 244.616   3
  -7  -5  -5 510.637 86.1991   3
  -7  -5  -4 9743.90 393.276   3
  -7  -5  -3 7278.06 357.335   3
  -7  -5  -2 9546.41 431.255   3
  -7  -5  -1 900.356 137.656   3
  -7  -5   0 1370.94 161.587   3
  -7  -5   1 5229.48 358.591   3
  -7  -5   2 4136.01 337.920   3
  -7  -5   3 343.440 88.9320   3
  -7  -5   4 1425.93 203.699   3
  -7  -5   5 3595.45 354.047   3
  -7  -5   6 5036.25 430.226   3
  -7  -5   7 4488.38 425.455   3
  -7  -5   8 299.808 130.986   3
  -7  -5   9 3074.88 376.942   3
  -7  -5  10 4823.21 497.370   3
  -7  -5  11 1305.30 282.293   3
  -7  -5  12 16.0847 141.520   3
  -7  -4  -8 2269.08 115.021   3
  -7  -4  -7 6.87062 27.7089   3
  -7  -4  -6 4733.55 226.825   3
  -7  -4  -5 7165.90 304.935   3
  -7  -4  -4 3121.46 214.950   3
  -7  -4  -3 1861.11 171.572   3
  -7  -4  -2 2761.65 228.048   3
  -7  -4  -1 4659.96 312.126   3
  -7  -4   0 5313.35 350.192   3
  -7  -4   1-51.3312 111.506   3
  -7  -4   2 1294.69 182.591   3
  -7  -4   3 5563.36 404.256   3
  -7  -4   4 7557.86 493.532   3
  -7  -4   5 2368.76 297.138   3
  -7  -4   6 223.762 98.5508   3
  -7  -4   7 4314.14 411.279   3
  -7  -4   8 8740.36 611.666   3
  -7  -4   9 865.834 217.377   3
  -7  -4  10 301.540 117.749   3
  -7  -4  11 1589.27 283.302   3
  -7  -4  12 791.223 197.815   3
  -7  -3  -6 194.675 47.8410   3
  -7  -3  -5 2233.47 159.486   3
  -7  -3  -4 5485.51 282.685   3
  -7  -3  -3 5910.59 306.282   3
  -7  -3  -2 967.924 129.039   3
  -7  -3  -1 228.231 65.0631   3
  -7  -3   0 3914.43 290.433   3
  -7  -3   1 14828.8 606.576   3
  -7  -3   2 2908.98 290.728   3
  -7  -3   3-39.0269 103.351   3
  -7  -3   4 2539.36 275.209   3
  -7  -3   5 4858.84 402.819   3
  -7  -3   6 1847.10 253.603   3
  -7  -3   7 311.656 129.668   3
  -7  -3   8 1243.61 209.229   3
  -7  -3   9 5825.17 507.291   3
  -7  -3  10 5812.61 537.051   3
  -7  -3  11 781.555 202.576   3
  -7  -3  12 51.8900 116.724   3
  -7  -2  -4 439.800 67.8600   3
  -7  -2  -3 609.867 93.8506   3
  -7  -2  -2 2519.45 210.382   3
  -7  -2  -1 3783.32 269.964   3
  -7  -2   0 76.3391 101.457   3
  -7  -2   1-195.410 120.822   3
  -7  -2   2 7320.61 439.619   3
  -7  -2   3 9341.93 518.425   3
  -7  -2   4 2696.92 290.086   3
  -7  -2   5-115.591 161.019   3
  -7  -2   6 3319.09 337.184   3
  -7  -2   7 2657.25 320.309   3
  -7  -2   8 3067.29 342.901   3
  -7  -2   9-198.720 153.842   3
  -7  -1   0 9769.62 456.849   3
  -7  -1   1 8695.88 454.059   3
  -7  -1   2 1554.22 200.874   3
  -7  -1   3 935.891 155.962   3
  -7  -1   4 7018.26 466.181   3
  -7  -1   5 6184.37 455.622   3
  -7  -1   6 3461.26 355.856   3
  -6 -17  -9 3797.31 422.818   3
  -6 -17  -8 1370.12 223.361   3
  -6 -17  -7 34.7733 111.742   3
  -6 -17  -6 1180.25 224.414   3
  -6 -17  -5 2135.37 335.999   3
  -6 -17  -4 1902.03 291.360   3
  -6 -17  -3 411.435 169.427   3
  -6 -17  -2 1355.89 265.376   3
  -6 -17  -1 8106.89 614.814   3
  -6 -16 -10-84.8256 124.325   3
  -6 -16  -9 1631.28 260.573   3
  -6 -16  -8 4770.06 451.175   3
  -6 -16  -7 3918.84 406.585   3
  -6 -16  -6 1405.91 249.598   3
  -6 -16  -5 317.320 139.684   3
  -6 -16  -4 5408.30 475.483   3
  -6 -16  -3 8422.63 592.686   3
  -6 -16  -2 3559.82 387.205   3
  -6 -16  -1 114.272 96.0816   3
  -6 -16   0 5980.08 525.529   3
  -6 -16   1 10722.9 693.998   3
  -6 -16   2 8379.21 628.762   3
  -6 -16   3 637.067 196.007   3
  -6 -15 -10 2388.33 302.468   3
  -6 -15  -9 1965.12 284.132   3
  -6 -15  -8 68.1953 100.209   3
  -6 -15  -7 2538.96 309.178   3
  -6 -15  -6 6589.74 490.635   3
  -6 -15  -5 5375.39 452.165   3
  -6 -15  -4 333.478 146.725   3
  -6 -15  -3 327.523 125.305   3
  -6 -15  -2 5166.77 455.926   3
  -6 -15  -1 7312.14 551.017   3
  -6 -15   0 5161.99 455.870   3
  -6 -15   1 88.2447 95.4491   3
  -6 -15   2 1503.43 273.827   3
  -6 -15   3 4686.79 457.232   3
  -6 -15   4 3274.08 401.213   3
  -6 -15   5 2422.71 362.122   3
  -6 -14 -11 1676.81 242.942   3
  -6 -14 -10 33.8163 110.564   3
  -6 -14  -9 3025.89 324.131   3
  -6 -14  -8 7626.17 512.882   3
  -6 -14  -7 7925.69 515.234   3
  -6 -14  -6 1020.31 186.864   3
  -6 -14  -5 393.250 134.514   3
  -6 -14  -4 6820.50 488.442   3
  -6 -14  -3 7250.31 505.528   3
  -6 -14  -2 4867.28 418.863   3
  -6 -14  -1 54.6016 106.211   3
  -6 -14   0 3654.91 371.097   3
  -6 -14   1 11198.8 668.271   3
  -6 -14   2 9729.86 635.671   3
  -6 -14   3 987.489 226.110   3
  -6 -14   4 3734.11 401.798   3
  -6 -14   5 8719.28 633.629   3
  -6 -14   6 6750.38 565.817   3
  -6 -14   7 1420.14 282.679   3
  -6 -13 -11 2801.03 301.299   3
  -6 -13 -10 3612.78 330.395   3
  -6 -13  -9 2788.15 297.891   3
  -6 -13  -8 173.759 97.4637   3
  -6 -13  -7 3229.18 318.817   3
  -6 -13  -6 7471.54 479.568   3
  -6 -13  -5 5090.88 399.306   3
  -6 -13  -4 1573.12 224.257   3
  -6 -13  -3 1182.30 202.525   3
  -6 -13  -2 5204.36 418.299   3
  -6 -13  -1 8975.81 551.308   3
  -6 -13   0 2109.34 282.835   3
  -6 -13   1-72.6510 95.4801   3
  -6 -13   2 3488.40 375.717   3
  -6 -13   3 4643.09 426.036   3
  -6 -13   4 3517.47 391.975   3
  -6 -13   5 105.440 132.660   3
  -6 -13   6 2268.85 324.518   3
  -6 -13   7 7278.79 591.966   3
  -6 -13   8 6378.04 567.313   3
  -6 -12 -11 394.532 106.072   3
  -6 -12 -10 226.470 78.8189   3
  -6 -12  -9 4676.75 360.068   3
  -6 -12  -8 7781.67 468.700   3
  -6 -12  -7 4157.83 344.179   3
  -6 -12  -6 118.862 64.6644   3
  -6 -12  -5 3757.52 328.961   3
  -6 -12  -4 9298.84 516.833   3
  -6 -12  -3 8078.99 485.702   3
  -6 -12  -2 639.506 138.263   3
  -6 -12  -1 1249.09 206.279   3
  -6 -12   0 8724.37 536.633   3
  -6 -12   1 7049.66 496.718   3
  -6 -12   2 4163.39 382.972   3
  -6 -12   3 67.2474 100.495   3
  -6 -12   4 1845.79 272.881   3
  -6 -12   5 7073.57 542.833   3
  -6 -12   6 2958.76 352.556   3
  -6 -12   7 289.910 118.946   3
  -6 -12   8 3672.11 419.506   3
  -6 -12   9 3077.76 395.726   3
  -6 -11 -11 5262.95 360.256   3
  -6 -11 -10 4921.63 352.853   3
  -6 -11  -9 1435.65 193.994   3
  -6 -11  -8 788.179 154.481   3
  -6 -11  -7 5769.73 379.918   3
  -6 -11  -6 5645.36 376.859   3
  -6 -11  -5 3416.55 300.052   3
  -6 -11  -4 509.128 119.983   3
  -6 -11  -3 458.547 118.595   3
  -6 -11  -2 7073.71 440.480   3
  -6 -11  -1 7833.47 481.441   3
  -6 -11   0 524.683 145.475   3
  -6 -11   1 4301.27 368.369   3
  -6 -11   2 5517.97 423.429   3
  -6 -11   3 7667.78 516.592   3
  -6 -11   4 969.170 188.348   3
  -6 -11   5 365.379 134.700   3
  -6 -11   6 7449.74 543.298   3
  -6 -11   7 4124.98 420.861   3
  -6 -11   8 1065.50 220.153   3
  -6 -11   9 432.261 186.218   3
  -6 -11  10 1095.87 242.959   3
  -6 -10 -11 292.953 101.248   3
  -6 -10 -10 286.538 94.6706   3
  -6 -10  -9 3321.20 267.301   3
  -6 -10  -8 7008.91 389.012   3
  -6 -10  -7 2597.15 233.879   3
  -6 -10  -6 2005.55 213.169   3
  -6 -10  -5 6745.40 395.061   3
  -6 -10  -4 7771.82 429.521   3
  -6 -10  -3 1091.42 154.267   3
  -6 -10  -2 59.5381 78.8154   3
  -6 -10  -1 3694.25 318.485   3
  -6 -10   0 10817.7 552.080   3
  -6 -10   1 4718.88 379.732   3
  -6 -10   2 380.172 126.904   3
  -6 -10   3 3077.92 328.540   3
  -6 -10   4 7035.27 493.338   3
  -6 -10   5 3800.87 371.976   3
  -6 -10   6 86.5577 116.466   3
  -6 -10   7 2859.43 356.975   3
  -6 -10   8 6466.39 525.172   3
  -6 -10   9 6672.08 573.228   3
  -6 -10  10 866.219 217.827   3
  -6 -10  11 607.470 174.058   3
  -6  -9 -11 5209.65 311.514   3
  -6  -9 -10 3633.60 260.662   3
  -6  -9  -9-6.57467 50.0259   3
  -6  -9  -8 3337.89 255.642   3
  -6  -9  -7 8511.91 406.787   3
  -6  -9  -6 5650.24 337.337   3
  -6  -9  -6 5608.81 226.747   1
  -6  -9  -5 177.366 34.6583   1
  -6  -9  -5 242.783 86.2987   3
  -6  -9  -4 652.210 119.879   3
  -6  -9  -3 8443.71 437.901   3
  -6  -9  -2 12651.3 548.620   3
  -6  -9  -1 4964.11 359.636   3
  -6  -9   0 2312.64 251.133   3
  -6  -9   1 16606.3 673.406   3
  -6  -9   2 14259.7 643.234   3
  -6  -9   3 2150.34 265.848   3
  -6  -9   4-95.7599 147.805   3
  -6  -9   5 5023.46 420.817   3
  -6  -9   6 12580.0 680.385   3
  -6  -9   7 4898.43 441.615   3
  -6  -9   8 80.2443 141.195   3
  -6  -9   9 1337.68 245.748   3
  -6  -9  10 4390.19 452.449   3
  -6  -9  11 3342.64 414.787   3
  -6  -9  12 1988.19 338.825   3
  -6  -8 -11 193.894 73.4870   3
  -6  -8 -10 2669.51 205.313   3
  -6  -8  -9 6145.83 313.764   3
  -6  -8  -8 5534.19 302.133   3
  -6  -8  -8 5352.61 283.326   1
  -6  -8  -7 927.976 100.057   1
  -6  -8  -7 958.061 124.120   3
  -6  -8  -6 2103.41 142.090   1
  -6  -8  -6 2443.20 208.289   3
  -6  -8  -5 22796.0 647.801   3
  -6  -8  -5 20372.5 368.597   1
  -6  -8  -4 1797.38 193.120   3
  -6  -8  -3 116.255 64.5014   3
  -6  -8  -2 5213.22 338.074   3
  -6  -8  -1 7219.67 406.095   3
  -6  -8   0 5178.78 357.437   3
  -6  -8   1 2166.52 237.925   3
  -6  -8   2 387.887 87.0969   3
  -6  -8   3 10343.5 544.337   3
  -6  -8   4 17281.3 729.381   3
  -6  -8   5 7337.44 505.854   3
  -6  -8   6-121.469 116.633   3
  -6  -8   7 4013.02 376.171   3
  -6  -8   8 6887.17 532.222   3
  -6  -8   9 2843.56 347.242   3
  -6  -8  10 298.844 107.633   3
  -6  -8  11 857.090 178.048   3
  -6  -8  12 3480.00 426.864   3
  -6  -7 -11 4397.61 233.223   3
  -6  -7 -10 761.542 103.117   3
  -6  -7  -9 1303.13 137.448   3
  -6  -7  -8 5597.17 281.867   3
  -6  -7  -8 5512.15 289.208   1
  -6  -7  -7 8900.31 336.585   1
  -6  -7  -7 8946.27 359.951   3
  -6  -7  -6 2903.02 212.517   3
  -6  -7  -6 2802.91 168.188   1
  -6  -7  -5 220.976 67.6950   3
  -6  -7  -4 12374.6 464.891   3
  -6  -7  -3 10707.6 446.743   3
  -6  -7  -2 18806.2 604.972   3
  -6  -7  -1 8427.97 424.899   3
  -6  -7   0 1183.86 164.736   3
  -6  -7   1 11196.1 516.872   3
  -6  -7   2 8360.16 462.000   3
  -6  -7   3 368.677 104.755   3
  -6  -7   4 2774.50 286.766   3
  -6  -7   5 8738.47 526.488   3
  -6  -7   6 10712.9 598.975   3
  -6  -7   7 6236.64 485.978   3
  -6  -7   8 493.204 103.924   3
  -6  -7   9 1236.51 218.670   3
  -6  -7  10 3847.34 422.005   3
  -6  -7  11 3082.81 392.532   3
  -6  -7  12 1185.43 242.069   3
  -6  -7  13-4.58623 166.621   3
  -6  -6 -11 4383.01 202.267   3
  -6  -6 -10 10999.9 329.068   3
  -6  -6  -9 14410.9 387.680   3
  -6  -6  -8 5847.52 303.491   1
  -6  -6  -8 5440.92 246.128   3
  -6  -6  -7 190.275 55.8387   1
  -6  -6  -7 184.050 60.7712   3
  -6  -6  -6 6790.15 303.124   3
  -6  -6  -6 6564.31 266.023   1
  -6  -6  -5 14801.9 462.813   3
  -6  -6  -4 8260.77 356.472   3
  -6  -6  -3 1587.66 167.321   3
  -6  -6  -2 13654.9 493.138   3
  -6  -6  -1 19706.9 619.405   3
  -6  -6   0 22372.1 684.597   3
  -6  -6   1 6663.33 383.833   3
  -6  -6   2 364.551 107.820   3
  -6  -6   3 14036.5 604.684   3
  -6  -6   4 23230.0 813.008   3
  -6  -6   5 11527.8 604.797   3
  -6  -6   6 700.803 164.744   3
  -6  -6   7 8023.37 533.113   3
  -6  -6   8 9611.00 616.281   3
  -6  -6   9 6875.18 533.343   3
  -6  -6  10 196.882 130.555   3
  -6  -6  11 944.069 210.200   3
  -6  -6  12 1807.06 309.643   3
  -6  -6  13 1853.80 340.659   3
  -6  -5 -11 3279.59 136.120   3
  -6  -5 -10 779.828 73.7782   3
  -6  -5  -9 7930.29 248.583   3
  -6  -5  -8 9896.30 294.616   3
  -6  -5  -8 10184.6 404.462   1
  -6  -5  -7 6404.16 251.354   3
  -6  -5  -7 6737.64 306.743   1
  -6  -5  -6 582.416 92.9103   3
  -6  -5  -6 511.922 85.3842   1
  -6  -5  -5 271.412 68.9106   3
  -6  -5  -4 10532.9 380.584   3
  -6  -5  -3 22866.9 585.838   3
  -6  -5  -2 10896.0 423.895   3
  -6  -5  -1 161.835 81.9988   3
  -6  -5   0 8508.64 412.618   3
  -6  -5   1 25498.5 742.196   3
  -6  -5   2 17980.7 647.608   3
  -6  -5   3 1324.86 194.799   3
  -6  -5   4 2813.63 286.861   3
  -6  -5   5 7008.60 458.511   3
  -6  -5   6 5800.43 440.471   3
  -6  -5   7 8223.15 541.045   3
  -6  -5   8 366.794 127.638   3
  -6  -5   9 2105.42 297.662   3
  -6  -5  10 5273.46 490.180   3
  -6  -5  11 2496.01 348.517   3
  -6  -5  12-140.618 184.525   3
  -6  -5  13 213.012 113.241   3
  -6  -5  14 816.398 201.371   3
  -6  -4  -9 3529.07 116.120   3
  -6  -4  -8 46.0091 65.2232   1
  -6  -4  -8 101.107 31.7609   3
  -6  -4  -7 6887.36 317.860   1
  -6  -4  -7 6543.94 220.558   3
  -6  -4  -6 19929.4 423.253   3
  -6  -4  -5 23329.4 496.444   3
  -6  -4  -4 6631.75 286.539   3
  -6  -4  -3 114.000 45.4734   3
  -6  -4  -2 10150.6 396.858   3
  -6  -4  -1 17721.6 549.940   3
  -6  -4   0 11927.3 479.238   3
  -6  -4   1 1403.86 170.319   3
  -6  -4   2 5115.85 338.428   3
  -6  -4   3 20092.6 714.739   3
  -6  -4   4 8835.49 498.339   3
  -6  -4   5 597.122 124.579   3
  -6  -4   6 744.284 119.161   3
  -6  -4   7 450.551 150.813   3
  -6  -4   8 7312.13 524.124   3
  -6  -4   9 77.6498 108.635   3
  -6  -4  10 141.331 139.379   3
  -6  -4  11 2017.49 296.557   3
  -6  -4  12 2492.30 352.800   3
  -6  -4  13 280.831 123.648   3
  -6  -4  14-323.257 236.421   3
  -6  -3  -7 11076.0 412.841   1
  -6  -3  -7 8239.16 202.803   3
  -6  -3  -6 159.072 44.5956   3
  -6  -3  -5 2114.92 140.041   3
  -6  -3  -4 18343.3 456.253   3
  -6  -3  -3 26284.4 585.829   3
  -6  -3  -2 7813.07 342.600   3
  -6  -3  -1 480.491 88.6858   3
  -6  -3   0 6886.91 361.378   3
  -6  -3   1 14698.1 555.169   3
  -6  -3   2 5265.06 345.478   3
  -6  -3   3-19.6679 89.8923   3
  -6  -3   4 3502.52 301.116   3
  -6  -3   5 6531.51 436.114   3
  -6  -3   6 1444.41 221.917   3
  -6  -3   7 237.200 85.9319   3
  -6  -3   8 748.888 161.004   3
  -6  -3   9 7644.45 542.982   3
  -6  -3  10 3029.22 355.925   3
  -6  -3  11-310.825 163.273   3
  -6  -3  12 1196.02 206.073   3
  -6  -3  13 3377.24 431.463   3
  -6  -2  -5 15446.7 344.275   3
  -6  -2  -4 3097.24 179.577   3
  -6  -2  -3 2286.54 164.037   3
  -6  -2  -2 7849.26 338.577   3
  -6  -2  -1 6341.84 326.936   3
  -6  -2   0-38.2690 76.2532   3
  -6  -2   1 1750.47 173.565   3
  -6  -2   2 16855.0 622.102   3
  -6  -2   3 8623.29 461.347   3
  -6  -2   4 114.909 92.4757   3
  -6  -2   5 4016.98 339.314   3
  -6  -2   6 7823.80 501.720   3
  -6  -2   7 3208.05 323.187   3
  -6  -2   8 185.159 120.574   3
  -6  -2   9-113.688 165.446   3
  -6  -2  10 2420.46 308.296   3
  -6  -2  11 5238.96 489.828   3
  -6  -1  -3 8069.97 306.362   3
  -6  -1  -2 377.161 65.0461   3
  -6  -1  -1 9330.30 384.981   3
  -6  -1   0 14660.5 514.353   3
  -6  -1   1 1296.17 156.040   3
  -6  -1   2-25.8272 116.341   3
  -6  -1   3 2887.85 260.535   3
  -6  -1   4 7682.25 454.966   3
  -6  -1   5 7916.03 490.323   3
  -6  -1   6 96.1523 79.4008   3
  -6  -1   7 3327.93 337.538   3
  -6  -1   8 8163.82 552.529   3
  -6  -1   9 4890.37 434.280   3
  -6   1  -7 218.100 84.8731   4
  -6   2  -8 2875.31 217.782   4
  -6   2  -7 5967.86 293.082   4
  -6   3  -9 7875.96 362.322   4
  -6   3  -8 405.192 79.3623   4
  -6   4  -9 930.482 124.421   4
  -6   4  -9 438.806 59.9231   2
  -6   4  -8 11316.5 376.338   4
  -6   4  -8 9280.79 286.637   2
  -6   4  -7 14804.9 388.579   2
  -6   4  -6 4269.16 225.723   2
  -6   4  -5 261.149 69.2541   2
  -6   4  -4 4853.83 277.298   2
  -6   4  -3 12516.9 458.905   2
  -6   5  -8 1284.35 129.274   2
  -6   5  -7 941.094 121.562   2
  -6   5  -6 9599.40 366.489   2
  -6   5  -5 16647.1 509.296   2
  -6   5  -4 16409.5 529.999   2
  -6   5  -3 993.039 145.166   2
  -6   6  -7 10591.9 408.121   2
  -6   6  -6 2380.44 209.121   2
  -6   6  -5 1795.43 186.880   2
  -5 -17 -10 3933.90 426.094   3
  -5 -17  -9 2120.82 330.561   3
  -5 -17  -8 213.929 146.906   3
  -5 -17  -7 1451.73 273.114   3
  -5 -17  -6 2752.51 359.059   3
  -5 -17  -5 4054.25 422.975   3
  -5 -17  -4 1059.31 216.434   3
  -5 -17  -3-164.127 137.537   3
  -5 -17  -2 3833.61 410.932   3
  -5 -17  -1 8456.50 623.055   3
  -5 -17   0 4073.23 445.276   3
  -5 -17   1 535.558 174.005   3
  -5 -17   2 2346.46 331.176   3
  -5 -16 -11 693.592 195.256   3
  -5 -16 -10-40.0109 124.600   3
  -5 -16  -9 489.871 146.433   3
  -5 -16  -8 4050.12 414.449   3
  -5 -16  -7 5588.44 478.405   3
  -5 -16  -6 528.868 175.183   3
  -5 -16  -5 574.993 162.557   3
  -5 -16  -4 4145.24 410.199   3
  -5 -16  -3 2094.33 273.471   3
  -5 -16  -2 1283.81 254.741   3
  -5 -16  -1 344.146 122.549   3
  -5 -16   0 4619.58 445.457   3
  -5 -16   1 5612.09 500.978   3
  -5 -16   2 2940.13 370.000   3
  -5 -16   3-52.5625 127.318   3
  -5 -16   4 531.900 208.690   3
  -5 -16   5 3943.92 469.172   3
  -5 -15 -11 581.052 163.888   3
  -5 -15 -10 1998.22 289.211   3
  -5 -15  -9 773.525 175.192   3
  -5 -15  -8 132.886 94.7729   3
  -5 -15  -7 966.087 197.449   3
  -5 -15  -6 2869.72 337.660   3
  -5 -15  -5 3098.01 338.691   3
  -5 -15  -4 587.316 145.068   3
  -5 -15  -3 911.463 198.634   3
  -5 -15  -2 2968.64 336.489   3
  -5 -15  -1 3746.74 381.010   3
  -5 -15   0 870.138 190.047   3
  -5 -15   1 388.363 128.938   3
  -5 -15   2 4837.98 449.863   3
  -5 -15   3 9241.83 634.067   3
  -5 -15   4 3521.02 391.527   3
  -5 -15   5 101.059 127.218   3
  -5 -15   6 5313.67 509.465   3
  -5 -15   7 8992.44 684.511   3
  -5 -14 -10-291.658 163.436   3
  -5 -14  -9 3164.20 324.372   3
  -5 -14  -8 4360.18 390.050   3
  -5 -14  -7 2443.91 294.468   3
  -5 -14  -6 3.31799 79.4024   3
  -5 -14  -5 2844.79 314.805   3
  -5 -14  -4 7095.12 498.462   3
  -5 -14  -3 5322.77 428.280   3
  -5 -14  -2 750.804 161.398   3
  -5 -14  -1 1167.36 217.363   3
  -5 -14   0 8128.95 544.487   3
  -5 -14   1 8823.87 573.823   3
  -5 -14   2 3739.84 394.204   3
  -5 -14   3 277.517 105.819   3
  -5 -14   4 6620.49 523.845   3
  -5 -14   5 11310.3 705.055   3
  -5 -14   6 5741.12 519.249   3
  -5 -14   7 613.875 184.115   3
  -5 -14   8 4562.20 480.471   3
  -5 -14   9 7691.62 629.814   3
  -5 -13 -10 1367.15 218.680   3
  -5 -13  -9 326.558 118.852   3
  -5 -13  -8 775.071 174.667   3
  -5 -13  -7 4089.42 358.303   3
  -5 -13  -6 6457.36 440.710   3
  -5 -13  -5 4466.56 372.787   3
  -5 -13  -4 51.7742 72.8180   3
  -5 -13  -3 5510.45 418.396   3
  -5 -13  -2 13879.9 663.875   3
  -5 -13  -1 11537.5 610.976   3
  -5 -13   0 882.358 190.525   3
  -5 -13   1 2770.23 310.395   3
  -5 -13   2 8471.62 553.273   3
  -5 -13   3 11807.9 668.305   3
  -5 -13   4 4164.16 418.957   3
  -5 -13   5 106.578 126.683   3
  -5 -13   6 4829.54 460.564   3
  -5 -13   7 6840.93 547.722   3
  -5 -13   8 6870.32 565.327   3
  -5 -13   9 153.477 94.8824   3
  -5 -13  10 17.3200 167.923   3
  -5 -12 -11 13.5972 56.0292   2
  -5 -12  -9 5448.98 386.905   3
  -5 -12  -8 7092.39 442.026   3
  -5 -12  -7 1525.00 207.497   3
  -5 -12  -6 3199.50 302.521   3
  -5 -12  -5 7474.72 461.470   3
  -5 -12  -4 13911.8 619.341   3
  -5 -12  -3 6742.60 433.741   3
  -5 -12  -2-38.1640 84.9758   3
  -5 -12  -1 11093.6 574.743   3
  -5 -12   0 23782.4 851.331   3
  -5 -12   1 11841.0 611.443   3
  -5 -12   2 922.494 186.953   3
  -5 -12   3 1349.65 231.067   3
  -5 -12   4 8496.37 554.749   3
  -5 -12   5 10187.4 620.248   3
  -5 -12   6 3910.32 396.108   3
  -5 -12   7 159.095 136.724   3
  -5 -12   8 4617.57 453.039   3
  -5 -12   9 11132.2 716.444   3
  -5 -12  10 3194.08 411.385   3
  -5 -12  11 96.4871 108.163   3
  -5 -11 -12 1869.05 200.016   2
  -5 -11 -11 6249.88 368.318   2
  -5 -11  -9 36.5793 63.8400   3
  -5 -11  -8 2910.55 270.217   3
  -5 -11  -7 17202.5 655.771   3
  -5 -11  -6 24582.8 779.457   3
  -5 -11  -5 2165.24 243.683   3
  -5 -11  -4 1124.59 176.185   3
  -5 -11  -3 11944.8 551.209   3
  -5 -11  -2 14031.8 609.376   3
  -5 -11  -1 8112.41 471.791   3
  -5 -11   0 313.264 99.9270   3
  -5 -11   1 7379.92 461.643   3
  -5 -11   2 16539.2 717.677   3
  -5 -11   3 14514.3 685.867   3
  -5 -11   4 628.221 164.818   3
  -5 -11   5 1411.52 224.933   3
  -5 -11   6 5222.48 449.841   3
  -5 -11   7 4401.50 413.187   3
  -5 -11   8 735.689 162.685   3
  -5 -11   9-70.6897 119.939   3
  -5 -11  10 3463.08 419.889   3
  -5 -11  11 3377.30 415.673   3
  -5 -11  12 1833.50 329.834   3
  -5 -10 -12 1650.59 180.830   2
  -5 -10 -11 31.9073 61.4902   2
  -5 -10  -9 11209.4 494.911   3
  -5 -10  -8 6869.68 391.006   3
  -5 -10  -7 369.192 107.798   3
  -5 -10  -6 6793.82 389.174   3
  -5 -10  -5 25597.1 750.358   3
  -5 -10  -4 11356.9 505.231   3
  -5 -10  -3 5180.09 344.290   3
  -5 -10  -2 1407.09 190.552   3
  -5 -10  -1 20028.2 701.693   3
  -5 -10   0 32877.6 917.782   3
  -5 -10   1 8242.79 473.092   3
  -5 -10   2 3809.61 338.508   3
  -5 -10   3 9622.11 539.062   3
  -5 -10   4 9596.89 552.006   3
  -5 -10   5 4167.67 368.387   3
  -5 -10   6 849.507 169.019   3
  -5 -10   7 781.777 188.848   3
  -5 -10   8 5884.13 477.884   3
  -5 -10   9 3413.43 387.339   3
  -5 -10  10 237.438 175.988   3
  -5 -10  11 1414.45 250.826   3
  -5 -10  12 4694.47 501.373   3
  -5 -10  13 4971.97 519.659   3
  -5  -9 -12 8503.05 370.342   2
  -5  -9 -11 8756.54 374.807   2
  -5  -9  -9-68.7047 85.0210   3
  -5  -9  -8 6143.00 341.412   3
  -5  -9  -7 16182.3 559.928   3
  -5  -9  -6 15118.4 539.641   3
  -5  -9  -5 756.268 138.279   3
  -5  -9  -4 12700.0 509.617   3
  -5  -9  -3 21305.3 662.168   3
  -5  -9  -2 6946.43 389.154   3
  -5  -9  -1 152.881 91.0322   3
  -5  -9   0 289.287 92.0565   3
  -5  -9   1 3228.06 289.378   3
  -5  -9   2 4888.97 362.001   3
  -5  -9   3 122.604 104.148   3
  -5  -9   4 2506.05 276.075   3
  -5  -9   5 7918.77 496.552   3
  -5  -9   6 11647.2 636.800   3
  -5  -9   7 2174.43 280.369   3
  -5  -9   8 438.884 141.965   3
  -5  -9   9 3401.78 369.858   3
  -5  -9  10 6839.73 539.575   3
  -5  -9  11 2336.38 347.600   3
  -5  -9  12 170.765 135.555   3
  -5  -9  13 2165.10 351.003   3
  -5  -8 -12 1266.81 138.051   2
  -5  -8 -11 2534.95 188.210   2
  -5  -8  -9 16836.5 528.680   3
  -5  -8  -8 17227.3 536.831   3
  -5  -8  -7 1708.54 176.700   3
  -5  -8  -6 2687.50 215.591   3
  -5  -8  -5 20889.9 601.286   3
  -5  -8  -4 5696.95 322.849   3
  -5  -8  -3 284.869 74.0348   3
  -5  -8  -3 176.933 21.5230   1
  -5  -8  -2 2629.64 224.430   3
  -5  -8  -1 7175.49 384.875   3
  -5  -8   0 10310.5 475.444   3
  -5  -8   1 6012.41 372.712   3
  -5  -8   2 897.774 162.813   3
  -5  -8   3 8791.91 482.241   3
  -5  -8   4 2956.08 290.682   3
  -5  -8   5 1389.94 208.408   3
  -5  -8   6 415.753 134.161   3
  -5  -8   7 6952.93 487.209   3
  -5  -8   8 6697.06 495.143   3
  -5  -8   9 2176.54 292.131   3
  -5  -8  10 401.131 135.174   3
  -5  -8  11 2980.94 380.248   3
  -5  -8  12 5468.77 513.677   3
  -5  -8  13 5843.71 553.197   3
  -5  -8  14 1536.20 285.722   3
  -5  -7 -12 5603.12 242.840   2
  -5  -7  -9 4362.00 252.022   3
  -5  -7  -8 4893.39 267.608   3
  -5  -7  -7 3947.45 237.473   3
  -5  -7  -6 944.450 120.790   3
  -5  -7  -5 299.793 80.6358   3
  -5  -7  -4 12791.7 276.482   1
  -5  -7  -4 13699.8 465.558   3
  -5  -7  -3 9089.67 387.810   3
  -5  -7  -2 3810.92 262.796   3
  -5  -7  -1 290.680 79.4301   3
  -5  -7   0 8021.49 408.026   3
  -5  -7   1 12261.9 510.562   3
  -5  -7   2 5224.88 346.421   3
  -5  -7   3 50.7431 65.6298   3
  -5  -7   4 10185.0 517.529   3
  -5  -7   5 15571.6 662.066   3
  -5  -7   6 9380.46 539.869   3
  -5  -7   7 9186.83 547.594   3
  -5  -7   8 1527.49 224.066   3
  -5  -7   9 7223.18 526.705   3
  -5  -7  10 12192.0 706.640   3
  -5  -7  11 3902.79 422.903   3
  -5  -7  12-103.976 107.017   3
  -5  -7  13 3193.30 416.065   3
  -5  -7  14 8578.80 684.521   3
  -5  -6 -10 9063.04 322.855   3
  -5  -6  -9 6752.07 279.598   3
  -5  -6  -8 1278.91 129.719   3
  -5  -6  -7 391.449 72.0269   3
  -5  -6  -6 4732.53 242.538   3
  -5  -6  -6 4737.72 228.687   1
  -5  -6  -5 7660.40 317.351   3
  -5  -6  -5 7532.18 257.167   1
  -5  -6  -4 2767.88 198.802   3
  -5  -6  -4 2687.41 132.815   1
  -5  -6  -3 10758.5 397.979   3
  -5  -6  -2 12432.9 447.160   3
  -5  -6  -1 12542.4 464.540   3
  -5  -6   0 5811.65 334.076   3
  -5  -6   1 834.497 131.281   3
  -5  -6   2 8010.47 415.698   3
  -5  -6   3 12450.5 537.784   3
  -5  -6   4 11714.0 542.748   3
  -5  -6   5 3090.95 299.274   3
  -5  -6   6 626.550 126.369   3
  -5  -6   7 6135.06 441.072   3
  -5  -6   8 24235.0 915.814   3
  -5  -6   9 4325.48 403.654   3
  -5  -6  10 956.187 211.567   3
  -5  -6  11 4932.65 456.181   3
  -5  -6  12 3086.40 375.011   3
  -5  -6  13 1157.74 247.599   3
  -5  -6  14 207.659 142.147   3
  -5  -6  15 861.774 222.333   3
  -5  -5 -10 2424.09 148.433   3
  -5  -5  -9 8283.76 269.446   3
  -5  -5  -8 7313.97 257.792   3
  -5  -5  -7 2937.12 201.027   1
  -5  -5  -7 2990.56 169.230   3
  -5  -5  -6 120.531 51.6041   3
  -5  -5  -6 128.837 47.1941   1
  -5  -5  -5 11714.7 330.555   1
  -5  -5  -5 11974.8 364.173   3
  -5  -5  -4 21384.4 505.400   3
  -5  -5  -4 21165.0 385.238   1
  -5  -5  -3 18560.1 495.432   3
  -5  -5  -2 510.132 99.2068   3
  -5  -5  -1 2499.43 197.993   3
  -5  -5   0 8723.38 385.851   3
  -5  -5   1 39342.2 854.535   3
  -5  -5   2 12017.6 496.568   3
  -5  -5   3 42.2692 78.0080   3
  -5  -5   4 7822.06 431.115   3
  -5  -5   5 16388.7 657.286   3
  -5  -5   6 6914.18 451.753   3
  -5  -5   7 914.443 163.632   3
  -5  -5   8 1730.66 231.132   3
  -5  -5   9 10736.6 628.470   3
  -5  -5  10 13651.6 733.017   3
  -5  -5  11 2435.85 338.091   3
  -5  -5  12-39.3817 160.453   3
  -5  -5  13 1714.03 305.821   3
  -5  -5  14 3651.32 425.394   3
  -5  -5  15 2850.18 387.690   3
  -5  -4 -12 67.4312 33.3124   3
  -5  -4 -11 1732.48 108.893   3
  -5  -4 -11 1729.11 102.761   3
  -5  -4 -10 8730.44 226.767   3
  -5  -4 -10 8713.00 245.762   3
  -5  -4  -9 3795.42 151.057   3
  -5  -4  -8 365.019 88.6676   1
  -5  -4  -8 412.486 57.4831   3
  -5  -4  -7 17747.3 493.988   1
  -5  -4  -7 16995.7 346.994   3
  -5  -4  -6 26169.5 554.696   1
  -5  -4  -6 26356.3 461.443   3
  -5  -4  -5 12049.9 348.320   1
  -5  -4  -5 11681.4 327.634   3
  -5  -4  -4 11.2943 39.4181   3
  -5  -4  -3 4673.20 232.535   3
  -5  -4  -2 12302.7 399.242   3
  -5  -4  -1 14870.6 463.501   3
  -5  -4   0 343.718 87.2648   3
  -5  -4   1 275.999 56.4229   3
  -5  -4   2 21097.7 641.592   3
  -5  -4   3 26701.9 760.201   3
  -5  -4   4 7804.82 434.290   3
  -5  -4   5 22.3865 122.515   3
  -5  -4   6 5617.27 397.392   3
  -5  -4   7 9612.32 546.920   3
  -5  -4   8 8290.05 521.314   3
  -5  -4   9 190.332 139.785   3
  -5  -4  10 1698.80 252.290   3
  -5  -4  11 6105.21 502.884   3
  -5  -4  12 4002.90 419.877   3
  -5  -4  13 194.652 119.087   3
  -5  -4  14 78.2124 134.801   3
  -5  -4  15 1079.56 230.235   3
  -5  -3  -8 18451.4 551.736   1
  -5  -3  -8 12186.3 198.002   3
  -5  -3  -7 15273.0 467.263   1
  -5  -3  -7 13065.0 243.353   3
  -5  -3  -6 121.957 40.1583   1
  -5  -3  -6 203.292 40.5960   3
  -5  -3  -5 23686.0 411.042   3
  -5  -3  -5 23351.7 633.723   4
  -5  -3  -5 24485.6 511.066   1
  -5  -3  -4 57783.8 708.332   3
  -5  -3  -3 36340.1 613.388   3
  -5  -3  -2 1604.01 138.044   3
  -5  -3  -1 8035.66 329.571   3
  -5  -3   0 30388.7 680.014   3
  -5  -3   1 22187.3 621.306   3
  -5  -3   2 11395.2 474.499   3
  -5  -3   3 2766.61 237.019   3
  -5  -3   4 21414.3 711.887   3
  -5  -3   5 17009.0 663.048   3
  -5  -3   6 4706.32 362.564   3
  -5  -3   7-7.50580 116.479   3
  -5  -3   8 1337.82 195.573   3
  -5  -3   9 12274.8 656.367   3
  -5  -3  10 6611.37 501.555   3
  -5  -3  11 957.332 185.622   3
  -5  -3  12 4.20276 157.387   3
  -5  -3  13 2476.71 348.155   3
  -5  -3  14 1481.06 306.563   3
  -5  -2  -8 4130.41 268.484   1
  -5  -2  -7 33540.7 714.841   1
  -5  -2  -6 51534.5 943.456   4
  -5  -2  -6 52206.7 833.775   1
  -5  -2  -5 5597.51 185.794   3
  -5  -2  -5 6029.25 309.040   4
  -5  -2  -4 3678.27 171.036   3
  -5  -2  -3 29547.3 534.009   3
  -5  -2  -2 30993.7 595.324   3
  -5  -2  -1 11106.6 385.521   3
  -5  -2   0-51.1395 80.9594   3
  -5  -2   1 6169.13 325.261   3
  -5  -2   2 12609.0 491.736   3
  -5  -2   3 16922.7 599.674   3
  -5  -2   4 5037.63 339.717   3
  -5  -2   5 147.982 86.9759   3
  -5  -2   6 9777.35 517.849   3
  -5  -2   7 14995.6 672.774   3
  -5  -2   8 1315.43 201.389   3
  -5  -2   9 312.631 82.5686   3
  -5  -2  10 4711.50 416.675   3
  -5  -2  11 1812.29 268.102   3
  -5  -2  12 67.0163 131.224   3
  -5  -2  13-123.627 152.591   3
  -5  -1  -7 1426.62 170.434   4
  -5  -1  -7 1468.44 153.559   1
  -5  -1  -6 1393.95 151.227   4
  -5  -1  -6 1430.52 143.614   1
  -5  -1  -5 42739.3 780.998   4
  -5  -1  -4 24517.3 403.596   3
  -5  -1  -3 17343.8 387.863   3
  -5  -1  -2 835.535 94.1457   3
  -5  -1  -1 13308.8 417.924   3
  -5  -1   0 25688.8 623.106   3
  -5  -1   1 18384.2 561.343   3
  -5  -1   2 5107.49 307.562   3
  -5  -1   3 4599.98 308.930   3
  -5  -1   4 13668.2 563.923   3
  -5  -1   5 9635.07 496.758   3
  -5  -1   6 982.190 146.017   3
  -5  -1   7 662.278 110.552   3
  -5  -1   8 3051.02 306.190   3
  -5  -1   9 2794.92 308.404   3
  -5  -1  10 1562.83 217.672   3
  -5   0  -8 8035.70 379.376   4
  -5   0  -7 19689.8 561.677   4
  -5   0  -7 19573.7 574.562   1
  -5   0  -6 11037.3 396.094   4
  -5   0  -5 7309.70 310.606   4
  -5   0   0 219.154 45.2970   3
  -5   0   1 12969.8 471.826   3
  -5   0   2 14663.6 531.543   3
  -5   0   3 5701.73 349.474   3
  -5   0   4 400.086 86.7657   3
  -5   0   5 379.053 76.8859   3
  -5   0   6 5151.18 373.672   3
  -5   0   7 9095.27 526.665   3
  -5   1  -8 5490.86 301.121   4
  -5   1  -7 2348.48 187.231   4
  -5   1  -6 10876.1 376.920   4
  -5   1  -5 9259.63 332.775   4
  -5   2  -8 4075.97 248.038   4
  -5   2  -7 6393.17 294.578   4
  -5   2  -6 519.235 78.6721   4
  -5   3 -10 4956.00 137.030   2
  -5   3  -9 5352.54 159.130   2
  -5   3  -8 1225.35 138.002   4
  -5   3  -8 842.539 78.4582   2
  -5   3  -7 1028.12 87.5368   2
  -5   3  -7 1135.56 119.334   4
  -5   3  -6 6118.79 227.918   2
  -5   3  -6 6926.49 265.334   4
  -5   3  -5 8995.81 294.019   2
  -5   3  -4 879.942 102.107   2
  -5   3  -3 254.997 74.2086   2
  -5   3  -2 3391.06 223.325   2
  -5   3  -1 7451.55 344.678   2
  -5   4 -11 680.102 70.1099   2
  -5   4 -10 163.424 41.8199   2
  -5   4  -9 6431.93 226.352   2
  -5   4  -8 17891.1 473.131   4
  -5   4  -8 17176.0 380.983   2
  -5   4  -7 6710.31 266.214   4
  -5   4  -7 6718.79 251.843   2
  -5   4  -6 1560.49 129.590   2
  -5   4  -6 1441.82 108.527   4
  -5   4  -5 515.846 87.4526   2
  -5   4  -4 6635.41 299.287   2
  -5   4  -3 10936.5 396.786   2
  -5   4  -2 4181.95 262.260   2
  -5   4  -1 5473.69 312.489   2
  -5   4   0 19201.9 607.211   2
  -5   5 -10 6329.04 258.820   2
  -5   5  -9 2179.28 159.423   2
  -5   5  -8 18.7300 39.2323   4
  -5   5  -8 61.4940 45.5018   2
  -5   5  -7 10454.4 356.848   2
  -5   5  -7 10759.8 304.079   4
  -5   5  -6 13076.6 409.985   2
  -5   5  -5 10848.8 390.220   2
  -5   5  -4 968.016 124.291   2
  -5   5  -3 4962.91 291.810   2
  -5   5  -2 24543.5 664.735   2
  -5   5  -1 31374.9 787.565   2
  -5   6  -9 7398.55 318.072   2
  -5   6  -8 13835.6 358.112   4
  -5   6  -8 13710.2 442.745   2
  -5   6  -7 7990.03 346.518   2
  -5   6  -7 7309.50 217.755   4
  -5   6  -6 345.851 61.2031   2
  -5   6  -5 5519.93 297.503   2
  -5   6  -4 7407.61 357.839   2
  -5   6  -3 5936.69 332.454   2
  -5   7  -8 939.205 83.9453   4
  -5   7  -8 1071.38 142.542   2
  -5   7  -7 15211.5 514.467   2
  -5   7  -6 19028.8 588.993   2
  -5   7  -5 9220.53 416.685   2
  -4 -18  -5 849.296 223.671   3
  -4 -18  -4 6084.10 542.669   3
  -4 -18  -3 7400.48 593.643   3
  -4 -18  -2 2824.99 372.329   3
  -4 -18  -1 319.731 126.532   3
  -4 -18   0 7398.04 602.544   3
  -4 -17 -11 336.379 135.639   2
  -4 -17 -10 2118.32 314.486   2
  -4 -17  -9 904.158 192.445   3
  -4 -17  -8-366.980 166.085   3
  -4 -17  -7 2943.11 377.873   3
  -4 -17  -6 6393.42 539.752   3
  -4 -17  -5 5915.99 522.629   3
  -4 -17  -4 394.328 160.974   3
  -4 -17  -3 1537.57 269.577   3
  -4 -17  -2 4938.51 469.765   3
  -4 -17  -1 5434.63 490.726   3
  -4 -17   0 2120.78 320.897   3
  -4 -17   1-164.593 108.248   3
  -4 -17   2 2535.73 356.943   3
  -4 -17   3 4883.71 474.161   3
  -4 -17   4 923.335 209.636   3
  -4 -16 -11 820.042 199.101   2
  -4 -16 -10 108.420 93.4487   2
  -4 -16  -9 2702.31 326.509   2
  -4 -16  -8 5072.87 444.435   2
  -4 -16  -8 5446.62 472.612   3
  -4 -16  -7 5156.90 464.215   3
  -4 -16  -6 374.545 154.059   3
  -4 -16  -5 536.181 151.688   3
  -4 -16  -4 4312.37 419.494   3
  -4 -16  -3 3647.02 382.482   3
  -4 -16  -2 1535.92 256.991   3
  -4 -16  -1 66.3828 105.723   3
  -4 -16   0 3016.41 353.043   3
  -4 -16   1 4937.39 455.294   3
  -4 -16   2 3966.07 405.750   3
  -4 -16   3 184.955 116.415   3
  -4 -16   4 3627.30 415.212   3
  -4 -16   5 6871.33 569.282   3
  -4 -16   6 4671.31 481.829   3
  -4 -16   7 221.233 93.8795   3
  -4 -15 -12 403.216 118.393   2
  -4 -15 -11 2275.88 286.270   2
  -4 -15 -10 2062.15 276.835   2
  -4 -15  -9 1125.02 209.690   2
  -4 -15  -8 47.2080 82.4430   2
  -4 -15  -7 3111.44 349.374   3
  -4 -15  -6 5608.10 453.496   3
  -4 -15  -5 2474.92 308.881   3
  -4 -15  -4 161.360 98.2842   3
  -4 -15  -3 1623.57 255.973   3
  -4 -15  -2 3667.60 372.180   3
  -4 -15  -1 3919.29 387.525   3
  -4 -15   0 199.716 105.897   3
  -4 -15   1 1172.52 245.251   3
  -4 -15   2 4698.51 433.852   3
  -4 -15   3 3837.56 393.854   3
  -4 -15   4 712.883 194.651   3
  -4 -15   5 674.347 171.887   3
  -4 -15   6 4558.38 459.148   3
  -4 -15   7 5950.08 538.815   3
  -4 -15   8 4236.84 469.891   3
  -4 -15   9-20.2902 146.557   3
  -4 -14 -12 3615.97 353.268   2
  -4 -14 -11 293.322 85.9169   2
  -4 -14 -10 454.593 125.437   2
  -4 -14  -9 2244.54 267.599   2
  -4 -14  -8 4482.47 379.539   2
  -4 -14  -7 1503.16 217.494   2
  -4 -14  -6 140.909 80.6642   3
  -4 -14  -5 2820.10 316.410   3
  -4 -14  -4 4999.01 416.403   3
  -4 -14  -3 4541.93 390.865   3
  -4 -14  -2 133.403 118.824   3
  -4 -14  -1 2649.77 299.275   3
  -4 -14   0 8735.60 549.388   3
  -4 -14   1 4070.28 379.434   3
  -4 -14   2 886.619 205.745   3
  -4 -14   3 723.726 188.309   3
  -4 -14   4 2612.43 328.839   3
  -4 -14   5 6390.35 517.053   3
  -4 -14   6 1997.86 310.580   3
  -4 -14   7 864.631 238.994   3
  -4 -14   8 6761.86 558.183   3
  -4 -14   9 7139.72 581.997   3
  -4 -14  10 1205.68 240.599   3
  -4 -13 -13-287.105 102.952   2
  -4 -13 -12 1519.55 210.817   2
  -4 -13 -11 3432.09 323.479   2
  -4 -13 -10 1988.13 245.867   2
  -4 -13  -9 437.886 120.076   2
  -4 -13  -8 1139.18 193.175   2
  -4 -13  -7 6082.33 410.100   2
  -4 -13  -6 4064.94 363.431   3
  -4 -13  -5 431.452 121.807   3
  -4 -13  -4 310.972 125.890   3
  -4 -13  -3 1917.39 236.387   3
  -4 -13  -2 5158.22 398.535   3
  -4 -13  -1 3461.85 325.510   3
  -4 -13  -1 3172.49 177.119   1
  -4 -13   0 52.9830 85.2686   3
  -4 -13   0 29.9173 30.2549   1
  -4 -13   1 9284.28 545.002   3
  -4 -13   2 9644.58 564.525   3
  -4 -13   3 6796.84 494.166   3
  -4 -13   4 396.189 137.985   3
  -4 -13   5 1391.12 232.812   3
  -4 -13   6 11109.9 674.239   3
  -4 -13   7 9040.10 618.303   3
  -4 -13   8 1293.99 258.833   3
  -4 -13   9 912.574 229.575   3
  -4 -13  10 3620.15 418.264   3
  -4 -13  11 4177.69 439.859   3
  -4 -12 -13 3353.43 308.376   2
  -4 -12 -12 1414.11 208.656   2
  -4 -12 -11 87.7066 70.5582   2
  -4 -12 -10 1344.37 183.783   2
  -4 -12  -9 2551.55 261.252   2
  -4 -12  -8 3209.28 290.197   2
  -4 -12  -7 351.777 130.990   2
  -4 -12  -6 3262.08 291.396   2
  -4 -12  -5 11406.4 556.967   3
  -4 -12  -4 10293.6 542.344   3
  -4 -12  -3 1079.65 178.397   3
  -4 -12  -2 4042.97 341.184   3
  -4 -12  -1 13064.8 610.053   3
  -4 -12  -1 11875.6 311.049   1
  -4 -12   0 15021.9 331.016   1
  -4 -12   0 17416.3 711.158   3
  -4 -12   1 6284.78 436.407   3
  -4 -12   2 1889.18 257.297   3
  -4 -12   3 7877.19 498.334   3
  -4 -12   4 14837.8 715.774   3
  -4 -12   5 7060.88 512.623   3
  -4 -12   6 476.222 177.252   3
  -4 -12   7 4468.54 426.492   3
  -4 -12   8 8942.21 601.534   3
  -4 -12   9 11475.6 712.873   3
  -4 -12  10 2255.24 338.669   3
  -4 -12  11 69.3900 142.776   3
  -4 -12  12 5535.49 534.039   3
  -4 -11 -13-17.3565 84.1281   2
  -4 -11 -12 2655.92 253.666   2
  -4 -11 -11 4571.90 327.587   2
  -4 -11 -10 1829.27 210.556   2
  -4 -11  -9 143.251 55.6645   2
  -4 -11  -8 8983.04 448.154   2
  -4 -11  -7 17307.9 622.484   2
  -4 -11  -6 9277.75 456.019   2
  -4 -11  -5 2486.50 253.374   3
  -4 -11  -4 8157.97 455.422   3
  -4 -11  -3 15184.7 617.871   3
  -4 -11  -2 12613.0 561.335   3
  -4 -11  -1 5777.24 193.763   1
  -4 -11  -1 6204.58 405.403   3
  -4 -11   0 1368.10 90.7025   1
  -4 -11   0 1827.09 225.619   3
  -4 -11   1 28173.2 875.066   3
  -4 -11   2 35374.4 1000.71   3
  -4 -11   3 4950.36 384.675   3
  -4 -11   4 92.5358 72.1997   3
  -4 -11   5 9608.45 564.972   3
  -4 -11   6 17565.1 785.476   3
  -4 -11   7 11452.3 650.319   3
  -4 -11   8 57.1362 92.4371   3
  -4 -11   9 2146.85 292.541   3
  -4 -11  10 7332.39 562.446   3
  -4 -11  11 4630.92 462.626   3
  -4 -11  12 2110.77 320.088   3
  -4 -11  13 56.3432 182.792   3
  -4 -10 -13 3536.01 285.972   2
  -4 -10 -12 245.599 84.2334   2
  -4 -10 -11 2933.96 254.442   2
  -4 -10 -10 9572.98 445.313   2
  -4 -10  -9 9710.48 444.997   2
  -4 -10  -8 3299.70 262.372   2
  -4 -10  -7-16.0845 57.2628   2
  -4 -10  -6 6053.48 344.710   2
  -4 -10  -5 37902.4 909.162   3
  -4 -10  -4 7049.72 398.212   3
  -4 -10  -3 264.302 85.3827   3
  -4 -10  -2 16153.7 604.368   3
  -4 -10  -1 23987.2 745.358   3
  -4 -10  -1 20086.5 318.466   1
  -4 -10   0 12333.8 542.527   3
  -4 -10   1 1244.25 186.759   3
  -4 -10   2 2032.78 242.098   3
  -4 -10   3 12452.4 587.554   3
  -4 -10   4 18896.9 745.296   3
  -4 -10   5 10665.1 586.083   3
  -4 -10   6 202.036 83.6429   3
  -4 -10   7 7773.82 511.504   3
  -4 -10   8 10488.6 615.631   3
  -4 -10   9 3909.42 396.266   3
  -4 -10  10 172.498 125.736   3
  -4 -10  11 1850.20 303.195   3
  -4 -10  12 6223.63 539.012   3
  -4 -10  13 9033.74 674.609   3
  -4 -10  14 1777.20 324.071   3
  -4  -9 -14 69.3940 58.7219   2
  -4  -9 -13 4279.06 294.991   2
  -4  -9 -12 10947.6 460.428   2
  -4  -9 -11 6930.68 360.479   2
  -4  -9 -10 107.099 60.7066   2
  -4  -9  -9 6149.47 331.380   2
  -4  -9  -8 16149.6 530.288   2
  -4  -9  -7 20160.0 586.722   2
  -4  -9  -6 3862.55 263.096   2
  -4  -9  -5 207.592 82.0177   3
  -4  -9  -4 32155.3 796.151   3
  -4  -9  -3 16954.9 580.083   3
  -4  -9  -2 18430.3 610.703   3
  -4  -9  -1 9603.41 447.715   3
  -4  -9  -1 7397.13 153.578   1
  -4  -9   0 906.895 146.348   3
  -4  -9   1 17449.9 626.409   3
  -4  -9   2 16644.0 637.450   3
  -4  -9   3 894.864 165.076   3
  -4  -9   4 7219.68 442.736   3
  -4  -9   5 21289.3 780.787   3
  -4  -9   6 15427.0 685.821   3
  -4  -9   7 7669.77 502.584   3
  -4  -9   8-51.5962 117.809   3
  -4  -9   9 2998.81 325.570   3
  -4  -9  10 5365.07 457.626   3
  -4  -9  11 2604.61 341.423   3
  -4  -9  12 364.304 128.351   3
  -4  -9  13 192.088 142.064   3
  -4  -9  14 8357.75 661.342   3
  -4  -9  15 4180.45 488.921   3
  -4  -8 -14 6023.54 334.301   2
  -4  -8 -13 2363.33 200.826   2
  -4  -8 -12-67.3873 70.7594   2
  -4  -8 -11 9122.20 385.983   2
  -4  -8 -10 16792.7 511.434   2
  -4  -8  -9 13756.6 455.753   2
  -4  -8  -8 4513.83 260.801   2
  -4  -8  -7 581.195 93.0726   2
  -4  -8  -6 10179.9 388.461   2
  -4  -8  -5 16450.4 528.468   3
  -4  -8  -4 10726.3 435.913   3
  -4  -8  -3 5477.15 316.299   3
  -4  -8  -2 25105.6 669.804   3
  -4  -8  -1 30930.8 761.557   3
  -4  -8   0 22839.8 672.126   3
  -4  -8   1 3521.92 275.637   3
  -4  -8   2 1424.68 192.573   3
  -4  -8   3 11911.8 535.470   3
  -4  -8   4 17119.9 652.547   3
  -4  -8   5 10987.1 543.724   3
  -4  -8   6 514.158 121.648   3
  -4  -8   7 11411.5 592.725   3
  -4  -8   8 12318.3 634.952   3
  -4  -8   9 6143.22 466.192   3
  -4  -8  10 493.086 134.605   3
  -4  -8  11 4117.35 411.271   3
  -4  -8  12 4420.85 437.322   3
  -4  -8  13 1105.80 252.985   3
  -4  -8  14 302.525 135.707   3
  -4  -8  15 2604.18 369.278   3
  -4  -7 -14 156.410 45.4513   2
  -4  -7 -13 6565.23 316.944   2
  -4  -7 -12 7694.42 333.919   2
  -4  -7 -11 5774.68 281.889   2
  -4  -7 -10 2336.09 180.690   2
  -4  -7  -9 16413.6 456.875   2
  -4  -7  -8 20069.6 501.167   2
  -4  -7  -7 8295.16 319.410   2
  -4  -7  -5 4819.60 267.412   3
  -4  -7  -4 8781.04 362.025   3
  -4  -7  -3 19953.9 550.694   3
  -4  -7  -2 7448.04 343.043   3
  -4  -7  -1 1038.10 138.161   3
  -4  -7   0 10775.0 434.435   3
  -4  -7   1 35314.7 823.691   3
  -4  -7   2 20051.9 649.619   3
  -4  -7   3 283.222 97.4330   3
  -4  -7   4 11275.2 512.470   3
  -4  -7   5 15215.4 618.084   3
  -4  -7   6 3259.73 295.961   3
  -4  -7   7 2681.66 287.287   3
  -4  -7   8 4799.38 387.555   3
  -4  -7   9 7247.68 495.534   3
  -4  -7  10 6670.80 497.618   3
  -4  -7  11 680.820 160.231   3
  -4  -7  12 868.182 215.977   3
  -4  -7  13 2988.38 373.716   3
  -4  -7  14 2660.30 372.882   3
  -4  -7  15 1354.32 261.437   3
  -4  -7  16 194.661 101.054   3
  -4  -6 -14 5007.64 266.773   2
  -4  -6 -13 1053.61 120.698   2
  -4  -6 -12 2486.81 177.808   2
  -4  -6 -11 7462.03 289.630   2
  -4  -6 -10 9825.76 325.318   2
  -4  -6  -9 1783.67 137.572   2
  -4  -6  -8 299.019 64.7747   2
  -4  -6  -7 6704.74 260.842   2
  -4  -6  -6 17813.4 469.025   3
  -4  -6  -5 16705.2 464.841   3
  -4  -6  -4 3390.47 213.588   3
  -4  -6  -3 1657.08 151.808   3
  -4  -6  -2 12779.0 422.686   3
  -4  -6  -2 8495.07 141.902   1
  -4  -6  -1 11571.9 415.745   3
  -4  -6   0 2148.05 196.285   3
  -4  -6   1 4.72484 62.0338   3
  -4  -6   2 8854.29 412.089   3
  -4  -6   3 20740.4 654.847   3
  -4  -6   4 6181.37 373.611   3
  -4  -6   5 451.562 101.711   3
  -4  -6   6 9055.99 481.213   3
  -4  -6   7 2564.49 260.506   3
  -4  -6   8 7675.01 477.832   3
  -4  -6   9 613.601 116.685   3
  -4  -6  10 4999.14 423.353   3
  -4  -6  11 8175.58 570.661   3
  -4  -6  12 5716.52 487.312   3
  -4  -6  13 299.905 142.362   3
  -4  -6  14 1156.95 238.873   3
  -4  -6  15 3506.76 431.619   3
  -4  -6  16 4642.88 501.114   3
  -4  -5 -14 2430.63 172.726   2
  -4  -5 -13 6233.69 257.873   2
  -4  -5 -12 6797.02 261.625   2
  -4  -5 -12 7401.24 326.244   3
  -4  -5 -11 3481.68 180.988   2
  -4  -5 -10 663.783 79.6057   2
  -4  -5  -9 4266.51 184.789   2
  -4  -5  -8 14632.9 337.102   2
  -4  -5  -6 860.478 98.7057   3
  -4  -5  -5 6183.32 256.000   3
  -4  -5  -4 13439.8 477.990   4
  -4  -5  -4 13391.1 381.989   3
  -4  -5  -3 15119.1 275.130   1
  -4  -5  -3 14941.0 417.027   3
  -4  -5  -2 3181.01 201.308   3
  -4  -5  -1 1808.80 161.889   3
  -4  -5   0 14260.7 467.013   3
  -4  -5   1 14432.0 486.381   3
  -4  -5   2 975.163 149.192   3
  -4  -5   3 4541.53 300.160   3
  -4  -5   4 14794.8 560.100   3
  -4  -5   5 12024.7 527.343   3
  -4  -5   6 199.623 79.8031   3
  -4  -5   7 5025.55 363.728   3
  -4  -5   8 4103.26 354.074   3
  -4  -5   9 19261.3 792.208   3
  -4  -5  10 5489.73 451.842   3
  -4  -5  11-109.858 142.788   3
  -4  -5  12 3022.87 349.632   3
  -4  -5  13 8598.76 613.248   3
  -4  -5  14 4200.85 455.402   3
  -4  -5  15 511.446 168.252   3
  -4  -5  16 139.477 115.372   3
  -4  -4 -14 4915.56 223.507   2
  -4  -4 -13 841.836 88.4541   2
  -4  -4 -12 2185.79 162.186   3
  -4  -4 -12 2118.07 133.665   2
  -4  -4 -11 13611.8 309.566   2
  -4  -4 -11 14944.2 404.373   3
  -4  -4 -10 15007.3 386.245   3
  -4  -4 -10 13225.3 286.857   2
  -4  -4  -9 2466.60 119.514   2
  -4  -4  -6 17896.5 577.549   4
  -4  -4  -6 17295.4 370.714   3
  -4  -4  -5 7477.03 246.483   3
  -4  -4  -5 8075.29 370.213   4
  -4  -4  -4 2205.94 188.191   4
  -4  -4  -4 2178.62 142.854   3
  -4  -4  -4 2059.92 124.912   1
  -4  -4  -3 12169.1 259.026   1
  -4  -4  -3 11873.1 337.956   3
  -4  -4  -2 12624.3 370.365   3
  -4  -4  -1 2116.78 160.215   3
  -4  -4   0 3786.99 225.818   3
  -4  -4   1 8683.92 364.092   3
  -4  -4   2 41697.1 829.092   3
  -4  -4   3 27859.7 717.024   3
  -4  -4   4 340.350 95.1354   3
  -4  -4   5 19493.1 657.900   3
  -4  -4   6 31488.3 880.711   3
  -4  -4   7 14913.0 639.133   3
  -4  -4   8 122.608 80.5496   3
  -4  -4   9-80.1786 124.690   3
  -4  -4  10 6227.69 462.786   3
  -4  -4  11 12890.4 698.458   3
  -4  -4  12 3300.26 368.739   3
  -4  -4  13-91.8314 170.404   3
  -4  -4  14 774.687 148.973   3
  -4  -4  15 3113.61 402.532   3
  -4  -4  16 3637.50 443.939   3
  -4  -3 -14 3133.15 164.356   2
  -4  -3 -13 11041.6 286.386   2
  -4  -3 -13 12906.6 360.355   3
  -4  -3 -12 3948.28 186.337   3
  -4  -3 -12 3331.64 143.487   2
  -4  -3 -11 77.3553 22.2351   2
  -4  -3 -11 248.095 54.7439   3
  -4  -3 -10 1859.03 118.226   3
  -4  -3 -10 1426.28 75.1264   2
  -4  -3  -9 11657.9 275.651   3
  -4  -3  -9 7738.12 152.415   2
  -4  -3  -7 1267.00 84.0893   3
  -4  -3  -6 1203.32 83.9090   3
  -4  -3  -6 1162.66 150.202   4
  -4  -3  -6 1264.82 127.278   1
  -4  -3  -5 35404.5 460.073   3
  -4  -3  -5 36888.5 753.545   4
  -4  -3  -5 35435.4 596.240   1
  -4  -3  -4 39399.8 753.713   4
  -4  -3  -4 38937.9 563.031   1
  -4  -3  -4 39328.8 525.676   3
  -4  -3  -3 16432.6 320.377   1
  -4  -3  -3 16310.7 364.966   3
  -4  -3  -2 3719.65 190.207   3
  -4  -3  -1 35765.3 623.692   3
  -4  -3   0 54758.1 824.594   3
  -4  -3   1 5823.08 289.796   3
  -4  -3   2 366.864 70.5397   3
  -4  -3   3 18313.7 566.479   3
  -4  -3   4 20580.1 640.161   3
  -4  -3   5 14759.3 578.870   3
  -4  -3   6 2274.52 236.458   3
  -4  -3   7 3607.77 306.300   3
  -4  -3   8 17575.3 710.563   3
  -4  -3   9 14053.5 671.611   3
  -4  -3  10 4283.12 380.244   3
  -4  -3  11-164.469 171.210   3
  -4  -3  12 4710.98 425.959   3
  -4  -3  13 3081.47 360.609   3
  -4  -3  14 2609.43 357.093   3
  -4  -3  15 478.021 154.438   3
  -4  -2 -14 328.565 47.6858   2
  -4  -2 -13 19.1273 31.1200   2
  -4  -2 -13 81.3622 29.8617   3
  -4  -2 -12 5992.04 202.630   3
  -4  -2 -12 4811.63 150.156   2
  -4  -2 -11 7769.21 207.203   3
  -4  -2 -11 5369.32 126.751   2
  -4  -2 -10 4722.34 143.290   3
  -4  -2  -9 3.97400 14.4067   3
  -4  -2  -8 4911.66 108.709   3
  -4  -2  -8 5451.89 121.179   3
  -4  -2  -7 8153.92 148.570   3
  -4  -2  -7 7834.78 134.338   3
  -4  -2  -6 6269.39 137.374   3
  -4  -2  -6 8558.99 371.588   4
  -4  -2  -6 7880.12 314.392   1
  -4  -2  -5 3635.34 121.643   3
  -4  -2  -5 3679.41 198.925   1
  -4  -2  -5 3845.23 237.913   4
  -4  -2  -4 4559.83 202.646   1
  -4  -2  -4 4697.05 159.883   3
  -4  -2  -4 4541.62 243.556   4
  -4  -2  -3 52193.0 594.370   3
  -4  -2  -2 47223.9 631.688   3
  -4  -2  -1 4726.98 219.065   3
  -4  -2   0 1704.27 141.599   3
  -4  -2   1 33133.2 675.144   3
  -4  -2   2 27499.1 665.718   3
  -4  -2   3 33526.1 780.330   3
  -4  -2   4 4119.66 285.870   3
  -4  -2   5 5528.70 347.690   3
  -4  -2   6 15869.6 618.333   3
  -4  -2   7 8659.80 481.287   3
  -4  -2   8 1237.36 188.513   3
  -4  -2   9 33.9796 108.364   3
  -4  -2  10 2038.59 262.047   3
  -4  -2  11 7331.45 508.435   3
  -4  -2  12 4764.39 423.790   3
  -4  -2  13-294.163 202.188   3
  -4  -1 -14 5140.16 189.815   2
  -4  -1 -13 1694.75 96.5925   2
  -4  -1 -13 1666.97 102.583   3
  -4  -1 -12 4161.33 138.794   3
  -4  -1 -12 3409.48 112.340   2
  -4  -1 -12 3439.41 112.658   2
  -4  -1 -11 808.450 49.2068   3
  -4  -1  -8 9117.99 394.841   1
  -4  -1  -7 4446.11 257.439   1
  -4  -1  -6 19939.0 535.208   4
  -4  -1  -6 19814.6 509.924   1
  -4  -1  -5 41986.2 693.022   1
  -4  -1  -5 42830.4 747.413   4
  -4  -1  -4 27174.9 566.506   4
  -4  -1  -4 25898.1 329.766   3
  -4  -1  -3 5107.87 182.181   3
  -4  -1  -2 5439.40 209.497   3
  -4  -1  -1 46982.8 685.826   3
  -4  -1   0 39821.6 689.306   3
  -4  -1   1 16490.6 476.319   3
  -4  -1   2 3592.43 238.046   3
  -4  -1   3 29173.2 727.970   3
  -4  -1   4 42034.9 914.616   3
  -4  -1   5 22246.7 699.096   3
  -4  -1   6 4408.29 325.076   3
  -4  -1   7 3734.19 308.747   3
  -4  -1   8 12493.3 593.489   3
  -4  -1   9 21779.6 824.354   3
  -4  -1  10 4909.55 402.746   3
  -4  -1  11 665.433 140.203   3
  -4   0 -14-105.336 49.3943   2
  -4   0 -13 5618.86 182.610   2
  -4   0 -13 5608.69 166.758   3
  -4   0 -13 5738.71 178.985   2
  -4   0 -12 4955.51 137.876   2
  -4   0 -12 4745.80 140.842   2
  -4   0  -7 13767.7 467.979   1
  -4   0  -6 10717.8 390.954   1
  -4   0  -6 10559.8 375.860   4
  -4   0  -5 742.991 101.562   1
  -4   0  -5 769.643 107.372   4
  -4   0  -4 12665.5 366.619   4
  -4   0  -1 8055.94 287.656   3
  -4   0   0 6879.53 284.708   3
  -4   0   1 21506.1 544.682   3
  -4   0   2 19235.4 548.876   3
  -4   0   3 10479.3 429.564   3
  -4   0   4 409.336 69.2751   3
  -4   0   5 8980.38 442.992   3
  -4   0   6 5103.01 354.228   3
  -4   0   7 7045.53 431.804   3
  -4   0   8 222.599 71.0919   3
  -4   0   9 1082.86 174.407   3
  -4   1 -14 9231.44 276.022   2
  -4   1 -13 2797.25 134.271   2
  -4   1 -13 2799.06 139.969   2
  -4   1 -12 744.008 61.1939   2
  -4   1 -12 658.467 62.3029   2
  -4   1 -11 2450.72 97.2694   2
  -4   1 -11 2529.09 99.4501   2
  -4   1  -7 13827.6 479.230   1
  -4   1  -6 33185.1 706.194   1
  -4   1  -5 32973.8 593.462   4
  -4   1  -4 29371.4 522.508   4
  -4   2 -14 2605.00 160.358   2
  -4   2 -13 12584.4 327.628   2
  -4   2 -12 12020.0 299.469   2
  -4   2 -12 12526.6 290.519   2
  -4   2 -11 6615.90 205.392   2
  -4   2 -11 6409.98 190.456   2
  -4   2 -10 308.649 41.2621   2
  -4   2  -9 1503.07 79.1617   2
  -4   2  -8 16687.5 251.069   2
  -4   2  -7 21893.8 297.354   2
  -4   2  -6 9687.93 216.701   2
  -4   2  -5 558.592 61.1257   2
  -4   2  -5 708.332 87.1515   4
  -4   2  -4 11075.6 283.317   2
  -4   2  -4 11408.5 304.835   4
  -4   2  -3 36060.8 556.249   2
  -4   2  -2 8544.59 296.367   2
  -4   2  -1 9031.14 323.251   2
  -4   3 -14 14060.7 403.724   2
  -4   3 -12 229.442 54.5914   2
  -4   3 -11 6418.36 224.322   2
  -4   3 -10 26740.2 435.958   2
  -4   3  -9 17985.5 345.319   2
  -4   3  -8 2017.11 116.480   2
  -4   3  -7 7619.31 223.999   2
  -4   3  -6 17862.1 356.680   2
  -4   3  -5 14866.8 349.123   4
  -4   3  -5 14251.0 340.056   2
  -4   3  -4 14711.1 367.519   2
  -4   3  -3 2492.91 166.420   2
  -4   3  -2 8122.68 310.512   2
  -4   3  -1 77725.1 1004.63   2
  -4   3   0 3908.85 241.615   2
  -4   3   1 1551.22 162.736   2
  -4   3   2 5336.79 307.783   2
  -4   4 -12 7142.81 276.647   2
  -4   4 -11 759.329 96.8586   2
  -4   4 -10 17.5809 38.1602   2
  -4   4  -9 5248.59 216.634   2
  -4   4  -8 18794.1 407.839   2
  -4   4  -7 8573.87 275.514   2
  -4   4  -6 2992.55 173.363   2
  -4   4  -5 6262.57 259.235   2
  -4   4  -5 6517.88 205.751   4
  -4   4  -4 22282.1 494.600   2
  -4   4  -3 9288.50 340.416   2
  -4   4  -2 8315.83 334.171   2
  -4   4  -1 42502.1 798.371   2
  -4   4   0 70925.4 1069.52   2
  -4   4   1 2755.55 221.730   2
  -4   4   2 1916.77 198.135   2
  -4   5 -11 1594.73 146.226   2
  -4   5 -10 7414.92 298.477   2
  -4   5  -9 3853.80 212.317   2
  -4   5  -8 59.1422 43.2391   2
  -4   5  -7 17842.8 452.386   2
  -4   5  -6 10288.9 353.024   2
  -4   5  -5 3108.58 202.140   2
  -4   5  -5 2719.41 115.141   4
  -4   5  -4 217.682 66.3167   2
  -4   5  -3 1499.94 152.475   2
  -4   5  -2 6046.39 310.456   2
  -4   5  -1 13568.6 469.748   2
  -4   5   0 2159.15 203.408   2
  -4   5   1 10252.5 448.815   2
  -4   6 -11 490.997 99.1248   2
  -4   6 -10 1010.94 122.754   2
  -4   6  -9 8872.85 349.909   2
  -4   6  -8 11179.6 396.460   2
  -4   6  -7 4771.01 259.354   2
  -4   6  -6 3417.14 226.151   2
  -4   6  -5 11954.3 425.204   2
  -4   6  -4 14328.1 475.799   2
  -4   6  -3 7352.74 351.868   2
  -4   6  -2 67.6599 56.1552   2
  -4   6  -1 7139.33 366.180   2
  -4   6   0 13327.0 511.640   2
  -4   7 -10 4850.50 287.057   2
  -4   7  -9 342.624 86.0825   2
  -4   7  -8 2641.77 218.152   2
  -4   7  -7 7068.33 343.111   2
  -4   7  -6 12502.3 456.727   2
  -4   7  -6 9186.92 182.714   4
  -4   7  -5 265.830 75.8154   2
  -4   7  -4 1999.66 197.947   2
  -4   7  -3 13681.9 506.400   2
  -3 -18  -7 2104.41 323.807   2
  -3 -18  -6-105.654 152.336   3
  -3 -18  -5 506.512 104.686   3
  -3 -18  -4 5313.30 511.503   3
  -3 -18  -3 2792.39 373.255   3
  -3 -18  -2-67.7016 156.608   3
  -3 -18  -1 1703.13 296.403   3
  -3 -18   0 6673.07 558.996   3
  -3 -18   1 6955.07 574.792   3
  -3 -18   2 2619.80 371.543   3
  -3 -17 -11 761.077 204.574   2
  -3 -17 -10 1163.15 228.251   2
  -3 -17  -9 417.184 159.805   2
  -3 -17  -8 507.405 169.749   2
  -3 -17  -7 2975.06 365.296   2
  -3 -17  -6 4643.88 442.299   2
  -3 -17  -5 1365.21 253.044   3
  -3 -17  -4-310.791 197.113   3
  -3 -17  -3 2929.59 365.494   3
  -3 -17  -2 4977.90 467.173   3
  -3 -17  -1 4715.97 455.247   3
  -3 -17   0 378.121 167.673   3
  -3 -17   1 1546.61 265.707   3
  -3 -17   2 7018.01 566.430   3
  -3 -17   3 9895.61 678.928   3
  -3 -17   4 4216.70 453.989   3
  -3 -17   5 114.360 94.6809   3
  -3 -17   6 6287.87 561.321   3
  -3 -16 -12 1094.92 235.743   2
  -3 -16 -11-2.14016 102.504   2
  -3 -16 -10 232.321 148.510   2
  -3 -16  -9 2781.46 333.903   2
  -3 -16  -8 4221.75 418.886   2
  -3 -16  -7 1466.97 248.279   2
  -3 -16  -6 306.307 122.328   2
  -3 -16  -5 4985.40 437.972   2
  -3 -16  -4 8047.04 571.667   3
  -3 -16  -3 5222.07 465.870   3
  -3 -16  -2 96.3270 119.518   3
  -3 -16  -1 2209.05 311.406   3
  -3 -16   0 8398.29 578.444   3
  -3 -16   1 7492.14 555.716   3
  -3 -16   2 1977.56 276.911   3
  -3 -16   3 510.143 166.818   3
  -3 -16   4 6437.23 529.789   3
  -3 -16   5 9721.87 652.138   3
  -3 -16   6 3666.35 430.442   3
  -3 -16   7-14.3175 113.936   3
  -3 -16   8 4142.91 465.321   3
  -3 -15 -13-315.877 162.244   2
  -3 -15 -12 3151.91 351.511   2
  -3 -15 -11 5275.18 455.012   2
  -3 -15 -10 1203.57 210.319   2
  -3 -15  -9 13.2608 85.6712   2
  -3 -15  -8 2139.29 284.703   2
  -3 -15  -7 4949.65 417.627   2
  -3 -15  -6 4965.98 421.604   2
  -3 -15  -5 1605.37 243.275   2
  -3 -15  -4 48.0596 82.0611   3
  -3 -15  -3 5359.34 438.528   3
  -3 -15  -2 11109.9 638.760   3
  -3 -15  -1 7556.25 528.826   3
  -3 -15   0 498.647 161.898   3
  -3 -15   0 48.4995 64.7801   1
  -3 -15   1 3867.29 259.089   1
  -3 -15   1 4666.18 422.690   3
  -3 -15   2 7512.91 360.406   1
  -3 -15   2 7830.06 541.315   3
  -3 -15   3 7769.08 546.467   3
  -3 -15   4 1037.09 196.522   3
  -3 -15   5 206.310 120.969   3
  -3 -15   6 5661.31 500.733   3
  -3 -15   7 4730.56 454.313   3
  -3 -15   8 2553.12 351.517   3
  -3 -15   9 572.697 170.039   3
  -3 -15  10 1694.40 292.549   3
  -3 -14 -14 3294.69 363.359   2
  -3 -14 -13 3700.24 381.752   2
  -3 -14 -12 791.812 169.932   2
  -3 -14 -11 162.384 88.8897   2
  -3 -14 -10 3403.08 338.102   2
  -3 -14  -9 4551.17 388.461   2
  -3 -14  -8 4665.39 388.087   2
  -3 -14  -7 817.704 184.858   2
  -3 -14  -6 3584.63 335.931   2
  -3 -14  -5 7555.22 484.906   2
  -3 -14  -4 8347.62 512.836   2
  -3 -14  -3 3129.74 322.281   3
  -3 -14  -2 180.852 96.9903   3
  -3 -14  -1 9339.56 562.468   3
  -3 -14   0 15892.7 732.665   3
  -3 -14   0 14432.0 479.193   1
  -3 -14   1 6609.90 473.040   3
  -3 -14   1 6001.75 301.459   1
  -3 -14   2 22.7103 67.2575   1
  -3 -14   2 132.925 89.1031   3
  -3 -14   3 2470.23 302.506   3
  -3 -14   4 7158.50 512.052   3
  -3 -14   5 4341.61 410.747   3
  -3 -14   6 856.156 179.420   3
  -3 -14   7 2089.23 309.832   3
  -3 -14   8 5639.10 505.496   3
  -3 -14   9 8564.12 628.110   3
  -3 -14  10 1017.76 236.473   3
  -3 -14  11 44.7727 133.253   3
  -3 -13 -14 188.483 90.6294   2
  -3 -13 -13 53.6070 102.811   2
  -3 -13 -12 1286.39 204.217   2
  -3 -13 -11 3747.74 345.704   2
  -3 -13 -10 2265.99 274.421   2
  -3 -13  -9-191.241 120.896   2
  -3 -13  -8 2315.03 258.164   2
  -3 -13  -7 9833.02 530.382   2
  -3 -13  -6 13304.7 617.090   2
  -3 -13  -5 313.515 109.309   2
  -3 -13  -4 1004.41 179.585   2
  -3 -13  -3 10241.4 561.422   3
  -3 -13  -2 8226.56 500.208   3
  -3 -13  -1 1925.91 244.902   3
  -3 -13   0 605.774 163.001   3
  -3 -13   0 553.555 74.2256   1
  -3 -13   1 7434.99 317.468   1
  -3 -13   1 7690.79 490.721   3
  -3 -13   2 8415.30 522.059   3
  -3 -13   2 7989.88 333.641   1
  -3 -13   3 4607.17 396.902   3
  -3 -13   4-51.4549 85.4824   3
  -3 -13   5 3726.26 366.487   3
  -3 -13   6 5909.04 478.015   3
  -3 -13   7 2217.45 315.246   3
  -3 -13   8 327.089 105.466   3
  -3 -13   9 2014.70 311.822   3
  -3 -13  10 5628.19 502.856   3
  -3 -13  11 2360.61 335.939   3
  -3 -13  12 387.616 168.317   3
  -3 -13  13 570.854 195.820   3
  -3 -12 -14 4260.06 374.756   2
  -3 -12 -13 5453.56 418.070   2
  -3 -12 -12 988.134 176.148   2
  -3 -12 -11 461.491 124.226   2
  -3 -12 -10 4617.35 364.488   2
  -3 -12  -9 6628.63 425.382   2
  -3 -12  -8 3475.69 309.151   2
  -3 -12  -7 324.335 99.3299   2
  -3 -12  -6 5105.76 360.785   2
  -3 -12  -5 21643.3 736.614   2
  -3 -12  -4 3054.36 280.513   2
  -3 -12  -3 353.273 111.126   3
  -3 -12  -3-6.15799 83.8533   2
  -3 -12  -2 2135.71 232.493   3
  -3 -12  -1 11687.3 568.377   3
  -3 -12   0 17694.9 458.417   1
  -3 -12   0 18129.3 709.846   3
  -3 -12   1 5557.40 405.640   3
  -3 -12   1 5529.59 252.357   1
  -3 -12   2 6646.24 441.787   3
  -3 -12   2 6236.06 270.647   1
  -3 -12   3 16807.8 707.671   3
  -3 -12   4 11701.7 601.672   3
  -3 -12   5 944.826 185.296   3
  -3 -12   6 527.461 146.028   3
  -3 -12   7 3065.08 334.034   3
  -3 -12   8 6779.70 506.990   3
  -3 -12   9 2977.11 342.311   3
  -3 -12  10-68.3836 126.124   3
  -3 -12  11 3997.86 438.708   3
  -3 -12  12 7240.75 579.221   3
  -3 -12  13 7501.67 609.531   3
  -3 -12  14 1016.11 234.195   3
  -3 -11 -15 1071.22 194.390   2
  -3 -11 -14 149.308 87.5870   2
  -3 -11 -13 616.240 155.032   2
  -3 -11 -12 4771.05 359.860   2
  -3 -11 -11 4218.50 334.282   2
  -3 -11 -10 1070.20 166.402   2
  -3 -11  -9 167.238 72.7266   2
  -3 -11  -8 5570.27 360.602   2
  -3 -11  -7 9362.17 465.568   2
  -3 -11  -6 6039.88 379.069   2
  -3 -11  -5 192.163 90.1368   2
  -3 -11  -4 12099.4 527.851   2
  -3 -11  -3 18581.7 649.809   2
  -3 -11  -2 5773.22 380.990   3
  -3 -11  -1 479.931 125.194   3
  -3 -11   0 6446.78 404.768   3
  -3 -11   0 6047.97 249.762   1
  -3 -11   1 7497.18 275.662   1
  -3 -11   1 7894.86 455.193   3
  -3 -11   2 2049.19 142.894   1
  -3 -11   2 2155.64 236.457   3
  -3 -11   3 1845.00 236.479   3
  -3 -11   4 7329.19 459.553   3
  -3 -11   5 16253.5 703.422   3
  -3 -11   6 18908.9 779.966   3
  -3 -11   7 3222.69 332.100   3
  -3 -11   8 1093.40 197.888   3
  -3 -11   9 9616.20 607.879   3
  -3 -11  10 10159.2 640.634   3
  -3 -11  11 4774.73 446.750   3
  -3 -11  12 259.447 103.657   3
  -3 -11  13 2521.15 360.020   3
  -3 -11  14 10293.8 724.655   3
  -3 -10 -15 1524.98 208.694   2
  -3 -10 -14 3558.49 311.240   2
  -3 -10 -13 2886.62 281.697   2
  -3 -10 -12 314.177 99.8181   2
  -3 -10 -11 4062.12 306.850   2
  -3 -10 -10 6894.04 392.337   2
  -3 -10  -9 7459.56 401.855   2
  -3 -10  -8 6141.92 363.410   2
  -3 -10  -7 322.504 85.7654   2
  -3 -10  -6 2355.64 222.391   2
  -3 -10  -5 12722.4 507.811   2
  -3 -10  -4 3895.24 280.642   2
  -3 -10  -3 2395.79 220.671   2
  -3 -10  -2 8749.80 438.123   3
  -3 -10  -1 9660.83 472.930   3
  -3 -10   0 5702.78 367.026   3
  -3 -10   1 3865.49 305.063   3
  -3 -10   1 3719.90 175.385   1
  -3 -10   2 1940.18 225.329   3
  -3 -10   3 17205.0 660.654   3
  -3 -10   4 8476.16 483.983   3
  -3 -10   5 464.214 107.332   3
  -3 -10   6 108.094 89.0468   3
  -3 -10   7 11943.1 611.974   3
  -3 -10   8 12121.9 638.923   3
  -3 -10   9 4943.59 423.072   3
  -3 -10  10 131.709 94.8462   3
  -3 -10  11 5693.15 473.328   3
  -3 -10  12 8404.34 603.454   3
  -3 -10  13 6661.17 552.974   3
  -3 -10  14 2397.88 346.092   3
  -3 -10  15 311.098 165.714   3
  -3  -9 -15 778.414 149.160   2
  -3  -9 -14-7.71472 72.8397   2
  -3  -9 -13 1839.38 206.529   2
  -3  -9 -12 3421.43 277.249   2
  -3  -9 -11 3952.55 291.293   2
  -3  -9 -10 471.482 99.8340   2
  -3  -9  -9 10506.2 452.806   2
  -3  -9  -8 10765.1 445.078   2
  -3  -9  -7 4810.83 301.197   2
  -3  -9  -6 223.314 78.2512   2
  -3  -9  -5 5241.11 307.768   2
  -3  -9  -4 25829.4 673.147   2
  -3  -9  -3 18262.5 568.646   2
  -3  -9  -2 3603.60 265.944   3
  -3  -9  -1 3288.16 264.366   3
  -3  -9   0 21991.6 674.103   3
  -3  -9   1 31240.9 458.037   1
  -3  -9   1 32338.5 826.758   3
  -3  -9   2 13741.6 557.376   3
  -3  -9   3 98.0149 54.3319   3
  -3  -9   4 20456.1 710.831   3
  -3  -9   5 34015.0 944.210   3
  -3  -9   6 19608.0 739.926   3
  -3  -9   7 18740.9 736.624   3
  -3  -9   8 958.329 182.276   3
  -3  -9   9 10645.4 599.293   3
  -3  -9  10 16083.0 751.220   3
  -3  -9  11 7788.86 547.344   3
  -3  -9  12 160.781 108.174   3
  -3  -9  13 2980.57 368.819   3
  -3  -9  14 11247.2 735.773   3
  -3  -9  15 5915.05 548.516   3
  -3  -9  16 12.6275 132.798   3
  -3  -8 -15 3799.89 300.817   2
  -3  -8 -14 3418.29 272.142   2
  -3  -8 -13 223.362 82.9741   2
  -3  -8 -12 949.673 141.338   2
  -3  -8 -11 4418.10 288.434   2
  -3  -8 -10 9793.52 419.625   2
  -3  -8  -9 3697.13 253.408   2
  -3  -8  -8 263.543 80.0644   2
  -3  -8  -7 5350.33 292.271   2
  -3  -8  -6 10592.2 410.856   2
  -3  -8  -5 10636.0 407.587   2
  -3  -8  -4 3108.25 226.817   2
  -3  -8  -3 21709.7 581.368   2
  -3  -8  -2 33432.3 763.415   3
  -3  -8  -1 34613.0 789.179   3
  -3  -8   0 12272.4 475.365   3
  -3  -8   0 11511.1 247.350   1
  -3  -8   1 1538.24 178.351   3
  -3  -8   1 1347.85 82.3711   1
  -3  -8   2 19897.9 634.556   3
  -3  -8   3 29723.6 797.158   3
  -3  -8   4 18382.5 651.791   3
  -3  -8   5 2725.05 260.408   3
  -3  -8   6 2092.59 236.038   3
  -3  -8   7 5633.46 392.729   3
  -3  -8   8 30829.2 955.645   3
  -3  -8   9 6711.58 456.202   3
  -3  -8  10 764.348 179.013   3
  -3  -8  11 11320.6 643.161   3
  -3  -8  12 6036.58 481.743   3
  -3  -8  13 876.761 204.022   3
  -3  -8  14 53.4301 107.087   3
  -3  -8  15 1796.08 294.112   3
  -3  -8  16 2421.44 357.503   3
  -3  -7 -15 117.150 52.9030   2
  -3  -7 -14 1918.51 206.946   2
  -3  -7 -13 6367.03 347.312   2
  -3  -7 -12 5710.35 319.936   2
  -3  -7 -11 30.7535 45.4090   2
  -3  -7 -10 8146.42 354.310   2
  -3  -7  -9 29786.3 667.652   2
  -3  -7  -8 21370.1 549.138   2
  -3  -7  -7 2590.88 189.416   2
  -3  -7  -6 1930.85 163.704   2
  -3  -7  -5 26670.9 595.309   2
  -3  -7  -4 45017.0 768.620   2
  -3  -7  -2 464.259 102.558   3
  -3  -7  -1 9847.63 398.097   3
  -3  -7   0 15977.2 512.427   3
  -3  -7   0 14225.8 227.578   1
  -3  -7   1 57282.6 1000.21   3
  -3  -7   2 21788.0 632.172   3
  -3  -7   3 125.249 75.0534   3
  -3  -7   4 12353.9 517.244   3
  -3  -7   5 27513.6 787.546   3
  -3  -7   6 12252.6 547.306   3
  -3  -7   7 60.4523 63.1641   3
  -3  -7   8 2097.81 239.340   3
  -3  -7   9 21386.3 805.911   3
  -3  -7  10 14156.7 678.767   3
  -3  -7  11 1576.87 243.777   3
  -3  -7  12 877.276 194.471   3
  -3  -7  13 3509.02 390.457   3
  -3  -7  14 3502.45 399.538   3
  -3  -7  15 2328.19 332.574   3
  -3  -7  16 5.36306 163.386   3
  -3  -7  17 2575.74 392.095   3
  -3  -6 -15 7149.09 375.971   2
  -3  -6 -14 2035.25 197.148   2
  -3  -6 -13 475.086 89.7026   2
  -3  -6 -12 4076.95 255.093   2
  -3  -6 -11 6581.13 312.208   2
  -3  -6 -10 10200.6 370.407   2
  -3  -6  -9 2703.54 186.037   2
  -3  -6  -8 1814.92 153.789   2
  -3  -6  -7 27735.1 558.814   2
  -3  -6  -6 51766.0 755.257   2
  -3  -6  -5 18541.6 453.592   2
  -3  -6  -5 19077.9 593.371   4
  -3  -6  -4 518.853 107.232   4
  -3  -6  -4 533.569 92.4876   2
  -3  -6  -3 20265.8 506.618   3
  -3  -6  -3 21069.6 576.965   4
  -3  -6  -2 22431.2 547.379   3
  -3  -6  -1 17075.9 483.683   3
  -3  -6   0 825.948 127.374   3
  -3  -6   1 2882.60 216.626   3
  -3  -6   2 48680.1 907.669   3
  -3  -6   3 36908.8 826.887   3
  -3  -6   4 3928.96 286.284   3
  -3  -6   5 1652.14 189.843   3
  -3  -6   6 9875.55 479.181   3
  -3  -6   7 10578.9 512.195   3
  -3  -6   8 3954.50 323.771   3
  -3  -6   9 44.8648 118.235   3
  -3  -6  10 6316.49 449.853   3
  -3  -6  11 14740.4 716.734   3
  -3  -6  12 3841.93 389.733   3
  -3  -6  13-149.412 143.755   3
  -3  -6  14 2256.23 316.815   3
  -3  -6  15 3620.35 412.541   3
  -3  -6  16 4182.06 468.479   3
  -3  -6  17 554.078 182.792   3
  -3  -5 -16 714.700 117.350   2
  -3  -5 -15 785.264 127.439   2
  -3  -5 -14 7100.69 343.417   2
  -3  -5 -13 20192.7 630.086   3
  -3  -5 -13 18816.8 535.638   2
  -3  -5 -12 21008.6 607.182   3
  -3  -5 -12 21454.3 547.092   2
  -3  -5 -11 2397.68 174.579   2
  -3  -5 -11 2325.36 197.988   3
  -3  -5 -10 6544.83 276.815   2
  -3  -5  -9 35437.5 612.580   2
  -3  -5  -8 23071.7 474.342   2
  -3  -5  -7 5312.05 223.694   2
  -3  -5  -6 75.9550 48.7151   2
  -3  -5  -6 100.807 92.3455   4
  -3  -5  -5 28944.7 705.692   4
  -3  -5  -5 27522.6 494.628   2
  -3  -5  -4 66121.5 768.258   2
  -3  -5  -4 67520.0 1018.97   4
  -3  -5  -3 45717.8 700.434   3
  -3  -5  -3 46234.6 811.455   4
  -3  -5  -2 1367.44 130.835   3
  -3  -5  -1 12708.5 387.715   3
  -3  -5   0 37296.5 694.804   3
  -3  -5   1 8362.24 346.298   3
  -3  -5   2 5249.28 291.084   3
  -3  -5   3 6434.28 327.286   3
  -3  -5   4 38416.6 835.371   3
  -3  -5   5 20322.5 639.134   3
  -3  -5   6 1357.53 171.149   3
  -3  -5   7 4975.56 348.213   3
  -3  -5   8 5381.63 368.883   3
  -3  -5   9 14762.4 652.843   3
  -3  -5  10 2896.81 302.643   3
  -3  -5  11-43.8673 148.283   3
  -3  -5  12 3751.15 374.910   3
  -3  -5  13 6861.76 516.922   3
  -3  -5  14 1814.36 273.499   3
  -3  -5  15-162.726 174.136   3
  -3  -5  16 1181.50 263.845   3
  -3  -5  17 2614.62 368.476   3
  -3  -5  18 2330.99 361.560   3
  -3  -4 -16 6101.00 336.593   2
  -3  -4 -15 4982.76 288.634   2
  -3  -4 -14 705.146 108.473   2
  -3  -4 -13 684.490 110.417   3
  -3  -4 -13 731.724 99.7640   2
  -3  -4 -12 13490.5 411.275   2
  -3  -4 -12 14409.2 478.852   3
  -3  -4 -11 22919.9 570.100   3
  -3  -4 -11 21474.3 485.681   2
  -3  -4 -10 12659.1 404.950   3
  -3  -4 -10 12147.7 346.706   2
  -3  -4  -9 552.871 67.3870   2
  -3  -4  -8 6224.65 220.817   2
  -3  -4  -7 27074.9 438.707   2
  -3  -4  -6 59411.3 629.137   2
  -3  -4  -5 7316.92 339.599   4
  -3  -4  -5 6887.35 215.676   2
  -3  -4  -4 16152.6 476.798   4
  -3  -4  -3 80436.5 844.917   3
  -3  -4  -3 83615.6 1047.40   4
  -3  -4  -2 30830.8 536.426   3
  -3  -4  -1 1603.08 134.270   3
  -3  -4   0 5238.35 248.809   3
  -3  -4   1 32186.9 645.174   3
  -3  -4   2 11397.1 402.306   3
  -3  -4   3 5649.92 297.311   3
  -3  -4   4-11.2915 74.1959   3
  -3  -4   5 7986.64 389.816   3
  -3  -4   6 12375.2 509.033   3
  -3  -4   7 10780.2 505.086   3
  -3  -4   8 443.457 112.594   3
  -3  -4   9 5257.02 382.059   3
  -3  -4  10 20582.3 797.405   3
  -3  -4  11 7744.59 507.013   3
  -3  -4  12-235.604 167.408   3
  -3  -4  13 966.965 172.032   3
  -3  -4  14 5183.38 461.243   3
  -3  -4  15 5007.95 465.082   3
  -3  -4  16 1732.28 271.813   3
  -3  -4  17-116.927 149.480   3
  -3  -3 -16 1073.29 133.899   2
  -3  -3 -15 357.505 79.7906   2
  -3  -3 -14 6789.97 314.946   2
  -3  -3 -13 9870.20 382.929   3
  -3  -3 -13 9465.46 349.254   2
  -3  -3 -12 11808.0 363.896   2
  -3  -3 -12 12331.7 409.295   3
  -3  -3 -11 57.6516 36.5343   2
  -3  -3 -11 59.9325 40.9980   3
  -3  -3 -10 13624.8 339.238   2
  -3  -3 -10 14072.7 393.526   3
  -3  -3  -9 28602.3 522.276   3
  -3  -3  -9 28681.9 450.165   2
  -3  -3  -8 12386.3 272.159   2
  -3  -3  -7 16.9242 25.3120   2
  -3  -3  -6 1129.68 75.1432   2
  -3  -3  -5 37161.2 725.943   4
  -3  -3  -4 15550.0 313.713   3
  -3  -3  -4 16297.0 461.629   4
  -3  -3  -3 4751.79 239.895   4
  -3  -3  -3 4866.99 183.916   3
  -3  -3  -2 2772.77 150.941   3
  -3  -3  -2 2844.19 106.979   1
  -3  -3  -1 23299.8 451.818   3
  -3  -3   0 19705.3 447.680   3
  -3  -3   1 5849.65 266.873   3
  -3  -3   2 322.838 79.2317   3
  -3  -3   3 5814.87 292.673   3
  -3  -3   4 24568.9 636.251   3
  -3  -3   5 12487.0 481.262   3
  -3  -3   6 17.6646 67.4159   3
  -3  -3   7 13554.8 557.335   3
  -3  -3   8 14485.9 611.110   3
  -3  -3   9 4102.56 338.006   3
  -3  -3  10 17.1100 82.7003   3
  -3  -3  11 776.606 147.229   3
  -3  -3  12 5836.62 451.298   3
  -3  -3  13 4605.01 417.323   3
  -3  -3  14 2385.87 311.118   3
  -3  -3  15 307.278 94.8411   3
  -3  -3  16 6286.73 541.719   3
  -3  -2 -16 8060.37 373.092   2
  -3  -2 -15 4830.04 272.336   2
  -3  -2 -14 1263.81 132.066   2
  -3  -2 -14 1459.15 148.733   3
  -3  -2 -13 438.243 67.8581   2
  -3  -2 -13 762.341 108.128   3
  -3  -2 -12 6347.90 261.925   2
  -3  -2 -12 7395.53 293.279   3
  -3  -2 -11 15227.9 368.644   2
  -3  -2 -11 15763.8 397.835   3
  -3  -2 -10 7995.74 240.472   2
  -3  -2 -10 8640.35 277.539   3
  -3  -2  -9-2.74750 25.5560   2
  -3  -2  -9 21.7209 28.9592   3
  -3  -2  -8 7553.36 183.793   2
  -3  -2  -8 8438.78 232.892   3
  -3  -2  -7 9076.83 170.491   2
  -3  -2  -6 1753.42 67.4050   2
  -3  -2  -5 2320.74 97.7146   3
  -3  -2  -4 12118.3 224.079   3
  -3  -2  -4 12883.1 387.670   4
  -3  -2  -4 12671.3 318.089   1
  -3  -2  -3 9701.42 323.102   4
  -3  -2  -3 9793.70 219.461   3
  -3  -2  -3 9576.63 248.012   1
  -3  -2  -2 5937.45 191.051   3
  -3  -2  -1-3.17452 30.7527   3
  -3  -2   0 4321.58 199.119   3
  -3  -2   1 26807.6 540.354   3
  -3  -2   2 18155.7 476.487   3
  -3  -2   3 3672.99 231.579   3
  -3  -2   4 2536.18 197.085   3
  -3  -2   5 8166.08 392.435   3
  -3  -2   6 4697.53 312.430   3
  -3  -2   7 12620.8 536.231   3
  -3  -2   8 2021.81 231.574   3
  -3  -2   9 7606.82 457.036   3
  -3  -2  10 25272.4 862.286   3
  -3  -2  11 20160.8 800.082   3
  -3  -2  12 2895.01 310.604   3
  -3  -2  13 2263.88 280.196   3
  -3  -2  14 3881.82 397.029   3
  -3  -1 -16-308.325 105.237   2
  -3  -1 -15 1827.91 165.923   2
  -3  -1 -14 5605.79 273.184   2
  -3  -1 -14 5881.63 281.350   3
  -3  -1 -13 2258.90 159.071   3
  -3  -1 -13 2123.36 157.437   2
  -3  -1 -12 3586.75 189.433   2
  -3  -1 -12 3793.99 196.100   3
  -3  -1 -11 2061.06 131.174   2
  -3  -1 -11 2081.16 134.555   3
  -3  -1 -10 9906.69 261.062   2
  -3  -1 -10 10581.7 278.538   3
  -3  -1  -9 11672.0 246.573   2
  -3  -1  -9 11878.2 267.933   3
  -3  -1  -8 1488.11 72.8705   2
  -3  -1  -8 1593.20 88.3671   3
  -3  -1  -7 7123.79 149.825   3
  -3  -1  -6 31269.1 615.301   1
  -3  -1  -5 9476.88 317.737   1
  -3  -1  -4 15139.9 368.464   1
  -3  -1  -4 15524.1 405.506   4
  -3  -1  -3 2830.44 164.295   4
  -3  -1  -3 2683.48 97.3577   3
  -3  -1  -3 2536.63 143.070   1
  -3  -1  -2 17007.1 298.207   3
  -3  -1  -1 4401.44 177.222   3
  -3  -1   0 2843.38 160.884   3
  -3  -1   1 205.129 51.4759   3
  -3  -1   2 8432.90 326.030   3
  -3  -1   3 38604.2 745.579   3
  -3  -1   4 44290.1 854.650   3
  -3  -1   5 8443.57 402.220   3
  -3  -1   6 31.7539 61.1232   3
  -3  -1   7 22436.2 710.753   3
  -3  -1   8 24486.6 781.522   3
  -3  -1   9 10610.3 533.503   3
  -3  -1  10 20.0839 122.955   3
  -3  -1  11 8970.04 530.174   3
  -3  -1  12 11891.9 640.385   3
  -3   0 -16 7570.53 357.523   2
  -3   0 -15 3126.79 220.930   2
  -3   0 -14-15.8697 54.1004   2
  -3   0 -13 10363.3 338.622   3
  -3   0 -13 10020.6 342.917   2
  -3   0 -12 4981.80 228.288   2
  -3   0 -12 5128.34 216.823   3
  -3   0 -11 12817.0 315.375   3
  -3   0 -11 12338.6 327.703   2
  -3   0 -10-22.5356 33.6651   3
  -3   0 -10-37.2226 39.0157   2
  -3   0  -9 4290.98 154.991   2
  -3   0  -9 4364.55 145.007   3
  -3   0  -8 9742.58 177.001   3
  -3   0  -8 9438.66 187.229   2
  -3   0  -7 8673.46 359.247   1
  -3   0  -6 210.346 61.2562   1
  -3   0  -5 18294.6 452.944   1
  -3   0  -4 17059.2 408.584   1
  -3   0  -4 16740.1 396.990   4
  -3   0  -3 23275.0 436.156   4
  -3   0  -2 28226.0 382.730   3
  -3   0  -1 4473.68 179.135   3
  -3   0   0 1122.86 106.262   3
  -3   0   1 18796.9 446.358   3
  -3   0   2 37729.4 688.498   3
  -3   0   3 4743.93 264.747   3
  -3   0   4 3941.73 254.336   3
  -3   0   5 27475.8 710.497   3
  -3   0   6 17855.5 602.753   3
  -3   0   7 8101.20 424.863   3
  -3   0   8 261.507 80.3721   3
  -3   0   9 7320.40 441.331   3
  -3   1 -16 835.836 121.058   2
  -3   1 -15 6497.89 323.996   2
  -3   1 -14 5705.59 286.078   2
  -3   1 -13 1822.76 137.917   3
  -3   1 -13 1649.83 138.871   2
  -3   1 -12 4685.14 223.857   2
  -3   1 -12 4755.84 204.859   3
  -3   1 -11 4213.65 197.731   2
  -3   1 -11 4367.41 181.814   3
  -3   1 -10 24202.4 434.696   2
  -3   1 -10 23650.7 382.765   3
  -3   1  -9 10712.1 232.731   3
  -3   1  -9 11488.6 257.121   2
  -3   1  -8 1.17211 22.1756   2
  -3   1  -8-100.464 73.3390   1
  -3   1  -7 7175.26 333.690   1
  -3   1  -7 5517.75 140.455   2
  -3   1  -6 33353.4 679.214   1
  -3   1  -6 24731.3 251.236   2
  -3   1  -5 33209.7 638.848   1
  -3   1  -5 25706.2 247.709   2
  -3   1  -4 7314.70 281.102   1
  -3   1  -4 5354.08 145.025   2
  -3   1  -3 6365.98 176.543   2
  -3   1  -3 7070.27 219.037   4
  -3   1  -2 19753.2 350.974   2
  -3   2 -15 25.4062 69.3048   2
  -3   2 -14 3776.84 241.139   2
  -3   2 -13 17075.4 483.391   2
  -3   2 -13 17245.5 435.211   3
  -3   2 -12 17117.8 428.433   2
  -3   2 -12 16474.5 395.820   3
  -3   2 -11 661.619 72.2312   3
  -3   2 -11 598.475 76.1240   2
  -3   2 -10 616.987 73.1565   2
  -3   2  -9 23658.0 406.289   2
  -3   2  -8 68302.6 638.611   2
  -3   2  -7 23504.8 625.104   1
  -3   2  -7 21719.7 339.679   2
  -3   2  -6 572.631 98.7871   1
  -3   2  -6 554.609 53.4648   2
  -3   2  -5 9483.03 213.228   2
  -3   2  -5 9827.48 359.767   1
  -3   2  -4 39644.7 461.381   2
  -3   2  -3 32118.5 417.221   4
  -3   2  -3 31982.0 446.169   2
  -3   2  -2 12386.7 312.052   2
  -3   2  -1 9928.05 298.528   2
  -3   2   0 77896.1 887.435   2
  -3   2   1 84258.4 998.166   2
  -3   3 -15 8507.03 390.369   2
  -3   3 -13 4706.82 252.729   2
  -3   3 -12 423.718 78.0470   2
  -3   3 -11 18769.6 450.073   2
  -3   3 -10 18753.9 426.760   2
  -3   3  -9 5317.11 217.244   2
  -3   3  -8 2846.66 152.802   2
  -3   3  -7 43210.1 871.209   1
  -3   3  -7 42828.4 556.394   2
  -3   3  -6 44420.4 837.230   1
  -3   3  -6 44146.9 551.123   2
  -3   3  -5 21038.0 390.171   2
  -3   3  -4 6008.07 211.479   2
  -3   3  -3 21503.0 294.022   4
  -3   3  -3 22027.0 429.575   2
  -3   3  -2 71807.7 811.876   2
  -3   3  -1 87659.8 956.373   2
  -3   3   0 7619.87 296.216   2
  -3   3   1 1507.28 143.480   2
  -3   3   2 23081.9 581.538   2
  -3   3   3 30799.6 711.623   2
  -3   3   4 22358.0 634.508   2
  -3   4 -13 18070.8 518.709   2
  -3   4 -12 8614.12 343.303   2
  -3   4 -11 221.240 62.2067   2
  -3   4 -10 5870.70 259.932   2
  -3   4  -9 23660.1 504.596   2
  -3   4  -8 30557.1 556.129   2
  -3   4  -7 18722.4 421.039   2
  -3   4  -6 3459.30 180.095   2
  -3   4  -5 20734.7 442.927   2
  -3   4  -4 27247.3 513.338   2
  -3   4  -3 3914.41 205.024   2
  -3   4  -2 55.2942 41.6078   2
  -3   4  -1 12116.2 385.927   2
  -3   4   0 97025.7 1125.57   2
  -3   4   1 18854.7 528.786   2
  -3   4   2 7067.36 337.951   2
  -3   4   3 6352.96 340.961   2
  -3   4   4 14055.9 526.114   2
  -3   5 -12 4626.83 272.155   2
  -3   5 -11 15041.8 464.876   2
  -3   5 -10 15618.4 460.734   2
  -3   5  -9 2771.74 195.253   2
  -3   5  -8 7151.58 293.485   2
  -3   5  -7 30815.5 601.897   2
  -3   5  -6 39594.2 680.995   2
  -3   5  -5 8488.22 317.614   2
  -3   5  -4 0.24377 39.1154   2
  -3   5  -3 2294.08 171.921   2
  -3   5  -2 16877.5 477.963   2
  -3   5  -1 21559.7 556.667   2
  -3   5   0 11300.5 410.521   2
  -3   5   1 12361.3 445.921   2
  -3   5   2 4624.51 291.579   2
  -3   5   3 3520.31 269.381   2
  -3   6 -11 84.4572 51.7792   2
  -3   6 -10 6048.54 311.800   2
  -3   6  -9 15996.4 483.727   2
  -3   6  -8 14031.0 451.455   2
  -3   6  -7 5111.43 270.077   2
  -3   6  -6 3946.64 235.924   2
  -3   6  -5 14634.9 453.953   2
  -3   6  -4 10799.2 393.183   2
  -3   6  -3 2239.63 182.630   2
  -3   6  -2 309.392 86.1894   2
  -3   6  -1 2428.43 205.481   2
  -3   6   0 4843.65 293.165   2
  -3   6   1 6945.42 355.149   2
  -3   6   2 1335.29 172.635   2
  -3   7  -9 81.1645 49.5600   2
  -3   7  -8 3720.82 250.959   2
  -3   7  -7 2252.28 198.014   2
  -3   7  -6 7312.98 342.916   2
  -3   7  -5 217.079 70.9771   2
  -3   7  -4 5078.82 292.790   2
  -3   7  -3 7914.18 367.836   2
  -3   7  -2 7959.44 379.849   2
  -3   7  -1 580.239 108.735   2
  -3   7   0 1172.33 159.681   2
  -3  10  -6 10310.4 228.790   4
  -3  11  -7 7001.25 222.464   4
  -2 -18  -7 1440.32 284.969   2
  -2 -18  -6 18.0986 133.651   2
  -2 -18  -5 628.347 165.787   2
  -2 -18  -4 1967.51 308.263   3
  -2 -18  -4 1412.57 256.742   2
  -2 -18  -3 668.188 192.922   3
  -2 -18  -2 10.5221 133.338   3
  -2 -18  -1 412.665 152.189   3
  -2 -18   0 1482.30 265.038   3
  -2 -18   1 1743.54 311.714   3
  -2 -18   2 1025.87 226.382   3
  -2 -18   3 332.666 159.458   3
  -2 -18   4 3228.27 395.142   3
  -2 -17 -10 672.026 194.405   2
  -2 -17  -9 119.133 120.894   2
  -2 -17  -8 187.554 116.636   2
  -2 -17  -7 1850.25 303.015   2
  -2 -17  -6 2616.28 340.579   2
  -2 -17  -5 439.399 138.601   2
  -2 -17  -4 164.730 101.356   2
  -2 -17  -3 2957.86 360.892   2
  -2 -17  -3 2988.70 368.974   3
  -2 -17  -2 3159.56 375.890   3
  -2 -17  -1 2419.38 343.933   3
  -2 -17   0-13.6834 107.496   3
  -2 -17   0 75.1064 82.1166   1
  -2 -17   1 2918.35 364.705   3
  -2 -17   2 5980.28 512.634   3
  -2 -17   3 4545.66 447.617   3
  -2 -17   4 152.583 140.867   3
  -2 -17   5 2068.44 306.841   3
  -2 -17   6 7617.97 615.137   3
  -2 -17   7 5685.41 523.655   3
  -2 -16 -12 1512.35 282.850   2
  -2 -16 -11 293.313 151.216   2
  -2 -16 -10 900.959 216.465   2
  -2 -16  -9 1923.16 304.657   2
  -2 -16  -8 1800.14 269.176   2
  -2 -16  -7 163.803 113.475   2
  -2 -16  -6 880.172 213.620   2
  -2 -16  -5 3440.39 369.359   2
  -2 -16  -4 3849.10 396.921   2
  -2 -16  -3 1331.02 224.599   2
  -2 -16  -2 87.4396 124.695   3
  -2 -16  -1 4589.89 438.594   3
  -2 -16   0 9733.70 625.734   3
  -2 -16   0 8217.08 446.453   1
  -2 -16   1 3150.54 279.623   1
  -2 -16   1 3514.74 385.270   3
  -2 -16   2 43.3297 128.590   3
  -2 -16   2-139.230 100.035   1
  -2 -16   3 2720.75 344.113   3
  -2 -16   3 2585.77 252.077   1
  -2 -16   4 5435.52 360.456   1
  -2 -16   4 5599.72 489.926   3
  -2 -16   5 6150.27 516.258   3
  -2 -16   6 1541.34 269.617   3
  -2 -16   7 1247.44 238.305   3
  -2 -16   8 6133.67 546.327   3
  -2 -16   9 10636.8 727.633   3
  -2 -15 -14-186.661 162.300   2
  -2 -15 -13 289.206 137.400   2
  -2 -15 -12 1770.02 286.339   2
  -2 -15 -11 2361.94 312.685   2
  -2 -15 -10 312.743 133.726   2
  -2 -15  -9-6.20144 85.0427   2
  -2 -15  -8 2286.93 286.817   2
  -2 -15  -7 5454.83 447.287   2
  -2 -15  -6 4079.51 381.979   2
  -2 -15  -5 223.227 122.138   2
  -2 -15  -4 3385.42 342.704   2
  -2 -15  -3 6295.52 466.369   2
  -2 -15  -2 5560.22 440.809   2
  -2 -15  -2 5541.37 455.726   3
  -2 -15  -1 880.888 189.919   3
  -2 -15   0 1118.53 220.020   3
  -2 -15   1 14000.9 721.039   3
  -2 -15   1 12125.6 511.277   1
  -2 -15   2 12716.7 681.355   3
  -2 -15   2 11913.5 504.525   1
  -2 -15   3 6380.97 372.966   1
  -2 -15   3 6967.47 513.797   3
  -2 -15   4 27.2147 116.526   3
  -2 -15   4-94.9866 85.9222   1
  -2 -15   5 3198.37 373.301   3
  -2 -15   6 10727.0 661.466   3
  -2 -15   7 10290.8 667.028   3
  -2 -15   8 1265.15 256.560   3
  -2 -15   9 1167.16 234.962   3
  -2 -15  10 4964.09 487.164   3
  -2 -15  11 4571.14 480.822   3
  -2 -14 -15-210.686 136.755   2
  -2 -14 -14 1410.85 251.244   2
  -2 -14 -13 1421.05 255.312   2
  -2 -14 -12 328.274 135.710   2
  -2 -14 -11 651.316 163.971   2
  -2 -14 -10 3084.11 333.931   2
  -2 -14  -9 3262.24 337.858   2
  -2 -14  -8 906.137 189.736   2
  -2 -14  -7 277.641 94.7168   2
  -2 -14  -6 7194.34 487.624   2
  -2 -14  -5 13257.3 650.186   2
  -2 -14  -4 7683.29 498.277   2
  -2 -14  -3 551.397 142.153   2
  -2 -14  -2 5355.89 417.581   2
  -2 -14  -1 19164.2 793.799   3
  -2 -14   0 19684.6 815.865   3
  -2 -14   1 5761.59 445.299   3
  -2 -14   1 5163.97 316.000   1
  -2 -14   2 2434.52 295.039   3
  -2 -14   2 2243.28 201.928   1
  -2 -14   3 9049.55 422.048   1
  -2 -14   3 10261.1 599.661   3
  -2 -14   4 14793.5 720.167   3
  -2 -14   4 14637.5 542.234   1
  -2 -14   5 4700.93 420.046   3
  -2 -14   6 125.219 122.806   3
  -2 -14   7 5301.87 461.936   3
  -2 -14   8 9289.83 627.378   3
  -2 -14   9 6900.44 545.037   3
  -2 -14  10 1057.62 226.741   3
  -2 -14  11 120.179 134.561   3
  -2 -14  12 5895.40 524.416   3
  -2 -13 -15 143.161 99.1162   2
  -2 -13 -14-232.663 163.816   2
  -2 -13 -13 584.978 168.925   2
  -2 -13 -12 3175.98 336.135   2
  -2 -13 -11 2475.33 296.105   2
  -2 -13 -10 70.5473 82.7147   2
  -2 -13  -9 1065.47 179.982   2
  -2 -13  -8 9738.12 544.934   2
  -2 -13  -7 16765.6 708.672   2
  -2 -13  -6 8365.23 500.061   2
  -2 -13  -5 2648.17 285.539   2
  -2 -13  -4 17080.5 696.839   2
  -2 -13  -3 18041.4 718.260   2
  -2 -13  -2 7052.30 447.105   2
  -2 -13  -1 674.321 128.940   2
  -2 -13  -1 742.070 167.036   3
  -2 -13   0 1758.15 259.308   3
  -2 -13   1 17001.7 544.147   1
  -2 -13   1 18440.9 755.157   3
  -2 -13   2 27096.8 915.087   3
  -2 -13   2 26379.5 682.910   1
  -2 -13   3 3592.19 347.687   3
  -2 -13   3 3222.86 234.129   1
  -2 -13   4 1357.20 163.606   1
  -2 -13   4 1480.32 221.898   3
  -2 -13   5 10367.3 596.068   3
  -2 -13   6 12392.3 663.713   3
  -2 -13   7 5631.96 449.090   3
  -2 -13   8 8.25968 106.787   3
  -2 -13   9 3682.53 392.099   3
  -2 -13  10 8167.70 584.744   3
  -2 -13  11 2915.23 353.220   3
  -2 -13  12 45.7041 164.312   3
  -2 -13  13 1610.12 275.576   3
  -2 -13  14 3838.38 438.011   3
  -2 -12 -16 26.6709 132.183   2
  -2 -12 -15 1827.99 256.180   2
  -2 -12 -14 4139.43 384.954   2
  -2 -12 -13 2147.51 281.312   2
  -2 -12 -12-107.105 90.0689   2
  -2 -12 -11 4891.51 399.195   2
  -2 -12 -10 10280.0 555.482   2
  -2 -12  -9 7559.38 470.968   2
  -2 -12  -8 982.811 176.170   2
  -2 -12  -7 1074.17 180.192   2
  -2 -12  -6 5310.01 382.312   2
  -2 -12  -5 20811.6 738.748   2
  -2 -12  -4 4286.56 339.455   2
  -2 -12  -3 96.0695 59.6128   2
  -2 -12  -2 9676.97 496.875   2
  -2 -12  -1 19808.2 715.570   2
  -2 -12  -1 19892.2 738.517   3
  -2 -12   0 8212.12 480.668   3
  -2 -12   1 94.9525 80.1716   3
  -2 -12   1 66.8406 49.3206   1
  -2 -12   2 5837.75 406.026   3
  -2 -12   2 5711.45 300.057   1
  -2 -12   3 12357.1 600.202   3
  -2 -12   3 11990.1 440.536   1
  -2 -12   4 4228.04 355.923   3
  -2 -12   4 3949.84 252.240   1
  -2 -12   5 1786.86 241.601   3
  -2 -12   6 205.489 80.6799   3
  -2 -12   7 7968.54 521.060   3
  -2 -12   8 9524.28 584.893   3
  -2 -12   9 1339.11 241.057   3
  -2 -12  10 1420.70 235.652   3
  -2 -12  11 6633.42 529.398   3
  -2 -12  12 6003.76 507.355   3
  -2 -12  13 5889.07 517.831   3
  -2 -12  14 160.050 107.619   3
  -2 -12  15 1334.76 276.089   3
  -2 -11 -16 2132.23 276.553   2
  -2 -11 -15 483.462 135.076   2
  -2 -11 -14 258.548 91.5771   2
  -2 -11 -13 3742.47 343.696   2
  -2 -11 -12 7755.54 472.220   2
  -2 -11 -11 5102.25 381.005   2
  -2 -11 -10 212.257 82.9331   2
  -2 -11  -9 6076.11 399.122   2
  -2 -11  -8 12513.1 561.515   2
  -2 -11  -7 12285.2 549.111   2
  -2 -11  -6 2067.20 223.290   2
  -2 -11  -5 308.476 112.204   2
  -2 -11  -4 28195.1 807.767   2
  -2 -11  -3 9234.49 456.792   2
  -2 -11  -2 4320.54 315.775   2
  -2 -11  -1 453.354 89.9573   2
  -2 -11   0 300.693 107.548   3
  -2 -11   1 6188.81 396.878   3
  -2 -11   1 5636.18 279.692   1
  -2 -11   2 6251.57 407.311   3
  -2 -11   2 5857.13 287.307   1
  -2 -11   3 256.801 93.4381   3
  -2 -11   3 196.490 68.4472   1
  -2 -11   4 8938.89 495.306   3
  -2 -11   5 24146.3 824.158   3
  -2 -11   6 11082.3 573.025   3
  -2 -11   7 2828.91 296.109   3
  -2 -11   8 1891.10 244.481   3
  -2 -11   9 7140.87 503.212   3
  -2 -11  10 5104.56 431.244   3
  -2 -11  11 456.275 124.047   3
  -2 -11  12 515.141 117.005   3
  -2 -11  13 2509.41 344.179   3
  -2 -11  14 9172.93 646.985   3
  -2 -11  15 4640.71 487.433   3
  -2 -11  16 409.001 161.177   3
  -2 -10 -16 167.020 84.2704   2
  -2 -10 -15 3338.79 331.328   2
  -2 -10 -14 4205.59 355.556   2
  -2 -10 -13 1555.34 220.214   2
  -2 -10 -12 59.5527 67.2002   2
  -2 -10 -11 5940.41 397.506   2
  -2 -10 -10 8956.71 467.633   2
  -2 -10  -9 5666.58 368.056   2
  -2 -10  -8 846.834 142.921   2
  -2 -10  -7 236.603 82.0240   2
  -2 -10  -6 3753.56 280.820   2
  -2 -10  -5 2332.77 227.895   2
  -2 -10  -4 5178.69 335.462   2
  -2 -10  -3 8464.77 418.254   2
  -2 -10  -2 15330.4 557.570   2
  -2 -10  -1 17618.0 604.341   2
  -2 -10   0 12194.4 523.854   3
  -2 -10   1 125.077 96.4998   3
  -2 -10   2 5179.46 346.956   3
  -2 -10   2 4840.01 244.183   1
  -2 -10   3 6393.04 389.266   3
  -2 -10   3 6472.11 286.497   1
  -2 -10   4 3531.42 296.372   3
  -2 -10   5 1113.65 184.614   3
  -2 -10   6 396.884 116.495   3
  -2 -10   7 7123.01 457.923   3
  -2 -10   8 13094.9 637.830   3
  -2 -10   9 2620.21 299.894   3
  -2 -10  10 1805.61 247.158   3
  -2 -10  11 9430.19 591.568   3
  -2 -10  12 5686.68 470.286   3
  -2 -10  13 754.313 175.378   3
  -2 -10  14 218.619 164.593   3
  -2 -10  15 6468.76 558.278   3
  -2 -10  16 4836.84 488.607   3
  -2  -9 -16 3639.03 334.969   2
  -2  -9 -15 298.023 121.784   2
  -2  -9 -14 334.911 106.320   2
  -2  -9 -13 3764.96 317.178   2
  -2  -9 -12 4218.68 325.810   2
  -2  -9 -11 2745.78 249.067   2
  -2  -9 -10 1626.38 196.412   2
  -2  -9  -9 11935.7 500.586   2
  -2  -9  -8 15120.3 552.612   2
  -2  -9  -7 4346.37 293.855   2
  -2  -9  -6 320.408 81.4133   2
  -2  -9  -5 8041.09 387.901   2
  -2  -9  -4 6801.40 354.984   2
  -2  -9  -3 6800.24 351.403   2
  -2  -9  -2 1007.00 146.737   2
  -2  -9  -1 3360.93 247.986   2
  -2  -9   0 7220.42 379.183   3
  -2  -9   1 25890.6 734.029   3
  -2  -9   2 10948.8 336.180   1
  -2  -9   2 11453.1 489.546   3
  -2  -9   3 459.113 110.180   3
  -2  -9   3 343.846 64.0944   1
  -2  -9   4 21850.6 709.606   3
  -2  -9   5 23204.5 746.621   3
  -2  -9   6 4265.99 336.679   3
  -2  -9   7 433.211 115.903   3
  -2  -9   8 11025.2 564.998   3
  -2  -9   9 16175.8 698.346   3
  -2  -9  10 10446.7 585.320   3
  -2  -9  11 670.567 167.587   3
  -2  -9  12 3094.57 341.865   3
  -2  -9  13 6464.69 511.021   3
  -2  -9  14 3952.15 413.087   3
  -2  -9  15 3065.60 385.725   3
  -2  -9  16-45.2086 141.304   3
  -2  -9  17 3740.55 443.319   3
  -2  -8 -17-2.08016 70.2708   2
  -2  -8 -16 1142.72 200.140   2
  -2  -8 -15 3936.27 332.238   2
  -2  -8 -14 2505.85 256.479   2
  -2  -8 -13 473.614 124.240   2
  -2  -8 -12 1963.42 219.962   2
  -2  -8 -11 5432.27 343.952   2
  -2  -8 -10 7439.33 386.595   2
  -2  -8  -9 101.781 66.2485   2
  -2  -8  -8 3136.76 241.682   2
  -2  -8  -7 5799.85 317.319   2
  -2  -8  -6 11182.1 434.210   2
  -2  -8  -5 5723.23 306.654   2
  -2  -8  -4 394.525 85.1410   4
  -2  -8  -4 415.057 96.4665   2
  -2  -8  -3 5154.77 286.827   2
  -2  -8  -3 4707.23 280.872   4
  -2  -8  -2 15565.0 500.458   2
  -2  -8  -1 14227.7 480.478   2
  -2  -8   0 410.588 91.8798   3
  -2  -8   1 5685.22 324.444   3
  -2  -8   1 5501.88 215.930   1
  -2  -8   2 14183.9 516.230   3
  -2  -8   2 13965.5 351.008   1
  -2  -8   3 27983.4 744.047   3
  -2  -8   4 3620.35 281.150   3
  -2  -8   5 2260.97 227.432   3
  -2  -8   6 18590.6 666.301   3
  -2  -8   7 9144.65 485.951   3
  -2  -8   8 13876.2 609.909   3
  -2  -8   9 1246.59 190.041   3
  -2  -8  10 10184.8 559.708   3
  -2  -8  11 18581.9 789.943   3
  -2  -8  12 9923.37 594.126   3
  -2  -8  13 803.675 192.363   3
  -2  -8  14 1463.91 260.685   3
  -2  -8  15 4944.25 470.512   3
  -2  -8  16 6923.42 586.776   3
  -2  -8  17 3030.08 404.135   3
  -2  -8  18 257.760 157.356   3
  -2  -7 -17 3634.23 327.914   2
  -2  -7 -16 2279.84 259.061   2
  -2  -7 -15-76.1776 67.4855   2
  -2  -7 -14 3003.59 274.420   2
  -2  -7 -13 6257.76 369.310   2
  -2  -7 -12 3883.11 286.974   2
  -2  -7 -11 131.734 72.5753   2
  -2  -7 -10 140.769 54.7176   2
  -2  -7  -9 2522.01 211.429   2
  -2  -7  -8 7821.71 356.259   2
  -2  -7  -7 4131.80 254.396   2
  -2  -7  -6 2379.36 189.795   2
  -2  -7  -5 22533.4 563.561   2
  -2  -7  -5 21386.0 623.521   4
  -2  -7  -4 26001.7 594.595   2
  -2  -7  -4 25124.9 645.943   4
  -2  -7  -3 3877.74 243.597   4
  -2  -7  -3 3547.91 224.050   2
  -2  -7  -2 321.654 88.3218   2
  -2  -7  -1 8474.45 348.654   2
  -2  -7   0 25611.2 638.175   3
  -2  -7   1 22692.2 604.275   3
  -2  -7   1 22179.8 384.757   1
  -2  -7   2 2340.20 204.830   3
  -2  -7   2 2250.11 129.122   1
  -2  -7   3 17246.4 553.899   3
  -2  -7   4 43780.1 907.860   3
  -2  -7   5 28864.8 768.599   3
  -2  -7   6 2334.71 231.276   3
  -2  -7   7 11129.5 510.585   3
  -2  -7   8 7729.72 442.984   3
  -2  -7   9 33605.7 945.752   3
  -2  -7  10 10386.1 562.987   3
  -2  -7  11 103.810 69.9331   3
  -2  -7  12 2412.55 299.082   3
  -2  -7  13 11803.0 659.507   3
  -2  -7  14 7590.20 559.681   3
  -2  -7  15 802.094 209.749   3
  -2  -7  16 505.942 135.542   3
  -2  -7  17 2292.88 330.551   3
  -2  -7  18 3529.18 422.278   3
  -2  -6 -17 612.121 135.233   2
  -2  -6 -16 2998.02 280.518   2
  -2  -6 -15 3457.55 290.254   2
  -2  -6 -14 962.994 156.859   2
  -2  -6 -13-7.26933 61.7259   2
  -2  -6 -12 4486.28 294.833   2
  -2  -6 -11 17661.5 559.135   2
  -2  -6 -10 14347.5 479.859   2
  -2  -6  -9 537.107 101.409   2
  -2  -6  -8 11322.4 394.896   2
  -2  -6  -7 22065.2 536.088   2
  -2  -6  -6 31211.3 617.750   2
  -2  -6  -5 609.379 109.158   4
  -2  -6  -5 515.810 85.1838   2
  -2  -6  -4 485.104 86.3906   2
  -2  -6  -4 571.906 102.403   4
  -2  -6  -3 32236.9 673.562   4
  -2  -6  -3 32268.6 610.414   2
  -2  -6  -2 49293.9 758.994   2
  -2  -6  -2 48068.8 793.560   4
  -2  -6  -1 5303.01 266.154   3
  -2  -6  -1 5446.92 257.469   2
  -2  -6   0 10421.3 374.834   3
  -2  -6   1 35853.8 705.616   3
  -2  -6   1 35063.9 431.417   1
  -2  -6   2 72609.2 1040.51   3
  -2  -6   3 54212.4 928.718   3
  -2  -6   4 5542.94 318.278   3
  -2  -6   5 20064.5 613.215   3
  -2  -6   6 68768.1 1176.15   3
  -2  -6   7 42436.6 964.833   3
  -2  -6   8 146.833 84.7494   3
  -2  -6   9 474.633 110.752   3
  -2  -6  10 11019.3 553.635   3
  -2  -6  11 16600.4 714.186   3
  -2  -6  12 5277.14 425.685   3
  -2  -6  13 57.4623 93.2940   3
  -2  -6  14 2155.46 284.911   3
  -2  -6  15 4963.25 458.451   3
  -2  -6  16 3012.09 371.228   3
  -2  -6  17 782.321 190.167   3
  -2  -6  18 207.980 106.584   3
  -2  -5 -17 2578.71 267.013   2
  -2  -5 -16 267.851 94.7246   2
  -2  -5 -15 118.853 73.1282   2
  -2  -5 -14 6872.55 375.347   2
  -2  -5 -13 12466.7 487.162   2
  -2  -5 -12 3141.25 240.441   2
  -2  -5 -11 2738.57 238.284   3
  -2  -5 -11 2722.60 209.800   2
  -2  -5 -10 15960.9 479.128   2
  -2  -5  -9 19129.8 506.037   2
  -2  -5  -8 12297.4 383.888   2
  -2  -5  -7 94.4138 52.3878   2
  -2  -5  -6 10910.4 337.983   2
  -2  -5  -5 84890.5 913.012   2
  -2  -5  -4 74923.4 844.351   2
  -2  -5  -4 77263.7 1041.47   4
  -2  -5  -3 23102.6 470.663   2
  -2  -5  -3 23665.0 547.808   4
  -2  -5  -2 10282.2 315.867   2
  -2  -5  -2 9582.57 333.495   4
  -2  -5  -1 88022.6 977.890   3
  -2  -5   0 104214. 1092.83   3
  -2  -5   1 26727.8 571.719   3
  -2  -5   1 25867.4 309.658   1
  -2  -5   2 587.805 103.338   3
  -2  -5   3 54147.8 889.066   3
  -2  -5   4 56031.7 944.816   3
  -2  -5   5 15564.6 520.747   3
  -2  -5   6 1227.69 158.817   3
  -2  -5   7 5376.39 333.401   3
  -2  -5   8 22949.7 734.722   3
  -2  -5   9 14246.4 594.086   3
  -2  -5  10 6448.97 420.581   3
  -2  -5  11-107.731 125.656   3
  -2  -5  12 9556.78 555.556   3
  -2  -5  13 5677.44 450.736   3
  -2  -5  14 1154.97 216.829   3
  -2  -5  15 37.6699 122.904   3
  -2  -5  16 1910.54 281.250   3
  -2  -5  17 4285.29 447.818   3
  -2  -5  18 2772.91 383.668   3
  -2  -4 -17 1477.89 198.191   2
  -2  -4 -16 6589.59 400.155   2
  -2  -4 -15 2658.59 247.887   2
  -2  -4 -14-33.1266 65.2053   2
  -2  -4 -13 1772.74 176.639   2
  -2  -4 -12 18884.0 558.330   2
  -2  -4 -12 19267.7 615.264   3
  -2  -4 -11 15507.7 516.920   3
  -2  -4 -11 14931.1 470.616   2
  -2  -4 -10 4192.10 237.024   2
  -2  -4 -10 4637.31 271.179   3
  -2  -4  -9 2783.25 184.363   2
  -2  -4  -8 33003.0 583.540   2
  -2  -4  -7 34496.8 564.823   2
  -2  -4  -6 7577.85 253.644   2
  -2  -4  -5 9.23238 30.7962   2
  -2  -4  -4 19202.3 383.094   2
  -2  -4  -4 19934.3 502.028   4
  -2  -4  -3 80107.6 768.751   2
  -2  -4  -3 81583.4 971.138   4
  -2  -4  -2 98700.0 1017.97   4
  -2  -4  -2 99002.7 871.146   2
  -2  -4  -1 4288.81 202.056   3
  -2  -4   0 5883.11 239.728   3
  -2  -4   1 80232.8 917.558   3
  -2  -4   2 28700.1 580.599   3
  -2  -4   3 39000.5 716.972   3
  -2  -4   4 3763.51 240.641   3
  -2  -4   5 8405.92 369.706   3
  -2  -4   6 29913.8 731.833   3
  -2  -4   7 11863.7 485.728   3
  -2  -4   8 384.457 90.6288   3
  -2  -4   9 6928.22 407.923   3
  -2  -4  10 4136.37 332.924   3
  -2  -4  11 4502.75 361.617   3
  -2  -4  12 2870.59 306.348   3
  -2  -4  13 935.041 167.910   3
  -2  -4  14 3123.87 341.976   3
  -2  -4  15 2595.50 304.462   3
  -2  -4  16 573.262 129.900   3
  -2  -4  17 330.855 139.815   3
  -2  -3 -17 1384.59 184.507   2
  -2  -3 -16 67.1514 77.1306   2
  -2  -3 -15 6426.51 369.484   2
  -2  -3 -14 14003.3 515.772   2
  -2  -3 -13 1661.53 170.659   2
  -2  -3 -13 1600.82 175.259   3
  -2  -3 -12 2018.79 174.405   2
  -2  -3 -12 2013.49 189.536   3
  -2  -3 -11 7667.36 347.945   3
  -2  -3 -11 7643.24 326.026   2
  -2  -3 -10 27256.2 617.682   3
  -2  -3 -10 26629.3 570.311   2
  -2  -3  -9 33890.2 601.035   2
  -2  -3  -9 35274.3 655.385   3
  -2  -3  -8 11186.6 320.804   2
  -2  -3  -7 7796.66 248.656   2
  -2  -3  -6 48822.5 572.112   2
  -2  -3  -5 47917.9 533.015   2
  -2  -3  -4 40193.2 468.620   2
  -2  -3  -3 527.944 63.0832   2
  -2  -3  -3 619.104 89.0844   4
  -2  -3  -2 12443.4 287.816   3
  -2  -3  -2 12581.3 344.852   4
  -2  -3  -1 64170.5 672.387   3
  -2  -3   0 32095.1 501.425   3
  -2  -3   1 14593.3 369.011   3
  -2  -3   2 10434.9 335.329   3
  -2  -3   3 49827.8 773.305   3
  -2  -3   4 65889.9 948.196   3
  -2  -3   5 18897.7 543.104   3
  -2  -3   6 294.569 84.9266   3
  -2  -3   7 7705.81 387.188   3
  -2  -3   8 15710.2 589.326   3
  -2  -3   9 16104.5 628.805   3
  -2  -3  10 4206.04 328.775   3
  -2  -3  11 4179.83 350.895   3
  -2  -3  12 12060.4 613.039   3
  -2  -3  13 8685.60 540.711   3
  -2  -3  14 200.413 78.3980   3
  -2  -3  15 347.798 84.1403   3
  -2  -3  16 3110.35 357.504   3
  -2  -2 -17 4230.29 323.618   2
  -2  -2 -16 7570.96 414.987   2
  -2  -2 -15 3108.48 249.671   2
  -2  -2 -14-100.630 64.7097   2
  -2  -2 -13 14280.7 483.218   2
  -2  -2 -13 15238.3 513.131   3
  -2  -2 -12 9177.96 377.760   3
  -2  -2 -12 8761.60 356.799   2
  -2  -2 -11 18249.0 483.154   2
  -2  -2 -11 19445.6 526.607   3
  -2  -2 -10 1308.57 118.814   2
  -2  -2 -10 1266.39 127.012   3
  -2  -2  -9 9487.21 303.989   2
  -2  -2  -9 9603.64 326.202   3
  -2  -2  -8 27683.7 476.297   2
  -2  -2  -8 27497.6 511.463   3
  -2  -2  -7 8090.79 233.096   2
  -2  -2  -7 7834.40 252.565   3
  -2  -2  -6 95.2423 25.1895   2
  -2  -2  -5 134.548 32.7388   2
  -2  -2  -4 10166.4 186.462   2
  -2  -2  -3 22007.5 265.098   2
  -2  -2  -3 21971.1 448.511   4
  -2  -2  -2 48290.0 622.413   4
  -2  -2  -2 47769.8 467.649   3
  -2  -2  -1 9776.84 149.891   1
  -2  -2  -1 10535.3 238.601   3
  -2  -2   0 10548.5 265.728   3
  -2  -2   1 41368.5 576.651   3
  -2  -2   2 12172.3 342.634   3
  -2  -2   3 361.038 79.3132   3
  -2  -2   4 3349.39 211.997   3
  -2  -2   5 19446.2 545.993   3
  -2  -2   6 1757.57 180.804   3
  -2  -2   7 1093.36 149.930   3
  -2  -2   8 5135.94 333.736   3
  -2  -2   9 7391.10 423.426   3
  -2  -2  10 13799.9 598.697   3
  -2  -2  11 6213.38 416.953   3
  -2  -2  12-41.3727 123.808   3
  -2  -2  13 6683.12 464.239   3
  -2  -2  14 7630.56 529.222   3
  -2  -1 -17 1293.94 167.846   2
  -2  -1 -16 1447.80 183.083   2
  -2  -1 -15 11891.5 490.641   2
  -2  -1 -14 14789.3 511.452   2
  -2  -1 -14 15563.6 526.599   3
  -2  -1 -13 3019.81 218.583   2
  -2  -1 -13 3218.95 235.917   3
  -2  -1 -12 5205.90 275.713   3
  -2  -1 -12 5298.95 277.589   2
  -2  -1 -11 4890.98 248.712   3
  -2  -1 -11 4537.73 239.676   2
  -2  -1 -10 22299.8 498.022   2
  -2  -1 -10 23698.7 514.003   3
  -2  -1  -9 19441.2 431.233   3
  -2  -1  -9 18898.2 418.976   2
  -2  -1  -8 1402.33 105.250   2
  -2  -1  -8 1685.65 120.295   3
  -2  -1  -7 16601.8 340.558   3
  -2  -1  -7 16939.9 313.396   2
  -2  -1  -6 33138.5 426.026   3
  -2  -1  -6 34658.2 382.357   2
  -2  -1  -5 21986.6 244.683   2
  -2  -1  -5 22412.1 288.454   3
  -2  -1  -3 2076.54 69.8493   3
  -2  -1  -2 13451.9 302.182   4
  -2  -1  -2 13232.9 249.373   1
  -2  -1  -2 13245.9 199.754   3
  -2  -1  -1 14412.3 246.543   3
  -2  -1   0 9023.51 226.921   3
  -2  -1   1 615.960 74.9182   3
  -2  -1   2 4762.15 214.039   3
  -2  -1   3 9729.67 333.795   3
  -2  -1   4 24061.6 569.297   3
  -2  -1   5 1974.39 176.686   3
  -2  -1   6 14891.1 511.339   3
  -2  -1   7 9534.46 435.064   3
  -2  -1   8 7108.16 392.573   3
  -2  -1   9 224.472 69.6512   3
  -2  -1  10 610.760 88.5951   3
  -2  -1  11 12845.8 597.504   3
  -2  -1  12 9400.60 534.382   3
  -2   0 -17 5986.24 376.383   2
  -2   0 -16 7470.29 405.935   2
  -2   0 -15 495.565 85.0843   2
  -2   0 -14 4396.73 279.722   2
  -2   0 -14 4145.83 259.584   3
  -2   0 -13 14063.4 467.272   3
  -2   0 -13 14337.8 480.759   2
  -2   0 -12 17532.7 506.247   2
  -2   0 -12 17868.9 496.241   3
  -2   0 -11 3271.87 202.008   2
  -2   0 -11 3393.78 203.147   3
  -2   0 -10-1.40690 57.3199   3
  -2   0 -10-24.4414 43.9893   2
  -2   0  -9 2455.81 149.440   2
  -2   0  -9 2437.13 148.066   3
  -2   0  -8 12718.1 312.344   2
  -2   0  -8 12740.6 305.258   3
  -2   0  -7 11321.0 260.435   2
  -2   0  -7 11006.3 251.285   3
  -2   0  -6 4568.63 141.018   2
  -2   0  -6 4481.38 136.039   3
  -2   0  -5 158.258 23.8867   3
  -2   0  -5 141.991 24.2455   2
  -2   0  -4 3898.22 189.982   1
  -2   0  -3 35455.6 505.373   1
  -2   0  -2 15247.0 296.249   1
  -2   0  -2 15763.9 295.721   4
  -2   0  -1 56697.7 481.402   3
  -2   0   0 8129.09 220.813   3
  -2   0   1 3858.97 175.737   3
  -2   0   2 1668.30 131.087   3
  -2   0   3 2535.21 171.939   3
  -2   0   4 17332.7 484.562   3
  -2   0   5 25878.1 634.652   3
  -2   0   6 20836.5 608.012   3
  -2   0   7 7816.73 387.428   3
  -2   0   8 6905.27 388.207   3
  -2   0   9 15836.7 611.144   3
  -2   0  10 11209.7 535.143   3
  -2   1 -17 177.799 67.5457   2
  -2   1 -16 513.506 98.3531   2
  -2   1 -15 7082.40 382.065   2
  -2   1 -14 12010.9 454.802   3
  -2   1 -14 12290.2 477.180   2
  -2   1 -13 4086.40 267.077   2
  -2   1 -13 4028.08 245.134   3
  -2   1 -12 35.0044 73.8623   3
  -2   1 -12 78.5790 53.5056   2
  -2   1 -11 4175.10 223.318   3
  -2   1 -10 21912.8 472.880   3
  -2   1  -9 14747.1 356.229   3
  -2   1  -8 2493.79 132.331   3
  -2   1  -7 10164.2 237.415   3
  -2   1  -7 10641.4 394.054   1
  -2   1  -6 35037.9 383.955   3
  -2   1  -6 36159.5 678.677   1
  -2   1  -5 7293.51 287.054   1
  -2   1  -5 6709.53 158.014   2
  -2   1  -4 94.8063 36.6888   1
  -2   1  -4 59.5920 20.0338   2
  -2   1  -3 6217.29 134.537   2
  -2   1  -3 6589.73 234.823   1
  -2   1  -2 832.815 62.8041   4
  -2   1  -2 644.195 55.1369   2
  -2   1  -1 125361. 780.029   2
  -2   1   0 44.1408 35.7496   2
  -2   1   1 11509.5 301.060   2
  -2   2 -17 4484.34 335.875   2
  -2   2 -16 4944.29 340.327   2
  -2   2 -15 377.415 95.5952   2
  -2   2 -14 3607.35 259.183   2
  -2   2 -13 9185.86 373.635   3
  -2   2 -12 7382.55 319.412   3
  -2   2 -11 151.368 56.1394   3
  -2   2 -10 2592.14 164.474   3
  -2   2  -9 15258.6 368.065   3
  -2   2  -8 19922.1 386.927   3
  -2   2  -8 19359.3 578.525   1
  -2   2  -7 3896.34 243.536   1
  -2   2  -7 4126.07 165.419   3
  -2   2  -6 6.37191 47.6654   1
  -2   2  -6 58.2312 29.0484   2
  -2   2  -5 10681.2 358.788   1
  -2   2  -5 9819.23 232.290   2
  -2   2  -4 42780.7 450.111   2
  -2   2  -4 43843.8 678.170   1
  -2   2  -3 48141.1 483.905   2
  -2   2  -2 11729.5 252.717   2
  -2   2  -2 11674.1 184.657   4
  -2   2  -1 215445. 1163.79   2
  -2   2   0 555009. 2038.19   2
  -2   2   1 22437.2 450.622   2
  -2   2   2 27.4057 44.2005   2
  -2   2   3 3497.42 205.079   2
  -2   3 -17-45.1596 69.0013   2
  -2   3 -16 1958.47 218.772   2
  -2   3 -13 3366.03 234.100   3
  -2   3 -12 368.672 74.9400   3
  -2   3 -11 3971.83 224.603   3
  -2   3 -10 4648.82 232.044   3
  -2   3  -9 1992.22 138.291   3
  -2   3  -8 2429.09 146.505   3
  -2   3  -8 2344.15 153.035   2
  -2   3  -7 62495.2 1006.19   1
  -2   3  -7 61933.5 731.167   2
  -2   3  -6 47581.0 832.785   1
  -2   3  -6 47417.1 611.919   2
  -2   3  -5 6399.79 216.663   2
  -2   3  -5 6282.57 287.271   1
  -2   3  -4 2845.27 138.508   2
  -2   3  -3 17762.5 353.078   2
  -2   3  -2 22945.2 413.436   2
  -2   3  -1 9258.79 281.885   2
  -2   3   0 17057.3 398.594   2
  -2   3   1 37420.5 624.279   2
  -2   3   2 49853.3 768.022   2
  -2   3   3 35822.3 691.131   2
  -2   3   4 5907.88 299.678   2
  -2   3   5 7418.06 352.797   2
  -2   4 -17 2654.37 273.993   2
  -2   4 -13 9471.66 402.398   3
  -2   4 -12 4571.49 263.006   3
  -2   4 -11 803.182 110.307   3
  -2   4 -11 690.179 113.972   2
  -2   4 -10 8655.00 330.628   3
  -2   4 -10 8660.51 342.611   2
  -2   4  -9 28135.8 592.408   2
  -2   4  -8 23744.3 524.916   2
  -2   4  -7 10359.7 422.416   1
  -2   4  -7 10735.8 338.449   2
  -2   4  -6 29654.2 537.522   2
  -2   4  -6 30034.7 680.966   1
  -2   4  -5 45352.9 657.294   2
  -2   4  -4 60510.7 740.317   2
  -2   4  -3 29771.8 525.059   2
  -2   4  -2 388.005 69.2124   2
  -2   4  -1 35572.9 603.211   2
  -2   4   0 69113.3 880.970   2
  -2   4   1 33916.2 643.325   2
  -2   4   2 46.3030 52.1369   2
  -2   4   3 8484.01 359.371   2
  -2   4   4 15790.2 510.076   2
  -2   4   5 21716.6 620.208   2
  -2   4   6 12861.1 502.054   2
  -2   5 -11 17342.9 538.805   2
  -2   5 -10 6862.15 326.882   2
  -2   5  -9-28.0661 57.3128   2
  -2   5  -8 18602.9 499.394   2
  -2   5  -7 29182.2 605.773   2
  -2   5  -6 32374.7 625.552   2
  -2   5  -5 153.270 64.7858   2
  -2   5  -4 17450.2 443.588   2
  -2   5  -3 38350.6 664.180   2
  -2   5  -2 48861.7 754.901   2
  -2   5  -1 17111.2 457.360   2
  -2   5   0 333.458 90.2248   2
  -2   5   1 17806.1 505.034   2
  -2   5   2 35862.1 734.639   2
  -2   5   3 13317.0 465.642   2
  -2   5   4 292.395 85.0888   2
  -2   5   5 6349.07 349.891   2
  -2   6 -10 25778.3 668.992   2
  -2   6  -9 29047.3 692.718   2
  -2   6  -8 19714.6 549.576   2
  -2   6  -7 179.943 55.5430   2
  -2   6  -6 10576.9 390.803   2
  -2   6  -5 50960.2 838.082   2
  -2   6  -4 30582.8 648.460   2
  -2   6  -3 2441.17 193.106   2
  -2   6  -2 11815.6 410.212   2
  -2   6  -1 15427.1 472.774   2
  -2   6   0 13323.2 451.287   2
  -2   6   1 6056.21 314.784   2
  -2   6   2 432.842 91.7736   2
  -2   6   3 4835.98 297.963   2
  -2   6   4 18245.9 600.041   2
  -2   7  -8 17475.5 559.262   2
  -2   7  -7 20043.6 592.389   2
  -2   7  -6 4444.05 276.090   2
  -2   7  -5 2637.18 211.708   2
  -2   7  -4 24266.2 629.290   2
  -2   7  -3 23382.4 611.413   2
  -2   7  -3 20099.0 284.419   4
  -2   7  -2 20196.3 573.403   2
  -2   7  -1 138.437 85.3036   2
  -2   7   0 2317.73 205.425   2
  -2   7   1 16346.1 550.490   2
  -2   7   2 12697.7 506.286   2
  -2   8  -4 6933.32 363.237   2
  -2   8  -3 10.4506 21.6680   4
  -2   8  -3 13.3219 66.2743   2
  -2   8  -2 7869.11 384.442   2
  -2   9  -4 12176.5 282.316   4
  -2  10  -5 6007.36 223.937   4
  -2  10  -4 145.612 38.7470   4
  -2  11  -5 4832.68 205.622   4
  -2  12  -6 9213.94 315.189   4
  -2  12  -5 4868.84 215.921   4
  -1 -18  -6 195.653 111.518   2
  -1 -18  -5 2165.39 338.375   2
  -1 -18  -4 2868.72 378.578   2
  -1 -18  -3 2599.88 368.036   2
  -1 -18  -2 207.717 119.587   2
  -1 -18  -2 220.492 119.648   3
  -1 -18  -1 1167.19 251.024   3
  -1 -18   0 2755.58 357.934   3
  -1 -18   0 2595.09 291.415   1
  -1 -18   1 2013.34 328.440   3
  -1 -18   1 1569.33 217.087   1
  -1 -18   2 105.858 82.9478   1
  -1 -18   2 81.0235 134.928   3
  -1 -18   3 631.832 193.575   3
  -1 -18   4 2642.04 345.809   3
  -1 -18   5 2752.88 367.780   3
  -1 -17  -9-205.038 159.676   2
  -1 -17  -8 1084.30 225.990   2
  -1 -17  -7 2888.60 364.769   2
  -1 -17  -6 1533.27 274.450   2
  -1 -17  -5 218.965 101.294   2
  -1 -17  -4 205.770 108.787   2
  -1 -17  -3 1813.92 285.042   2
  -1 -17  -2 3447.35 381.812   2
  -1 -17  -1 1283.59 222.513   2
  -1 -17  -1 1697.93 303.468   3
  -1 -17   0-97.1005 112.925   3
  -1 -17   1 3005.06 376.211   3
  -1 -17   1 2670.25 291.718   1
  -1 -17   2 4040.99 419.899   3
  -1 -17   2 3251.35 315.034   1
  -1 -17   3 2184.30 297.598   3
  -1 -17   3 2186.97 249.196   1
  -1 -17   4-92.2747 163.351   3
  -1 -17   4-31.3347 109.595   1
  -1 -17   5 762.692 165.824   1
  -1 -17   5 917.659 223.912   3
  -1 -17   6 3595.30 418.127   3
  -1 -17   7 2176.08 333.325   3
  -1 -17   8 399.842 168.461   3
  -1 -16 -11 234.703 117.788   2
  -1 -16 -10 1828.86 286.957   2
  -1 -16  -9 1411.70 271.412   2
  -1 -16  -8 1514.56 259.196   2
  -1 -16  -7-159.560 127.357   2
  -1 -16  -6 1638.44 264.405   2
  -1 -16  -5 3485.72 364.471   2
  -1 -16  -4 2386.43 312.999   2
  -1 -16  -3 474.956 164.293   2
  -1 -16  -2 749.000 172.624   2
  -1 -16  -1 4478.02 422.761   2
  -1 -16   0 6383.23 515.653   3
  -1 -16   1 2172.72 306.053   3
  -1 -16   1 1593.47 209.792   1
  -1 -16   2 907.952 149.554   1
  -1 -16   2 1164.69 223.135   3
  -1 -16   3 3667.49 380.307   3
  -1 -16   3 3647.39 319.546   1
  -1 -16   4 4914.38 452.273   3
  -1 -16   4 4666.01 358.774   1
  -1 -16   5 1345.40 195.414   1
  -1 -16   5 1398.18 260.498   3
  -1 -16   6-23.9868 117.307   3
  -1 -16   7 3556.58 400.729   3
  -1 -16   8 5255.11 519.566   3
  -1 -16   9 6139.04 535.341   3
  -1 -16  10 380.281 140.939   3
  -1 -15 -13 53.2104 107.791   2
  -1 -15 -12 740.313 207.619   2
  -1 -15 -11 552.833 173.643   2
  -1 -15 -10 686.958 180.678   2
  -1 -15  -9 178.712 118.608   2
  -1 -15  -8 1362.47 257.650   2
  -1 -15  -7 3865.45 397.361   2
  -1 -15  -6 4292.46 415.678   2
  -1 -15  -5 80.0152 87.5597   2
  -1 -15  -4 2168.97 286.857   2
  -1 -15  -3 4965.24 422.699   2
  -1 -15  -2 3824.42 360.697   2
  -1 -15  -1-40.5103 86.0144   2
  -1 -15   0 2749.70 334.664   3
  -1 -15   0 3143.71 339.205   2
  -1 -15   1 9309.44 589.060   3
  -1 -15   1 8509.87 465.385   1
  -1 -15   2 6385.99 493.228   3
  -1 -15   2 5987.39 391.098   1
  -1 -15   3 476.656 103.897   1
  -1 -15   3 739.597 211.203   3
  -1 -15   4 648.422 182.675   3
  -1 -15   4 326.179 101.867   1
  -1 -15   5 5161.66 445.326   3
  -1 -15   5 4767.36 351.214   1
  -1 -15   6 6804.29 524.994   3
  -1 -15   7 2829.02 344.832   3
  -1 -15   8 784.866 208.750   3
  -1 -15   9 3427.20 397.858   3
  -1 -15  10 8433.80 627.760   3
  -1 -15  11 2930.77 385.818   3
  -1 -15  12 299.545 158.338   3
  -1 -14 -15-254.933 154.488   2
  -1 -14 -14 1711.69 291.586   2
  -1 -14 -13 2095.98 319.641   2
  -1 -14 -12 712.102 189.927   2
  -1 -14 -11 539.516 165.161   2
  -1 -14 -10 2638.81 319.721   2
  -1 -14  -9 2707.02 312.425   2
  -1 -14  -8 313.571 104.972   2
  -1 -14  -7 1110.47 212.929   2
  -1 -14  -6 5032.26 418.396   2
  -1 -14  -5 17231.3 757.171   2
  -1 -14  -4 1158.05 209.780   2
  -1 -14  -3 412.962 133.558   2
  -1 -14  -2 6512.04 460.424   2
  -1 -14  -1 9612.65 547.636   2
  -1 -14   0 9111.95 543.405   2
  -1 -14   1 1761.65 250.604   3
  -1 -14   2 5763.89 448.341   3
[truncated: 257,632 more chars]
