# Supplementary material for: A Series of Novel Pentagonal-Bipyramidal Erbium(III) Complexes with Acyclic Chelating N3O2 Schiff-Base Ligands: Synthesis, Structure, and Magnetism
Source: Molecules. 2021 Nov 16;26(22):6908. doi: 10.3390/molecules26226908 (PMC8622354; doi:10.3390/molecules26226908)
Supplement: Supplementary file 1 [file molecules-26-06908-s001.zip › Supplementary files/3.cif]

 
data_2016
 
_audit_creation_method            'SHELXL-2016/6'
_shelx_SHELXL_version_number      '2016/6'
_chemical_name_systematic         ?
_chemical_name_common             ?
_chemical_melting_point           ?
_chemical_formula_moiety          ?
_chemical_formula_sum
 'C26 H27 Cl Er N5 O5' 
_chemical_formula_weight          692.23

loop_
 _atom_type_symbol
 _atom_type_description
 _atom_type_scat_dispersion_real
 _atom_type_scat_dispersion_imag
 _atom_type_scat_source
 'C'  'C'   0.0033   0.0016
 'International Tables Vol C Tables 4.2.6.8 and 6.1.1.4'
 'H'  'H'   0.0000   0.0000
 'International Tables Vol C Tables 4.2.6.8 and 6.1.1.4'
 'Cl'  'Cl'   0.1484   0.1585
 'International Tables Vol C Tables 4.2.6.8 and 6.1.1.4'
 'Er'  'Er'  -0.2586   4.9576
 'International Tables Vol C Tables 4.2.6.8 and 6.1.1.4'
 'N'  'N'   0.0061   0.0033
 'International Tables Vol C Tables 4.2.6.8 and 6.1.1.4'
 'O'  'O'   0.0106   0.0060
 'International Tables Vol C Tables 4.2.6.8 and 6.1.1.4'
 
_space_group_crystal_system       triclinic
_space_group_IT_number            2
_space_group_name_H-M_alt         'P -1'
_space_group_name_Hall            '-P 1'
 
_shelx_space_group_comment
;
The symmetry employed for this shelxl refinement is uniquely defined
by the following loop, which should always be used as a source of
symmetry information in preference to the above space-group names.
They are only intended as comments.
;
 
loop_
 _space_group_symop_operation_xyz
 'x, y, z'
 '-x, -y, -z'
 
_cell_length_a                    7.03382(10)
_cell_length_b                    11.4540(3)
_cell_length_c                    16.6083(4)
_cell_angle_alpha                 90.8970(19)
_cell_angle_beta                  98.0629(15)
_cell_angle_gamma                 104.4169(16)
_cell_volume                      1281.32(5)
_cell_formula_units_Z             2
_cell_measurement_temperature     150(1)
_cell_measurement_reflns_used     12845
_cell_measurement_theta_min       2.2500
_cell_measurement_theta_max       32.7440
 
_exptl_crystal_description        plate
_exptl_crystal_colour             yellow
_exptl_crystal_density_meas       ?
_exptl_crystal_density_method     ?
_exptl_crystal_density_diffrn     1.794          
_exptl_crystal_F_000              686
_exptl_transmission_factor_min    ?
_exptl_transmission_factor_max    ?
_exptl_crystal_size_max           0.471
_exptl_crystal_size_mid           0.213
_exptl_crystal_size_min           0.041
_exptl_absorpt_coefficient_mu     3.427
_shelx_estimated_absorpt_T_min    0.295
_shelx_estimated_absorpt_T_max    0.872
_exptl_absorpt_correction_type    multi-scan
_exptl_absorpt_correction_T_min   0.53576
_exptl_absorpt_correction_T_max   1.00000
_exptl_absorpt_process_details
;
CrysAlisPro 1.171.39.46 (Rigaku Oxford Diffraction, 2018)
Empirical absorption correction using spherical harmonics,
 implemented in SCALE3 ABSPACK scaling algorithm.
;
_oxdiff_exptl_absorpt_empirical_full_min           0.814
_oxdiff_exptl_absorpt_empirical_full_max           1.775
_oxdiff_exptl_absorpt_empirical_details
;
Empirical correction (ABSPACK) includes:
- Absorption correction using spherical harmonics
- Frame scaling
;
_diffrn_ambient_temperature       150(1)
_diffrn_ambient_environment       N~2~
_diffrn_source                    'fine-focus sealed X-ray tube'
_diffrn_source_type               'Enhance (Mo) X-ray Source'
_diffrn_radiation_probe           x-ray
_diffrn_radiation_type            'Mo K\a'
_diffrn_radiation_wavelength      0.71073
_diffrn_radiation_monochromator   graphite
_diffrn_measurement_device        'four-circle diffractometer'
_diffrn_measurement_device_type   'Xcalibur, AtlasS2, Gemini'
_diffrn_detector                  'CCD plate'
_diffrn_detector_type             AtlasS2
_diffrn_measurement_method        '\w scans'
_diffrn_detector_area_resol_mean  10.4566
_diffrn_reflns_number             27236
_diffrn_reflns_av_unetI/netI      0.0322
_diffrn_reflns_av_R_equivalents   0.0269
_diffrn_reflns_limit_h_min        -10
_diffrn_reflns_limit_h_max        10
_diffrn_reflns_limit_k_min        -16
_diffrn_reflns_limit_k_max        17
_diffrn_reflns_limit_l_min        -24
_diffrn_reflns_limit_l_max        24
_diffrn_reflns_theta_min          1.838
_diffrn_reflns_theta_max          33.006
_diffrn_reflns_theta_full         31.000
_diffrn_measured_fraction_theta_max   0.912
_diffrn_measured_fraction_theta_full  0.993
_diffrn_reflns_Laue_measured_fraction_max    0.912
_diffrn_reflns_Laue_measured_fraction_full   0.993
_diffrn_reflns_point_group_measured_fraction_max   0.912
_diffrn_reflns_point_group_measured_fraction_full  0.993
_reflns_number_total              8819
_reflns_number_gt                 8134
_reflns_threshold_expression      'I > 2\s(I)'
_reflns_Friedel_coverage          0.000
_reflns_Friedel_fraction_max      .
_reflns_Friedel_fraction_full     .
 
_reflns_special_details
;
 Reflections were merged by SHELXL according to the crystal
 class for the calculation of statistics and refinement.
 
 _reflns_Friedel_fraction is defined as the number of unique
 Friedel pairs measured divided by the number that would be
 possible theoretically, ignoring centric projections and
 systematic absences.
;
 
_computing_data_collection        'CrysAlisPro 1.171.39.46 (Rigaku OD, 2015)'
_computing_cell_refinement        'CrysAlisPro 1.171.39.46 (Rigaku OD, 2015)'
_computing_data_reduction         'CrysAlisPro 1.171.39.46 (Rigaku OD, 2015)'
_computing_structure_solution     'Superflip (Palatinus & Chapuis, 2007)'
_computing_structure_refinement   'SHELXL-2013 (Sheldrick, 2013)'
_computing_molecular_graphics     'DIAMOND 3.1 (Crystal Impact GbR 2005)'
_computing_publication_material   'WinGX publication routines (Farrugia, 1999)' 

_refine_special_details           ?
_refine_ls_structure_factor_coef  Fsqd
_refine_ls_matrix_type            full
_refine_ls_weighting_scheme       calc
_refine_ls_weighting_details
'w=1/[\s^2^(Fo^2^)+(0.0220P)^2^+1.2791P] where P=(Fo^2^+2Fc^2^)/3'
_atom_sites_solution_primary      direct
_atom_sites_solution_secondary    difmap
_atom_sites_solution_hydrogens    mixed
_refine_ls_hydrogen_treatment     mixed
_refine_ls_extinction_method      none
_refine_ls_extinction_coef        .
_refine_ls_number_reflns          8819
_refine_ls_number_parameters      351
_refine_ls_number_restraints      0
_refine_ls_R_factor_all           0.0287
_refine_ls_R_factor_gt            0.0241
_refine_ls_wR_factor_ref          0.0544
_refine_ls_wR_factor_gt           0.0521
_refine_ls_goodness_of_fit_ref    1.003
_refine_ls_restrained_S_all       1.003
_refine_ls_shift/su_max           0.005
_refine_ls_shift/su_mean          0.000
 
loop_
 _atom_site_label
 _atom_site_type_symbol
 _atom_site_fract_x
 _atom_site_fract_y
 _atom_site_fract_z
 _atom_site_U_iso_or_equiv
 _atom_site_adp_type
 _atom_site_occupancy
 _atom_site_site_symmetry_order  
 _atom_site_calc_flag
 _atom_site_refinement_flags_posn
 _atom_site_refinement_flags_adp
 _atom_site_refinement_flags_occupancy
 _atom_site_disorder_assembly
 _atom_site_disorder_group
Er1 Er 0.95213(2) 0.05415(2) 0.77304(2) 0.01514(3) Uani 1 1 d . . . . .
Cl1 Cl 0.58995(8) -0.02420(5) 0.80269(3) 0.02151(10) Uani 1 1 d . . . . .
O1 O 0.8743(2) 0.16825(14) 0.67119(9) 0.0197(3) Uani 1 1 d . . . . .
O2 O 1.0666(2) 0.20889(14) 0.86598(9) 0.0191(3) Uani 1 1 d . . . . .
O3 O 0.6333(3) 0.41542(15) 0.34485(10) 0.0251(3) Uani 1 1 d . . . . .
O4 O 1.4083(3) 0.57439(15) 1.17577(10) 0.0258(3) Uani 1 1 d . . . . .
O5 O 1.2616(2) 0.09075(16) 0.72979(10) 0.0216(3) Uani 1 1 d . . . . .
H5A H 1.332(5) 0.057(3) 0.7457(19) 0.032 Uiso 1 1 d . U . . .
N1 N 0.7904(3) 0.00573(16) 0.57516(10) 0.0170(3) Uani 1 1 d . . . . .
N2 N 0.8513(2) -0.05477(16) 0.64186(10) 0.0158(3) Uani 1 1 d . . . . .
N3 N 0.9942(2) -0.15017(16) 0.77068(10) 0.0153(3) Uani 1 1 d . . . . .
N4 N 1.1346(3) 0.00389(16) 0.89518(10) 0.0167(3) Uani 1 1 d . . . . .
N5 N 1.2094(3) 0.09178(16) 0.95736(11) 0.0183(3) Uani 1 1 d . . . . .
C1 C 0.6529(4) 0.5412(2) 0.35919(15) 0.0305(5) Uani 1 1 d . . . . .
H1A H 0.566356 0.552636 0.398402 0.046 Uiso 1 1 calc R U . . .
H1B H 0.614857 0.576388 0.307882 0.046 Uiso 1 1 calc R U . . .
H1C H 0.791105 0.581147 0.381132 0.046 Uiso 1 1 calc R U . . .
C2 C 0.7847(3) 0.32211(19) 0.55011(13) 0.0189(4) Uani 1 1 d . . . . .
H2 H 0.829297 0.354654 0.604408 0.023 Uiso 1 1 calc R U . . .
C3 C 0.7477(3) 0.3983(2) 0.48855(13) 0.0200(4) Uani 1 1 d . . . . .
H3 H 0.768652 0.482249 0.500730 0.024 Uiso 1 1 calc R U . . .
C4 C 0.6798(3) 0.3507(2) 0.40915(12) 0.0185(4) Uani 1 1 d . . . . .
C5 C 0.6501(3) 0.2274(2) 0.39160(13) 0.0194(4) Uani 1 1 d . . . . .
H5 H 0.604365 0.194882 0.337361 0.023 Uiso 1 1 calc R U . . .
C6 C 0.6872(3) 0.15281(19) 0.45302(12) 0.0179(4) Uani 1 1 d . . . . .
H6 H 0.664850 0.068786 0.440677 0.021 Uiso 1 1 calc R U . . .
C7 C 0.7573(3) 0.19886(19) 0.53332(12) 0.0158(4) Uani 1 1 d . . . . .
C8 C 0.8096(3) 0.12004(19) 0.59818(12) 0.0161(4) Uani 1 1 d . . . . .
C9 C 0.7837(3) -0.2371(2) 0.54999(13) 0.0216(4) Uani 1 1 d . . . . .
H9A H 0.702543 -0.195971 0.513484 0.032 Uiso 1 1 calc R U . . .
H9B H 0.705313 -0.318488 0.558108 0.032 Uiso 1 1 calc R U . . .
H9C H 0.900721 -0.242438 0.525805 0.032 Uiso 1 1 calc R U . . .
C10 C 0.8483(3) -0.16739(18) 0.63018(12) 0.0161(4) Uani 1 1 d . . . . .
C11 C 0.9266(3) -0.22367(18) 0.70304(12) 0.0162(4) Uani 1 1 d . . . . .
C12 C 0.9411(3) -0.34303(19) 0.70128(13) 0.0204(4) Uani 1 1 d . . . . .
H12 H 0.888695 -0.394647 0.653802 0.025 Uiso 1 1 calc R U . . .
C13 C 1.0337(4) -0.3848(2) 0.77020(14) 0.0227(4) Uani 1 1 d . . . . .
H13 H 1.044851 -0.465783 0.770341 0.027 Uiso 1 1 calc R U . . .
C14 C 1.1096(3) -0.3082(2) 0.83873(13) 0.0206(4) Uani 1 1 d . . . . .
H14 H 1.176693 -0.334968 0.885726 0.025 Uiso 1 1 calc R U . . .
C15 C 1.0857(3) -0.19087(18) 0.83751(12) 0.0161(4) Uani 1 1 d . . . . .
C16 C 1.1629(3) -0.10217(19) 0.90749(12) 0.0159(4) Uani 1 1 d . . . . .
C17 C 1.2683(3) -0.1362(2) 0.98450(13) 0.0202(4) Uani 1 1 d . . . . .
H17A H 1.400965 -0.141805 0.976078 0.030 Uiso 1 1 calc R U . . .
H17B H 1.192850 -0.214410 1.000072 0.030 Uiso 1 1 calc R U . . .
H17C H 1.280328 -0.074656 1.027888 0.030 Uiso 1 1 calc R U . . .
C18 C 1.1653(3) 0.19337(18) 0.93510(12) 0.0155(3) Uani 1 1 d . . . . .
C19 C 1.2360(3) 0.29611(18) 0.99649(12) 0.0161(4) Uani 1 1 d . . . . .
C20 C 1.3294(3) 0.28111(19) 1.07467(12) 0.0178(4) Uani 1 1 d . . . . .
H20 H 1.352254 0.204892 1.087959 0.021 Uiso 1 1 calc R U . . .
C21 C 1.3884(3) 0.37612(19) 1.13245(12) 0.0189(4) Uani 1 1 d . . . . .
H21 H 1.453376 0.365353 1.184903 0.023 Uiso 1 1 calc R U . . .
C22 C 1.3528(3) 0.48800(19) 1.11387(13) 0.0181(4) Uani 1 1 d . . . . .
C23 C 1.2637(3) 0.5048(2) 1.03626(13) 0.0208(4) Uani 1 1 d . . . . .
H23 H 1.241980 0.581320 1.023003 0.025 Uiso 1 1 calc R U . . .
C24 C 1.2065(3) 0.40916(19) 0.97819(12) 0.0185(4) Uani 1 1 d . . . . .
H24 H 1.146199 0.421051 0.925134 0.022 Uiso 1 1 calc R U . . .
C25 C 1.3654(4) 0.6885(2) 1.16082(16) 0.0310(5) Uani 1 1 d . . . . .
H25A H 1.445594 0.729591 1.120938 0.047 Uiso 1 1 calc R U . . .
H25B H 1.396957 0.738333 1.211792 0.047 Uiso 1 1 calc R U . . .
H25C H 1.224236 0.675874 1.139482 0.047 Uiso 1 1 calc R U . . .
C26 C 1.3148(4) 0.1358(2) 0.65411(14) 0.0262(5) Uani 1 1 d . . . . .
H26A H 1.232885 0.081789 0.609132 0.039 Uiso 1 1 calc R U . . .
H26B H 1.455121 0.139953 0.652768 0.039 Uiso 1 1 calc R U . . .
H26C H 1.292785 0.216712 0.648547 0.039 Uiso 1 1 calc R U . . .
 
loop_
 _atom_site_aniso_label
 _atom_site_aniso_U_11
 _atom_site_aniso_U_22
 _atom_site_aniso_U_33
 _atom_site_aniso_U_23
 _atom_site_aniso_U_13
 _atom_site_aniso_U_12
Er1 0.01692(4) 0.01597(5) 0.01310(4) -0.00022(3) 0.00000(3) 0.00654(3)
Cl1 0.0189(2) 0.0259(3) 0.0219(2) 0.00390(19) 0.00354(18) 0.00933(19)
O1 0.0253(8) 0.0188(7) 0.0147(7) -0.0011(6) -0.0019(6) 0.0081(6)
O2 0.0249(8) 0.0178(7) 0.0154(7) 0.0001(5) -0.0026(6) 0.0103(6)
O3 0.0354(9) 0.0230(8) 0.0172(7) 0.0023(6) -0.0027(6) 0.0116(7)
O4 0.0366(9) 0.0188(8) 0.0197(7) -0.0057(6) -0.0099(7) 0.0108(7)
O5 0.0185(7) 0.0301(9) 0.0198(7) 0.0084(6) 0.0046(6) 0.0115(6)
N1 0.0175(8) 0.0188(8) 0.0146(7) 0.0016(6) -0.0007(6) 0.0063(6)
N2 0.0154(8) 0.0177(8) 0.0150(7) 0.0024(6) 0.0002(6) 0.0065(6)
N3 0.0157(7) 0.0168(8) 0.0142(7) 0.0004(6) 0.0021(6) 0.0059(6)
N4 0.0190(8) 0.0162(8) 0.0157(8) -0.0008(6) 0.0008(6) 0.0072(6)
N5 0.0214(8) 0.0176(8) 0.0159(8) -0.0025(6) -0.0019(6) 0.0078(7)
C1 0.0436(15) 0.0217(11) 0.0247(11) 0.0022(9) -0.0062(10) 0.0116(10)
C2 0.0197(9) 0.0203(10) 0.0161(9) -0.0015(7) -0.0011(7) 0.0062(8)
C3 0.0225(10) 0.0178(9) 0.0188(9) -0.0001(8) -0.0011(8) 0.0058(8)
C4 0.0171(9) 0.0220(10) 0.0165(9) 0.0022(8) -0.0003(7) 0.0063(7)
C5 0.0198(9) 0.0220(10) 0.0155(9) -0.0022(8) -0.0016(7) 0.0061(8)
C6 0.0179(9) 0.0174(9) 0.0177(9) -0.0009(7) 0.0005(7) 0.0045(7)
C7 0.0132(8) 0.0186(9) 0.0156(9) 0.0008(7) 0.0008(7) 0.0046(7)
C8 0.0131(8) 0.0200(9) 0.0153(9) 0.0008(7) 0.0003(7) 0.0051(7)
C9 0.0232(10) 0.0238(10) 0.0178(9) -0.0047(8) 0.0011(8) 0.0073(8)
C10 0.0146(8) 0.0173(9) 0.0160(9) -0.0015(7) 0.0015(7) 0.0035(7)
C11 0.0169(9) 0.0161(9) 0.0159(9) 0.0002(7) 0.0038(7) 0.0041(7)
C12 0.0257(10) 0.0174(9) 0.0187(9) -0.0020(8) 0.0033(8) 0.0066(8)
C13 0.0309(11) 0.0169(10) 0.0226(10) -0.0008(8) 0.0040(9) 0.0104(8)
C14 0.0264(11) 0.0193(10) 0.0187(9) 0.0029(8) 0.0034(8) 0.0106(8)
C15 0.0168(9) 0.0172(9) 0.0155(9) 0.0000(7) 0.0025(7) 0.0065(7)
C16 0.0162(9) 0.0184(9) 0.0146(8) 0.0023(7) 0.0027(7) 0.0068(7)
C17 0.0231(10) 0.0221(10) 0.0167(9) 0.0020(8) 0.0001(8) 0.0096(8)
C18 0.0146(8) 0.0181(9) 0.0144(8) 0.0000(7) 0.0013(7) 0.0059(7)
C19 0.0171(9) 0.0166(9) 0.0150(8) -0.0003(7) 0.0009(7) 0.0057(7)
C20 0.0211(9) 0.0172(9) 0.0161(9) 0.0011(7) 0.0000(7) 0.0084(7)
C21 0.0223(10) 0.0193(10) 0.0153(9) -0.0002(7) -0.0020(7) 0.0087(8)
C22 0.0191(9) 0.0168(9) 0.0172(9) -0.0018(7) -0.0017(7) 0.0048(7)
C23 0.0258(10) 0.0173(9) 0.0187(9) 0.0002(8) -0.0036(8) 0.0084(8)
C24 0.0218(10) 0.0179(9) 0.0151(9) 0.0009(7) -0.0031(7) 0.0069(8)
C25 0.0407(14) 0.0180(10) 0.0312(12) -0.0073(9) -0.0110(10) 0.0111(10)
C26 0.0294(12) 0.0288(12) 0.0218(10) 0.0033(9) 0.0078(9) 0.0078(9)
 
_geom_special_details
;
 All esds (except the esd in the dihedral angle between two l.s. planes)
 are estimated using the full covariance matrix.  The cell esds are taken
 into account individually in the estimation of esds in distances, angles
 and torsion angles; correlations between esds in cell parameters are only
 used when they are defined by crystal symmetry.  An approximate (isotropic)
 treatment of cell esds is used for estimating esds involving l.s. planes.
;
 
loop_
 _geom_bond_atom_site_label_1
 _geom_bond_atom_site_label_2
 _geom_bond_distance
 _geom_bond_site_symmetry_2
 _geom_bond_publ_flag
Er1 O2 2.2422(15) . ?
Er1 O1 2.2438(15) . ?
Er1 O5 2.3285(16) . ?
Er1 N4 2.4014(17) . ?
Er1 N2 2.4180(17) . ?
Er1 N3 2.4312(17) . ?
Er1 Cl1 2.6009(5) . ?
O1 C8 1.297(2) . ?
O2 C18 1.295(2) . ?
O3 C4 1.358(2) . ?
O3 C1 1.426(3) . ?
O4 C22 1.361(2) . ?
O4 C25 1.431(3) . ?
O5 C26 1.429(3) . ?
N1 C8 1.327(3) . ?
N1 N2 1.389(2) . ?
N2 C10 1.296(3) . ?
N3 C11 1.348(3) . ?
N3 C15 1.352(3) . ?
N4 C16 1.294(3) . ?
N4 N5 1.381(2) . ?
N5 C18 1.322(3) . ?
C2 C3 1.393(3) . ?
C2 C7 1.395(3) . ?
C3 C4 1.391(3) . ?
C4 C5 1.395(3) . ?
C5 C6 1.380(3) . ?
C6 C7 1.401(3) . ?
C7 C8 1.482(3) . ?
C9 C10 1.494(3) . ?
C10 C11 1.482(3) . ?
C11 C12 1.396(3) . ?
C12 C13 1.388(3) . ?
C13 C14 1.384(3) . ?
C14 C15 1.395(3) . ?
C15 C16 1.480(3) . ?
C16 C17 1.494(3) . ?
C18 C19 1.483(3) . ?
C19 C24 1.393(3) . ?
C19 C20 1.404(3) . ?
C20 C21 1.381(3) . ?
C21 C22 1.397(3) . ?
C22 C23 1.390(3) . ?
C23 C24 1.390(3) . ?
 
loop_
 _geom_angle_atom_site_label_1
 _geom_angle_atom_site_label_2
 _geom_angle_atom_site_label_3
 _geom_angle
 _geom_angle_site_symmetry_1
 _geom_angle_site_symmetry_3
 _geom_angle_publ_flag
O2 Er1 O1 94.91(5) . . ?
O2 Er1 O5 90.43(6) . . ?
O1 Er1 O5 85.53(6) . . ?
O2 Er1 N4 66.54(6) . . ?
O1 Er1 N4 157.51(6) . . ?
O5 Er1 N4 82.16(6) . . ?
O2 Er1 N2 159.91(6) . . ?
O1 Er1 N2 66.31(6) . . ?
O5 Er1 N2 81.39(6) . . ?
N4 Er1 N2 129.59(6) . . ?
O2 Er1 N3 131.81(5) . . ?
O1 Er1 N3 130.78(5) . . ?
O5 Er1 N3 80.41(6) . . ?
N4 Er1 N3 65.36(6) . . ?
N2 Er1 N3 65.05(6) . . ?
O2 Er1 Cl1 100.60(4) . . ?
O1 Er1 Cl1 94.96(4) . . ?
O5 Er1 Cl1 168.87(5) . . ?
N4 Er1 Cl1 100.73(4) . . ?
N2 Er1 Cl1 88.61(4) . . ?
N3 Er1 Cl1 90.98(4) . . ?
C8 O1 Er1 120.13(13) . . ?
C18 O2 Er1 119.68(13) . . ?
C4 O3 C1 118.15(17) . . ?
C22 O4 C25 117.79(17) . . ?
C26 O5 Er1 128.03(14) . . ?
C8 N1 N2 109.16(16) . . ?
C10 N2 N1 117.78(17) . . ?
C10 N2 Er1 123.71(13) . . ?
N1 N2 Er1 118.50(12) . . ?
C11 N3 C15 119.54(17) . . ?
C11 N3 Er1 120.44(13) . . ?
C15 N3 Er1 120.03(13) . . ?
C16 N4 N5 117.49(17) . . ?
C16 N4 Er1 123.91(14) . . ?
N5 N4 Er1 118.57(12) . . ?
C18 N5 N4 109.55(16) . . ?
C3 C2 C7 121.07(19) . . ?
C4 C3 C2 119.6(2) . . ?
O3 C4 C3 124.8(2) . . ?
O3 C4 C5 115.27(18) . . ?
C3 C4 C5 119.91(19) . . ?
C6 C5 C4 119.99(19) . . ?
C5 C6 C7 121.11(19) . . ?
C2 C7 C6 118.27(19) . . ?
C2 C7 C8 120.63(18) . . ?
C6 C7 C8 121.05(19) . . ?
O1 C8 N1 125.76(18) . . ?
O1 C8 C7 118.04(18) . . ?
N1 C8 C7 116.17(17) . . ?
N2 C10 C11 114.60(17) . . ?
N2 C10 C9 124.67(19) . . ?
C11 C10 C9 120.65(18) . . ?
N3 C11 C12 121.52(19) . . ?
N3 C11 C10 115.72(18) . . ?
C12 C11 C10 122.65(18) . . ?
C13 C12 C11 118.7(2) . . ?
C14 C13 C12 119.8(2) . . ?
C13 C14 C15 118.8(2) . . ?
N3 C15 C14 121.56(19) . . ?
N3 C15 C16 115.69(17) . . ?
C14 C15 C16 122.73(18) . . ?
N4 C16 C15 114.82(18) . . ?
N4 C16 C17 124.51(19) . . ?
C15 C16 C17 120.66(18) . . ?
O2 C18 N5 125.65(19) . . ?
O2 C18 C19 118.87(18) . . ?
N5 C18 C19 115.49(17) . . ?
C24 C19 C20 118.58(19) . . ?
C24 C19 C18 120.45(18) . . ?
C20 C19 C18 120.95(18) . . ?
C21 C20 C19 120.62(19) . . ?
C20 C21 C22 120.10(19) . . ?
O4 C22 C23 124.28(19) . . ?
O4 C22 C21 115.80(18) . . ?
C23 C22 C21 119.92(19) . . ?
C24 C23 C22 119.64(19) . . ?
C23 C24 C19 121.11(19) . . ?
 
_refine_diff_density_max    1.476
_refine_diff_density_min   -1.098
_refine_diff_density_rms    0.111

_shelx_res_file
;
TITL 2man in P1
    2016.res
    created by SHELXL-2016/6 at 14:38:11 on 28-Feb-2019
CELL  0.71073   7.03382  11.4540  16.6083   90.8970   98.0629  104.4169
ZERR     2.00   0.00010   0.0003   0.0004    0.0019    0.0015    0.0016
LATT  1
SFAC  C    H   CL  ER  N    O
UNIT  52   54  2   2   10   10
MERG   2
FMAP   2
PLAN   20
temp -123
acta 62
omit    -3   1   4
omit     2  -6   6
omit    -3   0   4
omit     2  -4   4
omit     1  -3   9
omit     2  -5   6
omit     1  -1   1
omit    -2   2   4
omit     0  -4  11
omit    -3   0   2
omit     0  -3   7
omit     3  -3   2
omit     1  -3  11
omit    -3   4   7
omit     3  -4   4
omit     0   3   0
omit    -2   0   2
size 0.041 0.213 0.471
L.S.  10
WGHT    0.022000    1.279100
FVAR       2.37216
MOLE    1
ER1   4    0.952131    0.054146    0.773042    11.00000    0.01692    0.01597 =
         0.01310   -0.00022    0.00000    0.00654
CL1   3    0.589948   -0.024204    0.802686    11.00000    0.01894    0.02588 =
         0.02191    0.00390    0.00354    0.00933
O1    6    0.874290    0.168248    0.671193    11.00000    0.02526    0.01884 =
         0.01471   -0.00110   -0.00190    0.00808
O2    6    1.066550    0.208888    0.865979    11.00000    0.02495    0.01780 =
         0.01545    0.00009   -0.00258    0.01035
O3    6    0.633333    0.415424    0.344851    11.00000    0.03535    0.02296 =
         0.01719    0.00227   -0.00270    0.01159
O4    6    1.408334    0.574390    1.175766    11.00000    0.03656    0.01882 =
         0.01968   -0.00568   -0.00988    0.01082
O5    6    1.261552    0.090748    0.729792    11.00000    0.01847    0.03006 =
         0.01982    0.00842    0.00455    0.01155
H5A   2    1.332147    0.056847    0.745735    11.00000   -1.50000
N1    5    0.790409    0.005732    0.575165    11.00000    0.01750    0.01882 =
         0.01456    0.00165   -0.00075    0.00626
N2    5    0.851338   -0.054770    0.641860    11.00000    0.01543    0.01766 =
         0.01496    0.00240    0.00020    0.00650
N3    5    0.994177   -0.150168    0.770683    11.00000    0.01571    0.01680 =
         0.01421    0.00044    0.00208    0.00589
N4    5    1.134563    0.003891    0.895176    11.00000    0.01903    0.01621 =
         0.01566   -0.00075    0.00080    0.00718
N5    5    1.209376    0.091775    0.957358    11.00000    0.02137    0.01759 =
         0.01587   -0.00251   -0.00186    0.00781
C1    1    0.652946    0.541236    0.359188    11.00000    0.04356    0.02166 =
         0.02466    0.00217   -0.00617    0.01161
AFIX 137
H1A   2    0.566356    0.552636    0.398402    11.00000   -1.50000
H1B   2    0.614857    0.576388    0.307882    11.00000   -1.50000
H1C   2    0.791105    0.581147    0.381132    11.00000   -1.50000
AFIX   0
C2    1    0.784681    0.322113    0.550109    11.00000    0.01969    0.02030 =
         0.01606   -0.00148   -0.00108    0.00619
AFIX  43
H2    2    0.829297    0.354654    0.604408    11.00000   -1.20000
AFIX   0
C3    1    0.747655    0.398281    0.488554    11.00000    0.02249    0.01776 =
         0.01877   -0.00015   -0.00106    0.00577
AFIX  43
H3    2    0.768652    0.482249    0.500730    11.00000   -1.20000
AFIX   0
C4    1    0.679760    0.350706    0.409148    11.00000    0.01711    0.02196 =
         0.01651    0.00219   -0.00028    0.00629
C5    1    0.650104    0.227443    0.391600    11.00000    0.01979    0.02200 =
         0.01554   -0.00219   -0.00156    0.00608
AFIX  43
H5    2    0.604365    0.194882    0.337361    11.00000   -1.20000
AFIX   0
C6    1    0.687205    0.152814    0.453022    11.00000    0.01788    0.01741 =
         0.01773   -0.00088    0.00049    0.00446
AFIX  43
H6    2    0.664850    0.068786    0.440677    11.00000   -1.20000
AFIX   0
C7    1    0.757316    0.198862    0.533322    11.00000    0.01318    0.01860 =
         0.01557    0.00078    0.00083    0.00463
C8    1    0.809600    0.120039    0.598177    11.00000    0.01306    0.01999 =
         0.01529    0.00083    0.00031    0.00506
C9    1    0.783657   -0.237069    0.549993    11.00000    0.02322    0.02380 =
         0.01779   -0.00466    0.00105    0.00732
AFIX 137
H9A   2    0.702543   -0.195971    0.513484    11.00000   -1.50000
H9B   2    0.705313   -0.318488    0.558108    11.00000   -1.50000
H9C   2    0.900721   -0.242438    0.525805    11.00000   -1.50000
AFIX   0
C10   1    0.848307   -0.167391    0.630179    11.00000    0.01456    0.01730 =
         0.01596   -0.00149    0.00146    0.00348
C11   1    0.926561   -0.223667    0.703036    11.00000    0.01689    0.01607 =
         0.01586    0.00020    0.00376    0.00414
C12   1    0.941126   -0.343026    0.701276    11.00000    0.02567    0.01742 =
         0.01873   -0.00197    0.00326    0.00656
AFIX  43
H12   2    0.888695   -0.394647    0.653802    11.00000   -1.20000
AFIX   0
C13   1    1.033659   -0.384823    0.770199    11.00000    0.03095    0.01693 =
         0.02259   -0.00076    0.00396    0.01038
AFIX  43
H13   2    1.044851   -0.465783    0.770341    11.00000   -1.20000
AFIX   0
C14   1    1.109582   -0.308179    0.838729    11.00000    0.02640    0.01926 =
         0.01869    0.00287    0.00343    0.01063
AFIX  43
H14   2    1.176693   -0.334968    0.885726    11.00000   -1.20000
AFIX   0
C15   1    1.085729   -0.190867    0.837507    11.00000    0.01676    0.01725 =
         0.01554    0.00003    0.00254    0.00646
C16   1    1.162904   -0.102173    0.907494    11.00000    0.01615    0.01843 =
         0.01456    0.00234    0.00273    0.00681
C17   1    1.268324   -0.136185    0.984503    11.00000    0.02310    0.02213 =
         0.01671    0.00198    0.00007    0.00964
AFIX 137
H17A  2    1.400965   -0.141805    0.976078    11.00000   -1.50000
H17B  2    1.192850   -0.214410    1.000072    11.00000   -1.50000
H17C  2    1.280328   -0.074656    1.027888    11.00000   -1.50000
AFIX   0
C18   1    1.165349    0.193370    0.935101    11.00000    0.01460    0.01809 =
         0.01438   -0.00003    0.00125    0.00587
C19   1    1.235978    0.296109    0.996490    11.00000    0.01709    0.01656 =
         0.01503   -0.00032    0.00094    0.00571
C20   1    1.329414    0.281107    1.074671    11.00000    0.02109    0.01724 =
         0.01609    0.00107   -0.00005    0.00844
AFIX  43
H20   2    1.352254    0.204892    1.087959    11.00000   -1.20000
AFIX   0
C21   1    1.388446    0.376121    1.132450    11.00000    0.02231    0.01930 =
         0.01530   -0.00017   -0.00205    0.00866
AFIX  43
H21   2    1.453376    0.365353    1.184903    11.00000   -1.20000
AFIX   0
C22   1    1.352812    0.487996    1.113868    11.00000    0.01907    0.01684 =
         0.01717   -0.00178   -0.00175    0.00484
C23   1    1.263667    0.504831    1.036264    11.00000    0.02581    0.01732 =
         0.01866    0.00023   -0.00357    0.00839
AFIX  43
H23   2    1.241980    0.581320    1.023003    11.00000   -1.20000
AFIX   0
C24   1    1.206453    0.409158    0.978195    11.00000    0.02176    0.01795 =
         0.01509    0.00087   -0.00306    0.00685
AFIX  43
H24   2    1.146199    0.421051    0.925134    11.00000   -1.20000
AFIX   0
C25   1    1.365396    0.688543    1.160816    11.00000    0.04068    0.01799 =
         0.03118   -0.00728   -0.01105    0.01109
AFIX 137
H25A  2    1.445594    0.729591    1.120938    11.00000   -1.50000
H25B  2    1.396957    0.738333    1.211792    11.00000   -1.50000
H25C  2    1.224236    0.675874    1.139482    11.00000   -1.50000
AFIX   0
C26   1    1.314767    0.135844    0.654113    11.00000    0.02939    0.02879 =
         0.02178    0.00332    0.00783    0.00780
AFIX 137
H26A  2    1.232885    0.081789    0.609132    11.00000   -1.50000
H26B  2    1.455121    0.139953    0.652768    11.00000   -1.50000
H26C  2    1.292785    0.216712    0.648547    11.00000   -1.50000
AFIX   0
HKLF    4


REM  2man in P1
REM R1 =  0.0241 for    8134 Fo > 4sig(Fo)  and  0.0287 for all    8819 data
REM    351 parameters refined using      0 restraints

END

WGHT      0.0223      0.6610

REM Highest difference peak  1.476,  deepest hole -1.098,  1-sigma level  0.111
Q1    1   1.0579  0.0715  0.7664  11.00000  0.05    1.48
Q2    1   0.9484  0.1199  0.7711  11.00000  0.05    0.89
Q3    1   1.1561 -0.1624  0.6791  11.00000  0.05    0.85
Q4    1   0.8453  0.0613  0.8114  11.00000  0.05    0.84
Q5    1   0.8916 -0.0129  0.7381  11.00000  0.05    0.78
Q6    1   0.8698 -0.0189  0.6729  11.00000  0.05    0.73
Q7    1   1.0285  0.1147  0.8198  11.00000  0.05    0.71
Q8    1   0.8726 -0.0247  0.7984  11.00000  0.05    0.69
Q9    1   1.1299  0.0016  0.8335  11.00000  0.05    0.65
Q10   1   0.8308  0.0592  0.7481  11.00000  0.05    0.64
Q11   1   0.8151  0.0059  0.7723  11.00000  0.05    0.62
Q12   1   1.0349 -0.1740  0.8008  11.00000  0.05    0.60
Q13   1   0.9710 -0.0073  0.7780  11.00000  0.05    0.60
Q14   1   0.9900 -0.0821  0.8036  11.00000  0.05    0.59
Q15   1   1.0537 -0.0008  0.8713  11.00000  0.05    0.58
Q16   1   1.0504 -0.3545  0.8061  11.00000  0.05    0.56
Q17   1   1.1162 -0.2454  0.8382  11.00000  0.05    0.56
Q18   1   0.6694  0.2935  0.4066  11.00000  0.05    0.54
Q19   1   0.5991  0.0394  0.7356  11.00000  0.05    0.51
Q20   1   0.7823  0.2573  0.5357  11.00000  0.05    0.49
;
_shelx_res_checksum    7867

_shelx_hkl_file
;
 -10   0   0 4491.43 454.738   3
 -10   0   1 345.612 207.764   3
 -10   0   2 4167.33 448.927   3
 -10   0   3 55.8310 201.500   1
 -10   0   4 3641.61 459.039   1
 -10   0   5-365.659 254.482   1
 -10   1  -2 6266.14 562.372   3
 -10   1  -1 107.284 129.134   3
 -10   1   0 3652.70 419.288   3
 -10   1   1 38.1953 141.116   3
 -10   1   2 2937.77 404.959   1
 -10   1   2 3420.11 392.518   3
 -10   1   3-11.9892 149.190   1
 -10   1   3 1424.04 248.963   3
 -10   1   4 1014.08 270.369   1
 -10   1   5 950.690 239.154   1
 -10   1   6 2677.39 400.619   1
 -10   1   7 2770.02 404.757   1
 -10   2  -2 5700.54 542.329   3
 -10   2  -1 1412.12 278.825   3
 -10   2   0 1886.31 307.320   3
 -10   2   1 1594.66 296.466   3
 -10   2   1 1509.07 290.578   1
 -10   2   2 1022.00 226.866   1
 -10   2   2 1458.27 339.769   2
 -10   2   2 793.963 217.960   3
 -10   2   3 2430.59 409.986   2
 -10   2   3 2241.12 314.046   3
 -10   2   3 2109.38 332.944   1
 -10   2   4 865.579 199.008   3
 -10   2   4 423.499 173.269   1
 -10   2   4 666.068 251.718   2
 -10   2   5 3412.07 426.014   1
 -10   2   6 660.416 229.945   1
 -10   2   7 3366.79 425.485   1
 -10   2   8 37.6818 168.757   1
 -10   2   9 6506.35 604.027   1
 -10   3  -2 4616.76 473.125   3
 -10   3  -1 4074.05 449.568   3
 -10   3  -1 3476.92 481.586   2
 -10   3   0 312.113 206.401   3
 -10   3   0 790.832 267.651   2
 -10   3   0 289.539 174.322   1
 -10   3   1 3345.56 400.976   1
 -10   3   1 3127.40 391.678   3
 -10   3   1 4136.01 512.185   2
 -10   3   2 93.3369 163.823   1
 -10   3   2 250.991 175.834   3
 -10   3   2 282.828 185.465   2
 -10   3   3 6001.60 614.773   2
 -10   3   3 5929.63 525.093   1
 -10   3   3 5816.52 511.299   3
 -10   3   4 763.559 231.668   1
 -10   3   4 129.347 141.900   3
 -10   3   4 678.370 268.351   2
 -10   3   5 3259.25 398.366   1
 -10   3   5 4066.47 419.170   3
 -10   3   6-294.154 214.869   1
 -10   3   7 5361.17 523.109   1
 -10   3   8 245.723 182.844   1
 -10   3   9 2775.00 395.355   1
 -10   3  10 1374.32 302.468   1
 -10   4  -2 1539.61 292.641   3
 -10   4  -2 1975.55 369.683   2
 -10   4  -1 5436.01 545.119   2
 -10   4  -1 4919.92 485.563   3
 -10   4   0 124.281 205.554   2
 -10   4   0 527.233 208.216   1
 -10   4   0 128.508 211.621   3
 -10   4   1 4023.94 409.293   1
 -10   4   1 4405.00 468.643   3
 -10   4   1 4626.47 516.957   2
 -10   4   2 58.9139 200.469   3
 -10   4   2-156.765 216.560   1
 -10   4   2 126.030 212.506   2
 -10   4   3 7254.41 571.934   1
 -10   4   3 7334.39 652.028   2
 -10   4   3 6577.54 541.795   3
 -10   4   4 535.919 199.757   3
 -10   4   4 350.511 191.504   1
 -10   4   5 3330.99 399.120   3
 -10   4   5 3366.63 396.529   1
 -10   4   6 1444.84 286.207   1
 -10   4   6 1186.80 233.331   3
 -10   4   7 2602.38 371.731   1
 -10   4   8 546.883 236.217   1
 -10   4   9 1715.11 326.864   1
 -10   4  10 2241.31 358.825   1
 -10   4  11 675.042 241.529   1
 -10   5  -3 8270.37 696.881   2
 -10   5  -2-276.608 238.307   3
 -10   5  -2 504.030 215.804   2
 -10   5  -1 6215.22 551.610   3
 -10   5  -1 6234.59 587.733   2
 -10   5   0 36.4187 168.407   3
 -10   5   0 602.989 220.087   2
 -10   5   1 3088.84 387.022   3
 -10   5   1 4093.72 476.147   2
 -10   5   2 920.555 224.365   3
 -10   5   2 902.587 238.774   2
 -10   5   3 4900.08 444.368   1
 -10   5   3 5392.35 506.174   3
 -10   5   4 1251.58 267.772   3
 -10   5   4 1181.82 239.034   1
 -10   5   5 2214.71 323.122   3
 -10   5   5 2693.92 347.743   1
 -10   5   6 2580.04 356.223   1
 -10   5   6 2118.52 332.053   3
 -10   5   7 3046.60 388.356   1
 -10   5   7 2478.84 338.017   3
 -10   5   8 2402.07 352.236   1
 -10   5   9 108.484 191.245   1
 -10   5  10 2837.71 392.909   1
 -10   5  11-608.220 217.470   1
 -10   6  -4 505.736 275.955   2
 -10   6  -3 7405.49 634.240   2
 -10   6  -2 68.7463 179.591   2
 -10   6  -1 3915.63 446.191   3
 -10   6  -1 4462.71 499.763   2
 -10   6   0 643.043 244.764   2
 -10   6   0 278.851 166.420   3
 -10   6   1 9515.63 724.231   2
 -10   6   1 9370.83 695.931   3
 -10   6   2 7622.06 609.661   3
 -10   6   3 103.428 136.292   3
 -10   6   4 4985.80 485.483   3
 -10   6   5 262.199 163.320   3
 -10   6   6 2961.28 373.572   3
 -10   6   7 183.473 177.878   1
 -10   6   7 250.590 166.529   3
 -10   6   8 3558.67 409.970   3
 -10   6   8 4258.30 452.109   1
 -10   6   9-27.1921 173.442   1
 -10   6  10 3857.75 422.909   1
 -10   6  11 380.263 193.615   1
 -10   6  12 2668.93 388.287   1
 -10   7  -4-288.587 216.728   2
 -10   7  -3 6586.39 607.816   2
 -10   7  -2 1704.26 293.695   2
 -10   7  -1 5859.91 574.570   2
 -10   7   0 5062.78 520.568   3
 -10   7   1 3478.92 437.850   3
 -10   7   2 12052.2 790.832   3
 -10   7   3 253.889 198.507   3
 -10   7   4 9406.17 673.615   3
 -10   7   5 0.22898 138.495   3
 -10   7   6 6298.96 556.664   3
 -10   7   7 614.195 231.486   3
 -10   7   8 5824.40 529.389   3
 -10   8  -3 3181.24 447.635   2
 -10   8  -2 1935.50 323.918   2
 -10   8   2 9832.90 724.771   3
 -10   8   3 343.397 214.827   3
 -10   8   4 6298.02 568.505   3
 -10   8   5 705.074 217.264   3
 -10   8   6 4468.23 486.768   3
 -10   8   7 1691.83 326.515   3
 -10   8   8 3727.05 434.798   3
 -10   8   9 3733.45 453.388   3
 -10   9   5 3390.43 443.820   3
 -10   9   6 5275.63 536.278   3
 -10   9   7 5395.19 545.335   3
 -10   9   8 1618.31 306.082   3
  -9  -4   2-269.867 245.293   2
  -9  -4   3 5998.50 673.742   2
  -9  -4   4 1229.76 325.502   2
  -9  -4   5 2605.96 480.539   2
  -9  -4   6 200.468 206.344   2
  -9  -3  -1 1079.26 358.214   2
  -9  -3   0-428.071 281.961   2
  -9  -3   1 2846.14 482.339   2
  -9  -3   2 606.192 232.607   2
  -9  -3   3 4337.00 568.718   2
  -9  -3   4 1221.40 349.155   2
  -9  -3   5 2811.07 475.501   2
  -9  -3   6 2263.51 392.247   1
  -9  -3   6 3190.27 504.376   2
  -9  -3   7 1500.47 332.469   1
  -9  -3   8 2048.45 391.828   1
  -9  -2  -3 7792.40 768.466   2
  -9  -2  -2 466.751 278.571   2
  -9  -2  -1 2128.45 436.101   2
  -9  -2   0 2738.85 471.455   2
  -9  -2   1 3278.75 508.141   2
  -9  -2   2 1399.77 349.858   2
  -9  -2   3 1288.32 358.516   2
  -9  -2   4 2543.66 464.294   2
  -9  -2   5 704.853 223.759   1
  -9  -2   5 926.474 302.522   2
  -9  -2   6 4111.93 502.659   1
  -9  -2   6 4185.13 543.630   2
  -9  -2   7 210.371 203.851   1
  -9  -2   8 4664.73 553.737   1
  -9  -2   9-45.2919 186.027   1
  -9  -2  10 6682.52 640.693   1
  -9  -1  -4-249.608 176.974   2
  -9  -1  -3 4374.47 564.837   2
  -9  -1  -2 2323.04 407.081   2
  -9  -1  -1 3260.51 491.670   2
  -9  -1   0 3808.76 528.559   2
  -9  -1   1 627.110 284.740   2
  -9  -1   2 3982.87 530.048   2
  -9  -1   3 201.409 192.121   2
  -9  -1   4 4920.05 595.576   2
  -9  -1   4 4694.18 414.491   3
  -9  -1   5 88.7658 181.034   1
  -9  -1   5 595.123 231.402   2
  -9  -1   6 7393.18 708.742   2
  -9  -1   6 6736.25 602.621   1
  -9  -1   7 503.874 222.238   1
  -9  -1   8 7825.36 657.439   1
  -9  -1   9 431.297 202.429   1
  -9  -1  10 1685.71 309.770   1
  -9  -1  11-63.3841 160.183   1
  -9   0  -6 1305.56 361.273   2
  -9   0  -5 3148.11 463.534   2
  -9   0  -4 2999.89 466.080   2
  -9   0  -3 2287.53 417.506   2
  -9   0  -2 7721.43 717.040   2
  -9   0  -1 1974.37 374.561   2
  -9   0   0 6579.86 640.693   2
  -9   0   1-99.2264 206.259   2
  -9   0   2 9185.10 592.438   3
  -9   0   2 9909.63 781.300   2
  -9   0   3 304.140 201.417   2
  -9   0   3 332.553 172.268   3
  -9   0   4 3957.97 445.643   1
  -9   0   4 4065.41 374.934   3
  -9   0   4 5119.32 562.979   2
  -9   0   5 293.018 179.944   1
  -9   0   5 673.136 248.762   2
  -9   0   5 752.167 175.147   3
  -9   0   6 4183.86 535.317   2
  -9   0   6 3303.13 428.405   1
  -9   0   7 3157.27 413.964   1
  -9   0   8 4162.77 464.367   1
  -9   0   9-68.1044 151.689   1
  -9   0  10 1538.47 303.309   1
  -9   0  11 2376.36 361.915   1
  -9   0  12 408.607 204.957   1
  -9   1  -7 3693.55 507.932   2
  -9   1  -6 2191.73 376.831   2
  -9   1  -5 1503.22 331.350   2
  -9   1  -4 8136.01 1344.49   2
  -9   1  -3 2099.49 354.372   2
  -9   1  -2 12247.4 853.023   2
  -9   1  -1 245.114 258.255   2
  -9   1   0 11231.3 807.679   2
  -9   1   1 435.210 167.367   3
  -9   1   1 713.331 241.393   2
  -9   1   2 4078.57 490.218   2
  -9   1   2 2871.43 334.559   3
  -9   1   3 399.200 196.971   2
  -9   1   3 325.034 106.947   3
  -9   1   4 3517.05 456.380   2
  -9   1   4 2585.08 308.467   3
  -9   1   4 2562.17 348.725   1
  -9   1   5 3629.74 417.527   1
  -9   1   5 3805.07 491.700   2
  -9   1   5 3126.67 330.371   3
  -9   1   6 1899.37 255.624   3
  -9   1   6 1528.10 258.328   1
  -9   1   7 9711.83 678.428   1
  -9   1   8 2584.84 349.943   1
  -9   1   9 2019.17 328.520   1
  -9   1  10 50.3550 156.324   1
  -9   1  11 3315.11 418.834   1
  -9   1  12 427.391 191.225   1
  -9   1  13 4879.92 516.353   1
  -9   2  -8 2347.78 429.133   2
  -9   2  -7 4610.43 525.833   2
  -9   2  -6 2420.61 406.131   2
  -9   2  -5 2379.64 386.804   2
  -9   2  -4 15583.5 931.735   2
  -9   2  -3-268.310 178.851   2
  -9   2  -2 9754.43 731.370   2
  -9   2  -1 788.003 263.845   2
  -9   2  -1 922.243 211.799   3
  -9   2   0 9087.42 606.677   3
  -9   2   0 10132.0 735.091   2
  -9   2   1 4340.78 409.020   3
  -9   2   1 4985.67 530.921   2
  -9   2   2 4485.43 486.871   2
  -9   2   2 3702.09 376.229   3
  -9   2   3 6027.28 477.020   3
  -9   2   3 7221.80 614.051   2
  -9   2   3 5733.44 472.521   1
  -9   2   4 712.938 174.453   1
  -9   2   4 1142.75 245.603   2
  -9   2   4 931.852 167.670   3
  -9   2   5 8350.24 657.786   2
  -9   2   5 8209.84 590.032   1
  -9   2   5 7469.42 506.052   3
  -9   2   6 551.529 126.187   3
  -9   2   6 964.481 237.181   1
  -9   2   7 6607.55 541.173   1
  -9   2   7 7128.87 484.329   3
  -9   2   8 389.949 180.868   1
  -9   2   9 7871.89 595.122   1
  -9   2  10 248.527 125.880   1
  -9   2  11 3450.16 418.485   1
  -9   2  12 1186.20 267.841   1
  -9   2  13 2944.77 410.556   1
  -9   2  14 780.490 246.871   1
  -9   3  -8 7359.49 670.528   2
  -9   3  -7 4859.51 513.891   2
  -9   3  -6 2364.07 383.226   2
  -9   3  -5 96.5741 202.559   2
  -9   3  -4 17173.6 952.813   2
  -9   3  -4 15504.5 858.487   3
  -9   3  -3 636.893 199.822   3
  -9   3  -3 310.577 219.727   2
  -9   3  -2 11737.1 719.374   3
  -9   3  -2 12204.1 798.439   2
  -9   3  -1 2675.66 351.005   3
  -9   3  -1 2522.52 372.262   2
  -9   3   0 4710.74 502.411   2
  -9   3   0 4559.67 426.787   3
  -9   3   1 7209.97 536.288   3
  -9   3   1 7806.16 625.808   2
  -9   3   2 5064.37 442.571   3
  -9   3   2 4801.96 427.648   1
  -9   3   2 5992.36 547.479   2
  -9   3   3 12691.9 795.717   2
  -9   3   3 11514.2 654.194   3
  -9   3   3 11080.5 657.910   1
  -9   3   4 764.817 165.229   1
  -9   3   4 1144.57 257.371   2
  -9   3   4 696.149 159.976   3
  -9   3   5 9273.89 612.854   1
  -9   3   5 9486.00 579.873   3
  -9   3   6 11.3720 111.210   3
  -9   3   6 134.376 130.420   1
  -9   3   7 10369.7 669.911   1
  -9   3   7 9738.12 580.959   3
  -9   3   8 1528.52 240.700   3
  -9   3   8 1480.97 288.917   1
  -9   3   9 8966.99 633.193   1
  -9   3  10 1528.69 315.159   1
  -9   3  11 3902.34 433.773   1
  -9   3  12 2833.28 389.316   1
  -9   3  13 719.501 234.429   1
  -9   3  14 2060.59 350.458   1
  -9   4  -9 770.315 255.178   2
  -9   4  -8 3604.56 442.907   2
  -9   4  -7 804.886 228.295   3
  -9   4  -7 1341.60 281.961   2
  -9   4  -6 6739.48 583.959   3
  -9   4  -6 8148.59 653.627   2
  -9   4  -5 220.169 163.214   3
  -9   4  -5 256.200 216.427   2
  -9   4  -4 8629.50 640.823   3
  -9   4  -4 9119.49 675.898   2
  -9   4  -3 740.006 244.552   2
  -9   4  -3 326.578 144.551   3
  -9   4  -2 7258.50 567.609   3
  -9   4  -2 6584.63 577.241   2
  -9   4  -1 3687.32 430.063   2
  -9   4  -1 3441.94 388.911   3
  -9   4   0 1124.33 208.498   1
  -9   4   0 1646.30 259.807   3
  -9   4   0 1143.82 268.968   2
  -9   4   1 11585.0 684.957   3
  -9   4   1 11323.2 638.516   1
  -9   4   1 13305.3 799.058   2
  -9   4   2 3575.31 356.948   1
  -9   4   2 4362.13 457.289   2
  -9   4   2 3880.52 382.874   3
  -9   4   3 15316.6 855.644   2
  -9   4   3 14257.8 732.738   1
  -9   4   3 14743.2 755.844   3
  -9   4   4 80.5475 155.305   2
  -9   4   4-42.5242 118.100   1
  -9   4   4 45.9830 115.471   3
  -9   4   5 10730.6 628.569   3
  -9   4   5 10955.4 654.448   1
  -9   4   6 1575.33 253.905   1
  -9   4   6 1596.70 248.641   3
  -9   4   7 8311.68 544.642   3
  -9   4   7 8377.83 595.233   1
  -9   4   8 4900.44 420.203   3
  -9   4   8 5923.86 516.042   1
  -9   4   9 1766.33 245.967   3
  -9   4   9 1754.60 292.913   1
  -9   4  10 2763.27 371.844   1
  -9   4  11 2288.82 334.231   1
  -9   4  12 4638.68 467.648   1
  -9   4  13 558.308 177.778   1
  -9   4  14 3828.34 450.243   1
  -9   4  15 203.333 183.702   1
  -9   5 -10 5308.73 551.762   2
  -9   5  -9-216.550 210.246   2
  -9   5  -8 5199.70 521.181   2
  -9   5  -7 279.716 187.410   2
  -9   5  -7-177.718 196.079   3
  -9   5  -6 5630.26 531.244   3
  -9   5  -6 6339.12 571.396   2
  -9   5  -5 581.409 176.659   3
  -9   5  -5 405.959 206.224   2
  -9   5  -4 3926.45 433.284   3
  -9   5  -4 3863.45 431.136   2
  -9   5  -3 1822.75 322.902   2
  -9   5  -3 1512.37 279.199   3
  -9   5  -2 4516.95 447.581   3
  -9   5  -2 4791.14 487.124   2
  -9   5  -1 8515.64 632.301   2
  -9   5  -1 7667.11 581.508   3
  -9   5  -1 7809.85 513.875   1
  -9   5   0 2150.60 259.456   1
  -9   5   0 3185.79 397.628   2
  -9   5   0 2920.58 362.604   3
  -9   5   1 13938.7 809.122   2
  -9   5   1 13810.2 691.755   1
  -9   5   1 12908.9 735.768   3
  -9   5   2-215.119 176.488   3
  -9   5   2 206.883 205.774   2
  -9   5   2-76.9300 175.331   1
  -9   5   3 12439.3 670.493   1
  -9   5   3 12239.7 753.299   2
  -9   5   3 11693.4 687.689   3
  -9   5   4 500.789 138.842   3
  -9   5   4 444.684 130.087   1
  -9   5   5 8955.76 585.562   3
  -9   5   5 10226.0 617.520   1
  -9   5   6 2677.22 325.861   3
  -9   5   6 2531.86 322.672   1
  -9   5   7 4272.44 403.338   3
  -9   5   7 4211.25 416.746   1
  -9   5   8 8853.54 595.530   1
  -9   5   8 8177.13 551.510   3
  -9   5   9 700.636 195.978   3
  -9   5   9 489.295 169.342   1
  -9   5  10 7975.43 603.607   1
  -9   5  11 455.147 219.677   1
  -9   5  12 7228.04 575.345   1
  -9   5  13-127.806 143.157   1
  -9   5  14 5915.90 537.632   1
  -9   5  15 664.762 218.619   1
  -9   6 -10 4266.79 463.307   2
  -9   6  -9 377.270 204.871   2
  -9   6  -8 3966.45 462.195   2
  -9   6  -7 1342.88 285.724   2
  -9   6  -7 1703.34 309.373   3
  -9   6  -6 4426.20 470.916   3
  -9   6  -6 4930.92 490.549   2
  -9   6  -5 4194.32 459.752   2
  -9   6  -5 3845.75 436.688   3
  -9   6  -4 3762.89 428.951   3
  -9   6  -4 4184.64 446.937   2
  -9   6  -3 4611.86 459.816   3
  -9   6  -3 5039.63 491.850   2
  -9   6  -2 542.113 145.613   3
  -9   6  -2 698.472 259.442   2
  -9   6  -1 4292.44 447.067   2
  -9   6  -1 3922.42 424.190   3
  -9   6   0 153.361 155.199   3
  -9   6   0 216.799 164.975   2
  -9   6   1 5914.97 521.696   2
  -9   6   1 5467.81 480.142   3
  -9   6   1 5816.50 426.168   1
  -9   6   2 1935.19 312.512   2
  -9   6   2 1871.93 254.641   1
  -9   6   2 1498.35 259.750   3
  -9   6   3 5792.93 432.088   1
  -9   6   3 5630.32 488.874   3
  -9   6   4 1231.18 224.750   1
  -9   6   4 838.207 215.475   3
  -9   6   5 8343.11 586.955   3
  -9   6   5 8719.98 564.836   1
  -9   6   6 8494.90 584.997   3
  -9   6   6 8180.17 555.403   1
  -9   6   7 2697.61 341.103   3
  -9   6   7 2695.21 336.381   1
  -9   6   8 6990.38 532.579   3
  -9   6   8 7925.38 558.592   1
  -9   6   9 314.805 168.449   3
  -9   6   9 39.1642 180.080   1
  -9   6  10 14244.7 768.174   1
  -9   6  10 13032.2 728.575   3
  -9   6  11 401.576 178.910   1
  -9   6  12 8305.06 603.016   1
  -9   6  13 784.141 224.496   1
  -9   6  14 2761.64 373.711   1
  -9   6  15 3513.08 444.472   1
  -9   7  -9 2781.03 378.592   2
  -9   7  -8 1241.98 279.387   2
  -9   7  -7 4096.06 455.127   2
  -9   7  -6 1999.95 333.694   2
  -9   7  -6 1198.88 247.803   3
  -9   7  -5 3110.36 398.754   3
  -9   7  -5 3407.00 415.477   2
  -9   7  -4 150.146 145.531   3
  -9   7  -4 379.368 148.096   2
  -9   7  -3 2036.98 307.146   2
  -9   7  -3 2011.37 317.395   3
  -9   7  -2 2317.30 323.349   3
  -9   7  -2 1812.33 323.474   2
  -9   7  -1 11336.8 730.673   3
  -9   7  -1 10481.6 698.152   2
  -9   7   0 3794.19 431.354   2
  -9   7   0 3270.90 387.102   3
  -9   7   1 6806.28 555.509   3
  -9   7   2 7225.00 572.088   3
  -9   7   3 3705.92 417.599   3
  -9   7   4 5743.36 518.619   3
  -9   7   5 3350.82 383.885   3
  -9   7   6 9426.00 572.561   1
  -9   7   6 8692.90 611.983   3
  -9   7   7 659.796 218.592   3
  -9   7   7 502.441 180.931   1
  -9   7   8 9428.85 588.028   1
  -9   7   8 9190.48 625.218   3
  -9   7   9 342.468 164.930   1
  -9   7   9 538.693 205.244   3
  -9   7  10 12881.5 716.246   1
  -9   7  10 11626.2 717.740   3
  -9   7  11 1826.60 313.541   3
  -9   7  11 1827.77 312.447   1
  -9   7  12 4727.14 458.865   1
  -9   7  13 2834.22 376.618   1
  -9   7  14 563.982 230.755   1
  -9   7  15 9505.99 678.556   1
  -9   8  -7 5443.19 525.147   2
  -9   8  -6 441.714 225.639   2
  -9   8  -5 6337.84 546.535   2
  -9   8  -5 5444.75 533.792   3
  -9   8  -4 151.673 166.640   2
  -9   8  -4 103.346 159.489   3
  -9   8  -3 4991.68 503.602   3
  -9   8  -3 4908.73 489.113   2
  -9   8  -2 426.470 173.816   3
  -9   8  -2 145.977 161.687   2
  -9   8  -1 5490.53 519.586   3
  -9   8  -1 5301.07 508.611   2
  -9   8   0 1546.60 271.188   3
  -9   8   1 7480.80 589.873   3
  -9   8   2 5294.76 503.696   3
  -9   8   3 2370.41 349.035   3
  -9   8   4 5846.63 521.228   3
  -9   8   5 985.923 237.168   3
  -9   8   6 11246.9 715.024   3
  -9   8   7 387.602 208.939   3
  -9   8   8 8076.84 607.177   3
  -9   8   9 1750.18 308.504   3
  -9   8  10 5360.34 515.628   3
  -9   8  11 3245.17 413.061   3
  -9   8  12 3099.37 391.996   1
  -9   8  13 5718.79 491.163   1
  -9   8  14 2116.44 335.312   1
  -9   9  -4 545.249 194.574   3
  -9   9  -3 1737.60 320.664   3
  -9   9  -3 1255.42 243.599   2
  -9   9  -2 3074.62 413.392   3
  -9   9  -1 1305.63 267.596   3
  -9   9   0 4887.71 496.677   3
  -9   9   1 5478.38 522.372   3
  -9   9   2 633.037 230.315   3
  -9   9   3 175.683 169.198   3
  -9   9   4 5094.73 495.393   3
  -9   9   5 240.650 195.736   3
  -9   9   6 8100.77 626.009   3
  -9   9   7 924.756 227.953   3
  -9   9   8 8157.84 628.967   3
  -9   9   9 3433.59 435.230   3
  -9   9  10 5915.43 560.015   3
  -9   9  11 8153.73 648.148   3
  -9   9  12-326.437 215.712   3
  -9  10  -2 5289.45 544.710   3
  -9  10  -1 2029.70 348.724   3
  -9  10   0 3324.82 427.786   3
  -9  10   1 39.3960 148.865   3
  -9  10   2 1782.40 315.692   3
  -9  10   3 277.509 187.047   3
  -9  10   4 7690.38 637.356   3
  -9  10   5 2973.58 411.654   3
  -9  10   6 3307.98 420.327   3
  -9  10   7 537.684 212.208   3
  -9  10   8 2723.66 355.320   3
  -9  10   9 4096.36 505.736   3
  -9  10  10 685.626 258.831   3
  -9  10  11 4559.97 522.124   3
  -9  10  12 134.921 204.581   3
  -9  11   1 1601.97 336.972   3
  -9  11   2 3957.44 481.239   3
  -9  11   3 608.450 224.349   3
  -9  11   4 750.836 238.060   3
  -9  11   5 3778.72 451.751   3
  -9  11   6 864.563 234.256   3
  -9  11   7 1788.44 339.851   3
  -9  11   8 828.579 248.596   3
  -9  11   9 3276.27 444.708   3
  -8  -8   4 4953.19 592.471   2
  -8  -8   5 1097.08 286.532   2
  -8  -8   6 2262.50 404.369   2
  -8  -7   0 2057.26 402.701   2
  -8  -7   1 110.407 186.419   2
  -8  -7   2 2910.58 454.941   2
  -8  -7   3 824.538 172.741   2
  -8  -7   4 2726.11 427.460   2
  -8  -7   5 1048.36 327.724   2
  -8  -7   6 565.310 235.556   2
  -8  -6  -3-108.928 199.410   2
  -8  -6  -2 7126.33 695.955   2
  -8  -6  -1 393.023 281.034   2
  -8  -6   0 2332.45 428.753   2
  -8  -6   1 2592.87 429.352   2
  -8  -6   2 1603.04 344.462   2
  -8  -6   3 3152.94 492.736   2
  -8  -6   4 1814.31 346.826   2
  -8  -6   5 2059.57 397.589   2
  -8  -6   6 293.902 189.053   2
  -8  -6   7 3205.75 482.994   2
  -8  -6   7 3186.07 487.518   1
  -8  -6   8 285.360 228.988   1
  -8  -5  -5 267.279 238.211   2
  -8  -5  -4 5058.73 580.531   2
  -8  -5  -3 216.944 179.595   2
  -8  -5  -2 2684.53 418.242   2
  -8  -5  -1 5744.49 622.258   2
  -8  -5   0 3826.53 541.141   2
  -8  -5   1 2612.24 425.486   2
  -8  -5   2 252.177 216.898   2
  -8  -5   3 4782.67 575.582   2
  -8  -5   4-115.801 220.654   2
  -8  -5   5 1521.02 343.291   2
  -8  -5   6 564.236 284.223   2
  -8  -5   7 4890.93 595.373   1
  -8  -5   7 5330.26 611.169   2
  -8  -5   8 242.148 205.389   1
  -8  -5   9 3161.85 491.313   1
  -8  -5  10 44.4418 194.318   1
  -8  -5  11 2486.50 403.247   1
  -8  -4  -6 10475.7 838.145   2
  -8  -4  -5 250.965 174.694   2
  -8  -4  -4 4260.66 524.083   2
  -8  -4  -3 4994.98 572.931   2
  -8  -4  -2 1150.53 310.676   2
  -8  -4  -1 3464.24 508.673   2
  -8  -4   0 1608.84 357.120   2
  -8  -4   1 6673.08 648.498   2
  -8  -4   2 412.481 244.859   2
  -8  -4   3 5692.96 601.327   2
  -8  -4   4 1044.33 300.879   2
  -8  -4   5 4085.29 531.352   2
  -8  -4   6 528.557 229.474   2
  -8  -4   7 2866.06 428.129   1
  -8  -4   7 2643.55 441.026   2
  -8  -4   8 2265.48 380.044   1
  -8  -4   9 965.231 288.064   1
  -8  -4  10 2356.63 404.456   1
  -8  -4  11 928.175 256.092   1
  -8  -4  12 2998.01 453.860   1
  -8  -3  -8 8257.07 754.070   2
  -8  -3  -7 865.329 309.462   2
  -8  -3  -6 5743.04 638.015   2
  -8  -3  -5 2465.79 406.377   2
  -8  -3  -4 1946.36 397.873   2
  -8  -3  -3 3592.55 504.369   2
  -8  -3  -2 660.256 246.117   2
  -8  -3  -1 5841.34 600.605   2
  -8  -3   0 392.357 234.003   2
  -8  -3   1 13687.5 921.782   2
  -8  -3   2 1166.03 300.592   2
  -8  -3   3 7618.18 679.548   2
  -8  -3   4 1661.07 323.720   2
  -8  -3   5 3872.83 493.952   2
  -8  -3   6 5700.32 591.265   2
  -8  -3   7 522.301 235.447   2
  -8  -3   7 149.655 216.013   1
  -8  -3   8 4678.68 524.535   1
  -8  -3   9-132.835 181.675   1
  -8  -3  10 4465.00 516.073   1
  -8  -3  11-698.013 249.827   1
  -8  -3  12 3887.65 484.205   1
  -8  -3  13-431.547 211.685   1
  -8  -3  14 1872.88 381.268   1
  -8  -2  -9 275.020 185.398   2
  -8  -2  -8 4769.80 596.062   2
  -8  -2  -7 2565.33 455.267   2
  -8  -2  -6 10247.7 829.547   2
  -8  -2  -5 14347.5 954.865   2
  -8  -2  -4 1377.31 362.007   2
  -8  -2  -3 8513.44 728.941   2
  -8  -2  -2 112.395 200.680   2
  -8  -2  -1 9656.13 761.793   2
  -8  -2   0 473.371 247.460   2
  -8  -2   1 11423.1 820.964   2
  -8  -2   2 3129.96 439.894   2
  -8  -2   3 5572.28 561.687   2
  -8  -2   4 6233.86 578.010   2
  -8  -2   5 1117.66 286.499   2
  -8  -2   6 12931.7 811.504   1
  -8  -2   6 11970.6 835.270   2
  -8  -2   6 11047.0 545.844   3
  -8  -2   7-433.674 238.347   1
  -8  -2   7 186.388 178.771   2
  -8  -2   8 9212.62 685.313   1
  -8  -2   9-312.442 209.016   1
  -8  -2  10 6967.13 604.083   1
  -8  -2  11 227.235 193.750   1
  -8  -2  12 5650.12 564.071   1
  -8  -2  13 4668.89 533.523   1
  -8  -2  14 2194.64 377.215   1
  -8  -2  15 2236.00 381.288   1
  -8  -1 -10 3274.91 483.084   2
  -8  -1  -9 2410.19 416.117   2
  -8  -1  -8 4654.43 548.149   2
  -8  -1  -7 7033.29 668.672   2
  -8  -1  -6 5446.82 592.265   2
  -8  -1  -5 6317.23 634.135   2
  -8  -1  -4 2445.55 402.496   2
  -8  -1  -3 15198.5 944.597   2
  -8  -1  -2-75.6767 219.525   2
  -8  -1  -1 8741.10 699.847   2
  -8  -1   0 5440.43 559.802   2
  -8  -1   1 11400.6 795.679   2
  -8  -1   2 7880.64 651.574   2
  -8  -1   3 2261.24 343.401   2
  -8  -1   4 7563.34 628.238   2
  -8  -1   5 6.44412 188.295   2
  -8  -1   5 120.824 106.053   3
  -8  -1   6 17322.0 892.089   1
  -8  -1   6 15231.1 642.039   3
  -8  -1   6 16249.3 934.636   2
  -8  -1   7-61.1750 161.236   1
  -8  -1   7-19.8322 86.9715   3
  -8  -1   7-420.443 253.418   2
  -8  -1   8 10990.9 715.993   1
  -8  -1   9 179.878 167.889   1
  -8  -1  10 9733.23 686.934   1
  -8  -1  11 4283.91 460.902   1
  -8  -1  12 3552.96 454.549   1
  -8  -1  13 5201.82 530.322   1
  -8  -1  14 655.428 256.120   1
  -8  -1  15 2420.76 375.722   1
  -8   0 -11 2784.00 439.227   2
  -8   0 -10 2305.11 406.469   2
  -8   0  -9 5990.83 842.662   2
  -8   0  -8 1624.44 335.892   2
  -8   0  -7 4234.91 511.255   2
  -8   0  -6 967.758 301.829   2
  -8   0  -5 5593.03 569.807   2
  -8   0  -4-48.8882 166.587   2
  -8   0  -3 12277.3 820.113   2
  -8   0  -2 2328.59 378.782   2
  -8   0  -1 8755.54 679.141   2
  -8   0   0 6552.87 585.229   2
  -8   0   1 7939.62 627.905   2
  -8   0   2 8674.24 661.320   2
  -8   0   3 2052.45 298.077   2
  -8   0   4 13278.5 808.540   2
  -8   0   4 12214.9 597.455   3
  -8   0   5 1940.02 235.036   3
  -8   0   5 2314.84 375.640   2
  -8   0   5 1778.94 268.167   1
  -8   0   6 28347.6 1106.36   1
  -8   0   6 28986.8 1218.62   2
  -8   0   6 26264.5 865.154   3
  -8   0   7 1390.33 186.925   3
  -8   0   7 1639.35 273.523   1
  -8   0   8 2187.85 321.364   1
  -8   0   9 1034.86 252.493   1
  -8   0  10 3041.59 394.746   1
  -8   0  11 8188.23 626.055   1
  -8   0  12 792.069 238.627   1
  -8   0  13 6855.30 581.086   1
  -8   0  14-262.352 166.926   1
  -8   0  15 5548.92 544.801   1
  -8   0  16-72.3746 157.344   1
  -8   1 -11 5037.01 574.068   2
  -8   1 -10 250.698 226.451   2
  -8   1  -9 6659.91 620.662   2
  -8   1  -8 155.589 170.936   2
  -8   1  -7 5344.93 565.876   2
  -8   1  -6 453.812 235.616   2
  -8   1  -5 8496.72 662.520   2
  -8   1  -4 2975.11 401.986   2
  -8   1  -3 8539.39 659.661   2
  -8   1  -2 4480.42 485.768   2
  -8   1  -1 7904.01 617.195   2
  -8   1   0 10886.3 724.403   2
  -8   1   1 743.163 200.403   2
  -8   1   2 7018.37 571.631   2
  -8   1   2 6447.45 448.643   3
  -8   1   3 582.436 182.160   2
  -8   1   3 394.332 130.565   3
  -8   1   4 16189.0 788.005   1
  -8   1   4 18499.9 932.013   2
  -8   1   4 16195.7 693.844   3
  -8   1   5 679.404 160.091   1
  -8   1   5 723.040 155.329   3
  -8   1   5 629.135 209.454   2
  -8   1   6 6944.60 520.963   1
  -8   1   6 7304.41 591.819   2
  -8   1   6 7295.67 442.088   3
  -8   1   7 6042.82 396.910   3
  -8   1   7 7136.74 531.452   1
  -8   1   8 7612.06 558.200   1
  -8   1   8 7046.45 426.993   3
  -8   1   9 13594.9 757.421   1
  -8   1  10 813.863 237.496   1
  -8   1  11 12884.3 760.860   1
  -8   1  12 601.298 213.514   1
  -8   1  13 8767.03 646.397   1
  -8   1  14 368.663 188.912   1
  -8   1  15 3646.59 441.526   1
  -8   1  16 1176.97 292.976   1
  -8   1  17 2909.85 419.816   1
  -8   2 -12-63.0465 202.846   2
  -8   2 -11 8093.19 678.042   2
  -8   2 -10 644.404 249.657   2
  -8   2  -9 10273.9 756.111   2
  -8   2  -8 215.362 225.666   2
  -8   2  -7-14.1051 183.458   2
  -8   2  -6 3255.73 409.447   2
  -8   2  -5 8396.88 637.093   2
  -8   2  -4 8538.85 634.311   2
  -8   2  -3 3805.87 432.931   2
  -8   2  -2 5872.89 507.123   2
  -8   2  -1 689.372 204.905   2
  -8   2   0 7625.71 580.590   2
  -8   2   1-6.53753 136.996   2
  -8   2   1-138.202 143.524   3
  -8   2   2 10712.6 692.071   2
  -8   2   2 10475.5 578.916   3
  -8   2   3 786.374 195.889   2
  -8   2   3 782.753 164.060   3
  -8   2   4 12882.8 749.921   2
  -8   2   4 11695.5 587.009   3
  -8   2   4 11612.2 644.329   1
  -8   2   5 4423.19 393.731   1
  -8   2   5 4571.40 453.119   2
  -8   2   5 3885.77 333.091   3
  -8   2   6 3998.60 326.865   3
  -8   2   6 4649.83 416.877   1
  -8   2   7 14927.2 646.109   3
  -8   2   7 16390.0 790.296   1
  -8   2   8 4111.22 325.828   3
  -8   2   8 4553.30 429.511   1
  -8   2   9 11441.3 559.891   3
  -8   2   9 12835.4 717.056   1
  -8   2  10 234.458 182.291   1
  -8   2  11 12269.5 723.486   1
  -8   2  12 818.175 233.877   1
  -8   2  13 11462.2 720.568   1
  -8   2  14 1614.57 295.644   1
  -8   2  15 2514.56 366.379   1
  -8   2  16 7344.02 606.560   1
  -8   2  17 721.265 254.293   1
  -8   3 -13 5699.05 582.627   2
  -8   3 -12 628.695 252.520   2
  -8   3 -11 6846.11 602.402   2
  -8   3 -10 985.047 271.691   2
  -8   3  -9 2861.06 390.210   2
  -8   3  -8 2693.54 378.910   2
  -8   3  -7 6542.83 554.945   2
  -8   3  -6 8643.19 634.638   2
  -8   3  -5 3038.73 374.139   2
  -8   3  -4 12443.4 740.716   2
  -8   3  -3 610.619 215.172   2
  -8   3  -2 5058.43 453.662   2
  -8   3  -1-184.927 193.142   2
  -8   3  -1-64.0542 99.8488   3
  -8   3   0 12260.3 718.841   2
  -8   3   0 12183.2 653.136   3
  -8   3   1 1969.43 294.244   2
  -8   3   1 1977.15 260.801   3
  -8   3   2 12937.7 655.557   3
  -8   3   2 12677.5 641.052   1
  -8   3   2 13712.0 747.300   2
  -8   3   3 1620.38 235.357   1
  -8   3   3 1072.61 189.972   3
  -8   3   3 1549.69 267.901   2
  -8   3   4 9609.36 544.816   3
  -8   3   4 9779.85 640.963   2
  -8   3   4 9118.24 551.022   1
  -8   3   5 10792.7 676.404   2
  -8   3   5 10395.0 556.089   3
  -8   3   5 11781.9 635.518   1
  -8   3   6 3184.26 338.873   1
  -8   3   6 2654.45 266.233   3
  -8   3   7 12532.3 678.537   1
  -8   3   7 11921.8 589.183   3
  -8   3   8 239.618 127.542   3
  -8   3   8 248.421 135.079   1
  -8   3   9 14827.7 656.695   3
  -8   3   9 15459.3 781.190   1
  -8   3  10 1045.83 223.603   1
  -8   3  10 809.913 178.945   3
  -8   3  11 16571.2 835.999   1
  -8   3  12 2722.74 364.114   1
  -8   3  13 8493.53 611.454   1
  -8   3  14 4031.58 442.542   1
  -8   3  15 3665.71 440.662   1
  -8   3  16 10923.6 741.961   1
  -8   3  17 564.461 209.885   1
  -8   4 -13 9281.44 714.430   2
  -8   4 -12 2806.35 418.235   2
  -8   4 -11 5397.31 538.012   2
  -8   4 -10 6601.91 564.518   2
  -8   4  -9 1380.44 297.273   2
  -8   4  -8 8825.09 633.298   2
  -8   4  -7 3367.61 389.597   2
  -8   4  -6 5466.77 491.497   2
  -8   4  -5 423.267 170.753   2
  -8   4  -4 11910.9 686.383   3
  -8   4  -4 11885.2 695.295   2
  -8   4  -3-58.2836 121.101   2
  -8   4  -3 29.7598 134.562   3
  -8   4  -2 7326.30 532.889   3
  -8   4  -2 7121.94 540.063   2
  -8   4  -1 58.0079 142.014   2
  -8   4  -1 371.642 145.108   3
  -8   4   0 5393.60 470.134   2
  -8   4   0 5640.88 448.624   3
  -8   4   1 4567.87 399.190   3
  -8   4   1 4559.49 421.518   2
  -8   4   1 4358.49 357.578   1
  -8   4   2 7696.37 511.707   3
  -8   4   2 6725.51 452.286   1
  -8   4   2 7618.25 551.956   2
  -8   4   3 4488.29 375.552   1
  -8   4   3 4538.93 433.451   2
  -8   4   3 4577.56 385.991   3
  -8   4   4 3214.15 356.632   2
  -8   4   4 2747.59 302.698   1
  -8   4   4 2894.53 294.754   3
  -8   4   5 7568.67 484.300   3
  -8   4   5 8255.15 522.289   1
  -8   4   6 2179.38 279.596   1
  -8   4   6 1764.39 233.450   3
  -8   4   7 11534.9 642.618   1
  -8   4   7 10919.8 584.264   3
  -8   4   8 99.3113 115.292   1
  -8   4   8 457.959 159.563   3
  -8   4   9 9500.29 597.496   1
  -8   4   9 8799.81 519.622   3
  -8   4  10 1704.33 248.877   3
  -8   4  10 1643.35 281.054   1
  -8   4  11 10642.5 586.319   3
  -8   4  11 11986.5 694.951   1
  -8   4  12 4549.49 448.949   1
  -8   4  13 4586.85 459.947   1
  -8   4  14 13194.5 772.068   1
  -8   4  15 1679.53 294.382   1
  -8   4  16 6809.55 581.990   1
  -8   4  17 668.280 219.397   1
  -8   5 -14 189.269 241.353   2
  -8   5 -13 5418.21 519.750   2
  -8   5 -12 5204.00 510.982   2
  -8   5 -11 966.760 261.538   3
  -8   5 -11 1169.76 287.011   2
  -8   5 -10 12431.9 762.111   2
  -8   5 -10 12617.2 784.273   3
  -8   5  -9 249.923 155.929   3
  -8   5  -9 246.268 185.452   2
  -8   5  -8 8099.78 592.763   2
  -8   5  -8 7641.54 593.307   3
  -8   5  -7 850.617 192.444   2
  -8   5  -7 843.774 206.166   3
  -8   5  -6 7640.51 548.655   2
  -8   5  -6 6948.09 550.167   3
  -8   5  -5 1306.07 239.168   2
  -8   5  -5 2146.75 296.190   3
  -8   5  -4 8014.97 566.591   3
  -8   5  -4 7474.17 547.352   2
  -8   5  -3 1792.42 289.430   2
  -8   5  -3 1270.64 236.173   3
  -8   5  -2 3099.97 339.714   3
  -8   5  -2 3031.05 361.282   2
  -8   5  -1 1122.12 231.957   2
  -8   5  -1 1628.88 242.599   3
  -8   5   0 5021.41 446.181   2
  -8   5   0 4569.71 356.265   1
  -8   5   0 4873.11 420.114   3
  -8   5   1 9137.47 570.228   3
  -8   5   1 8894.36 505.630   1
  -8   5   1 8508.13 576.520   2
  -8   5   2 3379.46 335.250   3
  -8   5   2 3460.93 317.482   1
  -8   5   2 3237.15 366.693   2
  -8   5   3 8859.18 596.975   2
  -8   5   3 9678.11 575.405   3
  -8   5   3 9875.14 547.237   1
  -8   5   4 782.318 162.877   1
  -8   5   4 914.326 193.424   3
  -8   5   5 15456.9 719.594   3
  -8   5   5 16264.7 726.151   1
  -8   5   6 216.422 107.221   3
  -8   5   6 242.549 120.861   1
  -8   5   7 1944.85 259.381   1
  -8   5   7 1919.24 258.113   3
  -8   5   8 1636.51 236.671   3
  -8   5   8 1884.70 272.042   1
  -8   5   9 5148.77 416.576   3
  -8   5   9 5134.02 437.816   1
  -8   5  10 4007.25 367.770   3
  -8   5  10 4173.02 400.662   1
  -8   5  11 4639.96 434.580   1
  -8   5  11 4237.04 382.259   3
  -8   5  12 10204.2 618.931   3
  -8   5  12 10842.1 668.273   1
  -8   5  13 1356.81 253.024   1
  -8   5  14 9560.42 651.660   1
  -8   5  15 628.082 226.998   1
  -8   5  16 8263.40 633.747   1
  -8   5  17 966.066 280.636   1
  -8   6 -13 2617.16 381.396   2
  -8   6 -12 5405.60 510.863   2
  -8   6 -11 697.759 226.401   2
  -8   6 -11 312.322 169.406   3
  -8   6 -10 12848.6 759.914   2
  -8   6 -10 13099.0 798.895   3
  -8   6  -9 752.147 222.176   3
  -8   6  -9 943.654 239.843   2
  -8   6  -8 7393.43 553.463   2
  -8   6  -8 8009.92 610.473   3
  -8   6  -7 3102.20 373.969   2
  -8   6  -7 3128.59 384.679   3
  -8   6  -6 8646.74 609.638   3
  -8   6  -6 7735.86 563.207   2
  -8   6  -5 4707.39 430.584   2
  -8   6  -5 5153.78 477.973   3
  -8   6  -4 5406.25 458.844   2
  -8   6  -4 5665.94 484.694   3
  -8   6  -3 2742.17 333.385   2
  -8   6  -3 2614.03 327.805   3
  -8   6  -2 5089.15 363.181   1
  -8   6  -2 6058.92 484.702   2
  -8   6  -2 5160.53 450.878   3
  -8   6  -1 15792.5 651.330   1
  -8   6  -1 16900.2 803.584   2
  -8   6  -1 16972.4 818.963   3
  -8   6   0 124.247 125.356   2
  -8   6   0 211.083 118.653   3
  -8   6   0 194.569 103.063   1
  -8   6   1 2314.88 299.128   3
  -8   6   1 1830.30 225.199   1
  -8   6   1 2167.76 297.542   2
  -8   6   2-2.48789 120.890   3
  -8   6   2-132.732 128.855   1
  -8   6   2 53.8688 152.239   2
  -8   6   3 6365.18 475.036   3
  -8   6   3 6444.11 425.538   1
  -8   6   4 90.0153 109.392   3
  -8   6   4 132.619 96.1955   1
  -8   6   5 6352.52 474.296   3
  -8   6   5 6658.08 444.578   1
  -8   6   6 1484.31 232.583   1
  -8   6   6 1375.58 239.252   3
  -8   6   7 4083.67 365.461   1
  -8   6   7 3644.30 361.274   3
  -8   6   8 5013.79 416.829   3
  -8   6   8 5229.74 419.483   1
  -8   6   9 3740.15 370.535   3
  -8   6   9 3575.77 354.683   1
  -8   6  10 6829.80 492.694   1
  -8   6  10 6343.62 477.503   3
  -8   6  11 1740.47 269.306   1
  -8   6  11 2114.16 309.636   3
  -8   6  12 6875.05 523.862   3
  -8   6  12 6702.78 513.789   1
  -8   6  13 425.761 168.970   1
  -8   6  14 6564.46 530.932   1
  -8   6  15 296.738 178.539   1
  -8   6  16 5546.19 518.052   1
  -8   6  17 1218.03 255.408   1
  -8   7 -11 156.391 179.015   2
  -8   7 -11-42.6246 196.486   3
  -8   7 -10 10219.8 665.675   2
  -8   7 -10 9819.26 698.390   3
  -8   7  -9 1824.02 311.967   2
  -8   7  -9 1423.72 288.897   3
  -8   7  -8 7554.17 550.494   2
  -8   7  -8 8076.85 614.304   3
  -8   7  -7 9390.78 606.785   2
  -8   7  -7 8817.18 635.495   3
  -8   7  -6 6026.14 491.734   2
  -8   7  -6 6683.42 542.248   3
  -8   7  -5 11410.5 670.600   2
  -8   7  -5 11178.4 701.740   3
  -8   7  -4 997.326 206.687   3
  -8   7  -4 932.993 203.305   2
  -8   7  -3 11458.3 694.153   3
  -8   7  -3 11443.7 661.665   2
  -8   7  -2-28.6119 161.928   3
  -8   7  -2 143.423 139.661   2
  -8   7  -1 12483.2 685.485   2
  -8   7  -1 11914.8 696.461   3
  -8   7   0 4646.13 423.391   2
  -8   7   0 4495.05 426.972   3
  -8   7   1 4466.49 424.205   3
  -8   7   1 3898.79 306.583   1
  -8   7   2 2739.34 261.210   1
  -8   7   2 2839.32 331.629   3
  -8   7   3 4381.18 337.451   1
  -8   7   3 4432.22 408.025   3
  -8   7   4 2734.17 334.665   3
  -8   7   4 2828.12 275.639   1
  -8   7   5 3810.94 383.070   3
  -8   7   5 4227.93 349.061   1
  -8   7   6 4410.38 357.749   1
  -8   7   6 4301.27 405.373   3
  -8   7   7 3531.90 368.963   3
  -8   7   7 3778.45 342.701   1
  -8   7   8 3319.26 323.078   1
  -8   7   8 3282.91 357.482   3
  -8   7   9-16.5537 114.177   1
  -8   7   9 217.405 124.612   3
  -8   7  10 6872.86 486.623   1
  -8   7  10 6654.30 514.902   3
  -8   7  11 142.697 129.061   1
  -8   7  11 215.081 166.291   3
  -8   7  12 6710.29 506.654   1
  -8   7  12 6728.59 534.436   3
  -8   7  13 2429.43 342.777   3
  -8   7  13 2841.84 343.548   1
  -8   7  14 5270.23 484.600   1
  -8   7  15 5977.38 500.123   1
  -8   7  16 3221.13 399.733   1
  -8   7  17 4089.05 450.660   1
  -8   7  18 313.089 280.268   6
  -8   8 -10 6056.78 555.106   3
  -8   8  -9 6347.32 560.936   3
  -8   8  -8 3390.94 401.183   3
  -8   8  -8 3429.32 376.964   2
  -8   8  -7 10893.4 718.255   3
  -8   8  -7 12094.9 686.867   2
  -8   8  -6 1239.52 239.227   3
  -8   8  -6 1730.49 288.314   2
  -8   8  -5 6766.57 552.654   3
  -8   8  -5 7074.90 521.894   2
  -8   8  -4-88.6318 158.383   3
  -8   8  -4 182.270 125.252   2
  -8   8  -3 17694.0 814.251   2
  -8   8  -3 16816.8 858.490   3
  -8   8  -2 2022.01 306.812   3
  -8   8  -2 2102.07 297.653   2
  -8   8  -1 24104.1 958.538   2
  -8   8  -1 24705.9 1033.33   3
  -8   8   0 3470.60 387.994   3
  -8   8   1 7825.30 570.122   3
  -8   8   2 3847.04 398.280   3
  -8   8   3 2877.29 349.242   3
  -8   8   4 5318.13 463.586   3
  -8   8   5 1426.37 197.601   1
  -8   8   5 1811.92 291.262   3
  -8   8   6 8216.94 469.600   1
  -8   8   6 9061.39 609.729   3
  -8   8   7-64.6834 98.5640   1
  -8   8   7 257.876 175.282   3
  -8   8   8 7704.75 562.103   3
  -8   8   8 7267.73 471.449   1
  -8   8   9 489.685 151.873   1
  -8   8   9 173.924 117.027   3
  -8   8  10 5720.41 437.099   1
  -8   8  10 5700.83 501.984   3
  -8   8  11 1379.87 245.614   1
  -8   8  11 1109.51 239.948   3
  -8   8  12 566.066 186.279   1
  -8   8  12 442.321 180.114   3
  -8   8  13 294.865 133.094   3
  -8   8  13 422.476 169.137   1
  -8   8  14 4732.67 447.612   1
  -8   8  15 10770.0 683.584   1
  -8   8  16 5151.69 496.249   1
  -8   8  17 3304.52 410.239   1
  -8   9  -9 8081.61 639.680   3
  -8   9  -8 2081.99 319.006   3
  -8   9  -7 13266.8 800.648   3
  -8   9  -6-243.815 210.178   3
  -8   9  -5 15275.3 748.572   2
  -8   9  -5 14687.9 822.607   3
  -8   9  -4 831.953 218.596   3
  -8   9  -4 788.756 210.258   2
  -8   9  -3 12851.0 766.101   3
  -8   9  -3 12728.0 681.256   2
  -8   9  -2 5077.20 487.721   3
  -8   9  -1 11942.2 726.399   3
  -8   9   0 2975.74 375.587   3
  -8   9   1 2405.06 335.348   3
  -8   9   2 6276.04 518.620   3
  -8   9   3 344.314 184.511   3
  -8   9   4 11080.9 693.556   3
  -8   9   5 91.7820 142.271   3
  -8   9   6 7894.02 579.666   3
  -8   9   7 1012.65 227.101   3
  -8   9   8 6340.22 530.648   3
  -8   9   9 896.389 221.963   3
  -8   9  10 2158.14 343.356   3
  -8   9  11 1046.54 241.593   3
  -8   9  11 1280.69 225.142   1
  -8   9  12 836.943 220.038   3
  -8   9  12 553.720 178.942   1
  -8   9  13 2506.01 380.497   3
  -8   9  13 2480.65 317.806   1
  -8   9  14 2528.18 386.750   3
  -8   9  14 2212.41 324.999   1
  -8   9  15 4926.34 470.257   1
  -8   9  16 2.76103 174.628   1
  -8  10  -8 1235.85 272.571   3
  -8  10  -7 14755.5 864.007   3
  -8  10  -6 188.267 161.818   3
  -8  10  -5 8133.37 634.881   3
  -8  10  -4 4275.86 465.440   3
  -8  10  -3 6184.89 542.887   3
  -8  10  -2 9029.06 653.059   3
  -8  10  -1 4824.92 487.632   3
  -8  10   0 13620.1 796.613   3
  -8  10   1 4239.58 455.297   3
  -8  10   2 5895.73 534.807   3
  -8  10   3 1398.14 264.894   3
  -8  10   4 9937.01 683.338   3
  -8  10   5 1048.74 246.173   3
  -8  10   6 7754.42 609.234   3
  -8  10   7 785.257 242.766   3
  -8  10   8 5704.15 549.147   3
  -8  10   9 5105.77 505.637   3
  -8  10  10 176.227 157.666   3
  -8  10  11 2385.02 377.870   3
  -8  10  12 399.696 194.518   3
  -8  10  13 2320.09 359.675   3
  -8  10  14 241.955 212.235   3
  -8  11  -6 1629.65 312.760   3
  -8  11  -5 4566.39 496.187   3
  -8  11  -4 6282.60 569.360   3
  -8  11  -3 4226.81 483.228   3
  -8  11  -2 11400.2 750.673   3
  -8  11  -1 973.343 239.215   3
  -8  11   0 9464.96 681.764   3
  -8  11   1 80.6183 134.793   3
  -8  11   2 12515.5 782.658   3
  -8  11   3 4210.08 468.393   3
  -8  11   4 6203.16 579.332   3
  -8  11   5 2548.22 381.464   3
  -8  11   6 2171.52 347.655   3
  -8  11   7 2620.66 377.662   3
  -8  11   8 732.731 269.381   3
  -8  11   9 8011.62 664.704   3
  -8  11  10 368.102 200.661   3
  -8  11  11 3237.09 440.175   3
  -8  11  12-58.9692 152.262   3
  -8  11  13 2548.01 422.664   3
  -8  11  14 350.555 256.702   3
  -8  12  -4 5196.34 540.296   3
  -8  12  -3 472.696 227.307   3
  -8  12  -2 14091.7 859.274   3
  -8  12  -1-111.698 158.609   3
  -8  12   0 13799.7 850.564   3
  -8  12   1 2260.70 365.686   3
  -8  12   2 10151.2 734.869   3
  -8  12   3 3991.37 456.211   3
  -8  12   4 5569.27 550.884   3
  -8  12   5 5717.49 564.357   3
  -8  12   6 313.981 247.734   3
  -8  12   7 6919.13 632.221   3
  -8  12   8 57.9751 189.298   3
  -8  12   9 8223.22 695.298   3
  -8  12  10 434.134 254.120   3
  -8  12  11 4918.68 551.691   3
  -8  13   1 3651.53 462.130   3
  -8  13   2 5573.26 564.378   3
  -8  13   3 5045.75 549.801   3
  -8  13   4 2988.00 431.140   3
  -8  13   5 7282.15 664.481   3
  -7  -9  -3 6093.74 610.291   2
  -7  -9  -2 364.086 204.958   2
  -7  -9  -1 4462.66 504.965   2
  -7  -9   0 1788.08 344.643   2
  -7  -9   1 415.784 245.332   2
  -7  -9   2 2160.16 357.430   2
  -7  -9   3 246.816 174.603   2
  -7  -9   4 2214.59 385.092   2
  -7  -9   5-20.4776 180.765   2
  -7  -8  -5 3807.03 494.764   2
  -7  -8  -4 2676.99 419.494   2
  -7  -8  -3 6140.35 604.736   2
  -7  -8  -2 1818.33 318.549   2
  -7  -8  -1 3153.38 438.745   2
  -7  -8   0 3464.77 476.415   2
  -7  -8   1 159.757 236.090   2
  -7  -8   2 6304.27 597.818   2
  -7  -8   3 15.0023 167.036   2
  -7  -8   4 6643.46 605.571   2
  -7  -8   5 1096.69 315.818   2
  -7  -8   6 1775.83 347.461   2
  -7  -8   8 1650.55 359.459   1
  -7  -8   9 2132.65 388.627   1
  -7  -8  10 1358.45 330.176   1
  -7  -7  -6 778.934 284.139   2
  -7  -7  -5 4260.72 502.744   2
  -7  -7  -4 6138.83 596.640   2
  -7  -7  -3 7124.03 640.492   2
  -7  -7  -2 4163.31 491.511   2
  -7  -7  -1 206.706 210.993   2
  -7  -7   0 8077.95 663.234   2
  -7  -7   1 426.669 229.287   2
  -7  -7   2 10472.9 750.305   2
  -7  -7   3 208.370 192.431   2
  -7  -7   4 5104.80 519.904   2
  -7  -7   5 2226.14 365.632   2
  -7  -7   6 1349.15 287.968   2
  -7  -7   7 3193.33 450.957   2
  -7  -7   8 711.509 245.465   1
  -7  -7   9 5999.83 646.814   1
  -7  -7  10 12.0579 158.573   1
  -7  -7  11 3126.45 482.859   1
  -7  -7  12 102.682 207.353   1
  -7  -6  -8 1122.66 296.695   2
  -7  -6  -7 6092.61 608.511   2
  -7  -6  -6 3271.95 445.934   2
  -7  -6  -5 8258.53 680.238   2
  -7  -6  -4 6286.33 601.583   2
  -7  -6  -3 569.259 262.231   2
  -7  -6  -2 14644.8 890.473   2
  -7  -6  -1 908.985 295.989   2
  -7  -6   0 12818.4 837.976   2
  -7  -6   1 791.867 248.346   2
  -7  -6   2 6236.31 579.732   2
  -7  -6   3 1477.01 317.110   2
  -7  -6   4 3655.75 452.884   2
  -7  -6   5 4860.82 504.937   2
  -7  -6   6 1067.94 290.121   2
  -7  -6   7 10747.5 767.934   2
  -7  -6   8-353.643 279.677   1
  -7  -6   9 7952.09 704.599   1
  -7  -6  10-481.885 230.470   1
  -7  -6  11 6150.56 619.966   1
  -7  -6  12 447.715 231.682   1
  -7  -6  13 2052.24 369.977   1
  -7  -6  14 1189.98 299.057   1
  -7  -5  -9 4854.08 556.216   2
  -7  -5  -8 2637.58 398.834   2
  -7  -5  -7 5402.20 573.639   2
  -7  -5  -6 5559.63 589.567   2
  -7  -5  -5 2631.94 413.549   2
  -7  -5  -4 7146.60 633.030   2
  -7  -5  -3 94.1625 174.706   2
  -7  -5  -2 11821.8 809.786   2
  -7  -5  -1-9.29923 169.166   2
  -7  -5   0 8902.44 700.215   2
  -7  -5   1 2178.88 368.210   2
  -7  -5   2 7799.73 659.037   2
  -7  -5   3 5994.83 569.730   2
  -7  -5   4 5321.36 529.784   2
  -7  -5   5 4789.20 507.596   2
  -7  -5   6-141.180 202.517   2
  -7  -5   7 10833.5 758.655   2
  -7  -5   8 17.8554 213.298   1
  -7  -5   9 8198.96 684.210   1
  -7  -5  10 2279.13 371.878   1
  -7  -5  11 3744.29 473.606   1
  -7  -5  12 1892.54 352.900   1
  -7  -5  13 2522.32 408.534   1
  -7  -5  14 2104.87 384.225   1
  -7  -5  15-191.872 174.462   1
  -7  -4 -10 2394.96 405.533   2
  -7  -4  -9 2215.09 379.602   2
  -7  -4  -8 6093.95 609.623   2
  -7  -4  -7 2141.56 382.594   2
  -7  -4  -6 4853.09 557.807   2
  -7  -4  -5 518.288 222.260   2
  -7  -4  -4 11378.3 799.649   2
  -7  -4  -3 43.7941 167.663   2
  -7  -4  -2 9026.71 689.214   2
  -7  -4  -1 3099.11 423.395   2
  -7  -4   0 8148.40 673.787   2
  -7  -4   1 10835.4 760.554   2
  -7  -4   2 2062.67 340.238   2
  -7  -4   3 5103.50 516.231   2
  -7  -4   4 1005.11 217.524   2
  -7  -4   5 9623.24 702.575   2
  -7  -4   6 107.911 176.571   2
  -7  -4   7 10568.3 742.430   2
  -7  -4   7 10463.4 726.599   1
  -7  -4   8 2771.74 393.298   1
  -7  -4   9 4167.26 470.656   1
  -7  -4  10 6394.83 591.837   1
  -7  -4  11 7236.87 622.764   1
  -7  -4  12 4541.21 492.747   1
  -7  -4  13-54.5049 146.638   1
  -7  -4  14 4746.37 532.584   1
  -7  -4  15 66.6953 157.948   1
  -7  -4  16 5705.76 573.481   1
  -7  -3 -11 1225.26 340.641   2
  -7  -3 -10 2276.98 395.564   2
  -7  -3  -9-159.617 246.132   2
  -7  -3  -8 10292.1 777.972   2
  -7  -3  -7 722.469 282.968   2
  -7  -3  -6 13752.7 884.227   2
  -7  -3  -5 4039.08 479.814   2
  -7  -3  -4 1057.09 234.859   2
  -7  -3  -3-98.4158 195.432   2
  -7  -3  -2 6967.62 625.377   2
  -7  -3  -1 5739.75 547.718   2
  -7  -3   0 4145.28 463.333   2
  -7  -3   1 14542.7 857.956   2
  -7  -3   2 3164.09 398.198   2
  -7  -3   3 12974.7 803.552   2
  -7  -3   4-449.569 226.691   2
  -7  -3   5 13933.9 834.998   2
  -7  -3   6 674.149 235.007   2
  -7  -3   7 5289.64 503.313   2
  -7  -3   7 5128.58 490.141   1
  -7  -3   8 6388.45 540.197   1
  -7  -3   9 3888.98 435.773   1
  -7  -3  10 7798.38 613.024   1
  -7  -3  11 858.745 260.212   1
  -7  -3  12 12061.2 778.430   1
  -7  -3  13 534.494 189.752   1
  -7  -3  14 9093.74 697.046   1
  -7  -3  15 1261.36 295.714   1
  -7  -3  16 7571.65 650.409   1
  -7  -3  17 2642.29 427.381   1
  -7  -2 -12 6398.12 668.136   2
  -7  -2 -11-148.731 200.110   2
  -7  -2 -10 5067.97 563.027   2
  -7  -2  -9 1377.19 333.199   2
  -7  -2  -8 6860.14 631.467   2
  -7  -2  -7 4398.48 516.366   2
  -7  -2  -6 4592.90 512.417   2
  -7  -2  -5 4764.71 507.993   2
  -7  -2  -4 4237.59 466.790   2
  -7  -2  -3 1629.09 292.550   2
  -7  -2  -2 1662.48 326.219   2
  -7  -2  -1 12130.2 777.287   2
  -7  -2   0 3065.32 411.624   2
  -7  -2   1 14255.6 827.205   2
  -7  -2   2 18.4577 184.660   2
  -7  -2   3 17161.0 898.022   2
  -7  -2   4 885.320 226.928   2
  -7  -2   5 9670.49 663.580   2
  -7  -2   6 4194.55 441.541   2
  -7  -2   7 6822.03 535.186   1
  -7  -2   7 6852.79 565.988   2
  -7  -2   7 6767.63 366.162   3
  -7  -2   8 16353.3 836.887   1
  -7  -2   8 15230.1 539.770   3
  -7  -2   9 1120.29 226.130   1
  -7  -2  10 18798.0 914.644   1
  -7  -2  11 1078.80 246.778   1
  -7  -2  12 15649.6 847.571   1
  -7  -2  13 749.216 228.594   1
  -7  -2  14 4548.66 479.915   1
  -7  -2  15 1945.81 344.293   1
  -7  -2  16 5940.53 560.311   1
  -7  -2  17 6473.79 593.620   1
  -7  -2  18 1882.20 362.344   1
  -7  -1 -13-26.5112 184.393   2
  -7  -1 -12 4913.81 914.128   2
  -7  -1 -11 1217.84 305.714   2
  -7  -1 -10 6810.15 633.884   2
  -7  -1  -9 2004.29 354.760   2
  -7  -1  -8 6195.16 595.083   2
  -7  -1  -7 7590.17 648.291   2
  -7  -1  -6 7661.30 630.830   2
  -7  -1  -5 7908.86 632.535   2
  -7  -1  -4 2194.13 340.927   2
  -7  -1  -3 10952.8 729.541   2
  -7  -1  -2 1219.89 263.134   2
  -7  -1  -1 12553.1 761.429   2
  -7  -1   0 134.733 176.770   2
  -7  -1   1 12937.7 761.238   2
  -7  -1   2 1490.82 285.395   2
  -7  -1   3 6429.64 521.698   2
  -7  -1   4 10363.5 676.725   2
  -7  -1   5 10118.2 661.813   2
  -7  -1   6 10661.5 680.068   2
  -7  -1   6 10678.9 640.133   1
  -7  -1   6 9530.68 453.779   3
  -7  -1   7 5971.85 476.225   1
  -7  -1   7 5703.92 499.493   2
  -7  -1   7 5555.77 335.455   3
  -7  -1   8 4686.86 433.361   1
  -7  -1   8 4224.24 283.683   3
  -7  -1   9 7350.36 544.203   1
  -7  -1  10 26892.0 1060.57   1
  -7  -1  11 3117.79 382.764   1
  -7  -1  12 12525.9 743.483   1
  -7  -1  13 3237.76 395.622   1
  -7  -1  14 7865.06 609.805   1
  -7  -1  15 7566.76 621.519   1
  -7  -1  16 2742.31 385.062   1
  -7  -1  17 5908.12 566.431   1
  -7  -1  18 191.140 146.947   1
  -7   0 -14 9639.65 782.120   2
  -7   0 -13 1621.44 323.961   2
  -7   0 -12 8981.20 735.855   2
  -7   0 -11 4602.09 523.362   2
  -7   0 -10 2574.11 398.498   2
  -7   0  -9 5788.08 561.504   2
  -7   0  -8 1480.95 291.191   2
  -7   0  -7 5458.89 525.671   2
  -7   0  -6 406.599 218.867   2
  -7   0  -5 10471.8 699.266   2
  -7   0  -4 110.479 169.244   2
  -7   0  -3 14305.8 799.697   2
  -7   0  -2 98.3923 129.766   2
  -7   0  -1 8206.73 586.759   2
  -7   0   0 5121.49 465.957   2
  -7   0   1 8249.53 581.855   2
  -7   0   2 2703.11 328.392   2
  -7   0   3 7370.55 544.927   2
  -7   0   4 6788.29 528.445   2
  -7   0   5 1889.58 291.607   2
  -7   0   5 1743.92 199.422   3
  -7   0   6 10686.8 485.748   3
  -7   0   6 11200.9 626.892   1
  -7   0   6 11676.1 689.254   2
  -7   0   7 6076.44 351.621   3
  -7   0   7 6541.07 478.541   1
  -7   0   8 8154.75 549.671   1
  -7   0   8 7687.54 393.319   3
  -7   0   9 243.667 85.4097   3
  -7   0   9 491.108 190.846   1
  -7   0  10 10301.9 632.384   1
  -7   0  11 4152.78 422.339   1
  -7   0  12 5752.69 489.180   1
  -7   0  13 6114.72 507.939   1
  -7   0  14 4840.42 467.285   1
  -7   0  15 11088.6 718.655   1
  -7   0  16 1060.60 245.929   1
  -7   0  17 7997.24 628.233   1
  -7   0  18 462.267 164.329   1
  -7   0  19 12371.7 817.786   1
  -7   1 -15 392.075 193.504   2
  -7   1 -14 5640.45 585.207   2
  -7   1 -13 3483.51 442.512   2
  -7   1 -12 5357.39 573.502   2
  -7   1 -11 13814.6 876.738   2
  -7   1 -10 4284.82 470.046   2
  -7   1  -9 5226.46 507.617   2
  -7   1  -8 40.5409 143.110   2
  -7   1  -7 8082.88 615.698   2
  -7   1  -6 2494.49 348.411   2
  -7   1  -5 18443.7 898.369   2
  -7   1  -4 5401.63 485.451   2
  -7   1  -3 15368.2 791.740   2
  -7   1  -2 5861.98 485.312   2
  -7   1  -1 6081.06 490.600   2
  -7   1   0 1622.55 268.523   2
  -7   1   1 6624.79 507.703   2
  -7   1   2 6313.58 487.706   2
  -7   1   3 961.806 203.537   2
  -7   1   3 1245.41 186.844   3
  -7   1   4 12494.1 556.047   3
  -7   1   4 13956.0 730.775   2
  -7   1   5 626.464 132.112   3
  -7   1   5 638.277 165.400   1
  -7   1   5 688.522 176.740   2
  -7   1   6 19821.2 679.602   3
  -7   1   6 21211.4 840.147   1
  -7   1   6 21230.6 911.418   2
  -7   1   7 1002.77 209.278   1
  -7   1   7 708.518 128.794   3
  -7   1   8 4890.09 413.051   1
  -7   1   8 4023.51 287.361   3
  -7   1   9 2736.46 233.264   3
  -7   1   9 3064.97 343.202   1
  -7   1  10 4873.44 311.709   3
  -7   1  10 5818.15 466.331   1
  -7   1  11 10845.0 649.429   1
  -7   1  12 5017.89 447.236   1
  -7   1  13 8130.79 579.287   1
  -7   1  14 1405.14 276.557   1
  -7   1  15 7957.16 594.869   1
  -7   1  16 102.191 159.624   1
  -7   1  17 9212.43 663.015   1
  -7   1  18 480.907 206.805   1
  -7   1  19 6815.88 603.434   1
  -7   2 -15 3956.86 483.089   2
  -7   2 -14 4066.44 490.272   2
  -7   2 -13 4511.89 512.156   2
  -7   2 -12 2355.22 348.637   2
  -7   2 -11 12330.2 791.787   2
  -7   2 -10 291.314 203.649   2
  -7   2  -9 11950.6 740.094   2
  -7   2  -8 154.605 184.341   2
  -7   2  -7 16974.0 858.704   2
  -7   2  -6 11070.9 675.028   2
  -7   2  -5 11083.8 667.817   2
  -7   2  -4 8679.49 578.039   2
  -7   2  -3 5466.92 457.802   2
  -7   2  -2 16073.7 767.796   2
  -7   2  -1 399.540 167.515   2
  -7   2   0 7336.19 508.240   2
  -7   2   1 67.7457 165.644   2
  -7   2   2 8211.89 538.245   2
  -7   2   2 8428.94 475.444   3
  -7   2   3 189.897 133.883   2
  -7   2   3-57.3972 92.0825   3
  -7   2   4 14605.2 728.364   2
  -7   2   4 14596.4 660.305   1
  -7   2   4 14228.4 603.165   3
  -7   2   5 291.457 98.1558   3
  -7   2   5 418.887 136.873   1
  -7   2   5 565.271 159.751   2
  -7   2   6 6425.65 386.530   3
  -7   2   6 6787.98 456.718   1
  -7   2   7 4549.11 318.644   3
  -7   2   7 5300.99 412.025   1
  -7   2   8 6261.17 459.102   1
  -7   2   8 5629.52 355.029   3
  -7   2   9 4956.26 417.929   1
  -7   2   9 4276.36 310.655   3
  -7   2  10 2702.23 318.544   1
  -7   2  10 2553.71 238.916   3
  -7   2  11 6847.93 395.982   3
  -7   2  11 8010.08 549.377   1
  -7   2  12 2648.19 318.461   1
  -7   2  13 6115.66 498.176   1
  -7   2  14 178.372 145.226   1
  -7   2  15 10018.0 662.930   1
  -7   2  16 2304.75 337.667   1
  -7   2  17 6428.15 561.439   1
  -7   2  19 4381.45 491.785   1
  -7   3 -16 3897.84 503.099   2
  -7   3 -15 4933.11 525.285   2
  -7   3 -14 2338.51 378.119   2
  -7   3 -13 14381.9 859.450   2
  -7   3 -12 192.912 203.867   2
  -7   3 -11 20108.6 969.443   2
  -7   3 -10 1519.37 278.684   2
  -7   3  -9 16014.2 830.182   2
  -7   3  -8 242.559 161.073   2
  -7   3  -7 6330.76 509.795   2
  -7   3  -6 25355.1 997.235   2
  -7   3  -5 5275.40 444.342   2
  -7   3  -4 21784.2 890.225   2
  -7   3  -3 1568.94 244.705   2
  -7   3  -2 15527.0 732.036   2
  -7   3  -1-11.8639 124.183   2
  -7   3   0 23701.3 852.771   3
  -7   3   0 24146.0 918.512   2
  -7   3   1 1151.88 184.627   3
  -7   3   1 1132.44 210.689   2
  -7   3   2 15275.0 657.198   3
  -7   3   2 15809.1 735.426   2
  -7   3   3 2610.42 294.835   2
  -7   3   3 2722.50 274.627   3
  -7   3   3 2618.38 272.176   1
  -7   3   4 9230.67 507.773   1
  -7   3   4 9214.20 567.024   2
  -7   3   4 8658.85 473.482   3
  -7   3   5 8380.72 539.449   2
  -7   3   5 8524.54 463.923   3
  -7   3   5 8895.00 506.629   1
  -7   3   6 5277.34 395.603   1
  -7   3   6 5092.40 356.448   3
  -7   3   7 11532.4 598.771   1
  -7   3   7 10621.6 516.574   3
  -7   3   8 1987.03 225.004   3
  -7   3   8 2471.85 297.550   1
  -7   3   9 8655.32 539.013   1
  -7   3   9 8258.70 448.825   3
  -7   3  10 657.203 140.037   3
  -7   3  10 802.426 175.995   1
  -7   3  11 6374.16 403.935   3
  -7   3  11 7333.53 514.415   1
  -7   3  12-194.227 140.025   1
  -7   3  12 37.9330 114.684   3
  -7   3  13 14886.7 763.665   1
  -7   3  14 2670.25 346.768   1
  -7   3  15 5584.91 492.499   1
  -7   3  16 4256.67 438.402   1
  -7   3  17 3756.25 436.221   1
  -7   3  18 5677.89 532.069   1
  -7   3  19 2158.67 365.971   1
  -7   4 -16 130.012 244.810   2
  -7   4 -15 3768.14 436.043   2
  -7   4 -14 939.453 256.788   2
  -7   4 -13 9106.25 658.793   2
  -7   4 -12 341.674 221.317   2
  -7   4 -11 9335.82 634.961   2
  -7   4 -10 944.928 245.059   2
  -7   4  -9 14694.1 769.323   2
  -7   4  -8 7642.31 539.306   2
  -7   4  -7 11070.3 636.256   2
  -7   4  -6 19029.1 830.148   2
  -7   4  -5 2229.03 281.743   2
  -7   4  -4 20535.0 836.568   2
  -7   4  -3-14.1197 111.717   3
  -7   4  -3 70.6908 115.962   2
  -7   4  -2 16290.4 726.356   3
  -7   4  -2 16166.1 729.184   2
  -7   4  -1 5064.20 390.923   3
  -7   4  -1 4987.68 404.016   2
  -7   4   0 35466.4 1078.73   3
  -7   4   0 34795.4 1100.06   2
  -7   4   1 5112.26 388.108   3
  -7   4   1 4681.83 391.407   2
  -7   4   2 11384.7 540.338   1
  -7   4   2 11387.4 576.445   3
  -7   4   2 11228.5 609.207   2
  -7   4   3 9185.63 549.583   2
  -7   4   3 9703.01 502.889   1
  -7   4   3 9694.25 520.222   3
  -7   4   4 3768.23 349.364   2
  -7   4   4 3683.30 310.763   1
  -7   4   4 3695.45 317.145   3
  -7   4   5 11485.6 558.321   3
  -7   4   5 11986.5 579.982   1
  -7   4   6 106.673 103.802   3
  -7   4   6 432.855 136.982   1
  -7   4   7 5259.33 372.101   3
  -7   4   7 5865.77 419.549   1
  -7   4   8 838.455 160.649   3
  -7   4   8 1160.74 205.125   1
  -7   4   9 12322.5 627.396   1
  -7   4   9 11612.8 558.206   3
  -7   4  10 26.0490 98.9035   1
  -7   4  10 24.4669 88.9319   3
  -7   4  11 6753.47 483.951   1
  -7   4  11 5824.30 409.803   3
  -7   4  12 434.286 139.198   3
  -7   4  12 401.569 160.391   1
  -7   4  13 7714.55 547.124   1
  -7   4  13 6973.01 474.165   3
  -7   4  14 3400.20 381.271   1
  -7   4  15 2921.56 361.104   1
  -7   4  16 3840.80 424.211   1
  -7   4  17 1222.60 279.134   1
  -7   4  18 5756.91 535.941   1
  -7   4  19-82.5839 128.171   1
  -7   5 -16 1173.87 277.210   2
  -7   5 -15 7173.51 592.284   2
  -7   5 -14 801.079 255.157   2
  -7   5 -13 9648.91 646.959   2
  -7   5 -12 2639.21 347.257   2
  -7   5 -11 7512.54 552.956   2
  -7   5 -10 5469.10 458.376   2
  -7   5  -9 7124.23 517.748   2
  -7   5  -8 11529.6 640.274   2
  -7   5  -7 1598.31 250.516   3
  -7   5  -7 1579.03 242.422   2
  -7   5  -6 13849.8 681.635   2
  -7   5  -6 13502.1 701.443   3
  -7   5  -5 270.636 115.624   3
  -7   5  -5 435.689 139.843   2
  -7   5  -4 22093.8 883.244   3
  -7   5  -4 20356.7 823.403   2
  -7   5  -3 4557.48 392.858   3
  -7   5  -3 4888.34 394.895   2
  -7   5  -2 23237.5 869.844   2
  -7   5  -2 24528.5 916.626   3
  -7   5  -1 10946.6 600.446   3
  -7   5  -1 10307.1 571.977   2
  -7   5   0 11335.1 596.811   3
  -7   5   0 10400.5 487.714   1
  -7   5   0 11228.7 596.342   2
  -7   5   1 15716.2 699.338   3
  -7   5   1 14870.2 596.144   1
  -7   5   1 15908.3 719.048   2
  -7   5   2 5652.46 420.343   2
  -7   5   2 6231.44 382.381   1
  -7   5   2 5381.20 396.758   3
  -7   5   3 13949.0 679.543   2
  -7   5   3 15069.2 673.414   3
  -7   5   3 15450.4 622.985   1
  -7   5   4 2230.83 244.202   1
  -7   5   4 2289.94 263.599   3
  -7   5   5 13204.9 594.819   1
  -7   5   5 12234.9 598.207   3
  -7   5   6 1371.31 204.831   3
  -7   5   6 1287.29 201.251   1
  -7   5   7 7483.97 460.795   1
  -7   5   7 7193.45 448.866   3
  -7   5   8 760.849 176.734   1
  -7   5   8 732.133 168.794   3
  -7   5   9 8741.23 520.125   1
  -7   5   9 8010.21 481.295   3
  -7   5  10 2328.86 266.333   3
  -7   5  10 2232.20 274.206   1
  -7   5  11 5687.70 428.067   3
  -7   5  11 5757.79 442.826   1
  -7   5  12 5034.27 422.190   1
  -7   5  12 4926.24 412.435   3
  -7   5  13 1780.28 262.983   3
  -7   5  13 1919.26 277.883   1
  -7   5  14 3805.80 379.823   1
  -7   5  15 876.715 239.600   1
  -7   5  16 5729.91 495.337   1
  -7   5  17-12.9642 154.712   1
  -7   5  18 6099.13 536.726   1
  -7   5  18 5409.79 561.650   6
  -7   5  19 80.7615 142.475   1
  -7   6 -15 7251.47 573.845   2
  -7   6 -14 470.236 209.752   3
  -7   6 -14 493.076 189.847   2
  -7   6 -13 5960.55 538.730   3
  -7   6 -13 5716.12 489.483   2
  -7   6 -12 4815.04 488.587   3
  -7   6 -12 4838.67 438.144   2
  -7   6 -11 3253.36 359.275   2
  -7   6 -11 3393.80 390.772   3
  -7   6 -10 8503.77 557.921   2
  -7   6 -10 9085.00 625.355   3
  -7   6  -9 983.064 215.592   2
  -7   6  -9 825.330 197.587   3
  -7   6  -8 15815.1 736.482   2
  -7   6  -8 15937.7 798.900   3
  -7   6  -7-2.38492 112.141   2
  -7   6  -7-9.68193 121.382   3
  -7   6  -6 16898.2 745.385   2
  -7   6  -6 17352.9 812.864   3
  -7   6  -5 730.732 178.746   3
  -7   6  -5 1004.84 194.457   2
  -7   6  -4 11425.7 633.693   3
  -7   6  -4 11631.9 609.264   2
  -7   6  -3 2179.54 271.579   2
  -7   6  -3 2036.47 269.083   3
  -7   6  -2 15287.7 726.136   3
  -7   6  -2 15137.0 696.080   2
  -7   6  -1 11500.1 602.411   2
  -7   6  -1 10612.9 470.712   1
  -7   6  -1 10976.6 609.900   3
  -7   6   0 2973.14 311.179   3
  -7   6   0 3231.07 321.130   2
  -7   6   0 2787.20 234.207   1
  -7   6   1 19617.5 794.824   2
  -7   6   1 18984.8 788.504   3
  -7   6   1 19452.4 658.468   1
  -7   6   2 4392.61 382.208   2
  -7   6   2 4558.47 320.445   1
  -7   6   2 5244.71 406.655   3
  -7   6   3 30400.0 868.601   1
  -7   6   3 30852.0 1009.83   3
  -7   6   4 1008.02 160.963   1
  -7   6   4 1131.62 208.075   3
  -7   6   5 16201.7 708.146   3
  -7   6   5 17523.7 664.501   1
  -7   6   6 2320.25 283.358   3
  -7   6   6 2287.54 250.265   1
  -7   6   7 6231.86 408.072   1
  -7   6   7 5631.66 419.757   3
  -7   6   8 10045.1 564.699   3
  -7   6   8 10324.2 541.635   1
  -7   6   9 6235.89 429.251   1
  -7   6   9 6188.37 446.193   3
  -7   6  10 7272.65 474.433   1
  -7   6  10 8232.77 523.262   3
  -7   6  11 2243.03 281.575   1
  -7   6  11 2571.72 315.662   3
  -7   6  12 3883.53 364.492   1
  -7   6  12 3946.38 387.673   3
  -7   6  13-179.993 124.792   1
  -7   6  13 16.6871 111.482   3
  -7   6  14 2519.11 318.392   1
  -7   6  14 2204.86 298.252   3
  -7   6  15 76.1041 135.608   1
  -7   6  16 2725.78 356.094   1
  -7   6  17 17.2330 152.660   1
  -7   6  18 2332.36 421.243   6
  -7   6  18 2852.45 369.036   1
  -7   6  19 966.751 280.049   6
  -7   6  19 593.255 225.643   1
  -7   7 -14 2057.61 333.190   3
  -7   7 -13 2618.60 361.882   3
  -7   7 -12 4671.40 476.711   3
  -7   7 -12 4973.73 425.923   2
  -7   7 -11 82.0935 141.011   3
  -7   7 -11 383.567 170.033   2
  -7   7 -10 4921.38 455.204   3
  -7   7 -10 5395.54 437.999   2
  -7   7  -9-66.1482 111.985   2
  -7   7  -9-81.8416 143.645   3
  -7   7  -8 14718.2 698.942   2
  -7   7  -8 14492.4 771.672   3
  -7   7  -7 52.7606 111.322   2
  -7   7  -7-58.7270 146.967   3
  -7   7  -6 10392.6 633.885   3
  -7   7  -6 9567.91 555.956   2
  -7   7  -5 593.898 167.461   2
  -7   7  -5 512.369 175.236   3
  -7   7  -4 24744.1 890.886   2
  -7   7  -4 24936.6 969.269   3
  -7   7  -3 24729.2 961.051   3
  -7   7  -3 23668.5 875.814   2
  -7   7  -2 84.0513 144.300   3
  -7   7  -2 305.520 133.723   2
  -7   7  -2 32.8200 96.5604   1
  -7   7  -1 25302.3 900.239   2
  -7   7  -1 24258.4 935.029   3
  -7   7  -1 23327.2 669.525   1
  -7   7   0 407.227 141.023   2
  -7   7   0 282.008 80.5860   1
  -7   7   0 655.328 180.424   3
  -7   7   1 21461.2 659.385   1
  -7   7   1 21005.2 857.467   3
  -7   7   2 205.298 104.863   3
  -7   7   2 27.9278 79.3545   1
  -7   7   3 21792.7 859.294   3
  -7   7   3 20590.0 668.917   1
  -7   7   4 3965.31 371.726   3
  -7   7   4 3887.87 295.201   1
  -7   7   5 12514.3 648.984   3
  -7   7   5 12935.6 549.416   1
  -7   7   6 7812.69 433.517   1
  -7   7   6 7393.50 493.534   3
  -7   7   7 6017.43 391.077   1
  -7   7   7 6599.75 471.679   3
  -7   7   8 17046.5 770.938   3
  -7   7   8 17650.8 696.057   1
  -7   7   9 2494.25 267.678   1
  -7   7   9 2454.59 295.150   3
  -7   7  10 7172.25 515.971   3
  -7   7  10 7408.94 475.784   1
  -7   7  11-172.877 112.418   1
  -7   7  11-112.602 145.291   3
  -7   7  12 1902.36 286.604   3
  -7   7  12 1755.14 242.471   1
  -7   7  13 5504.74 473.421   3
  -7   7  13 5579.50 443.002   1
  -7   7  14 10432.6 632.548   1
  -7   7  14 11042.2 678.283   3
  -7   7  15 758.568 208.497   1
  -7   7  15 979.138 214.623   3
  -7   7  16 2694.19 347.660   1
  -7   7  17 2634.81 358.380   1
  -7   7  17 2475.63 405.532   6
  -7   7  18 926.853 305.762   6
  -7   7  18 1206.35 279.257   1
  -7   7  19 2169.45 400.421   6
  -7   7  20 841.239 320.450   6
  -7   8 -14 8529.81 664.294   3
  -7   8 -13 899.370 231.061   3
  -7   8 -12 2385.37 344.982   3
  -7   8 -11 7.78001 162.050   3
  -7   8 -10 9866.13 660.996   3
  -7   8 -10 9486.12 559.463   2
  -7   8  -9 887.834 200.616   2
  -7   8  -9 806.733 225.105   3
  -7   8  -8 4284.34 372.855   2
  -7   8  -8 3952.41 407.053   3
  -7   8  -7 4108.83 365.245   2
  -7   8  -7 3805.01 395.585   3
  -7   8  -6 10590.9 579.131   2
  -7   8  -6 11069.9 666.075   3
  -7   8  -5 6288.36 497.011   3
  -7   8  -5 7473.85 478.184   2
  -7   8  -4 5600.97 416.739   2
  -7   8  -4 5674.83 460.601   3
  -7   8  -3 19212.6 859.368   3
  -7   8  -3 19289.0 778.497   2
  -7   8  -2 895.187 188.275   2
  -7   8  -2 1032.00 219.148   3
  -7   8  -1 32118.0 1109.02   3
  -7   8  -1 30292.6 986.032   2
  -7   8   0 733.831 189.243   3
  -7   8   1 19378.6 840.556   3
  -7   8   1 19613.5 580.226   1
  -7   8   2 2220.99 306.284   3
  -7   8   2 1929.03 181.633   1
  -7   8   3 20289.4 633.991   1
  -7   8   3 20946.9 869.395   3
  -7   8   4 10644.1 622.069   3
  -7   8   4 10520.0 462.299   1
  -7   8   5 9354.52 452.451   1
  -7   8   5 9293.65 577.131   3
  -7   8   6 13097.1 552.355   1
  -7   8   6 13373.4 696.968   3
  -7   8   7 2502.78 317.810   3
  -7   8   7 2231.66 239.909   1
  -7   8   8 13787.5 725.056   3
  -7   8   8 13860.8 602.577   1
  -7   8   9 208.689 151.117   3
  -7   8   9 336.584 136.679   1
  -7   8  10 12183.8 604.004   1
  -7   8  10 11330.6 673.433   3
  -7   8  11 1276.59 262.392   3
  -7   8  11 1591.01 235.238   1
  -7   8  12 12389.0 640.750   1
  -7   8  12 11137.5 684.487   3
  -7   8  13 2954.91 360.399   3
  -7   8  13 3356.58 359.444   1
  -7   8  14 8970.39 582.053   1
  -7   8  14 9630.25 665.239   3
  -7   8  15 3943.18 436.011   3
  -7   8  15 4458.87 437.795   1
  -7   8  16 651.570 214.981   1
  -7   8  17 2610.71 358.404   1
  -7   8  17 2000.41 385.523   6
  -7   8  18-244.417 162.516   1
  -7   8  18 90.1458 179.959   6
  -7   8  19 4284.82 559.099   6
  -7   9 -13-302.352 225.545   3
  -7   9 -12 3407.39 414.395   3
  -7   9 -11 877.718 246.036   3
  -7   9 -10 4247.60 443.931   3
  -7   9  -9 3117.16 389.236   3
  -7   9  -8 3847.87 421.304   3
  -7   9  -7 7315.08 560.911   3
  -7   9  -6 4219.08 359.359   2
  -7   9  -6 4132.36 416.864   3
  -7   9  -5 4578.30 372.317   2
  -7   9  -5 4606.22 437.016   3
  -7   9  -4 188.667 127.855   2
  -7   9  -4 252.679 141.228   3
  -7   9  -3 12177.1 701.325   3
  -7   9  -3 11980.0 595.176   2
  -7   9  -2 150.418 167.972   3
  -7   9  -1 28368.8 1063.49   3
  -7   9   0 733.987 188.352   3
  -7   9   1 5830.13 472.879   3
  -7   9   2 6712.94 507.835   3
  -7   9   3 12629.4 699.811   3
  -7   9   4 17936.0 840.096   3
  -7   9   5 3455.88 269.033   1
  -7   9   5 3739.15 394.158   3
  -7   9   6 23774.1 982.251   3
  -7   9   6 24052.7 744.082   1
  -7   9   7 217.197 115.695   1
  -7   9   7 252.075 131.284   3
  -7   9   8 25904.3 835.968   1
  -7   9   8 24970.3 1032.19   3
  -7   9   9 3723.75 414.766   3
  -7   9   9 3884.55 327.847   1
  -7   9  10 2042.76 314.312   3
  -7   9  10 2261.45 267.655   1
  -7   9  11 467.148 160.758   3
  -7   9  11 436.755 158.072   1
  -7   9  12 8483.35 534.443   1
  -7   9  12 8094.90 625.143   3
  -7   9  13 2200.53 345.897   3
  -7   9  13 2274.52 301.701   1
  -7   9  14 1918.01 337.935   3
  -7   9  14 1670.13 286.517   1
  -7   9  15 7923.20 635.287   3
  -7   9  15 8289.59 580.703   1
  -7   9  16 612.443 200.484   1
  -7   9  17 2272.65 399.369   6
  -7   9  17 2333.50 342.609   1
  -7   9  18-86.0641 136.141   1
  -7  10 -12 4483.80 480.073   3
  -7  10 -11 1140.74 255.829   3
  -7  10 -10 5161.89 496.743   3
  -7  10  -9 4751.92 471.400   3
  -7  10  -8 1106.76 250.915   3
  -7  10  -7 5092.25 490.058   3
  -7  10  -6-150.102 159.276   3
  -7  10  -5 9338.77 643.726   3
  -7  10  -4 946.900 236.364   3
  -7  10  -3 10321.6 651.906   3
  -7  10  -2 397.261 162.049   3
  -7  10  -1 9238.44 623.736   3
  -7  10   0 2052.04 313.748   3
  -7  10   1 4803.70 453.661   3
  -7  10   2 21078.4 937.392   3
  -7  10   3 1902.64 294.425   3
  -7  10   4 15529.8 811.413   3
  -7  10   5 2952.59 358.582   3
  -7  10   6 16715.0 847.748   3
  -7  10   7 614.450 216.054   3
  -7  10   8 12135.9 750.363   3
  -7  10   9 2395.13 348.247   3
  -7  10  10 8875.40 658.743   3
  -7  10  11 4833.36 490.715   3
  -7  10  11 5189.74 410.774   1
  -7  10  12 2226.34 352.311   3
  -7  10  12 2637.51 313.640   1
  -7  10  13 7186.33 619.301   3
  -7  10  13 6452.77 483.092   1
  -7  10  14 717.504 257.184   3
  -7  10  14 154.869 128.663   1
  -7  10  15 7161.56 544.502   1
  -7  10  16 363.149 217.565   6
  -7  10  16 239.407 150.818   1
  -7  10  17 2822.59 374.415   1
  -7  11 -11 3511.17 440.421   3
  -7  11 -10 731.083 240.513   3
  -7  11  -9 4365.64 465.363   3
  -7  11  -8-154.022 152.064   3
  -7  11  -7 4653.46 475.692   3
  -7  11  -6 1964.78 331.733   3
  -7  11  -5 1889.88 315.430   3
  -7  11  -4 432.683 197.385   3
  -7  11  -3 6517.39 545.394   3
  -7  11  -2 2586.56 353.954   3
  -7  11  -1 2857.42 371.228   3
  -7  11   0 8517.93 616.601   3
  -7  11   1 3153.68 388.825   3
  -7  11   2 6599.29 543.890   3
  -7  11   3 69.7434 129.908   3
  -7  11   4 11865.6 735.437   3
  -7  11   5-118.145 170.553   3
  -7  11   6 9993.71 697.423   3
  -7  11   7 2745.13 389.924   3
  -7  11   8 6405.25 573.335   3
  -7  11   9 5536.04 533.566   3
  -7  11  10 4205.04 476.655   3
  -7  11  11 6316.69 589.983   3
  -7  11  12 637.389 235.005   3
  -7  11  13 8050.04 663.745   3
  -7  11  14-263.452 177.297   3
  -7  12  -9 2633.03 373.513   3
  -7  12  -8 2288.77 361.591   3
  -7  12  -7 5724.36 547.546   3
  -7  12  -6 1874.01 322.983   3
  -7  12  -5 3041.81 398.446   3
  -7  12  -4 3875.03 438.788   3
  -7  12  -3 1756.26 321.815   3
  -7  12  -2 9342.94 669.312   3
  -7  12  -1 434.971 198.325   3
  -7  12   0 7578.43 605.334   3
  -7  12   1 261.508 147.413   3
  -7  12   2 9254.38 673.628   3
  -7  12   3 1893.96 331.479   3
  -7  12   4 6487.72 570.810   3
  -7  12   5 1606.94 311.614   3
  -7  12   6 7718.62 638.549   3
  -7  12   7 6656.36 593.627   3
  -7  12   8 1989.59 343.991   3
  -7  12   9 10016.8 743.690   3
  -7  12  10 1230.24 275.914   3
  -7  12  11 9924.23 758.803   3
  -7  12  12 362.862 236.944   3
  -7  12  13 10031.8 754.194   3
  -7  13  -7 2164.16 378.474   3
  -7  13  -6 3380.61 442.912   3
  -7  13  -5 970.519 244.261   3
  -7  13  -4 5572.95 543.098   3
  -7  13  -3 166.224 170.215   3
  -7  13  -2 9172.89 690.381   3
  -7  13  -1 506.605 231.906   3
  -7  13   0 5852.48 555.864   3
  -7  13   1 555.102 210.624   3
  -7  13   2 4735.15 497.363   3
  -7  13   3 1886.62 323.014   3
  -7  13   4 4282.61 495.758   3
  -7  13   5 2851.11 402.342   3
  -7  13   6 1944.78 340.244   3
  -7  13   7 5246.53 559.056   3
  -7  13   8 1196.17 279.751   3
  -7  13   9 10669.8 786.476   3
  -7  13  10 205.696 146.893   3
  -7  13  11 9104.21 739.432   3
  -7  14  -3 107.560 176.239   3
  -7  14  -2 4751.65 519.454   3
  -7  14  -1 1607.43 330.731   3
  -7  14   0 1144.85 272.133   3
  -7  14   1 1057.49 250.395   3
  -7  14   2 2716.42 407.040   3
  -7  14   3 4836.38 539.655   3
  -7  14   4 1840.02 367.657   3
  -7  14   5 9404.15 759.832   3
  -7  14   6 727.069 269.709   3
  -6 -11   3 5291.58 548.383   5
  -6 -11   4 926.301 318.605   5
  -6 -11   5 4098.97 503.287   5
  -6 -11   6 3360.97 507.181   5
  -6 -11   7 495.353 244.342   5
  -6 -10  -6 2437.83 371.005   2
  -6 -10  -5 2890.21 414.045   2
  -6 -10  -4 2584.34 388.211   2
  -6 -10  -3 4825.38 506.381   2
  -6 -10  -2 146.785 187.763   2
  -6 -10  -1 7989.15 629.381   2
  -6 -10   0 367.084 247.329   2
  -6 -10   1 5493.35 517.197   2
  -6 -10   2 221.763 184.197   5
  -6 -10   2 102.600 163.517   2
  -6 -10   3 6093.78 559.618   5
  -6 -10   4 355.196 215.327   5
  -6 -10   5 6810.37 592.556   5
  -6 -10   6 7573.75 651.520   5
  -6 -10   7 328.523 301.501   5
  -6 -10   8 2445.52 411.257   5
  -6 -10   8 1945.50 405.729   1
  -6 -10   9-362.202 205.049   5
  -6 -10   9-378.829 208.828   1
  -6 -10  10 5357.82 573.331   1
  -6 -10  10 3784.36 513.930   5
  -6 -10  11 524.809 228.944   1
  -6  -9  -7 2031.73 355.139   2
  -6  -9  -6 1478.61 347.113   2
  -6  -9  -5 5012.20 509.171   2
  -6  -9  -4 313.939 216.040   2
  -6  -9  -3 6250.63 556.455   2
  -6  -9  -2 731.452 241.242   2
  -6  -9  -1 7157.25 581.257   2
  -6  -9   0 196.719 175.340   2
  -6  -9   1 3579.96 384.596   5
  -6  -9   1 2907.42 382.451   2
  -6  -9   2 1511.57 278.268   5
  -6  -9   2 1584.03 313.633   2
  -6  -9   3 6002.70 521.483   2
  -6  -9   3 6474.36 543.647   5
  -6  -9   4 4904.52 480.079   5
  -6  -9   4 3858.11 431.728   2
  -6  -9   5 452.033 200.471   2
  -6  -9   5 210.956 196.469   5
  -6  -9   6 6026.46 552.992   5
  -6  -9   6 5316.62 495.058   2
  -6  -9   7 700.637 247.360   5
  -6  -9   8 7561.52 684.965   1
  -6  -9   8 9036.91 709.298   5
  -6  -9   9 46.6329 199.768   5
  -6  -9   9 396.472 196.170   1
  -6  -9  10 2386.06 395.251   1
  -6  -9  11 3171.94 456.621   1
  -6  -9  12 4327.32 543.524   1
  -6  -9  13 1163.55 305.035   1
  -6  -8  -9 3122.45 419.623   2
  -6  -8  -8 348.375 155.140   2
  -6  -8  -7 3336.69 427.947   2
  -6  -8  -6 98.8563 165.221   2
  -6  -8  -5 6559.05 570.792   2
  -6  -8  -4 1213.99 270.404   2
  -6  -8  -3 12075.3 757.181   2
  -6  -8  -2 268.788 177.908   2
  -6  -8  -1 4762.75 470.575   2
  -6  -8   0 4051.17 440.038   2
  -6  -8   0 4341.80 398.482   5
  -6  -8   1 3709.75 376.428   5
  -6  -8   1 3803.12 431.727   2
  -6  -8   2 10244.1 615.331   5
  -6  -8   2 9605.69 664.257   2
  -6  -8   3 2009.52 311.939   2
  -6  -8   3 2675.57 356.083   5
  -6  -8   4 7496.58 590.991   2
  -6  -8   4 7903.18 569.972   5
  -6  -8   5 876.874 229.339   5
  -6  -8   5 1144.00 257.824   2
  -6  -8   6 9895.34 660.954   5
  -6  -8   6 8829.63 636.132   2
  -6  -8   7 177.773 193.783   5
  -6  -8   7-77.7635 131.529   2
  -6  -8   8 4925.01 544.045   1
  -6  -8   8 6419.15 571.264   5
  -6  -8   9 1291.21 334.745   1
  -6  -8  10 2241.43 379.042   1
  -6  -8  11 3722.70 507.095   1
  -6  -8  12 2798.30 436.473   1
  -6  -8  13 2261.40 367.908   1
  -6  -8  14 309.896 190.762   1
  -6  -8  15 4816.50 557.804   1
  -6  -7 -10 341.985 189.203   2
  -6  -7  -9 3083.16 437.121   2
  -6  -7  -8-35.3043 164.783   2
  -6  -7  -7 4569.29 489.467   2
  -6  -7  -6-177.963 204.172   2
  -6  -7  -5 3029.56 391.438   2
  -6  -7  -4 3060.87 398.565   2
  -6  -7  -3 11298.3 727.194   2
  -6  -7  -2 953.447 254.927   2
  -6  -7  -1 4458.76 460.710   2
  -6  -7  -1 4550.25 358.646   5
  -6  -7   0 7694.19 594.992   2
  -6  -7   0 7340.60 471.873   5
  -6  -7   1 3646.51 407.957   2
  -6  -7   1 3420.19 338.623   5
  -6  -7   2 10655.9 693.129   2
  -6  -7   2 9588.54 555.849   5
  -6  -7   3 975.490 245.222   2
  -6  -7   3 1993.89 306.186   5
  -6  -7   4 8773.35 631.511   2
  -6  -7   4 8884.81 572.585   5
  -6  -7   5 33.4566 142.767   5
  -6  -7   5-220.992 201.830   2
  -6  -7   6 9069.89 638.899   2
  -6  -7   6 10621.2 636.542   5
  -6  -7   7 756.477 208.803   2
  -6  -7   8 4190.78 489.659   1
  -6  -7   9 6385.45 589.729   1
  -6  -7  10 4138.29 495.620   1
  -6  -7  11 3219.19 443.627   1
  -6  -7  12-316.780 200.647   1
  -6  -7  13 8121.96 695.337   1
  -6  -7  14-407.152 211.632   1
  -6  -7  15 7744.27 691.710   1
  -6  -7  16 1173.75 312.919   1
  -6  -6 -11 4796.85 531.370   2
  -6  -6 -10 268.319 171.679   2
  -6  -6  -9 4791.10 537.159   2
  -6  -6  -8 728.709 253.505   2
  -6  -6  -7 7196.71 614.914   2
  -6  -6  -6 2723.93 369.302   2
  -6  -6  -5 6723.80 576.516   2
  -6  -6  -4 7326.83 602.852   2
  -6  -6  -3 7461.08 590.923   2
  -6  -6  -2 3159.74 386.416   2
  -6  -6  -1 509.405 200.941   2
  -6  -6  -1 970.647 187.461   5
  -6  -6   0 10644.5 526.429   5
  -6  -6   0 10051.7 668.670   2
  -6  -6   1 453.793 178.236   2
  -6  -6   1 507.344 171.015   5
  -6  -6   2 15267.6 672.902   5
  -6  -6   2 16151.2 850.762   2
  -6  -6   3 502.693 167.042   5
  -6  -6   3 522.712 191.298   2
  -6  -6   4 9512.00 651.835   2
  -6  -6   5 801.200 202.244   2
  -6  -6   6 7753.04 590.761   2
  -6  -6   7 5876.62 513.239   2
  -6  -6   8 6695.38 578.348   1
  -6  -6   9 13556.5 831.904   1
  -6  -6  10 329.997 186.795   1
  -6  -6  11 7397.97 623.523   1
  -6  -6  12 546.556 208.232   1
  -6  -6  13 9452.62 726.481   1
  -6  -6  14 304.724 181.587   1
  -6  -6  15 5965.34 588.579   1
  -6  -6  16 2455.93 392.310   1
  -6  -6  17 2201.81 364.439   1
  -6  -5 -13 6826.66 660.042   2
  -6  -5 -12 187.731 172.972   2
  -6  -5 -11 8193.59 690.486   2
  -6  -5 -10 672.264 278.406   2
  -6  -5  -9 8158.50 662.161   2
  -6  -5  -8 2192.44 387.836   2
  -6  -5  -7 5347.67 535.092   2
  -6  -5  -6 5723.29 526.500   2
  -6  -5  -5 3190.09 387.418   2
  -6  -5  -4 7285.38 590.710   2
  -6  -5  -3 61.3223 156.367   2
  -6  -5  -2 12940.8 771.229   2
  -6  -5  -1 259.730 143.513   2
  -6  -5   0 7854.76 586.272   2
  -6  -5   1 72.5618 165.212   2
  -6  -5   2 6866.78 552.099   2
  -6  -5   3 173.661 130.640   2
  -6  -5   4 12526.6 739.767   2
  -6  -5   5 6411.41 534.233   2
  -6  -5   6 5188.20 483.017   2
  -6  -5   7 4985.10 482.125   2
  -6  -5   8 3534.24 417.057   1
  -6  -5   9 10433.4 709.217   1
  -6  -5  10 594.048 191.208   1
  -6  -5  11 11715.5 755.790   1
  -6  -5  12 141.302 177.626   1
  -6  -5  13 8746.20 666.691   1
  -6  -5  14 1725.56 319.046   1
  -6  -5  15 3607.75 457.815   1
  -6  -5  16 5263.91 553.821   1
  -6  -5  17 2240.26 372.155   1
  -6  -5  18 6778.29 615.725   1
  -6  -4 -13 7185.04 660.388   2
  -6  -4 -12-432.153 257.982   2
  -6  -4 -11 4137.96 494.177   2
  -6  -4 -10 4761.42 512.137   2
  -6  -4  -9 7812.10 655.314   2
  -6  -4  -8 10947.6 760.268   2
  -6  -4  -7 1651.99 326.624   2
  -6  -4  -6 10486.7 714.263   2
  -6  -4  -5 513.657 192.461   2
  -6  -4  -4 5461.12 507.121   2
  -6  -4  -3 70.0063 151.366   2
  -6  -4  -2 9850.57 680.605   2
  -6  -4  -1 1014.95 221.538   2
  -6  -4   0 6776.69 550.100   2
  -6  -4   1 3105.18 377.537   2
  -6  -4   2 4709.30 444.235   2
  -6  -4   3 5314.50 474.100   2
  -6  -4   4 6932.73 536.768   2
  -6  -4   5 6442.50 519.076   2
  -6  -4   6 1160.86 242.997   2
  -6  -4   7 7817.58 575.193   2
  -6  -4   8-45.6674 148.414   1
  -6  -4   9 9635.83 648.787   1
  -6  -4  10 240.418 152.902   1
  -6  -4  11 12045.1 736.169   1
  -6  -4  12 1166.51 255.843   1
  -6  -4  13 5915.88 528.966   1
  -6  -4  14 6433.83 570.180   1
  -6  -4  15 1494.14 293.279   1
  -6  -4  16 8306.68 648.931   1
  -6  -4  17 45.4189 202.862   1
  -6  -4  18 5826.41 567.952   1
  -6  -4  19 455.694 219.507   1
  -6  -3 -14 1807.14 363.262   2
  -6  -3 -13 7622.34 694.180   2
  -6  -3 -12 3975.25 499.440   2
  -6  -3 -11 2621.58 374.955   2
  -6  -3 -10 10691.2 772.563   2
  -6  -3  -9 3719.59 470.545   2
  -6  -3  -8 8779.04 687.716   2
  -6  -3  -7 249.595 169.367   2
  -6  -3  -6 9005.98 665.970   2
  -6  -3  -5 508.873 180.904   2
  -6  -3  -4 10381.8 692.910   2
  -6  -3  -3 2500.12 348.250   2
  -6  -3  -2 11881.6 728.004   2
  -6  -3  -1 13802.0 772.862   2
  -6  -3   0 4352.58 427.237   2
  -6  -3   1 12296.0 713.965   2
  -6  -3   2 3343.58 364.743   2
  -6  -3   3 11819.0 689.055   2
  -6  -3   4 267.737 126.821   2
  -6  -3   5 8664.92 591.905   2
  -6  -3   6 107.016 119.015   2
  -6  -3   7 7259.05 539.533   2
  -6  -3   7 8116.10 560.436   1
  -6  -3   8 187.116 71.7997   3
  -6  -3   8 233.034 128.293   1
  -6  -3   9 6554.81 506.420   1
  -6  -3  10 1417.50 247.096   1
  -6  -3  11 10480.5 656.934   1
  -6  -3  12 3151.86 378.679   1
  -6  -3  13 2918.45 356.785   1
  -6  -3  14 12258.0 734.951   1
  -6  -3  15 1179.81 252.074   1
  -6  -3  16 18403.6 943.798   1
  -6  -3  17-266.653 171.813   1
  -6  -3  18 4168.37 478.266   1
  -6  -3  19 1196.65 305.056   1
  -6  -2 -15 6851.61 670.164   2
  -6  -2 -14 1102.37 318.162   2
  -6  -2 -13 6269.55 609.648   2
  -6  -2 -12 6960.85 652.075   2
  -6  -2 -11 3120.57 425.777   2
  -6  -2 -10 9384.48 716.174   2
  -6  -2  -9 546.972 208.711   2
  -6  -2  -8 32314.1 1293.18   2
  -6  -2  -7 8882.16 661.457   2
  -6  -2  -6 7425.08 596.241   2
  -6  -2  -5 5111.89 483.976   2
  -6  -2  -4 6176.83 528.570   2
  -6  -2  -3 10931.3 682.426   2
  -6  -2  -2 6680.83 534.792   2
  -6  -2  -1 18186.7 868.979   2
  -6  -2   0 2237.12 324.406   2
  -6  -2   1 17601.7 834.099   2
  -6  -2   2 129.060 132.400   2
  -6  -2   3 13609.3 719.247   2
  -6  -2   4 1624.94 245.540   2
  -6  -2   5 8300.02 557.517   2
  -6  -2   6 1301.53 222.026   2
  -6  -2   7 10320.2 401.200   3
  -6  -2   7 11435.4 630.148   1
  -6  -2   7 11013.6 644.493   2
  -6  -2   8 2984.48 327.514   1
  -6  -2   8 2211.37 178.758   3
  -6  -2   9 7547.15 521.462   1
  -6  -2   9 6693.07 289.642   3
  -6  -2  10 9631.08 602.556   1
  -6  -2  11 524.241 187.841   1
  -6  -2  12 10107.1 638.797   1
  -6  -2  13 1254.40 264.436   1
  -6  -2  14 11552.5 699.305   1
  -6  -2  15 199.533 151.216   1
  -6  -2  16 11665.9 729.423   1
  -6  -2  17-183.679 152.412   1
  -6  -2  18 1191.17 275.176   1
  -6  -2  19 5759.99 548.469   1
  -6  -2  20 2773.67 401.348   1
  -6  -1 -16 991.302 300.664   2
  -6  -1 -15 8844.66 754.316   2
  -6  -1 -14 7094.22 667.726   2
  -6  -1 -13 1497.53 326.614   2
  -6  -1 -12 9760.98 742.909   2
  -6  -1 -11 507.099 204.995   2
  -6  -1 -10 18369.8 980.953   2
  -6  -1  -9 1718.72 317.764   2
  -6  -1  -8 23196.2 1065.26   2
  -6  -1  -7 2957.89 389.766   2
  -6  -1  -6 17634.6 887.373   2
  -6  -1  -5 17183.9 858.483   2
  -6  -1  -4 7147.32 543.868   2
  -6  -1  -3 12602.1 715.712   2
  -6  -1  -2 357.867 197.075   2
  -6  -1  -1 36112.3 1193.78   2
  -6  -1   0 69.7939 146.088   2
  -6  -1   1 18987.2 832.918   2
  -6  -1   2 632.535 163.224   2
  -6  -1   3 10893.8 612.334   2
  -6  -1   4 11135.9 629.089   2
  -6  -1   5 20230.8 854.740   2
  -6  -1   6 7721.79 360.101   3
  -6  -1   6 7744.07 521.186   2
  -6  -1   6 8270.79 513.752   1
  -6  -1   7 21617.7 847.212   1
  -6  -1   7 20478.5 590.115   3
  -6  -1   7 21631.5 887.160   2
  -6  -1   8 13017.9 447.063   3
  -6  -1   8 14129.2 683.055   1
  -6  -1   9 1433.81 146.136   3
  -6  -1   9 1777.19 258.735   1
  -6  -1  10 10373.7 364.400   3
  -6  -1  10 11169.7 623.188   1
  -6  -1  11 34.6930 122.567   1
  -6  -1  12 5959.91 476.224   1
  -6  -1  13 161.582 133.691   1
  -6  -1  14 9854.73 632.546   1
  -6  -1  15 556.452 181.124   1
  -6  -1  16 5213.32 480.910   1
  -6  -1  17 2942.33 374.747   1
  -6  -1  18 4714.67 481.657   1
  -6  -1  19 3891.83 449.314   1
  -6  -1  20 1568.64 312.851   1
  -6   0 -16 4429.01 551.251   2
  -6   0 -15 1455.98 337.624   2
  -6   0 -14 9179.52 731.023   2
  -6   0 -13 370.285 205.383   2
  -6   0 -12 12939.9 830.588   2
  -6   0 -11 43.8676 171.841   2
  -6   0 -10 13840.6 820.365   2
  -6   0  -9 269.283 194.666   2
  -6   0  -8 12720.7 760.394   2
  -6   0  -7 3285.54 386.956   2
  -6   0  -6 8306.66 588.261   2
  -6   0  -5 23831.3 975.221   2
  -6   0  -4 1956.81 292.899   2
  -6   0  -3 30380.8 1067.98   2
  -6   0  -2 155.273 141.207   2
  -6   0  -1 38725.3 1188.55   2
  -6   0   0 4059.68 379.308   2
  -6   0   1 19198.7 798.553   2
  -6   0   2 13308.9 665.616   2
  -6   0   3 2818.95 300.566   2
  -6   0   4 50273.0 1352.11   2
  -6   0   5 7892.17 509.669   2
  -6   0   5 7609.60 367.457   3
  -6   0   6 116.647 76.0202   3
  -6   0   6 260.514 117.550   2
  -6   0   6 236.137 114.726   1
  -6   0   7 8736.83 377.772   3
  -6   0   7 9207.66 528.113   1
  -6   0   8 10997.4 584.287   1
  -6   0   8 9699.56 390.068   3
  -6   0   9 100.684 97.9188   1
  -6   0   9 85.2478 54.1044   3
  -6   0  10 8667.83 540.138   1
  -6   0  10 8563.40 354.553   3
  -6   0  11 714.575 176.773   1
  -6   0  11 437.582 73.0785   3
  -6   0  12 5958.19 468.847   1
  -6   0  13 1766.50 267.141   1
  -6   0  14 8434.03 575.316   1
  -6   0  15 2446.81 331.563   1
  -6   0  16 4154.83 422.719   1
  -6   0  17 5020.75 483.783   1
  -6   0  18 2238.42 333.011   1
  -6   0  19 4597.31 481.920   1
  -6   0  20-130.625 143.039   1
  -6   1 -17 590.775 260.095   2
  -6   1 -16 8509.77 721.541   2
  -6   1 -15 1472.02 302.159   2
  -6   1 -14 10039.5 738.831   2
  -6   1 -13 165.285 177.443   2
  -6   1 -12 8646.76 656.998   2
  -6   1 -11 1496.36 290.141   2
  -6   1 -10 14332.6 816.305   2
  -6   1  -9 3817.17 410.111   2
  -6   1  -8 4103.28 401.185   2
  -6   1  -7 15234.1 773.098   2
  -6   1  -6 1588.33 270.738   2
  -6   1  -5 32271.6 1102.01   2
  -6   1  -4 331.886 158.992   2
  -6   1  -3 36361.6 1133.92   2
  -6   1  -2 7002.01 485.086   2
  -6   1  -1 16762.2 726.139   2
  -6   1   0 5284.09 405.971   2
  -6   1   1 18529.1 758.052   2
  -6   1   2 26417.2 917.696   2
  -6   1   3 6895.46 459.819   2
  -6   1   4 19493.0 785.889   2
  -6   1   4 19346.8 632.190   3
  -6   1   5 133.472 76.7081   3
  -6   1   5 9.32580 115.132   1
  -6   1   5 82.9934 133.987   2
  -6   1   6 29951.1 932.376   1
  -6   1   6 28275.1 753.787   3
  -6   1   6 29025.8 984.241   2
  -6   1   7 2492.03 273.253   1
  -6   1   7 2623.82 214.873   3
  -6   1   8 13688.9 637.048   1
  -6   1   8 13051.3 476.471   3
  -6   1   9 2984.76 222.982   3
  -6   1   9 3215.92 316.924   1
  -6   1  10 11561.1 450.835   3
  -6   1  10 13151.5 651.883   1
  -6   1  11 2012.47 191.170   3
  -6   1  11 2399.52 294.135   1
  -6   1  12 3562.62 355.297   1
  -6   1  12 3261.23 237.299   3
  -6   1  13 2414.42 306.212   1
  -6   1  14 2480.49 313.956   1
  -6   1  15 7521.85 544.525   1
  -6   1  16 1075.55 214.191   6
  -6   1  16 1007.85 221.724   1
  -6   1  17 6672.49 544.784   1
  -6   1  18 191.109 156.468   1
  -6   1  19 6253.73 554.803   1
  -6   1  20 846.383 251.266   1
  -6   2 -18 3893.52 487.061   2
  -6   2 -17-406.051 270.961   2
  -6   2 -16 4546.41 517.156   2
  -6   2 -15 236.041 197.698   2
  -6   2 -14 4648.17 489.406   2
  -6   2 -13 3798.22 427.996   2
  -6   2 -12 7493.24 595.649   2
  -6   2 -11 8178.58 611.440   2
  -6   2 -10 15107.3 789.313   2
  -6   2  -9 299.530 136.293   2
  -6   2  -8 563.272 163.972   2
  -6   2  -7 31385.7 1083.09   2
  -6   2  -6 37.3621 119.280   2
  -6   2  -5 28544.4 987.150   2
  -6   2  -4 1742.10 253.597   2
  -6   2  -3 17172.5 732.325   2
  -6   2  -2 6486.45 439.239   2
  -6   2  -1 13829.9 634.718   2
  -6   2   0 17842.6 726.645   2
  -6   2   1 4840.06 371.059   2
  -6   2   2 34891.8 929.324   3
  -6   2   2 35524.6 1053.35   2
  -6   2   3 491.053 150.507   2
  -6   2   3 560.078 126.669   3
  -6   2   4 28053.0 796.174   3
  -6   2   4 29973.2 885.610   1
  -6   2   4 29231.5 952.554   2
  -6   2   5 5439.52 326.187   3
  -6   2   5 5341.32 402.661   2
  -6   2   5 5884.37 385.445   1
  -6   2   6 36963.8 906.620   3
  -6   2   6 39639.3 1062.66   1
  -6   2   7 4663.77 349.862   1
  -6   2   7 4489.24 291.056   3
  -6   2   8 9489.22 520.833   1
  -6   2   8 9607.23 424.236   3
  -6   2   9 8512.02 403.602   3
  -6   2   9 9575.08 536.507   1
  -6   2  10 5352.81 408.678   1
  -6   2  10 4931.73 307.355   3
  -6   2  11 12134.3 628.662   1
  -6   2  11 11123.1 481.826   3
  -6   2  12 2188.94 282.122   1
  -6   2  12 1667.58 191.326   3
  -6   2  13 3999.57 379.736   1
  -6   2  13 3379.88 263.191   3
  -6   2  14 375.146 126.628   1
  -6   2  15 5404.36 462.238   1
  -6   2  16-11.6235 146.454   1
  -6   2  16-94.5850 170.731   6
  -6   2  17 4071.89 403.024   6
  -6   2  17 4072.20 423.664   1
  -6   2  18-76.6765 146.018   1
  -6   2  19 8305.20 622.585   1
  -6   2  20 3814.68 444.438   1
  -6   2  21 1144.24 286.010   1
  -6   3 -18 5279.02 566.948   2
  -6   3 -17 3371.57 457.030   2
  -6   3 -16 1977.98 351.029   2
  -6   3 -15 1859.74 316.685   2
  -6   3 -14 4918.93 489.029   2
  -6   3 -13 5937.65 515.904   2
  -6   3 -12 4598.45 449.072   2
  -6   3 -11 5494.89 466.705   2
  -6   3 -10 2512.62 302.357   2
  -6   3  -9 21823.7 897.035   2
  -6   3  -8 96.0170 127.429   2
  -6   3  -7 24948.7 916.081   2
  -6   3  -6 2640.92 302.543   2
  -6   3  -5 15402.8 685.240   2
  -6   3  -4 3673.37 324.820   2
  -6   3  -3 7787.02 467.583   2
  -6   3  -2 29308.6 922.997   2
  -6   3  -1 3992.76 325.130   2
  -6   3   0 37988.3 1016.82   3
  -6   3   0 37582.1 1056.89   2
  -6   3   1 5476.02 358.128   3
  -6   3   1 5265.80 378.589   2
  -6   3   2 47182.8 1122.81   3
  -6   3   2 47670.1 1214.31   2
  -6   3   3 3419.70 306.448   2
  -6   3   3 4046.80 303.811   1
  -6   3   3 3781.08 292.216   3
  -6   3   4 27524.3 910.543   2
  -6   3   4 29553.6 859.834   1
  -6   3   4 27878.1 810.006   3
  -6   3   5 10021.5 465.640   3
  -6   3   5 11103.3 517.786   1
  -6   3   6 17298.4 613.239   3
  -6   3   6 18590.1 690.230   1
  -6   3   7 22456.9 782.387   1
  -6   3   7 20270.9 665.990   3
  -6   3   8 7195.90 441.914   1
  -6   3   8 6964.64 382.817   3
  -6   3   9 23681.8 732.387   3
  -6   3   9 24084.0 849.707   1
  -6   3  10 3935.13 346.558   1
  -6   3  10 3385.04 273.939   3
  -6   3  11 13766.8 573.857   3
  -6   3  11 14436.1 673.702   1
  -6   3  12 657.394 161.449   1
  -6   3  12 581.236 123.224   3
  -6   3  13 13494.0 685.918   1
  -6   3  13 12731.7 567.024   3
  -6   3  14 4131.75 314.221   3
  -6   3  14 4605.39 404.104   1
  -6   3  15 6652.76 505.922   1
  -6   3  16 1522.28 271.193   1
  -6   3  17 3906.56 417.017   6
  -6   3  17 3461.33 382.371   1
  -6   3  18 7554.42 569.714   6
  -6   3  18 7865.65 592.240   1
  -6   3  19 3267.25 396.363   1
  -6   3  20 1574.90 306.908   1
  -6   3  21 314.580 178.348   1
  -6   4 -18 1827.47 335.093   2
  -6   4 -17 1159.72 269.562   2
  -6   4 -16 5770.15 532.299   2
  -6   4 -15 10605.7 700.875   2
  -6   4 -14 1610.75 308.714   2
  -6   4 -13 10808.4 668.241   2
  -6   4 -12 83.1809 141.351   2
  -6   4 -11 9095.17 576.374   2
  -6   4 -10 76.4634 129.185   2
  -6   4  -9 21549.3 852.748   2
  -6   4  -8 253.424 137.941   2
  -6   4  -7 7970.11 488.314   2
  -6   4  -6 7140.72 452.222   2
  -6   4  -5 12747.7 600.825   2
  -6   4  -4 7292.20 447.121   2
  -6   4  -3 8516.43 471.666   2
  -6   4  -2 20776.7 760.971   3
  -6   4  -2 18419.8 706.305   2
  -6   4  -1 899.567 169.991   3
  -6   4  -1 601.025 130.327   2
  -6   4   0 43073.3 1108.70   3
  -6   4   0 41669.3 1102.89   2
  -6   4   1 432.964 148.887   2
  -6   4   1 351.322 145.351   3
  -6   4   2 36661.5 1036.59   2
  -6   4   2 36686.8 924.208   1
  -6   4   2 36262.3 984.404   3
  -6   4   3 5047.28 368.683   2
  -6   4   3 5361.21 341.294   1
  -6   4   3 5057.77 343.229   3
  -6   4   4 33086.3 918.551   3
  -6   4   4 34102.3 909.738   1
  -6   4   4 33640.6 1002.86   2
  -6   4   5 18127.3 655.954   1
  -6   4   5 17066.2 636.644   3
  -6   4   6 11143.7 508.321   3
  -6   4   6 11971.5 541.522   1
  -6   4   7 21517.5 718.700   3
  -6   4   7 23271.6 781.215   1
  -6   4   8 3391.49 285.019   3
  -6   4   8 2837.19 285.865   1
  -6   4   9 32323.1 918.215   3
  -6   4   9 34925.3 1014.32   1
  -6   4  10 1265.69 185.537   3
  -6   4  10 1894.16 244.478   1
  -6   4  11 22547.8 838.754   1
  -6   4  11 22392.1 780.431   3
  -6   4  12 3652.27 349.502   1
  -6   4  12 3264.39 303.621   3
  -6   4  13 11079.3 568.003   3
  -6   4  13 12161.8 645.026   1
  -6   4  14 2599.40 308.578   1
  -6   4  14 2345.50 280.008   3
  -6   4  15 1975.88 280.399   1
  -6   4  16 4565.15 432.254   1
  -6   4  17 2149.61 320.679   1
  -6   4  17 2339.79 344.949   6
  -6   4  18 6831.33 581.446   6
  -6   4  18 6339.18 533.140   1
  -6   4  19 1920.34 334.534   6
  -6   4  19 1797.43 314.167   1
  -6   4  20 3128.55 415.542   1
  -6   5 -18 133.137 183.553   2
  -6   5 -17 7577.01 598.767   2
  -6   5 -16 2914.10 383.474   2
  -6   5 -15 8516.18 604.179   2
  -6   5 -14 349.508 185.943   2
  -6   5 -13 5784.41 468.478   2
  -6   5 -12 1350.38 220.259   2
  -6   5 -11 8319.65 533.026   2
  -6   5 -10 1058.07 201.286   2
  -6   5  -9 5368.78 401.206   2
  -6   5  -8 3049.96 305.608   2
  -6   5  -7 7526.10 461.513   2
  -6   5  -6 6755.63 461.694   3
  -6   5  -6 7124.81 442.861   2
  -6   5  -5 5859.60 419.702   3
  -6   5  -5 5779.66 383.292   2
  -6   5  -4 7253.16 463.418   3
  -6   5  -4 6763.09 415.630   2
  -6   5  -3 4400.62 354.577   3
  -6   5  -3 4059.27 325.337   2
  -6   5  -2 26525.8 844.915   2
  -6   5  -2 28047.6 907.866   3
  -6   5  -1 2301.93 246.837   2
  -6   5  -1 2837.52 289.171   3
  -6   5   0 37043.0 877.284   1
  -6   5   0 37324.4 1041.21   3
  -6   5   0 37007.7 1025.76   2
  -6   5   1 6184.02 400.033   2
  -6   5   1 6024.01 400.062   3
  -6   5   1 6007.48 330.766   1
  -6   5   2 25912.9 837.046   3
  -6   5   2 25965.9 732.750   1
  -6   5   2 25913.1 847.528   2
  -6   5   3 22155.7 789.653   2
  -6   5   3 22529.7 772.083   3
  -6   5   3 22985.5 696.748   1
  -6   5   4 9942.49 454.617   1
  -6   5   4 9632.82 493.408   3
  -6   5   5 4856.48 323.050   1
  -6   5   5 4747.83 343.876   3
  -6   5   6 1205.97 192.710   3
  -6   5   6 1319.82 182.391   1
  -6   5   7 24336.2 804.149   3
  -6   5   7 25608.7 802.596   1
  -6   5   8 141.243 95.4355   3
  -6   5   8 263.053 115.330   1
  -6   5   9 30517.5 932.182   3
  -6   5   9 30772.9 928.721   1
  -6   5  10 2804.47 288.941   3
  -6   5  10 3163.39 299.934   1
  -6   5  11 21509.9 809.743   1
  -6   5  11 21316.1 804.619   3
  -6   5  12 4206.81 373.281   3
  -6   5  12 4749.98 393.742   1
  -6   5  13 12399.9 643.581   1
  -6   5  13 11169.4 607.720   3
  -6   5  14 8661.46 549.036   1
  -6   5  14 7292.20 501.452   3
  -6   5  15 993.284 198.814   1
  -6   5  16 6740.37 516.124   1
  -6   5  17 381.887 165.921   1
  -6   5  17 570.942 195.514   6
  -6   5  18 6334.23 523.435   1
  -6   5  18 6551.89 587.424   6
  -6   5  19 261.448 217.625   6
  -6   5  19 65.9958 136.699   1
  -6   5  20 5102.20 538.096   6
  -6   5  20 4534.66 480.739   1
  -6   6 -17 6044.74 534.362   3
  -6   6 -16 191.923 148.283   3
  -6   6 -16 495.838 223.293   2
  -6   6 -15 9676.17 610.352   2
  -6   6 -15 9382.82 654.356   3
  -6   6 -14 459.269 183.005   2
  -6   6 -14 239.456 148.076   3
  -6   6 -13 8001.57 588.367   3
  -6   6 -13 8422.00 537.813   2
  -6   6 -12 5633.98 469.009   3
  -6   6 -12 5768.21 447.196   2
  -6   6 -11 3645.17 377.127   3
  -6   6 -11 3814.25 348.502   2
  -6   6 -10 6282.34 438.056   2
  -6   6 -10 5795.84 458.000   3
  -6   6  -9 2165.15 278.856   3
  -6   6  -9 2555.23 276.389   2
  -6   6  -8 10260.5 536.866   2
  -6   6  -8 9569.13 569.411   3
  -6   6  -7 1764.66 254.019   3
  -6   6  -7 1905.18 242.558   2
  -6   6  -6 12610.8 642.062   3
  -6   6  -6 12939.9 587.580   2
  -6   6  -5 3418.41 326.396   3
  -6   6  -5 3570.07 304.444   2
  -6   6  -4 20577.0 802.902   3
  -6   6  -4 19782.4 722.900   2
  -6   6  -3 4594.60 376.766   3
  -6   6  -3 4083.71 323.378   2
  -6   6  -2 5416.50 398.408   3
  -6   6  -2 5234.28 364.129   2
  -6   6  -1 61.0873 100.547   2
  -6   6  -1 224.072 98.2312   3
  -6   6  -1 79.5022 75.2728   1
  -6   6   0 11497.5 571.682   3
  -6   6   0 11744.0 437.365   1
  -6   6   0 11597.3 547.994   2
  -6   6   1 7733.83 356.415   1
  -6   6   1 8487.56 470.430   2
  -6   6   1 8073.26 474.456   3
  -6   6   2 16398.8 546.019   1
  -6   6   2 16787.9 683.158   3
  -6   6   3 17106.1 569.832   1
  -6   6   3 16289.3 677.703   3
  -6   6   4 4102.12 337.229   3
  -6   6   4 3956.28 279.163   1
  -6   6   5 20090.4 652.374   1
  -6   6   5 19908.3 748.022   3
  -6   6   6 213.224 110.002   1
  -6   6   6 109.760 111.864   3
  -6   6   7 34672.8 1017.69   3
  -6   6   7 34865.9 932.491   1
  -6   6   8 1372.13 196.583   1
  -6   6   8 1329.35 217.282   3
  -6   6   9 28951.6 950.797   3
  -6   6   9 29271.9 893.808   1
  -6   6  10 5647.61 399.813   1
  -6   6  10 6208.89 444.526   3
  -6   6  11 8334.46 491.297   1
  -6   6  11 8385.76 527.488   3
  -6   6  12 10983.1 582.301   1
  -6   6  12 10579.1 608.414   3
  -6   6  13 5761.64 435.750   1
  -6   6  13 5305.07 436.410   3
  -6   6  14 8099.56 546.047   3
  -6   6  14 8609.49 551.470   1
  -6   6  15 1164.59 229.295   1
  -6   6  16 9210.09 608.532   1
  -6   6  17 546.778 197.296   6
  -6   6  17 111.123 134.541   1
  -6   6  18 6057.25 579.668   6
  -6   6  18 5805.43 518.125   1
  -6   6  19 1774.62 362.113   6
  -6   6  19 1684.01 290.477   1
  -6   6  20 3669.22 491.433   6
  -6   6  20 2924.62 412.964   1
  -6   6  21 2743.96 456.388   6
  -6   7 -17 5181.09 506.473   3
  -6   7 -16 2562.07 355.633   3
  -6   7 -15 8659.95 629.805   3
  -6   7 -14 2973.88 364.371   3
  -6   7 -13 3982.29 375.688   2
  -6   7 -13 3921.89 401.819   3
  -6   7 -12 9665.15 548.785   2
  -6   7 -12 9645.63 624.547   3
  -6   7 -11 2463.74 311.997   3
  -6   7 -11 2625.94 284.901   2
  -6   7 -10 11468.8 658.639   3
  -6   7 -10 11377.1 568.300   2
  -6   7  -9 208.784 130.072   2
  -6   7  -9 39.1011 128.472   3
  -6   7  -8 16546.1 769.937   3
  -6   7  -8 16608.0 672.817   2
  -6   7  -7 80.7369 114.390   2
  -6   7  -7 39.4230 123.414   3
  -6   7  -6 7352.94 434.079   2
  -6   7  -6 7443.76 495.823   3
  -6   7  -5 16.3110 111.385   3
  -6   7  -5-48.2667 106.975   2
  -6   7  -4 10426.0 576.238   3
  -6   7  -4 10495.4 514.600   2
  -6   7  -4 9506.26 350.087   1
  -6   7  -3 3890.56 313.085   2
  -6   7  -3 3471.03 210.890   1
  -6   7  -3 3728.62 337.980   3
  -6   7  -2 316.712 111.595   3
  -6   7  -2 285.100 75.4137   1
  -6   7  -2 363.876 119.242   2
  -6   7  -1 3556.92 302.398   2
  -6   7  -1 3442.62 324.876   3
  -6   7  -1 3346.06 209.853   1
  -6   7   0 3279.70 292.296   2
  -6   7   0 2945.32 200.533   1
  -6   7   0 3498.68 324.042   3
  -6   7   1 13547.3 632.563   3
  -6   7   1 13420.0 452.169   1
  -6   7   2 2002.40 183.336   1
  -6   7   2 2138.05 265.277   3
  -6   7   3 23683.6 649.528   1
  -6   7   3 23327.6 842.114   3
  -6   7   4 459.570 104.468   1
  -6   7   4 417.331 147.282   3
  -6   7   5 30895.0 986.547   3
  -6   7   5 31722.8 818.190   1
  -6   7   6 251.006 104.620   1
  -6   7   6 105.745 110.941   3
  -6   7   7 15494.3 696.117   3
  -6   7   7 15306.4 587.295   1
  -6   7   8 8085.82 439.973   1
  -6   7   8 7522.98 492.931   3
  -6   7   9 15250.3 625.006   1
  -6   7   9 14724.9 699.775   3
  -6   7  10 15409.2 733.593   3
  -6   7  10 16574.4 671.755   1
  -6   7  11 649.217 175.571   3
  -6   7  11 598.225 157.145   1
  -6   7  12 15738.0 694.813   1
  -6   7  12 15383.0 760.811   3
  -6   7  13 67.8816 121.217   3
  -6   7  13 351.596 164.727   1
  -6   7  14 12043.7 700.568   3
  -6   7  14 12955.9 672.942   1
  -6   7  15 72.9495 113.233   1
  -6   7  16 5728.08 553.553   6
  -6   7  16 5664.77 482.785   1
  -6   7  17 941.615 226.517   1
  -6   7  17 1028.63 270.392   6
  -6   7  18 8088.39 694.015   6
  -6   7  18 7759.62 594.196   1
  -6   7  19 4011.37 440.602   1
  -6   7  19 4646.23 547.706   6
  -6   7  20 999.054 260.457   1
  -6   7  20 1685.90 403.058   6
  -6   7  21 4433.72 545.606   6
  -6   8 -17 8717.30 659.173   3
  -6   8 -16 7816.87 617.078   3
  -6   8 -15 6206.39 537.126   3
  -6   8 -14 11348.5 713.890   3
  -6   8 -13 814.673 204.227   3
  -6   8 -12 10520.3 664.419   3
  -6   8 -11-67.8218 169.716   3
  -6   8 -11 307.302 141.045   2
  -6   8 -10 10931.3 546.520   2
  -6   8 -10 11096.1 660.073   3
  -6   8  -9 936.521 215.047   3
  -6   8  -9 1014.54 180.419   2
  -6   8  -8 10798.0 632.622   3
  -6   8  -8 10841.0 522.588   2
  -6   8  -7 96.8907 102.175   2
  -6   8  -7-141.874 134.796   3
  -6   8  -6 14202.1 598.859   2
  -6   8  -6 14033.5 701.249   3
  -6   8  -5 10834.8 513.963   2
  -6   8  -5 10612.4 603.300   3
  -6   8  -4 4720.33 409.417   3
  -6   8  -4 4192.11 316.226   2
  -6   8  -3 28164.0 977.811   3
  -6   8  -3 28475.3 853.543   2
  -6   8  -2 3257.81 286.258   2
  -6   8  -2 3257.43 325.452   3
  -6   8  -1 10193.3 576.164   3
  -6   8  -1 9453.96 308.788   1
  -6   8   0 672.847 91.8300   1
  -6   8   0 693.676 180.915   3
  -6   8   1 13998.8 664.547   3
  -6   8   1 13046.5 409.181   1
  -6   8   2 133.703 118.778   3
  -6   8   2 104.229 69.0375   1
  -6   8   3 18982.8 555.001   1
  -6   8   3 18408.1 770.005   3
  -6   8   4 2602.48 212.422   1
  -6   8   4 2474.85 280.561   3
  -6   8   5 15078.4 702.478   3
  -6   8   5 13817.7 509.407   1
  -6   8   6 7220.14 496.385   3
  -6   8   6 6759.35 371.471   1
  -6   8   7 10880.3 605.597   3
  -6   8   7 10641.5 480.828   1
  -6   8   8 10649.9 500.117   1
  -6   8   8 11017.2 625.022   3
  -6   8   9 2903.12 329.254   3
  -6   8   9 3012.55 274.855   1
  -6   8  10 5618.03 390.525   1
  -6   8  10 5057.13 440.458   3
  -6   8  11 3574.52 380.232   3
  -6   8  11 3802.86 333.937   1
  -6   8  12 30980.4 1003.20   1
  -6   8  12 30554.1 1127.03   3
  -6   8  13 3387.46 348.446   1
  -6   8  13 2804.86 354.288   3
  -6   8  14 32480.2 1197.82   3
  -6   8  14 33548.3 1115.02   1
  -6   8  15 547.614 213.209   1
  -6   8  16 6491.87 512.710   1
  -6   8  16 8269.74 685.624   6
  -6   8  17 3938.35 417.883   1
  -6   8  17 4852.46 546.137   6
  -6   8  18 1787.02 352.942   6
  -6   8  18 1708.80 275.942   1
  -6   8  19 6194.43 638.671   6
  -6   8  19 5543.90 509.796   1
  -6   8  20 182.889 212.153   6
  -6   9 -16 9190.50 675.403   3
  -6   9 -15 1004.82 203.995   3
  -6   9 -14 7408.70 585.555   3
  -6   9 -13 291.653 171.808   3
  -6   9 -12 19297.9 925.441   3
  -6   9 -11 837.721 195.886   3
  -6   9 -10 12576.4 719.598   3
  -6   9  -9 5178.80 455.157   3
  -6   9  -8 5683.18 472.293   3
  -6   9  -7 10384.9 501.048   2
  -6   9  -7 10879.5 642.092   3
  -6   9  -6 5613.99 456.116   3
  -6   9  -6 4510.90 327.185   2
  -6   9  -5 11703.5 517.236   2
  -6   9  -5 11105.2 632.588   3
  -6   9  -4 2495.82 320.386   3
  -6   9  -4 2490.34 240.818   2
  -6   9  -3 16817.2 772.217   3
  -6   9  -2 2731.54 314.822   3
  -6   9  -1 4062.41 374.627   3
  -6   9   0 313.363 127.397   3
  -6   9   1 7628.48 505.944   3
  -6   9   2 3719.70 362.767   3
  -6   9   2 3440.81 197.327   1
  -6   9   3 9492.66 574.875   3
  -6   9   3 8989.37 347.444   1
  -6   9   4 5459.75 285.795   1
  -6   9   4 5710.34 449.034   3
  -6   9   5 6651.99 335.397   1
  -6   9   5 5985.21 459.859   3
  -6   9   6 10060.1 602.986   3
  -6   9   6 10615.6 451.737   1
  -6   9   7 5625.73 345.835   1
  -6   9   7 5954.60 473.798   3
  -6   9   8 10060.7 634.748   3
  -6   9   8 10076.4 483.750   1
  -6   9   9 1119.62 215.388   3
  -6   9   9 889.005 167.762   1
  -6   9  10 9971.84 643.040   3
  -6   9  10 11105.9 550.041   1
  -6   9  11 337.531 145.990   1
  -6   9  11 237.733 160.323   3
  -6   9  12 23670.7 877.667   1
  -6   9  12 23036.1 1014.53   3
  -6   9  13 1468.47 296.656   3
  -6   9  13 1466.13 242.627   1
  -6   9  14 9632.84 590.724   1
  -6   9  14 9217.95 657.968   3
  -6   9  15 2027.36 302.227   1
  -6   9  16 3435.77 456.609   6
  -6   9  16 3306.29 371.839   1
  -6   9  17 4802.68 460.944   1
  -6   9  17 6502.82 638.590   6
  -6   9  18 599.586 218.899   6
  -6   9  18 122.591 140.128   1
  -6   9  19 9812.94 810.028   6
  -6   9  19 8419.03 645.688   1
  -6  10 -15-280.362 232.231   3
  -6  10 -14 10847.7 724.439   3
  -6  10 -13 781.109 198.349   3
  -6  10 -12 14104.5 799.560   3
  -6  10 -11 1963.58 324.198   3
  -6  10 -10 18223.2 886.526   3
  -6  10  -9 11223.6 693.445   3
  -6  10  -8 5129.59 463.269   3
  -6  10  -7 10247.5 643.997   3
  -6  10  -6 157.743 143.427   3
  -6  10  -5 11957.9 677.352   3
  -6  10  -4 375.014 146.159   3
  -6  10  -3 14027.0 721.075   3
  -6  10  -2 1270.79 231.388   3
  -6  10  -1 14553.6 732.275   3
  -6  10   0 321.726 140.527   3
  -6  10   1 1675.29 258.412   3
  -6  10   2 8913.37 579.666   3
  -6  10   3 4409.65 408.523   3
  -6  10   4 12191.3 686.949   3
  -6  10   5 3872.34 399.350   3
  -6  10   6 18502.8 870.933   3
  -6  10   6 18580.6 594.950   1
  -6  10   7 265.176 99.6481   1
  -6  10   7 173.927 146.201   3
  -6  10   8 6150.83 378.041   1
  -6  10   8 6546.94 526.634   3
  -6  10   9 197.962 90.3177   1
  -6  10   9 12.1511 133.970   3
  -6  10  10 7975.32 601.749   3
  -6  10  10 7991.50 467.879   1
  -6  10  11 930.078 193.499   1
  -6  10  11 497.857 211.600   3
  -6  10  12 8160.28 516.671   1
  -6  10  12 8413.45 635.067   3
  -6  10  13 5585.48 444.707   1
  -6  10  13 5796.05 543.793   3
  -6  10  14 2907.34 348.962   1
  -6  10  15 6987.86 656.179   6
  -6  10  15 5947.45 497.535   1
  -6  10  16 1185.47 226.277   1
  -6  10  16 1095.48 285.510   6
  -6  10  17 6659.54 542.619   1
  -6  10  17 7148.80 685.783   6
  -6  10  18 555.002 207.142   1
  -6  11 -14 13877.5 838.809   3
  -6  11 -13 1413.74 293.775   3
  -6  11 -12 8136.40 627.178   3
  -6  11 -11 3885.52 427.044   3
  -6  11 -10 5305.62 495.231   3
  -6  11  -9 10136.1 677.244   3
  -6  11  -8 536.049 195.264   3
  -6  11  -7 13021.6 747.153   3
  -6  11  -6 183.577 134.239   3
  -6  11  -5 15504.3 801.391   3
  -6  11  -4 2566.64 335.437   3
  -6  11  -3 10965.8 664.144   3
  -6  11  -2 1797.75 296.036   3
  -6  11  -1 8828.17 596.525   3
  -6  11   0 9369.91 616.455   3
  -6  11   1-1.95251 148.990   3
  -6  11   2 7447.47 553.313   3
  -6  11   3 334.488 139.489   3
  -6  11   4 6758.65 528.447   3
  -6  11   5 204.415 139.124   3
  -6  11   6 4277.29 444.810   3
  -6  11   7 2172.60 333.291   3
  -6  11   8 10822.7 711.594   3
  -6  11   9 551.910 181.654   3
  -6  11  10 4261.84 454.809   3
  -6  11  11 2257.28 346.988   3
  -6  11  12 2569.81 308.691   1
  -6  11  12 3348.29 436.382   3
  -6  11  13 5096.19 527.579   3
  -6  11  13 4551.67 411.072   1
  -6  11  14 466.300 183.644   1
  -6  11  14 586.857 269.358   6
  -6  11  15 5365.39 466.948   1
  -6  11  15 5542.52 587.352   6
  -6  11  16 295.736 146.792   1
  -6  11  17 6341.64 550.471   1
  -6  12 -13 9021.91 681.917   3
  -6  12 -12 4789.00 501.973   3
  -6  12 -11 9225.10 679.434   3
  -6  12 -10 916.610 238.029   3
  -6  12  -9 15381.1 852.506   3
  -6  12  -8 1079.26 261.873   3
  -6  12  -7 7299.14 579.670   3
  -6  12  -6 590.307 215.765   3
  -6  12  -5 9342.63 642.842   3
  -6  12  -4 7995.71 603.202   3
  -6  12  -3 6433.35 531.592   3
  -6  12  -2 11786.9 718.289   3
  -6  12  -1 1814.75 297.891   3
  -6  12   0 12080.3 734.646   3
  -6  12   1-60.2227 159.646   3
  -6  12   2 11529.8 719.275   3
  -6  12   3 467.220 179.528   3
  -6  12   4 4047.27 447.273   3
  -6  12   5 2211.62 342.029   3
  -6  12   6 5262.09 503.875   3
  -6  12   7 5977.68 554.148   3
  -6  12   8 3696.89 433.489   3
  -6  12   9 5245.09 531.695   3
  -6  12  10 1388.43 305.845   3
  -6  12  11 6597.28 591.660   3
  -6  12  12 93.9454 170.113   3
  -6  12  14-2.15477 253.303   6
  -6  13 -11 6264.72 582.814   3
  -6  13 -10 118.514 201.692   3
  -6  13  -9 8131.70 644.199   3
  -6  13  -8 955.500 262.011   3
  -6  13  -7 17938.7 944.596   3
  -6  13  -6 960.940 252.839   3
  -6  13  -5 8423.30 635.055   3
  -6  13  -4 14834.7 840.500   3
  -6  13  -3 4157.09 458.034   3
  -6  13  -2 17882.6 926.075   3
  -6  13  -1 198.167 161.780   3
  -6  13   0 13314.2 803.821   3
  -6  13   1 543.457 194.322   3
  -6  13   2 8626.17 662.657   3
  -6  13   3 1550.53 315.853   3
  -6  13   4 3437.74 432.037   3
  -6  13   5 5732.60 555.711   3
  -6  13   6 2871.83 394.224   3
  -6  13   7 6071.70 574.835   3
  -6  13   8 11.2467 150.790   3
  -6  13   9 8019.22 676.468   3
  -6  13  10 989.337 279.326   3
  -6  13  11 8411.55 690.590   3
  -6  13  12 41.5282 141.632   3
  -6  14  -9 8149.43 674.498   3
  -6  14  -8 3010.85 407.023   3
  -6  14  -7 7997.85 649.514   3
  -6  14  -6 4708.39 506.647   3
  -6  14  -5 2162.31 336.358   3
  -6  14  -4 7845.36 644.085   3
  -6  14  -3 863.972 242.058   3
  -6  14  -2 9986.24 726.169   3
  -6  14  -1 2617.49 385.782   3
  -6  14   0 10565.4 752.111   3
  -6  14   1 639.580 218.026   3
  -6  14   2 6023.56 587.252   3
  -6  14   3 6205.29 597.217   3
  -6  14   4 2275.18 381.516   3
  -6  14   5 5236.36 553.133   3
  -6  14   6 527.052 213.813   3
  -6  14   7 9805.45 756.157   3
  -6  14   8 379.297 215.536   3
  -6  14   9 6736.93 635.439   3
  -6  14  10 496.271 244.612   3
  -6  15  -4 7413.34 658.556   3
  -6  15  -3 1163.54 304.813   3
  -6  15  -2 4475.85 515.978   3
  -6  15  -1 41.0413 173.016   3
  -6  15   0 8334.42 708.559   3
  -6  15   1 4365.24 522.673   3
  -6  15   2 6003.97 601.464   3
  -6  15   3 5905.65 613.585   3
  -6  15   4 3076.99 441.320   3
  -5 -13   2 3598.41 481.701   5
  -5 -12   0 2961.21 398.945   5
  -5 -12   1 1430.15 295.986   5
  -5 -12   2 4340.60 475.477   5
  -5 -12   3 3154.81 443.543   5
  -5 -12   4 932.425 270.187   5
  -5 -12   5 3766.71 498.815   5
  -5 -12   6-287.142 230.117   5
  -5 -12   7 5439.91 593.109   1
  -5 -12   7 5574.36 605.697   5
  -5 -12   8-170.319 197.061   1
  -5 -12   9 3668.55 544.156   1
  -5 -12  10 2248.45 383.541   1
  -5 -11  -8 3003.16 413.296   2
  -5 -11  -7-3.96980 172.405   2
  -5 -11  -6 3809.67 439.613   2
  -5 -11  -5-63.1136 172.589   2
  -5 -11  -4 2276.57 344.117   2
  -5 -11  -3 1320.04 267.908   2
  -5 -11  -2 2668.50 351.813   2
  -5 -11  -1 1613.66 323.254   5
  -5 -11  -1 1840.29 289.724   2
  -5 -11   0 1804.66 329.830   5
  -5 -11   1 4735.87 469.175   5
  -5 -11   2 3101.98 437.275   5
  -5 -11   3 6882.03 600.007   5
  -5 -11   4 113.702 197.662   5
  -5 -11   5 9264.04 708.317   5
  -5 -11   6 449.632 206.611   5
  -5 -11   7 4551.28 512.231   5
  -5 -11   7 3583.78 464.012   1
  -5 -11   8-837.506 267.769   1
  -5 -11   8-224.045 189.911   5
  -5 -11   9 3061.54 443.959   1
  -5 -11   9 3426.98 491.127   5
  -5 -11  10 3712.34 490.209   5
  -5 -11  10 2253.66 433.312   1
  -5 -11  11 1363.55 336.124   1
  -5 -11  12 4161.67 531.710   1
  -5 -11  13 131.570 194.067   1
  -5 -10  -9 807.247 256.394   2
  -5 -10  -8 2877.15 399.262   2
  -5 -10  -7-168.752 191.305   2
  -5 -10  -6 2550.04 351.428   2
  -5 -10  -5 1415.23 259.797   2
  -5 -10  -4 3001.94 369.439   2
  -5 -10  -3 1802.22 290.435   2
  -5 -10  -2 3012.84 340.602   5
  -5 -10  -2 3955.02 408.885   2
  -5 -10  -1 5218.93 458.042   2
  -5 -10  -1 5042.87 454.224   5
  -5 -10   0 1453.27 266.665   5
  -5 -10   0 1821.39 285.151   2
  -5 -10   1 8998.24 613.969   5
  -5 -10   1 8745.64 579.321   2
  -5 -10   2 1204.28 300.189   5
  -5 -10   2 1295.40 255.887   2
  -5 -10   3 11789.9 672.808   2
  -5 -10   3 11867.9 741.834   5
  -5 -10   4 1596.46 266.055   2
  -5 -10   4 1809.79 317.935   5
  -5 -10   5 5470.16 524.166   5
  -5 -10   6 307.886 220.983   5
  -5 -10   7 6896.76 611.642   5
  -5 -10   8-171.363 182.700   1
  -5 -10   8 184.761 192.501   5
  -5 -10   9 1669.24 351.604   5
  -5 -10   9 204.038 181.142   1
  -5 -10  10 6232.54 599.871   1
  -5 -10  10 6997.95 632.208   5
  -5 -10  11 1064.78 306.988   5
  -5 -10  11 781.260 264.999   1
  -5 -10  12 11308.2 831.195   5
  -5 -10  12 8093.89 725.222   1
  -5 -10  13-23.4441 233.111   5
  -5 -10  13-354.976 271.013   1
  -5 -10  14 5204.12 594.536   1
  -5 -10  15 263.814 188.656   1
  -5  -9 -11-13.7218 159.738   2
  -5  -9 -10 7063.30 620.233   2
  -5  -9  -9 1464.04 299.637   2
  -5  -9  -8 3385.06 419.666   2
  -5  -9  -7 3041.17 375.346   2
  -5  -9  -6 2853.82 360.690   2
  -5  -9  -5 7126.15 558.125   2
  -5  -9  -4 2243.18 314.441   2
  -5  -9  -3 5753.53 430.694   5
  -5  -9  -3 7243.29 533.646   2
  -5  -9  -2 437.071 176.178   5
  -5  -9  -2 627.043 213.044   2
  -5  -9  -1 2135.44 288.206   5
  -5  -9  -1 1890.02 271.518   2
  -5  -9   0 177.980 135.778   2
  -5  -9   0 130.393 165.480   5
  -5  -9   1 1248.01 237.967   2
  -5  -9   1 1257.13 242.090   5
  -5  -9   2 250.996 158.654   2
  -5  -9   2 89.2595 174.863   5
  -5  -9   3 11562.1 656.479   2
  -5  -9   3 10835.7 670.453   5
  -5  -9   4 704.332 188.849   2
  -5  -9   4 735.702 195.506   5
  -5  -9   5 4751.30 450.699   5
  -5  -9   5 5172.56 446.638   2
  -5  -9   6 1971.33 289.912   2
  -5  -9   6 2536.17 356.840   5
  -5  -9   7 5331.14 524.659   5
  -5  -9   8 2470.84 382.868   1
  -5  -9   8 3817.21 449.158   5
  -5  -9   9 234.674 175.920   5
  -5  -9   9-69.8257 160.619   1
  -5  -9  10 10685.2 751.965   1
  -5  -9  10 11491.6 774.679   5
  -5  -9  11 669.217 236.801   1
  -5  -9  11 443.512 286.058   5
  -5  -9  12 9024.81 709.957   1
  -5  -9  12 11128.9 789.432   5
  -5  -9  13-341.443 199.175   1
  -5  -9  14 2744.10 422.704   1
  -5  -9  15 1228.13 310.866   1
  -5  -9  16 947.710 261.461   1
  -5  -9  17 1803.70 336.634   1
  -5  -8 -12 5665.45 577.567   2
  -5  -8 -11 3097.99 397.333   2
  -5  -8 -10 6549.42 583.766   2
  -5  -8  -9 2088.15 342.400   2
  -5  -8  -8 2818.60 374.216   2
  -5  -8  -7 4022.72 439.008   2
  -5  -8  -6 146.310 140.043   2
  -5  -8  -5 11568.1 690.614   2
  -5  -8  -4 998.836 194.391   5
  -5  -8  -4 986.797 216.030   2
  -5  -8  -3 10369.9 644.401   2
  -5  -8  -3 9297.57 518.977   5
  -5  -8  -2 301.180 144.212   2
  -5  -8  -2 226.667 142.778   5
  -5  -8  -1 3523.03 367.981   2
  -5  -8  -1 3800.34 349.495   5
  -5  -8   0 4527.97 412.674   2
  -5  -8   0 3893.58 365.666   5
  -5  -8   1 5205.66 427.087   5
  -5  -8   1 4403.71 399.533   2
  -5  -8   2 7756.72 539.855   2
  -5  -8   2 8051.12 528.281   5
  -5  -8   3 2196.16 284.909   2
  -5  -8   3 2215.49 313.253   5
  -5  -8   4 3280.54 359.255   2
  -5  -8   4 3813.45 382.603   5
  -5  -8   5 4734.74 436.582   5
  -5  -8   5 4538.31 415.579   2
  -5  -8   6 7357.20 530.850   2
  -5  -8   6 7394.03 550.783   5
  -5  -8   7 1662.72 291.777   5
  -5  -8   7 924.496 217.263   2
  -5  -8   8 10622.2 675.103   5
  -5  -8   8 8607.83 670.155   1
  -5  -8   9 1403.82 302.595   5
  -5  -8   9 885.682 252.099   1
  -5  -8  10 3395.59 423.107   1
  -5  -8  10 4245.34 451.279   5
  -5  -8  11 1491.80 333.532   5
  -5  -8  11 1315.39 287.924   1
  -5  -8  12 7780.96 635.877   5
  -5  -8  12 6011.80 571.221   1
  -5  -8  13 1703.60 330.321   1
  -5  -8  14 2987.21 422.456   1
  -5  -8  15 5200.20 537.047   1
  -5  -8  16-86.9046 176.292   1
  -5  -8  17 2572.78 407.941   1
  -5  -8  18 536.963 237.839   1
  -5  -7 -13 458.773 242.723   2
  -5  -7 -12 11534.5 807.820   2
  -5  -7 -11 3365.40 432.063   2
  -5  -7 -10 2336.74 379.570   2
  -5  -7  -9 5487.20 521.178   2
  -5  -7  -8 632.071 202.360   2
  -5  -7  -7 8052.88 598.476   2
  -5  -7  -6 351.952 155.434   2
  -5  -7  -5 23969.7 1007.00   2
  -5  -7  -4 119.887 118.205   5
  -5  -7  -4-29.2660 125.110   2
  -5  -7  -3 5915.29 379.064   5
  -5  -7  -3 5716.25 475.469   2
  -5  -7  -2 5590.79 380.793   5
  -5  -7  -2 5978.51 497.987   2
  -5  -7  -1 5735.85 399.008   5
  -5  -7  -1 5208.13 452.000   2
  -5  -7   0 11224.8 559.072   5
  -5  -7   0 12235.4 675.550   2
  -5  -7   1 5582.39 409.783   5
  -5  -7   1 4848.72 427.221   2
  -5  -7   2 7482.61 527.993   2
  -5  -7   2 7441.06 475.852   5
  -5  -7   3 1523.95 256.948   2
  -5  -7   3 1373.70 230.374   5
  -5  -7   4 7431.25 528.624   2
  -5  -7   4 7904.89 504.061   5
  -5  -7   5 72.4317 121.651   2
  -5  -7   5 305.278 175.827   5
  -5  -7   6 10213.5 596.887   5
  -5  -7   6 9125.85 586.564   2
  -5  -7   7 298.453 153.834   2
  -5  -7   7 500.047 188.809   5
  -5  -7   8 7793.11 537.832   5
  -5  -7   8 5671.30 520.138   1
  -5  -7   9 543.503 218.749   5
  -5  -7   9 524.933 181.075   1
  -5  -7  10 2819.00 366.906   1
  -5  -7  10 3094.35 381.613   5
  -5  -7  11 1319.29 269.313   5
  -5  -7  11 786.290 219.998   1
  -5  -7  12 5739.02 534.771   1
  -5  -7  13 2924.03 400.324   1
  -5  -7  14 3915.20 464.821   1
  -5  -7  15 8098.17 652.449   1
  -5  -7  16-100.017 176.105   1
  -5  -7  17 6828.00 616.705   1
  -5  -7  18-245.064 167.036   1
  -5  -7  19 3960.45 485.913   1
  -5  -6 -14 13168.5 883.339   2
  -5  -6 -13 6161.23 598.096   2
  -5  -6 -12 2682.25 389.192   2
  -5  -6 -11 8673.96 681.059   2
  -5  -6 -10 1911.75 316.648   2
  -5  -6  -9 11634.3 751.090   2
  -5  -6  -8 16.8433 139.533   2
  -5  -6  -7 20292.4 953.617   2
  -5  -6  -6 1511.74 290.796   2
  -5  -6  -5 6695.33 344.670   5
  -5  -6  -5 7882.29 571.745   2
  -5  -6  -4 11768.5 689.013   2
  -5  -6  -4 10677.5 451.532   5
  -5  -6  -3 15875.4 575.716   5
  -5  -6  -3 17367.8 828.195   2
  -5  -6  -2 14699.2 753.562   2
  -5  -6  -2 13997.1 553.652   5
  -5  -6  -1 2159.31 312.854   2
  -5  -6  -1 2406.40 246.740   5
  -5  -6   0 8843.89 459.662   5
  -5  -6   0 8957.13 579.557   2
  -5  -6   1 1059.29 200.910   2
  -5  -6   1 1227.13 204.557   5
  -5  -6   2 10476.3 615.562   2
  -5  -6   2 11064.3 539.296   5
  -5  -6   3 232.208 132.046   2
  -5  -6   3 210.715 138.826   5
  -5  -6   4 13514.7 624.114   5
  -5  -6   4 12085.9 667.518   2
  -5  -6   5 3206.94 324.150   5
  -5  -6   5 2745.92 323.236   2
  -5  -6   6 16145.0 714.021   5
  -5  -6   6 14449.5 726.393   2
  -5  -6   7 3351.84 354.187   5
  -5  -6   7 2903.95 336.606   2
  -5  -6   8 10679.0 607.148   5
  -5  -6   8 9742.36 636.762   1
  -5  -6   9 5015.69 437.352   5
  -5  -6   9 4639.14 460.229   1
  -5  -6  10 3589.87 384.192   1
  -5  -6  11 3369.14 388.616   1
  -5  -6  12 1733.15 294.477   1
  -5  -6  13 7773.55 596.616   1
  -5  -6  14 395.621 173.839   1
  -5  -6  15 7740.42 613.361   1
  -5  -6  16 774.493 227.208   1
  -5  -6  17 8910.26 672.552   1
  -5  -6  18 901.163 259.938   1
  -5  -6  19 3038.01 430.955   1
  -5  -6  20 2573.42 404.721   1
  -5  -5 -15 2658.13 408.640   2
  -5  -5 -14 6644.01 643.567   2
  -5  -5 -13 4552.15 509.997   2
  -5  -5 -12 2536.65 417.324   2
  -5  -5 -11 12797.3 822.239   2
  -5  -5 -10 780.745 245.260   2
  -5  -5  -9 20991.3 1008.48   2
  -5  -5  -8 216.532 140.301   2
  -5  -5  -7 18969.7 917.684   2
  -5  -5  -6 2745.00 368.923   2
  -5  -5  -5 9258.10 624.174   2
  -5  -5  -5 7249.41 320.664   5
  -5  -5  -4 14670.9 770.296   2
  -5  -5  -4 13755.5 462.703   5
  -5  -5  -3 10432.6 422.838   5
  -5  -5  -3 10686.8 651.680   2
  -5  -5  -2 16087.6 791.823   2
  -5  -5  -2 15604.9 537.239   5
  -5  -5  -1 673.546 203.327   2
  -5  -5  -1 744.157 150.515   5
  -5  -5   0 23668.9 939.055   2
  -5  -5   0 22906.8 705.074   5
  -5  -5   1-50.4475 148.528   2
  -5  -5   1 243.679 126.551   5
  -5  -5   2 23228.4 750.176   5
  -5  -5   2 22029.4 897.824   2
  -5  -5   3 271.982 144.039   5
  -5  -5   3 98.8313 124.205   2
  -5  -5   4 8821.99 475.931   5
  -5  -5   4 7539.45 519.776   2
  -5  -5   5 10949.6 545.285   5
  -5  -5   5 9050.41 563.183   2
  -5  -5   6 9147.33 568.321   2
  -5  -5   6 10472.7 543.093   5
  -5  -5   7 9771.52 537.280   5
  -5  -5   7 9094.37 558.832   2
  -5  -5   8 2280.94 292.492   1
  -5  -5   9 7015.89 518.583   1
  -5  -5  10 3397.77 370.840   1
  -5  -5  11 6786.89 520.842   1
  -5  -5  12 1226.48 241.406   1
  -5  -5  13 5607.57 493.134   1
  -5  -5  14 43.8259 142.543   1
  -5  -5  15 9361.72 651.124   1
  -5  -5  16 530.579 205.392   1
  -5  -5  17 4574.66 481.904   1
  -5  -5  18 2246.29 365.079   1
  -5  -5  19 2225.56 357.998   1
  -5  -5  20 1739.35 342.926   1
  -5  -4 -16 2106.22 463.964   2
  -5  -4 -15 2746.06 434.067   2
  -5  -4 -14 1680.95 324.722   2
  -5  -4 -13 5171.21 557.755   2
  -5  -4 -12 348.035 219.463   2
  -5  -4 -11 18768.3 997.566   2
  -5  -4 -10 81.0082 163.686   2
  -5  -4  -9 23283.1 1062.39   2
  -5  -4  -8 722.578 213.951   2
  -5  -4  -7 14569.6 804.088   2
  -5  -4  -6 13534.8 756.766   2
  -5  -4  -5 5195.10 463.653   2
  -5  -4  -4 18300.8 854.396   2
  -5  -4  -4 17843.5 486.825   5
  -5  -4  -3 449.713 107.534   5
  -5  -4  -3 243.110 172.441   2
  -5  -4  -2 25915.2 656.948   5
  -5  -4  -2 24084.9 965.436   2
  -5  -4  -1 3352.53 246.003   5
  -5  -4  -1 3400.58 362.835   2
  -5  -4   0 14432.0 519.539   5
  -5  -4   0 13206.6 692.868   2
  -5  -4   1 370.818 134.798   5
  -5  -4   1 288.107 123.538   2
  -5  -4   2 18046.9 617.204   5
  -5  -4   2 16445.8 759.509   2
  -5  -4   3 9370.52 454.578   5
  -5  -4   3 8728.28 542.126   2
  -5  -4   4 4675.21 389.970   2
  -5  -4   4 5079.67 347.694   5
  -5  -4   5 19031.7 801.503   2
  -5  -4   6 1386.67 230.010   2
  -5  -4   7 11022.1 603.503   2
  -5  -4   8 176.258 119.978   1
  -5  -4   9 25112.5 948.160   1
  -5  -4   9 21050.2 401.793   3
  -5  -4  10 583.472 192.526   1
  -5  -4  11 3902.00 391.278   1
  -5  -4  12 754.268 195.500   1
  -5  -4  13 5267.17 456.170   1
  -5  -4  14 3618.96 398.361   1
  -5  -4  15 3225.40 378.803   1
  -5  -4  16 2221.56 324.413   1
  -5  -4  17 1454.78 258.064   1
  -5  -4  18 2872.84 372.745   1
  -5  -4  19 830.584 231.166   1
  -5  -4  20 3769.98 453.649   1
  -5  -4  21 158.947 167.167   1
  -5  -3 -17 3835.02 535.796   2
  -5  -3 -16 363.910 249.965   2
  -5  -3 -15 9364.15 768.856   2
  -5  -3 -14 666.067 292.163   2
  -5  -3 -13 10834.2 782.089   2
  -5  -3 -12-36.3992 180.001   2
  -5  -3 -11 12051.5 791.235   2
  -5  -3 -10 6350.31 565.289   2
  -5  -3  -9 20386.2 982.640   2
  -5  -3  -8 15023.9 825.182   2
  -5  -3  -7 546.495 187.570   2
  -5  -3  -6 2545.17 334.703   2
  -5  -3  -5 9471.92 612.389   2
  -5  -3  -4 19040.9 867.313   2
  -5  -3  -3 101.269 122.750   2
  -5  -3  -2 27313.1 1011.71   2
  -5  -3  -1 8727.98 558.261   2
  -5  -3   0 33384.9 1097.97   2
  -5  -3   1 13798.8 684.001   2
  -5  -3   2 9662.89 556.981   2
  -5  -3   3 26760.2 942.292   2
  -5  -3   4 4524.36 384.414   2
  -5  -3   5 18444.3 768.505   2
  -5  -3   6 180.770 110.373   2
  -5  -3   6 244.288 64.0003   6
  -5  -3   7 21329.7 831.132   1
  -5  -3   7 21440.7 541.029   6
  -5  -3   7 20845.5 821.303   2
  -5  -3   8 653.518 98.1018   6
  -5  -3   8 616.269 151.655   1
  -5  -3   8 615.186 84.6901   3
  -5  -3   9 18025.5 768.961   1
  -5  -3   9 16214.9 353.499   3
  -5  -3  10 2935.92 320.573   1
  -5  -3  11 8870.74 560.111   1
  -5  -3  12 7048.48 507.302   1
  -5  -3  13 3753.31 377.974   1
  -5  -3  14 9251.97 603.024   1
  -5  -3  15 2100.74 297.549   1
  -5  -3  16 3714.48 399.520   1
  -5  -3  17 142.309 141.023   1
  -5  -3  18 4162.48 442.842   1
  -5  -3  19 317.088 188.076   1
  -5  -3  20 3498.24 424.542   1
  -5  -3  21-211.192 171.365   1
  -5  -2 -17 8519.30 758.019   2
  -5  -2 -16 384.010 281.340   2
  -5  -2 -15 12501.2 875.134   2
  -5  -2 -14 897.976 277.520   2
  -5  -2 -13 3972.93 479.070   2
  -5  -2 -12 2395.36 357.670   2
  -5  -2 -11 3676.19 443.318   2
  -5  -2 -10 8893.23 656.744   2
  -5  -2  -9 4118.49 449.982   2
  -5  -2  -8 11811.5 718.893   2
  -5  -2  -7 2165.72 314.009   2
  -5  -2  -6 15277.9 777.310   2
  -5  -2  -5 3665.89 369.120   2
  -5  -2  -4 16857.6 786.502   2
  -5  -2  -3 6133.50 461.183   2
  -5  -2  -2 35234.2 1126.57   2
  -5  -2  -1 16316.5 739.823   2
  -5  -2   0 24078.8 894.132   2
  -5  -2   1 33430.7 1050.78   2
  -5  -2   2 2884.13 291.623   2
  -5  -2   3 27305.8 926.392   2
  -5  -2   4-27.2426 129.408   2
  -5  -2   5 33789.5 1029.24   2
  -5  -2   6 10026.1 542.209   2
  -5  -2   7 18113.9 731.156   1
  -5  -2   7 18734.3 513.888   6
  -5  -2   7 17407.1 460.093   3
  -5  -2   7 18592.4 757.241   2
  -5  -2   8 13082.7 622.844   1
  -5  -2   8 13433.7 419.647   6
  -5  -2   8 12268.8 357.662   3
  -5  -2   9 8253.85 501.115   1
  -5  -2   9 7197.46 243.077   3
  -5  -2   9 7902.60 308.515   6
  -5  -2  10 12748.2 269.227   3
  -5  -2  10 15112.5 691.087   1
  -5  -2  11 8719.74 538.381   1
  -5  -2  12 5303.00 418.874   1
  -5  -2  13 2653.23 194.553   6
  -5  -2  13 3185.24 342.604   1
  -5  -2  14 17201.8 804.579   1
  -5  -2  15 51.9569 129.465   1
  -5  -2  16 7795.58 557.782   1
  -5  -2  17 66.5174 120.361   1
  -5  -2  18 1860.95 297.426   1
  -5  -2  19 2957.29 403.275   1
  -5  -2  20 5071.51 502.814   1
  -5  -2  21 2657.40 370.128   1
  -5  -1 -18 1234.52 314.635   2
  -5  -1 -17 6268.25 654.236   2
  -5  -1 -16 2079.79 404.149   2
  -5  -1 -15 5600.17 593.313   2
  -5  -1 -14 1634.33 321.918   2
  -5  -1 -13 3842.20 467.492   2
  -5  -1 -12 7949.16 634.887   2
  -5  -1 -11 5624.43 526.101   2
  -5  -1 -10 20373.6 972.575   2
  -5  -1  -9 577.558 203.485   2
  -5  -1  -8 30858.1 1151.07   2
  -5  -1  -7 190.695 143.102   2
  -5  -1  -6 23407.9 951.153   2
  -5  -1  -5 735.542 159.933   2
  -5  -1  -4 28277.0 1003.63   2
  -5  -1  -3 10391.9 580.875   2
  -5  -1  -2 18886.4 771.981   2
  -5  -1  -1 18552.8 758.706   2
  -5  -1   0 4143.23 355.262   2
  -5  -1   1 25741.8 875.141   2
  -5  -1   2 2379.62 242.746   2
  -5  -1   3 54542.3 1318.54   2
  -5  -1   4 551.783 128.616   2
  -5  -1   5 42814.3 1146.50   2
  -5  -1   6 735.455 117.950   3
  -5  -1   6 762.736 179.365   1
  -5  -1   6 661.116 194.142   2
  -5  -1   7 59660.6 1001.70   3
  -5  -1   7 62760.1 1394.20   1
  -5  -1   8 45289.2 807.729   3
  -5  -1   8 48867.6 1218.78   1
  -5  -1   9 3500.38 324.361   1
  -5  -1   9 3231.56 176.978   3
  -5  -1  10 30123.2 967.731   1
  -5  -1  10 26424.6 532.140   3
  -5  -1  11 1560.76 237.588   1
  -5  -1  12 22464.0 869.439   1
  -5  -1  13 314.208 133.812   1
  -5  -1  14 13007.6 680.174   1
  -5  -1  14 12294.8 488.302   6
  -5  -1  15 332.553 167.712   1
  -5  -1  16 7236.71 530.870   1
  -5  -1  17 1446.36 272.800   1
  -5  -1  18 1341.34 238.025   1
  -5  -1  19 7274.31 579.362   1
  -5  -1  20 6804.62 578.985   1
  -5  -1  21 3391.87 415.080   1
  -5  -1  22 1435.71 293.412   1
  -5   0 -19 3470.84 507.761   2
  -5   0 -18 2681.32 462.387   2
  -5   0 -17 9065.77 772.384   2
  -5   0 -16 6796.32 649.924   2
  -5   0 -15 1724.48 341.758   2
  -5   0 -14 10384.0 756.992   2
  -5   0 -13 755.286 276.850   2
  -5   0 -12 8725.69 650.793   2
  -5   0 -11 111.778 170.154   2
  -5   0 -10 12299.2 733.938   2
  -5   0  -9 887.241 243.441   2
  -5   0  -8 19248.0 870.586   2
  -5   0  -7 866.496 210.347   2
  -5   0  -6 19751.0 828.367   2
  -5   0  -5 5768.82 438.193   2
  -5   0  -4 18769.1 774.882   2
  -5   0  -3 9283.14 518.618   2
  -5   0  -2 2145.02 253.986   2
  -5   0  -1 26701.8 874.559   2
  -5   0   0 5041.55 363.372   2
  -5   0   1 40345.7 1076.63   2
  -5   0   2 464.741 120.785   2
  -5   0   3 33922.8 979.701   2
  -5   0   4 5251.10 374.187   2
  -5   0   5 59659.8 1347.60   2
  -5   0   5 56448.1 1035.63   3
  -5   0   6 10549.2 509.083   1
  -5   0   6 10436.6 537.267   2
  -5   0   6 9972.24 372.212   3
  -5   0   7 10499.2 514.617   1
  -5   0   7 9286.11 346.159   3
  -5   0   8 32342.1 685.772   3
  -5   0   8 34725.4 988.092   1
  -5   0   9 550.213 95.8293   3
  -5   0   9 630.260 156.402   1
  -5   0  10 23756.0 569.200   3
  -5   0  10 26675.6 895.366   1
  -5   0  11 147.948 56.7509   3
  -5   0  11 199.951 126.493   1
  -5   0  12 25230.0 902.630   1
  -5   0  13 2457.14 298.854   1
  -5   0  14 14183.7 703.490   1
  -5   0  15 3644.50 298.949   6
  -5   0  15 3961.73 381.960   1
  -5   0  16 4737.14 342.717   6
  -5   0  16 4998.21 437.678   1
  -5   0  17 11422.1 682.066   1
  -5   0  18 2448.96 334.268   1
  -5   0  19 1697.37 285.550   1
  -5   0  20 828.119 230.263   1
  -5   0  21 2389.10 369.488   1
  -5   0  22-356.370 189.545   1
  -5   1 -19 4859.58 592.397   2
  -5   1 -18 5792.70 622.021   2
  -5   1 -17 2491.76 409.490   2
  -5   1 -16 8773.28 716.256   2
  -5   1 -15 232.458 186.489   2
  -5   1 -14 17961.3 958.561   2
  -5   1 -13 1424.17 291.887   2
  -5   1 -12 17379.6 886.743   2
  -5   1 -11 368.148 174.549   2
  -5   1 -10 3627.89 388.921   2
  -5   1  -9 2525.30 320.252   2
  -5   1  -8 4565.77 412.977   2
  -5   1  -7 17672.2 771.133   2
  -5   1  -6 8565.03 518.229   2
  -5   1  -5 22252.1 822.865   2
  -5   1  -4 9171.01 507.865   2
  -5   1  -3 18403.6 709.454   2
  -5   1  -2 10105.2 507.906   2
  -5   1  -1 31875.7 921.948   2
  -5   1   0 8.40702 101.424   2
  -5   1   1 23634.9 775.684   2
  -5   1   2 16044.4 631.266   2
  -5   1   3 9319.24 479.146   2
  -5   1   4 32502.3 938.139   2
  -5   1   4 33180.6 773.236   3
  -5   1   5 36530.5 945.933   1
  -5   1   5 36074.7 998.538   2
  -5   1   5 35886.9 796.362   3
  -5   1   6 11398.8 513.580   1
  -5   1   6 10804.2 400.113   3
  -5   1   7 475.211 141.078   1
  -5   1   7 309.140 52.6836   3
  -5   1   8 36933.1 1002.74   1
  -5   1   8 34227.5 748.609   3
  -5   1   9 3503.21 308.942   1
  -5   1   9 3178.02 210.669   3
  -5   1  10 34972.0 783.935   3
  -5   1  10 36363.5 1038.98   1
  -5   1  11 1354.32 215.173   1
  -5   1  11 1416.37 153.235   3
  -5   1  12 24463.0 615.206   3
  -5   1  12 24762.4 882.318   1
  -5   1  13 4992.36 405.942   1
  -5   1  14 12855.3 660.445   1
  -5   1  15 11542.2 582.653   6
  -5   1  15 10894.4 619.365   1
  -5   1  16 4572.92 413.999   1
  -5   1  16 4845.77 374.933   6
  -5   1  17 13938.5 630.517   6
  -5   1  17 14884.9 771.880   1
  -5   1  18 281.370 154.178   1
  -5   1  19 10178.5 670.030   1
  -5   1  20 2479.17 360.629   1
  -5   1  21 1700.99 313.470   1
  -5   1  22 133.841 159.309   1
  -5   2 -19 2341.74 388.753   2
  -5   2 -18 6789.86 639.622   2
  -5   2 -17-80.8095 169.654   2
  -5   2 -16 11407.5 772.098   2
  -5   2 -15-45.7785 184.455   2
  -5   2 -14 13083.6 780.712   2
  -5   2 -13 3846.45 415.129   2
  -5   2 -12 13272.6 736.978   2
  -5   2 -11 5103.86 458.933   2
  -5   2 -10 8557.14 565.947   2
  -5   2  -9 19198.0 822.517   2
  -5   2  -8 1946.84 286.775   2
  -5   2  -7 19711.8 778.481   2
  -5   2  -6 3487.17 317.346   2
  -5   2  -5 21731.4 775.584   2
  -5   2  -4 590.192 147.373   2
  -5   2  -3 7690.69 431.297   2
  -5   2  -2 900.313 164.001   2
  -5   2  -1 17367.2 640.821   2
  -5   2   0 1060.97 160.958   2
  -5   2   1 15123.3 592.887   2
  -5   2   2 17004.1 634.325   2
  -5   2   2 17176.3 570.069   3
  -5   2   3 16429.2 544.665   3
  -5   2   3 16406.0 629.152   2
  -5   2   4 24312.2 722.325   1
  -5   2   4 23735.3 775.782   2
  -5   2   4 24056.5 660.927   3
  -5   2   5 965.898 148.492   1
  -5   2   5 698.260 104.541   3
  -5   2   5 796.492 141.422   2
  -5   2   6 34255.8 790.327   3
  -5   2   6 34971.0 919.255   1
  -5   2   7 13.8989 91.7053   1
  -5   2   7 173.022 86.4206   3
  -5   2   8 38431.9 1012.77   1
  -5   2   8 36074.9 819.512   3
  -5   2   9 3568.94 310.806   1
  -5   2   9 3302.58 238.908   3
  -5   2  10 34335.6 992.421   1
  -5   2  10 34589.2 836.694   3
  -5   2  11 3879.27 336.506   1
  -5   2  11 3479.91 261.093   3
  -5   2  12 8498.78 401.599   3
  -5   2  12 9573.76 533.792   1
  -5   2  13 21453.8 834.633   1
  -5   2  14 2293.87 289.902   1
  -5   2  15 17107.0 763.234   6
  -5   2  15 17640.5 791.376   1
  -5   2  16 162.324 115.010   1
  -5   2  16 113.416 112.220   6
  -5   2  17 17510.0 776.794   6
  -5   2  17 17755.7 838.278   1
  -5   2  18 1256.78 249.897   1
  -5   2  18 1693.54 258.287   6
  -5   2  19 5095.70 472.695   1
  -5   2  20 597.039 203.399   1
  -5   2  21 3258.47 418.591   1
  -5   2  22 1865.08 337.524   1
  -5   3 -20 5526.16 603.208   2
  -5   3 -19 644.756 235.950   2
  -5   3 -18 9627.84 731.357   2
  -5   3 -17 1350.80 296.528   2
  -5   3 -16 10007.3 691.541   2
  -5   3 -15 9589.27 651.796   2
  -5   3 -14 10508.9 674.497   2
  -5   3 -13 17102.4 831.213   2
  -5   3 -12 3895.28 387.223   2
  -5   3 -11 14180.3 705.034   2
  -5   3 -10 12118.8 631.217   2
  -5   3  -9 12345.6 622.219   2
  -5   3  -8 4411.68 357.059   2
  -5   3  -7 28106.4 890.169   2
  -5   3  -6 1389.39 206.848   2
  -5   3  -5 21530.2 735.723   2
  -5   3  -4 1225.82 179.940   2
  -5   3  -3 12577.6 532.364   2
  -5   3  -2 10830.5 485.012   2
  -5   3  -1 14265.6 563.202   2
  -5   3   0 13045.6 521.451   3
  -5   3   0 12994.1 536.248   2
  -5   3   1 8301.16 405.293   3
  -5   3   1 8813.72 442.676   2
  -5   3   2 23413.7 690.943   3
  -5   3   2 22775.4 729.718   2
  -5   3   3 310.837 99.9153   1
  -5   3   3 406.259 90.0822   3
  -5   3   3 248.205 113.867   2
  -5   3   4 34003.6 927.764   2
  -5   3   4 33573.4 827.898   3
  -5   3   4 34494.3 856.012   1
  -5   3   5 831.199 126.288   3
  -5   3   5 739.961 132.593   1
  -5   3   6 26544.6 779.287   1
  -5   3   6 26725.7 716.346   3
  -5   3   7 3091.45 261.189   1
  -5   3   7 3302.70 242.992   3
  -5   3   8 25797.9 716.535   3
  -5   3   8 28215.2 837.684   1
  -5   3   9 8287.42 403.492   3
  -5   3   9 7663.91 438.993   1
  -5   3  10 18283.4 630.838   3
  -5   3  10 18655.6 703.347   1
  -5   3  11 35211.0 1017.73   1
  -5   3  11 33304.2 902.603   3
  -5   3  12 2394.77 267.218   1
  -5   3  12 1881.26 213.769   3
  -5   3  13 21113.0 709.768   3
  -5   3  13 22395.6 842.412   1
  -5   3  14 308.084 135.052   1
  -5   3  15 18260.9 830.530   6
  -5   3  15 18945.2 814.984   1
  -5   3  16 153.534 119.374   6
  -5   3  16 549.215 179.498   1
  -5   3  17 19089.3 862.540   6
  -5   3  17 19836.6 884.742   1
  -5   3  18 5061.89 457.731   6
  -5   3  18 4494.67 436.990   1
  -5   3  19 8052.33 565.942   6
  -5   3  19 7445.26 580.209   1
  -5   3  20 5599.48 516.968   1
  -5   3  20 4766.66 439.283   6
  -5   3  21 1933.41 340.712   1
  -5   3  22 4576.22 502.523   1
  -5   4 -20 8838.32 707.073   2
  -5   4 -19 1370.66 286.892   2
  -5   4 -18 6069.45 547.144   2
  -5   4 -17 417.127 199.499   2
  -5   4 -16 10928.0 696.662   2
  -5   4 -15 7278.98 553.086   2
  -5   4 -14 5250.47 467.043   2
  -5   4 -13 13540.3 704.544   2
  -5   4 -12 6416.85 460.613   2
  -5   4 -11 32127.6 1034.23   2
  -5   4 -10 462.526 161.927   2
  -5   4  -9 38083.5 1069.45   2
  -5   4  -8 4171.61 336.318   2
  -5   4  -7 24680.5 793.144   2
  -5   4  -6 5077.69 345.554   2
  -5   4  -5 15419.9 590.113   2
  -5   4  -4 6686.44 379.961   2
  -5   4  -3 4340.45 307.344   2
  -5   4  -2 37599.1 934.917   2
  -5   4  -2 38910.0 987.888   3
  -5   4  -1 14095.8 557.766   3
  -5   4  -1 13320.3 532.742   2
  -5   4   0 19090.6 645.411   2
  -5   4   0 20326.1 673.080   3
  -5   4   1 848.302 152.006   3
  -5   4   1 1106.19 160.669   2
  -5   4   1 1008.83 139.649   1
  -5   4   2 21520.1 613.227   1
  -5   4   2 20735.0 664.541   3
  -5   4   2 21094.4 692.937   2
  -5   4   3 142.589 97.5691   2
  -5   4   3 242.074 78.7744   1
  -5   4   3 144.490 90.3431   3
  -5   4   4 14258.0 511.049   1
  -5   4   4 13747.8 524.288   3
  -5   4   5 270.449 88.4631   1
  -5   4   5 222.212 89.7751   3
  -5   4   6 29469.8 796.861   3
  -5   4   6 29737.5 806.268   1
  -5   4   7 12487.4 504.101   3
  -5   4   7 12000.3 506.259   1
  -5   4   8 16824.0 603.257   3
  -5   4   8 16937.6 622.624   1
  -5   4   9 12208.7 541.764   1
  -5   4   9 11917.2 519.943   3
  -5   4  10 13213.5 568.001   3
  -5   4  10 13160.1 583.316   1
  -5   4  11 36885.7 1009.15   3
  -5   4  11 36851.7 1039.80   1
  -5   4  12 591.522 155.048   3
  -5   4  12 928.714 184.203   1
  -5   4  13 21724.2 773.668   3
  -5   4  13 22984.8 847.614   1
  -5   4  14 141.505 138.897   1
  -5   4  15 17958.3 790.697   1
  -5   4  15 17639.5 849.912   6
  -5   4  16 4036.76 386.869   1
  -5   4  16 4190.03 416.267   6
  -5   4  17 12317.9 725.792   6
  -5   4  17 12114.1 691.504   1
  -5   4  18 7886.40 583.372   1
  -5   4  18 8083.69 604.005   6
  -5   4  19 11046.0 695.343   1
  -5   4  19 10911.5 693.853   6
  -5   4  20 6251.93 548.394   1
  -5   4  20 7328.49 578.215   6
  -5   4  21 1079.85 263.652   1
  -5   4  21 1253.70 283.773   6
  -5   5 -19 368.649 208.464   2
  -5   5 -18 10576.0 695.361   2
  -5   5 -17 6218.08 517.066   2
  -5   5 -16 10002.0 637.012   2
  -5   5 -15 13267.7 704.525   2
  -5   5 -14 697.442 184.239   2
  -5   5 -13 22008.8 858.759   2
  -5   5 -12 164.116 127.837   2
  -5   5 -11 26551.7 896.614   2
  -5   5 -10 1711.05 220.376   2
  -5   5  -9 16743.0 657.270   2
  -5   5  -8 6499.66 397.073   2
  -5   5  -7 18275.0 650.702   2
  -5   5  -6 14010.2 556.303   2
  -5   5  -5 2590.12 262.931   3
  -5   5  -5 2535.37 230.821   2
  -5   5  -4 25373.2 746.650   2
  -5   5  -4 26960.2 838.922   3
  -5   5  -3 2803.64 269.290   3
  -5   5  -3 2552.67 229.801   2
  -5   5  -2 23959.0 718.034   2
  -5   5  -2 24927.7 789.042   3
  -5   5  -1 374.072 129.504   3
  -5   5  -1 529.099 128.849   2
  -5   5   0 21449.7 713.412   3
  -5   5   0 22553.4 700.756   2
  -5   5   0 22381.8 578.983   1
  -5   5   1 92.6468 58.2379   1
  -5   5   1 7.73859 83.9257   2
  -5   5   1 102.754 84.5932   3
  -5   5   2 24868.0 758.587   3
  -5   5   2 24495.3 635.537   1
  -5   5   2 25017.9 751.465   2
  -5   5   3 2737.51 211.698   1
  -5   5   3 2794.00 251.409   3
  -5   5   4 2962.05 226.492   1
  -5   5   4 3246.56 267.008   3
  -5   5   5 3731.88 259.147   1
  -5   5   5 3625.72 284.275   3
  -5   5   6 12860.1 497.955   1
  -5   5   6 12363.7 527.212   3
  -5   5   7 14175.3 540.892   1
  -5   5   7 13909.8 566.769   3
  -5   5   8 5185.54 335.764   1
  -5   5   8 5181.12 349.043   3
  -5   5   9 23072.4 749.079   1
  -5   5   9 23676.3 788.072   3
  -5   5  10 61.7897 79.1993   3
  -5   5  10 41.5631 98.3481   1
  -5   5  11 23425.5 804.036   1
  -5   5  11 22332.3 813.624   3
  -5   5  12 214.762 125.686   1
  -5   5  12 295.872 132.838   3
  -5   5  13 16816.3 714.814   1
  -5   5  13 15691.3 691.815   3
  -5   5  14 2758.57 307.721   1
  -5   5  15 15734.5 829.635   6
  -5   5  15 14815.3 714.777   1
  -5   5  16 6718.05 558.020   6
  -5   5  16 6233.67 479.734   1
  -5   5  17 6417.06 513.388   1
  -5   5  17 6351.34 551.704   6
  -5   5  18 7140.91 555.268   1
  -5   5  18 8140.68 624.736   6
  -5   5  19 1502.27 309.391   6
  -5   5  19 1585.19 300.436   1
  -5   5  20 7393.12 593.623   1
  -5   5  20 6651.43 574.699   6
  -5   5  21-161.443 169.324   1
  -5   5  21 501.725 215.380   6
  -5   6 -19 2386.37 343.139   3
  -5   6 -18 4572.49 455.580   3
  -5   6 -17 7462.92 568.628   3
  -5   6 -17 7346.61 534.898   2
  -5   6 -16 10740.1 662.508   3
  -5   6 -16 9653.64 592.345   2
  -5   6 -15 11322.4 663.155   3
  -5   6 -15 10682.6 603.966   2
  -5   6 -14 745.983 207.959   2
  -5   6 -14 152.900 111.386   3
  -5   6 -13 17684.2 799.891   3
  -5   6 -13 17988.9 738.287   2
  -5   6 -12 2681.34 279.453   2
  -5   6 -12 2342.13 292.137   3
  -5   6 -11 15140.2 638.626   2
  -5   6 -11 15229.4 707.807   3
  -5   6 -10 11496.2 600.926   3
  -5   6 -10 11207.6 530.354   2
  -5   6  -9 11591.6 594.453   3
  -5   6  -9 12222.0 537.321   2
  -5   6  -8 15937.3 602.429   2
  -5   6  -8 16361.6 696.047   3
  -5   6  -7 8892.11 503.876   3
  -5   6  -7 9268.13 446.635   2
  -5   6  -6 15887.1 581.399   2
  -5   6  -6 16242.5 673.352   3
  -5   6  -5 7750.37 293.776   1
  -5   6  -5 8539.97 414.338   2
  -5   6  -5 8330.61 469.557   3
  -5   6  -4 39921.8 1068.86   3
  -5   6  -4 39548.6 945.843   2
  -5   6  -3 49.4426 82.4822   2
  -5   6  -3 42.9729 82.0416   3
  -5   6  -2 25417.5 734.504   2
  -5   6  -2 23687.7 544.643   1
  -5   6  -2 24843.3 804.640   3
  -5   6  -1 3499.58 300.704   3
  -5   6  -1 3611.30 277.394   2
  -5   6  -1 3371.15 194.826   1
  -5   6   0 35193.7 705.211   1
  -5   6   0 34772.5 953.743   3
  -5   6   0 36296.7 901.293   2
  -5   6   1 15727.0 456.295   1
  -5   6   1 15645.6 573.280   2
  -5   6   1 16281.9 628.526   3
  -5   6   2 5116.35 255.480   1
  -5   6   2 5164.16 354.831   3
  -5   6   3 9450.18 370.777   1
  -5   6   3 9560.41 475.198   3
  -5   6   4 3274.37 281.043   3
  -5   6   4 3084.13 218.622   1
  -5   6   5 6158.93 383.836   3
  -5   6   5 6843.62 336.279   1
  -5   6   6 66.8343 71.4466   1
  -5   6   6 210.719 118.097   3
  -5   6   7 20828.1 745.421   3
  -5   6   7 21193.2 662.634   1
  -5   6   8 128.674 103.902   1
  -5   6   8 78.6154 85.8174   3
  -5   6   9 19203.3 670.488   1
  -5   6   9 18824.8 739.113   3
  -5   6  10 116.921 93.5290   3
  -5   6  10 81.6775 108.441   1
  -5   6  11 12517.0 628.809   3
  -5   6  11 12611.7 574.774   1
  -5   6  12 975.001 174.117   1
  -5   6  12 1106.79 205.388   3
  -5   6  13 12143.4 604.421   1
  -5   6  13 11516.3 624.400   3
  -5   6  14 3769.60 346.006   1
  -5   6  15 10712.7 611.561   1
  -5   6  15 10857.0 701.486   6
  -5   6  16 8955.43 657.374   6
  -5   6  16 8204.81 556.651   1
  -5   6  17 2174.56 305.649   1
  -5   6  17 2145.39 335.813   6
  -5   6  18 15059.3 800.007   1
  -5   6  18 15479.9 897.509   6
  -5   6  19 319.020 167.560   1
  -5   6  19 532.124 200.442   6
  -5   6  20 8647.54 643.881   1
  -5   6  20 8478.23 684.691   6
  -5   6  21 865.778 266.543   6
  -5   6  21 949.441 245.539   1
  -5   6  22 8036.77 704.601   6
  -5   7 -19 2934.79 384.878   3
  -5   7 -18 463.121 182.366   3
  -5   7 -17 3887.88 412.837   3
  -5   7 -16 580.959 197.928   3
  -5   7 -15 10666.3 647.166   3
  -5   7 -14 825.416 198.715   3
  -5   7 -14 870.499 166.337   2
  -5   7 -13 8870.82 575.263   3
  -5   7 -13 8432.09 482.395   2
  -5   7 -12 3740.65 314.256   2
  -5   7 -12 3409.24 349.199   3
  -5   7 -11 12911.0 669.552   3
  -5   7 -11 12273.8 553.262   2
  -5   7 -10 21272.2 716.325   2
  -5   7 -10 21947.5 856.098   3
  -5   7  -9 12759.9 639.468   3
  -5   7  -9 13342.4 544.319   2
  -5   7  -8 16823.8 727.616   3
  -5   7  -8 16736.6 603.027   2
  -5   7  -7 8797.32 423.728   2
  -5   7  -7 8472.70 502.149   3
  -5   7  -6 59980.5 1209.34   2
  -5   7  -6 59704.0 1408.17   3
  -5   7  -5 8576.90 412.084   2
  -5   7  -5 8070.22 479.765   3
  -5   7  -4 10264.2 273.947   1
  -5   7  -4 10118.1 275.631   1
  -5   7  -4 11611.2 561.571   3
  -5   7  -4 11259.7 465.675   2
  -5   7  -3 9822.86 434.886   2
  -5   7  -3 9224.27 264.328   1
  -5   7  -3 9175.58 494.330   3
  -5   7  -2 7191.68 238.567   1
  -5   7  -2 7464.23 442.867   3
  -5   7  -2 7394.44 379.258   2
  -5   7  -1 9077.44 418.251   2
  -5   7  -1 8508.62 472.740   3
  -5   7  -1 8737.18 275.133   1
  -5   7   0 12802.4 355.813   1
  -5   7   0 12990.5 583.611   3
  -5   7   1 11885.2 557.378   3
  -5   7   1 12240.6 369.527   1
  -5   7   2 3078.20 190.551   1
  -5   7   2 3074.77 288.733   3
  -5   7   3 15790.6 642.536   3
  -5   7   3 15679.5 464.354   1
  -5   7   4 674.385 108.315   1
  -5   7   4 717.001 156.666   3
  -5   7   5 20566.7 594.549   1
  -5   7   5 20081.6 748.871   3
  -5   7   6 1679.75 235.596   3
  -5   7   6 1532.59 169.701   1
  -5   7   7 19651.2 766.660   3
  -5   7   7 20123.8 638.201   1
  -5   7   8 254.992 153.340   3
  -5   7   8 84.9698 78.5812   1
  -5   7   9 7746.21 417.831   1
  -5   7   9 8125.13 509.824   3
  -5   7  10 888.072 199.444   3
  -5   7  10 927.568 163.826   1
  -5   7  11 57.9169 95.1814   3
  -5   7  11 75.2648 105.459   1
  -5   7  12 21166.7 788.766   1
  -5   7  12 20623.3 863.250   3
  -5   7  13 7052.03 471.066   1
  -5   7  13 7316.31 523.349   3
  -5   7  14 8099.39 520.482   1
  -5   7  15 713.759 195.190   1
  -5   7  15 552.542 205.572   6
  -5   7  16 8732.45 574.426   1
  -5   7  16 9394.97 693.284   6
  -5   7  17 175.813 136.156   1
  -5   7  17 59.5064 161.876   6
  -5   7  18 10419.6 670.351   1
  -5   7  18 11967.8 806.706   6
  -5   7  19 878.994 246.982   6
  -5   7  19 445.230 179.147   1
  -5   7  20 5539.30 574.279   6
  -5   7  20 5619.74 526.226   1
  -5   7  21 2996.43 429.691   6
  -5   7  22 4220.69 528.150   6
  -5   8 -18 500.081 201.173   3
  -5   8 -17 7967.27 602.481   3
  -5   8 -16 1349.89 263.135   3
  -5   8 -15 10241.1 649.149   3
  -5   8 -14 373.142 141.938   3
  -5   8 -13 10364.0 626.209   3
  -5   8 -12 12527.4 683.327   3
  -5   8 -11 3530.11 285.456   2
  -5   8 -11 3945.29 378.108   3
  -5   8 -10 13571.9 545.694   2
  -5   8 -10 14001.7 694.739   3
  -5   8  -9 700.339 157.048   2
  -5   8  -9 167.131 108.509   3
  -5   8  -8 31678.9 827.420   2
  -5   8  -8 32197.4 1044.50   3
  -5   8  -7-74.1746 80.4393   2
  -5   8  -7 78.9121 102.851   3
  -5   8  -6 35063.7 857.294   2
  -5   8  -6 35384.5 1072.68   3
  -5   8  -5 9504.06 420.522   2
  -5   8  -5 10319.2 556.526   3
  -5   8  -4 24241.6 856.390   3
  -5   8  -4 24584.9 690.928   2
  -5   8  -3 24491.6 687.560   2
  -5   8  -3 25623.6 872.961   3
  -5   8  -2 8013.54 483.109   3
  -5   8  -1 18675.3 322.847   1
  -5   8  -1 20259.9 758.487   3
  -5   8   0 7712.90 226.387   1
  -5   8   0 8162.86 475.842   3
  -5   8   1 29052.6 550.272   1
  -5   8   1 29089.6 927.457   3
  -5   8   2 466.381 146.099   3
  -5   8   2 334.711 72.8137   1
  -5   8   3 25321.5 584.610   1
  -5   8   3 25774.3 877.001   3
  -5   8   4 648.455 154.789   3
  -5   8   4 590.420 106.314   1
  -5   8   5 16575.3 714.579   3
  -5   8   5 17194.0 526.857   1
  -5   8   6 4211.64 268.111   1
  -5   8   6 4037.35 352.329   3
  -5   8   7 11713.6 615.590   3
  -5   8   7 11887.8 482.043   1
  -5   8   8 9246.95 443.417   1
  -5   8   8 8884.21 551.389   3
  -5   8   9 1190.22 162.652   1
  -5   8   9 1706.79 250.358   3
  -5   8  10 17839.4 674.158   1
  -5   8  10 17661.7 803.552   3
  -5   8  11 615.199 176.770   3
  -5   8  11 789.221 161.322   1
  -5   8  12 21955.1 811.216   1
  -5   8  12 22783.9 940.962   3
  -5   8  13 227.419 119.020   3
  -5   8  13 516.085 162.771   1
  -5   8  14 6667.92 476.922   1
  -5   8  15 25.9108 100.041   1
  -5   8  15-240.773 175.796   6
  -5   8  16 11280.9 779.420   6
  -5   8  16 10976.6 653.354   1
  -5   8  17 767.684 183.027   1
  -5   8  17 686.963 264.854   6
  -5   8  18 8400.66 705.816   6
  -5   8  18 7178.93 563.095   1
  -5   8  19 1348.41 288.386   1
  -5   8  19 1549.07 340.342   6
  -5   8  20 2783.75 424.777   6
  -5   8  20 2954.17 398.169   1
  -5   8  21 3192.80 465.624   6
  -5   9 -18 480.101 223.684   3
  -5   9 -17 7763.34 599.985   3
  -5   9 -16 1051.40 255.199   3
  -5   9 -15 3858.93 413.213   3
  -5   9 -14 2215.38 297.481   3
  -5   9 -13 1861.12 291.134   3
  -5   9 -12 10577.8 635.514   3
  -5   9 -11 357.561 148.757   3
  -5   9 -10 16659.2 779.430   3
  -5   9  -9 232.321 121.322   3
  -5   9  -8 27934.8 731.033   2
  -5   9  -8 28683.5 1005.87   3
  -5   9  -7 385.408 153.215   3
  -5   9  -7 534.087 116.699   2
  -5   9  -6 17026.6 545.237   2
  -5   9  -6 17256.3 755.445   3
  -5   9  -5 14374.7 678.565   3
  -5   9  -5 13004.8 468.392   2
  -5   9  -4 16825.3 729.281   3
  -5   9  -3 36146.5 1091.60   3
  -5   9  -2 25079.4 893.417   3
  -5   9  -1 9762.43 543.223   3
  -5   9   0 235.148 113.250   3
  -5   9   1 37849.0 1110.00   3
  -5   9   1 33196.9 534.275   1
  -5   9   2 3322.41 165.102   1
  -5   9   2 3547.90 340.927   3
  -5   9   3 20046.1 488.697   1
  -5   9   3 19841.0 804.180   3
  -5   9   4 11507.9 386.497   1
  -5   9   4 12846.3 648.766   3
  -5   9   5 12478.1 435.707   1
  -5   9   5 12533.0 650.850   3
  -5   9   6 20437.3 849.531   3
  -5   9   6 20861.8 612.796   1
  -5   9   7 225.456 111.092   3
  -5   9   7 331.773 103.332   1
  -5   9   8 436.811 116.559   1
  -5   9   8 419.174 129.197   3
  -5   9   9 6631.93 390.772   1
  -5   9   9 5848.96 476.843   3
  -5   9  10 14698.8 616.559   1
  -5   9  10 14906.3 769.947   3
  -5   9  11 1108.66 245.348   3
  -5   9  11 902.529 184.500   1
  -5   9  12 11128.3 577.119   1
  -5   9  12 11275.6 686.109   3
  -5   9  13 1099.26 186.173   1
  -5   9  14 10952.1 615.233   1
  -5   9  14 11972.3 786.690   6
  -5   9  15 306.046 195.931   6
  -5   9  15 248.092 160.630   1
  -5   9  16 4107.85 411.492   1
  -5   9  16 5464.96 557.648   6
  -5   9  17 3789.33 476.931   6
  -5   9  17 2296.50 331.721   1
  -5   9  18 2886.42 456.524   6
  -5   9  18 2057.53 314.568   1
  -5   9  19 4213.54 461.154   1
  -5   9  19 5368.14 586.077   6
  -5  10 -17 664.708 188.990   3
  -5  10 -16 3709.33 415.535   3
  -5  10 -15 1411.23 257.605   3
  -5  10 -14 5963.31 502.876   3
  -5  10 -13 1615.64 288.304   3
  -5  10 -12 15279.8 789.687   3
  -5  10 -11 362.705 197.609   3
  -5  10 -10 12044.8 683.868   3
  -5  10  -9 1643.56 271.842   3
  -5  10  -8 13400.1 702.386   3
  -5  10  -7 9264.69 574.888   3
  -5  10  -6 7730.02 518.598   3
  -5  10  -5 17446.0 777.631   3
  -5  10  -4 9761.59 575.884   3
  -5  10  -3 19179.5 809.327   3
  -5  10  -2 2818.66 315.863   3
  -5  10  -1 19722.4 819.192   3
  -5  10   0 7233.13 493.680   3
  -5  10   1 24698.6 929.236   3
  -5  10   2 4335.50 385.854   3
  -5  10   3 24336.1 941.834   3
  -5  10   4 10301.1 613.229   3
  -5  10   4 9013.56 338.434   1
  -5  10   5 4518.51 414.798   3
  -5  10   5 4068.54 248.054   1
  -5  10   6 15379.4 522.449   1
  -5  10   6 16986.6 813.114   3
  -5  10   7 614.324 175.125   3
  -5  10   7 671.403 129.170   1
  -5  10   8 13736.7 554.695   1
  -5  10   8 15430.9 794.311   3
  -5  10   9 151.033 153.144   3
  -5  10   9 117.011 86.6172   1
  -5  10  10 9892.70 648.101   3
  -5  10  10 10423.1 525.041   1
  -5  10  11 841.064 176.532   1
  -5  10  11 1261.13 270.420   3
  -5  10  12 6916.30 565.185   3
  -5  10  12 6795.52 454.347   1
  -5  10  13 4346.11 381.145   1
  -5  10  14 1715.83 260.701   1
  -5  10  14 1825.18 338.777   6
  -5  10  15 3747.62 461.886   6
  -5  10  15 3293.19 367.510   1
  -5  10  16 1675.06 306.234   1
  -5  10  16 1892.87 345.747   6
  -5  10  17 7165.22 664.098   6
  -5  10  17 5147.92 482.110   1
  -5  10  18 1620.39 302.079   1
  -5  10  18 2136.37 396.455   6
  -5  10  19 5633.26 547.884   1
  -5  11 -16 1310.93 283.666   3
  -5  11 -15 237.342 190.233   3
  -5  11 -14 8353.60 614.237   3
  -5  11 -13 113.925 171.609   3
  -5  11 -12 7829.28 575.571   3
  -5  11 -11 887.429 223.845   3
  -5  11 -10 7314.59 545.488   3
  -5  11  -9 2711.55 349.083   3
  -5  11  -8 2981.23 351.392   3
  -5  11  -7 5327.67 456.220   3
  -5  11  -6 4102.12 401.198   3
  -5  11  -5 20167.1 871.553   3
  -5  11  -4 1719.25 267.862   3
  -5  11  -3 20731.2 878.021   3
  -5  11  -2 724.273 207.609   3
  -5  11  -1 27544.4 1023.54   3
  -5  11   0 2261.25 300.251   3
  -5  11   1 10556.8 632.852   3
  -5  11   2 10029.0 628.223   3
  -5  11   3 11207.5 671.287   3
  -5  11   4 15031.1 781.338   3
  -5  11   5 461.490 153.677   3
  -5  11   6 14413.4 789.300   3
  -5  11   7-70.9913 135.700   3
  -5  11   8 15113.8 824.118   3
  -5  11   9 670.212 191.028   3
  -5  11   9 744.197 142.783   1
  -5  11  10 7932.03 461.025   1
  -5  11  10 8726.39 631.330   3
  -5  11  11 4254.86 468.608   3
  -5  11  11 3963.10 338.630   1
  -5  11  12 2824.86 386.742   3
  -5  11  12 2716.76 299.737   1
  -5  11  13 7192.53 635.386   6
  -5  11  13 6054.91 469.968   1
  -5  11  14-107.694 158.954   1
  -5  11  14-17.4000 220.685   6
  -5  11  15 3801.89 399.013   1
  -5  11  15 3574.06 475.283   6
  -5  11  16 181.907 194.244   6
  -5  12 -15 3174.47 402.459   3
  -5  12 -14 5730.11 523.032   3
  -5  12 -13 345.663 183.702   3
  -5  12 -12 2003.55 322.523   3
  -5  12 -11 2073.94 341.956   3
  -5  12 -10 888.151 228.969   3
  -5  12  -9 8636.13 600.744   3
  -5  12  -8 1535.84 274.390   3
  -5  12  -7 9582.92 629.605   3
  -5  12  -6 7.92692 112.702   3
  -5  12  -5 11667.8 689.712   3
  -5  12  -4 736.381 211.819   3
  -5  12  -3 14593.7 768.998   3
  -5  12  -2 4714.97 444.797   3
  -5  12  -1 8116.24 578.534   3
  -5  12   0 12163.3 712.023   3
  -5  12   1 3723.57 400.533   3
  -5  12   2 10951.6 693.035   3
  -5  12   3 3778.64 413.325   3
  -5  12   4 17901.5 900.426   3
  -5  12   5 264.490 163.225   3
  -5  12   6 11927.6 752.762   3
  -5  12   7 3015.45 394.526   3
  -5  12   8 11123.3 735.951   3
  -5  12   9 6444.39 571.476   3
  -5  12  10 2863.43 388.661   3
  -5  12  11 9307.44 691.466   3
  -5  12  12 502.919 226.447   6
  -5  12  13 3955.08 489.866   6
  -5  12  14-9.89079 200.493   6
  -5  12  15 9950.23 798.030   6
  -5  13 -13 5662.03 529.142   3
  -5  13 -12 1201.83 272.899   3
  -5  13 -11 6075.61 540.314   3
  -5  13 -10 13.5974 139.529   3
  -5  13  -9 6377.53 556.124   3
  -5  13  -8 239.087 149.327   3
  -5  13  -7 6435.59 541.823   3
  -5  13  -6 524.138 207.639   3
  -5  13  -5 10354.9 680.346   3
  -5  13  -4 4521.86 455.091   3
  -5  13  -3 7742.17 582.974   3
  -5  13  -2 7298.68 577.938   3
  -5  13  -1 5494.38 501.600   3
  -5  13   0 12762.9 767.292   3
  -5  13   1 1793.53 307.533   3
  -5  13   2 14912.0 843.883   3
  -5  13   3 787.020 227.468   3
  -5  13   4 13045.4 802.961   3
  -5  13   5 1290.60 280.746   3
  -5  13   6 13973.0 840.263   3
  -5  13   7 8338.17 655.152   3
  -5  13   8 5607.27 560.511   3
  -5  13   9 12713.9 824.672   3
  -5  13  10 2440.25 396.756   3
  -5  13  11 9792.47 766.751   6
  -5  13  12 399.112 232.562   6
  -5  13  13 6637.03 650.299   6
  -5  14 -12 421.311 220.968   3
  -5  14 -11 3620.47 439.417   3
  -5  14 -10 608.766 223.464   3
  -5  14  -9 3285.34 423.210   3
  -5  14  -8 419.123 197.487   3
  -5  14  -7 6450.16 571.846   3
  -5  14  -6 1477.82 302.067   3
  -5  14  -5 3889.83 448.163   3
  -5  14  -4 6099.67 546.723   3
  -5  14  -3 1707.21 308.874   3
  -5  14  -2 4281.49 458.567   3
  -5  14  -1 1483.67 292.398   3
  -5  14   0 12326.2 791.566   3
  -5  14   1 151.905 159.028   3
  -5  14   2 13318.0 839.904   3
  -5  14   3 1972.78 338.783   3
  -5  14   4 10929.7 777.158   3
  -5  14   5 3478.84 450.303   3
  -5  14   6 2970.98 421.547   3
  -5  14   7 5056.32 554.512   3
  -5  14   8 1878.52 333.808   3
  -5  14   9 6889.64 626.864   3
  -5  14  10 58.7535 173.851   6
  -5  14  11 7109.98 684.789   6
  -5  15 -10 2327.14 390.241   3
  -5  15  -9 2510.45 375.503   3
  -5  15  -8 3472.84 452.802   3
  -5  15  -7 2252.04 372.793   3
  -5  15  -6 3213.57 428.999   3
  -5  15  -5 78.0465 160.675   3
  -5  15  -4 4534.68 487.174   3
  -5  15  -3-142.567 190.281   3
  -5  15  -2 5711.79 567.871   3
  -5  15  -1 1675.78 345.945   3
  -5  15   0 9186.79 722.788   3
  -5  15   1 256.373 668.735   3
  -5  15   2 8640.44 703.375   3
  -5  15   3 417.205 163.249   3
  -5  15   4 7580.96 675.300   3
  -5  15   5 7133.27 649.717   3
  -5  15   6 2796.37 415.754   3
  -5  15   7 6835.71 638.288   3
  -5  15   8-311.012 205.743   6
  -5  16  -4 1450.87 335.116   3
  -5  16  -3 566.025 227.814   3
  -5  16  -2 5882.40 602.935   3
  -5  16  -1 1339.25 317.200   3
  -5  16   0 2046.02 376.056   3
  -5  16   1 103.101 174.072   3
  -4 -13  -2 3419.65 414.400   5
  -4 -13  -1-273.371 274.499   5
  -4 -13   0 2560.80 352.822   5
  -4 -13   1-137.156 281.369   5
  -4 -13   2 2551.00 366.261   5
  -4 -13   3 377.617 191.105   5
  -4 -13   4 2680.11 413.348   5
  -4 -13   5 2302.93 390.658   5
  -4 -13   6 1825.47 335.619   5
  -4 -13   7 1370.94 304.752   1
  -4 -13   7 2130.43 421.625   5
  -4 -12  -9 6918.48 591.376   2
  -4 -12  -8 4422.81 477.578   2
  -4 -12  -7 3049.93 395.413   2
  -4 -12  -3-65.2762 177.974   5
  -4 -12  -2 4111.57 426.577   5
  -4 -12  -1 79.1173 195.186   5
  -4 -12   0 4339.52 447.760   5
  -4 -12   1 403.935 199.875   5
  -4 -12   2 2880.67 408.195   5
  -4 -12   3 2269.71 380.489   5
  -4 -12   4 947.603 250.253   5
  -4 -12   5 5899.21 581.717   5
  -4 -12   6 962.997 274.022   5
  -4 -12   7 3994.60 479.953   5
  -4 -12   7 2593.34 426.138   1
  -4 -12   8 387.271 258.711   5
  -4 -12   8 564.537 218.737   1
  -4 -12   9 5595.45 598.873   5
  -4 -12   9 5193.87 561.806   1
  -4 -12  10-342.114 235.877   5
  -4 -12  10-1.70127 177.288   1
  -4 -12  11 2838.04 458.032   1
  -4 -11 -11 5707.34 558.923   2
  -4 -11 -10 4281.08 477.662   2
  -4 -11  -9 5877.59 534.125   2
  -4 -11  -8 4655.69 467.222   2
  -4 -11  -7 1577.58 284.636   2
  -4 -11  -6 7672.76 560.711   2
  -4 -11  -5-259.464 177.775   2
  -4 -11  -4 7783.11 542.806   5
  -4 -11  -4 7514.55 530.754   2
  -4 -11  -3 1300.23 245.229   2
  -4 -11  -3 1591.63 247.090   5
  -4 -11  -2 3745.85 366.563   2
  -4 -11  -2 3503.01 374.856   5
  -4 -11  -1 3344.52 335.770   2
  -4 -11  -1 3683.55 397.078   5
  -4 -11   0 5750.23 498.092   5
  -4 -11   0 5561.50 430.199   2
  -4 -11   1 3991.52 427.887   5
  -4 -11   2 5.80321 177.991   5
  -4 -11   3 6427.53 556.998   5
  -4 -11   4-35.2946 181.732   5
  -4 -11   5 3514.50 416.254   5
  -4 -11   6 354.481 207.163   5
  -4 -11   7 4772.00 528.115   5
  -4 -11   8 138.809 199.111   5
  -4 -11   8 179.749 152.612   1
  -4 -11   9 5841.49 585.128   5
  -4 -11   9 4418.89 511.542   1
  -4 -11  10 1496.69 339.377   5
  -4 -11  10 1592.37 305.119   1
  -4 -11  11 2617.37 1152.41   5
  -4 -11  11 2262.99 357.676   1
  -4 -11  12 2268.29 406.200   5
  -4 -11  12 1352.36 294.986   1
  -4 -11  13 3792.29 490.206   5
  -4 -11  13 2717.68 444.234   1
  -4 -11  14 2479.75 412.039   1
  -4 -10 -12 5890.36 560.240   2
  -4 -10 -11 3299.83 441.115   2
  -4 -10 -10 7772.68 612.510   2
  -4 -10  -9 2943.94 388.944   2
  -4 -10  -8 6186.72 518.351   2
  -4 -10  -7-88.8286 146.336   2
  -4 -10  -6 9363.42 606.427   2
  -4 -10  -5 727.407 175.720   5
  -4 -10  -5 630.688 205.313   2
  -4 -10  -4 6516.12 487.039   2
  -4 -10  -4 6025.54 461.398   5
  -4 -10  -3 3887.79 368.331   2
  -4 -10  -3 4259.25 398.790   5
  -4 -10  -2 6491.65 468.090   2
  -4 -10  -2 6571.76 508.250   5
  -4 -10  -1 4068.66 396.272   5
  -4 -10  -1 4419.15 387.572   2
  -4 -10   0 3442.16 365.941   5
  -4 -10   0 3865.29 352.891   2
  -4 -10   1 9476.82 621.931   5
  -4 -10   1 10377.1 567.374   2
  -4 -10   2 2620.34 350.512   5
  -4 -10   2 3314.38 329.710   2
  -4 -10   3 18855.5 910.616   5
  -4 -10   3 20794.8 812.065   2
  -4 -10   4 2255.21 332.191   5
  -4 -10   4 1813.12 225.845   2
  -4 -10   5 3805.72 334.992   2
  -4 -10   5 4130.41 441.257   5
  -4 -10   6 63.5528 201.864   5
  -4 -10   7 3679.82 430.180   5
  -4 -10   8 1666.38 318.334   1
  -4 -10   8 2560.34 378.354   5
  -4 -10   9 2181.52 325.933   1
  -4 -10   9 2509.10 359.447   5
  -4 -10  10 3936.03 490.154   5
  -4 -10  10 3569.28 411.045   1
  -4 -10  11 3342.72 463.791   5
  -4 -10  11 3150.73 395.097   1
  -4 -10  12 7066.39 647.990   5
  -4 -10  12 5507.20 548.032   1
  -4 -10  13 2408.37 435.158   5
  -4 -10  13 1214.27 302.279   1
  -4 -10  14 3755.97 501.265   5
  -4 -10  14 2943.40 422.410   1
  -4 -10  15 501.044 239.342   1
  -4 -10  15 564.546 277.752   5
  -4 -10  16 5230.53 539.049   1
  -4 -10  17-270.506 214.482   1
  -4  -9 -13 2631.15 399.885   2
  -4  -9 -12 9219.82 695.711   2
  -4  -9 -11 2039.70 360.317   2
  -4  -9 -10 6929.28 582.185   2
  -4  -9  -9 437.282 204.637   2
  -4  -9  -8 8849.00 615.588   2
  -4  -9  -7 729.478 207.320   2
  -4  -9  -6 9532.76 523.894   5
  -4  -9  -6 10735.9 641.648   2
  -4  -9  -5 2189.66 262.125   5
  -4  -9  -5 2384.57 297.696   2
  -4  -9  -4 13850.5 658.496   5
  -4  -9  -4 16132.0 753.924   2
  -4  -9  -3 6772.38 481.376   2
  -4  -9  -3 6076.98 445.603   5
  -4  -9  -2 5106.77 407.748   2
  -4  -9  -2 4008.37 367.246   5
  -4  -9  -1 6080.10 437.222   2
  -4  -9  -1 4961.70 416.812   5
  -4  -9   0 534.091 171.212   5
  -4  -9   0 629.044 165.292   2
  -4  -9   1 16902.2 724.604   2
  -4  -9   1 15616.9 765.365   5
  -4  -9   2 1158.61 212.396   2
  -4  -9   2 650.804 180.179   5
  -4  -9   3 4426.67 420.051   5
  -4  -9   3 5079.44 403.798   2
  -4  -9   4 2326.17 299.723   5
  -4  -9   4 2579.62 282.906   2
  -4  -9   5 7163.76 542.738   5
  -4  -9   5 7675.70 489.652   2
  -4  -9   6 5493.22 410.486   2
  -4  -9   6 5535.42 484.305   5
  -4  -9   7 8051.60 582.169   5
  -4  -9   8 2438.40 346.621   5
  -4  -9   8 1929.18 305.214   1
  -4  -9   9-59.6650 185.755   5
  -4  -9   9-80.0597 134.519   1
  -4  -9  10 10832.2 712.664   5
  -4  -9  10 8832.66 633.145   1
  -4  -9  11 1064.48 262.908   1
  -4  -9  11 1550.10 298.060   5
  -4  -9  12 4627.09 483.160   1
  -4  -9  12 5257.52 518.609   5
  -4  -9  13 97.8615 186.570   5
  -4  -9  13-121.236 174.517   1
  -4  -9  14 1605.17 369.794   5
  -4  -9  14 1131.04 260.311   1
  -4  -9  15-46.8634 176.356   5
  -4  -9  15 396.472 204.920   1
  -4  -9  16 3863.57 474.923   1
  -4  -9  17 106.075 214.658   1
  -4  -9  18 3948.98 487.546   1
  -4  -9  19 2700.66 419.900   1
  -4  -8 -14 5677.86 571.263   2
  -4  -8 -13 1255.40 303.397   2
  -4  -8 -12 8238.86 662.487   2
  -4  -8 -11 520.651 219.576   2
  -4  -8 -10 8331.13 632.477   2
  -4  -8  -9 423.559 204.263   2
  -4  -8  -8 11610.8 692.158   2
  -4  -8  -7 3944.85 401.693   2
  -4  -8  -7 3074.38 279.220   5
  -4  -8  -6 20670.8 734.286   5
  -4  -8  -6 21671.8 909.175   2
  -4  -8  -5 8865.32 484.539   5
  -4  -8  -5 10696.7 623.892   2
  -4  -8  -4 4834.95 413.427   2
  -4  -8  -4 4531.08 360.741   5
  -4  -8  -3 10191.3 580.250   2
  -4  -8  -3 9508.31 515.877   5
  -4  -8  -2 280.799 137.147   2
  -4  -8  -2 255.744 141.061   5
  -4  -8  -1 13250.3 631.341   5
  -4  -8  -1 13067.3 642.744   2
  -4  -8   0 3239.57 323.496   5
  -4  -8   0 3897.64 349.531   2
  -4  -8   1 13928.3 672.259   5
  -4  -8   1 14828.4 673.082   2
  -4  -8   2 2445.03 297.012   5
  -4  -8   2 2899.37 301.997   2
  -4  -8   3 11015.3 613.719   5
  -4  -8   3 11719.1 591.474   2
  -4  -8   4 8604.09 548.333   5
  -4  -8   4 8448.19 500.301   2
  -4  -8   5 5011.87 437.776   5
  -4  -8   5 4162.98 360.558   2
  -4  -8   6 8539.85 559.338   5
  -4  -8   6 7637.81 492.195   2
  -4  -8   7 1902.01 287.030   5
  -4  -8   8 10759.3 644.641   5
  -4  -8   8 8875.89 606.761   1
  -4  -8   9 245.866 175.794   5
  -4  -8   9-265.352 173.211   1
  -4  -8  10 12770.0 727.193   1
  -4  -8  10 15076.1 784.277   5
  -4  -8  11 217.699 165.173   5
  -4  -8  11-402.348 162.139   1
  -4  -8  12 5523.50 495.890   5
  -4  -8  12 5381.02 484.956   1
  -4  -8  13 2514.09 351.117   1
  -4  -8  13 3168.18 406.737   5
  -4  -8  14 1779.46 300.436   1
  -4  -8  14 1815.50 336.968   5
  -4  -8  15 5921.26 527.876   1
  -4  -8  16 1438.40 294.535   1
  -4  -8  17 698.533 223.704   1
  -4  -8  18 3506.04 452.087   1
  -4  -8  19 2743.15 423.010   1
  -4  -8  20 636.947 234.762   1
  -4  -7 -15 292.860 243.805   2
  -4  -7 -14 14938.4 921.723   2
  -4  -7 -13-97.2828 174.308   2
  -4  -7 -12 2839.80 407.245   2
  -4  -7 -11 577.195 212.394   2
  -4  -7 -10 12612.5 757.444   2
  -4  -7  -9 2109.00 316.498   2
  -4  -7  -8 6425.52 523.567   2
  -4  -7  -7 3219.19 265.857   5
  -4  -7  -7 3701.84 387.134   2
  -4  -7  -6 2986.14 259.345   5
  -4  -7  -6 3497.52 361.932   2
  -4  -7  -5 25774.4 967.258   2
  -4  -7  -5 22745.4 729.557   5
  -4  -7  -4 5127.29 350.958   5
  -4  -7  -4 5538.10 438.285   2
  -4  -7  -3 19923.1 817.589   2
  -4  -7  -3 18972.6 683.803   5
  -4  -7  -2 746.027 184.302   2
  -4  -7  -2 825.161 181.370   5
  -4  -7  -1 23744.1 802.485   5
  -4  -7  -1 25286.7 900.536   2
  -4  -7   0 3599.56 339.190   2
  -4  -7   0 3602.48 329.749   5
  -4  -7   1 15732.4 663.246   5
  -4  -7   1 15336.1 684.874   2
  -4  -7   2 6740.54 433.753   5
  -4  -7   2 7342.61 463.206   2
  -4  -7   3 9032.94 516.748   2
  -4  -7   3 8948.29 504.903   5
  -4  -7   4 18231.1 741.742   5
  -4  -7   4 17507.6 720.606   2
  -4  -7   5 1391.60 215.057   2
  -4  -7   5 1926.86 263.236   5
  -4  -7   6 19768.8 796.987   5
  -4  -7   6 19549.3 763.771   2
  -4  -7   7 748.333 203.636   5
  -4  -7   8 22059.4 874.268   5
  -4  -7   8 20464.1 884.388   1
  -4  -7   9 650.305 196.571   5
  -4  -7   9 671.595 187.219   1
  -4  -7  10 3989.60 383.979   5
  -4  -7  10 3989.99 394.701   1
  -4  -7  11 4701.54 436.512   5
  -4  -7  11 4948.56 450.036   1
  -4  -7  12 7626.75 557.171   5
  -4  -7  12 6820.16 525.929   1
  -4  -7  13 8056.55 573.349   5
  -4  -7  13 7974.66 577.934   1
  -4  -7  14 1316.17 259.364   1
  -4  -7  15 3492.45 396.641   1
  -4  -7  16 4072.05 455.957   1
  -4  -7  17 4994.21 479.102   1
  -4  -7  18 272.314 143.915   1
  -4  -7  19 2492.52 379.887   1
  -4  -7  20 151.600 178.565   1
  -4  -7  21 1979.14 345.246   1
  -4  -6 -16 7543.75 700.054   2
  -4  -6 -15 285.896 232.088   2
  -4  -6 -14 9934.59 748.641   2
  -4  -6 -13 1487.02 310.738   2
  -4  -6 -12 3319.28 426.279   2
  -4  -6 -11 2147.78 330.090   2
  -4  -6 -10 6240.74 544.518   2
  -4  -6  -9 11103.8 692.052   2
  -4  -6  -8 3763.32 244.406   5
  -4  -6  -8 4386.01 432.724   2
  -4  -6  -7 17765.7 557.426   5
  -4  -6  -7 19454.8 878.536   2
  -4  -6  -6 671.076 140.197   5
  -4  -6  -6 1108.42 236.919   2
  -4  -6  -5 29847.9 774.923   5
  -4  -6  -5 30691.8 1061.17   2
  -4  -6  -4 1005.86 171.158   5
  -4  -6  -4 660.074 195.712   2
  -4  -6  -3 13443.9 524.737   5
  -4  -6  -3 13551.4 671.035   2
  -4  -6  -2 4691.93 325.398   5
  -4  -6  -2 5294.15 415.234   2
  -4  -6  -1 19596.5 669.446   5
  -4  -6  -1 20513.8 804.475   2
  -4  -6   0 13827.4 569.889   5
  -4  -6   0 13844.6 647.916   2
  -4  -6   1 20486.7 704.294   5
  -4  -6   1 20597.0 788.442   2
  -4  -6   2 11243.9 571.502   2
  -4  -6   2 11596.4 532.357   5
  -4  -6   3 2676.85 265.513   5
  -4  -6   3 2313.08 258.355   2
  -4  -6   4 26567.6 651.718   6
  -4  -6   4 26087.8 876.221   2
  -4  -6   4 26887.7 853.848   5
  -4  -6   5 1123.63 126.685   6
  -4  -6   5 1148.95 213.142   5
  -4  -6   5 672.470 147.801   2
  -4  -6   6 38728.5 1067.62   5
  -4  -6   6 35127.0 670.290   6
  -4  -6   6 35333.3 1036.03   2
  -4  -6   7 9576.73 540.223   5
  -4  -6   7 9091.49 511.148   2
  -4  -6   8 12291.1 613.397   5
  -4  -6   8 11555.9 630.931   1
  -4  -6   9 3931.52 370.964   1
  -4  -6   9 4516.66 389.299   5
  -4  -6  10 12192.6 657.453   1
  -4  -6  10 11514.6 620.835   5
  -4  -6  11 9266.63 578.684   1
  -4  -6  11 8796.47 550.329   5
  -4  -6  12 3725.20 362.876   5
  -4  -6  12 3845.29 385.174   1
  -4  -6  13 11959.2 681.215   1
  -4  -6  14 773.812 199.186   1
  -4  -6  15 10992.4 680.224   1
  -4  -6  16 346.090 148.676   1
  -4  -6  17 6586.58 540.614   1
  -4  -6  18-96.8536 145.682   1
  -4  -6  19 4290.85 462.696   1
  -4  -6  20 1055.58 269.475   1
  -4  -6  21 2544.95 387.879   1
  -4  -5 -17 151.315 212.674   2
  -4  -5 -16 9401.84 766.884   2
  -4  -5 -15 2687.11 409.918   2
  -4  -5 -14 4385.03 506.210   2
  -4  -5 -13 7817.11 652.338   2
  -4  -5 -12 4720.67 496.004   2
  -4  -5 -11 9631.74 679.342   2
  -4  -5 -10 4727.28 469.848   2
  -4  -5  -9 15360.3 815.109   2
  -4  -5  -8 822.409 113.350   5
  -4  -5  -8 696.101 195.385   2
  -4  -5  -7 19719.5 518.586   5
  -4  -5  -7 21590.2 915.958   2
  -4  -5  -6-13.1058 75.4477   5
  -4  -5  -6 141.457 110.460   2
  -4  -5  -5 16380.1 501.629   5
  -4  -5  -5 16548.2 764.932   2
  -4  -5  -4 4414.21 274.925   5
  -4  -5  -4 4740.71 396.227   2
  -4  -5  -3 23846.1 647.275   5
  -4  -5  -3 24728.2 913.304   2
  -4  -5  -2 4636.02 285.823   5
  -4  -5  -2 4904.85 398.568   2
  -4  -5  -1 15384.7 533.090   5
  -4  -5  -1 14655.2 672.075   2
  -4  -5   0 10090.5 541.572   2
  -4  -5   0 10653.3 455.227   5
  -4  -5   1 21458.8 804.139   2
  -4  -5   1 23402.5 701.326   5
  -4  -5   2 32707.9 855.599   5
  -4  -5   2 29376.4 938.855   2
  -4  -5   3 96.9453 90.9938   2
  -4  -5   3 226.250 78.9057   6
  -4  -5   3 224.887 115.560   5
  -4  -5   4 29338.5 924.323   2
  -4  -5   4 31741.1 690.882   6
  -4  -5   4 31758.4 876.159   5
  -4  -5   5 1122.78 200.240   5
  -4  -5   5 1062.42 121.350   6
  -4  -5   5 551.640 146.586   2
  -4  -5   6 31389.7 694.292   3
  -4  -5   6 32602.0 616.291   6
  -4  -5   6 29868.5 930.415   2
  -4  -5   6 32708.3 930.239   5
  -4  -5   7 11351.2 549.604   5
  -4  -5   7 10444.8 282.310   6
  -4  -5   7 10786.4 359.242   3
  -4  -5   7 10831.1 546.697   2
  -4  -5   8 16809.3 732.229   1
  -4  -5   8 16814.1 687.249   5
  -4  -5   8 16235.8 394.623   3
  -4  -5   9 15980.2 684.710   5
  -4  -5   9 15710.8 710.587   1
  -4  -5  10 9540.93 560.971   1
  -4  -5  10 8543.50 509.740   5
  -4  -5  11 18091.9 786.500   1
  -4  -5  12 762.121 169.159   1
  -4  -5  13 15387.9 752.615   1
  -4  -5  14 229.230 167.564   1
  -4  -5  15 16281.1 800.831   1
  -4  -5  16 1762.42 275.036   1
  -4  -5  17 5859.38 495.504   1
  -4  -5  18 1994.92 317.695   1
  -4  -5  19 3843.47 433.740   1
  -4  -5  20 1544.85 289.788   1
  -4  -5  21 2459.60 373.852   1
  -4  -5  22 1181.23 272.029   1
  -4  -4 -18 1164.17 351.068   2
  -4  -4 -17 6745.53 676.075   2
  -4  -4 -16 4351.11 542.321   2
  -4  -4 -15 4318.99 517.885   2
  -4  -4 -14 2808.68 420.424   2
  -4  -4 -13 4822.89 518.447   2
  -4  -4 -12 300.951 182.847   2
  -4  -4 -11 18575.8 940.355   2
  -4  -4 -10-5.30482 155.512   2
  -4  -4  -9 14460.8 787.962   2
  -4  -4  -8 323.213 68.1408   5
  -4  -4  -8 363.557 161.814   2
  -4  -4  -7 8191.38 266.763   5
  -4  -4  -7 8860.22 581.096   2
  -4  -4  -6 332.126 153.142   2
  -4  -4  -6 210.085 102.176   5
  -4  -4  -5 21196.6 505.594   5
  -4  -4  -5 22303.0 897.511   2
  -4  -4  -4 5278.14 254.606   5
  -4  -4  -4 5436.48 437.512   2
  -4  -4  -3 11448.8 606.827   2
  -4  -4  -3 11916.6 393.958   5
  -4  -4  -2 15154.6 463.033   5
  -4  -4  -2 15090.1 685.266   2
  -4  -4  -1 6543.43 313.206   5
  -4  -4  -1 6084.89 420.257   2
  -4  -4   0 17917.4 544.827   5
  -4  -4   0 16034.0 684.761   2
  -4  -4   1 2037.94 246.888   2
  -4  -4   1 2044.23 198.313   5
  -4  -4   2 38308.5 1064.80   2
  -4  -4   2 41789.9 922.570   5
  -4  -4   3 222.305 110.646   2
  -4  -4   3 383.169 131.399   5
  -4  -4   3 341.781 90.8150   6
  -4  -4   4 18999.3 495.763   6
  -4  -4   4 18651.3 707.757   2
  -4  -4   4 19031.9 635.054   5
  -4  -4   5 7119.96 391.379   5
  -4  -4   5 7133.67 428.751   2
  -4  -4   5 7362.47 280.067   6
  -4  -4   6 11234.6 503.921   5
  -4  -4   6 10769.3 320.718   6
  -4  -4   6 10558.7 524.802   2
  -4  -4   7 16731.6 644.486   5
  -4  -4   7 16813.2 414.865   3
  -4  -4   7 17495.6 707.322   1
  -4  -4   7 16624.1 667.952   2
  -4  -4   7 17111.5 382.303   6
  -4  -4   8 7444.73 210.963   6
  -4  -4   8 7087.51 225.745   3
  -4  -4   8 8138.37 463.535   5
  -4  -4   8 7816.60 480.388   1
  -4  -4   9 28987.0 928.976   1
  -4  -4   9 24129.9 355.322   6
  -4  -4  10 4359.76 367.937   1
  -4  -4  11 25184.5 904.476   1
  -4  -4  12 479.545 156.496   1
  -4  -4  13 14530.5 706.108   1
  -4  -4  14 2880.28 332.460   1
  -4  -4  15 7796.62 539.936   1
  -4  -4  16 5526.57 465.248   1
  -4  -4  17 3357.25 371.260   1
  -4  -4  18 6318.68 517.624   1
  -4  -4  19 904.744 237.237   1
  -4  -4  20 4206.78 449.910   1
  -4  -4  21 1517.28 307.868   1
  -4  -4  22 5612.49 546.666   1
  -4  -3 -18 2483.83 457.981   2
  -4  -3 -17 6208.63 655.868   2
  -4  -3 -16 171.484 227.769   2
  -4  -3 -15 9886.66 761.657   2
  -4  -3 -14 146.038 158.960   2
  -4  -3 -13 8561.92 670.163   2
  -4  -3 -12 567.498 223.573   2
  -4  -3 -11 23103.4 1043.10   2
  -4  -3 -10 850.922 241.994   2
  -4  -3  -9 15130.8 805.968   2
  -4  -3  -8 7133.60 532.158   2
  -4  -3  -7 13219.2 710.426   2
  -4  -3  -7 12574.9 422.827   4
  -4  -3  -6 8188.08 228.181   5
  -4  -3  -6 8968.79 576.673   2
  -4  -3  -6 8744.22 354.750   4
  -4  -3  -5 7253.37 235.111   5
  -4  -3  -5 7324.29 504.033   2
  -4  -3  -4 24584.0 507.490   5
  -4  -3  -4 24391.1 903.902   2
  -4  -3  -3 96.4313 100.454   2
  -4  -3  -3 31.8662 53.0321   5
  -4  -3  -2 20524.7 502.770   5
  -4  -3  -2 19089.3 765.939   2
  -4  -3  -1 140.794 82.5746   5
  -4  -3  -1 57.3162 93.6572   2
  -4  -3   0 31480.3 954.558   2
  -4  -3   0 31759.2 702.817   5
  -4  -3   1 569.612 151.269   2
  -4  -3   1 237.707 92.0155   5
  -4  -3   2 24594.3 652.702   5
  -4  -3   2 24801.0 810.445   2
  -4  -3   2 24489.0 621.403   6
  -4  -3   3 2735.43 221.824   5
  -4  -3   3 2546.47 258.203   2
  -4  -3   3 2471.93 176.955   6
  -4  -3   4 17007.9 651.784   2
  -4  -3   4 16554.2 563.523   5
  -4  -3   4 16537.3 451.992   6
  -4  -3   5 9099.48 425.804   5
  -4  -3   5 8701.76 460.802   2
  -4  -3   5 8717.34 304.044   6
  -4  -3   6 10246.5 505.232   2
  -4  -3   6 10863.3 326.429   6
  -4  -3   6 10972.3 485.699   5
  -4  -3   7 23416.7 482.207   6
  -4  -3   7 24071.1 801.983   1
  -4  -3   8 2240.46 128.194   6
  -4  -3   8 2276.78 246.296   1
  -4  -3   8 2140.02 101.644   3
  -4  -3   9 44406.6 670.241   6
  -4  -3   9 45478.6 1169.82   1
  -4  -3  10 657.478 166.212   1
  -4  -3  10 384.427 52.6263   6
  -4  -3  11 23172.7 408.875   6
  -4  -3  11 23284.9 386.026   6
  -4  -3  12 10943.5 577.653   1
  -4  -3  12 7879.39 186.241   6
  -4  -3  13 21303.8 839.292   1
  -4  -3  14 22661.6 886.444   1
  -4  -3  15 6510.06 483.415   1
  -4  -3  16 5746.45 467.040   1
  -4  -3  17 1613.47 273.430   1
  -4  -3  18 11810.9 701.730   1
  -4  -3  19-189.004 135.554   1
  -4  -3  20 9402.94 654.134   1
  -4  -3  21-7.97925 151.656   1
  -4  -3  22 4263.70 474.238   1
  -4  -2 -19 6342.06 694.041   2
  -4  -2 -18 1158.04 340.079   2
  -4  -2 -17 10472.7 831.242   2
  -4  -2 -16 1302.37 322.242   2
  -4  -2 -15 15222.4 942.856   2
  -4  -2 -14 813.513 263.208   2
  -4  -2 -13 15896.5 912.796   2
  -4  -2 -12 3250.26 414.597   2
  -4  -2 -11 16015.9 861.777   2
  -4  -2 -10 36869.1 1296.44   2
  -4  -2  -9 396.774 157.799   2
  -4  -2  -8 7115.57 285.281   4
  -4  -2  -8 6821.09 522.528   2
  -4  -2  -7 3410.97 369.393   2
  -4  -2  -7 3590.15 208.505   4
  -4  -2  -6 11956.3 655.125   2
  -4  -2  -6 12909.6 414.396   4
  -4  -2  -5 1767.60 246.437   2
  -4  -2  -5 1892.60 161.914   4
  -4  -2  -4 27682.9 944.665   2
  -4  -2  -3 211.017 110.314   2
  -4  -2  -2 28205.3 907.592   2
  -4  -2  -1 1013.26 175.551   2
  -4  -2   0 22719.7 767.281   2
  -4  -2   1 6793.42 404.186   2
  -4  -2   2 12076.7 531.534   2
  -4  -2   2 11845.4 404.779   6
  -4  -2   3 7986.59 317.234   6
  -4  -2   3 8000.04 424.765   2
  -4  -2   4 13975.6 568.211   2
  -4  -2   4 13393.5 403.927   6
  -4  -2   5 22947.6 526.680   6
  -4  -2   5 22786.3 744.272   2
  -4  -2   6 3944.64 307.745   2
  -4  -2   6 4245.57 206.070   6
  -4  -2   7 31276.2 888.842   1
  -4  -2   7 29197.1 530.410   3
  -4  -2   7 30764.3 592.757   6
  -4  -2   8 3726.50 311.491   1
  -4  -2   8 3225.92 134.254   3
  -4  -2   8 3042.68 166.340   6
  -4  -2   9 22744.2 777.412   1
  -4  -2   9 22375.5 474.766   6
  -4  -2  10 8890.97 277.408   6
  -4  -2  10 10153.8 521.725   1
  -4  -2  11 26998.8 888.752   1
  -4  -2  11 24855.2 501.434   6
  -4  -2  12 14270.4 404.591   6
  -4  -2  12 15233.8 673.144   1
  -4  -2  13 17520.5 442.500   6
  -4  -2  13 19368.8 780.330   1
  -4  -2  14 18618.1 783.683   1
  -4  -2  14 16661.2 423.286   6
  -4  -2  15 8197.89 528.845   1
  -4  -2  16 4426.32 402.400   1
  -4  -2  17 1145.14 219.666   1
  -4  -2  18 19701.6 900.179   1
  -4  -2  19 2105.63 313.830   1
  -4  -2  20 12965.6 763.396   1
  -4  -2  21 3102.95 389.203   1
  -4  -2  22 2687.31 382.189   1
  -4  -2  23 2918.21 398.509   1
  -4  -1 -20 1327.50 362.546   2
  -4  -1 -19 9885.55 827.605   2
  -4  -1 -18 1642.53 403.286   2
  -4  -1 -17 17663.7 1056.67   2
  -4  -1 -16 1619.98 344.678   2
  -4  -1 -15 11105.4 784.434   2
  -4  -1 -14 4289.34 502.870   2
  -4  -1 -13 8837.55 672.144   2
  -4  -1 -12 18205.0 932.996   2
  -4  -1 -11 3519.37 414.755   2
  -4  -1 -10 33318.0 1205.11   2
  -4  -1  -9 2461.65 334.073   2
  -4  -1  -9 3141.75 178.653   4
  -4  -1  -8 35139.6 688.909   4
  -4  -1  -8 32663.5 1131.08   2
  -4  -1  -7 96.8113 64.4184   4
  -4  -1  -7 185.061 154.530   2
  -4  -1  -6 31944.0 1049.10   2
  -4  -1  -6 33880.6 710.094   4
  -4  -1  -5 111.902 101.327   2
  -4  -1  -5 129.622 50.9127   4
  -4  -1  -4 23655.4 837.198   2
  -4  -1  -4 25135.0 618.718   4
  -4  -1  -3 13554.4 610.131   2
  -4  -1  -2 32746.6 939.324   2
  -4  -1  -1 8667.56 457.481   2
  -4  -1   0 16277.9 614.061   2
  -4  -1   1 13013.3 541.580   2
  -4  -1   2 1512.93 141.793   6
  -4  -1   2 1285.83 165.751   2
  -4  -1   3 53464.7 941.345   6
  -4  -1   3 54500.5 1174.44   2
  -4  -1   4 3815.96 200.972   6
  -4  -1   4 3735.02 280.884   2
  -4  -1   5 71401.2 1405.94   2
  -4  -1   5 71165.2 1101.08   6
  -4  -1   6 429.225 76.4640   3
  -4  -1   6 455.525 135.278   1
  -4  -1   6 236.207 115.585   2
  -4  -1   6 369.870 73.5369   6
  -4  -1   7 23314.3 734.079   1
  -4  -1   7 22516.5 462.209   3
  -4  -1   7 23253.3 524.320   6
  -4  -1   8 7285.95 230.472   3
  -4  -1   8 7788.75 427.061   1
  -4  -1   9 15800.6 628.212   1
  -4  -1   9 14563.5 326.602   3
  -4  -1  10 7274.78 430.197   1
  -4  -1  11 20596.1 758.968   1
  -4  -1  12 25934.9 876.640   1
  -4  -1  13 6307.36 315.693   6
  -4  -1  13 6842.50 447.439   1
  -4  -1  14 20614.2 579.282   6
  -4  -1  14 22465.5 850.243   1
  -4  -1  15 323.301 100.991   6
  -4  -1  15 472.552 149.831   1
  -4  -1  16 23624.9 631.507   6
  -4  -1  16 26060.2 966.567   1
  -4  -1  17 360.878 146.337   1
  -4  -1  18 18113.4 849.036   1
  -4  -1  19 8175.26 587.200   1
  -4  -1  20 12680.9 750.998   1
  -4  -1  21 9136.27 653.866   1
  -4  -1  22 2588.44 371.582   1
  -4  -1  23 7192.59 621.270   1
  -4   0 -20 5.66903 226.406   2
  -4   0 -19 11737.1 893.170   2
  -4   0 -18-15.3624 192.547   2
  -4   0 -17 8940.29 750.142   2
  -4   0 -16 3692.91 469.099   2
  -4   0 -15 11357.4 785.538   2
  -4   0 -14 11046.8 752.154   2
  -4   0 -13 8501.52 645.770   2
  -4   0 -12 17039.5 882.601   2
  -4   0 -11 7405.61 572.383   2
  -4   0 -10 24387.0 987.548   2
  -4   0  -9 1329.16 129.447   4
  -4   0  -9 1696.77 275.424   2
  -4   0  -8 34316.7 1122.04   2
  -4   0  -8 36038.0 715.866   4
  -4   0  -7 8085.14 315.424   4
  -4   0  -7 7520.25 500.205   2
  -4   0  -6 42395.0 1175.09   2
  -4   0  -6 43487.3 834.615   4
  -4   0  -5 15707.6 467.714   4
  -4   0  -5 15476.7 659.327   2
  -4   0  -4 33901.5 963.166   2
  -4   0  -4 33238.9 730.512   4
  -4   0  -3 31556.5 714.494   4
  -4   0  -3 31340.1 897.135   2
  -4   0  -2 9575.86 462.823   2
  -4   0  -1 14736.0 564.840   2
  -4   0   0 256.139 105.664   2
  -4   0   1 9705.63 443.361   2
  -4   0   2 14673.6 446.366   6
  -4   0   2 14712.7 544.532   2
  -4   0   3 45910.6 1031.74   2
  -4   0   3 44881.7 851.710   6
  -4   0   4 90298.7 1596.64   2
  -4   0   4 90266.5 1338.56   6
  -4   0   5 68286.4 1292.52   1
  -4   0   5 66043.6 1033.62   3
  -4   0   5 66746.8 1074.81   6
  -4   0   5 66929.5 1326.18   2
  -4   0   6 886.235 102.523   3
  -4   0   6 1024.97 163.793   1
  -4   0   7 10726.2 476.991   1
  -4   0   7 11344.1 331.588   3
  -4   0   8 8346.28 281.436   3
  -4   0   8 9635.60 463.673   1
  -4   0   9 9954.38 485.080   1
  -4   0   9 8984.89 299.181   3
  -4   0  10 18542.1 432.715   3
  -4   0  10 17994.7 678.151   1
  -4   0  11 4053.54 325.998   1
  -4   0  12 34666.8 1010.12   1
  -4   0  13 1669.52 233.208   1
  -4   0  13 1739.79 198.311   6
  -4   0  14 29642.9 805.590   6
  -4   0  14 30435.8 990.818   1
  -4   0  15 752.487 187.414   1
  -4   0  15 488.015 128.913   6
  -4   0  16 21504.7 677.406   6
  -4   0  16 22109.9 883.938   1
  -4   0  17 3188.14 353.836   1
  -4   0  17 2805.85 239.718   6
  -4   0  18 7465.65 538.256   1
  -4   0  18 6554.42 376.479   6
  -4   0  19 7165.16 545.119   1
  -4   0  20 5793.53 509.049   1
  -4   0  21 4869.57 471.037   1
  -4   0  22 2000.74 337.434   1
  -4   0  23 5666.97 544.988   1
  -4   1 -21 8074.04 772.791   2
  -4   1 -20-308.783 244.178   2
  -4   1 -19 8124.01 748.524   2
  -4   1 -18 2849.26 424.718   2
  -4   1 -17 18004.3 1012.12   2
  -4   1 -16 6848.28 602.861   2
  -4   1 -15 3798.67 459.939   2
  -4   1 -14 11270.8 737.887   2
  -4   1 -13 2076.70 348.033   2
  -4   1 -12 26205.7 1057.66   2
  -4   1 -11 85.3093 116.734   2
  -4   1 -10 19514.7 852.060   2
  -4   1 -10 20327.2 511.590   4
  -4   1  -9 4944.95 412.967   2
  -4   1  -9 4513.17 234.715   4
  -4   1  -8 27689.3 632.807   4
  -4   1  -8 27507.2 946.939   2
  -4   1  -7 28874.4 936.179   2
  -4   1  -7 27952.2 644.571   4
  -4   1  -6 23615.6 588.308   4
  -4   1  -6 22365.6 785.212   2
  -4   1  -5 43924.6 1098.34   2
  -4   1  -5 43659.4 855.778   4
  -4   1  -4 4164.13 307.986   2
  -4   1  -4 3806.97 223.481   4
  -4   1  -3 23520.9 723.207   2
  -4   1  -2 15792.3 571.471   2
  -4   1  -1 42979.1 974.400   2
  -4   1   0 83.7655 70.5814   2
  -4   1   1 34279.5 847.232   2
  -4   1   2 323.643 100.568   2
  -4   1   3 20424.1 646.407   2
  -4   1   3 21046.8 548.201   6
  -4   1   4 11549.6 382.561   3
  -4   1   4 11426.1 483.299   2
  -4   1   4 11800.3 458.559   1
  -4   1   5 5457.43 328.336   2
  -4   1   5 5656.26 254.266   3
  -4   1   5 5922.69 325.598   1
  -4   1   6 12369.1 489.502   1
  -4   1   6 11516.3 364.183   3
  -4   1   7 5402.10 245.887   3
  -4   1   7 5883.09 347.616   1
  -4   1   8 20032.4 508.468   3
  -4   1   8 21595.8 696.485   1
  -4   1   9 6020.90 370.281   1
  -4   1   9 5968.50 276.777   3
  -4   1  10 12483.1 546.858   1
  -4   1  10 11582.9 400.583   3
  -4   1  11 716.334 146.398   1
  -4   1  12 26086.4 857.715   1
  -4   1  13 999.634 187.399   1
  -4   1  13 1206.69 190.250   6
  -4   1  14 26779.2 924.207   1
  -4   1  14 27271.3 842.845   6
  -4   1  15 6029.52 448.493   1
  -4   1  15 5933.66 386.133   6
  -4   1  16 15100.2 621.615   6
  -4   1  16 15077.5 721.122   1
  -4   1  17 7635.20 439.021   6
  -4   1  17 8238.27 546.744   1
  -4   1  18 2423.13 263.232   6
  -4   1  18 2569.60 321.616   1
  -4   1  19 4641.49 440.602   1
  -4   1  19 4387.71 343.428   6
  -4   1  20 2080.02 308.010   1
  -4   1  21 12563.3 757.699   1
  -4   1  22 414.075 208.097   1
  -4   1  23 12435.9 805.332   1
  -4   2 -21 8136.60 731.102   2
  -4   2 -20 78.9750 190.009   2
  -4   2 -19 5455.54 581.441   2
  -4   2 -18 2015.57 360.998   2
  -4   2 -17 5400.08 547.376   2
  -4   2 -16 6822.61 590.263   2
  -4   2 -15 398.765 174.067   2
  -4   2 -14 19593.4 929.893   2
  -4   2 -13-156.311 177.473   2
  -4   2 -12 39816.1 1266.43   2
  -4   2 -11 2824.54 344.977   2
  -4   2 -10 12369.5 635.412   2
  -4   2  -9 36611.7 1087.17   2
  -4   2  -8 20633.3 771.185   2
  -4   2  -7 46061.0 1150.57   2
  -4   2  -6 10073.1 489.014   2
  -4   2  -5 36916.3 942.146   2
  -4   2  -4 5393.68 330.008   2
  -4   2  -3 44025.5 980.449   2
  -4   2  -2 317.505 121.503   2
  -4   2  -1 38582.7 884.227   2
  -4   2   0 8908.17 396.993   2
  -4   2   1 30443.6 771.353   2
  -4   2   2 16279.1 553.978   2
  -4   2   2 16534.3 495.180   3
  -4   2   3 5545.38 291.274   1
  -4   2   3 5530.84 321.424   2
  -4   2   3 5673.63 276.867   3
  -4   2   4 42786.0 838.473   3
  -4   2   4 42421.1 968.742   2
  -4   2   4 43119.8 908.901   1
  -4   2   5 10618.1 374.755   3
  -4   2   5 11216.1 440.908   1
  -4   2   6 14056.6 435.346   3
  -4   2   6 14122.5 516.288   1
  -4   2   7 1301.67 165.567   1
  -4   2   7 1442.32 141.434   3
  -4   2   8 13637.9 447.107   3
  -4   2   8 13588.0 533.993   1
  -4   2   9 41.1512 74.7440   3
  -4   2   9 82.5408 74.7776   1
  -4   2  10 15790.2 610.658   1
  -4   2  10 14653.2 508.677   3
  -4   2  11 331.722 100.218   3
  -4   2  11 224.334 106.997   1
  -4   2  12 6722.80 423.752   1
  -4   2  13 4214.41 347.898   1
  -4   2  14 14997.7 675.693   1
  -4   2  14 14941.8 665.832   6
  -4   2  15 7077.36 479.446   1
  -4   2  15 7831.41 482.967   6
  -4   2  16 13938.4 646.674   6
  -4   2  16 13269.6 678.420   1
  -4   2  17 24741.6 959.382   1
  -4   2  17 26620.1 910.717   6
  -4   2  18 8.66737 127.767   1
  -4   2  18 60.9707 115.552   6
  -4   2  19 7366.20 555.938   1
  -4   2  19 7012.25 468.046   6
  -4   2  20 500.568 193.042   1
  -4   2  20 293.209 111.406   6
  -4   2  21 10857.2 705.951   1
  -4   2  22 2058.47 362.523   1
  -4   2  23 8848.18 682.137   1
  -4   3 -21 3597.64 477.219   2
  -4   3 -20 3960.93 514.732   2
  -4   3 -19 724.311 266.159   2
  -4   3 -18 2315.86 369.753   2
  -4   3 -17 2051.43 318.891   2
  -4   3 -16 12360.6 758.712   2
  -4   3 -15-39.5176 129.004   2
  -4   3 -14 19047.1 869.098   2
  -4   3 -13 41.3205 132.988   2
  -4   3 -12 24877.0 932.497   2
  -4   3 -11 16060.6 718.116   2
  -4   3 -10 15188.0 668.299   2
  -4   3  -9 37956.2 1045.80   2
  -4   3  -8 7628.30 438.355   2
  -4   3  -7 37764.2 963.859   2
  -4   3  -6 646.097 153.744   2
  -4   3  -5 32400.9 824.265   2
  -4   3  -4 15566.3 538.310   2
  -4   3  -3 51801.0 1038.16   2
  -4   3  -2 12532.5 464.183   2
  -4   3  -1 74871.5 1297.68   2
  -4   3   0 37104.1 831.627   3
  -4   3   0 34581.2 814.574   2
  -4   3   1 8498.42 381.992   2
  -4   3   1 8616.50 369.327   3
  -4   3   2 26022.7 629.048   1
  -4   3   2 25992.8 700.684   2
  -4   3   2 25500.8 658.103   3
  -4   3   3 1422.07 147.187   3
  -4   3   3 1275.49 158.401   2
  -4   3   3 1204.73 133.279   1
  -4   3   4 34106.8 764.756   3
  -4   3   4 33850.7 770.193   1
  -4   3   5 863.824 122.449   3
  -4   3   5 960.880 134.834   1
  -4   3   6 23925.1 626.664   3
  -4   3   6 24101.2 674.346   1
  -4   3   7 1098.21 142.441   3
  -4   3   7 1067.55 155.177   1
  -4   3   8 29323.6 796.574   1
  -4   3   8 29171.0 741.319   3
  -4   3   9 604.726 134.401   3
  -4   3   9 778.991 149.082   1
  -4   3  10 20388.3 696.175   1
  -4   3  10 19462.1 641.168   3
  -4   3  11 10884.8 480.432   3
  -4   3  11 11476.9 532.840   1
  -4   3  12 575.294 156.027   1
  -4   3  13 15347.5 660.191   1
  -4   3  14 3468.48 320.665   1
  -4   3  14 3515.11 348.691   6
  -4   3  15 16428.7 744.813   6
  -4   3  15 15324.2 701.911   1
  -4   3  16 355.349 159.134   6
  -4   3  16-2.43746 101.204   1
  -4   3  17 16162.0 773.682   1
  -4   3  17 18115.9 798.413   6
  -4   3  18 1329.30 236.950   6
  -4   3  18 1507.66 267.031   1
  -4   3  19 9475.84 632.123   1
  -4   3  19 10485.4 620.520   6
  -4   3  20 1498.38 301.628   1
  -4   3  20 1180.36 227.310   6
  -4   3  21 6492.43 550.909   1
  -4   3  21 7742.14 549.020   6
  -4   3  22 4245.71 474.037   1
  -4   4 -21 916.373 262.890   2
  -4   4 -20 2904.59 415.734   2
  -4   4 -19 1740.78 316.307   2
  -4   4 -18 13386.6 797.254   2
  -4   4 -17 142.447 155.814   2
  -4   4 -16 11416.3 692.254   2
  -4   4 -15 1255.78 227.276   2
  -4   4 -14 11830.4 647.025   2
  -4   4 -13 3904.80 373.324   2
  -4   4 -12 14595.0 668.714   2
  -4   4 -11 22505.6 808.871   2
  -4   4 -10 13396.6 591.142   2
  -4   4  -9 22765.6 744.320   2
  -4   4  -8 331.261 128.152   2
  -4   4  -7 45641.6 879.509   1
  -4   4  -7 46283.0 1027.63   2
  -4   4  -6 0.11550 56.9448   1
  -4   4  -6 70.7852 85.2018   2
  -4   4  -5 58354.0 1123.60   2
  -4   4  -4 12873.9 465.403   2
  -4   4  -3 51258.2 1079.98   3
  -4   4  -3 50410.4 1002.39   2
  -4   4  -2 46797.4 1008.61   3
  -4   4  -2 44710.0 927.351   2
  -4   4  -1 53636.9 1034.38   2
  -4   4  -1 54220.3 1091.78   3
  -4   4   0 55979.2 1073.13   2
  -4   4   0 56936.2 1114.31   3
  -4   4   1 8917.90 393.133   3
  -4   4   1 8638.20 377.624   2
  -4   4   1 8694.88 320.279   1
  -4   4   2 67828.4 1095.42   1
  -4   4   2 66675.5 1223.44   2
  -4   4   2 66326.9 1217.55   3
  -4   4   3 207.521 95.0897   3
  -4   4   3 216.683 64.6670   1
  -4   4   4 40349.0 892.612   3
  -4   4   4 41746.0 847.933   1
  -4   4   5 2526.81 209.100   3
  -4   4   5 2119.83 178.468   1
  -4   4   6 28192.7 738.433   3
  -4   4   6 29036.7 732.758   1
  -4   4   7 10518.0 437.125   1
  -4   4   7 10501.1 444.426   3
  -4   4   8 36719.4 894.243   1
  -4   4   8 35072.0 884.329   3
  -4   4   9 12919.8 526.544   1
  -4   4   9 13193.9 536.709   3
  -4   4  10 2276.68 231.239   3
  -4   4  10 2640.27 252.391   1
  -4   4  11 13319.5 572.616   3
  -4   4  11 13932.3 585.322   1
  -4   4  12 1908.30 223.094   1
  -4   4  13 7750.94 461.181   1
  -4   4  14 84.2409 106.623   1
  -4   4  14 64.2054 137.888   6
  -4   4  15 17887.1 763.027   1
  -4   4  15 18640.2 835.097   6
  -4   4  16 304.958 136.927   1
  -4   4  16 161.849 113.518   6
  -4   4  17 18613.4 831.265   1
  -4   4  17 19180.3 868.159   6
  -4   4  18 288.876 151.743   6
  -4   4  18 232.098 168.752   1
  -4   4  19 8814.88 615.371   1
  -4   4  19 8581.02 599.195   6
  -4   4  20 4169.79 424.415   6
  -4   4  20 3493.90 414.037   1
  -4   4  21 5221.11 503.810   1
  -4   4  21 5080.43 479.683   6
  -4   4  22 5718.53 548.296   1
  -4   4  22 6024.88 534.859   6
  -4   5 -20 1601.73 298.873   2
  -4   5 -19 138.288 156.086   2
  -4   5 -18 13480.8 752.988   2
  -4   5 -17 301.978 183.036   2
  -4   5 -16 5583.64 461.868   2
  -4   5 -15 604.168 192.449   2
  -4   5 -14 4750.10 403.775   2
  -4   5 -13 8573.45 505.859   2
  -4   5 -12 7921.18 459.120   2
  -4   5 -11 15485.6 628.562   2
  -4   5 -10 2563.55 253.007   2
  -4   5  -9 32527.1 861.378   2
  -4   5  -8 142.002 72.0220   1
  -4   5  -8 46.0029 97.8310   2
  -4   5  -7 35301.4 698.157   1
  -4   5  -7 35789.8 847.955   2
  -4   5  -6 1051.94 137.945   2
  -4   5  -6 1035.41 104.140   1
  -4   5  -6 1184.65 173.711   3
  -4   5  -5 39819.5 707.324   1
  -4   5  -5 43031.9 1017.50   3
  -4   5  -5 41601.9 882.395   2
  -4   5  -4 38335.7 832.200   2
  -4   5  -4 37889.3 944.484   3
  -4   5  -3 11514.1 488.350   3
  -4   5  -3 11004.3 415.129   2
  -4   5  -2 75076.4 1402.73   3
  -4   5  -2 79085.3 1300.29   2
  -4   5  -1 8848.89 369.333   2
  -4   5  -1 8292.49 277.031   1
  -4   5  -1 8659.84 410.538   3
  -4   5   0 71920.8 1057.69   1
  -4   5   0 74100.6 1261.62   2
  -4   5   0 72186.0 1334.61   3
  -4   5   1 213.329 65.2987   1
  -4   5   1 254.909 93.4844   2
  -4   5   1 460.550 133.666   3
  -4   5   2 31485.2 646.925   1
  -4   5   2 31914.2 814.159   3
  -4   5   3 5662.04 259.719   1
  -4   5   3 5761.20 327.659   3
  -4   5   4 16740.4 486.509   1
  -4   5   4 16631.2 572.075   3
  -4   5   5 11117.4 407.035   1
  -4   5   5 10839.6 463.173   3
  -4   5   6 23784.8 646.747   1
  -4   5   6 24025.2 719.299   3
  -4   5   7 22700.7 654.172   1
  -4   5   7 22685.3 716.778   3
  -4   5   8 9389.53 428.561   1
  -4   5   8 9274.23 462.199   3
  -4   5   9 26871.0 835.294   3
  -4   5   9 26647.1 771.302   1
  -4   5  10 2791.05 283.361   3
  -4   5  10 2878.23 257.665   1
  -4   5  11 20282.5 714.403   1
  -4   5  11 19680.9 744.397   3
  -4   5  12 185.494 82.3854   3
  -4   5  12 35.9711 89.0298   1
  -4   5  13 6139.36 418.379   1
  -4   5  14 415.903 151.524   6
  -4   5  14 428.524 142.215   1
  -4   5  15 9939.37 571.150   1
  -4   5  15 11467.8 674.622   6
  -4   5  16 3027.19 333.871   1
  -4   5  16 2950.63 346.905   6
  -4   5  17 7071.50 553.506   6
  -4   5  17 6805.34 506.245   1
  -4   5  18 3988.43 431.790   6
  -4   5  18 3360.42 384.663   1
  -4   5  19 6029.37 502.961   1
  -4   5  19 6830.14 561.251   6
  -4   5  20 3468.14 424.850   6
  -4   5  20 2870.13 359.735   1
  -4   5  21 242.523 177.605   6
  -4   5  21 250.895 629.879   1
  -4   5  22 5497.76 542.011   1
  -4   5  22 5661.63 559.715   6
  -4   5  23 81.8280 184.971   6
  -4   6 -19 455.486 157.348   3
  -4   6 -18 10705.3 642.794   3
  -4   6 -17 3474.00 354.235   2
  -4   6 -17 3484.41 364.833   3
  -4   6 -16 5150.76 416.894   2
  -4   6 -16 4742.79 418.910   3
  -4   6 -15 6968.99 465.186   2
  -4   6 -15 8141.91 523.223   3
  -4   6 -14 600.423 163.512   3
  -4   6 -14 865.650 194.194   2
  -4   6 -13 9204.40 532.036   3
  -4   6 -13 8012.75 460.337   2
  -4   6 -12 224.295 118.489   2
  -4   6 -12-90.1581 106.745   3
  -4   6 -11 12065.0 588.440   3
  -4   6 -11 12852.3 533.932   2
  -4   6 -10 240.967 117.659   3
  -4   6 -10 395.480 131.307   2
  -4   6  -9 21707.7 655.525   2
  -4   6  -9 22342.7 778.923   3
  -4   6  -8 3228.20 242.009   2
  -4   6  -8 3515.56 303.043   3
  -4   6  -8 3135.97 174.589   1
  -4   6  -7 34970.7 964.506   3
  -4   6  -7 34936.4 808.059   2
  -4   6  -7 34688.5 624.775   1
  -4   6  -6 17019.7 526.444   2
  -4   6  -6 16281.2 370.120   1
  -4   6  -6 17591.9 648.823   3
  -4   6  -5 5024.48 275.347   2
  -4   6  -5 4823.49 172.291   1
  -4   6  -5 4940.19 336.850   3
  -4   6  -4 17466.2 519.766   2
  -4   6  -4 17009.0 340.653   1
  -4   6  -4 17090.0 625.566   3
  -4   6  -3 15603.8 586.130   3
  -4   6  -3 14618.3 311.332   1
  -4   6  -3 15579.6 485.316   2
  -4   6  -2 51533.1 974.191   2
  -4   6  -2 51495.3 1125.68   3
  -4   6  -2 49823.7 713.524   1
  -4   6  -1 2605.10 212.991   2
  -4   6  -1 2660.43 258.337   3
  -4   6  -1 2140.88 118.239   1
  -4   6   0 80862.5 1495.81   3
  -4   6   0 82441.9 1344.52   2
  -4   6   0 82552.7 1093.41   1
  -4   6   1 1733.52 207.309   3
  -4   6   1 1569.99 118.899   1
  -4   6   2 41106.0 987.899   3
  -4   6   2 41509.3 737.116   1
  -4   6   3 8758.90 434.736   3
  -4   6   3 8780.11 317.392   1
  -4   6   4 15503.9 458.195   1
  -4   6   4 15716.8 590.787   3
  -4   6   5 42277.5 859.549   1
  -4   6   5 41819.0 1029.15   3
  -4   6   6 14506.7 491.063   1
  -4   6   6 14524.7 589.519   3
  -4   6   7 42388.8 934.075   1
  -4   6   7 42306.8 1077.88   3
  -4   6   8 1736.92 221.312   3
  -4   6   8 1876.88 198.321   1
  -4   6   9 17183.6 606.508   1
  -4   6   9 17144.8 694.908   3
  -4   6  10 801.503 171.275   3
  -4   6  10 545.345 113.086   1
  -4   6  11 20614.4 807.595   3
  -4   6  11 20670.7 727.519   1
  -4   6  12 547.139 166.506   3
  -4   6  12 649.345 140.585   1
  -4   6  13 10565.7 551.836   1
  -4   6  14 3772.09 349.157   1
  -4   6  14 4071.20 408.674   6
  -4   6  15 4500.64 435.585   6
  -4   6  15 3915.41 359.371   1
  -4   6  16 6115.17 471.663   1
  -4   6  16 6072.83 517.569   6
  -4   6  17 903.733 195.843   1
  -4   6  17 1428.58 277.603   6
  -4   6  18 6968.87 534.102   1
  -4   6  18 7330.71 599.413   6
  -4   6  19-115.076 194.333   6
  -4   6  19 701.106 207.006   1
  -4   6  20 6382.49 548.487   1
  -4   6  20 7799.00 644.837   6
  -4   6  21 357.305 172.844   1
  -4   6  21 266.876 184.077   6
  -4   6  22 5946.25 580.955   6
  -4   6  23 473.581 225.146   6
  -4   7 -19 2115.75 301.070   3
  -4   7 -18 1643.99 261.125   3
  -4   7 -17 8099.76 551.592   3
  -4   7 -16 1486.81 249.913   3
  -4   7 -15 7349.47 446.893   2
  -4   7 -15 7640.81 515.786   3
  -4   7 -14-15.8556 129.803   3
  -4   7 -14 383.350 145.445   2
  -4   7 -13 9279.43 470.349   2
  -4   7 -13 9275.53 548.194   3
  -4   7 -12 774.751 170.978   3
  -4   7 -12 1140.31 173.242   2
  -4   7 -11 5165.36 317.599   2
  -4   7 -11 6056.40 423.893   3
  -4   7 -10 5388.33 393.358   3
  -4   7 -10 5605.93 319.739   2
  -4   7  -9 9154.76 396.170   2
  -4   7  -9 9281.92 511.050   3
  -4   7  -8 2836.59 278.331   3
  -4   7  -8 2879.09 221.652   2
  -4   7  -7 23029.1 609.576   2
  -4   7  -7 20229.6 362.178   1
  -4   7  -7 23121.1 784.512   3
  -4   7  -6 18504.6 515.958   2
  -4   7  -6 17818.0 661.793   3
  -4   7  -5 2957.92 266.021   3
  -4   7  -5 2469.22 185.658   2
  -4   7  -4 8342.84 341.761   2
  -4   7  -4 8214.78 445.401   3
  -4   7  -3 516.083 122.641   3
  -4   7  -3 596.296 102.362   2
  -4   7  -2 44824.0 874.592   2
  -4   7  -2 43037.2 1063.51   3
  -4   7  -1 4787.78 334.273   3
  -4   7  -1 4829.55 126.248   1
  -4   7   0 44786.5 1081.46   3
  -4   7   0 45459.4 638.679   1
  -4   7   1 18475.3 664.603   3
  -4   7   1 18070.7 383.831   1
  -4   7   2 44321.1 1082.76   3
  -4   7   2 44389.3 736.976   1
  -4   7   3 33492.1 655.739   1
  -4   7   3 33166.9 930.238   3
  -4   7   4 18461.1 492.369   1
  -4   7   4 17762.2 672.082   3
  -4   7   5 25825.4 632.226   1
  -4   7   5 25704.6 829.835   3
  -4   7   6 1128.63 215.574   3
  -4   7   6 816.256 141.662   1
  -4   7   7 38534.7 1078.83   3
  -4   7   7 38301.6 880.555   1
  -4   7   8 2370.69 218.897   1
  -4   7   8 2233.03 268.851   3
  -4   7   9 8765.72 519.088   3
  -4   7   9 8768.17 433.692   1
  -4   7  10 4230.70 374.504   3
  -4   7  10 4258.48 317.867   1
  -4   7  11 9551.67 486.545   1
  -4   7  11 9202.46 556.049   3
  -4   7  12 3757.72 321.816   1
  -4   7  13 4917.57 384.049   1
  -4   7  13 5393.53 473.993   6
  -4   7  14 5164.64 476.681   6
  -4   7  14 4348.67 369.977   1
  -4   7  15 1775.05 253.947   1
  -4   7  15 1937.61 310.468   6
  -4   7  16 16981.5 792.877   1
  -4   7  16 18074.0 931.553   6
  -4   7  17 714.229 235.989   6
  -4   7  17 38.2885 135.214   1
  -4   7  18 7047.84 550.927   1
  -4   7  18 7854.62 644.321   6
  -4   7  19 307.377 195.489   1
  -4   7  19 319.832 185.770   6
  -4   7  20 7095.78 629.580   6
  -4   7  20 6535.09 560.233   1
  -4   7  21 10.7420 218.809   6
  -4   7  21 469.729 202.531   1
  -4   7  22 3873.78 491.409   6
  -4   8 -18-32.8132 134.276   3
  -4   8 -17 10946.8 643.184   3
  -4   8 -16-203.153 190.796   4
  -4   8 -16 425.691 165.646   3
  -4   8 -15 5644.52 450.062   3
  -4   8 -14 549.214 162.391   3
  -4   8 -13 5922.42 444.813   3
  -4   8 -12 2005.51 261.258   3
  -4   8 -12 1749.35 186.831   2
  -4   8 -11 4829.07 289.464   2
  -4   8 -11 5594.16 416.338   3
  -4   8 -10 5404.11 398.884   3
  -4   8 -10 5073.78 283.942   2
  -4   8  -9 16700.3 519.530   2
  -4   8  -9 17368.7 719.369   3
  -4   8  -8 22145.8 800.886   3
  -4   8  -8 20966.2 569.254   2
  -4   8  -7-10.0201 59.9844   2
  -4   8  -7 64.4783 93.4737   3
  -4   8  -6 23024.4 573.091   2
  -4   8  -6 23037.9 795.636   3
  -4   8  -5 9734.49 355.895   2
  -4   8  -5 9588.30 503.008   3
  -4   8  -4 28677.8 641.563   2
  -4   8  -4 28451.4 878.932   3
  -4   8  -3 657.869 138.715   3
  -4   8  -2 21998.6 756.831   3
  -4   8  -1 9988.73 504.562   3
  -4   8   0 20554.7 734.008   3
  -4   8   1 25954.1 838.212   3
  -4   8   1 24351.4 435.494   1
  -4   8   2 12916.1 587.216   3
  -4   8   2 12830.3 333.961   1
  -4   8   3 34778.8 668.477   1
  -4   8   3 36128.7 1022.80   3
  -4   8   4 2588.70 278.243   3
  -4   8   4 2520.64 176.933   1
  -4   8   5 37109.8 783.478   1
  -4   8   5 38813.9 1099.62   3
  -4   8   6 48.1944 122.188   3
  -4   8   6 43.0647 71.3810   1
  -4   8   7 23169.2 661.134   1
  -4   8   7 22775.0 858.365   3
  -4   8   8 514.785 151.323   3
  -4   8   8 579.807 117.038   1
  -4   8   9 27924.9 806.180   1
  -4   8   9 27861.1 982.765   3
  -4   8  10 30379.2 1052.58   3
  -4   8  10 31636.4 897.087   1
  -4   8  11 3387.73 360.197   3
  -4   8  11 2994.32 287.134   1
  -4   8  12 40157.0 1105.93   1
  -4   8  13 5904.66 510.505   6
  -4   8  13 5564.21 416.332   1
  -4   8  14 10538.4 694.821   6
  -4   8  14 9799.33 567.743   1
  -4   8  15 131.088 182.839   6
  -4   8  15 10.0112 101.301   1
  -4   8  16 6544.61 505.420   1
  -4   8  16 7234.06 608.358   6
  -4   8  17 1291.22 265.105   1
  -4   8  17 1620.87 319.138   6
  -4   8  18 5023.67 476.435   1
  -4   8  18 5799.69 563.707   6
  -4   8  19 2335.23 375.947   6
  -4   8  19 2193.48 336.944   1
  -4   8  20 2327.63 361.102   1
  -4   8  20 3307.26 459.350   6
  -4   8  21 1259.38 315.501   6
  -4   9 -17 9011.23 593.288   3
  -4   9 -16 110.819 123.536   3
  -4   9 -16 168.975 183.529   4
  -4   9 -15 11122.2 637.807   3
  -4   9 -14 8215.25 539.578   3
  -4   9 -13 3418.05 349.528   3
  -4   9 -12 5888.87 440.042   3
  -4   9 -11 706.800 186.123   3
  -4   9 -10 7686.42 495.530   3
  -4   9  -9 45.4592 114.476   3
  -4   9  -8 15908.7 693.363   3
  -4   9  -8 15163.5 432.085   2
  -4   9  -7 85.6779 112.231   3
  -4   9  -7 187.832 69.0575   2
  -4   9  -6 24272.3 848.737   3
  -4   9  -5 3226.64 317.836   3
  -4   9  -4 26436.0 875.326   3
  -4   9  -3 114.501 114.150   3
  -4   9  -2 9054.40 500.067   3
  -4   9  -1 15439.1 663.634   3
  -4   9   0 8012.22 478.520   3
  -4   9   1 32262.4 991.158   3
  -4   9   2 3617.10 328.125   3
  -4   9   3 38811.6 1126.55   3
  -4   9   4 119.302 76.6074   1
  -4   9   4 14.3408 109.833   3
  -4   9   5 40540.5 834.940   1
  -4   9   5 40465.9 1183.50   3
  -4   9   6 2481.81 208.319   1
  -4   9   6 2573.63 307.281   3
  -4   9   7 18106.1 794.331   3
  -4   9   7 17871.6 589.757   1
  -4   9   8 7048.54 382.646   1
  -4   9   8 7547.57 521.101   3
  -4   9   9 18095.4 819.436   3
  -4   9   9 16949.9 629.625   1
  -4   9  10 29804.4 886.915   1
  -4   9  10 31444.7 1107.47   3
  -4   9  11 4369.24 428.068   3
  -4   9  11 4248.38 343.019   1
  -4   9  12 15322.3 834.639   6
  -4   9  12 14418.3 653.331   1
  -4   9  13 1098.52 256.087   6
  -4   9  13 905.034 175.196   1
  -4   9  14 11938.7 760.631   6
  -4   9  14 10359.4 596.946   1
  -4   9  15 1514.49 294.962   6
  -4   9  15 1231.79 223.241   1
  -4   9  16 4603.70 426.226   1
  -4   9  16 5871.49 569.952   6
  -4   9  17 4730.53 456.876   1
  -4   9  17 5880.20 572.573   6
  -4   9  18 6730.46 558.005   1
  -4   9  18 7874.21 667.211   6
  -4   9  19 2801.55 386.299   1
  -4   9  19 2936.71 435.299   6
  -4   9  20 898.449 285.340   6
  -4   9  20 415.911 190.975   1
  -4  10 -16 5720.81 554.482   4
  -4  10 -16 6434.99 497.379   3
  -4  10 -15 3066.04 341.355   3
  -4  10 -14 10602.2 625.451   3
  -4  10 -13 3105.06 345.831   3
  -4  10 -12 19551.2 836.209   3
  -4  10 -11 258.492 161.662   3
  -4  10 -10 9420.55 556.306   3
  -4  10  -9 275.391 141.868   3
  -4  10  -8 4648.19 384.933   3
  -4  10  -7 3305.17 327.147   3
  -4  10  -6 6169.85 439.686   3
  -4  10  -5 6281.71 441.086   3
  -4  10  -4 7805.62 492.032   3
  -4  10  -3 11447.1 592.992   3
  -4  10  -2 12291.9 618.750   3
  -4  10  -1 6958.62 465.599   3
  -4  10   0 97.0823 100.113   3
  -4  10   1 33318.4 1067.97   3
  -4  10   2 867.172 193.308   3
  -4  10   3 40260.5 1214.92   3
  -4  10   4 9074.47 567.070   3
  -4  10   5 10781.0 624.672   3
  -4  10   6 1855.83 270.191   3
  -4  10   7 15028.1 755.904   3
  -4  10   8 8753.04 589.244   3
  -4  10   9 6208.23 384.495   1
  -4  10   9 6442.05 508.305   3
  -4  10  10 21127.6 932.065   3
  -4  10  10 18856.8 710.627   1
  -4  10  11 56.0579 99.7881   1
  -4  10  12 13800.1 651.846   1
  -4  10  12 15732.9 863.295   6
  -4  10  13 417.083 137.785   1
  -4  10  13 758.023 228.477   6
  -4  10  14 9427.21 575.681   1
  -4  10  14 10923.7 752.118   6
  -4  10  15 3662.86 449.462   6
  -4  10  15 3246.45 369.525   1
  -4  10  16 9282.92 723.454   6
  -4  10  17 5403.60 570.090   6
  -4  10  18 3238.80 479.555   6
  -4  11 -17 884.463 242.574   4
  -4  11 -16 13471.4 858.634   4
  -4  11 -15 3494.67 374.363   3
  -4  11 -14 10746.1 641.987   3
  -4  11 -13 354.177 175.132   3
  -4  11 -12 10975.9 639.858   3
  -4  11 -11 928.492 221.638   3
  -4  11 -10 8346.71 548.845   3
  -4  11  -9 3810.80 369.953   3
  -4  11  -8 3092.39 342.642   3
  -4  11  -7 9465.24 574.320   3
  -4  11  -6 2746.05 324.767   3
  -4  11  -5 9499.92 570.645   3
  -4  11  -4 4772.61 410.381   3
  -4  11  -3 17074.6 769.269   3
  -4  11  -2 129.995 140.759   3
  -4  11  -1 3940.36 371.586   3
  -4  11   0 369.110 125.466   3
  -4  11   1 18797.8 834.688   3
  -4  11   2 958.078 189.224   3
  -4  11   3 17707.2 821.026   3
  -4  11   4 2278.68 292.288   3
  -4  11   5 6436.81 504.560   3
  -4  11   6 17699.0 852.652   3
  -4  11   7 8382.21 592.949   3
  -4  11   8 12198.9 718.809   3
  -4  11   9 701.241 211.708   3
  -4  11  10 20472.0 951.926   3
  -4  11  11 450.753 203.883   6
  -4  11  12 10693.7 744.963   6
  -4  11  13 2049.23 345.618   6
  -4  11  14 6995.03 617.442   6
  -4  11  15 6176.69 608.091   6
  -4  11  16 4140.78 499.991   6
  -4  11  17 4926.45 560.415   6
  -4  12 -16 6594.47 613.412   4
  -4  12 -15 769.278 248.473   4
  -4  12 -14 12229.3 702.367   3
  -4  12 -13 710.299 211.604   3
  -4  12 -12 8274.03 574.185   3
  -4  12 -11 6465.89 506.062   3
  -4  12 -10 1243.59 239.232   3
  -4  12  -9 2456.75 331.757   3
  -4  12  -8 2149.06 293.345   3
  -4  12  -7 8706.26 574.259   3
  -4  12  -6 60.5697 117.470   3
  -4  12  -5 11468.2 657.690   3
  -4  12  -4 136.686 130.609   3
  -4  12  -3 11042.6 645.752   3
  -4  12  -2 1679.21 259.555   3
  -4  12  -1 6353.29 499.855   3
  -4  12   0 4753.59 439.653   3
  -4  12   1 4490.14 428.786   3
  -4  12   2 2576.95 338.614   3
  -4  12   3 2343.22 329.176   3
  -4  12   4 12086.1 722.808   3
  -4  12   5 831.185 184.412   3
  -4  12   6 15480.6 830.572   3
  -4  12   7 357.413 178.844   3
  -4  12   8 12651.5 764.729   3
  -4  12   9 528.413 201.083   3
  -4  12  10 10617.1 742.955   6
  -4  12  11 1721.33 331.672   6
  -4  12  12 3129.55 413.276   6
  -4  12  13 8989.18 700.869   6
  -4  12  14 2360.01 387.785   6
  -4  12  15 6255.82 615.503   6
  -4  13 -15 370.607 192.525   4
  -4  13 -14 10093.5 749.511   4
  -4  13 -13 1884.76 318.988   3
  -4  13 -12 4356.34 444.211   3
  -4  13 -11 6940.15 545.844   3
  -4  13 -10 3032.57 371.105   3
  -4  13  -9 16766.8 842.151   3
  -4  13  -8 2189.43 319.164   3
  -4  13  -7 11741.1 701.851   3
  -4  13  -6 3444.42 389.635   3
  -4  13  -5 13455.0 755.343   3
  -4  13  -4 5145.52 471.695   3
  -4  13  -3 6492.74 530.451   3
  -4  13  -2 8041.60 587.622   3
  -4  13  -1 3116.80 376.543   3
  -4  13   0 6120.81 527.442   3
  -4  13   1 2726.12 357.326   3
  -4  13   2 6167.01 538.651   3
  -4  13   3-100.253 169.770   3
  -4  13   4 12549.8 764.386   3
  -4  13   5-253.099 153.450   3
  -4  13   6 10929.3 726.870   3
  -4  13   7 889.308 233.669   3
  -4  13   8 12263.2 792.003   3
  -4  13   9 4374.03 490.993   6
  -4  13  10 3899.55 486.179   6
  -4  13  11 2389.31 384.451   6
  -4  13  12 7489.02 661.675   6
  -4  13  13 10172.5 781.922   6
  -4  13  14 500.760 237.881   6
  -4  14 -12 389.376 191.795   3
  -4  14 -11 9530.66 668.691   3
  -4  14 -10 536.510 180.869   3
  -4  14  -9 12798.7 782.837   3
  -4  14  -8 141.472 175.155   3
  -4  14  -7 7608.79 601.413   3
  -4  14  -6 1425.10 278.640   3
  -4  14  -5 7878.72 611.270   3
  -4  14  -4 5948.50 531.840   3
  -4  14  -3 222.039 178.814   3
  -4  14  -2 9129.55 666.288   3
  -4  14  -1 3103.04 401.197   3
  -4  14   0 7352.64 603.160   3
  -4  14   1 52.1879 144.784   3
  -4  14   2 7805.34 623.350   3
  -4  14   3-168.913 159.401   3
  -4  14   4 10785.8 742.513   3
  -4  14   5 4048.78 467.842   3
  -4  14   6 3785.83 459.784   3
  -4  14   7 3245.24 438.656   3
  -4  14   7 3359.95 447.339   6
  -4  14   8 6237.00 602.937   6
  -4  14   9 3848.36 481.518   6
  -4  14  10 4125.29 500.212   6
  -4  14  11 3940.02 495.685   6
  -4  14  12 738.795 231.270   6
  -4  15 -11 8721.65 674.646   3
  -4  15 -10 71.0210 170.515   3
  -4  15  -9 7681.13 633.245   3
  -4  15  -8 1251.90 292.566   3
  -4  15  -7 5495.17 531.254   3
  -4  15  -6 3592.04 452.363   3
  -4  15  -5 785.824 226.092   3
  -4  15  -4 4435.50 496.053   3
  -4  15  -3 2390.33 389.087   3
  -4  15  -2 12990.2 828.056   3
  -4  15  -1 99.6115 152.427   3
  -4  15   0 13128.9 833.710   3
  -4  15   1 636.557 212.708   3
  -4  15   2 12309.6 813.991   3
  -4  15   3 5506.58 557.930   3
  -4  15   4 4264.19 488.981   3
  -4  15   5 2598.45 407.251   3
  -4  15   5 2659.12 397.340   6
  -4  15   6-32.9583 193.435   3
  -4  15   6 421.186 211.470   6
  -4  15   7 3570.64 460.505   6
  -4  15   8 420.952 169.567   6
  -4  15   9 3469.78 468.982   6
  -4  16  -9 7465.20 653.871   3
  -4  16  -8 3870.69 464.502   3
  -4  16  -7 4104.94 520.808   3
  -4  16  -6 4324.95 514.591   3
  -4  16  -5 1953.08 374.375   3
  -4  16  -4 9988.63 767.824   3
  -4  16  -3 1059.94 313.096   3
  -4  16  -2 5211.61 549.029   3
  -4  16  -1 1014.45 263.598   3
  -4  16   0 5428.97 560.728   3
  -4  16   1-32.8502 171.305   3
  -4  16   2 2662.79 421.878   3
  -4  16   3 2649.77 432.332   3
  -4  16   3 2431.01 363.740   6
  -4  16   4 39.4562 175.225   3
  -4  16   4 336.582 201.936   6
  -4  16   5 6910.67 645.058   6
  -4  16   6 1258.86 271.112   6
  -4  17   0 462.347 248.640   6
  -4  17   1 3569.68 465.830   6
  -4  17   2 19.0341 184.604   6
  -4  17   3 9041.68 746.116   6
  -3 -14  -5 6333.33 553.250   5
  -3 -14  -4 493.229 227.093   5
  -3 -14  -3 8106.05 627.974   5
  -3 -14  -2 3867.76 443.828   5
  -3 -14  -1 3085.33 409.104   5
  -3 -14   0 592.847 235.932   5
  -3 -14   1 647.045 214.403   5
  -3 -14   2 4437.16 500.127   5
  -3 -14   3 601.730 240.064   5
  -3 -14   4 4322.06 484.919   5
  -3 -14   5 229.964 203.502   5
  -3 -14   6 2824.33 434.252   5
  -3 -13  -6 500.721 192.903   5
  -3 -13  -5 4852.58 463.758   5
  -3 -13  -4 3901.37 407.446   5
  -3 -13  -3 4574.79 465.818   5
  -3 -13  -2 4725.34 469.932   5
  -3 -13  -1 1546.48 323.482   5
  -3 -13   0 4729.84 484.678   5
  -3 -13   1 434.215 225.628   5
  -3 -13   2 4817.01 496.621   5
  -3 -13   3 273.035 217.050   5
  -3 -13   4 3698.76 450.427   5
  -3 -13   5 1054.41 296.754   5
  -3 -13   6 2889.56 414.685   5
  -3 -13   7 5181.13 565.734   5
  -3 -13   8 1485.21 333.963   5
  -3 -13   9 1896.75 383.957   5
  -3 -13  10 464.370 228.961   5
  -3 -12 -12 976.008 280.216   2
  -3 -12 -11 7234.75 604.210   2
  -3 -12 -10 472.142 239.470   2
  -3 -12  -9 7138.01 569.079   2
  -3 -12  -8 1289.67 257.468   2
  -3 -12  -7 4583.14 429.412   5
  -3 -12  -7 4958.31 457.539   2
  -3 -12  -6 2849.71 362.848   5
  -3 -12  -6 2407.77 295.837   2
  -3 -12  -5 3963.15 403.352   5
  -3 -12  -5 4132.21 383.281   2
  -3 -12  -4 4096.27 369.419   2
  -3 -12  -4 4560.78 435.333   5
  -3 -12  -3 1343.92 263.577   5
  -3 -12  -2 8951.86 599.399   5
  -3 -12  -1 993.938 250.653   5
  -3 -12   0 12452.0 738.425   5
  -3 -12   1 221.975 173.359   5
  -3 -12   2 8522.09 637.574   5
  -3 -12   3 1584.22 289.762   5
  -3 -12   4 3260.61 418.918   5
  -3 -12   5 6899.98 590.685   5
  -3 -12   6 3748.31 449.826   5
  -3 -12   7 8141.38 683.457   5
  -3 -12   7 7413.03 588.482   1
  -3 -12   8 349.701 191.099   5
  -3 -12   8-402.768 201.259   1
  -3 -12   9 7613.67 661.787   5
  -3 -12   9 7514.49 603.341   1
  -3 -12  10 331.107 166.767   1
  -3 -12  10-23.6234 232.200   5
  -3 -12  11 2998.04 443.927   5
  -3 -12  12-458.961 303.280   5
  -3 -12  13 3988.68 555.731   5
  -3 -11 -13 915.886 274.413   2
  -3 -11 -12 265.890 185.329   2
  -3 -11 -11 7481.83 614.760   2
  -3 -11 -10 817.899 251.082   2
  -3 -11  -9 6982.20 556.388   2
  -3 -11  -8 2730.27 318.184   5
  -3 -11  -8 2410.00 335.575   2
  -3 -11  -7 8452.49 545.534   5
  -3 -11  -7 7599.95 537.815   2
  -3 -11  -6 4180.67 392.442   5
  -3 -11  -6 3758.07 358.598   2
  -3 -11  -5 1474.52 242.296   5
  -3 -11  -5 2118.28 271.868   2
  -3 -11  -4 7300.12 474.581   2
  -3 -11  -4 8031.80 538.668   5
  -3 -11  -3 419.379 156.415   5
  -3 -11  -3 349.650 115.854   2
  -3 -11  -2 13018.0 703.949   5
  -3 -11  -2 11897.6 582.136   2
  -3 -11  -1 198.447 130.819   2
  -3 -11  -1 304.787 165.763   5
  -3 -11   0 20443.1 914.475   5
  -3 -11   0 19491.1 726.481   2
  -3 -11   1 2279.77 334.532   5
  -3 -11   1 2430.96 254.545   2
  -3 -11   2 8098.05 593.406   5
  -3 -11   3 9920.15 669.329   5
  -3 -11   4 1785.98 301.437   5
  -3 -11   5 5116.09 496.989   5
  -3 -11   6 1424.17 288.325   5
  -3 -11   7 9202.04 682.992   5
  -3 -11   7 8001.75 598.682   1
  -3 -11   8-226.881 188.393   5
  -3 -11   8-355.940 195.411   1
  -3 -11   9 8072.07 651.740   5
  -3 -11   9 7896.55 571.220   1
  -3 -11  10 1003.30 317.768   5
  -3 -11  10 486.178 167.962   1
  -3 -11  11 6525.65 604.870   5
  -3 -11  11 6763.77 545.753   1
  -3 -11  12 1889.60 369.759   5
  -3 -11  12 2105.69 318.801   1
  -3 -11  13 2976.68 449.216   5
  -3 -11  13 2612.70 352.583   1
  -3 -11  14 2958.46 464.650   5
  -3 -11  15 165.419 181.333   5
  -3 -10 -14-87.2550 198.736   2
  -3 -10 -13 6161.40 580.672   2
  -3 -10 -12 2757.53 389.168   2
  -3 -10 -11 3479.36 432.565   2
  -3 -10 -10 2112.44 338.488   2
  -3 -10  -9 5034.91 457.128   2
  -3 -10  -8 4807.29 397.025   5
  -3 -10  -8 4597.46 424.841   2
  -3 -10  -7 1981.48 263.557   5
  -3 -10  -7 2061.44 279.913   2
  -3 -10  -6 11261.6 597.505   5
  -3 -10  -6 10511.8 598.700   2
  -3 -10  -5 723.400 203.560   5
  -3 -10  -5 586.735 168.773   2
  -3 -10  -4 18340.0 785.377   5
  -3 -10  -4 17737.0 743.857   2
  -3 -10  -3 275.116 131.509   2
  -3 -10  -3 328.845 167.192   5
  -3 -10  -2 18237.3 714.397   2
  -3 -10  -2 17864.8 794.223   5
  -3 -10  -1 4220.87 398.726   5
  -3 -10  -1 3814.78 319.466   2
  -3 -10   0 19192.0 846.922   5
  -3 -10   0 20600.2 740.095   2
  -3 -10   1 11395.6 534.247   2
  -3 -10   1 11404.5 661.531   5
  -3 -10   2 1958.54 231.652   2
  -3 -10   2 1610.22 273.163   5
  -3 -10   3 6928.83 533.766   5
  -3 -10   3 8537.71 456.672   2
  -3 -10   4 3727.57 398.284   5
  -3 -10   4 3823.77 297.762   2
  -3 -10   5 12165.5 720.722   5
  -3 -10   5 13825.3 570.527   2
  -3 -10   6 1654.48 275.012   5
  -3 -10   7 7071.74 572.897   5
  -3 -10   8 3896.19 425.346   5
  -3 -10   8 3408.56 363.181   1
  -3 -10   9 10505.7 637.191   1
  -3 -10   9 10730.7 718.762   5
  -3 -10  10 10140.0 705.300   5
  -3 -10  10 8187.68 578.734   1
  -3 -10  11 9829.94 708.277   5
  -3 -10  11 9122.17 617.755   1
  -3 -10  12 7117.88 622.456   5
  -3 -10  12 6590.16 531.299   1
  -3 -10  13 2746.17 413.115   5
  -3 -10  13 2286.78 327.199   1
  -3 -10  14 7369.95 646.942   5
  -3 -10  14 6164.48 512.636   1
  -3 -10  15 153.439 123.693   1
  -3 -10  15 141.075 172.766   5
  -3 -10  16 8156.59 703.425   5
  -3 -10  16 6595.49 546.163   1
  -3 -10  17-42.6498 186.925   5
  -3  -9 -15 6865.41 627.469   2
  -3  -9 -14 1168.81 305.449   2
  -3  -9 -13 4503.32 499.445   2
  -3  -9 -12 4548.98 491.907   2
  -3  -9 -11 974.248 241.460   2
  -3  -9 -10 5962.09 514.968   2
  -3  -9  -9 2.51367 129.384   5
  -3  -9  -9 26.4082 136.474   2
  -3  -9  -8 13186.0 613.811   5
  -3  -9  -8 12334.6 688.166   2
  -3  -9  -7-94.2310 116.305   2
  -3  -9  -7-161.187 137.966   5
  -3  -9  -6 14855.3 663.493   5
  -3  -9  -6 15261.1 723.923   2
  -3  -9  -5 163.391 165.197   5
  -3  -9  -5 430.295 140.676   2
  -3  -9  -4 13067.3 638.174   5
  -3  -9  -4 13585.1 636.538   2
  -3  -9  -3-72.8061 141.094   5
  -3  -9  -3 100.010 93.4776   2
  -3  -9  -2 6606.26 457.238   5
  -3  -9  -2 6786.28 428.956   2
  -3  -9  -1 1010.28 217.050   5
  -3  -9  -1 689.370 149.408   2
  -3  -9   0 17828.6 783.082   5
  -3  -9   0 19697.2 710.510   2
  -3  -9   1 22799.6 900.825   5
  -3  -9   1 25752.9 810.064   2
  -3  -9   2 4156.50 377.552   5
  -3  -9   2 4841.70 335.546   2
  -3  -9   3 15245.4 607.136   2
  -3  -9   3 12190.8 673.682   5
  -3  -9   4 957.227 221.718   5
  -3  -9   4 614.389 141.810   2
  -3  -9   5 18657.1 847.538   5
  -3  -9   5 20240.9 702.418   2
  -3  -9   6-8.13370 171.091   5
  -3  -9   7 7404.53 547.616   5
  -3  -9   8 14357.7 761.908   5
  -3  -9   8 13463.0 706.883   1
  -3  -9   9 15438.0 809.791   5
  -3  -9   9 13346.8 709.166   1
  -3  -9  10 11873.8 715.160   5
  -3  -9  10 11144.0 648.950   1
  -3  -9  11 3238.60 362.795   1
  -3  -9  11 4217.02 448.921   5
  -3  -9  12 4851.96 468.013   5
  -3  -9  12 4415.47 415.704   1
  -3  -9  13 205.902 139.886   1
  -3  -9  13 117.300 183.891   5
  -3  -9  14 5477.21 511.022   5
  -3  -9  14 4605.23 433.023   1
  -3  -9  15 69.0008 124.785   1
  -3  -9  15 133.540 213.940   5
  -3  -9  16 6082.81 571.009   5
  -3  -9  16 5023.68 471.336   1
  -3  -9  17 321.595 154.844   1
  -3  -9  18 4703.75 484.766   1
  -3  -9  19 2731.34 420.684   1
  -3  -8 -16 4313.35 523.507   2
  -3  -8 -15 2318.76 363.585   2
  -3  -8 -14 4551.48 516.548   2
  -3  -8 -13 369.253 189.713   2
  -3  -8 -12 10211.9 716.049   2
  -3  -8 -11 538.314 163.836   2
  -3  -8 -10 7321.55 426.682   5
  -3  -8 -10 6668.83 547.704   2
  -3  -8  -9 91.4349 107.985   5
  -3  -8  -9-167.382 136.586   2
  -3  -8  -8 4489.48 416.489   2
  -3  -8  -8 4683.02 346.517   5
  -3  -8  -7 2249.21 255.991   5
  -3  -8  -7 2583.25 307.286   2
  -3  -8  -6 24293.9 816.222   5
  -3  -8  -6 25513.9 933.778   2
  -3  -8  -5 2857.91 284.367   5
  -3  -8  -5 2919.93 304.253   2
  -3  -8  -4 9818.33 522.525   5
  -3  -8  -4 11361.3 578.910   2
  -3  -8  -3 2550.41 265.438   5
  -3  -8  -3 2852.79 284.027   2
  -3  -8  -2 1530.24 219.748   5
  -3  -8  -2 1945.11 237.868   2
  -3  -8  -1 13368.9 629.137   5
  -3  -8  -1 14547.6 612.529   2
  -3  -8   0 178.386 98.1492   2
  -3  -8   0 157.479 120.430   5
  -3  -8   1 11419.1 588.617   5
  -3  -8   1 13568.1 574.101   2
  -3  -8   2 549.215 161.746   5
  -3  -8   2 886.905 164.201   2
  -3  -8   3 28836.3 845.711   2
  -3  -8   3 27701.5 954.578   5
  -3  -8   4 248.295 101.982   2
  -3  -8   4 539.668 190.162   5
  -3  -8   5 20182.2 697.114   2
  -3  -8   5 20958.9 849.064   5
  -3  -8   6 4661.59 337.653   2
  -3  -8   6 4773.68 406.511   5
  -3  -8   7 16575.1 766.160   5
  -3  -8   8 5436.89 425.560   1
  -3  -8   8 6171.21 469.838   5
  -3  -8   9 677.168 154.286   1
  -3  -8   9 1023.04 223.285   5
  -3  -8  10 18643.9 837.031   5
  -3  -8  10 17515.4 784.538   1
  -3  -8  11 97.1263 129.996   1
  -3  -8  11 110.915 152.196   5
  -3  -8  12 12227.6 670.265   1
  -3  -8  12 13278.1 723.233   5
  -3  -8  13 1617.36 289.254   5
  -3  -8  13 1294.28 243.993   1
  -3  -8  14 6733.78 543.932   5
  -3  -8  14 6661.86 505.707   1
  -3  -8  15 871.440 236.573   5
  -3  -8  15 612.381 180.947   1
  -3  -8  16 10295.1 660.721   1
  -3  -8  17 8140.10 603.041   1
  -3  -8  18 1242.39 268.213   1
  -3  -8  19 4771.39 493.954   1
  -3  -8  20 635.923 214.277   1
  -3  -8  21 2921.07 416.333   1
  -3  -7 -17 2182.79 392.995   2
  -3  -7 -16 11792.6 862.297   2
  -3  -7 -15 3156.93 434.015   2
  -3  -7 -14 12943.3 849.247   2
  -3  -7 -13 92.3786 175.078   2
  -3  -7 -12 5894.63 549.322   2
  -3  -7 -11 92.5267 155.296   2
  -3  -7 -10 6380.95 368.423   5
  -3  -7 -10 6809.18 539.934   2
  -3  -7  -9 1866.20 212.744   5
  -3  -7  -9 2085.70 307.906   2
  -3  -7  -8 7483.44 407.818   5
  -3  -7  -8 7238.09 521.788   2
  -3  -7  -7 22643.0 897.339   2
  -3  -7  -7 20700.2 701.736   5
  -3  -7  -6 20979.3 704.074   5
  -3  -7  -6 21530.8 849.082   2
  -3  -7  -5 4595.72 335.764   5
  -3  -7  -5 4442.88 375.335   2
  -3  -7  -4 1025.30 174.116   5
  -3  -7  -4 1416.32 222.139   2
  -3  -7  -3 19122.6 729.231   2
  -3  -7  -3 16435.2 637.233   5
  -3  -7  -2 10.6178 100.953   5
  -3  -7  -2 41.3529 88.7272   2
  -3  -7  -1 27490.2 850.080   2
  -3  -7  -1 25036.2 814.261   5
  -3  -7   0 669.194 145.990   2
  -3  -7   0 637.372 147.246   5
  -3  -7   1 20353.8 744.044   5
  -3  -7   1 21762.4 730.332   2
  -3  -7   2 294.097 127.521   2
  -3  -7   2 255.016 138.473   5
  -3  -7   3 19693.7 679.491   2
  -3  -7   3 20869.0 760.056   5
  -3  -7   4 3668.44 332.186   5
  -3  -7   4 3718.48 289.609   2
  -3  -7   5 9680.40 526.770   5
  -3  -7   5 9462.95 460.785   2
  -3  -7   6 8039.98 477.859   5
  -3  -7   6 8012.44 363.066   3
  -3  -7   6 7329.50 408.027   2
  -3  -7   7 7245.95 461.838   5
  -3  -7   7 6786.65 308.474   3
  -3  -7   8 10224.6 553.419   5
  -3  -7   8 9713.22 549.399   1
  -3  -7   9 1918.92 249.545   1
  -3  -7   9 2119.42 276.085   5
  -3  -7  10 27686.5 969.326   5
  -3  -7  10 27696.2 958.252   1
  -3  -7  11 59.2896 104.632   1
  -3  -7  11 318.268 147.205   5
  -3  -7  12 27634.4 1005.46   5
  -3  -7  12 28884.4 1010.63   1
  -3  -7  13 9071.00 581.771   5
  -3  -7  13 8323.05 543.591   1
  -3  -7  14 5530.26 470.438   5
  -3  -7  14 4933.55 433.143   1
  -3  -7  15 9922.70 616.849   1
  -3  -7  15 9022.44 613.302   5
  -3  -7  16 7918.93 567.845   1
  -3  -7  17 8355.99 588.364   1
  -3  -7  18 269.793 134.543   1
  -3  -7  19 6325.32 541.087   1
  -3  -7  20-140.522 145.394   1
  -3  -7  21 4323.40 466.809   1
  -3  -7  22-58.8898 163.592   1
  -3  -6 -18 6139.28 660.545   2
  -3  -6 -17 2590.34 424.060   2
  -3  -6 -16 18950.8 1074.09   2
  -3  -6 -15 620.280 230.369   2
  -3  -6 -14 8260.23 683.115   2
  -3  -6 -13 609.110 201.534   2
  -3  -6 -12 11675.3 760.702   2
  -3  -6 -11 3172.31 394.634   2
  -3  -6 -10 8155.61 585.874   2
  -3  -6 -10 8027.29 393.442   5
  -3  -6  -9 15140.8 776.396   2
  -3  -6  -9 14525.5 533.371   5
  -3  -6  -8 3256.25 257.027   5
  -3  -6  -8 3650.15 376.712   2
  -3  -6  -7 12053.8 488.603   5
  -3  -6  -7 12814.6 671.753   2
  -3  -6  -6 248.103 139.170   2
  -3  -6  -6 318.787 120.757   5
  -3  -6  -5 42505.7 1178.35   2
  -3  -6  -5 38154.0 931.716   5
  -3  -6  -4 234.975 132.857   5
  -3  -6  -4 193.874 136.396   2
  -3  -6  -3 14979.3 561.214   5
  -3  -6  -3 17332.4 691.081   2
  -3  -6  -2 748.663 150.635   5
  -3  -6  -2 769.649 160.213   2
  -3  -6  -1 22138.5 702.543   5
  -3  -6  -1 23761.1 785.377   2
  -3  -6   0 133.396 102.472   5
  -3  -6   0 245.371 107.139   2
  -3  -6   1 14370.6 580.542   2
  -3  -6   1 15004.3 581.309   5
  -3  -6   2 8411.80 437.668   5
  -3  -6   2 8147.65 357.369   6
  -3  -6   2 8479.44 434.465   2
  -3  -6   3 12454.6 538.542   5
  -3  -6   3 11454.9 399.115   6
  -3  -6   3 11120.4 492.090   2
  -3  -6   4 27904.5 834.654   5
  -3  -6   4 26523.8 686.317   3
  -3  -6   4 25365.3 762.009   2
  -3  -6   5 7905.57 442.192   5
  -3  -6   5 8215.20 353.738   3
  -3  -6   5 7978.76 414.721   2
  -3  -6   6 27135.6 845.436   5
  -3  -6   6 25940.2 774.540   2
  -3  -6   6 26874.0 639.682   3
  -3  -6   7 675.608 93.0561   3
  -3  -6   7 827.793 163.009   5
  -3  -6   8 15769.7 665.468   1
  -3  -6   8 15469.2 642.293   5
  -3  -6   9-69.8000 122.508   5
  -3  -6   9 17.5740 90.2497   1
  -3  -6  10 21081.4 796.224   1
  -3  -6  10 20092.1 777.676   5
  -3  -6  11 4034.89 355.867   5
  -3  -6  11 4518.87 372.793   1
  -3  -6  12 11075.3 594.806   1
  -3  -6  12 11019.1 595.898   5
  -3  -6  13 9478.07 574.448   5
  -3  -6  13 8758.30 536.377   1
  -3  -6  14 12693.5 658.866   1
  -3  -6  15 16455.6 774.793   1
  -3  -6  16 678.461 185.172   1
  -3  -6  17 11434.9 672.420   1
  -3  -6  18 185.837 119.488   1
  -3  -6  19 13485.2 767.091   1
  -3  -6  20 285.804 154.994   1
  -3  -6  21 4532.23 472.510   1
  -3  -6  22 3758.20 450.927   1
  -3  -6  23 3930.19 469.249   1
  -3  -5 -19 243.965 232.041   2
  -3  -5 -18 14071.4 974.756   2
  -3  -5 -17 712.706 315.370   2
  -3  -5 -16 15400.6 963.424   2
  -3  -5 -15 50.5197 174.929   2
  -3  -5 -14 11733.3 813.211   2
  -3  -5 -13 4920.64 515.283   2
  -3  -5 -12 15137.1 858.411   2
  -3  -5 -11 14482.8 805.850   2
  -3  -5 -11 14167.1 480.001   5
  -3  -5 -10 10364.1 664.016   2
  -3  -5 -10 10270.1 404.225   5
  -3  -5  -9 26045.0 1020.25   2
  -3  -5  -9 23517.5 636.493   5
  -3  -5  -8 1692.56 184.546   5
  -3  -5  -8 1781.89 274.339   2
  -3  -5  -7 24498.0 933.644   2
  -3  -5  -7 22139.8 615.591   5
  -3  -5  -6 907.585 129.680   5
  -3  -5  -6 1274.34 247.973   2
  -3  -5  -5 48286.4 1257.10   2
  -3  -5  -5 41366.0 897.448   5
  -3  -5  -4 1784.37 181.231   5
  -3  -5  -4 1529.62 236.837   2
  -3  -5  -3 22018.0 627.438   5
  -3  -5  -3 23427.2 809.127   2
  -3  -5  -2 9121.84 397.456   5
  -3  -5  -2 9823.46 503.508   2
  -3  -5  -1 22354.7 638.711   5
  -3  -5  -1 21773.4 744.978   2
  -3  -5   0 14675.0 520.369   5
  -3  -5   0 14313.2 584.228   2
  -3  -5   1 27372.3 735.200   5
  -3  -5   1 24375.8 760.135   2
  -3  -5   1 25795.1 657.406   6
  -3  -5   2 9774.09 462.292   2
  -3  -5   2 10225.1 373.382   6
  -3  -5   2 11572.3 469.837   5
  -3  -5   3 2407.89 220.326   5
  -3  -5   3 1874.97 210.880   2
  -3  -5   3 2257.95 162.246   6
  -3  -5   4 35026.9 744.107   3
  -3  -5   4 36287.2 898.242   5
  -3  -5   4 34615.6 653.704   6
  -3  -5   4 33487.5 873.018   2
  -3  -5   5 868.354 141.934   2
  -3  -5   5 1172.08 190.077   5
  -3  -5   5 1055.41 98.1133   6
  -3  -5   5 1249.73 131.709   3
  -3  -5   6 17452.4 627.053   5
  -3  -5   6 16257.1 588.651   2
  -3  -5   6 17469.6 455.139   3
  -3  -5   7 984.559 97.0236   3
  -3  -5   7 1185.30 192.722   5
  -3  -5   7 766.509 158.316   1
  -3  -5   8 31632.0 888.501   5
  -3  -5   8 33671.6 937.296   1
  -3  -5   9 571.065 135.603   1
  -3  -5   9 854.443 183.447   5
  -3  -5  10 24246.1 824.835   5
  -3  -5  10 26260.3 861.033   1
  -3  -5  11 5820.51 417.916   5
  -3  -5  11 6164.56 424.345   1
  -3  -5  12 8537.75 500.745   1
  -3  -5  12 8278.06 490.414   5
  -3  -5  13 22743.3 852.606   1
  -3  -5  14 5313.12 417.157   1
  -3  -5  15 16421.0 749.601   1
  -3  -5  16-80.0662 122.485   1
  -3  -5  17 18791.8 847.652   1
  -3  -5  18 335.177 162.265   1
  -3  -5  19 14863.1 789.240   1
  -3  -5  20 2746.57 363.124   1
  -3  -5  21 6430.49 557.648   1
  -3  -5  22 7544.33 612.738   1
  -3  -5  23 942.850 254.776   1
  -3  -4 -19 1995.06 449.452   2
  -3  -4 -18 7771.62 754.948   2
  -3  -4 -17-192.598 211.821   2
  -3  -4 -16 10512.5 810.059   2
  -3  -4 -15 1343.28 332.751   2
  -3  -4 -14 12941.5 832.488   2
  -3  -4 -13 17832.2 953.712   2
  -3  -4 -12 10443.1 702.745   2
  -3  -4 -11 24875.0 1071.20   2
  -3  -4 -11 24773.9 580.267   5
  -3  -4 -10 6187.91 525.736   2
  -3  -4 -10 5875.07 269.146   5
  -3  -4  -9 26859.3 1043.42   2
  -3  -4  -9 25725.6 592.689   5
  -3  -4  -8 3180.63 205.604   5
  -3  -4  -8 3419.12 366.458   2
  -3  -4  -7 18967.7 497.520   5
  -3  -4  -7 20614.6 851.959   2
  -3  -4  -6 7400.00 301.766   5
  -3  -4  -6 7707.75 507.080   2
  -3  -4  -5 20207.8 520.066   5
  -3  -4  -5 20944.3 806.015   2
  -3  -4  -5 19954.0 542.609   4
  -3  -4  -4 17173.9 510.014   4
  -3  -4  -4 17614.5 720.353   2
  -3  -4  -4 17573.5 481.173   5
  -3  -4  -3 6479.29 289.130   5
  -3  -4  -3 6349.28 306.980   4
  -3  -4  -3 6602.01 418.201   2
  -3  -4  -2 7287.58 313.304   5
  -3  -4  -2 7202.01 427.624   2
  -3  -4  -1 38952.0 793.057   5
  -3  -4  -1 35454.3 968.803   2
  -3  -4   0 27445.0 658.160   5
  -3  -4   0 24301.2 758.385   2
  -3  -4   0 26398.2 658.086   6
  -3  -4   1 3392.92 232.370   5
  -3  -4   1 3710.44 218.858   6
  -3  -4   1 3262.73 268.185   2
  -3  -4   2 19052.1 567.229   5
  -3  -4   2 18473.0 480.710   6
  -3  -4   2 18587.5 621.813   2
  -3  -4   3 277.487 108.723   5
  -3  -4   3 164.199 69.0158   2
  -3  -4   3 241.266 63.6059   6
  -3  -4   4 20810.8 622.846   5
  -3  -4   4 20353.0 644.466   2
  -3  -4   4 21604.1 456.522   6
  -3  -4   5 64.5312 73.9251   2
  -3  -4   5 186.851 100.529   5
  -3  -4   5 154.130 54.2692   6
  -3  -4   6 22418.5 687.602   5
  -3  -4   6 22987.3 694.479   2
  -3  -4   6 22708.3 473.193   3
  -3  -4   6 22699.2 390.502   6
  -3  -4   7 7587.84 401.030   5
  -3  -4   7 7442.27 408.333   1
  -3  -4   7 7434.24 218.703   3
  -3  -4   8 31599.3 886.616   1
  -3  -4   8 30321.7 853.315   5
  -3  -4   9 120.114 103.757   5
  -3  -4   9 217.110 95.7151   1
  -3  -4  10 8513.48 467.013   5
  -3  -4  10 9099.86 481.299   1
  -3  -4  11 14112.0 622.213   1
  -3  -4  12 948.465 181.431   1
  -3  -4  13 17627.3 726.956   1
  -3  -4  14 374.029 131.467   1
  -3  -4  15 16108.7 725.986   1
  -3  -4  16 774.802 167.807   1
  -3  -4  17 12530.4 677.048   1
  -3  -4  18 2502.61 321.703   1
  -3  -4  19 7216.32 544.712   1
  -3  -4  20 7243.75 568.491   1
  -3  -4  21 3390.02 412.213   1
  -3  -4  22 9334.91 681.110   1
  -3  -4  23-67.0479 185.680   1
  -3  -3 -20 10410.2 882.782   2
  -3  -3 -19-188.881 235.711   2
  -3  -3 -18 5943.89 661.294   2
  -3  -3 -17 3392.76 487.741   2
  -3  -3 -16 10622.0 807.025   2
  -3  -3 -15 5673.43 576.182   2
  -3  -3 -14 8123.08 664.180   2
  -3  -3 -13 19984.9 999.901   2
  -3  -3 -12 635.048 237.580   2
  -3  -3 -11 44378.7 1433.56   2
  -3  -3 -11 41472.1 683.152   5
  -3  -3 -10 1677.36 113.035   5
  -3  -3 -10 1591.23 293.799   2
  -3  -3  -9 8520.21 584.318   2
  -3  -3  -9 9056.84 268.811   5
  -3  -3  -8 68.3223 48.6286   5
  -3  -3  -8 189.745 159.377   2
  -3  -3  -7 41344.7 724.567   4
  -3  -3  -7 41996.4 672.494   5
  -3  -3  -7 42233.3 1240.95   2
  -3  -3  -6 18228.7 402.140   5
  -3  -3  -6 18396.4 458.705   4
  -3  -3  -6 17752.2 762.655   2
  -3  -3  -5 13865.8 349.149   5
  -3  -3  -5 13009.2 629.350   2
  -3  -3  -5 14287.9 410.816   4
  -3  -3  -4 49935.9 791.541   5
  -3  -3  -4 49942.5 888.580   4
  -3  -3  -4 49378.2 1239.39   2
  -3  -3  -3 1969.91 144.872   5
  -3  -3  -3 2263.62 169.632   4
  -3  -3  -3 1667.59 236.940   2
  -3  -3  -2 78166.6 1231.42   4
  -3  -3  -2 77537.1 1120.31   5
  -3  -3  -1 1358.23 138.162   5
  -3  -3  -1 1386.86 144.154   4
  -3  -3  -1 1091.49 184.405   2
  -3  -3  -1 1615.41 160.498   6
  -3  -3   0 37341.7 730.469   5
  -3  -3   0 36555.3 919.530   2
  -3  -3   0 37695.8 767.092   6
  -3  -3   0 37240.5 802.402   4
  -3  -3   1 2871.29 199.317   5
  -3  -3   1 2757.18 242.604   2
  -3  -3   1 2880.88 187.063   6
  -3  -3   2 39492.2 806.880   5
  -3  -3   2 40215.9 927.518   2
  -3  -3   2 40775.3 739.015   6
  -3  -3   3 1629.04 165.474   5
  -3  -3   3 1797.65 127.982   6
  -3  -3   3 1539.08 179.864   2
  -3  -3   4 14115.2 478.358   5
  -3  -3   4 14656.5 351.904   6
  -3  -3   4 14739.9 524.165   2
  -3  -3   5 6543.70 207.052   6
  -3  -3   5 6403.80 333.336   5
  -3  -3   5 6815.52 353.737   2
  -3  -3   6 18360.6 591.694   5
  -3  -3   6 18351.4 350.587   6
  -3  -3   6 19522.8 637.281   1
  -3  -3   6 18750.7 610.259   2
  -3  -3   7 9778.73 443.111   5
  -3  -3   7 10647.1 470.892   1
  -3  -3   7 9982.79 220.236   6
  -3  -3   7 10191.9 212.387   3
  -3  -3   8 9640.91 457.317   1
  -3  -3   8 9781.12 450.554   5
  -3  -3   8 9230.62 189.678   6
  -3  -3   9 11713.1 209.687   6
  -3  -3   9 13477.2 554.166   1
  -3  -3   9 11221.8 198.033   6
  -3  -3  10 709.523 142.757   1
  -3  -3  11 18703.3 696.395   1
  -3  -3  12 161.790 24.2898   6
  -3  -3  12 87.2505 19.9327   6
  -3  -3  12 264.552 111.881   1
  -3  -3  13 12484.2 231.490   6
  -3  -3  13 21747.8 774.623   1
  -3  -3  14 13.5340 105.043   1
  -3  -3  14 33.9831 28.4696   6
  -3  -3  15 10138.2 567.370   1
  -3  -3  16 4677.86 394.493   1
  -3  -3  17 9217.65 569.149   1
  -3  -3  18 6366.36 491.914   1
  -3  -3  19 6992.10 527.823   1
  -3  -3  20 16475.2 836.380   1
  -3  -3  21 969.392 236.245   1
  -3  -3  22 8139.85 630.566   1
  -3  -3  23 231.504 172.585   1
  -3  -2 -21 493.132 306.696   2
  -3  -2 -20 6478.65 712.208   2
  -3  -2 -19 2603.70 473.364   2
  -3  -2 -18 9680.69 819.297   2
  -3  -2 -17 7616.50 708.328   2
  -3  -2 -16 5932.95 609.326   2
  -3  -2 -15 4928.18 533.789   2
  -3  -2 -14 2917.26 415.669   2
  -3  -2 -13 15377.7 877.314   2
  -3  -2 -12 204.915 167.992   2
  -3  -2 -11 30320.9 1169.13   2
  -3  -2 -10 2926.75 360.912   2
  -3  -2  -9 26068.4 435.763   4
  -3  -2  -9 24414.2 990.829   2
  -3  -2  -8 8436.92 558.271   2
  -3  -2  -8 7267.73 150.837   5
  -3  -2  -8 9265.15 256.755   4
  -3  -2  -7 36273.2 482.195   5
  -3  -2  -7 39934.5 654.386   4
  -3  -2  -7 38311.2 1172.79   2
  -3  -2  -6 27237.6 538.594   4
  -3  -2  -6 25624.4 389.646   5
  -3  -2  -6 25846.9 911.867   2
  -3  -2  -5 273.299 52.2183   5
  -3  -2  -5 258.399 63.1698   4
  -3  -2  -5 259.027 132.543   2
  -3  -2  -4 111869. 1482.26   4
  -3  -2  -4 109677. 1294.14   5
  -3  -2  -3 254.759 136.809   2
  -3  -2  -3 120.772 61.5519   5
  -3  -2  -3 128.608 64.1735   4
  -3  -2  -2 102020. 1421.22   4
  -3  -2  -2 99160.8 1257.93   5
  -3  -2  -1 6586.66 242.049   5
  -3  -2  -1 7389.47 391.049   2
  -3  -2  -1 7622.17 318.849   6
  -3  -2  -1 7195.62 298.363   4
  -3  -2   0 35970.2 667.095   5
  -3  -2   0 37746.8 895.149   2
  -3  -2   0 37429.7 738.243   6
  -3  -2   0 36950.4 758.582   4
  -3  -2   1 5006.74 236.083   5
  -3  -2   1 4945.07 231.982   6
  -3  -2   1 4741.34 255.531   4
  -3  -2   1 5337.37 316.859   2
  -3  -2   2 16872.2 550.188   2
  -3  -2   2 16695.4 462.700   5
  -3  -2   2 17051.0 510.703   4
  -3  -2   2 17324.4 428.897   6
  -3  -2   3 20330.7 540.401   5
  -3  -2   3 21082.9 456.973   6
  -3  -2   3 21098.7 612.501   2
  -3  -2   4 2901.11 215.515   5
  -3  -2   4 2671.96 222.357   2
  -3  -2   4 3152.15 157.005   6
  -3  -2   5 11754.4 436.960   5
  -3  -2   5 12295.4 302.189   6
  -3  -2   5 12180.1 465.515   2
  -3  -2   6 5400.29 318.305   1
  -3  -2   6 5212.13 183.003   6
  -3  -2   7 15381.3 249.299   3
  -3  -2   7 15395.6 329.750   6
  -3  -2   7 16451.9 570.584   1
  -3  -2   8 1531.84 179.637   1
  -3  -2   8 1514.15 95.5361   6
  -3  -2   9 29015.3 825.675   1
  -3  -2  10 2950.71 264.723   1
  -3  -2  10 2639.93 147.739   6
  -3  -2  11 27195.3 829.857   1
  -3  -2  11 25974.2 505.791   6
  -3  -2  12 8475.83 269.839   6
  -3  -2  12 8715.16 473.322   1
  -3  -2  13 10178.4 307.245   6
  -3  -2  13 10494.7 533.566   1
  -3  -2  14 3491.51 323.763   1
  -3  -2  14 3483.34 181.945   6
  -3  -2  15 15132.8 413.054   6
  -3  -2  15 15370.2 684.893   1
  -3  -2  16 2295.55 160.712   6
  -3  -2  16 3207.37 325.349   1
  -3  -2  17 784.282 179.541   1
  -3  -2  18 16549.7 780.836   1
  -3  -2  19 120.452 124.654   1
  -3  -2  20 8875.44 606.050   1
  -3  -2  21 215.036 155.770   1
  -3  -2  22 9553.59 667.418   1
  -3  -2  23 1421.94 294.265   1
  -3  -1 -21 1278.24 327.111   2
  -3  -1 -20 3456.47 510.990   2
  -3  -1 -19 4351.01 569.085   2
  -3  -1 -18 5566.51 614.717   2
  -3  -1 -17 7655.04 696.473   2
  -3  -1 -16 5611.64 583.417   2
  -3  -1 -15 12929.6 842.174   2
  -3  -1 -14-21.6159 163.357   2
  -3  -1 -13 30810.6 1234.10   2
  -3  -1 -12 11100.1 712.795   2
  -3  -1 -11 17799.3 876.834   2
  -3  -1 -10 23860.5 986.214   2
  -3  -1 -10 25496.0 396.620   4
  -3  -1  -9 16757.5 791.779   2
  -3  -1  -9 17239.9 346.206   4
  -3  -1  -8 23115.6 905.787   2
  -3  -1  -8 25314.8 467.909   4
  -3  -1  -7 10623.3 588.073   2
  -3  -1  -7 11670.1 311.126   4
  -3  -1  -6 58882.9 1412.83   2
  -3  -1  -6 63768.5 933.021   4
  -3  -1  -5 23.8900 38.0097   4
  -3  -1  -5 121.006 99.5764   2
  -3  -1  -4 68986.1 1447.70   2
  -3  -1  -4 75426.5 1091.15   4
  -3  -1  -3 1848.26 140.738   4
  -3  -1  -3 1841.48 209.507   2
  -3  -1  -2 46819.4 897.617   6
  -3  -1  -2 46728.2 820.699   4
  -3  -1  -2 45620.1 1025.32   2
  -3  -1  -1 20018.5 520.104   6
  -3  -1  -1 19117.7 602.371   2
  -3  -1  -1 18561.3 482.628   4
  -3  -1   0 10041.8 342.461   6
  -3  -1   0 9531.62 399.492   2
  -3  -1   0 9535.34 342.674   4
  -3  -1   1 85658.7 1226.29   6
  -3  -1   1 86010.6 1403.82   2
  -3  -1   1 84363.7 1293.46   4
  -3  -1   2 58228.4 1034.35   4
  -3  -1   2 60775.0 929.850   6
  -3  -1   2 60544.1 1109.95   2
  -3  -1   3 53445.4 983.090   4
  -3  -1   3 53388.5 1031.49   2
  -3  -1   3 53927.2 833.670   6
  -3  -1   4 55283.8 1025.36   4
  -3  -1   4 55081.7 1068.84   2
  -3  -1   4 54613.9 834.067   6
  -3  -1   5 152954. 2158.57   2
  -3  -1   5 157076. 2154.08   1
  -3  -1   5 152455. 1812.80   6
  -3  -1   6 12547.4 275.088   3
  -3  -1   6 12814.1 475.111   1
  -3  -1   7 24981.7 697.208   1
  -3  -1   7 23303.7 384.909   3
  -3  -1   8 5724.40 337.918   1
  -3  -1   8 5373.54 139.737   3
  -3  -1   9 20767.1 673.452   1
  -3  -1  10 5167.57 337.276   1
  -3  -1  11 11398.1 517.296   1
  -3  -1  11 11341.8 377.355   6
  -3  -1  12 4780.05 243.020   6
  -3  -1  12 4830.89 343.114   1
  -3  -1  13 11512.9 552.379   1
  -3  -1  13 11386.1 390.612   6
  -3  -1  14 6241.87 288.903   6
  -3  -1  14 6798.20 437.897   1
  -3  -1  15 3085.67 314.702   1
  -3  -1  15 3385.29 224.407   6
  -3  -1  16 7067.44 472.395   1
  -3  -1  16 6730.77 320.689   6
  -3  -1  17 254.877 114.458   1
  -3  -1  17 505.075 103.142   6
  -3  -1  18 35561.7 1151.76   1
  -3  -1  18 31400.9 783.681   6
  -3  -1  19-41.4672 138.514   1
  -3  -1  20 14277.1 768.213   1
  -3  -1  21 968.132 239.286   1
  -3  -1  22 4893.30 482.225   1
  -3  -1  23 3795.27 443.631   1
  -3   0 -22 1329.37 393.363   2
  -3   0 -21 2408.74 335.819   8
  -3   0 -21 2127.99 434.459   2
  -3   0 -20 1095.76 241.769   8
  -3   0 -20 1401.29 372.844   2
  -3   0 -19 18120.0 841.826   8
  -3   0 -19 14953.7 1002.60   2
  -3   0 -18 345.616 215.798   2
  -3   0 -18 59.7303 112.371   8
  -3   0 -17 9606.44 562.392   8
  -3   0 -17 8228.99 703.143   2
  -3   0 -16-38.8675 100.532   8
  -3   0 -16-174.164 157.876   2
  -3   0 -15 12717.6 820.152   2
  -3   0 -15 13836.5 631.377   8
  -3   0 -14 18.4850 164.817   2
  -3   0 -14 382.406 132.635   8
  -3   0 -13 16807.7 651.373   8
  -3   0 -13 15006.8 842.303   2
  -3   0 -12 4784.38 330.722   8
  -3   0 -12 4702.77 458.950   2
  -3   0 -11 32396.2 862.426   8
  -3   0 -11 31327.7 1143.24   2
  -3   0 -11 29248.1 471.168   4
  -3   0 -10 18409.7 373.977   4
  -3   0 -10 17884.4 827.519   2
  -3   0  -9 14591.7 719.656   2
  -3   0  -9 15472.8 358.297   4
  -3   0  -8 39886.2 666.072   4
  -3   0  -8 37412.6 1132.03   2
  -3   0  -7 5394.15 216.956   4
  -3   0  -7 4794.91 382.192   2
  -3   0  -6 61685.8 1392.22   2
  -3   0  -6 67205.2 986.412   4
  -3   0  -5 416.924 66.7540   4
  -3   0  -5 425.173 137.896   2
  -3   0  -4 38140.4 958.115   2
  -3   0  -4 39974.7 713.970   4
  -3   0  -3 27554.7 672.044   6
  -3   0  -3 29420.9 592.519   4
  -3   0  -3 26997.2 753.584   2
  -3   0  -2 93001.8 1300.18   4
  -3   0  -2 91018.6 1380.84   6
  -3   0  -2 88839.1 1489.63   2
  -3   0  -1 66148.2 1038.93   4
  -3   0  -1 66194.0 1180.44   2
  -3   0  -1 65909.3 1071.27   6
  -3   0   0 32352.8 650.156   6
  -3   0   0 29641.9 636.820   4
  -3   0   0 31689.7 731.526   2
  -3   0   1 77772.8 1274.93   2
  -3   0   1 79245.2 1149.86   6
  -3   0   1 77818.4 1195.58   4
  -3   0   2 30333.3 721.475   2
  -3   0   2 31339.7 684.202   4
  -3   0   2 30583.5 606.656   6
  -3   0   3 147053. 2013.12   2
  -3   0   3 145748. 1791.90   6
  -3   0   3 145271. 1930.26   4
  -3   0   4 7819.88 341.290   1
  -3   0   4 8215.53 333.972   4
  -3   0   4 8004.83 254.798   3
  -3   0   4 7473.94 345.922   2
  -3   0   5 53652.0 988.216   4
  -3   0   5 54343.7 1024.77   1
  -3   0   5 52982.3 786.104   3
  -3   0   6 9716.67 266.162   3
  -3   0   6 10221.2 418.493   1
  -3   0   7 26859.4 491.647   3
  -3   0   7 27421.4 727.265   1
  -3   0   8 3407.63 255.661   1
  -3   0   8 3471.03 161.954   3
  -3   0   9 16955.5 591.030   1
  -3   0  10 11088.2 488.210   1
  -3   0  11 5146.37 288.999   6
  -3   0  11 5475.09 350.087   1
  -3   0  12 12695.5 557.053   1
  -3   0  12 13043.8 465.558   6
  -3   0  13 3728.35 256.940   6
  -3   0  13 3450.09 304.272   1
  -3   0  14 15625.1 529.203   6
  -3   0  14 15270.7 654.722   1
  -3   0  15-116.896 103.664   1
  -3   0  15 207.621 95.1282   6
  -3   0  16 16076.8 562.138   6
  -3   0  16 16993.2 734.976   1
  -3   0  17 1260.01 214.310   1
  -3   0  17 1454.14 175.155   6
  -3   0  18 12790.1 675.411   1
  -3   0  18 11839.1 506.000   6
  -3   0  19 486.198 129.830   6
  -3   0  19 41.8989 148.053   1
  -3   0  20 8065.11 577.331   1
  -3   0  21 3610.62 407.295   1
  -3   0  22 2654.87 356.788   1
  -3   0  23 9045.79 667.524   1
  -3   1 -22 295.029 176.287   8
  -3   1 -22 696.281 284.041   2
  -3   1 -21 6825.18 710.438   2
  -3   1 -21 7356.51 558.882   8
  -3   1 -20-225.737 159.545   8
  -3   1 -20-457.155 289.231   2
  -3   1 -19 10445.1 620.109   8
  -3   1 -19 9874.41 794.326   2
  -3   1 -18 202.465 188.390   2
  -3   1 -18 179.394 120.826   8
  -3   1 -17 9785.00 553.949   8
  -3   1 -17 8801.92 708.245   2
  -3   1 -16 4884.63 530.168   2
  -3   1 -16 5330.15 398.258   8
  -3   1 -15 6772.84 428.120   8
  -3   1 -15 6020.65 561.855   2
  -3   1 -14 5296.99 504.777   2
  -3   1 -14 5355.80 362.135   8
  -3   1 -13 23426.6 733.309   8
  -3   1 -13 22010.6 984.856   2
  -3   1 -12 565.999 76.3628   4
  -3   1 -12 515.326 116.992   8
  -3   1 -12 447.269 165.738   2
  -3   1 -11 5549.44 214.077   4
  -3   1 -11 5512.17 466.059   2
  -3   1 -11 5756.19 330.923   8
  -3   1 -10 14806.8 716.564   2
  -3   1 -10 14732.0 371.190   4
  -3   1 -10 14648.3 517.398   8
  -3   1  -9 142.970 93.8420   8
  -3   1  -9 9.47842 115.072   2
  -3   1  -9 131.271 62.0173   4
  -3   1  -8 52142.3 1295.56   2
  -3   1  -8 52409.8 840.825   4
  -3   1  -7 2396.56 152.775   4
  -3   1  -7 2315.17 258.115   2
  -3   1  -6 70265.6 1047.10   4
  -3   1  -6 70993.8 1418.31   2
  -3   1  -5 8245.54 287.046   4
  -3   1  -5 8198.78 411.612   2
  -3   1  -4 76553.9 1360.18   2
  -3   1  -4 75592.2 1117.32   4
  -3   1  -3 43959.4 773.446   4
  -3   1  -3 44098.6 928.472   2
  -3   1  -3 43612.7 860.045   6
  -3   1  -2 15996.6 498.432   2
  -3   1  -2 16161.2 465.671   6
  -3   1  -2 15992.8 427.856   4
  -3   1  -1 70718.2 1080.90   4
  -3   1  -1 69651.2 1105.29   6
  -3   1  -1 68137.2 1159.06   2
  -3   1   0 1151.71 137.277   2
  -3   1   0 1164.62 121.738   4
  -3   1   0 1190.66 116.941   6
  -3   1   1 44851.6 872.474   2
  -3   1   1 45694.1 827.617   4
  -3   1   1 46232.3 803.733   6
  -3   1   2 216.669 93.0916   2
  -3   1   2 157.133 50.0634   4
  -3   1   3 175690. 2090.87   3
  -3   1   3 174768. 2289.42   2
  -3   1   3 174096. 2205.71   4
  -3   1   4 5701.66 247.722   3
  -3   1   4 6474.79 307.863   4
  -3   1   4 5908.83 330.951   2
  -3   1   4 5761.78 305.537   1
  -3   1   5 19185.3 435.202   3
  -3   1   5 19020.1 521.543   4
  -3   1   5 19704.2 550.304   1
  -3   1   6 31041.9 702.347   4
  -3   1   6 32000.2 755.219   1
  -3   1   6 31052.5 586.632   3
  -3   1   7 8376.31 379.018   1
  -3   1   7 8398.72 288.082   3
  -3   1   8 32264.1 803.731   1
  -3   1   8 30710.2 637.154   3
  -3   1   9 22558.9 530.099   3
  -3   1   9 22507.8 680.394   1
  -3   1  10 27529.8 784.976   1
  -3   1  11 4678.83 324.800   1
  -3   1  11 4810.52 306.146   6
  -3   1  12 25466.4 805.270   1
  -3   1  12 26717.0 762.841   6
  -3   1  13 120.479 100.255   1
  -3   1  13 289.822 125.330   6
  -3   1  14 21553.7 778.233   1
  -3   1  14 22420.6 706.055   6
  -3   1  15 3949.50 341.796   1
  -3   1  15 4153.21 303.156   6
  -3   1  16 7703.80 421.485   6
  -3   1  16 7695.49 491.563   1
  -3   1  17 5144.73 417.793   1
  -3   1  17 5723.76 368.334   6
  -3   1  18 476.758 131.870   6
  -3   1  18-24.2664 144.755   1
  -3   1  19 424.409 117.874   6
  -3   1  19 150.915 109.295   1
  -3   1  20 3176.29 368.765   1
  -3   1  20 3125.75 297.355   6
  -3   1  21 6963.41 553.795   1
  -3   1  22 1181.07 283.095   1
  -3   1  23 5695.55 528.217   1
  -3   2 -22-658.952 292.787   2
  -3   2 -21 6666.15 669.591   2
  -3   2 -21 7061.28 538.021   8
  -3   2 -20 426.499 156.039   8
  -3   2 -20 759.756 255.865   2
  -3   2 -19 5569.31 445.006   8
  -3   2 -19 5152.07 577.530   2
  -3   2 -18 4411.11 377.496   8
  -3   2 -18 3970.95 489.998   2
  -3   2 -17 8045.27 653.158   2
  -3   2 -17 8022.55 488.791   8
  -3   2 -16 5784.60 530.305   2
  -3   2 -16 5476.20 387.846   8
  -3   2 -15 3957.93 448.779   2
  -3   2 -15 4682.66 345.071   8
  -3   2 -14 11233.6 502.262   8
  -3   2 -14 11266.5 699.724   2
  -3   2 -13 5801.12 350.786   8
  -3   2 -13 5290.26 482.612   2
  -3   2 -12 12670.5 490.161   8
  -3   2 -12 12997.9 684.407   2
  -3   2 -12 11680.1 349.895   5
  -3   2 -12 11333.4 363.042   4
  -3   2 -11 311.075 63.3552   5
  -3   2 -11 222.415 78.3614   8
  -3   2 -11 309.684 73.1513   4
  -3   2 -11 286.535 119.633   2
  -3   2 -10 22104.7 610.461   8
  -3   2 -10 22071.4 837.255   2
  -3   2 -10 20879.1 393.772   5
  -3   2 -10 21050.0 515.466   4
  -3   2  -9 1117.55 141.906   8
  -3   2  -9 1117.91 118.927   4
  -3   2  -9 1405.24 213.773   2
  -3   2  -8 44777.3 859.208   8
  -3   2  -8 46081.8 1137.59   2
  -3   2  -8 43337.1 795.955   4
  -3   2  -7 8293.60 306.306   4
  -3   2  -7 8982.67 451.587   2
  -3   2  -7 8475.43 351.530   1
  -3   2  -6 9962.63 449.344   2
  -3   2  -6 9149.55 352.779   1
  -3   2  -6 9440.02 330.157   4
  -3   2  -5 2317.72 165.305   4
  -3   2  -5 2642.17 223.422   2
  -3   2  -4 46622.5 903.306   7
  -3   2  -4 44644.6 815.136   4
  -3   2  -4 47205.1 942.825   2
  -3   2  -3 35819.5 704.302   4
  -3   2  -3 36967.2 781.294   2
  -3   2  -3 36342.0 766.874   7
  -3   2  -3 36936.5 767.007   6
  -3   2  -2 16451.7 477.875   2
  -3   2  -2 16175.1 438.754   4
  -3   2  -2 16034.2 473.949   7
  -3   2  -2 16416.5 470.394   6
  -3   2  -1 83220.7 1228.49   4
  -3   2  -1 79907.3 1253.21   2
  -3   2  -1 82167.0 1241.85   6
  -3   2   0 124.268 71.0479   2
  -3   2   0 108.924 57.3333   4
  -3   2   0 150.694 57.6852   6
  -3   2   1 131590. 1813.67   2
  -3   2   1 133619. 1761.64   3
  -3   2   1 138720. 1793.41   4
  -3   2   2 12183.4 373.093   3
  -3   2   2 11960.4 405.140   2
  -3   2   2 12280.0 390.529   4
  -3   2   3 55130.2 930.600   1
  -3   2   3 55004.3 955.998   4
  -3   2   3 53694.0 897.436   3
  -3   2   3 53282.1 989.732   2
  -3   2   4 39391.6 778.123   1
  -3   2   4 38306.9 774.885   4
  -3   2   4 38284.3 717.175   3
  -3   2   5 44821.4 857.343   4
  -3   2   5 44474.8 872.091   1
  -3   2   5 43584.1 783.342   3
  -3   2   6 61705.6 1110.13   1
  -3   2   6 62344.7 1076.57   4
  -3   2   6 62103.9 1005.99   3
  -3   2   7 16806.6 536.631   1
  -3   2   7 16846.2 476.452   3
  -3   2   8 51693.4 967.211   3
  -3   2   8 52451.8 1062.58   1
  -3   2   9 14250.1 525.456   1
  -3   2   9 13866.6 461.339   3
  -3   2  10 17289.1 606.239   1
  -3   2  11 3422.82 283.553   1
  -3   2  12 17440.6 652.904   6
  -3   2  12 17157.7 648.591   1
  -3   2  13 3849.03 313.885   1
  -3   2  13 4254.84 331.976   6
  -3   2  14 12324.2 583.450   1
  -3   2  14 12752.4 572.842   6
  -3   2  15 10555.2 559.831   1
  -3   2  15 11200.4 544.196   6
  -3   2  16 2819.41 296.688   1
  -3   2  16 2811.25 279.187   6
  -3   2  17 3358.18 343.175   1
  -3   2  17 3661.51 321.201   6
  -3   2  18 3733.32 330.370   6
  -3   2  18 3552.50 360.310   1
  -3   2  19 6443.83 503.478   1
  -3   2  19 7111.63 466.275   6
  -3   2  20 692.420 193.126   1
  -3   2  20 725.936 181.920   6
  -3   2  21 9726.12 661.515   1
  -3   2  21 10611.0 591.267   6
  -3   2  22 568.333 211.853   1
  -3   2  23 3817.51 440.282   1
  -3   3 -23 7542.90 727.344   2
  -3   3 -22 227.111 217.004   2
  -3   3 -21 5104.94 584.856   2
  -3   3 -20 4838.39 550.124   2
  -3   3 -20 5180.59 430.327   8
  -3   3 -19 1412.12 235.056   8
  -3   3 -19 752.968 261.086   2
  -3   3 -18 7900.10 633.839   2
  -3   3 -18 7574.46 479.870   8
  -3   3 -17 318.210 123.801   8
  -3   3 -17 14.7958 167.553   2
  -3   3 -16 13968.4 803.953   2
  -3   3 -16 15158.4 624.677   8
  -3   3 -15 203.556 155.921   2
  -3   3 -15 197.802 110.380   8
  -3   3 -14 10431.1 637.115   2
  -3   3 -14 8787.03 398.115   4
  -3   3 -14 10449.2 467.433   8
  -3   3 -13 1689.67 198.691   8
  -3   3 -13 1810.87 281.991   2
  -3   3 -12 33115.0 806.373   8
  -3   3 -12 34031.7 1082.83   2
  -3   3 -11 249.561 100.409   8
  -3   3 -11 90.4131 95.2303   5
  -3   3 -11 240.373 134.698   2
  -3   3 -10 2633.69 270.791   2
  -3   3 -10 2444.28 190.241   8
  -3   3 -10 2088.33 163.071   5
  -3   3  -9 14580.0 436.454   8
  -3   3  -9 15684.3 620.613   2
  -3   3  -9 14419.7 389.713   5
  -3   3  -8 14435.7 413.435   8
  -3   3  -8 14433.7 453.738   1
  -3   3  -8 15821.0 589.038   2
  -3   3  -8 14898.5 361.259   5
  -3   3  -7 16522.4 568.590   2
  -3   3  -7 16302.5 461.968   1
  -3   3  -7 16403.7 421.995   8
  -3   3  -6 16438.7 533.749   2
  -3   3  -6 15595.7 431.205   1
  -3   3  -5 17688.2 523.455   2
  -3   3  -4 1498.05 156.118   2
  -3   3  -3 55576.4 962.838   2
  -3   3  -3 56043.7 1018.36   7
  -3   3  -3 55777.7 1006.87   6
  -3   3  -2 417.433 98.1379   2
  -3   3  -2 423.345 128.953   7
  -3   3  -2 323.892 94.8070   6
  -3   3  -1 79104.1 1257.44   3
  -3   3  -1 78598.2 1202.49   2
  -3   3  -1 79302.1 1257.50   7
  -3   3  -1 78821.0 1233.94   6
  -3   3  -1 83439.3 1259.55   4
  -3   3   0 14149.2 435.038   7
  -3   3   0 14006.3 419.823   2
  -3   3   0 13830.7 432.601   3
  -3   3   0 14370.7 436.549   4
  -3   3   1 54626.7 963.403   7
  -3   3   1 57713.9 989.956   4
  -3   3   1 55914.3 869.943   1
  -3   3   1 55130.2 969.119   3
  -3   3   1 56611.9 977.571   2
  -3   3   2 49811.5 918.868   2
  -3   3   2 49980.4 892.657   7
  -3   3   2 51387.6 925.691   4
  -3   3   2 49921.7 828.575   1
  -3   3   2 49374.3 898.384   3
  -3   3   3 37290.2 751.431   3
  -3   3   3 37411.0 733.217   7
  -3   3   3 38869.4 779.362   4
  -3   3   3 36211.6 704.382   1
  -3   3   4 40816.6 798.633   3
  -3   3   4 40255.5 762.841   7
  -3   3   4 42481.2 830.620   4
  -3   3   4 41679.4 788.577   1
  -3   3   5 12966.6 427.193   4
  -3   3   5 12936.9 420.032   3
  -3   3   5 13093.9 421.942   1
  -3   3   6 70303.9 1178.95   3
  -3   3   6 72178.8 1191.73   4
  -3   3   6 70168.6 1194.43   1
  -3   3   7 5213.62 288.772   1
  -3   3   7 5033.59 284.013   3
  -3   3   8 61945.0 1176.23   1
  -3   3   8 61483.2 1159.34   3
  -3   3   9 6985.03 365.734   1
  -3   3   9 6220.99 334.671   3
  -3   3  10 24813.2 704.965   3
  -3   3  10 24072.1 726.233   1
  -3   3  11 5699.53 359.473   1
  -3   3  12 15085.2 643.925   6
  -3   3  12 14616.2 597.455   1
  -3   3  13 9302.38 513.857   6
  -3   3  13 9057.72 484.627   1
  -3   3  14 8869.14 511.789   6
  -3   3  14 8806.58 492.272   1
  -3   3  15 24584.6 876.757   1
  -3   3  15 25870.8 901.181   6
  -3   3  16 420.421 124.617   1
  -3   3  16 493.621 166.411   6
  -3   3  17 11862.7 620.318   6
  -3   3  17 11073.5 616.174   1
  -3   3  18 0.53040 119.496   1
  -3   3  18 43.6965 108.475   6
  -3   3  19 7454.33 548.650   1
  -3   3  19 7833.46 521.010   6
  -3   3  20 339.572 163.190   6
  -3   3  20 317.678 166.906   1
  -3   3  21 7564.72 532.552   6
  -3   3  21 7499.71 586.681   1
  -3   3  22 1615.85 311.236   1
  -3   3  22 1934.15 300.163   6
  -3   3  23 1721.08 318.385   1
  -3   4 -22 5999.70 598.527   2
  -3   4 -21 863.672 221.730   2
  -3   4 -20 5387.73 532.843   2
  -3   4 -19 3180.36 416.392   2
  -3   4 -19 3922.92 359.963   8
  -3   4 -18 14473.9 821.574   2
  -3   4 -18 15787.3 677.331   8
  -3   4 -17 245.901 121.312   8
  -3   4 -17 38.7601 128.355   2
  -3   4 -16 15633.9 798.838   2
  -3   4 -16 15706.2 619.570   8
  -3   4 -15 80.6343 71.3315   8
  -3   4 -15 174.122 148.746   2
  -3   4 -15-35.1695 116.009   4
  -3   4 -14 25727.2 958.404   2
  -3   4 -14 26329.6 750.614   8
  -3   4 -13 5968.72 439.769   2
  -3   4 -13 6050.26 332.498   8
  -3   4 -12 18659.5 565.280   8
  -3   4 -12 19594.8 761.948   2
  -3   4 -11 15088.1 624.438   2
  -3   4 -11 14294.9 460.315   8
  -3   4 -11 14668.7 529.393   5
  -3   4 -10 5245.82 351.363   2
  -3   4 -10 4921.00 290.448   5
  -3   4 -10 4965.71 247.771   8
  -3   4  -9 16685.2 441.258   8
  -3   4  -9 16478.7 591.255   2
  -3   4  -9 17048.9 496.528   1
  -3   4  -9 17105.5 509.774   5
  -3   4  -8 8406.56 320.481   1
  -3   4  -8 8228.11 278.091   8
  -3   4  -8 8928.16 405.362   2
  -3   4  -8 8646.48 340.138   5
  -3   4  -7 17087.2 440.405   1
  -3   4  -7 17218.1 463.617   5
  -3   4  -7 16309.7 379.822   8
  -3   4  -7 16835.6 531.666   2
  -3   4  -6 4078.57 246.793   2
  -3   4  -6 3948.82 190.226   1
  -3   4  -5 19374.4 517.320   2
  -3   4  -5 18707.9 415.569   1
  -3   4  -4 8011.93 368.121   3
  -3   4  -4 7443.46 304.409   2
  -3   4  -3 107014. 1477.07   2
  -3   4  -3 105668. 1609.92   3
  -3   4  -2 1929.62 179.052   3
  -3   4  -2 1784.02 145.312   2
  -3   4  -1 44404.8 803.718   2
  -3   4  -1 43400.2 881.741   3
  -3   4   0 25886.9 629.623   7
  -3   4   0 25625.1 473.817   1
  -3   4   0 26805.4 592.823   2
  -3   4   0 26001.1 644.148   3
  -3   4   1 38885.8 794.319   7
  -3   4   1 39755.1 823.272   3
  -3   4   1 39954.4 660.413   1
  -3   4   1 40481.1 778.644   2
  -3   4   2 34642.0 753.581   4
  -3   4   2 32801.6 705.681   7
  -3   4   2 33310.5 744.351   3
  -3   4   2 32994.0 611.418   1
  -3   4   3 29547.8 692.233   4
  -3   4   3 29698.5 597.783   1
  -3   4   3 29244.7 646.894   7
  -3   4   3 29195.1 691.955   3
  -3   4   4 87509.7 1304.01   7
  -3   4   4 88520.8 1281.15   1
  -3   4   4 85729.8 1385.25   3
  -3   4   5 1632.11 146.425   7
  -3   4   5 1688.61 170.320   3
  -3   4   5 1781.59 156.158   1
  -3   4   6 86588.4 1272.75   7
  -3   4   6 86460.2 1367.96   1
  -3   4   6 86875.8 1447.77   3
  -3   4   7 1650.32 147.179   7
  -3   4   7 1514.09 174.567   1
  -3   4   7 1577.14 197.869   3
  -3   4   8 103341. 1649.45   1
  -3   4   8 105499. 1729.41   3
  -3   4   9 23021.0 716.396   3
  -3   4   9 22652.1 679.158   1
  -3   4  10 33397.6 874.956   1
  -3   4  10 33853.9 901.659   3
  -3   4  11 15035.9 586.749   1
  -3   4  12 13050.3 629.660   6
  -3   4  12 13529.9 578.182   1
  -3   4  13 20857.5 758.141   1
  -3   4  13 22272.4 847.444   6
  -3   4  14 414.060 157.381   6
  -3   4  14 509.094 148.321   1
  -3   4  15 21192.1 814.558   1
  -3   4  15 22097.3 876.031   6
  -3   4  16-139.784 128.569   6
  -3   4  16-65.8286 113.565   1
  -3   4  17 25962.6 988.046   6
  -3   4  17 26286.9 975.943   1
  -3   4  18 451.755 160.769   6
  -3   4  18 306.851 124.545   1
  -3   4  19 7066.87 534.348   1
  -3   4  19 7595.26 551.196   6
  -3   4  20 2499.49 341.275   1
  -3   4  20 2953.91 363.097   6
  -3   4  21 3278.14 400.711   1
  -3   4  21 3597.27 400.287   6
  -3   4  22 4124.88 445.968   6
  -3   4  22 3931.70 457.914   1
  -3   4  23 1064.34 256.482   6
  -3   5 -20 14592.7 823.404   2
  -3   5 -19-352.498 190.731   2
  -3   5 -18 16717.2 840.645   2
  -3   5 -17 1515.71 243.074   2
  -3   5 -17 1651.45 206.113   8
  -3   5 -16 9453.00 585.727   2
  -3   5 -16 7992.57 451.419   4
  -3   5 -16 9971.71 480.796   8
  -3   5 -15 6101.32 352.091   8
  -3   5 -15 4946.31 374.341   4
  -3   5 -15 5996.26 442.817   2
  -3   5 -14 13134.8 636.744   2
  -3   5 -14 13274.7 506.399   8
  -3   5 -13 11770.9 447.042   8
  -3   5 -13 11044.7 556.197   2
  -3   5 -12 8454.83 458.397   2
  -3   5 -12 8434.96 357.552   8
  -3   5 -11 9301.74 455.109   2
  -3   5 -11 8679.22 332.157   8
  -3   5 -10 3789.32 209.836   8
  -3   5 -10 3364.89 212.661   1
  -3   5 -10 3574.63 277.636   2
  -3   5 -10 3207.20 253.566   5
  -3   5  -9 19831.2 458.594   8
  -3   5  -9 19732.5 628.271   5
  -3   5  -9 20129.0 512.112   1
  -3   5  -9 20999.4 620.824   2
  -3   5  -8 1384.88 178.379   3
  -3   5  -8 1425.71 164.558   2
  -3   5  -8 1298.65 114.176   1
  -3   5  -8 1371.62 105.753   8
  -3   5  -8 1311.51 160.167   5
  -3   5  -7 9975.67 250.723   8
  -3   5  -7 10115.2 372.424   2
  -3   5  -7 10743.0 457.149   3
  -3   5  -7 10177.9 416.650   5
  -3   5  -7 10252.4 300.933   1
  -3   5  -6 559.619 132.736   3
  -3   5  -6 520.244 74.9695   1
  -3   5  -6 555.217 135.132   5
  -3   5  -6 579.807 104.486   2
  -3   5  -5 35979.0 555.280   1
  -3   5  -5 36013.4 707.260   2
  -3   5  -5 35679.1 852.862   3
  -3   5  -4 2944.02 113.034   1
  -3   5  -4 3156.83 242.643   3
  -3   5  -4 3259.66 191.528   2
  -3   5  -3 39137.8 864.829   3
  -3   5  -3 35331.6 498.757   1
  -3   5  -3 40181.5 721.116   2
  -3   5  -2 13787.2 394.120   2
  -3   5  -2 12962.8 247.183   1
  -3   5  -2 13333.5 476.513   3
  -3   5  -1 35949.6 690.412   2
  -3   5  -1 35130.2 810.931   3
  -3   5  -1 35419.0 507.171   1
  -3   5   0 48916.7 674.986   1
  -3   5   0 48051.3 847.723   2
  -3   5   0 47216.4 969.905   3
  -3   5   1 11532.0 287.407   1
  -3   5   1 11781.2 446.070   3
  -3   5   2 15480.1 514.103   3
  -3   5   2 15188.2 366.511   1
  -3   5   3 6631.85 296.947   7
  -3   5   3 6640.95 338.235   3
  -3   5   3 6766.79 254.580   1
  -3   5   4 79448.6 1248.90   7
  -3   5   4 80181.2 1390.82   3
  -3   5   4 81459.0 1200.71   1
  -3   5   5 155.231 98.9288   3
  -3   5   5 52.0076 51.7053   7
  -3   5   5 48.7432 59.7410   1
  -3   5   6 69332.2 1111.03   7
  -3   5   6 69090.6 1173.47   1
  -3   5   6 69804.8 1328.45   3
  -3   5   7 10633.8 356.600   7
  -3   5   7 9881.17 400.656   1
  -3   5   7 10183.8 469.136   3
  -3   5   8 31481.9 786.054   1
  -3   5   8 32545.4 658.034   7
  -3   5   8 32273.3 893.921   3
  -3   5   9 24518.1 782.058   3
  -3   5   9 24075.6 539.085   7
  -3   5   9 24286.0 709.312   1
  -3   5  10 20587.0 675.033   1
  -3   5  10 20547.2 730.066   3
  -3   5  11 19911.0 691.750   1
  -3   5  12 4992.26 354.855   1
  -3   5  12 5326.35 416.890   6
  -3   5  13 28246.2 897.988   1
  -3   5  13 28712.2 1011.65   6
  -3   5  14 425.315 137.074   1
  -3   5  14 484.597 153.814   6
  -3   5  15 19681.2 797.101   1
  -3   5  15 21060.8 894.138   6
  -3   5  16 495.949 151.646   1
  -3   5  16 359.070 165.649   6
  -3   5  17 12807.9 722.505   6
  -3   5  17 12069.4 662.576   1
  -3   5  18 2960.24 351.107   1
  -3   5  18 2675.67 348.767   6
  -3   5  19 2856.50 360.728   1
  -3   5  19 3824.18 416.684   6
  -3   5  20 7361.45 582.334   6
  -3   5  20 7429.37 571.703   1
  -3   5  21 1221.86 260.286   1
  -3   5  21 1074.89 261.166   6
  -3   5  22 5589.41 535.370   1
  -3   5  22 5637.92 531.983   6
  -3   5  23 4033.17 477.256   6
  -3   5  24 2108.91 340.599   6
  -3   6 -19 752.109 183.875   3
  -3   6 -18 23075.6 938.268   2
  -3   6 -18 26883.8 939.159   3
  -3   6 -17 2754.74 286.523   3
  -3   6 -17 2943.72 313.339   2
  -3   6 -16 2979.14 312.088   4
  -3   6 -16 3530.02 340.320   2
  -3   6 -16 3636.72 337.051   3
  -3   6 -15 13413.7 521.360   8
  -3   6 -15 12721.2 607.463   2
  -3   6 -15 14382.9 641.025   3
  -3   6 -15 10985.8 615.433   4
  -3   6 -14 4561.15 290.265   8
  -3   6 -14 4669.60 358.496   2
  -3   6 -14 4139.30 341.367   3
  -3   6 -13 14413.4 487.304   8
  -3   6 -13 14258.1 584.208   2
  -3   6 -13 15217.1 638.085   3
  -3   6 -12 475.846 126.303   2
  -3   6 -12 683.948 114.091   8
  -3   6 -12 460.595 132.175   3
  -3   6 -11 18808.4 607.766   2
  -3   6 -11 18479.4 495.046   8
  -3   6 -11 19806.7 701.968   3
  -3   6 -10 330.429 119.632   2
  -3   6 -10 357.691 128.156   3
  -3   6 -10 301.910 92.8782   1
  -3   6 -10 296.898 62.6203   8
  -3   6  -9 23397.5 611.998   2
  -3   6  -9 22487.6 472.671   8
  -3   6  -9 22266.2 506.907   1
  -3   6  -9 23510.9 742.538   3
  -3   6  -8 464.810 144.358   3
  -3   6  -8 295.423 69.3812   1
  -3   6  -8 392.702 69.8233   8
  -3   6  -8 481.313 112.600   2
  -3   6  -7 39156.9 758.883   2
  -3   6  -7 38965.5 947.649   3
  -3   6  -7 37485.1 539.430   8
  -3   6  -7 38065.1 598.986   1
  -3   6  -6 12743.6 378.728   2
  -3   6  -6 12096.0 251.179   1
  -3   6  -6 11705.9 489.117   3
  -3   6  -5 17786.9 448.810   2
  -3   6  -5 17752.8 597.578   3
  -3   6  -4 14253.0 389.923   2
  -3   6  -4 13597.9 518.930   3
  -3   6  -3 6670.34 258.925   2
  -3   6  -3 6938.93 362.547   3
  -3   6  -2 45749.1 778.961   2
  -3   6  -2 44110.9 978.676   3
  -3   6  -1 355.578 120.043   3
  -3   6   0 15453.4 275.974   1
  -3   6   0 15434.5 538.200   3
  -3   6   1 1947.67 107.439   1
  -3   6   1 1891.04 196.850   3
  -3   6   2 26953.6 503.699   1
  -3   6   2 26600.1 739.649   3
  -3   6   3 1877.81 133.905   1
  -3   6   3 1613.94 182.881   3
  -3   6   4 27172.8 590.147   1
  -3   6   4 26806.2 777.595   3
  -3   6   5 11791.9 392.608   1
  -3   6   5 12115.4 514.554   3
  -3   6   6 39480.5 827.013   1
  -3   6   6 39561.5 1007.11   3
  -3   6   7 22224.9 623.231   1
  -3   6   7 22281.2 557.251   7
  -3   6   7 23072.9 762.343   3
  -3   6   8 28405.5 635.307   7
  -3   6   8 28524.9 753.243   1
  -3   6   8 29462.4 890.840   3
  -3   6   9 31646.8 828.190   1
  -3   6   9 30729.0 654.573   7
  -3   6   9 31780.6 955.605   3
  -3   6  10 11480.6 499.915   1
  -3   6  10 11043.9 357.645   7
  -3   6  10 11318.9 573.621   3
  -3   6  11 30580.6 1033.81   6
  -3   6  11 26814.3 577.023   7
  -3   6  11 29896.6 866.980   1
  -3   6  12 2397.05 303.061   6
  -3   6  12 2151.43 251.978   1
  -3   6  13 35622.5 1180.17   6
  -3   6  13 34667.9 1017.76   1
  -3   6  14 641.153 166.824   1
  -3   6  14 638.760 182.897   6
  -3   6  15 14481.3 689.226   1
  -3   6  15 15290.3 784.264   6
  -3   6  16 10880.9 676.695   6
  -3   6  16 10111.2 595.037   1
  -3   6  17 4576.61 453.240   6
  -3   6  17 4461.82 415.762   1
  -3   6  18 8422.17 587.724   1
  -3   6  18 8863.73 641.504   6
  -3   6  19 1362.77 256.983   1
  -3   6  19 2180.85 345.364   6
  -3   6  20 11295.6 728.869   1
  -3   6  20 13216.9 811.512   6
  -3   6  21 5515.65 515.191   1
  -3   6  21-48.4774 179.638   6
  -3   6  22 3596.05 441.984   1
  -3   6  22 3051.11 422.308   6
  -3   6  23-21.0973 171.037   6
  -3   7 -18 13375.5 658.238   3
  -3   7 -17 7221.59 512.205   4
  -3   7 -17 9617.24 543.383   3
  -3   7 -16 1930.68 287.448   4
  -3   7 -16 2869.92 297.497   3
  -3   7 -15 13449.6 573.758   2
  -3   7 -15 14127.1 644.536   3
  -3   7 -15 11248.8 666.681   4
  -3   7 -14 1148.49 189.902   3
  -3   7 -14 1105.76 167.738   2
  -3   7 -13 26807.4 871.141   3
  -3   7 -13 26460.3 750.381   2
  -3   7 -13 24923.7 653.083   8
  -3   7 -12 1584.50 207.134   3
  -3   7 -12 1491.33 171.980   2
  -3   7 -12 1215.41 127.343   8
  -3   7 -11 32521.1 763.911   2
  -3   7 -11 34124.1 959.420   3
  -3   7 -11 32194.0 670.196   8
  -3   7 -10 177.187 98.1358   3
  -3   7 -10 185.532 59.5677   8
  -3   7 -10 192.966 92.7089   2
  -3   7  -9 30931.6 566.263   8
  -3   7  -9 32879.1 694.138   2
  -3   7  -9 34141.6 921.899   3
  -3   7  -9 30944.4 564.453   1
  -3   7  -8 25735.5 571.707   2
  -3   7  -8 26076.5 785.143   3
  -3   7  -8 24061.8 431.291   8
  -3   7  -8 22091.6 399.653   1
  -3   7  -7 534.467 87.0241   2
  -3   7  -7 563.007 122.883   3
  -3   7  -7 420.646 43.6887   8
  -3   7  -6 3085.74 173.120   2
  -3   7  -6 3221.98 266.623   3
  -3   7  -5 1092.47 159.515   3
  -3   7  -5 1224.71 106.546   2
  -3   7  -4 6088.35 231.135   2
  -3   7  -4 5609.12 345.582   3
  -3   7  -3 3480.89 273.383   3
  -3   7  -2 21019.8 669.799   3
  -3   7  -1 776.406 171.285   3
  -3   7  -1 805.222 67.5640   8
  -3   7   0 22540.6 701.515   3
  -3   7   0 21988.3 416.304   8
  -3   7   1 1624.52 193.197   3
  -3   7   1 1609.62 114.673   8
  -3   7   2 33921.4 591.128   1
  -3   7   2 33782.8 642.259   8
  -3   7   2 33559.5 901.316   3
  -3   7   3 12388.6 536.106   3
  -3   7   3 12548.6 355.724   1
  -3   7   3 12129.2 377.633   8
  -3   7   4 22128.9 561.411   8
  -3   7   4 21886.3 526.458   1
  -3   7   4 22155.4 744.177   3
  -3   7   5 24898.6 603.241   1
  -3   7   5 24465.8 798.282   3
  -3   7   6 29332.4 703.074   1
  -3   7   6 29761.4 913.847   3
  -3   7   7 14772.9 507.358   1
  -3   7   7 14755.2 643.531   3
  -3   7   8 5808.10 410.684   3
  -3   7   8 6202.96 340.349   1
  -3   7   9 5664.96 411.310   3
  -3   7   9 5258.66 328.610   1
  -3   7  10 3011.18 318.001   3
  -3   7  10 2888.16 262.246   1
  -3   7  10 2722.11 186.986   7
  -3   7  11 50443.6 1404.08   6
  -3   7  11 48894.2 1171.48   1
  -3   7  12 153.413 139.705   6
  -3   7  12 79.3720 96.7095   1
  -3   7  13 18296.9 853.357   6
  -3   7  13 16825.5 705.712   1
  -3   7  14 2845.32 301.523   1
  -3   7  14 2744.04 347.357   6
  -3   7  15 14457.0 794.589   6
  -3   7  15 12136.3 646.980   1
  -3   7  16 10845.3 631.820   1
  -3   7  16 12371.3 747.934   6
  -3   7  17 1835.67 301.100   1
  -3   7  17 1937.42 318.497   6
  -3   7  18 12528.9 783.461   6
  -3   7  18 10973.0 686.495   1
  -3   7  19-113.078 167.471   6
  -3   7  19 145.064 141.628   1
  -3   7  20 10127.5 749.921   6
  -3   7  20 10662.2 720.394   1
  -3   7  21 41.9364 168.138   1
  -3   7  21 192.170 205.160   6
  -3   7  22 5872.25 587.483   6
  -3   8 -17 9913.40 652.078   4
  -3   8 -17 15974.9 702.033   3
  -3   8 -16 2130.52 306.464   4
  -3   8 -16 2449.17 276.303   3
  -3   8 -15 21083.5 799.253   3
  -3   8 -15 18166.0 889.711   4
  -3   8 -14 701.634 177.683   3
  -3   8 -13 18627.8 731.057   3
  -3   8 -12 2120.13 248.700   3
  -3   8 -12 1897.88 162.869   2
  -3   8 -11 11595.8 395.148   2
  -3   8 -11 11922.8 374.490   8
  -3   8 -11 13207.2 591.029   3
  -3   8 -10 10352.7 320.315   8
  -3   8 -10 10178.3 351.192   2
  -3   8 -10 11495.7 546.117   3
  -3   8  -9 17429.8 663.719   3
  -3   8  -9 16225.8 426.683   2
  -3   8  -9 16511.9 380.910   8
  -3   8  -8 25241.2 449.234   8
  -3   8  -8 24325.8 509.206   2
  -3   8  -8 26141.4 815.371   3
  -3   8  -7 878.719 156.760   3
  -3   8  -7 808.658 88.0656   2
  -3   8  -7 891.279 68.9882   8
  -3   8  -6 24591.3 371.696   8
  -3   8  -6 26030.5 794.098   3
  -3   8  -6 24542.0 460.350   2
  -3   8  -5 524.919 140.246   3
  -3   8  -5 500.142 43.5941   8
  -3   8  -4 12232.9 231.320   8
  -3   8  -4 13379.5 553.173   3
  -3   8  -3 1069.39 179.658   3
  -3   8  -3 806.030 59.7083   8
  -3   8  -2 29496.0 847.872   3
  -3   8  -2 27879.2 467.304   8
  -3   8  -1 5517.33 197.142   8
  -3   8  -1 6498.17 392.202   3
  -3   8   0 19727.5 699.297   3
  -3   8   0 19581.5 437.208   8
  -3   8   1 12914.2 372.678   8
  -3   8   1 14470.8 596.728   3
  -3   8   2 16178.1 646.422   3
  -3   8   2 14748.3 427.985   8
  -3   8   3 18320.4 509.767   8
  -3   8   3 19080.1 711.528   3
  -3   8   4 6198.40 278.936   1
  -3   8   4 5867.34 405.199   3
  -3   8   5 25366.3 627.743   1
  -3   8   5 23400.6 831.655   3
  -3   8   6 289.854 113.253   3
  -3   8   6 257.229 78.1366   1
  -3   8   7 11425.2 456.318   1
  -3   8   7 12498.8 611.784   3
  -3   8   8 1968.09 248.872   3
  -3   8   8 1644.55 187.661   1
  -3   8   9 22617.8 722.993   1
  -3   8   9 22127.2 860.205   3
  -3   8  10 5638.20 367.204   1
  -3   8  11 27681.1 1052.31   6
  -3   8  11 26409.8 850.063   1
  -3   8  12 1284.45 256.873   6
  -3   8  12 1242.39 205.855   1
  -3   8  13 17215.3 736.436   1
  -3   8  13 18200.1 877.526   6
  -3   8  14 12635.3 649.677   1
  -3   8  14 13270.0 769.127   6
  -3   8  15 4896.20 487.119   6
  -3   8  15 4539.93 404.632   1
  -3   8  16 13927.0 733.676   1
  -3   8  16 15540.5 862.302   6
  -3   8  17 838.868 202.819   1
  -3   8  17 1238.38 271.420   6
  -3   8  18 9577.57 718.695   6
  -3   8  18 9434.95 647.520   1
  -3   8  19 158.152 170.316   6
  -3   8  20 9906.03 749.761   6
  -3   8  21 1994.24 361.896   6
  -3   9 -17 7930.10 603.381   4
  -3   9 -16 56.6226 104.419   3
  -3   9 -16-238.184 170.610   4
  -3   9 -15 12525.6 766.450   4
  -3   9 -15 13391.2 640.682   3
  -3   9 -14 2893.00 299.103   3
  -3   9 -13 14864.8 662.755   3
  -3   9 -12 7701.27 467.542   3
  -3   9 -11 17050.0 695.292   3
  -3   9 -10 23558.9 817.887   3
  -3   9  -9 10319.5 299.730   8
  -3   9  -9 11307.0 552.048   3
  -3   9  -8 22849.7 443.403   8
  -3   9  -8 23669.5 800.692   3
  -3   9  -7 411.703 143.754   3
  -3   9  -6 35557.6 583.891   8
  -3   9  -6 39120.0 1035.10   3
  -3   9  -5 4037.07 158.413   8
  -3   9  -5 5216.12 368.744   3
  -3   9  -4 51101.1 753.257   8
  -3   9  -4 55276.1 1260.82   3
  -3   9  -3 294.027 110.482   3
  -3   9  -3 163.286 41.0215   8
  -3   9  -2 8357.09 270.190   8
  -3   9  -2 8483.69 469.158   3
  -3   9  -1 20319.5 473.730   8
  -3   9  -1 21615.8 765.924   3
  -3   9   0 2430.32 163.254   8
  -3   9   0 2432.03 264.588   3
  -3   9   1 19825.1 518.327   8
  -3   9   1 20359.6 764.350   3
  -3   9   2-63.6819 122.135   3
  -3   9   2 136.604 59.4500   8
  -3   9   3 26930.6 908.851   3
  -3   9   4 390.198 149.664   3
  -3   9   5 5685.36 422.518   3
  -3   9   6 12966.7 646.817   3
  -3   9   7 40333.5 1195.78   3
  -3   9   8 3112.83 342.099   3
  -3   9   9 29253.9 1039.11   3
  -3   9  10 8264.85 578.832   6
  -3   9  11 10235.7 534.238   1
  -3   9  11 11892.2 699.629   6
  -3   9  12 17507.7 868.039   6
  -3   9  13 9237.44 645.867   6
  -3   9  14 11001.7 721.395   6
  -3   9  15 698.069 244.920   6
  -3   9  16 10746.5 743.686   6
  -3   9  17 79.8214 178.682   6
  -3   9  18 10319.4 764.878   6
  -3   9  19 783.652 241.856   6
  -3   9  20 4923.51 562.677   6
  -3  10 -17 9177.57 681.995   4
  -3  10 -16 796.216 248.420   4
  -3  10 -15 14218.1 830.731   4
  -3  10 -15 15127.5 698.441   3
  -3  10 -14 9260.15 656.412   4
  -3  10 -14 9310.18 540.794   3
  -3  10 -13 8270.77 505.962   3
  -3  10 -12 13495.6 640.393   3
  -3  10 -11 5136.35 395.753   3
  -3  10 -10 22443.5 823.744   3
  -3  10  -9 26.6177 86.4710   3
  -3  10  -8 19989.0 766.398   3
  -3  10  -7 1116.69 205.289   3
  -3  10  -6 29302.2 936.508   3
  -3  10  -5 2192.49 257.414   3
  -3  10  -4 17239.6 709.632   3
  -3  10  -3 6758.76 441.817   3
  -3  10  -2 310.580 114.747   3
  -3  10  -1 22986.3 572.497   8
  -3  10  -1 24376.4 866.250   3
  -3  10   0 3463.22 224.815   8
  -3  10   0 3734.31 341.394   3
  -3  10   1 30374.7 1000.40   3
  -3  10   2 124.094 122.164   3
  -3  10   3 17100.8 755.090   3
  -3  10   4 3161.90 329.046   3
  -3  10   5 14497.1 705.819   3
  -3  10   6 2548.04 305.093   3
  -3  10   7 12928.2 688.144   3
  -3  10   8 5106.22 435.127   3
  -3  10   9 6605.82 524.281   6
  -3  10  10 8438.25 594.880   6
  -3  10  11 1042.17 227.148   6
  -3  10  12 8408.25 614.579   6
  -3  10  13 300.655 172.110   6
  -3  10  14 13018.7 808.983   6
  -3  10  15 188.736 182.794   6
  -3  10  16 15286.3 906.338   6
  -3  10  17 1441.11 325.546   6
  -3  10  18 7656.73 670.765   6
  -3  10  19 846.573 274.259   6
  -3  11 -18 2.19012 173.919   4
  -3  11 -17 2125.98 365.923   4
  -3  11 -16 4055.33 461.894   4
  -3  11 -15 10548.1 730.113   4
  -3  11 -14 10118.3 708.482   4
  -3  11 -14 9767.06 569.641   3
  -3  11 -13 4283.85 384.079   3
  -3  11 -12 14866.6 695.454   3
  -3  11 -11 1657.48 244.976   3
  -3  11 -10 13739.0 664.143   3
  -3  11  -9-12.4636 100.590   3
  -3  11  -8 19813.8 802.077   3
  -3  11  -7 6133.52 444.063   3
  -3  11  -6 18812.2 779.879   3
  -3  11  -5 11932.4 622.388   3
  -3  11  -4 8042.54 511.440   3
  -3  11  -3 24679.0 915.608   3
  -3  11  -2 3354.07 344.274   3
  -3  11  -1 16479.9 749.581   3
  -3  11   0-120.282 165.210   3
  -3  11   1 24477.4 939.807   3
  -3  11   2 2963.71 332.858   3
  -3  11   3 7296.08 516.128   3
  -3  11   4 5792.26 458.761   3
  -3  11   5 8953.41 583.421   3
  -3  11   6 9583.63 611.464   3
  -3  11   7 6606.74 513.555   3
  -3  11   8 11119.6 679.038   3
  -3  11   8 11383.9 699.421   6
  -3  11   9 880.180 224.781   6
  -3  11  10 8844.99 629.602   6
  -3  11  11-259.296 200.066   6
  -3  11  12 6443.51 567.598   6
  -3  11  13-197.236 178.567   6
  -3  11  14 10176.5 729.600   6
  -3  11  15 766.916 234.394   6
  -3  11  16 11617.4 811.253   6
  -3  11  17 419.217 217.387   6
  -3  12 -17 272.916 214.695   4
  -3  12 -16 7042.06 625.414   4
  -3  12 -15 4544.64 497.857   4
  -3  12 -14 4357.82 482.061   4
  -3  12 -13 454.508 175.814   3
  -3  12 -13 459.543 220.979   4
  -3  12 -12 6817.15 490.855   3
  -3  12 -11 1629.95 256.225   3
  -3  12 -10 16316.3 764.597   3
  -3  12  -9 1799.85 272.843   3
  -3  12  -8 10589.4 614.192   3
  -3  12  -7 5671.59 453.316   3
  -3  12  -6 6746.64 492.915   3
  -3  12  -5 19103.2 836.810   3
  -3  12  -4 981.677 213.449   3
  -3  12  -3 16305.5 783.091   3
  -3  12  -2 268.618 130.188   3
  -3  12  -1 13706.1 721.354   3
  -3  12   0 543.925 169.698   3
  -3  12   1 13901.1 740.174   3
  -3  12   2 7205.82 532.282   3
  -3  12   3 3187.41 366.838   3
  -3  12   4 9367.02 621.508   3
  -3  12   5 1367.45 255.951   3
  -3  12   6 16038.7 823.863   3
  -3  12   7 61.3762 139.520   3
  -3  12   7 84.9842 162.018   6
  -3  12   8 8951.66 635.829   6
  -3  12   9 95.7660 150.625   6
  -3  12  10 7392.59 605.813   6
  -3  12  11-87.4210 157.343   6
  -3  12  12 5996.59 560.521   6
  -3  12  13 5283.05 545.339   6
  -3  12  14 3078.76 438.523   6
  -3  12  15 2540.87 368.836   6
  -3  12  16 1507.20 331.508   6
  -3  13 -15 46.5419 201.740   4
  -3  13 -14 6459.62 594.476   4
  -3  13 -13 1056.48 285.660   4
  -3  13 -12 3686.47 389.247   3
  -3  13 -12 3473.74 443.577   4
  -3  13 -11 1802.05 272.555   3
  -3  13 -10 12407.8 704.252   3
  -3  13  -9 3833.66 386.483   3
  -3  13  -8 5426.14 470.637   3
  -3  13  -7 15528.2 792.048   3
  -3  13  -6 825.179 210.212   3
  -3  13  -5 16411.5 816.049   3
  -3  13  -4 15.2731 125.439   3
  -3  13  -3 22975.3 978.512   3
  -3  13  -2 2754.63 349.532   3
  -3  13  -1 12864.1 741.523   3
  -3  13   0 5421.03 480.821   3
  -3  13   1 11494.9 703.907   3
  -3  13   2 9412.93 639.417   3
  -3  13   3 1432.38 265.864   3
  -3  13   4 18468.3 910.366   3
  -3  13   5 193.383 135.170   3
  -3  13   5 248.448 135.121   6
  -3  13   6 15662.3 850.559   3
  -3  13   6 15489.6 849.149   6
  -3  13   7 2403.23 333.245   6
  -3  13   8 13676.6 816.006   6
  -3  13   9 1672.40 300.011   6
  -3  13  10 7933.64 650.529   6
  -3  13  11 2748.84 379.658   6
  -3  13  12 1184.12 297.164   6
  -3  13  13 7478.96 662.754   6
  -3  13  14 431.006 160.941   6
  -3  14 -13 1159.59 284.915   4
  -3  14 -12 3978.26 485.083   4
  -3  14 -11 3023.82 367.154   3
  -3  14 -11 2429.11 378.580   4
  -3  14 -10 5294.02 490.603   3
  -3  14  -9 9761.65 654.512   3
  -3  14  -8 2743.52 359.281   3
  -3  14  -7 13505.5 767.479   3
  -3  14  -6-82.5454 156.764   3
  -3  14  -5 11809.7 727.404   3
  -3  14  -4 84.9939 128.456   3
  -3  14  -3 11393.2 717.917   3
  -3  14  -2 4743.08 478.827   3
  -3  14  -1 6389.99 540.670   3
  -3  14   0 11284.4 724.782   3
  -3  14   1 2106.08 317.508   3
  -3  14   2 13239.3 794.674   3
  -3  14   3 258.175 135.451   3
  -3  14   4 8557.43 643.856   3
  -3  14   4 8137.71 629.486   6
  -3  14   5 225.014 150.597   3
  -3  14   5 329.530 164.382   6
  -3  14   6 12500.4 789.317   6
  -3  14   7 2470.22 366.704   6
  -3  14   8 6051.36 553.418   6
  -3  14   9 3202.36 431.015   6
  -3  14  10 5613.59 569.634   6
  -3  14  11 5537.01 571.645   6
  -3  14  12 903.652 263.188   6
  -3  15 -10 986.202 278.062   3
  -3  15  -9 6623.20 617.385   4
  -3  15  -9 6700.84 569.838   3
  -3  15  -8 350.338 187.689   3
  -3  15  -7 7348.08 597.178   3
  -3  15  -6 364.990 170.379   3
  -3  15  -5 3273.86 412.656   3
  -3  15  -4 2117.98 334.907   3
  -3  15  -3 2696.29 376.288   3
  -3  15  -2 9421.36 691.619   3
  -3  15  -1 7682.84 625.529   3
  -3  15   0 10785.6 743.430   3
  -3  15   1 2642.74 389.179   3
  -3  15   1 2675.58 377.624   6
  -3  15   2 16318.6 918.932   3
  -3  15   2 15804.2 878.292   6
  -3  15   3 1634.40 296.019   3
  -3  15   3 973.616 247.066   6
  -3  15   4 9467.44 693.142   6
  -3  15   5 2534.89 362.841   6
  -3  15   6 3312.17 426.579   6
  -3  15   7 4801.66 535.376   6
  -3  15   8 2643.93 406.232   6
  -3  15   9 7124.99 641.684   6
  -3  15  10 917.899 284.231   6
  -3  16  -8 1513.24 308.800   3
  -3  16  -7 1295.38 278.685   3
  -3  16  -6 26.9287 167.302   3
  -3  16  -5 8282.97 669.305   3
  -3  16  -4 4187.57 487.642   3
  -3  16  -3 2158.10 374.949   3
  -3  16  -2 4673.21 520.884   3
  -3  16  -1 2335.28 391.896   3
  -3  16  -1 2625.48 370.047   6
  -3  16   0 9132.30 711.230   3
  -3  16   0 8450.88 650.585   6
  -3  16   1-105.277 187.339   3
  -3  16   1 21.4159 188.577   6
  -3  16   2 7159.26 610.076   6
  -3  16   3 2474.93 382.170   6
  -3  16   4 7652.04 642.389   6
  -3  16   5 887.848 254.581   6
  -3  16   6 421.500 209.382   6
  -3  16   7 6710.99 610.923   6
  -3  17  -6 4620.58 540.503   3
  -3  17  -5 635.858 248.265   3
  -3  17  -4 4938.83 539.768   3
  -3  17  -3 269.706 193.339   3
  -3  17  -2 2090.08 378.711   3
  -3  17   1 825.166 260.035   6
  -3  17   2 2628.58 441.674   6
  -3  17   3 2556.24 383.095   6
  -3  17   4 3161.02 424.861   6
  -2 -15  -5 4148.38 459.631   5
  -2 -15  -4 963.644 278.783   5
  -2 -15  -3 7705.68 624.203   5
  -2 -15  -2-22.5392 191.594   5
  -2 -15  -1 3332.86 420.741   5
  -2 -15   0 1379.43 329.428   5
  -2 -15   1 8000.38 649.803   5
  -2 -15   2 1434.36 302.365   5
  -2 -15   3 4774.76 521.340   5
  -2 -14  -8 594.826 199.800   5
  -2 -14  -7 3022.68 399.563   5
  -2 -14  -6 1028.43 288.965   5
  -2 -14  -5 8381.11 635.985   5
  -2 -14  -4 349.637 245.891   5
  -2 -14  -3 8758.43 650.390   5
  -2 -14  -2 535.251 219.735   5
  -2 -14  -1 7515.95 592.515   5
  -2 -14   0 805.650 255.330   5
  -2 -14   1 6018.88 535.866   5
  -2 -14   2 3119.54 439.073   5
  -2 -14   3 5204.81 546.070   5
  -2 -14   4 5899.45 578.572   5
  -2 -14   5 717.579 240.772   5
  -2 -14   6 10102.2 760.052   5
  -2 -14   7-214.865 262.824   5
  -2 -14   8 4679.48 550.858   5
  -2 -14   9 1062.51 330.903   5
  -2 -13  -9 3057.02 391.386   5
  -2 -13  -8 128.157 181.498   5
  -2 -13  -7 2882.42 367.612   5
  -2 -13  -6 468.698 224.793   5
  -2 -13  -5 10456.2 660.652   5
  -2 -13  -4 632.449 256.777   5
  -2 -13  -3 4029.49 425.428   5
  -2 -13  -2 752.917 253.304   5
  -2 -13  -1 5390.68 498.547   5
  -2 -13   0 3314.49 409.630   5
  -2 -13   1 6048.17 521.337   5
  -2 -13   2 6614.77 551.823   5
  -2 -13   3 713.763 251.464   5
  -2 -13   4 8382.60 641.922   5
  -2 -13   5 166.394 197.801   5
  -2 -13   6 8251.46 671.980   5
  -2 -13   7 1480.39 305.852   5
  -2 -13   8 4158.33 480.481   5
  -2 -13   9 1647.40 360.825   5
  -2 -13  10 4848.76 577.775   5
  -2 -13  11 1973.80 387.079   5
  -2 -13  12 148.288 218.522   5
  -2 -12 -13 295.045 193.487   2
  -2 -12 -12 2341.78 387.096   2
  -2 -12 -11 10253.1 700.530   2
  -2 -12 -10 46.0512 183.458   5
  -2 -12 -10-23.1060 155.223   2
  -2 -12  -9 8579.59 586.866   5
  -2 -12  -9 7995.17 576.573   2
  -2 -12  -8 52.3409 153.118   5
  -2 -12  -8-19.6134 120.252   2
  -2 -12  -7 3059.31 358.324   5
  -2 -12  -7 2913.65 331.696   2
  -2 -12  -6 4183.61 426.905   5
  -2 -12  -6 3852.48 367.292   2
  -2 -12  -5 4607.91 373.272   2
  -2 -12  -5 5502.32 470.357   5
  -2 -12  -4 1989.82 306.967   5
  -2 -12  -4 2300.37 253.051   2
  -2 -12  -3 4605.92 429.208   5
  -2 -12  -3 4306.61 324.031   2
  -2 -12  -2 6620.20 524.077   5
  -2 -12  -1 4757.87 456.580   5
  -2 -12   0 8176.57 573.462   5
  -2 -12   1 704.766 207.536   5
  -2 -12   2 7897.45 588.121   5
  -2 -12   3 270.792 207.786   5
  -2 -12   4 12634.8 774.781   5
  -2 -12   5 604.644 251.226   5
  -2 -12   6 7382.13 606.507   5
  -2 -12   7 4256.00 464.363   5
  -2 -12   7 3142.39 353.382   1
  -2 -12   8 4583.32 507.527   5
  -2 -12   8 4166.98 398.653   1
  -2 -12   9 5379.31 560.231   5
  -2 -12   9 4423.56 412.015   1
  -2 -12  10 2653.58 419.148   5
  -2 -12  11 8661.55 705.230   5
  -2 -12  12 182.021 206.110   5
  -2 -12  13 4722.82 557.397   5
  -2 -12  14 390.622 231.413   5
  -2 -12  15 6317.13 640.194   5
  -2 -11 -15 2662.98 385.343   2
  -2 -11 -14 1635.77 307.036   2
  -2 -11 -13 8095.52 649.969   2
  -2 -11 -12 150.729 186.231   2
  -2 -11 -11 12725.2 771.304   2
  -2 -11 -10 261.253 211.681   5
  -2 -11 -10 450.796 211.736   2
  -2 -11  -9 7158.93 541.741   2
  -2 -11  -9 7645.74 528.582   5
  -2 -11  -8 3325.49 356.199   5
  -2 -11  -8 2862.61 333.579   2
  -2 -11  -7 4102.85 384.976   5
  -2 -11  -7 4089.22 378.587   2
  -2 -11  -6 5977.59 437.128   2
  -2 -11  -6 5986.24 464.184   5
  -2 -11  -5 1702.57 265.985   5
  -2 -11  -5 1526.28 218.054   2
  -2 -11  -4 3869.66 388.459   5
  -2 -11  -4 3584.09 310.704   2
  -2 -11  -3 1229.60 242.838   5
  -2 -11  -3 1197.84 179.114   2
  -2 -11  -2 15032.9 737.845   5
  -2 -11  -2 14545.0 583.685   2
  -2 -11  -1 1155.23 241.790   5
  -2 -11  -1 569.827 128.195   2
  -2 -11   0 4636.21 426.684   5
  -2 -11   0 4922.39 320.722   2
  -2 -11   1 255.492 118.656   2
  -2 -11   1 442.925 172.883   5
  -2 -11   2 12344.7 485.317   2
  -2 -11   2 13270.6 727.165   5
  -2 -11   3 326.883 194.599   5
  -2 -11   4 19693.9 925.084   5
  -2 -11   5 1508.71 283.126   5
  -2 -11   6 11759.8 728.698   5
  -2 -11   7 8576.68 644.181   5
  -2 -11   7 9177.21 568.160   1
  -2 -11   8 150.108 224.913   5
  -2 -11   8 510.064 146.448   1
  -2 -11   9 6971.62 583.201   5
  -2 -11   9 7750.96 520.953   1
  -2 -11  10 412.787 155.631   1
  -2 -11  10 546.194 211.412   5
  -2 -11  11 13271.0 692.229   1
  -2 -11  11 14384.4 872.323   5
  -2 -11  12 88.4864 189.139   5
  -2 -11  12 26.0536 107.066   1
  -2 -11  13 6268.27 592.780   5
  -2 -11  14 2210.63 393.345   5
  -2 -11  15 3420.49 441.591   5
  -2 -11  16 3064.10 443.184   5
  -2 -11  17 2180.42 424.331   5
  -2 -10 -16 606.073 269.674   2
  -2 -10 -15 7921.42 701.639   2
  -2 -10 -14 397.286 191.694   2
  -2 -10 -13 8644.44 670.382   2
  -2 -10 -12 719.966 245.216   2
  -2 -10 -11 11433.6 727.955   2
  -2 -10 -11 11522.5 645.353   5
  -2 -10 -10 1980.58 306.510   5
  -2 -10 -10 1422.12 254.576   2
  -2 -10  -9 2431.37 309.996   2
  -2 -10  -9 2677.72 325.488   5
  -2 -10  -8 6268.03 473.676   2
  -2 -10  -8 7375.14 501.346   5
  -2 -10  -7 2713.26 305.474   5
  -2 -10  -7 2899.83 318.696   2
  -2 -10  -6 8833.46 523.859   2
  -2 -10  -6 9437.55 557.393   5
  -2 -10  -5 263.010 135.744   5
  -2 -10  -5 314.371 120.268   2
  -2 -10  -4 14060.1 611.356   2
  -2 -10  -4 14414.2 684.904   5
  -2 -10  -3 476.877 133.122   2
  -2 -10  -3 559.285 182.799   5
  -2 -10  -2 21235.1 851.223   5
  -2 -10  -2 20312.4 689.250   2
  -2 -10  -1 1496.88 184.961   2
  -2 -10  -1 1416.21 253.204   5
  -2 -10   0 29956.7 1043.87   5
  -2 -10   0 29447.4 801.761   2
  -2 -10   1 14332.7 717.593   5
  -2 -10   1 13204.2 509.998   2
  -2 -10   2 2896.01 333.674   5
  -2 -10   2 3421.49 254.137   2
  -2 -10   3 1369.34 249.771   5
  -2 -10   3 1305.38 168.653   2
  -2 -10   4 10427.4 640.592   5
  -2 -10   4 11091.9 435.996   2
  -2 -10   5 2686.67 344.159   5
  -2 -10   6 1574.82 253.460   5
  -2 -10   7 8384.87 602.225   5
  -2 -10   7 8486.33 534.035   1
  -2 -10   8 383.822 163.353   5
  -2 -10   8 304.554 118.075   1
  -2 -10   9 16833.9 869.731   5
  -2 -10   9 18493.8 775.434   1
  -2 -10  10 351.183 135.675   1
  -2 -10  10 196.651 162.775   5
  -2 -10  11 15749.6 855.898   5
  -2 -10  11 14491.1 696.328   1
  -2 -10  12 1034.91 254.423   5
  -2 -10  12 1381.10 231.139   1
  -2 -10  13 9372.03 674.800   5
  -2 -10  13 8189.94 524.932   1
  -2 -10  14 6401.11 577.108   5
  -2 -10  14 5640.03 444.424   1
  -2 -10  15 3456.37 355.609   1
  -2 -10  15 3840.62 466.824   5
  -2 -10  16 10279.0 736.571   5
  -2 -10  17 803.897 279.136   5
  -2 -10  18 8991.30 703.022   5
  -2  -9 -17 7220.55 704.407   2
  -2  -9 -16 1580.57 362.563   2
  -2  -9 -15 8861.31 737.561   2
  -2  -9 -14 2209.48 374.765   2
  -2  -9 -13 12698.1 821.404   2
  -2  -9 -12 1431.68 284.018   2
  -2  -9 -12 1487.33 260.345   5
  -2  -9 -11 6574.72 555.642   2
  -2  -9 -11 7019.82 487.827   5
  -2  -9 -10 6176.99 509.888   2
  -2  -9 -10 6590.67 470.879   5
  -2  -9  -9 2220.88 297.402   5
  -2  -9  -9 1972.49 279.280   2
  -2  -9  -8 14621.2 671.977   5
  -2  -9  -8 13380.8 694.837   2
  -2  -9  -7 1817.88 271.936   5
  -2  -9  -7 1619.18 234.282   2
  -2  -9  -6 31071.8 996.309   2
  -2  -9  -6 30939.3 991.816   5
  -2  -9  -5 173.328 138.048   5
  -2  -9  -5 56.9718 116.028   2
  -2  -9  -4 18078.8 742.387   5
  -2  -9  -4 17689.2 680.319   2
  -2  -9  -3-2.40933 163.193   5
  -2  -9  -3 355.809 142.942   2
  -2  -9  -2 16023.4 701.604   5
  -2  -9  -2 15855.0 598.225   2
  -2  -9  -1 10898.2 590.242   5
  -2  -9  -1 10890.7 477.769   2
  -2  -9   0 5374.44 415.016   5
  -2  -9   0 5908.14 342.012   2
  -2  -9   1 3561.86 340.946   5
  -2  -9   1 4428.73 294.325   2
  -2  -9   2 4049.68 275.116   2
  -2  -9   2 3950.86 374.319   5
  -2  -9   3 10709.2 612.869   5
  -2  -9   3 12594.6 471.072   2
  -2  -9   4 3622.02 365.441   5
  -2  -9   4 3878.92 255.314   2
  -2  -9   5 16768.2 774.049   5
  -2  -9   6 4024.64 401.545   5
  -2  -9   7 4851.43 435.186   5
  -2  -9   7 4757.08 375.593   1
  -2  -9   8 1296.51 244.452   5
  -2  -9   8 594.540 144.877   1
  -2  -9   9 23981.6 974.650   5
  -2  -9   9 22390.9 831.281   1
  -2  -9  10 873.082 176.381   1
  -2  -9  10 895.675 187.390   5
  -2  -9  11 10299.2 566.274   1
  -2  -9  11 10701.9 652.464   5
  -2  -9  12 698.296 220.627   5
  -2  -9  12 556.148 156.530   1
  -2  -9  13 12019.1 712.038   5
  -2  -9  13 11461.1 612.846   1
  -2  -9  14 7567.64 584.922   5
  -2  -9  14 6342.96 459.691   1
  -2  -9  15 3470.82 352.003   1
  -2  -9  15 3969.45 437.970   5
  -2  -9  16 12020.1 753.940   5
  -2  -9  16 10200.3 614.264   1
  -2  -9  17 147.727 189.912   5
  -2  -9  17 447.336 168.659   1
  -2  -9  18 7485.16 542.703   1
  -2  -8 -18 536.370 301.274   2
  -2  -8 -17 6010.25 629.464   2
  -2  -8 -16 457.727 256.849   2
  -2  -8 -15 12679.8 867.956   2
  -2  -8 -14 2934.51 430.167   2
  -2  -8 -13 6714.56 592.362   2
  -2  -8 -12 6676.00 575.075   2
  -2  -8 -12 6736.75 468.078   5
  -2  -8 -11 4488.64 455.767   2
  -2  -8 -11 4880.73 400.797   5
  -2  -8 -10 15391.7 805.054   2
  -2  -8 -10 15889.6 690.374   5
  -2  -8  -9 471.053 166.894   5
  -2  -8  -9 40.5722 115.262   2
  -2  -8  -8 42458.0 1140.99   5
  -2  -8  -8 40162.8 1235.91   2
  -2  -8  -7 331.943 159.187   5
  -2  -8  -7 170.491 153.115   2
  -2  -8  -6 14181.9 632.008   5
  -2  -8  -6 13713.4 641.989   2
  -2  -8  -5 2912.24 280.342   5
  -2  -8  -5 2705.09 274.054   2
  -2  -8  -4 2650.94 274.258   5
  -2  -8  -4 2651.01 268.028   2
  -2  -8  -3 8828.74 485.382   5
  -2  -8  -3 9049.12 459.399   2
  -2  -8  -2 2996.59 293.800   5
  -2  -8  -2 3238.31 268.507   2
  -2  -8  -1 16986.1 699.435   5
  -2  -8  -1 18101.0 612.255   2
  -2  -8   0 5222.99 394.344   5
  -2  -8   0 5664.47 330.035   2
  -2  -8   1 18670.6 745.730   5
  -2  -8   1 21175.7 635.605   2
  -2  -8   2 912.664 141.147   2
  -2  -8   2 641.138 184.581   5
  -2  -8   3 17998.0 750.317   5
  -2  -8   3 19474.1 585.210   2
  -2  -8   4 460.152 162.057   5
  -2  -8   4 291.887 85.7169   2
  -2  -8   5 21582.7 831.779   5
  -2  -8   5 22425.6 628.183   2
  -2  -8   6 486.377 141.514   5
  -2  -8   7 12929.7 653.301   5
  -2  -8   7 12064.1 568.750   1
  -2  -8   8 6713.38 477.347   5
  -2  -8   8 6430.30 421.263   1
  -2  -8   9 16947.2 758.696   5
  -2  -8   9 14520.1 642.017   1
  -2  -8  10 3977.31 368.276   5
  -2  -8  10 3654.47 333.151   1
  -2  -8  11 377.322 138.808   5
  -2  -8  11 287.146 121.468   1
  -2  -8  12 3037.34 333.140   5
  -2  -8  12 3475.70 328.667   1
  -2  -8  13 160.282 152.151   5
  -2  -8  13 51.8346 125.156   1
  -2  -8  14 8674.06 575.153   5
  -2  -8  14 7213.56 480.110   1
  -2  -8  15 2662.38 346.397   5
  -2  -8  15 2202.65 280.647   1
  -2  -8  16 17686.3 857.257   5
  -2  -8  16 15964.2 756.907   1
  -2  -8  17 818.924 193.873   1
  -2  -8  18 5638.23 466.893   1
  -2  -8  19 2115.28 300.805   1
  -2  -8  20 3936.74 409.767   1
  -2  -7 -18 2102.91 424.252   2
  -2  -7 -17 11078.5 857.354   2
  -2  -7 -16 6037.61 625.128   2
  -2  -7 -15 7284.90 653.957   2
  -2  -7 -14 2765.95 410.643   2
  -2  -7 -13 5478.56 402.288   5
  -2  -7 -13 6005.93 563.066   2
  -2  -7 -12 16969.5 904.473   2
  -2  -7 -12 16718.5 702.363   5
  -2  -7 -11 2519.76 285.670   5
  -2  -7 -11 2610.07 351.429   2
  -2  -7 -10 12710.6 585.514   5
  -2  -7 -10 12980.9 733.120   2
  -2  -7  -9 292.229 113.193   5
  -2  -7  -9 390.629 179.843   2
  -2  -7  -8 20669.0 859.278   2
  -2  -7  -8 21065.6 745.666   5
  -2  -7  -7 12073.7 632.314   2
  -2  -7  -7 13078.4 575.343   5
  -2  -7  -6 34044.8 961.583   5
  -2  -7  -6 34428.7 1046.95   2
  -2  -7  -5 16941.3 688.640   2
  -2  -7  -5 16737.9 650.780   5
  -2  -7  -4 7605.77 439.785   2
  -2  -7  -4 7532.84 439.313   5
  -2  -7  -3 40195.5 1010.27   2
  -2  -7  -3 38253.5 1020.31   5
  -2  -7  -2 2843.67 271.529   5
  -2  -7  -2 2898.68 252.080   2
  -2  -7  -1 25044.4 819.752   5
  -2  -7  -1 28676.7 783.180   2
  -2  -7   0 57.9860 110.102   5
  -2  -7   0 281.036 107.315   2
  -2  -7   1 31869.6 946.460   5
  -2  -7   1 36218.0 846.015   2
  -2  -7   2 2939.68 293.776   5
  -2  -7   2 2195.01 194.508   2
  -2  -7   3 27167.0 856.246   5
  -2  -7   3 25831.7 676.733   2
  -2  -7   4 6245.70 408.539   5
  -2  -7   4 6155.77 311.648   2
  -2  -7   5 13964.6 615.490   5
  -2  -7   5 13044.6 464.702   2
  -2  -7   5 13578.0 475.023   3
  -2  -7   6 10930.7 548.604   5
  -2  -7   6 10334.1 394.153   3
  -2  -7   7 10441.2 540.609   5
  -2  -7   7 9920.45 489.632   1
  -2  -7   7 8922.59 338.955   3
  -2  -7   8 1304.99 114.814   3
  -2  -7   8 1387.50 198.410   5
  -2  -7   8 1578.47 204.199   1
  -2  -7   9 2346.27 269.742   5
  -2  -7   9 2406.50 255.413   1
  -2  -7  10 14290.3 656.077   5
  -2  -7  10 15148.5 639.230   1
  -2  -7  11 199.232 138.214   5
  -2  -7  11 238.188 121.942   1
  -2  -7  12 11960.7 621.167   5
  -2  -7  12 11583.6 570.901   1
  -2  -7  13 1545.58 246.666   5
  -2  -7  13 1230.81 205.904   1
  -2  -7  14 26561.6 976.095   5
  -2  -7  14 26945.8 926.393   1
  -2  -7  15 1045.02 235.656   5
  -2  -7  15 1195.34 216.002   1
  -2  -7  16 8331.27 566.937   5
  -2  -7  16 7744.80 511.300   1
  -2  -7  17 2607.94 311.861   1
  -2  -7  18 3108.00 337.203   1
  -2  -7  19 3143.97 359.372   1
  -2  -7  20 1048.11 253.206   1
  -2  -7  21 6297.39 534.608   1
  -2  -7  22-715.852 235.574   1
  -2  -6 -19 5721.50 670.086   2
  -2  -6 -18 2916.59 479.242   2
  -2  -6 -17 14304.9 958.407   2
  -2  -6 -16 7733.96 696.800   2
  -2  -6 -15 3040.74 437.317   2
  -2  -6 -14 5880.60 556.416   2
  -2  -6 -13 1548.34 304.747   2
  -2  -6 -13 1798.16 226.777   5
  -2  -6 -12 18508.9 933.674   2
  -2  -6 -12 18559.9 700.674   5
  -2  -6 -11 88.2055 161.741   2
  -2  -6 -11 216.652 152.671   5
  -2  -6 -10 26683.6 1046.27   2
  -2  -6 -10 25272.4 803.913   5
  -2  -6  -9 4893.34 442.495   2
  -2  -6  -9 4600.30 330.537   5
  -2  -6  -8 21713.4 880.705   2
  -2  -6  -8 21888.7 727.522   5
  -2  -6  -7 23268.5 875.815   2
  -2  -6  -7 23974.2 749.531   5
  -2  -6  -6 21900.5 816.702   2
  -2  -6  -6 22607.5 725.326   5
  -2  -6  -5 18293.8 712.696   2
  -2  -6  -5 17880.6 640.872   5
  -2  -6  -4 414.052 117.389   5
  -2  -6  -4 407.901 122.499   2
  -2  -6  -3 48179.7 1110.02   5
  -2  -6  -3 52937.2 1172.93   2
  -2  -6  -2 81.2369 99.0490   5
  -2  -6  -2 88.4305 104.509   2
  -2  -6  -1 54630.0 1213.27   5
  -2  -6  -1 65926.9 1249.14   2
  -2  -6   0 31.5415 94.6738   5
  -2  -6   0 134.574 89.9586   2
  -2  -6   0 70.2556 56.3490   6
  -2  -6   1 22361.4 711.520   5
  -2  -6   1 22201.7 632.559   2
  -2  -6   2 21268.0 688.180   5
  -2  -6   2 19296.3 573.567   2
  -2  -6   3 11403.3 502.327   5
  -2  -6   3 10189.7 398.327   2
  -2  -6   3 10795.3 417.236   3
  -2  -6   4 47008.8 1082.38   5
  -2  -6   4 44900.6 912.035   2
  -2  -6   4 47069.4 921.740   3
  -2  -6   5 2431.28 253.380   5
  -2  -6   5 2169.53 191.867   2
  -2  -6   5 2703.74 200.338   3
  -2  -6   6 14286.5 577.428   5
  -2  -6   6 13005.7 400.625   3
  -2  -6   7 9266.34 470.247   5
  -2  -6   7 8698.23 292.030   3
  -2  -6   7 9157.82 447.503   1
  -2  -6   8 22000.0 736.825   5
  -2  -6   8 19250.0 406.694   3
  -2  -6   8 22649.1 720.511   1
  -2  -6   9 3018.17 268.206   1
  -2  -6   9 3331.59 309.172   5
  -2  -6  10 16617.8 667.848   5
  -2  -6  10 17074.3 654.293   1
  -2  -6  11 424.121 146.274   5
  -2  -6  11 509.235 148.700   1
  -2  -6  12 13513.7 626.714   5
  -2  -6  12 13477.1 600.819   1
  -2  -6  13 2172.04 275.278   5
  -2  -6  13 2280.37 261.189   1
  -2  -6  14 7247.81 481.754   5
  -2  -6  14 6929.73 446.829   1
  -2  -6  15 4162.47 360.954   1
  -2  -6  16 8065.18 512.091   1
  -2  -6  17 6467.60 476.890   1
  -2  -6  18 1152.03 225.426   1
  -2  -6  19 6309.44 489.202   1
  -2  -6  20 168.587 120.405   1
  -2  -6  21 5037.27 485.011   1
  -2  -6  22 470.013 189.086   1
  -2  -6  23 6402.62 570.474   1
  -2  -5 -20 1978.27 408.953   2
  -2  -5 -19 4628.19 582.216   2
  -2  -5 -18 9010.04 789.187   2
  -2  -5 -17 1676.47 373.092   2
  -2  -5 -16 9643.29 760.398   2
  -2  -5 -15 131.633 169.836   2
  -2  -5 -14 16435.0 931.976   2
  -2  -5 -14 17189.6 629.137   5
  -2  -5 -13 301.723 169.789   2
  -2  -5 -13-147.738 142.248   5
  -2  -5 -12 30512.0 1199.91   2
  -2  -5 -12 28754.9 809.768   5
  -2  -5 -11 1745.30 200.887   5
  -2  -5 -11 1980.64 320.677   2
  -2  -5 -10 23672.7 975.901   2
  -2  -5 -10 21693.5 692.405   5
  -2  -5  -9 8856.20 429.752   5
  -2  -5  -9 9114.14 584.694   2
  -2  -5  -8 18403.5 800.186   2
  -2  -5  -8 17715.8 612.307   5
  -2  -5  -7 25925.6 926.429   2
  -2  -5  -7 25067.8 727.818   5
  -2  -5  -6 1955.79 208.597   5
  -2  -5  -6 2020.58 270.035   2
  -2  -5  -5 49714.2 1222.74   2
  -2  -5  -5 47896.9 1043.42   5
  -2  -5  -4 1744.23 191.688   5
  -2  -5  -4 2110.31 236.718   2
  -2  -5  -3 58558.2 1234.29   2
  -2  -5  -3 51219.1 1084.77   5
  -2  -5  -2 71.2015 95.3461   5
  -2  -5  -2 238.162 98.5894   2
  -2  -5  -1 90396.5 1480.85   6
  -2  -5  -1 90611.2 1530.90   5
  -2  -5   0 18785.5 591.584   5
  -2  -5   0 18761.9 535.243   6
  -2  -5   0 18604.5 584.935   2
  -2  -5   1 15253.9 481.937   3
  -2  -5   1 15130.7 523.414   5
  -2  -5   1 14139.2 485.244   2
  -2  -5   1 14961.2 440.983   6
  -2  -5   2 54097.2 977.902   3
  -2  -5   2 55970.2 1094.87   5
  -2  -5   2 51288.5 993.843   2
  -2  -5   2 52384.8 893.347   6
  -2  -5   3 22314.0 657.264   5
  -2  -5   3 21398.3 578.197   2
  -2  -5   3 22044.1 557.616   3
  -2  -5   4 75726.2 1351.02   5
  -2  -5   4 75783.1 1170.77   3
  -2  -5   4 74001.6 1230.37   2
  -2  -5   5 697.637 97.0387   3
  -2  -5   5 899.104 151.070   5
  -2  -5   5 695.483 108.581   2
  -2  -5   6 47671.6 1043.80   5
  -2  -5   6 46504.3 762.081   3
  -2  -5   7 1365.64 199.669   5
  -2  -5   7 1276.07 163.652   1
  -2  -5   7 1098.07 81.2389   3
  -2  -5   8 34047.9 897.590   5
  -2  -5   8 35995.2 901.538   1
  -2  -5   9 579.299 137.748   1
  -2  -5   9 360.855 114.689   5
  -2  -5  10 16682.4 634.343   5
  -2  -5  10 16831.4 625.571   1
  -2  -5  11 2890.75 265.982   5
  -2  -5  11 3205.43 282.485   1
  -2  -5  12 10815.9 535.319   5
  -2  -5  12 11948.6 545.102   1
  -2  -5  13 12809.9 605.798   5
  -2  -5  13 13065.9 590.223   1
  -2  -5  14 4331.17 348.241   1
  -2  -5  15 7225.10 462.304   1
  -2  -5  16 3094.54 318.943   1
  -2  -5  17 9415.81 555.787   1
  -2  -5  18 2061.43 281.877   1
  -2  -5  19 8118.96 558.858   1
  -2  -5  20-92.8817 148.846   1
  -2  -5  21 6547.83 536.308   1
  -2  -5  22 3524.42 410.611   1
  -2  -5  23 7299.62 599.911   1
  -2  -5  24 1560.97 311.360   1
  -2  -4 -21 1651.56 412.438   2
  -2  -4 -20 1435.64 353.801   2
  -2  -4 -19 333.380 226.347   2
  -2  -4 -18 9674.78 807.104   2
  -2  -4 -17 1035.21 336.221   2
  -2  -4 -16 11805.8 834.539   2
  -2  -4 -15 763.786 249.782   2
  -2  -4 -14 12026.4 782.322   2
  -2  -4 -14 11389.8 462.430   5
  -2  -4 -13 3865.05 449.650   2
  -2  -4 -13 3532.93 246.128   5
  -2  -4 -12 17458.5 890.953   2
  -2  -4 -12 16490.7 539.460   5
  -2  -4 -11 6307.53 530.427   2
  -2  -4 -11 6351.19 321.303   5
  -2  -4 -10 19920.9 898.540   2
  -2  -4 -10 20649.1 603.257   5
  -2  -4  -9 8928.44 576.584   2
  -2  -4  -9 8689.07 390.665   5
  -2  -4  -8 18342.8 803.293   2
  -2  -4  -8 18585.3 575.538   5
  -2  -4  -7 39844.9 886.041   5
  -2  -4  -7 41459.5 1189.77   2
  -2  -4  -6 3746.68 349.038   2
  -2  -4  -6 3572.56 246.382   5
  -2  -4  -5 42884.8 1127.88   2
  -2  -4  -5 41797.8 890.952   5
  -2  -4  -4 4116.17 316.494   2
  -2  -4  -4 3913.46 253.317   5
  -2  -4  -3 53812.9 1170.20   2
  -2  -4  -3 47594.4 950.602   5
  -2  -4  -2 8040.06 346.189   6
  -2  -4  -2 7969.46 341.919   5
  -2  -4  -2 8372.53 410.978   2
  -2  -4  -2 7704.48 319.777   4
  -2  -4  -1 57793.1 1020.68   4
  -2  -4  -1 55052.5 1114.46   2
  -2  -4  -1 55612.7 999.860   6
  -2  -4  -1 59138.1 1031.82   5
  -2  -4   0 58522.3 1046.85   4
  -2  -4   0 56942.2 973.768   6
  -2  -4   0 61312.3 1043.61   5
  -2  -4   1 19730.3 542.041   5
  -2  -4   1 19137.4 558.568   4
  -2  -4   1 19117.6 466.216   6
  -2  -4   1 18408.0 541.334   2
  -2  -4   2 39357.0 808.196   5
  -2  -4   2 37576.3 842.166   4
  -2  -4   2 38307.1 796.299   2
  -2  -4   2 38301.6 665.342   6
  -2  -4   3 935.211 106.337   3
  -2  -4   3 640.424 100.215   2
  -2  -4   3 868.208 134.976   5
  -2  -4   3 813.023 84.6409   6
  -2  -4   4 36132.5 809.995   5
  -2  -4   4 35789.3 547.567   6
  -2  -4   4 37557.2 769.881   2
  -2  -4   4 36850.8 660.957   3
  -2  -4   5 1327.71 181.467   5
  -2  -4   5 1201.13 141.894   2
  -2  -4   5 1541.49 120.476   3
  -2  -4   6 54380.3 1073.22   5
  -2  -4   6 56831.9 1099.81   1
  -2  -4   6 54117.2 747.846   3
  -2  -4   7 2877.02 245.152   5
  -2  -4   7 2811.87 227.384   1
  -2  -4   7 2455.95 83.3095   3
  -2  -4   8 51916.3 1099.95   5
  -2  -4   8 53761.8 1108.85   1
  -2  -4   9 5904.81 353.981   5
  -2  -4   9 6267.73 358.546   1
  -2  -4  10 12948.0 539.716   5
  -2  -4  10 13672.4 540.900   1
  -2  -4  11 7815.26 418.944   1
  -2  -4  11 7789.68 435.083   5
  -2  -4  12 4893.49 346.206   5
  -2  -4  12 5226.21 352.899   1
  -2  -4  13 8678.44 467.062   1
  -2  -4  14 366.610 109.925   1
  -2  -4  15 10220.7 539.227   1
  -2  -4  16 126.965 94.2938   1
  -2  -4  17 8942.19 538.468   1
  -2  -4  18-165.474 146.093   1
  -2  -4  19 12063.4 669.736   1
  -2  -4  20 3120.02 359.130   1
  -2  -4  21 2775.03 363.277   1
  -2  -4  22 1408.06 276.318   1
  -2  -4  23 1179.89 273.181   1
  -2  -4  24 2227.76 342.050   1
  -2  -3 -22 7596.41 638.686   8
  -2  -3 -21-94.6496 174.012   8
  -2  -3 -21-24.9522 256.450   2
  -2  -3 -20 4888.36 484.002   8
  -2  -3 -20 4943.27 615.430   2
  -2  -3 -19 174.459 203.857   2
  -2  -3 -19-214.674 192.693   8
  -2  -3 -18 6354.23 658.120   2
  -2  -3 -18 6555.69 517.550   8
  -2  -3 -17 452.450 174.042   8
  -2  -3 -17 532.125 246.288   2
  -2  -3 -16 9728.10 756.715   2
  -2  -3 -16 11033.6 629.941   8
  -2  -3 -15 969.207 131.442   5
  -2  -3 -15 907.896 248.302   2
  -2  -3 -15 1377.25 227.742   8
  -2  -3 -14 9538.79 694.276   2
  -2  -3 -14 10195.2 559.631   8
  -2  -3 -14 8863.12 362.079   5
  -2  -3 -13 16424.7 886.013   2
  -2  -3 -13 17520.3 513.257   5
  -2  -3 -13 18367.8 732.462   8
  -2  -3 -12 18675.3 915.117   2
  -2  -3 -12 19073.7 725.876   8
  -2  -3 -12 18491.2 516.105   5
  -2  -3 -11 19558.9 912.193   2
  -2  -3 -11 20426.1 728.021   8
  -2  -3 -11 19690.3 524.232   5
  -2  -3 -10 3733.54 400.439   2
  -2  -3 -10 3589.47 206.925   5
  -2  -3  -9 25156.9 593.300   5
  -2  -3  -9 25163.3 966.008   2
  -2  -3  -8 3449.84 357.948   2
  -2  -3  -8 3226.34 203.656   5
  -2  -3  -7 25447.6 904.818   2
  -2  -3  -7 24655.9 607.314   5
  -2  -3  -6 5050.72 387.799   2
  -2  -3  -6 5275.60 263.162   5
  -2  -3  -5 10085.4 294.499   4
  -2  -3  -5 10127.3 522.794   2
  -2  -3  -5 10353.4 364.932   5
  -2  -3  -4 9555.96 297.169   4
  -2  -3  -4 9648.09 485.603   2
  -2  -3  -4 9806.16 342.127   5
  -2  -3  -3 38409.3 723.964   5
  -2  -3  -3 38290.0 960.654   2
  -2  -3  -3 39166.3 700.692   4
  -2  -3  -3 38810.1 816.846   6
  -2  -3  -2 41691.6 965.408   2
  -2  -3  -2 45643.6 778.561   5
  -2  -3  -2 44966.5 782.751   4
  -2  -3  -2 44318.6 850.166   6
  -2  -3  -1 27319.6 564.545   5
  -2  -3  -1 26937.0 595.395   6
  -2  -3  -1 26830.3 583.818   4
  -2  -3  -1 24253.1 675.506   2
  -2  -3   0 70180.0 1051.80   5
  -2  -3   0 69598.5 1045.80   6
  -2  -3   0 66206.9 1175.83   2
  -2  -3   0 70283.7 1104.22   4
  -2  -3   1 8358.67 305.152   5
  -2  -3   1 8262.02 327.073   4
  -2  -3   1 8380.12 273.699   6
  -2  -3   1 8309.90 336.327   2
  -2  -3   2 59774.9 989.368   5
  -2  -3   2 60117.4 853.192   6
  -2  -3   2 60760.2 1050.57   4
  -2  -3   2 61686.2 1028.67   2
  -2  -3   3 26.5785 56.1350   2
  -2  -3   3 11.7333 64.2293   5
  -2  -3   3 54.6304 56.5652   4
  -2  -3   3 67.7185 39.3283   6
  -2  -3   4 71970.9 1176.38   5
  -2  -3   4 70660.8 1229.08   4
  -2  -3   4 73219.7 875.708   6
  -2  -3   4 74334.3 1170.55   2
  -2  -3   5 18193.6 530.129   5
  -2  -3   5 18427.9 346.554   3
  -2  -3   5 18485.0 270.534   6
  -2  -3   6 55428.5 1045.36   1
  -2  -3   6 52442.8 1017.38   5
  -2  -3   7 38927.4 876.980   5
  -2  -3   7 41743.5 899.325   1
  -2  -3   8 51250.0 1065.55   5
  -2  -3   8 53824.9 1081.33   1
  -2  -3   9 26599.8 751.734   5
  -2  -3   9 28068.1 758.596   1
  -2  -3  10 465.906 115.530   1
  -2  -3  10 181.421 86.2669   5
  -2  -3  10 250.248 25.4646   6
  -2  -3  11 29656.4 428.418   6
  -2  -3  11 33654.3 875.409   1
  -2  -3  12 1279.19 168.856   1
  -2  -3  12 1588.06 87.1180   6
  -2  -3  13 17053.1 649.513   1
  -2  -3  13 15267.9 330.342   6
  -2  -3  14 449.493 62.2139   6
  -2  -3  14 304.623 115.842   1
  -2  -3  15 9310.74 286.085   6
  -2  -3  15 10800.5 548.133   1
  -2  -3  16 1666.64 229.793   1
  -2  -3  16 1855.87 134.113   6
  -2  -3  17 6898.25 467.047   1
  -2  -3  18 3031.55 334.819   1
  -2  -3  19 6508.53 485.680   1
  -2  -3  20 3412.10 370.232   1
  -2  -3  21 1185.48 244.458   1
  -2  -3  22 2809.44 357.410   1
  -2  -3  23 326.381 184.495   1
  -2  -3  24 5099.00 510.514   1
  -2  -2 -22 8551.07 838.641   2
  -2  -2 -22 9317.16 670.953   8
  -2  -2 -21 18.7236 145.039   8
  -2  -2 -21 238.188 226.371   2
  -2  -2 -20 8421.70 600.374   8
  -2  -2 -20 7625.17 756.994   2
  -2  -2 -19 2158.18 409.482   2
  -2  -2 -19 2423.83 328.004   8
  -2  -2 -18 15014.4 997.361   2
  -2  -2 -18 15390.4 765.574   8
  -2  -2 -17 5607.91 600.310   2
  -2  -2 -17 6095.27 457.457   8
  -2  -2 -16 5628.88 585.226   2
  -2  -2 -16 6151.79 453.181   8
  -2  -2 -15 10476.7 748.000   2
  -2  -2 -15 11527.5 593.287   8
  -2  -2 -14 5959.08 548.654   2
  -2  -2 -14 6936.55 443.786   8
  -2  -2 -13 22220.0 1024.33   2
  -2  -2 -13 23825.1 804.751   8
  -2  -2 -12 4108.54 211.711   5
  -2  -2 -12 4552.55 458.283   2
  -2  -2 -12 4318.43 333.320   8
  -2  -2 -11 1013.24 160.961   8
  -2  -2 -11 1001.41 240.803   2
  -2  -2 -11 1227.06 114.809   5
  -2  -2 -10 4986.94 220.231   5
  -2  -2 -10 5549.50 343.848   8
  -2  -2 -10 5429.85 460.778   2
  -2  -2  -9 31553.8 1076.27   2
  -2  -2  -9 32236.7 833.196   8
  -2  -2  -9 31421.4 588.503   5
  -2  -2  -8 1526.50 117.585   5
  -2  -2  -8 1380.13 170.355   8
  -2  -2  -8 1528.80 246.404   2
  -2  -2  -7 41031.2 1154.71   2
  -2  -2  -7 41298.5 556.625   4
  -2  -2  -7 40777.8 701.564   5
  -2  -2  -6 8801.82 291.492   5
  -2  -2  -6 9740.97 234.069   4
  -2  -2  -6 9235.25 519.643   2
  -2  -2  -5 51211.2 721.657   4
  -2  -2  -5 49755.2 1204.71   2
  -2  -2  -5 49006.9 782.458   5
  -2  -2  -4 34693.7 568.945   4
  -2  -2  -4 33204.6 746.047   6
  -2  -2  -4 32293.0 901.477   2
  -2  -2  -4 34656.5 576.599   5
  -2  -2  -3 18590.5 624.875   2
  -2  -2  -3 19793.9 526.389   6
  -2  -2  -3 20252.5 391.968   5
  -2  -2  -3 19749.7 415.509   4
  -2  -2  -2 59945.0 827.714   5
  -2  -2  -2 60899.3 991.230   6
  -2  -2  -2 56276.8 1123.29   2
  -2  -2  -2 61962.8 894.820   4
  -2  -2  -1 793.420 85.1705   5
  -2  -2  -1 819.962 95.9939   4
  -2  -2  -1 817.645 127.176   2
  -2  -2  -1 867.212 105.246   6
  -2  -2   0 75517.9 1028.89   5
  -2  -2   0 77255.0 1220.75   2
  -2  -2   0 76177.9 1070.68   6
  -2  -2   0 75504.0 1100.13   4
  -2  -2   1 1463.09 131.454   2
  -2  -2   1 1379.29 117.941   5
  -2  -2   1 1615.17 109.699   6
  -2  -2   1 1560.58 134.449   4
  -2  -2   2 89821.9 1249.40   5
  -2  -2   2 90602.2 1305.08   4
  -2  -2   2 91646.0 1316.33   2
  -2  -2   2 90944.7 1126.83   6
  -2  -2   3 10433.5 341.454   5
  -2  -2   3 10399.1 238.766   6
  -2  -2   3 10043.4 345.352   2
  -2  -2   3 10787.4 361.597   4
  -2  -2   4 63608.2 1044.45   5
  -2  -2   4 64386.5 1070.58   4
  -2  -2   4 64845.2 791.350   6
  -2  -2   4 65498.8 1062.16   2
  -2  -2   5 33315.8 706.794   5
  -2  -2   5 33217.1 726.218   1
  -2  -2   5 31599.1 440.402   6
  -2  -2   5 33083.9 714.096   4
  -2  -2   6 10031.1 390.033   5
  -2  -2   6 9841.55 384.196   1
  -2  -2   6 10098.4 385.080   4
  -2  -2   7 59557.0 1094.51   5
  -2  -2   7 59629.1 1083.98   4
  -2  -2   7 61552.3 1114.86   1
  -2  -2   7 58347.2 752.180   6
  -2  -2   8 4105.92 267.108   1
  -2  -2   8 4177.51 140.949   6
  -2  -2   9 71010.0 913.345   6
  -2  -2   9 72172.3 1305.71   1
  -2  -2  10 1190.14 162.244   1
  -2  -2  10 1349.61 97.1117   6
  -2  -2  11 56448.3 831.081   6
  -2  -2  11 56348.9 1182.64   1
  -2  -2  12 69.1968 75.4087   1
  -2  -2  12 61.6882 52.4311   6
  -2  -2  13 27827.8 573.038   6
  -2  -2  13 28564.4 849.150   1
  -2  -2  14 219.930 111.471   1
  -2  -2  14 286.972 79.4476   6
  -2  -2  15 845.634 163.611   1
  -2  -2  15 780.719 103.881   6
  -2  -2  16 17951.3 501.860   6
  -2  -2  16 18929.8 748.873   1
  -2  -2  17 6386.82 449.624   1
  -2  -2  17 5464.62 282.246   6
  -2  -2  18 10809.5 602.059   1
  -2  -2  18 9436.88 384.191   6
  -2  -2  19 1577.31 240.247   1
  -2  -2  20 3419.08 371.767   1
  -2  -2  21-80.1843 147.572   1
  -2  -2  22 2729.54 359.776   1
  -2  -2  23-429.747 217.439   1
  -2  -2  24 4443.92 481.099   1
  -2  -1 -23-163.263 168.124   8
  -2  -1 -22 7771.08 605.534   8
  -2  -1 -22 5962.05 699.364   2
  -2  -1 -21 3287.16 382.120   8
  -2  -1 -21 2358.28 453.163   2
  -2  -1 -20 10541.7 877.643   2
  -2  -1 -20 11625.2 696.211   8
  -2  -1 -19 9361.33 791.590   2
  -2  -1 -19 9617.83 605.198   8
  -2  -1 -18 3274.29 350.792   8
  -2  -1 -18 2938.14 457.571   2
  -2  -1 -17 7909.54 694.560   2
  -2  -1 -17 8406.35 526.582   8
  -2  -1 -16 1750.93 367.514   2
  -2  -1 -16 1471.99 225.855   8
  -2  -1 -15 14498.6 877.569   2
  -2  -1 -15 14594.8 646.569   8
  -2  -1 -14 69.1442 170.201   2
  -2  -1 -14 87.4178 109.570   8
  -2  -1 -13 18801.4 460.432   5
  -2  -1 -13 18903.1 926.878   2
  -2  -1 -13 19414.6 695.274   8
  -2  -1 -12 4132.74 198.007   5
  -2  -1 -12 4085.61 439.907   2
  -2  -1 -12 4410.30 317.157   8
  -2  -1 -11 27117.3 517.912   5
  -2  -1 -11 27494.6 1047.74   2
  -2  -1 -11 27472.6 777.650   8
  -2  -1 -10 3803.89 165.130   5
  -2  -1 -10 3579.83 384.299   2
  -2  -1 -10 3909.33 278.731   8
  -2  -1  -9 25924.5 448.253   5
  -2  -1  -9 23729.9 909.461   2
  -2  -1  -9 25654.8 696.841   8
  -2  -1  -8 6295.73 451.120   2
  -2  -1  -8 6569.92 141.033   4
  -2  -1  -8 6543.63 325.826   8
  -2  -1  -7 49675.5 630.323   4
  -2  -1  -7 48267.8 949.287   8
  -2  -1  -7 46508.2 1223.14   2
  -2  -1  -7 49179.0 660.499   5
  -2  -1  -6 16138.8 664.862   2
  -2  -1  -6 17145.2 328.690   5
  -2  -1  -6 17656.5 319.394   4
  -2  -1  -5 4774.86 160.106   4
  -2  -1  -5 4789.54 345.652   2
  -2  -1  -5 4730.17 264.167   6
  -2  -1  -5 5052.12 135.639   5
  -2  -1  -4 60778.3 688.079   5
  -2  -1  -4 55487.9 1201.00   2
  -2  -1  -4 60491.1 815.424   4
  -2  -1  -4 60023.5 1033.01   6
  -2  -1  -3 4883.69 123.362   5
  -2  -1  -3 5030.22 242.450   6
  -2  -1  -3 4621.77 290.422   2
  -2  -1  -3 5003.48 179.403   4
  -2  -1  -2 51040.1 640.870   5
  -2  -1  -2 51039.3 756.333   4
  -2  -1  -2 50451.1 847.184   6
  -2  -1  -2 50883.5 978.582   2
  -2  -1  -1 988.391 70.8094   5
  -2  -1  -1 981.442 88.0741   4
  -2  -1  -1 1258.72 136.005   2
  -2  -1  -1 1114.51 105.334   6
  -2  -1   0 31974.5 515.930   5
  -2  -1   0 33796.5 673.582   2
  -2  -1   0 31914.1 586.394   4
  -2  -1   0 33731.8 582.870   6
  -2  -1   1 57250.9 822.273   5
  -2  -1   1 58352.6 938.827   2
  -2  -1   1 57787.6 882.680   4
  -2  -1   1 58473.8 818.999   6
  -2  -1   2 87362.3 1176.41   5
  -2  -1   2 88380.6 1257.57   2
  -2  -1   2 89095.4 1094.00   6
  -2  -1   2 89350.0 1228.32   4
  -2  -1   3 87789.2 1226.03   5
  -2  -1   3 90627.7 1261.55   4
  -2  -1   3 89040.3 1073.52   6
  -2  -1   3 89447.2 1283.54   2
  -2  -1   4 41658.8 767.639   5
  -2  -1   4 42350.4 795.108   1
  -2  -1   4 41623.1 787.591   2
  -2  -1   4 41690.8 766.954   4
  -2  -1   5 51008.2 907.759   1
  -2  -1   5 50291.3 868.435   4
  -2  -1   5 48066.5 578.836   3
  -2  -1   6 3970.98 220.530   4
  -2  -1   6 4029.84 235.049   1
  -2  -1   7 71245.9 1156.58   4
  -2  -1   7 72307.7 1227.67   1
  -2  -1   8 6867.40 306.016   4
  -2  -1   8 7138.29 243.684   6
  -2  -1   8 7108.34 339.188   1
  -2  -1   9 98361.7 1502.58   4
  -2  -1   9 99365.5 1593.39   1
  -2  -1   9 98307.8 1309.23   6
  -2  -1  10 4040.85 277.505   1
  -2  -1  10 3758.66 191.520   6
  -2  -1  11 51253.4 868.324   6
  -2  -1  11 52170.3 1118.75   1
  -2  -1  12 5481.28 350.892   1
  -2  -1  12 5619.32 255.672   6
  -2  -1  13 20768.1 538.314   6
  -2  -1  13 20471.4 706.527   1
  -2  -1  14 16799.2 499.199   6
  -2  -1  14 18012.0 678.273   1
  -2  -1  15 6958.76 323.213   6
  -2  -1  15 6829.38 427.879   1
  -2  -1  16 23886.2 848.435   1
  -2  -1  16 23726.1 650.591   6
  -2  -1  17 60.3356 68.4300   6
  -2  -1  17 163.279 128.994   1
  -2  -1  18 18990.1 806.611   1
  -2  -1  18 18394.7 601.055   6
  -2  -1  19 184.520 71.6809   6
  -2  -1  19 598.396 173.634   1
  -2  -1  20 8733.26 580.794   1
  -2  -1  21 875.882 225.256   1
  -2  -1  22 4307.29 439.503   1
  -2  -1  23 116.160 169.904   1
  -2  -1  24 2713.02 359.565   1
  -2   0 -23 1558.81 295.563   8
  -2   0 -23 929.334 336.908   2
  -2   0 -22 5616.86 499.262   8
  -2   0 -22 4695.28 599.126   2
  -2   0 -21 6352.12 512.100   8
  -2   0 -21 5429.56 639.001   2
  -2   0 -20 5915.18 481.200   8
  -2   0 -20 4839.25 596.474   2
  -2   0 -19 6991.40 680.245   2
  -2   0 -19 7778.03 528.657   8
  -2   0 -18 519.269 171.835   8
  -2   0 -18 610.949 259.441   2
  -2   0 -17 21129.4 1098.42   2
  -2   0 -17 22567.2 844.392   8
  -2   0 -16-132.214 154.618   2
  -2   0 -16 24.3811 92.0566   8
  -2   0 -15 29118.5 1217.52   2
  -2   0 -15 31023.6 929.369   8
  -2   0 -14 215.204 110.558   8
  -2   0 -14 303.667 202.634   2
  -2   0 -13 34381.9 654.469   5
  -2   0 -13 32810.6 1214.78   2
  -2   0 -13 35357.6 928.683   8
  -2   0 -12 4087.97 196.411   5
  -2   0 -12 3900.02 426.459   2
  -2   0 -12 4881.92 323.683   8
  -2   0 -11 28682.5 476.172   5
  -2   0 -11 27436.4 1005.15   2
  -2   0 -11 28275.7 724.542   8
  -2   0 -10 14631.2 326.809   5
  -2   0 -10 14862.8 717.540   2
  -2   0 -10 14925.1 517.487   8
  -2   0 -10 14229.3 257.767   4
  -2   0  -9 8634.29 222.506   5
  -2   0  -9 8912.91 206.358   4
  -2   0  -9 8218.27 517.947   2
  -2   0  -9 9003.60 375.206   8
  -2   0  -8 39155.3 538.094   5
  -2   0  -8 36263.8 1078.06   2
  -2   0  -8 40173.6 567.752   4
  -2   0  -8 38940.6 811.840   8
  -2   0  -7 14060.8 231.363   5
  -2   0  -7 14544.4 296.831   4
  -2   0  -7 13116.4 605.780   2
  -2   0  -7 14142.8 433.800   8
  -2   0  -7 13784.5 466.002   1
  -2   0  -6 48241.7 668.625   4
  -2   0  -6 43756.0 1104.42   2
  -2   0  -6 46637.8 921.437   6
  -2   0  -6 46186.5 902.715   1
  -2   0  -6 45532.3 833.697   8
  -2   0  -5 1077.27 127.231   6
  -2   0  -5 924.507 77.1875   4
  -2   0  -5 944.975 163.667   2
  -2   0  -4 17802.3 472.143   6
  -2   0  -4 17740.9 357.910   4
  -2   0  -4 16823.8 563.234   2
  -2   0  -3 6500.31 206.401   4
  -2   0  -3 6872.06 268.133   6
  -2   0  -3 6415.50 314.872   2
  -2   0  -2 6257.52 206.066   4
  -2   0  -2 6070.95 279.439   2
  -2   0  -2 6294.73 245.538   6
  -2   0  -1 538.025 81.9995   2
  -2   0  -1 530.686 65.6966   4
  -2   0  -1 589.515 73.2858   6
  -2   0   0 475.075 79.3781   2
  -2   0   0 399.153 57.7393   4
  -2   0   0 454.565 65.5355   6
  -2   0   1 52691.6 803.196   4
  -2   0   1 52491.1 847.384   2
  -2   0   1 53194.2 761.199   6
  -2   0   2 999999. 10086.7   4
  -2   0   3 125916. 1592.08   4
  -2   0   3 126501. 1646.61   2
  -2   0   4 22795.9 504.904   4
  -2   0   4 23441.1 533.746   1
  -2   0   4 22010.4 373.342   3
  -2   0   5 52365.2 918.805   1
  -2   0   5 52479.3 691.920   3
  -2   0   5 52536.5 867.795   4
  -2   0   6 167.007 48.1236   3
  -2   0   6 240.179 83.2879   1
  -2   0   6 127.881 59.9482   4
  -2   0   7 79111.5 1295.98   1
  -2   0   7 81758.4 1215.54   4
  -2   0   8 8991.44 380.222   1
  -2   0   8 9058.33 333.099   4
  -2   0   9 66787.2 1219.08   1
  -2   0   9 66786.2 1079.08   6
  -2   0   9 64134.6 1085.11   4
  -2   0  10 21769.8 656.125   1
  -2   0  10 21800.7 554.123   6
  -2   0  10 21493.3 564.858   4
  -2   0  11 57348.6 1016.33   6
  -2   0  11 55892.0 1033.55   4
  -2   0  11 56984.7 1180.54   1
  -2   0  12 21001.6 571.713   6
  -2   0  12 20315.8 677.982   1
  -2   0  13 14790.6 490.145   6
  -2   0  13 14978.8 595.771   1
  -2   0  14 25407.4 818.659   1
  -2   0  14 25488.3 683.069   6
  -2   0  15 3019.30 293.905   1
  -2   0  15 3529.80 252.662   6
  -2   0  16 17932.7 732.360   1
  -2   0  16 17080.3 585.801   6
  -2   0  17 153.435 110.861   1
  -2   0  17 37.8872 70.1384   6
  -2   0  18 19265.3 809.239   1
  -2   0  18 18949.7 658.381   6
  -2   0  19 35.5309 109.143   1
  -2   0  19 87.4343 81.1477   6
  -2   0  20 10635.8 642.792   1
  -2   0  20 10922.6 521.340   6
  -2   0  21 1134.92 210.175   1
  -2   0  22 2028.54 315.593   1
  -2   0  23 5463.63 512.569   1
  -2   0  24 1279.48 280.390   1
  -2   1 -24 4364.31 467.858   8
  -2   1 -23 4021.30 453.284   8
  -2   1 -23 3425.23 535.424   2
  -2   1 -22 4706.30 457.234   8
  -2   1 -22 4910.90 616.919   2
  -2   1 -21 8099.70 765.709   2
  -2   1 -21 10723.6 654.116   8
  -2   1 -20 525.336 245.217   2
  -2   1 -20 586.029 187.990   8
  -2   1 -19 26116.1 955.444   8
  -2   1 -19 25685.0 1263.78   2
  -2   1 -18 180.148 132.415   8
  -2   1 -18 511.272 255.089   2
  -2   1 -17 12652.3 836.346   2
  -2   1 -17 14004.3 642.056   8
  -2   1 -16 1622.49 226.495   8
  -2   1 -16 1822.34 310.510   2
  -2   1 -15 16861.4 908.407   2
  -2   1 -15 19242.3 701.923   8
  -2   1 -14 6791.40 548.184   2
  -2   1 -14 7524.30 413.291   8
  -2   1 -13 14384.2 401.386   5
  -2   1 -13 14378.2 767.424   2
  -2   1 -13 10991.4 274.859   4
  -2   1 -13 15791.8 571.948   8
  -2   1 -13 12282.5 285.765   4
  -2   1 -12 6938.09 260.161   5
  -2   1 -12 6242.84 490.854   2
  -2   1 -12 6072.08 207.346   4
  -2   1 -12 7008.54 365.965   8
  -2   1 -11 8659.88 275.042   5
  -2   1 -11 8202.70 537.758   2
  -2   1 -11 8489.97 271.782   4
  -2   1 -11 9582.94 409.454   8
  -2   1 -10 25210.9 483.113   5
  -2   1 -10 24004.1 902.266   2
  -2   1 -10 26163.3 667.684   8
  -2   1  -9 605.082 84.9969   5
  -2   1  -9 844.500 139.915   8
  -2   1  -9 869.345 211.012   2
  -2   1  -8 42813.4 624.783   5
  -2   1  -8 41213.2 1103.53   2
  -2   1  -8 43602.4 823.628   8
  -2   1  -7 153.122 54.9321   5
  -2   1  -7 141.383 74.9529   8
  -2   1  -7 49.8556 58.2067   1
  -2   1  -7 108.042 119.078   2
  -2   1  -6 19326.5 451.663   8
  -2   1  -6 17776.6 481.069   1
  -2   1  -6 19924.1 533.144   6
  -2   1  -6 19032.2 345.346   5
  -2   1  -6 19837.5 661.237   2
  -2   1  -5 2018.84 193.733   2
  -2   1  -5 1847.89 141.517   1
  -2   1  -5 2063.65 160.747   6
  -2   1  -5 2067.89 134.034   8
  -2   1  -4 94400.5 1462.00   2
  -2   1  -4 92968.4 1188.43   4
  -2   1  -4 93135.6 1329.20   6
  -2   1  -3 1698.79 149.400   2
  -2   1  -3 1812.16 137.999   6
  -2   1  -3 1771.38 110.850   4
  -2   1  -2 21000.1 423.955   4
  -2   1  -2 21579.9 466.653   6
  -2   1  -2 21270.5 497.267   2
  -2   1  -1 15940.4 376.360   6
  -2   1  -1 15151.9 389.416   2
  -2   1  -1 16240.1 362.965   4
  -2   1   0 35367.0 597.514   6
  -2   1   0 34560.4 626.301   2
  -2   1   0 35939.0 599.812   4
  -2   1   1 32839.4 573.163   4
  -2   1   1 31321.8 593.273   2
  -2   1   2 5942.48 227.875   4
  -2   1   2 5657.86 201.335   3
  -2   1   2 5567.71 239.531   2
  -2   1   3 27492.7 548.664   1
  -2   1   3 27714.0 538.008   4
  -2   1   3 27605.4 482.493   3
  -2   1   4 133.947 52.9113   3
  -2   1   4 69.7242 52.5156   1
  -2   1   4 85.2127 45.3394   4
  -2   1   5 59889.9 931.038   4
  -2   1   5 61961.3 1004.30   1
  -2   1   5 60766.0 868.022   3
  -2   1   6 3359.05 211.564   1
  -2   1   6 3632.39 191.907   4
  -2   1   6 3191.80 170.584   3
  -2   1   7 68616.1 1023.42   3
  -2   1   7 72068.5 1080.05   4
  -2   1   7 70684.0 1180.26   1
  -2   1   8 3092.56 185.540   4
  -2   1   8 3036.35 219.453   1
  -2   1   9 42832.2 804.242   4
  -2   1   9 43738.2 903.737   6
  -2   1   9 41672.9 921.209   1
  -2   1  10 34789.3 718.681   4
  -2   1  10 34603.6 800.934   6
  -2   1  10 34929.3 855.760   1
  -2   1  11 27152.8 709.300   6
  -2   1  11 26081.3 620.541   4
  -2   1  11 26555.8 760.130   1
  -2   1  12 51488.4 1054.72   6
  -2   1  12 50609.6 949.701   4
  -2   1  12 51804.5 1147.09   1
  -2   1  13 4754.17 339.907   1
  -2   1  13 5329.67 315.179   6
  -2   1  14 36049.0 1000.77   1
  -2   1  14 35960.8 895.038   6
  -2   1  15 234.642 102.129   1
  -2   1  15 270.419 95.4070   6
  -2   1  16 12652.6 613.009   1
  -2   1  16 13154.8 545.163   6
  -2   1  17 16.5139 76.4525   6
  -2   1  17 66.0408 109.550   1
  -2   1  18 12282.2 647.621   1
  -2   1  18 12245.8 559.846   6
  -2   1  19 6560.93 496.993   1
  -2   1  19 6636.53 419.689   6
  -2   1  20 3768.35 383.075   1
  -2   1  20 3659.69 315.252   6
  -2   1  21 11648.2 695.209   1
  -2   1  21 11031.1 577.025   6
  -2   1  22 475.258 182.575   1
  -2   1  23 5683.66 535.723   1
  -2   1  24 885.597 252.525   1
  -2   2 -23 6714.41 732.650   2
  -2   2 -23 8099.39 598.253   8
  -2   2 -22 2783.30 354.377   8
  -2   2 -22 2495.63 421.933   2
  -2   2 -21 9102.03 584.201   8
  -2   2 -21 7871.27 737.006   2
  -2   2 -20 301.950 140.043   8
  -2   2 -20 284.269 197.607   2
  -2   2 -19 15237.0 947.577   2
  -2   2 -19 16887.4 746.611   8
  -2   2 -18 1743.89 249.451   8
  -2   2 -18 1803.46 351.669   2
  -2   2 -17 7978.82 657.108   2
  -2   2 -17 9378.05 512.849   8
  -2   2 -16 12975.0 784.295   2
  -2   2 -16 13349.6 587.208   8
  -2   2 -15 14977.3 822.595   2
  -2   2 -15 16472.4 624.868   8
  -2   2 -14 25872.7 1038.91   2
  -2   2 -14 28494.1 800.721   8
  -2   2 -13 32568.7 715.123   5
  -2   2 -13 33103.5 850.595   8
  -2   2 -13 32423.3 1136.03   2
  -2   2 -13 31041.7 639.811   4
  -2   2 -12 10814.4 368.483   5
  -2   2 -12 10795.4 620.133   2
  -2   2 -12 10497.4 362.052   4
  -2   2 -12 11273.5 449.690   8
  -2   2 -11 3555.67 208.947   5
  -2   2 -11 3143.99 337.580   2
  -2   2 -11 3420.02 239.709   8
  -2   2 -11 3539.87 225.829   7
  -2   2 -10 53343.3 1002.19   8
  -2   2 -10 52785.2 1329.55   2
  -2   2 -10 56623.3 988.353   7
  -2   2 -10 54338.0 887.616   5
  -2   2  -9 3449.87 324.069   2
  -2   2  -9 3320.47 218.836   8
  -2   2  -9 3921.95 239.315   7
  -2   2  -9 3582.27 202.709   5
  -2   2  -8 46893.6 886.049   1
  -2   2  -8 47947.6 875.053   7
  -2   2  -8 47471.0 1130.15   2
  -2   2  -8 46321.8 827.784   8
  -2   2  -8 48104.6 780.713   5
  -2   2  -7 1241.42 120.257   1
  -2   2  -7 1454.89 145.656   6
  -2   2  -7 1192.70 106.175   8
  -2   2  -7 1231.34 126.930   7
  -2   2  -7 1342.99 116.428   5
  -2   2  -7 1212.24 172.505   2
  -2   2  -6 52862.5 804.875   8
  -2   2  -6 52863.3 909.993   7
  -2   2  -6 52438.7 864.297   1
  -2   2  -6 57200.2 1108.08   2
  -2   2  -6 54757.1 956.406   6
  -2   2  -6 50459.9 844.353   5
  -2   2  -5 2288.84 183.088   2
  -2   2  -5 2221.00 135.918   1
  -2   2  -5 2244.87 160.571   7
  -2   2  -5 2460.50 173.180   6
  -2   2  -5 2077.11 114.065   8
  -2   2  -5 2455.88 145.654   5
  -2   2  -4 38579.8 571.768   8
  -2   2  -4 40132.8 763.890   2
  -2   2  -4 39494.6 719.652   7
  -2   2  -4 38191.7 581.613   5
  -2   2  -4 39676.2 731.574   6
  -2   2  -3 6780.74 259.072   7
  -2   2  -3 6859.01 262.226   2
  -2   2  -3 7100.93 263.412   6
  -2   2  -2 3870.53 180.486   2
  -2   2  -2 3945.55 192.376   6
  -2   2  -2 3678.98 189.890   7
  -2   2  -1 30850.5 560.572   2
  -2   2  -1 30665.3 583.011   7
  -2   2   0 1021.73 107.483   7
  -2   2   0 1071.72 99.0582   2
  -2   2   0 1080.96 103.446   3
  -2   2   1 29613.0 510.814   1
  -2   2   1 32359.2 582.785   4
  -2   2   1 29810.6 558.436   7
  -2   2   1 30162.8 571.396   2
  -2   2   1 30243.5 562.522   3
  -2   2   2 11718.1 313.894   7
  -2   2   2 12592.7 315.192   1
  -2   2   2 12361.9 327.676   3
  -2   2   2 12693.1 339.036   4
  -2   2   3 82059.6 1128.65   7
  -2   2   3 89236.5 1192.99   4
  -2   2   3 88469.1 1178.59   1
  -2   2   3 86423.2 1164.22   3
  -2   2   4 387.366 91.8452   1
  -2   2   4 390.797 93.4491   3
  -2   2   4 617.639 106.268   4
  -2   2   4 463.373 89.0938   7
  -2   2   5 42627.0 732.851   4
  -2   2   5 42208.7 774.924   1
  -2   2   5 41253.7 747.875   3
  -2   2   6 3697.31 189.556   4
  -2   2   6 3859.65 222.048   1
  -2   2   6 3685.03 211.236   3
  -2   2   7 38236.4 766.627   3
  -2   2   7 39519.9 720.008   4
  -2   2   7 38693.2 808.713   1
  -2   2   8 17653.3 540.821   1
  -2   2   8 17814.9 453.875   4
  -2   2   9 50021.0 1059.43   6
  -2   2   9 50224.1 874.051   4
  -2   2   9 49633.0 1023.02   1
  -2   2  10 29816.5 795.690   6
  -2   2  10 29336.0 635.182   4
  -2   2  10 29102.7 775.441   1
  -2   2  11 7942.48 404.489   1
  -2   2  11 7534.47 306.581   4
  -2   2  11 7932.26 405.272   6
  -2   2  12 65843.0 1341.18   1
  -2   2  12 68261.5 1336.24   6
  -2   2  12 64557.6 1086.18   4
  -2   2  13 745.387 112.284   4
  -2   2  13 815.049 165.351   1
  -2   2  13 1036.88 178.329   6
  -2   2  14 61671.1 1307.20   6
  -2   2  14 61066.9 1358.30   1
  -2   2  14 57927.6 1051.79   4
  -2   2  15 14144.4 636.339   1
  -2   2  15 13949.2 594.251   6
  -2   2  16 5574.05 419.068   1
  -2   2  16 5739.84 387.225   6
  -2   2  17 2040.19 273.764   1
  -2   2  17 2584.44 267.585   6
  -2   2  18 13576.8 694.157   1
  -2   2  18 13375.5 623.123   6
  -2   2  19 10252.2 618.660   1
  -2   2  19 11228.3 586.143   6
  -2   2  20 769.489 194.837   1
  -2   2  20 1038.40 198.508   6
  -2   2  21 13677.0 765.376   1
  -2   2  21 11908.5 636.195   6
  -2   2  22 948.285 254.180   1
  -2   2  22 458.817 158.322   6
  -2   2  23 4762.53 496.353   1
  -2   3 -23 6353.18 691.342   2
  -2   3 -22-331.590 171.781   8
  -2   3 -22-164.876 212.828   2
  -2   3 -21 5123.31 439.787   8
  -2   3 -21 4844.00 543.408   2
  -2   3 -20 175.995 136.730   8
  -2   3 -20-192.060 217.340   2
  -2   3 -19 12292.4 618.799   8
  -2   3 -19 10884.5 770.965   2
  -2   3 -18 5474.09 544.914   2
  -2   3 -18 5838.60 408.874   8
  -2   3 -17 7276.06 591.747   2
  -2   3 -17 8403.23 473.935   8
  -2   3 -16 17255.2 653.198   8
  -2   3 -16 16815.5 864.680   2
  -2   3 -15 9745.49 646.367   2
  -2   3 -15 10424.8 490.365   8
  -2   3 -15 8992.69 358.979   4
  -2   3 -14 33823.3 1147.25   2
  -2   3 -14 34974.7 886.105   8
  -2   3 -14 30854.2 731.050   4
  -2   3 -13 402.575 137.552   8
  -2   3 -13 344.509 169.232   2
  -2   3 -13-30.8256 74.0523   4
  -2   3 -12 40182.1 1165.95   2
  -2   3 -12 40166.5 894.105   8
  -2   3 -12 39283.4 844.939   5
  -2   3 -11 4848.51 375.417   2
  -2   3 -11 4812.54 264.955   5
  -2   3 -11 4650.24 270.373   8
  -2   3 -10 45377.4 882.800   8
  -2   3 -10 45079.1 1150.91   2
  -2   3 -10 47742.1 901.574   5
  -2   3  -9 6446.12 278.991   8
  -2   3  -9 6678.06 405.702   2
  -2   3  -9 6604.89 301.837   1
  -2   3  -9 6674.13 308.985   5
  -2   3  -8 19128.8 634.484   2
  -2   3  -8 18157.8 508.272   7
  -2   3  -8 18695.3 490.067   1
  -2   3  -8 18952.1 461.033   8
  -2   3  -8 18670.0 517.543   5
  -2   3  -7 6714.42 300.734   7
  -2   3  -7 6600.04 261.819   1
  -2   3  -7 7007.44 355.363   2
  -2   3  -7 6697.79 307.953   6
  -2   3  -7 6330.46 238.258   8
  -2   3  -7 6534.53 306.470   5
  -2   3  -6 320.278 78.8832   7
  -2   3  -6 308.084 57.2860   1
  -2   3  -6 376.828 74.5342   6
  -2   3  -6 321.190 54.4483   8
  -2   3  -6 284.148 72.2104   2
  -2   3  -6 177.492 70.9311   5
  -2   3  -5 38455.4 618.084   1
  -2   3  -5 37686.0 737.096   7
  -2   3  -5 37852.3 558.242   8
  -2   3  -5 38330.3 737.007   6
  -2   3  -5 36695.9 744.367   5
  -2   3  -5 38412.3 742.328   2
  -2   3  -4 24566.1 548.735   6
  -2   3  -4 23986.3 421.103   1
  -2   3  -4 23776.3 358.932   8
  -2   3  -4 23731.7 552.761   7
  -2   3  -4 25125.1 525.335   2
  -2   3  -4 24852.9 542.332   5
  -2   3  -3 82671.4 1203.58   7
  -2   3  -3 81814.9 1104.52   2
  -2   3  -3 82868.2 1177.38   6
  -2   3  -3 79781.7 1130.15   5
  -2   3  -2 716.038 78.4489   2
  -2   3  -2 565.210 87.8718   3
  -2   3  -2 626.014 88.2089   7
  -2   3  -1 6495.11 219.820   2
  -2   3  -1 6123.59 245.708   7
  -2   3  -1 6192.97 254.784   3
  -2   3   0 244.343 77.6693   3
  -2   3   0 197.514 61.2920   2
  -2   3   0 165.562 41.5065   1
  -2   3   0 148.227 57.8888   7
  -2   3   1 14571.3 303.881   1
  -2   3   1 14392.6 393.433   3
  -2   3   1 14177.1 368.627   7
  -2   3   2 15391.7 378.533   7
  -2   3   2 15876.1 346.803   1
  -2   3   2 15501.4 413.495   3
  -2   3   3 15404.0 371.455   7
  -2   3   3 16658.7 420.961   4
  -2   3   3 16142.2 378.797   1
  -2   3   3 15973.9 429.495   3
  -2   3   4 11532.5 344.091   4
  -2   3   4 11029.8 331.464   1
  -2   3   4 10949.7 298.561   7
  -2   3   4 11232.3 366.929   3
  -2   3   5 40072.4 716.797   4
  -2   3   5 38656.8 732.953   1
  -2   3   5 37675.6 624.610   7
  -2   3   5 38133.8 781.673   3
  -2   3   6 37146.7 601.425   7
  -2   3   6 38360.5 704.189   4
  -2   3   6 36382.3 796.599   3
  -2   3   6 37308.4 757.232   1
  -2   3   7 38185.5 711.768   4
  -2   3   7 36352.9 813.084   3
  -2   3   7 36709.9 577.946   7
  -2   3   7 37024.7 792.021   1
  -2   3   8 51798.0 1013.21   1
  -2   3   8 52284.0 882.263   4
  -2   3   8 51107.0 1020.54   3
  -2   3   9 96.6334 63.0385   1
  -2   3   9 82.3012 48.6654   4
  -2   3   9 45.3419 91.9134   6
  -2   3  10 17474.2 591.776   1
  -2   3  10 18015.5 473.853   4
  -2   3  10 17558.9 639.651   6
  -2   3  11 1313.33 127.547   4
  -2   3  11 1571.84 186.308   1
  -2   3  11 1436.51 198.254   6
  -2   3  12 42628.2 1047.13   1
  -2   3  12 43517.2 1095.73   6
  -2   3  12 41635.8 804.661   4
  -2   3  13 4828.46 353.674   1
  -2   3  13 4723.97 243.749   4
  -2   3  13 4963.19 365.712   6
  -2   3  14 16077.6 661.330   1
  -2   3  14 16542.0 476.653   4
  -2   3  14 16820.8 679.107   6
  -2   3  15 8493.78 490.816   6
  -2   3  15 8503.57 500.257   1
  -2   3  16 29717.5 962.356   6
  -2   3  16 28396.3 965.730   1
  -2   3  17 7806.66 509.688   1
  -2   3  17 8422.77 512.621   6
  -2   3  18 3786.99 374.070   1
  -2   3  18 3660.69 343.982   6
  -2   3  19 15638.9 735.876   6
  -2   3  19 15959.7 790.117   1
  -2   3  20 97.1171 151.590   1
  -2   3  20 104.766 108.210   6
  -2   3  21 13474.5 716.484   6
  -2   3  21 13554.4 781.553   1
  -2   3  22 589.151 166.542   6
  -2   3  22 863.389 245.747   1
  -2   3  23 4490.09 492.428   1
  -2   3  23 5054.39 463.690   6
  -2   4 -23 5884.00 629.343   2
  -2   4 -22 218.531 210.169   2
  -2   4 -21 8902.13 708.233   2
  -2   4 -21 9797.53 592.107   8
  -2   4 -20 5328.95 542.942   2
  -2   4 -20 5971.77 447.330   8
  -2   4 -19 4222.77 467.897   2
  -2   4 -19 4265.79 363.761   8
  -2   4 -18 9622.27 676.813   2
  -2   4 -18 10687.6 554.625   8
  -2   4 -17 2949.82 287.419   8
  -2   4 -17 2378.17 321.422   2
  -2   4 -16 16676.9 822.916   2
  -2   4 -16 15444.1 540.173   4
  -2   4 -16 18373.7 668.694   8
  -2   4 -15 1936.25 199.931   4
  -2   4 -15 2642.72 258.255   8
  -2   4 -15 1974.00 303.993   2
  -2   4 -14 41519.2 1229.70   2
  -2   4 -14 39792.5 964.110   4
  -2   4 -14 41903.0 978.024   8
  -2   4 -13 1853.29 216.951   4
  -2   4 -13 2221.35 216.412   8
  -2   4 -13 2094.77 273.436   2
  -2   4 -12 50285.4 1258.10   2
  -2   4 -12 48713.0 991.454   8
  -2   4 -11 6323.81 406.862   2
  -2   4 -11 5988.29 298.404   8
  -2   4 -11 6087.32 338.496   5
  -2   4 -10 23408.0 578.102   8
  -2   4 -10 23316.6 672.614   5
  -2   4 -10 23668.7 745.566   2
  -2   4 -10 23053.1 599.749   1
  -2   4  -9 26710.2 591.972   8
  -2   4  -9 26963.9 731.252   5
  -2   4  -9 26593.9 750.227   2
  -2   4  -9 26578.6 614.791   1
  -2   4  -8 33594.3 791.122   2
  -2   4  -8 31384.0 611.691   8
  -2   4  -8 31166.5 634.320   1
  -2   4  -8 31138.0 801.561   5
  -2   4  -7 53253.6 1101.41   5
  -2   4  -7 53518.0 969.271   6
  -2   4  -7 53353.8 818.636   8
  -2   4  -7 55100.1 853.774   1
  -2   4  -7 56266.7 1003.06   2
  -2   4  -6 4383.69 245.588   7
  -2   4  -6 4431.02 221.758   2
  -2   4  -6 4396.56 176.338   1
  -2   4  -6 4329.38 234.400   6
  -2   4  -6 4474.60 172.154   8
  -2   4  -6 4696.14 289.629   5
  -2   4  -5 78835.7 1251.37   3
  -2   4  -5 78570.6 1111.48   2
  -2   4  -5 77631.3 955.924   8
  -2   4  -5 78262.3 1195.13   6
  -2   4  -5 80168.2 991.717   1
  -2   4  -5 79215.3 1250.99   7
  -2   4  -5 78763.9 1345.17   5
  -2   4  -4 1112.61 124.334   2
  -2   4  -4 755.083 137.179   7
  -2   4  -4 743.847 64.7760   8
  -2   4  -4 1259.21 171.279   3
  -2   4  -4 1231.55 152.363   6
  -2   4  -4 531.363 58.2866   1
  -2   4  -4 923.590 178.207   5
  -2   4  -3 109533. 1554.73   7
  -2   4  -3 110284. 1360.06   2
  -2   4  -3 112082. 1566.15   3
  -2   4  -3 111566. 1594.68   5
  -2   4  -3 112447. 1186.00   1
  -2   4  -2 2926.88 186.631   7
  -2   4  -2 2761.61 181.821   3
  -2   4  -2 2734.40 135.613   2
  -2   4  -1 33014.6 556.113   2
  -2   4  -1 32871.6 684.784   3
  -2   4  -1 32480.7 664.310   7
  -2   4   0 19034.3 477.758   7
  -2   4   0 19390.1 311.112   8
  -2   4   0 19665.0 303.607   1
  -2   4   0 19873.0 509.173   3
  -2   4   1 6852.75 183.692   1
  -2   4   1 6749.85 287.168   3
  -2   4   1 6798.56 267.059   7
  -2   4   1 6912.96 190.941   8
  -2   4   2 21646.5 410.115   1
  -2   4   2 21523.8 418.113   8
  -2   4   2 20610.0 482.428   7
  -2   4   2 21801.6 547.968   3
  -2   4   3 10306.6 318.415   7
  -2   4   3 10916.7 307.794   8
  -2   4   3 10788.3 385.013   3
  -2   4   3 11128.5 304.855   1
  -2   4   4 32725.1 619.262   1
  -2   4   4 31364.4 618.229   8
  -2   4   4 31004.2 590.629   7
  -2   4   4 32319.3 734.032   3
  -2   4   5 11617.3 367.255   1
  -2   4   5 12006.3 371.687   4
  -2   4   5 11383.4 318.058   7
  -2   4   5 11603.2 435.595   3
  -2   4   6 84676.9 1298.49   1
  -2   4   6 82581.4 1120.17   7
  -2   4   6 85721.4 1246.56   4
  -2   4   6 83160.1 1422.67   3
  -2   4   7 1817.91 168.295   1
  -2   4   7 1866.27 119.078   7
  -2   4   7 2033.18 153.258   4
  -2   4   7 1882.26 192.653   3
  -2   4   8 27382.9 602.209   4
  -2   4   8 25896.4 737.427   3
  -2   4   8 26682.3 693.039   1
  -2   4   8 26935.1 482.561   7
  -2   4   9 345.074 78.8959   4
  -2   4   9 255.641 48.7134   7
  -2   4   9 558.796 146.764   6
  -2   4   9 266.605 93.1455   1
  -2   4  10 39470.6 938.197   1
  -2   4  10 38329.5 1035.50   6
  -2   4  10 37189.8 743.490   4
  -2   4  11 955.418 177.780   6
  -2   4  11 849.320 105.853   4
  -2   4  11 866.201 148.869   1
  -2   4  12 34032.2 1008.21   6
  -2   4  12 32497.1 690.799   4
  -2   4  12 32872.2 918.198   1
  -2   4  13 16415.0 467.038   4
  -2   4  13 16309.1 657.913   1
  -2   4  13 16610.0 702.943   6
  -2   4  14 20743.9 534.924   4
  -2   4  14 21553.8 784.826   1
  -2   4  14 20933.1 809.041   6
  -2   4  15 23470.1 851.384   1
  -2   4  15 23576.0 882.160   6
  -2   4  16 12886.0 646.135   1
  -2   4  16 13472.3 674.385   6
  -2   4  17 16725.3 767.241   1
  -2   4  17 15931.5 754.576   6
  -2   4  18 398.528 180.489   1
  -2   4  18 768.452 198.658   6
  -2   4  19 20855.8 924.873   1
  -2   4  19 20082.7 888.242   6
  -2   4  20 849.631 211.255   1
  -2   4  20 866.089 228.406   6
  -2   4  21 16458.6 874.058   1
  -2   4  21 16809.8 852.338   6
  -2   4  22 1545.58 303.189   6
  -2   4  22 1156.26 291.604   1
  -2   4  23 3259.58 410.348   1
  -2   4  23 3373.83 406.809   6
  -2   4  24 5208.71 519.357   6
  -2   5 -21 4956.91 497.308   2
  -2   5 -20 10444.5 586.993   8
  -2   5 -20 10463.3 710.183   2
  -2   5 -19 7418.80 473.184   8
  -2   5 -19 6514.87 539.737   2
  -2   5 -18 6596.69 430.962   8
  -2   5 -18 5554.76 484.093   2
  -2   5 -17 3254.57 291.578   8
  -2   5 -17 2450.67 231.977   4
  -2   5 -17 2906.68 341.223   2
  -2   5 -16 18957.6 673.308   8
  -2   5 -16 17557.1 799.653   2
  -2   5 -16 16389.2 634.455   4
  -2   5 -15 463.658 120.074   4
  -2   5 -15 503.362 125.885   8
  -2   5 -15 471.154 150.540   2
  -2   5 -14 33870.3 983.463   4
  -2   5 -14 35061.1 1056.97   2
  -2   5 -14 36313.0 888.362   8
  -2   5 -13 5813.83 398.579   4
  -2   5 -13 6166.19 416.511   2
  -2   5 -13 6082.06 329.102   8
  -2   5 -12 32854.4 773.599   8
  -2   5 -12 32197.8 921.492   2
  -2   5 -11 24374.7 619.494   8
  -2   5 -11 25872.6 723.727   3
  -2   5 -11 23791.1 734.432   2
  -2   5 -10 25868.2 619.525   1
  -2   5 -10 26154.3 612.732   8
  -2   5 -10 27226.5 731.193   3
  -2   5 -10 26049.4 727.832   2
  -2   5  -9 29269.4 743.675   3
  -2   5  -9 28221.1 607.086   8
  -2   5  -9 28947.1 714.752   2
  -2   5  -9 28626.0 615.547   1
  -2   5  -8 18127.4 436.518   8
  -2   5  -8 18743.6 510.453   2
  -2   5  -8 18021.8 436.069   1
  -2   5  -8 18668.9 568.851   3
  -2   5  -8 18174.9 660.914   5
  -2   5  -7 58539.6 1253.05   5
  -2   5  -7 56759.0 860.704   8
  -2   5  -7 59414.6 861.342   1
  -2   5  -7 58500.8 944.062   2
  -2   5  -7 61258.6 1106.44   3
  -2   5  -7 57724.1 1020.15   6
  -2   5  -6 2284.43 159.833   2
  -2   5  -6 2672.12 228.759   3
  -2   5  -6 2599.09 207.550   6
  -2   5  -6 1981.92 125.902   1
  -2   5  -6 2153.80 271.617   5
  -2   5  -5 45068.2 599.754   1
  -2   5  -5 45008.9 902.509   3
  -2   5  -5 45505.6 842.683   6
  -2   5  -5 46129.7 1041.66   5
  -2   5  -5 46049.1 702.059   2
  -2   5  -4 13979.0 525.269   5
  -2   5  -4 14708.7 432.247   6
  -2   5  -4 14547.1 323.938   2
  -2   5  -4 14275.2 463.599   3
  -2   5  -3 63015.6 841.249   2
  -2   5  -3 62925.3 1092.34   3
  -2   5  -3 61840.2 1185.96   5
  -2   5  -2 14604.5 312.053   2
  -2   5  -2 13842.2 259.553   8
  -2   5  -2 14404.4 456.407   3
  -2   5  -2 13936.1 481.466   5
  -2   5  -2 13888.8 443.891   7
  -2   5  -1 19107.7 330.169   8
  -2   5  -1 19286.1 523.211   7
  -2   5  -1 20407.6 549.462   3
  -2   5   0 1614.36 91.8508   8
  -2   5   0 1683.09 146.819   7
  -2   5   0 1636.96 154.320   3
  -2   5   1 62409.6 1036.79   7
  -2   5   1 62951.9 808.903   1
  -2   5   1 62060.3 862.630   8
  -2   5   1 64358.7 1119.93   3
  -2   5   2 5016.18 184.699   1
  -2   5   2 4886.16 239.935   7
  -2   5   2 5193.79 206.229   8
  -2   5   2 5396.59 288.778   3
  -2   5   3 833.186 85.3859   1
  -2   5   3 762.716 115.735   3
  -2   5   3 835.294 98.0914   7
  -2   5   3 893.855 94.6859   8
  -2   5   4 46159.6 817.511   8
  -2   5   4 45088.7 797.257   7
  -2   5   4 44199.7 778.864   1
  -2   5   4 46047.6 978.295   3
  -2   5   5 139.086 52.8169   1
  -2   5   5 236.910 90.7688   3
  -2   5   5 113.446 52.1637   8
  -2   5   5 65.2131 42.8696   7
  -2   5   6 53467.7 859.772   7
  -2   5   6 53005.2 971.141   1
  -2   5   6 54573.1 1141.50   3
  -2   5   7 2575.37 235.746   3
  -2   5   7 3105.33 197.461   4
  -2   5   7 3161.19 223.834   1
  -2   5   7 3102.65 165.079   7
  -2   5   8 42706.4 1041.17   3
  -2   5   8 42098.1 701.606   7
  -2   5   8 43298.0 822.757   4
  -2   5   8 43353.7 934.651   1
  -2   5   9 4491.64 184.925   7
  -2   5   9 4712.67 303.509   1
  -2   5   9 4719.85 357.125   6
  -2   5   9 4468.49 236.391   4
  -2   5  10 14734.6 555.509   1
  -2   5  10 14899.3 649.335   6
  -2   5  10 13933.7 429.617   4
  -2   5  10 13142.7 315.665   7
  -2   5  11 3126.84 303.852   6
  -2   5  11 3250.27 277.794   1
  -2   5  11 2874.10 188.681   4
  -2   5  11 2562.56 117.156   7
  -2   5  12 18076.4 675.431   1
  -2   5  12 16666.0 478.528   4
  -2   5  12 18508.9 761.870   6
  -2   5  13 17310.2 488.720   4
  -2   5  13 18372.6 711.539   1
  -2   5  13 18067.8 773.894   6
  -2   5  14 5614.73 406.494   1
  -2   5  14 5593.13 433.878   6
  -2   5  15 22126.4 842.849   1
  -2   5  15 21956.3 894.483   6
  -2   5  16 2785.49 320.447   1
  -2   5  16 3075.65 347.363   6
  -2   5  17 27180.7 1007.42   1
  -2   5  17 26344.8 1032.85   6
  -2   5  18 259.386 183.016   6
  -2   5  18-89.0232 121.417   1
  -2   5  19 8623.47 607.298   6
  -2   5  19 8086.52 588.047   1
  -2   5  20 1501.45 297.948   1
  -2   5  20 2057.49 327.767   6
  -2   5  21 5806.82 531.701   6
  -2   5  21 5787.58 530.167   1
  -2   5  22 3074.77 414.521   6
  -2   5  22 3020.14 399.506   1
  -2   5  23 5172.52 532.066   6
  -2   5  24 5930.07 551.018   6
  -2   6 -19 811.720 176.099   8
  -2   6 -18 10719.6 539.781   8
  -2   6 -18 9918.13 603.072   2
  -2   6 -18 10638.3 529.782   3
  -2   6 -17 113.318 81.4288   3
  -2   6 -17 85.3419 109.760   2
  -2   6 -17 258.845 119.024   4
  -2   6 -17 213.211 98.2200   8
  -2   6 -16 10687.0 495.746   8
  -2   6 -16 10631.0 511.824   3
  -2   6 -16 8911.24 521.169   4
  -2   6 -16 9482.97 549.368   2
  -2   6 -15 2803.37 265.928   3
  -2   6 -15 2784.54 251.994   8
  -2   6 -15 2221.07 273.753   4
  -2   6 -15 2622.49 279.362   2
  -2   6 -14 8948.32 537.373   4
  -2   6 -14 10177.0 520.559   2
  -2   6 -14 10484.7 452.767   8
  -2   6 -14 10736.1 500.922   3
  -2   6 -13 8908.15 538.858   4
  -2   6 -13 10105.8 423.747   8
  -2   6 -13 10428.9 492.880   2
  -2   6 -13 10325.1 476.227   3
  -2   6 -12 14638.6 554.659   2
  -2   6 -12 14635.2 491.216   8
  -2   6 -12 15731.8 578.897   3
  -2   6 -11 28395.7 737.185   2
  -2   6 -11 27600.4 668.492   1
  -2   6 -11 28268.6 778.184   3
  -2   6 -11 28165.3 670.152   8
  -2   6 -10 8650.00 362.539   2
  -2   6 -10 8510.25 330.442   1
  -2   6 -10 8667.99 334.599   8
  -2   6 -10 9167.87 418.401   3
  -2   6  -9 56891.3 1116.17   3
  -2   6  -9 55138.0 949.304   2
  -2   6  -9 52835.7 907.953   8
  -2   6  -9 53438.1 890.229   1
  -2   6  -8 1123.93 115.289   1
  -2   6  -8 1109.06 125.111   2
  -2   6  -8 1352.02 173.312   3
  -2   6  -7 30534.3 519.427   1
  -2   6  -7 32061.2 574.225   2
  -2   6  -7 33026.2 787.836   3
  -2   6  -6 985.859 95.4136   2
  -2   6  -6 1136.59 152.984   6
  -2   6  -6 1500.69 186.335   3
  -2   6  -5 72332.3 924.774   2
  -2   6  -5 72216.5 1176.16   6
  -2   6  -5 73810.1 1270.34   3
  -2   6  -4 19796.3 349.947   2
  -2   6  -4 20607.7 591.355   3
  -2   6  -3 58543.8 1099.22   3
  -2   6  -2 47779.5 733.691   8
  -2   6  -2 51615.9 998.567   3
  -2   6  -1 14089.7 336.571   8
  -2   6  -1 15330.9 506.023   3
  -2   6   0 17706.3 398.551   8
  -2   6   0 18411.3 566.170   3
  -2   6   1 1445.24 164.701   3
  -2   6   1 1454.11 116.700   8
  -2   6   2 16922.9 428.853   8
  -2   6   2 17580.8 579.909   3
  -2   6   3 10485.5 376.862   7
  -2   6   3 10567.8 320.251   1
  -2   6   3 10450.0 347.156   8
  -2   6   3 10442.6 449.991   3
  -2   6   4 52636.6 901.283   1
  -2   6   4 52174.3 939.858   8
  -2   6   4 52023.7 945.489   7
  -2   6   4 55047.2 1156.43   3
  -2   6   5 8575.39 328.641   7
  -2   6   5 8670.96 336.132   1
  -2   6   5 8250.84 344.187   8
  -2   6   5 8829.30 438.831   3
  -2   6   6 24605.6 630.971   1
  -2   6   6 24361.0 569.586   7
  -2   6   6 25743.8 787.345   3
  -2   6   7 3131.46 276.429   3
  -2   6   7 3270.01 233.960   1
  -2   6   7 3158.68 186.337   7
  -2   6   8 7065.43 428.489   3
  -2   6   8 7321.79 275.700   7
  -2   6   8 6823.11 311.251   4
  -2   6   8 7365.05 365.426   1
  -2   6   9 17129.1 501.142   4
  -2   6   9 17681.0 606.366   1
  -2   6   9 17546.4 431.438   7
  -2   6   9 18876.0 744.250   6
  -2   6  10 13851.5 365.914   7
  -2   6  10 14802.0 576.622   1
  -2   6  10 15888.5 701.946   6
  -2   6  10 14267.2 452.470   4
  -2   6  11 12139.6 414.618   4
  -2   6  11 13082.5 562.790   1
  -2   6  11 13882.5 669.421   6
  -2   6  11 12161.3 317.252   7
  -2   6  12 3734.02 155.339   7
  -2   6  12 4557.92 249.476   4
  -2   6  12 5100.56 419.122   6
  -2   6  12 4683.38 353.591   1
  -2   6  13 17140.5 703.572   1
  -2   6  13 18552.4 810.797   6
  -2   6  14 720.814 160.856   1
  -2   6  14 588.104 156.545   6
  -2   6  15 15824.5 728.787   1
  -2   6  15 17399.4 824.078   6
  -2   6  16 210.559 130.800   1
  -2   6  16-83.1120 146.295   6
  -2   6  17 11975.2 718.780   6
  -2   6  17 11825.4 672.240   1
  -2   6  18 3335.67 388.362   6
  -2   6  18 3226.37 383.900   1
  -2   6  19 5472.48 517.307   6
  -2   6  19 5101.26 475.661   1
  -2   6  20 4241.40 477.233   6
  -2   6  20 4409.82 464.793   1
  -2   6  21 11681.4 788.517   6
  -2   6  22 8931.01 702.186   6
  -2   6  23 3167.14 448.951   6
  -2   7 -18 8249.67 535.006   4
  -2   7 -17 739.125 149.012   3
  -2   7 -17 900.500 159.077   8
  -2   7 -17 950.067 208.788   4
  -2   7 -16 5828.48 364.105   8
  -2   7 -16 4594.41 414.668   4
  -2   7 -16 5569.91 383.283   2
  -2   7 -16 5942.36 380.209   3
  -2   7 -15 5615.58 345.172   8
  -2   7 -15 5542.56 363.852   3
  -2   7 -15 5062.60 352.527   2
  -2   7 -15 4273.19 399.396   4
  -2   7 -14 3725.99 370.000   4
  -2   7 -14 4721.56 336.639   3
  -2   7 -14 4444.23 295.972   8
  -2   7 -14 4607.71 310.656   2
  -2   7 -13 10196.0 607.723   4
  -2   7 -13 10019.0 422.252   8
  -2   7 -13 9952.05 430.868   2
  -2   7 -13 10288.9 480.339   3
  -2   7 -12 2215.01 201.216   8
  -2   7 -12 2109.02 222.225   3
  -2   7 -12 1757.37 172.346   2
  -2   7 -11 27459.5 643.701   2
  -2   7 -11 26363.1 655.490   8
  -2   7 -11 28816.6 797.069   3
  -2   7 -10 7633.91 301.071   2
  -2   7 -10 8116.35 410.551   3
  -2   7  -9 75322.0 1079.35   2
  -2   7  -9 78401.8 1409.90   3
  -2   7  -8 1114.10 149.918   3
  -2   7  -8 1383.59 104.790   2
  -2   7  -7 35935.6 859.077   3
  -2   7  -7 33295.7 516.782   2
  -2   7  -6 1420.12 172.873   3
  -2   7  -6 1013.46 62.9617   2
  -2   7  -5 27670.4 743.021   3
  -2   7  -4 47468.1 1018.51   3
  -2   7  -3 7446.01 372.212   3
  -2   7  -2 45754.9 797.972   8
  -2   7  -2 50613.8 1049.76   3
  -2   7  -1 1453.87 125.212   8
  -2   7  -1 1553.01 177.970   3
  -2   7   0 61119.1 981.735   8
  -2   7   0 62821.0 1233.66   3
  -2   7   1 295.611 92.5483   3
  -2   7   1 284.336 75.0401   8
  -2   7   2 33169.3 882.146   3
  -2   7   2 32956.4 702.044   8
  -2   7   3 2684.19 191.426   8
  -2   7   3 2563.68 243.679   3
  -2   7   4 13332.5 565.495   3
  -2   7   5 20492.8 718.726   3
  -2   7   6 5353.92 375.619   3
  -2   7   6 5309.17 296.214   1
  -2   7   7 5165.60 371.116   3
  -2   7   7 5249.54 304.322   1
  -2   7   8 3425.80 258.646   1
  -2   7   8 3741.71 217.452   7
  -2   7   8 3744.59 331.542   6
  -2   7   9 17537.5 747.660   6
  -2   7   9 15851.2 457.618   7
  -2   7   9 16527.3 600.235   1
  -2   7  10 6249.06 266.280   7
  -2   7  10 6214.20 385.894   1
  -2   7  10 7099.23 482.632   6
  -2   7  11 12966.7 377.357   7
  -2   7  11 15604.1 738.193   6
  -2   7  11 14548.0 607.640   1
  -2   7  12 454.029 169.447   6
  -2   7  12 360.165 113.682   1
  -2   7  13 20309.3 793.599   1
  -2   7  13 21300.7 911.231   6
  -2   7  14 5786.18 480.923   6
  -2   7  14 5308.63 417.183   1
  -2   7  15 10758.9 613.561   1
  -2   7  15 11487.0 695.062   6
  -2   7  16 2487.02 309.450   1
  -2   7  16 3053.21 377.231   6
  -2   7  17 7197.35 587.670   6
  -2   7  18 6157.96 554.990   6
  -2   7  19 5026.79 518.266   6
  -2   7  20 4541.15 498.767   6
  -2   7  21 2754.47 398.576   6
  -2   7  22 2638.26 421.163   6
  -2   8 -18 2899.98 349.937   4
  -2   8 -17 1379.64 249.017   4
  -2   8 -16 3066.15 360.517   4
  -2   8 -16 4379.04 336.842   3
  -2   8 -15 5842.90 492.625   4
  -2   8 -15 6511.74 379.062   8
  -2   8 -15 7120.69 415.347   3
  -2   8 -14 1553.88 199.026   3
  -2   8 -14 1816.03 197.489   8
  -2   8 -14 1603.63 256.374   4
  -2   8 -13 14565.3 760.564   4
  -2   8 -13 15292.5 601.055   3
  -2   8 -13 14086.3 521.572   8
  -2   8 -12 842.645 157.732   3
  -2   8 -12 700.919 127.266   8
  -2   8 -12 710.129 106.332   2
  -2   8 -11 47616.8 805.108   2
  -2   8 -11 53410.1 1159.28   3
  -2   8 -10 4514.81 185.003   2
  -2   8 -10 5690.09 354.029   3
  -2   8  -9 9972.50 234.351   2
  -2   8  -9 13852.3 535.611   3
  -2   8  -8 14946.4 565.313   3
  -2   8  -7 2797.41 250.007   3
  -2   8  -6 28219.1 790.622   3
  -2   8  -5 19601.4 653.896   3
  -2   8  -4 26239.1 768.211   3
  -2   8  -3 3539.52 284.913   3
  -2   8  -2 39041.4 787.335   8
  -2   8  -2 41536.8 1004.35   3
  -2   8  -1 225.347 127.661   3
  -2   8  -1 2.98343 58.1789   8
  -2   8   0 47379.4 913.733   8
  -2   8   0 50184.5 1145.54   3
  -2   8   1 6121.73 295.533   8
  -2   8   1 6503.55 391.886   3
  -2   8   2 28741.3 710.314   8
  -2   8   2 29046.7 872.696   3
  -2   8   3 17153.2 668.799   3
  -2   8   4 16174.7 662.403   3
  -2   8   5 18159.2 711.091   3
  -2   8   6 4141.48 350.433   3
  -2   8   7 34347.2 1039.97   3
  -2   8   8 8359.28 518.851   6
  -2   8   9 17317.4 772.801   6
  -2   8  10 11910.0 657.852   6
  -2   8  11 28394.0 1049.28   6
  -2   8  12 432.727 172.930   6
  -2   8  13 7729.73 568.478   6
  -2   8  14 3000.22 380.852   6
  -2   8  15 4465.18 459.737   6
  -2   8  16 5793.86 524.448   6
  -2   8  17 2559.95 369.749   6
  -2   8  18 6008.19 564.832   6
  -2   8  19 1129.03 268.332   6
  -2   8  20 9044.74 729.283   6
  -2   8  21 301.770 208.433   6
  -2   9 -18 2869.29 370.880   4
  -2   9 -17 6214.53 539.078   4
  -2   9 -16-176.124 163.925   4
  -2   9 -15 5800.94 516.439   4
  -2   9 -15 6085.23 393.079   3
  -2   9 -14 178.726 97.5950   3
  -2   9 -14 116.078 142.032   4
  -2   9 -13 7419.40 563.294   4
  -2   9 -13 6909.30 411.204   3
  -2   9 -13 6669.85 364.507   8
  -2   9 -12 783.325 150.328   3
  -2   9 -12 737.064 198.068   4
  -2   9 -11 12764.5 556.982   3
  -2   9 -10 9766.45 481.338   3
  -2   9  -9 21616.1 725.009   3
  -2   9  -8 30455.1 871.233   3
  -2   9  -7 12028.4 535.701   3
  -2   9  -6 34357.3 934.392   3
  -2   9  -5 23755.3 774.711   3
  -2   9  -4 24733.1 788.417   3
  -2   9  -3 827.945 169.928   3
  -2   9  -3 522.163 90.2833   8
  -2   9  -2 49880.4 979.605   8
  -2   9  -2 53044.4 1227.44   3
  -2   9  -1 6479.11 317.430   8
  -2   9  -1 7756.14 444.007   3
  -2   9   0 41810.0 921.418   8
  -2   9   0 47054.0 1162.97   3
  -2   9   1 18332.3 710.865   3
  -2   9   2 16225.0 677.605   3
  -2   9   3 34579.8 1025.35   3
  -2   9   4 1870.17 241.121   3
  -2   9   5 19724.2 779.563   3
  -2   9   6 61.6699 96.8802   3
  -2   9   7 37307.5 1158.34   6
  -2   9   8 6767.04 490.627   6
  -2   9   9 23144.5 934.481   6
  -2   9  10 1771.31 263.036   6
  -2   9  11 18123.2 853.121   6
  -2   9  12 5463.49 487.961   6
  -2   9  13 2475.55 337.608   6
  -2   9  14 7535.41 590.939   6
  -2   9  15 595.575 215.642   6
  -2   9  16 15703.6 893.556   6
  -2   9  17 1371.96 317.533   6
  -2   9  18 4091.42 485.289   6
  -2   9  19 192.728 162.134   6
  -2   9  20 10769.1 818.027   6
  -2  10 -18-261.868 212.349   4
  -2  10 -17 5133.86 515.185   4
  -2  10 -16 535.809 204.983   4
  -2  10 -15 10200.1 696.696   4
  -2  10 -14 2937.90 367.937   4
  -2  10 -14 3353.85 299.084   3
  -2  10 -13 6188.80 409.960   3
  -2  10 -13 6356.73 538.126   4
  -2  10 -12 2525.60 341.215   4
  -2  10 -12 2907.07 280.215   3
  -2  10 -11 7558.11 447.229   3
  -2  10 -10 4609.13 347.096   3
  -2  10  -9 3749.10 318.635   3
  -2  10  -8 17376.1 683.122   3
  -2  10  -7 3505.45 314.855   3
  -2  10  -6 31180.0 940.459   3
  -2  10  -5 1311.27 213.086   3
  -2  10  -4 44753.9 1166.42   3
  -2  10  -3 112.138 124.645   3
  -2  10  -2 14053.9 632.895   3
  -2  10  -1 24660.7 863.103   3
  -2  10   0 14241.0 654.591   3
  -2  10   1 38945.8 1126.76   3
  -2  10   2 847.221 174.566   3
  -2  10   3 10848.6 585.955   3
  -2  10   4 6963.15 478.576   3
  -2  10   5 26002.3 940.881   3
  -2  10   6 21.9360 101.921   3
  -2  10   6-126.808 142.810   6
  -2  10   7 25649.5 978.757   6
  -2  10   8 7778.30 540.919   6
  -2  10   9 7763.89 546.862   6
  -2  10  10 10648.0 658.907   6
  -2  10  11 4763.87 460.487   6
  -2  10  12 12803.5 758.185   6
  -2  10  13 581.332 207.720   6
  -2  10  14 16317.0 891.899   6
  -2  10  15-54.5874 152.016   6
  -2  10  16 12086.5 815.316   6
  -2  10  17 372.810 209.476   6
  -2  10  18 4908.41 537.488   6
  -2  11 -19 1531.78 330.340   4
  -2  11 -18 2322.74 368.221   4
  -2  11 -17 11358.6 791.893   4
  -2  11 -16 645.304 211.597   4
  -2  11 -15 5425.32 529.731   4
  -2  11 -14 2524.91 353.629   4
  -2  11 -13 2992.63 392.125   4
  -2  11 -13 3097.72 307.260   3
  -2  11 -12 6385.87 546.073   4
  -2  11 -12 6623.75 441.707   3
  -2  11 -11 641.407 164.947   3
  -2  11 -11 937.267 219.075   4
  -2  11 -10 6593.40 442.766   3
  -2  11  -9 231.554 102.197   3
  -2  11  -8 14703.3 664.980   3
  -2  11  -7 806.114 198.549   3
  -2  11  -6 30030.0 981.173   3
  -2  11  -5 3775.11 349.081   3
  -2  11  -4 10757.0 579.970   3
  -2  11  -3 1640.21 229.318   3
  -2  11  -2 14210.0 680.143   3
  -2  11  -1 23381.4 887.549   3
  -2  11   0 11303.2 613.511   3
  -2  11   1 26859.1 966.078   3
  -2  11   2 4242.51 381.395   3
  -2  11   3 21461.9 870.059   3
  -2  11   4 2333.63 288.369   3
  -2  11   5 29301.8 1049.35   3
  -2  11   5 27460.2 1018.76   6
  -2  11   6 3166.30 353.039   6
  -2  11   7 13166.7 720.750   6
  -2  11   8 17944.9 855.156   6
  -2  11   9 2245.68 331.235   6
  -2  11  10 13099.5 754.462   6
  -2  11  11 380.974 182.899   6
  -2  11  12 12006.6 752.701   6
  -2  11  13-122.471 167.009   6
  -2  11  14 12456.1 803.320   6
  -2  11  15 483.184 212.319   6
  -2  11  16 5509.03 557.117   6
  -2  11  17 1402.35 287.578   6
  -2  12 -18 1005.66 283.953   4
  -2  12 -17 885.591 279.638   4
  -2  12 -16 4835.83 519.187   4
  -2  12 -15 2936.76 412.051   4
  -2  12 -14 5196.28 528.790   4
  -2  12 -13-119.129 158.500   4
  -2  12 -12 2172.87 270.650   3
  -2  12 -12 2382.42 366.044   4
  -2  12 -11 911.033 188.515   3
  -2  12 -11 1374.74 292.866   4
  -2  12 -10 7624.44 598.007   4
  -2  12 -10 7888.12 510.669   3
  -2  12  -9 947.054 191.910   3
  -2  12  -8 6734.03 476.687   3
  -2  12  -7 3237.94 334.033   3
  -2  12  -6 10475.4 602.663   3
  -2  12  -5 7000.61 497.420   3
  -2  12  -4 6966.30 493.535   3
  -2  12  -3 7240.61 506.925   3
  -2  12  -2 2350.23 299.074   3
  -2  12  -1 13089.0 688.293   3
  -2  12   0 2566.55 324.341   3
  -2  12   1 13456.3 709.473   3
  -2  12   2 207.613 106.964   3
  -2  12   3 15275.3 757.749   6
  -2  12   3 16155.2 790.462   3
  -2  12   4 4637.75 428.157   3
  -2  12   4 4037.24 392.266   6
  -2  12   5 14641.9 762.266   6
  -2  12   6 8091.96 575.078   6
  -2  12   7 3288.83 383.333   6
  -2  12   8 12157.1 724.229   6
  -2  12   9 1223.17 263.533   6
  -2  12  10 6328.84 551.780   6
  -2  12  11 779.924 231.552   6
  -2  12  12 10738.7 732.425   6
  -2  12  13 978.926 240.224   6
  -2  12  14 5686.47 560.397   6
  -2  12  15 665.742 238.164   6
  -2  13 -16 7893.02 668.809   4
  -2  13 -15 292.588 169.277   4
  -2  13 -14 4636.02 522.599   4
  -2  13 -13 311.303 196.180   4
  -2  13 -12 5887.88 565.364   4
  -2  13 -11 2772.71 324.471   3
  -2  13 -11 2809.48 384.372   4
  -2  13 -10 8365.08 652.789   4
  -2  13 -10 9528.34 594.764   3
  -2  13  -9 2991.04 343.635   3
  -2  13  -9 2716.45 374.497   4
  -2  13  -8 891.999 215.734   3
  -2  13  -7 10514.1 636.193   3
  -2  13  -6 1310.53 242.191   3
  -2  13  -5 9017.84 584.797   3
  -2  13  -4 964.514 218.246   3
  -2  13  -3 8932.55 586.483   3
  -2  13  -2 440.999 154.207   3
  -2  13  -1 17163.0 828.742   3
  -2  13   0 59.1387 112.906   3
  -2  13   1 10169.5 643.598   3
  -2  13   1 9935.65 614.734   6
  -2  13   2 4034.33 411.930   3
  -2  13   2 4052.62 402.928   6
  -2  13   3 13349.3 746.751   3
  -2  13   3 12539.8 712.616   6
  -2  13   4 8383.11 588.760   6
  -2  13   5 3681.74 398.362   6
  -2  13   6 16041.3 843.982   6
  -2  13   7-10.4110 154.136   6
  -2  13   8 9636.56 675.929   6
  -2  13   9 279.217 196.105   6
  -2  13  10 20152.1 1005.48   6
  -2  13  11 3837.36 456.455   6
  -2  13  12 6410.86 592.018   6
  -2  13  13 4306.76 498.232   6
  -2  13  14 3109.03 444.487   6
  -2  14 -13 1399.54 295.302   4
  -2  14 -12 4962.01 534.323   4
  -2  14 -11 2409.56 360.545   4
  -2  14 -10 4877.22 512.846   4
  -2  14 -10 4153.73 428.296   3
  -2  14  -9 3456.51 440.257   4
  -2  14  -9 4207.89 418.156   3
  -2  14  -8 1285.69 237.148   3
  -2  14  -8 1651.28 310.434   4
  -2  14  -7 9233.71 699.409   4
  -2  14  -7 9329.70 622.264   3
  -2  14  -6-51.8937 153.902   3
  -2  14  -5 4469.16 442.035   3
  -2  14  -4 139.767 168.595   3
  -2  14  -3 14938.9 797.493   3
  -2  14  -2 164.071 141.584   3
  -2  14  -2 100.724 121.562   6
  -2  14  -1 7007.87 556.868   3
  -2  14  -1 6199.74 488.135   6
  -2  14   0 1594.63 291.427   3
  -2  14   0 1333.13 261.675   6
  -2  14   1 10390.7 682.228   3
  -2  14   1 9577.08 625.494   6
  -2  14   2 8092.28 583.941   6
  -2  14   3 1290.50 267.505   6
  -2  14   4 7294.72 560.514   6
  -2  14   5 805.482 236.202   6
  -2  14   6 14885.7 832.690   6
  -2  14   7 276.940 147.226   6
  -2  14   8 13588.4 822.529   6
  -2  14   9 16.9574 161.308   6
  -2  14  10 7315.54 617.461   6
  -2  14  11 2090.96 341.845   6
  -2  14  12 973.134 290.243   6
  -2  15 -10 366.692 169.264   4
  -2  15  -9 6055.26 576.647   4
  -2  15  -8 281.419 179.634   3
  -2  15  -8 67.2651 138.966   4
  -2  15  -7 3573.63 407.590   3
  -2  15  -7 4061.63 476.163   4
  -2  15  -6 110.023 167.624   4
  -2  15  -6 25.4333 155.937   3
  -2  15  -5 8696.15 692.286   4
  -2  15  -5 9457.22 661.604   3
  -2  15  -4 2743.90 374.267   3
  -2  15  -4 2867.80 400.528   4
  -2  15  -3 5376.40 516.296   3
  -2  15  -2 5520.36 517.914   3
  -2  15  -2 5135.26 442.764   6
  -2  15  -1 3674.39 436.595   3
  -2  15  -1 3354.34 386.979   6
  -2  15   0 8089.63 582.132   6
  -2  15   1 723.097 209.004   6
  -2  15   2 6241.14 526.243   6
  -2  15   3 1063.50 244.288   6
  -2  15   4 2744.75 364.794   6
  -2  15   5-68.9564 189.161   6
  -2  15   6 8668.11 668.565   6
  -2  15   7 60.0813 171.555   6
  -2  15   8 5195.46 526.084   6
  -2  15   9 2026.30 345.541   6
  -2  15  10 5173.10 547.526   6
  -2  16  -7 4615.83 497.458   3
  -2  16  -6 3560.58 438.229   3
  -2  16  -5 1148.75 277.824   3
  -2  16  -5 517.209 225.923   4
  -2  16  -4 2128.83 364.086   4
  -2  16  -3 2053.85 356.634   4
  -2  16  -2 3697.98 455.114   4
  -2  16  -1 6674.27 615.486   4
  -2  16   0 3337.26 440.664   4
  -2  16   0 4006.92 431.084   6
  -2  16   1 71.5581 167.842   4
  -2  16   1 313.206 182.090   6
  -2  16   2 3907.49 459.645   4
  -2  16   2 3542.74 410.831   6
  -2  16   3 313.564 190.485   4
  -2  16   3 818.940 238.949   6
  -2  16   4 7953.74 646.312   4
  -2  16   4 7958.03 625.918   6
  -2  16   5 474.539 196.583   4
  -2  16   5 69.3213 157.542   6
  -2  16   6 2893.41 411.475   4
  -2  16   6 3048.71 410.264   6
  -2  16   7 1631.63 308.885   4
  -2  16   7 2069.80 374.053   6
  -2  17   2 3860.78 490.734   4
  -2  17   3 1720.59 351.541   4
  -2  17   3 1812.82 348.705   6
  -2  17   4 4541.37 524.178   4
  -2  17   4 3577.71 419.728   6
  -2  17   5-98.3478 198.622   6
  -2  17   5 74.0433 161.545   4
  -1 -15  -8 3749.61 484.714   5
  -1 -15  -7 1877.77 365.522   5
  -1 -15  -6 2254.82 379.027   5
  -1 -15  -5 4004.32 449.015   5
  -1 -15  -4 1403.92 299.372   5
  -1 -15  -3 4599.71 475.916   5
  -1 -15  -2 38.4413 166.623   5
  -1 -15  -1 4079.14 464.630   5
  -1 -15   0 197.494 212.448   5
  -1 -15   1 2627.28 387.795   5
  -1 -15   2-222.508 210.911   5
  -1 -15   3 8927.87 668.514   5
  -1 -15   4 1770.09 323.151   5
  -1 -15   5 9001.16 696.017   5
  -1 -15   6 736.416 249.603   5
  -1 -15   7 3016.76 444.880   5
  -1 -14 -10 3310.91 402.940   5
  -1 -14  -9 763.214 266.222   5
  -1 -14  -8 3498.42 441.495   5
  -1 -14  -7 5340.10 512.740   5
  -1 -14  -6 2976.57 424.533   5
  -1 -14  -5 11539.3 740.453   5
  -1 -14  -4 115.251 238.171   5
  -1 -14  -3 7150.48 585.740   5
  -1 -14  -2 510.015 214.817   5
  -1 -14  -1 5773.41 519.265   5
  -1 -14   0 1634.36 306.747   5
  -1 -14   1 7040.78 573.304   5
  -1 -14   2 2340.33 370.391   5
  -1 -14   3 4069.33 452.153   5
  -1 -14   4 3000.60 409.646   5
  -1 -14   5 2875.50 406.527   5
  -1 -14   6 4480.73 500.706   5
  -1 -14   7 976.627 254.633   5
  -1 -14   8 5640.03 566.027   5
  -1 -14   9 8.89646 207.005   5
  -1 -14  10 4353.05 530.560   5
  -1 -14  11 142.382 231.882   5
  -1 -13 -13 22.6891 249.117   2
  -1 -13 -12 10257.9 725.127   2
  -1 -13 -11 4616.67 498.112   5
  -1 -13 -11 4025.53 436.506   2
  -1 -13 -10 5130.99 478.964   2
  -1 -13 -10 6215.12 575.629   5
  -1 -13  -9 2203.49 365.667   5
  -1 -13  -9 1951.90 299.289   2
  -1 -13  -8 530.296 240.394   5
  -1 -13  -7 7683.75 589.745   5
  -1 -13  -6-285.957 203.361   5
  -1 -13  -5 10813.6 680.919   5
  -1 -13  -4 151.569 187.255   5
  -1 -13  -3 6918.62 546.913   5
  -1 -13  -2 337.296 212.429   5
  -1 -13  -1 6396.12 515.116   5
  -1 -13   0 1847.45 324.294   5
  -1 -13   1 2843.64 372.441   5
  -1 -13   2 5245.79 492.842   5
  -1 -13   3 1809.17 327.776   5
  -1 -13   4 8446.61 637.751   5
  -1 -13   5 199.016 194.479   5
  -1 -13   6 6217.33 572.088   5
  -1 -13   7 1030.53 261.679   5
  -1 -13   8 4768.79 518.769   5
  -1 -13   9-366.575 299.608   5
  -1 -13  10 5469.55 570.586   5
  -1 -13  11 220.334 202.748   5
  -1 -13  12 2809.91 444.551   5
  -1 -13  13 3661.77 501.946   5
  -1 -13  14 3789.50 512.920   5
  -1 -12 -15 493.735 225.044   2
  -1 -12 -14 6863.86 632.345   2
  -1 -12 -13 2861.48 417.039   2
  -1 -12 -12 3422.94 418.688   5
  -1 -12 -12 2399.93 373.464   2
  -1 -12 -11 7303.37 587.808   2
  -1 -12 -11 7674.82 598.414   5
  -1 -12 -10 1590.73 313.688   5
  -1 -12 -10 1470.22 257.801   2
  -1 -12  -9 5272.86 462.020   2
  -1 -12  -9 6067.73 517.562   5
  -1 -12  -8 309.969 182.062   5
  -1 -12  -8 236.700 114.514   2
  -1 -12  -7 9996.34 572.526   2
  -1 -12  -7 11813.1 702.931   5
  -1 -12  -6 283.644 199.820   5
  -1 -12  -6 141.337 94.9468   2
  -1 -12  -5 8849.91 485.904   2
  -1 -12  -5 10200.1 640.135   5
  -1 -12  -4 3701.40 387.625   5
  -1 -12  -4 2931.93 266.664   2
  -1 -12  -3 11272.4 667.068   5
  -1 -12  -3 9754.02 461.522   2
  -1 -12  -2 6506.47 506.034   5
  -1 -12  -1 5930.44 494.805   5
  -1 -12   0 10297.3 642.272   5
  -1 -12   1 259.249 165.855   5
  -1 -12   2 9096.64 604.524   5
  -1 -12   3 439.796 209.132   5
  -1 -12   4 14747.6 796.371   5
  -1 -12   5 965.282 263.215   5
  -1 -12   6 6100.01 550.669   5
  -1 -12   6 6306.61 437.569   1
  -1 -12   7 1609.15 292.249   5
  -1 -12   7 1355.63 202.906   1
  -1 -12   8 4285.33 466.967   5
  -1 -12   9 588.772 200.530   5
  -1 -12  10 6207.10 582.394   5
  -1 -12  11 3834.62 471.776   5
  -1 -12  12 419.834 224.919   5
  -1 -12  13 5837.84 610.644   5
  -1 -12  14 1157.91 257.693   5
  -1 -12  15 2543.06 408.028   5
  -1 -12  16-516.814 237.890   5
  -1 -11 -16 1411.06 376.284   2
  -1 -11 -15 248.656 235.150   2
  -1 -11 -14 7597.02 678.165   2
  -1 -11 -13 10038.8 695.170   5
  -1 -11 -13 10304.1 746.481   2
  -1 -11 -12 5014.47 502.756   5
  -1 -11 -12 4315.37 474.580   2
  -1 -11 -11 13602.0 799.368   2
  -1 -11 -11 14799.2 816.851   5
  -1 -11 -10 1871.35 319.847   5
  -1 -11 -10 1662.57 275.179   2
  -1 -11  -9 19145.3 874.229   2
  -1 -11  -9 20138.7 924.769   5
  -1 -11  -8 156.044 184.852   5
  -1 -11  -8-67.4046 118.103   2
  -1 -11  -7 8941.32 541.300   2
  -1 -11  -7 10823.7 650.302   5
  -1 -11  -6 2481.28 321.595   5
  -1 -11  -6 2231.11 273.028   2
  -1 -11  -5 9874.02 514.313   2
  -1 -11  -5 10832.5 638.234   5
  -1 -11  -4 9465.07 467.618   2
  -1 -11  -4 9208.37 585.165   5
  -1 -11  -3 6958.51 383.583   2
  -1 -11  -3 7129.23 505.188   5
  -1 -11  -2 23569.3 928.763   5
  -1 -11  -2 22455.3 669.317   2
  -1 -11  -1 1484.40 256.818   5
  -1 -11  -1 1419.07 161.913   2
  -1 -11   0 16411.2 768.899   5
  -1 -11   0 15302.1 495.670   2
  -1 -11   1 1049.45 125.798   2
  -1 -11   1 1398.67 263.361   5
  -1 -11   2 10864.0 644.419   5
  -1 -11   3 444.762 198.638   5
  -1 -11   4 14643.1 771.347   5
  -1 -11   5 3490.32 407.651   5
  -1 -11   6 8566.87 611.305   5
  -1 -11   6 7468.15 460.429   1
  -1 -11   7 5178.79 488.486   5
  -1 -11   7 4840.23 361.579   1
  -1 -11   8 3746.85 423.378   5
  -1 -11   8 4484.18 346.184   1
  -1 -11   9 6849.67 577.014   5
  -1 -11   9 7863.27 458.378   1
  -1 -11  10 1726.71 293.380   5
  -1 -11  10 2107.97 241.385   1
  -1 -11  11 5416.13 505.199   5
  -1 -11  11 5292.24 378.244   1
  -1 -11  12 320.162 171.448   5
  -1 -11  13 3584.84 426.472   5
  -1 -11  14-75.3038 240.160   5
  -1 -11  15 7189.18 615.818   5
  -1 -11  16 709.887 249.550   5
  -1 -11  17 5803.99 582.682   5
  -1 -11  18 1263.27 338.697   5
  -1 -10 -17 1611.15 378.905   2
  -1 -10 -16 3327.13 474.730   2
  -1 -10 -15 6840.04 646.767   2
  -1 -10 -14 1497.60 257.072   5
  -1 -10 -14 1591.25 369.665   2
  -1 -10 -13 8537.69 683.660   2
  -1 -10 -13 9245.39 643.086   5
  -1 -10 -12 1684.53 309.151   5
  -1 -10 -12 1148.83 259.405   2
  -1 -10 -11 17068.8 891.047   2
  -1 -10 -11 17334.1 855.150   5
  -1 -10 -10-142.614 208.291   5
  -1 -10 -10-217.042 150.683   2
  -1 -10  -9 16316.0 801.114   5
  -1 -10  -9 14993.1 772.056   2
  -1 -10  -8 3254.57 369.260   5
  -1 -10  -8 2721.23 323.501   2
  -1 -10  -7 12798.8 644.160   2
  -1 -10  -7 12233.5 674.767   5
  -1 -10  -6 10232.2 546.817   2
  -1 -10  -6 10852.9 624.015   5
  -1 -10  -5 6943.80 489.565   5
  -1 -10  -5 6315.35 404.599   2
  -1 -10  -4 22594.7 886.902   5
  -1 -10  -4 21817.3 724.482   2
  -1 -10  -3 1284.67 239.888   5
  -1 -10  -3 1046.08 151.273   2
  -1 -10  -2 33102.8 825.332   2
  -1 -10  -2 33466.7 1079.38   5
  -1 -10  -1 558.807 162.819   5
  -1 -10  -1 821.811 134.512   2
  -1 -10   0 10503.3 398.034   2
  -1 -10   0 12309.4 638.152   5
  -1 -10   1 846.277 127.480   2
  -1 -10   1 1264.71 237.849   5
  -1 -10   2 24774.0 946.246   5
  -1 -10   2 23952.8 576.482   2
  -1 -10   3 5660.89 472.796   5
  -1 -10   3 4744.15 223.343   2
  -1 -10   4 21732.1 905.692   5
  -1 -10   5 5645.94 463.592   5
  -1 -10   6 607.892 170.986   5
  -1 -10   6 30.5569 113.870   1
  -1 -10   7 17751.3 845.136   5
  -1 -10   7 20730.7 717.556   1
  -1 -10   8 102.533 154.990   5
  -1 -10   8-291.383 110.957   1
  -1 -10   9 22052.2 966.797   5
  -1 -10   9 22739.4 767.405   1
  -1 -10  10-28.8593 175.664   5
  -1 -10  10-35.6658 87.1605   1
  -1 -10  11 11295.1 698.146   5
  -1 -10  11 10997.9 532.147   1
  -1 -10  12 281.438 158.003   5
  -1 -10  12 283.446 105.477   1
  -1 -10  13 6563.26 552.299   5
  -1 -10  13 5334.66 375.466   1
  -1 -10  14 1343.24 290.278   5
  -1 -10  14 1276.48 204.761   1
  -1 -10  15 5109.42 506.519   5
  -1 -10  16 2441.88 377.011   5
  -1 -10  17 3111.85 416.307   5
  -1 -10  18 1674.89 359.251   5
  -1  -9 -18 6278.28 673.337   2
  -1  -9 -17 6070.11 655.813   2
  -1  -9 -16 2204.68 387.812   2
  -1  -9 -15 9501.54 760.382   2
  -1  -9 -14 233.869 182.581   2
  -1  -9 -14-188.275 238.784   5
  -1  -9 -13 8359.25 669.491   2
  -1  -9 -13 8555.04 586.380   5
  -1  -9 -12 376.565 154.286   2
  -1  -9 -12 89.1227 168.950   5
  -1  -9 -11 10247.8 680.468   2
  -1  -9 -11 9792.86 617.878   5
  -1  -9 -10 3368.73 368.313   5
  -1  -9 -10 4194.63 419.649   2
  -1  -9  -9 15501.1 762.684   2
  -1  -9  -9 14931.4 738.293   5
  -1  -9  -8 5718.50 445.439   2
  -1  -9  -8 5128.80 417.748   5
  -1  -9  -7 16806.0 738.201   2
  -1  -9  -7 15976.1 738.542   5
  -1  -9  -6 11471.7 617.816   5
  -1  -9  -6 11135.2 571.894   2
  -1  -9  -5 16122.6 651.933   2
  -1  -9  -5 16798.0 735.767   5
  -1  -9  -4 14899.5 592.202   2
  -1  -9  -4 14639.3 684.768   5
  -1  -9  -3 4644.60 308.826   2
  -1  -9  -3 4255.97 373.517   5
  -1  -9  -2 71677.0 1596.95   5
  -1  -9  -2 69401.7 1282.81   2
  -1  -9  -1 13974.9 481.612   2
  -1  -9  -1 13668.3 648.570   5
  -1  -9   0 26328.9 913.948   5
  -1  -9   0 26800.5 659.250   2
  -1  -9   1 6384.21 460.465   5
  -1  -9   1 5996.62 281.711   2
  -1  -9   2 18035.9 772.171   5
  -1  -9   2 17863.2 479.275   2
  -1  -9   3 18030.9 770.477   5
  -1  -9   3 17355.0 457.951   2
  -1  -9   4 4587.59 398.266   5
  -1  -9   5 11198.3 620.676   5
  -1  -9   6 1381.47 233.746   5
  -1  -9   6 891.790 146.122   1
  -1  -9   7 43792.2 1289.32   5
  -1  -9   7 46840.3 1087.90   1
  -1  -9   8-356.112 139.050   1
  -1  -9   8-51.3110 136.126   5
  -1  -9   9 19746.7 861.286   5
  -1  -9   9 19544.2 682.977   1
  -1  -9  10 78.3109 131.272   5
  -1  -9  10 102.770 74.2239   1
  -1  -9  11 6087.96 474.959   5
  -1  -9  11 6313.39 391.007   1
  -1  -9  12 522.010 177.080   5
  -1  -9  12 633.644 136.333   1
  -1  -9  13 9899.66 614.945   5
  -1  -9  13 8867.76 482.135   1
  -1  -9  14 3804.79 396.568   5
  -1  -9  14 3376.52 309.963   1
  -1  -9  15 6243.46 516.172   5
  -1  -9  15 4867.65 375.329   1
  -1  -9  16 8816.34 614.076   5
  -1  -9  16 7122.16 464.435   1
  -1  -9  17 1041.20 263.987   5
  -1  -9  17 777.214 184.415   1
  -1  -9  18 4427.11 471.279   5
  -1  -8 -19 2612.16 456.119   2
  -1  -8 -18 23.7802 201.378   2
  -1  -8 -17 5036.02 581.589   2
  -1  -8 -16-195.462 205.573   2
  -1  -8 -15 6893.53 649.859   2
  -1  -8 -15 6274.99 461.439   5
  -1  -8 -14 744.934 267.644   2
  -1  -8 -14 931.043 204.606   5
  -1  -8 -13 11128.8 624.524   5
  -1  -8 -13 11667.8 763.586   2
  -1  -8 -12 811.342 173.479   5
  -1  -8 -12 766.056 221.146   2
  -1  -8 -11 11352.3 634.235   5
  -1  -8 -11 10742.8 688.688   2
  -1  -8 -10 2465.18 333.043   2
  -1  -8 -10 2333.23 274.078   5
  -1  -8  -9 9621.71 597.920   2
  -1  -8  -9 9041.26 547.698   5
  -1  -8  -8 32074.1 1064.11   2
  -1  -8  -8 32121.7 1045.73   5
  -1  -8  -7 10641.5 576.348   2
  -1  -8  -7 9932.87 558.420   5
  -1  -8  -6 20822.4 775.835   2
  -1  -8  -6 19395.9 778.987   5
  -1  -8  -5 2530.81 278.310   5
  -1  -8  -5 2892.93 281.808   2
  -1  -8  -4 13094.2 551.274   2
  -1  -8  -4 12651.9 609.930   5
  -1  -8  -3 4057.54 289.191   2
  -1  -8  -3 4330.63 362.312   5
  -1  -8  -2 13298.5 491.437   2
  -1  -8  -2 14211.8 629.139   5
  -1  -8  -1 5843.14 301.857   2
  -1  -8  -1 6759.36 441.976   5
  -1  -8   0 21546.9 797.968   5
  -1  -8   0 20968.1 567.178   2
  -1  -8   1 30562.3 966.392   5
  -1  -8   1 30428.5 668.921   2
  -1  -8   2 10275.4 556.573   5
  -1  -8   2 10447.5 351.963   2
  -1  -8   3 30931.1 992.807   5
  -1  -8   3 34328.5 664.847   2
  -1  -8   4 853.858 176.373   5
  -1  -8   5 36450.0 1081.24   5
  -1  -8   6 9.35759 110.428   5
  -1  -8   6-19.3492 72.3898   1
  -1  -8   7 14276.6 487.381   3
  -1  -8   7 16322.0 705.610   5
  -1  -8   7 14895.0 552.200   1
  -1  -8   8 9003.00 528.166   5
  -1  -8   8 8445.68 415.433   1
  -1  -8   8 7651.72 332.719   3
  -1  -8   9 11815.4 616.855   5
  -1  -8   9 11786.9 506.030   1
  -1  -8  10 6684.84 380.019   1
  -1  -8  10 6318.10 441.131   5
  -1  -8  11 4417.32 382.967   5
  -1  -8  11 3826.11 296.707   1
  -1  -8  12 5225.48 416.731   5
  -1  -8  12 4788.10 334.159   1
  -1  -8  13 7226.12 486.152   5
  -1  -8  13 7352.80 427.768   1
  -1  -8  14 16358.3 768.153   5
  -1  -8  14 14742.8 634.856   1
  -1  -8  15 315.629 130.168   1
  -1  -8  15 88.1936 125.012   5
  -1  -8  16 7060.77 522.778   5
  -1  -8  16 6386.49 435.386   1
  -1  -8  17-223.211 165.042   5
  -1  -8  17 107.525 97.7288   1
  -1  -8  18 3665.84 339.552   1
  -1  -8  19-1142.79 227.400   1
  -1  -7 -19 7230.12 725.625   2
  -1  -7 -18 1931.43 396.859   2
  -1  -7 -17 13640.8 930.240   2
  -1  -7 -16 1376.95 322.052   2
  -1  -7 -15 6715.52 620.036   2
  -1  -7 -15 7012.40 467.658   5
  -1  -7 -14 773.013 252.773   2
  -1  -7 -14 974.108 198.626   5
  -1  -7 -13 5424.78 534.044   2
  -1  -7 -13 6707.24 449.799   5
  -1  -7 -12 3952.98 435.179   2
  -1  -7 -12 4108.39 359.511   5
  -1  -7 -11 6783.26 536.028   2
  -1  -7 -11 7189.69 462.494   5
  -1  -7 -10 15778.9 789.167   2
  -1  -7 -10 15761.0 673.114   5
  -1  -7  -9 114.114 120.086   2
  -1  -7  -9 38.2719 169.070   5
  -1  -7  -8 50401.7 1349.81   2
  -1  -7  -8 49159.0 1236.89   5
  -1  -7  -7 7462.31 482.569   2
  -1  -7  -7 6791.40 431.904   5
  -1  -7  -6 12841.3 596.495   2
  -1  -7  -6 11759.7 570.521   5
  -1  -7  -5 4929.76 351.554   2
  -1  -7  -5 4029.54 334.098   5
  -1  -7  -4 13601.7 556.808   2
  -1  -7  -4 13210.0 591.535   5
  -1  -7  -3 14961.1 556.548   2
  -1  -7  -3 15713.3 640.359   5
  -1  -7  -2 33639.3 814.447   2
  -1  -7  -2 33775.4 966.311   5
  -1  -7  -1 19602.3 566.458   2
  -1  -7  -1 18815.0 700.802   5
  -1  -7   0 19469.8 533.160   2
  -1  -7   0 18143.3 695.872   5
  -1  -7   1 33896.5 979.227   5
  -1  -7   1 35311.0 717.988   2
  -1  -7   2 4065.71 341.923   5
  -1  -7   2 4464.36 222.770   2
  -1  -7   3 35306.0 658.273   2
  -1  -7   3 31757.3 942.020   5
  -1  -7   4 348.221 82.1675   3
  -1  -7   4 265.713 121.549   5
  -1  -7   4 225.758 55.1652   2
  -1  -7   5 44335.9 1119.59   5
  -1  -7   5 43049.8 898.353   3
  -1  -7   6 6172.19 406.855   5
  -1  -7   6 5910.53 324.034   1
  -1  -7   6 5616.84 279.087   3
  -1  -7   7 32825.8 949.670   5
  -1  -7   7 29889.6 666.478   3
  -1  -7   7 32338.4 807.243   1
  -1  -7   8 33558.5 960.442   5
  -1  -7   8 29985.1 636.705   3
  -1  -7   8 33101.6 828.231   1
  -1  -7   9 12929.3 591.034   5
  -1  -7   9 13080.0 511.276   1
  -1  -7  10 42838.4 1125.59   5
  -1  -7  10 41732.9 989.155   1
  -1  -7  11 298.389 122.138   5
  -1  -7  11 219.667 116.119   1
  -1  -7  12 10073.3 539.197   5
  -1  -7  12 9847.13 474.729   1
  -1  -7  13 200.549 145.059   5
  -1  -7  13 154.447 85.8035   1
  -1  -7  14 27965.8 957.683   5
  -1  -7  14 28599.6 884.931   1
  -1  -7  15 150.520 101.377   1
  -1  -7  15 100.301 139.913   5
  -1  -7  16 5485.01 443.733   5
  -1  -7  16 4946.25 381.591   1
  -1  -7  17 598.266 159.661   1
  -1  -7  18 4164.21 369.156   1
  -1  -7  19 966.361 196.303   1
  -1  -7  20 997.826 209.253   1
  -1  -7  21 1666.83 284.917   1
  -1  -6 -20 348.018 274.953   2
  -1  -6 -19 9487.91 808.233   2
  -1  -6 -18 7661.24 713.866   2
  -1  -6 -17 3359.62 477.704   2
  -1  -6 -16 3411.24 324.639   5
  -1  -6 -15 5184.70 387.424   5
  -1  -6 -14 9216.84 497.232   5
  -1  -6 -13 3170.42 284.637   5
  -1  -6 -12 11009.4 519.209   5
  -1  -6 -11 163.434 110.175   5
  -1  -6 -10 18376.6 661.945   5
  -1  -6  -9-26.2815 113.125   5
  -1  -6  -8 23774.1 884.347   2
  -1  -6  -8 24518.6 764.884   5
  -1  -6  -7 8713.10 507.868   2
  -1  -6  -7 8443.43 447.564   5
  -1  -6  -6 28093.5 888.213   2
  -1  -6  -6 25493.7 798.111   5
  -1  -6  -5 2109.51 241.360   2
  -1  -6  -5 1981.88 216.369   5
  -1  -6  -4 44424.3 1048.44   2
  -1  -6  -4 43398.5 1067.23   5
  -1  -6  -3 13768.3 526.824   2
  -1  -6  -3 13670.8 572.207   5
  -1  -6  -2 27314.4 718.846   2
  -1  -6  -2 27905.2 827.975   5
  -1  -6  -1 23690.7 623.545   2
  -1  -6  -1 22933.2 750.789   5
  -1  -6   0 644.434 128.868   5
  -1  -6   0 766.897 109.016   2
  -1  -6   1 56970.9 1244.66   5
  -1  -6   1 60701.6 992.784   2
  -1  -6   1 62124.8 1142.40   3
  -1  -6   2 9495.40 455.872   5
  -1  -6   2 10767.5 413.096   3
  -1  -6   2 10037.7 320.956   2
  -1  -6   3 58709.8 1228.82   5
  -1  -6   3 57806.8 900.317   2
  -1  -6   3 59791.6 1072.90   3
  -1  -6   4 20036.1 661.408   5
  -1  -6   4 19894.3 448.956   2
  -1  -6   4 20291.0 544.277   3
  -1  -6   5 21259.9 685.743   5
  -1  -6   5 20818.5 530.955   3
  -1  -6   6 13360.7 537.806   5
  -1  -6   6 13288.0 467.548   1
  -1  -6   6 13315.5 391.173   3
  -1  -6   7 16705.8 611.057   5
  -1  -6   7 15235.3 399.111   3
  -1  -6   7 16289.0 529.027   1
  -1  -6   8 35469.9 936.866   5
  -1  -6   8 38454.1 873.161   1
  -1  -6   9 3598.23 291.763   5
  -1  -6   9 3958.23 268.914   1
  -1  -6  10 30292.8 872.143   5
  -1  -6  10 30736.9 804.490   1
  -1  -6  11 756.496 178.633   5
  -1  -6  11 664.620 135.814   1
  -1  -6  12 44295.1 1126.01   5
  -1  -6  12 44714.7 1053.23   1
  -1  -6  13 2413.93 266.447   5
  -1  -6  13 2502.02 247.117   1
  -1  -6  14 15907.1 685.571   5
  -1  -6  14 15648.1 629.617   1
  -1  -6  15 3739.25 333.772   5
  -1  -6  15 3821.97 317.297   1
  -1  -6  16 4929.46 373.145   1
  -1  -6  17 7339.12 474.913   1
  -1  -6  18 3591.11 344.901   1
  -1  -6  19 3368.31 349.835   1
  -1  -6  20-297.256 151.918   1
  -1  -6  21 6629.59 514.952   1
  -1  -6  22 209.195 168.735   1
  -1  -6  23 4564.14 471.693   1
  -1  -5 -21 1464.10 343.898   2
  -1  -5 -21 2121.07 339.539   8
  -1  -5 -20 4312.30 551.949   2
  -1  -5 -20 5989.07 546.753   8
  -1  -5 -19 11981.2 751.458   8
  -1  -5 -18 9054.38 624.955   8
  -1  -5 -17 4363.97 436.189   8
  -1  -5 -16 10589.9 631.992   8
  -1  -5 -16 10928.1 524.364   5
  -1  -5 -15 966.602 205.543   8
  -1  -5 -15 1016.51 188.900   5
  -1  -5 -14 24110.2 909.719   8
  -1  -5 -14 25518.4 777.123   5
  -1  -5 -13-55.3519 120.429   8
  -1  -5 -13-15.6348 96.8384   5
  -1  -5 -12 30699.3 972.549   8
  -1  -5 -12 31620.0 843.573   5
  -1  -5 -11 1936.33 242.247   8
  -1  -5 -11 2173.73 220.045   5
  -1  -5 -10 26580.4 852.840   8
  -1  -5 -10 26303.2 739.327   5
  -1  -5  -9 5238.46 318.678   5
  -1  -5  -8 17575.5 575.970   5
  -1  -5  -7 23158.7 670.376   5
  -1  -5  -6 20809.2 748.146   2
  -1  -5  -6 20706.4 637.966   5
  -1  -5  -5 13529.9 567.118   2
  -1  -5  -5 12079.9 485.370   5
  -1  -5  -4 10621.3 478.373   2
  -1  -5  -4 9371.95 432.544   5
  -1  -5  -3 31486.6 800.247   6
  -1  -5  -3 35565.2 865.447   2
  -1  -5  -3 34012.5 876.939   5
  -1  -5  -2 6570.54 335.164   2
  -1  -5  -2 6100.80 351.061   5
  -1  -5  -1 73928.1 1274.92   3
  -1  -5  -1 79782.0 1276.37   2
  -1  -5  -1 75484.7 1405.49   5
  -1  -5   0 1387.62 172.546   5
  -1  -5   0 1714.46 150.525   2
  -1  -5   0 1874.00 168.954   3
  -1  -5   1 34773.2 674.778   2
  -1  -5   1 35561.4 859.619   5
  -1  -5   1 36976.2 774.471   3
  -1  -5   2 30958.7 777.965   5
  -1  -5   2 30739.4 589.559   2
  -1  -5   2 31723.0 692.348   3
  -1  -5   3 35052.9 825.453   5
  -1  -5   3 33272.8 608.618   2
  -1  -5   3 34783.1 709.491   3
  -1  -5   4 13034.9 473.148   5
  -1  -5   4 12989.8 380.223   3
  -1  -5   4 12625.5 340.018   2
  -1  -5   5 39798.4 889.730   5
  -1  -5   5 39264.4 694.894   3
  -1  -5   6 56349.9 841.680   3
  -1  -5   6 58099.8 1039.19   1
  -1  -5   6 55579.3 1104.97   5
  -1  -5   7 15459.4 537.435   5
  -1  -5   7 14859.5 483.715   1
  -1  -5   8 68178.6 1299.75   5
  -1  -5   8 71571.7 1243.52   1
  -1  -5   9 1394.68 189.615   5
  -1  -5   9 1370.03 164.878   1
  -1  -5  10 48357.6 1085.11   5
  -1  -5  10 48514.2 1023.36   1
  -1  -5  11 8814.85 449.544   5
  -1  -5  11 8848.45 417.327   1
  -1  -5  12 38126.2 1001.79   5
  -1  -5  12 39052.6 958.046   1
  -1  -5  13 8450.61 464.297   5
  -1  -5  13 8874.74 447.957   1
  -1  -5  14 14150.5 617.445   5
  -1  -5  14 13014.9 563.575   1
  -1  -5  15 16796.1 666.229   1
  -1  -5  16 7337.66 450.585   1
  -1  -5  17 16451.0 709.865   1
  -1  -5  18 1460.13 231.791   1
  -1  -5  19 11260.5 626.293   1
  -1  -5  20 317.396 145.088   1
  -1  -5  21 4860.41 443.882   1
  -1  -5  22-333.369 179.099   1
  -1  -5  23 2827.74 376.066   1
  -1  -5  24-43.6133 158.108   1
  -1  -4 -22 1451.17 293.285   8
  -1  -4 -21 9145.06 829.529   2
  -1  -4 -21 11420.3 750.041   8
  -1  -4 -20 4818.67 467.122   8
  -1  -4 -19 5585.48 490.460   8
  -1  -4 -18 9724.75 625.752   8
  -1  -4 -17 1579.13 259.732   8
  -1  -4 -16 20380.2 849.181   8
  -1  -4 -15 1610.63 243.616   8
  -1  -4 -14 32981.5 1029.11   8
  -1  -4 -13 1516.51 224.285   8
  -1  -4 -12 33602.3 975.133   8
  -1  -4 -11 6726.12 411.224   8
  -1  -4 -11 6587.67 332.750   5
  -1  -4 -10 5888.19 367.786   8
  -1  -4 -10 5498.07 290.996   5
  -1  -4  -9 8493.30 428.974   8
  -1  -4  -9 8048.17 347.021   5
  -1  -4  -8 8396.85 411.977   8
  -1  -4  -8 8337.55 353.195   5
  -1  -4  -7 24080.4 612.552   5
  -1  -4  -6 8542.49 349.668   5
  -1  -4  -5 11934.8 524.857   2
[truncated: 530,040 more chars]
