# Supplementary material for: A Series of Novel Pentagonal-Bipyramidal Erbium(III) Complexes with Acyclic Chelating N3O2 Schiff-Base Ligands: Synthesis, Structure, and Magnetism
Source: Molecules. 2021 Nov 16;26(22):6908. doi: 10.3390/molecules26226908 (PMC8622354; doi:10.3390/molecules26226908)
Supplement: Supplementary file 1 [file molecules-26-06908-s001.zip › Supplementary files/4.cif]

####################################################################### 
# 
# This file contains crystal structure data downloaded from the 
# Cambridge Structural Database (CSD) hosted by the Cambridge 
# Crystallographic Data Centre (CCDC).
# 
# Full information about CCDC data access policies and citation 
# guidelines are available at http://www.ccdc.cam.ac.uk/access/V1 
# 
# Audit and citation data items may have been added by the CCDC. 
# Please retain this information to preserve the provenance of 
# this file and to allow appropriate attribution of the data. 
# 
#######################################################################

data_er2
_database_code_depnum_ccdc_archive 'CCDC 2100722'
loop_
_audit_author_name
_audit_author_address
'Ilya Yakushev'
;Kurnakov Institute of general and inorganic chemistry, RAS
Russia
;
_audit_update_record             
;
2021-08-05 deposited with the CCDC.	2021-09-01 downloaded from the CCDC.
;
# start Validation Reply Form
_vrf_PLAT972_er2                 
;
PROBLEM: Check Calcd Resid. Dens.  0.72A   From Er1            -4.45 eA-3
RESPONSE: In our opinion, the unefficient absorption correction (rather usual at synchrotron radiation wavelength ca. 0.8 A) are responsible of the residual densities on heavy atom.
;
# Added during the CSD deposition process: Thursday 05 August 2021 09:37 PM
# end Validation Reply Form


_audit_creation_method           SHELXL-2014/7
_shelx_SHELXL_version_number     2014/7
_chemical_name_systematic        ?
_chemical_name_common            ?
_chemical_melting_point          ?
_chemical_formula_moiety         'C26 H27 Er N8 O5'
_chemical_formula_sum            'C26 H27 Er N8 O5'
_chemical_formula_weight         698.81

loop_
_atom_type_symbol
_atom_type_description
_atom_type_scat_dispersion_real
_atom_type_scat_dispersion_imag
_atom_type_scat_source
C C 0.0046 0.0021 'International Tables Vol C Tables 4.2.6.8 and 6.1.1.4'
H H 0.0000 0.0000 'International Tables Vol C Tables 4.2.6.8 and 6.1.1.4'
Er Er -0.3219 5.9117 'International Tables Vol C Tables 4.2.6.8 and 6.1.1.4'
N N 0.0084 0.0041 'International Tables Vol C Tables 4.2.6.8 and 6.1.1.4'
O O 0.0146 0.0077 'International Tables Vol C Tables 4.2.6.8 and 6.1.1.4'

_space_group_crystal_system      monoclinic
_space_group_IT_number           14
_space_group_name_H-M_alt        'P 21/c'
_space_group_name_Hall           '-P 2ybc'

_shelx_space_group_comment       
;
The symmetry employed for this shelxl refinement is uniquely defined
by the following loop, which should always be used as a source of
symmetry information in preference to the above space-group names.
They are only intended as comments.
;

loop_
_space_group_symop_operation_xyz
'x, y, z'
'-x, y+1/2, -z+1/2'
'-x, -y, -z'
'x, -y-1/2, z-1/2'

_cell_length_a                   13.869(3)
_cell_length_b                   10.631(2)
_cell_length_c                   17.890(4)
_cell_angle_alpha                90
_cell_angle_beta                 97.234(3)
_cell_angle_gamma                90
_cell_volume                     2616.7(10)
_cell_formula_units_Z            4
_cell_measurement_temperature    100(2)
_cell_measurement_reflns_used    13379
_cell_measurement_theta_min      1.641
_cell_measurement_theta_max      28.003

_exptl_crystal_description       prism
_exptl_crystal_colour            yellow
_exptl_crystal_density_meas      'not measured'
_exptl_crystal_density_method    ?
_exptl_crystal_density_diffrn    1.774
_exptl_crystal_F_000             1388
_exptl_transmission_factor_min   ?
_exptl_transmission_factor_max   ?
_exptl_crystal_size_max          0.100
_exptl_crystal_size_mid          0.080
_exptl_crystal_size_min          0.060
_exptl_absorpt_coefficient_mu    4.270
_shelx_estimated_absorpt_T_min   0.675
_shelx_estimated_absorpt_T_max   0.784
_exptl_absorpt_correction_type   empirical
_exptl_absorpt_correction_T_min  0.001
_exptl_absorpt_correction_T_max  1.000
_exptl_absorpt_process_details   'XDS (Kabsch, 2010)'
_exptl_absorpt_special_details   ?
_diffrn_ambient_temperature      100(2)
_diffrn_radiation_wavelength     0.7879
_diffrn_radiation_type           synchrotron
_diffrn_source                   ?
_diffrn_measurement_device_type  'Rayonix SX165 CCD'
_diffrn_measurement_method       \f
_diffrn_detector_area_resol_mean ?
_diffrn_reflns_number            17989
_diffrn_reflns_av_unetI/netI     0.0349
_diffrn_reflns_av_R_equivalents  0.0430
_diffrn_reflns_limit_h_min       -16
_diffrn_reflns_limit_h_max       16
_diffrn_reflns_limit_k_min       -12
_diffrn_reflns_limit_k_max       12
_diffrn_reflns_limit_l_min       -21
_diffrn_reflns_limit_l_max       21
_diffrn_reflns_theta_min         1.641
_diffrn_reflns_theta_max         28.003
_diffrn_reflns_theta_full        28.003
_diffrn_measured_fraction_theta_max 0.996
_diffrn_measured_fraction_theta_full 0.996
_diffrn_reflns_Laue_measured_fraction_max 0.996
_diffrn_reflns_Laue_measured_fraction_full 0.996
_diffrn_reflns_point_group_measured_fraction_max 0.996
_diffrn_reflns_point_group_measured_fraction_full 0.996
_reflns_number_total             4628
_reflns_number_gt                3912
_reflns_threshold_expression     'I > 2\s(I)'
_reflns_Friedel_coverage         0.000
_reflns_Friedel_fraction_max     .
_reflns_Friedel_fraction_full    .

_reflns_special_details          
;
 Reflections were merged by SHELXL according to the crystal
 class for the calculation of statistics and refinement.
 
 _reflns_Friedel_fraction is defined as the number of unique
 Friedel pairs measured divided by the number that would be
 possible theoretically, ignoring centric projections and
 systematic absences.
;

_computing_data_collection       'Marccd (Doyle, 2011)'
_computing_cell_refinement       'XDS (Kabsch, 2010)'
_computing_data_reduction        XDS
_computing_structure_solution    'SHELXT-2014/5 (Sheldrick, 2014)'
_computing_structure_refinement  'SHELXL-2014/7 (Sheldrick, 2014)'
_computing_molecular_graphics    'Bruker SHELXTL'
_computing_publication_material  'Bruker SHELXTL'
_refine_special_details          ?
_refine_ls_structure_factor_coef Fsqd
_refine_ls_matrix_type           full
_refine_ls_weighting_scheme      calc
_refine_ls_weighting_details     
'w=1/[\s^2^(Fo^2^)+(0.0738P)^2^+20.1986P] where P=(Fo^2^+2Fc^2^)/3'
_atom_sites_solution_primary     difmap
_atom_sites_solution_secondary   ?
_atom_sites_solution_hydrogens   mixed
_refine_ls_hydrogen_treatment    mixed
_refine_ls_extinction_method     'SHELXL-2014/7 (Sheldrick 2014'
_refine_ls_extinction_coef       0.0088(6)
_refine_ls_extinction_expression Fc^*^=kFc[1+0.001xFc^2^\l^3^/sin(2\q)]^-1/4^
_refine_ls_number_reflns         4628
_refine_ls_number_parameters     370
_refine_ls_number_restraints     0
_refine_ls_R_factor_all          0.0629
_refine_ls_R_factor_gt           0.0537
_refine_ls_wR_factor_ref         0.1417
_refine_ls_wR_factor_gt          0.1348
_refine_ls_goodness_of_fit_ref   1.062
_refine_ls_restrained_S_all      1.062
_refine_ls_shift/su_max          0.001
_refine_ls_shift/su_mean         0.000

loop_
_atom_site_label
_atom_site_type_symbol
_atom_site_fract_x
_atom_site_fract_y
_atom_site_fract_z
_atom_site_U_iso_or_equiv
_atom_site_adp_type
_atom_site_occupancy
_atom_site_site_symmetry_order
_atom_site_calc_flag
_atom_site_refinement_flags_posn
_atom_site_refinement_flags_adp
_atom_site_refinement_flags_occupancy
_atom_site_disorder_assembly
_atom_site_disorder_group
Er1 Er 0.74143(2) 0.50864(3) 0.54589(2) 0.0281(2) Uani 1 1 d . . . . .
O1 O 0.8457(4) 0.3539(5) 0.5862(3) 0.0305(12) Uani 1 1 d . . . . .
O2 O 0.6356(4) 0.4765(6) 0.6317(3) 0.0350(13) Uani 1 1 d . . . . .
O3 O 1.1793(4) -0.0568(6) 0.6542(3) 0.0479(15) Uani 1 1 d . . . . .
O4 O 0.3414(4) 0.4525(6) 0.8725(3) 0.0405(13) Uani 1 1 d . . . . .
O5 O 0.6611(4) 0.3494(5) 0.4749(3) 0.0321(12) Uani 1 1 d . . . . .
H5 H 0.600(7) 0.357(9) 0.453(5) 0.048 Uiso 1 1 d . U . . .
N1 N 0.9270(4) 0.3726(6) 0.4802(3) 0.0288(13) Uani 1 1 d . . . . .
N2 N 0.8598(4) 0.4666(6) 0.4616(3) 0.0285(13) Uani 1 1 d . . . . .
N3 N 0.7220(4) 0.6337(6) 0.4309(3) 0.0280(13) Uani 1 1 d . . . . .
N4 N 0.5927(4) 0.6353(6) 0.5255(3) 0.0271(13) Uani 1 1 d . . . . .
N5 N 0.5279(4) 0.6289(6) 0.5792(3) 0.0266(13) Uani 1 1 d . . . . .
N6 N 0.8200(5) 0.6609(7) 0.6145(4) 0.0366(15) Uani 1 1 d . . . . .
N7 N 0.8774(5) 0.7320(6) 0.6462(3) 0.0324(14) Uani 1 1 d . . . . .
N8 N 0.9323(5) 0.8015(7) 0.6772(4) 0.0415(17) Uani 1 1 d . . . . .
C1 C 1.1766(7) -0.1062(10) 0.7277(5) 0.048(2) Uani 1 1 d . . . . .
H1A H 1.1114 -0.1385 0.7320 0.073 Uiso 1 1 calc R U . . .
H1B H 1.1927 -0.0396 0.7651 0.073 Uiso 1 1 calc R U . . .
H1C H 1.2240 -0.1747 0.7369 0.073 Uiso 1 1 calc R U . . .
C2 C 0.9792(5) 0.1729(8) 0.6467(4) 0.0316(16) Uani 1 1 d . . . . .
H2 H 0.9331 0.2048 0.6769 0.038 Uiso 1 1 calc R U . . .
C3 C 1.0437(6) 0.0805(8) 0.6757(4) 0.0322(16) Uani 1 1 d . . . . .
H3 H 1.0425 0.0504 0.7255 0.039 Uiso 1 1 calc R U . . .
C4 C 1.1100(6) 0.0325(8) 0.6313(5) 0.0359(18) Uani 1 1 d . . . . .
C5 C 1.1120(6) 0.0783(9) 0.5583(5) 0.043(2) Uani 1 1 d . . . . .
H5A H 1.1579 0.0461 0.5280 0.052 Uiso 1 1 calc R U . . .
C6 C 1.0472(6) 0.1702(9) 0.5303(4) 0.0389(19) Uani 1 1 d . . . . .
H6 H 1.0482 0.2000 0.4804 0.047 Uiso 1 1 calc R U . . .
C7 C 0.9804(5) 0.2199(7) 0.5741(4) 0.0279(15) Uani 1 1 d . . . . .
C8 C 0.9127(5) 0.3213(7) 0.5455(4) 0.0301(16) Uani 1 1 d . . . . .
C9 C 0.9301(6) 0.4872(7) 0.3430(4) 0.0312(17) Uani 1 1 d . . . . .
H9A H 0.9922 0.4602 0.3706 0.047 Uiso 1 1 calc R U . . .
H9B H 0.9408 0.5602 0.3117 0.047 Uiso 1 1 calc R U . . .
H9C H 0.9023 0.4183 0.3109 0.047 Uiso 1 1 calc R U . . .
C10 C 0.8610(5) 0.5223(7) 0.3982(4) 0.0281(16) Uani 1 1 d . . . . .
C11 C 0.7848(5) 0.6199(7) 0.3799(4) 0.0286(16) Uani 1 1 d . . . . .
C12 C 0.7774(5) 0.6915(8) 0.3144(4) 0.0333(17) Uani 1 1 d . . . . .
H12 H 0.8226 0.6810 0.2792 0.040 Uiso 1 1 calc R U . . .
C13 C 0.7027(6) 0.7783(8) 0.3017(4) 0.0338(17) Uani 1 1 d . . . . .
H13 H 0.6957 0.8275 0.2570 0.041 Uiso 1 1 calc R U . . .
C14 C 0.6385(5) 0.7934(7) 0.3540(4) 0.0311(16) Uani 1 1 d . . . . .
H14 H 0.5878 0.8537 0.3465 0.037 Uiso 1 1 calc R U . . .
C15 C 0.6500(5) 0.7176(7) 0.4184(4) 0.0267(15) Uani 1 1 d . . . . .
C16 C 0.5805(5) 0.7230(7) 0.4753(4) 0.0265(15) Uani 1 1 d . . . . .
C17 C 0.5055(6) 0.8242(8) 0.4706(5) 0.0353(18) Uani 1 1 d . . . . .
H17A H 0.4484 0.7981 0.4363 0.053 Uiso 1 1 calc R U . . .
H17B H 0.5323 0.9016 0.4517 0.053 Uiso 1 1 calc R U . . .
H17C H 0.4867 0.8395 0.5209 0.053 Uiso 1 1 calc R U . . .
C18 C 0.5593(5) 0.5421(8) 0.6317(4) 0.0278(15) Uani 1 1 d . . . . .
C19 C 0.4994(5) 0.5245(7) 0.6952(4) 0.0266(15) Uani 1 1 d . . . . .
C20 C 0.4217(5) 0.6013(8) 0.7058(4) 0.0306(16) Uani 1 1 d . . . . .
H20 H 0.4052 0.6693 0.6721 0.037 Uiso 1 1 calc R U . . .
C21 C 0.3671(5) 0.5807(8) 0.7649(4) 0.0340(17) Uani 1 1 d . . . . .
H21 H 0.3138 0.6340 0.7715 0.041 Uiso 1 1 calc R U . . .
C22 C 0.3913(6) 0.4822(8) 0.8137(4) 0.0343(18) Uani 1 1 d . . . . .
C23 C 0.4695(6) 0.4071(8) 0.8046(4) 0.0342(17) Uani 1 1 d . . . . .
H23 H 0.4868 0.3406 0.8391 0.041 Uiso 1 1 calc R U . . .
C24 C 0.5231(5) 0.4274(7) 0.7458(4) 0.0305(16) Uani 1 1 d . . . . .
H24 H 0.5768 0.3743 0.7400 0.037 Uiso 1 1 calc R U . . .
C25 C 0.2523(7) 0.5182(10) 0.8777(5) 0.049(2) Uani 1 1 d . . . . .
H25A H 0.2124 0.5178 0.8284 0.073 Uiso 1 1 calc R U . . .
H25B H 0.2667 0.6053 0.8934 0.073 Uiso 1 1 calc R U . . .
H25C H 0.2169 0.4766 0.9148 0.073 Uiso 1 1 calc R U . . .
C26 C 0.7068(7) 0.2367(9) 0.4424(6) 0.050(2) Uani 1 1 d . . . . .
H26A H 0.6563 0.1865 0.4129 0.075 Uiso 1 1 calc R U . . .
H26B H 0.7397 0.1852 0.4834 0.075 Uiso 1 1 calc R U . . .
H26C H 0.7542 0.2649 0.4097 0.075 Uiso 1 1 calc R U . . .

loop_
_atom_site_aniso_label
_atom_site_aniso_U_11
_atom_site_aniso_U_22
_atom_site_aniso_U_33
_atom_site_aniso_U_23
_atom_site_aniso_U_13
_atom_site_aniso_U_12
Er1 0.0226(2) 0.0408(3) 0.0213(2) 0.00281(14) 0.00465(14) 0.00165(14)
O1 0.021(2) 0.046(3) 0.025(3) 0.005(2) 0.005(2) 0.009(2)
O2 0.025(3) 0.052(3) 0.029(3) 0.008(2) 0.007(2) 0.007(2)
O3 0.043(3) 0.058(4) 0.044(3) 0.017(3) 0.013(3) 0.018(3)
O4 0.041(3) 0.055(3) 0.030(3) 0.007(3) 0.018(2) -0.003(3)
O5 0.026(3) 0.038(3) 0.030(3) -0.002(2) -0.003(2) 0.001(2)
N1 0.024(3) 0.039(3) 0.023(3) 0.005(3) 0.001(2) 0.003(3)
N2 0.023(3) 0.041(3) 0.021(3) -0.001(3) 0.001(2) 0.000(3)
N3 0.027(3) 0.038(3) 0.019(3) -0.001(3) 0.004(2) -0.002(3)
N4 0.019(3) 0.042(4) 0.020(3) 0.000(3) 0.002(2) -0.002(2)
N5 0.023(3) 0.037(3) 0.021(3) 0.001(3) 0.008(2) 0.001(2)
N6 0.034(4) 0.049(4) 0.028(3) -0.002(3) 0.006(3) 0.003(3)
N7 0.030(3) 0.044(4) 0.024(3) -0.002(3) 0.007(3) 0.001(3)
N8 0.042(4) 0.048(4) 0.037(4) -0.002(3) 0.010(3) -0.005(3)
C1 0.040(5) 0.062(6) 0.044(5) 0.023(5) 0.005(4) 0.011(4)
C2 0.026(4) 0.045(4) 0.026(4) 0.006(3) 0.007(3) 0.000(3)
C3 0.032(4) 0.040(4) 0.024(4) 0.007(3) 0.003(3) 0.000(3)
C4 0.031(4) 0.045(4) 0.031(4) 0.006(4) 0.004(3) 0.003(4)
C5 0.044(5) 0.058(5) 0.031(4) 0.010(4) 0.016(4) 0.016(4)
C6 0.038(5) 0.056(5) 0.024(4) 0.002(4) 0.007(3) 0.009(4)
C7 0.021(3) 0.037(4) 0.025(4) 0.002(3) 0.001(3) 0.001(3)
C8 0.024(4) 0.039(4) 0.028(4) -0.001(3) 0.005(3) -0.002(3)
C9 0.029(4) 0.046(5) 0.020(4) 0.002(3) 0.007(3) 0.005(3)
C10 0.027(4) 0.038(4) 0.021(4) -0.003(3) 0.007(3) 0.000(3)
C11 0.023(4) 0.041(4) 0.022(4) 0.004(3) 0.005(3) -0.002(3)
C12 0.024(4) 0.051(5) 0.026(4) 0.001(3) 0.008(3) 0.000(3)
C13 0.030(4) 0.049(5) 0.023(4) 0.007(3) 0.004(3) -0.001(3)
C14 0.028(4) 0.040(4) 0.026(4) 0.004(3) 0.004(3) -0.001(3)
C15 0.022(3) 0.040(4) 0.019(3) -0.001(3) 0.004(3) -0.004(3)
C16 0.022(3) 0.038(4) 0.020(3) -0.004(3) 0.003(3) -0.002(3)
C17 0.036(4) 0.044(4) 0.028(4) 0.006(3) 0.013(3) 0.006(3)
C18 0.023(4) 0.041(4) 0.020(3) -0.002(3) 0.005(3) -0.001(3)
C19 0.024(4) 0.035(4) 0.021(3) 0.000(3) 0.005(3) -0.004(3)
C20 0.030(4) 0.041(4) 0.021(3) 0.000(3) 0.001(3) -0.003(3)
C21 0.026(4) 0.048(5) 0.029(4) -0.004(4) 0.004(3) 0.000(3)
C22 0.030(4) 0.054(5) 0.019(4) -0.001(3) 0.007(3) -0.007(3)
C23 0.035(4) 0.044(4) 0.024(4) 0.003(3) 0.006(3) -0.005(3)
C24 0.027(4) 0.039(4) 0.026(4) 0.003(3) 0.006(3) 0.002(3)
C25 0.037(5) 0.074(7) 0.039(5) 0.006(4) 0.020(4) -0.002(4)
C26 0.045(5) 0.053(5) 0.051(5) -0.008(5) 0.002(4) 0.005(4)

_geom_special_details            
;
 All esds (except the esd in the dihedral angle between two l.s. planes)
 are estimated using the full covariance matrix.  The cell esds are taken
 into account individually in the estimation of esds in distances, angles
 and torsion angles; correlations between esds in cell parameters are only
 used when they are defined by crystal symmetry.  An approximate (isotropic)
 treatment of cell esds is used for estimating esds involving l.s. planes.
;

loop_
_geom_bond_atom_site_label_1
_geom_bond_atom_site_label_2
_geom_bond_distance
_geom_bond_site_symmetry_2
_geom_bond_publ_flag
Er1 N6 2.232(7) . ?
Er1 O1 2.248(5) . ?
Er1 O2 2.278(5) . ?
Er1 O5 2.316(5) . ?
Er1 N2 2.407(6) . ?
Er1 N3 2.436(6) . ?
Er1 N4 2.452(6) . ?
O1 C8 1.298(9) . ?
O2 C18 1.268(9) . ?
O3 C4 1.376(10) . ?
O3 C1 1.422(10) . ?
O4 C22 1.367(9) . ?
O4 C25 1.432(11) . ?
O5 C26 1.507(10) . ?
O5 H5 0.89(10) . ?
N1 C8 1.326(9) . ?
N1 N2 1.379(9) . ?
N2 C10 1.281(10) . ?
N3 C15 1.337(10) . ?
N3 C11 1.346(9) . ?
N4 C16 1.292(9) . ?
N4 N5 1.396(8) . ?
N5 C18 1.349(10) . ?
N6 N7 1.187(10) . ?
N7 N8 1.152(10) . ?
C1 H1A 0.9800 . ?
C1 H1B 0.9800 . ?
C1 H1C 0.9800 . ?
C2 C3 1.384(11) . ?
C2 C7 1.393(10) . ?
C2 H2 0.9500 . ?
C3 C4 1.386(11) . ?
C3 H3 0.9500 . ?
C4 C5 1.397(11) . ?
C5 C6 1.378(12) . ?
C5 H5A 0.9500 . ?
C6 C7 1.391(11) . ?
C6 H6 0.9500 . ?
C7 C8 1.479(10) . ?
C9 C10 1.508(10) . ?
C9 H9A 0.9800 . ?
C9 H9B 0.9800 . ?
C9 H9C 0.9800 . ?
C10 C11 1.487(11) . ?
C11 C12 1.390(10) . ?
C12 C13 1.385(12) . ?
C12 H12 0.9500 . ?
C13 C14 1.380(11) . ?
C13 H13 0.9500 . ?
C14 C15 1.397(10) . ?
C14 H14 0.9500 . ?
C15 C16 1.488(9) . ?
C16 C17 1.492(11) . ?
C17 H17A 0.9800 . ?
C17 H17B 0.9800 . ?
C17 H17C 0.9800 . ?
C18 C19 1.501(10) . ?
C19 C20 1.385(11) . ?
C19 C24 1.385(11) . ?
C20 C21 1.393(11) . ?
C20 H20 0.9500 . ?
C21 C22 1.377(12) . ?
C21 H21 0.9500 . ?
C22 C23 1.373(12) . ?
C23 C24 1.380(10) . ?
C23 H23 0.9500 . ?
C24 H24 0.9500 . ?
C25 H25A 0.9800 . ?
C25 H25B 0.9800 . ?
C25 H25C 0.9800 . ?
C26 H26A 0.9800 . ?
C26 H26B 0.9800 . ?
C26 H26C 0.9800 . ?

loop_
_geom_angle_atom_site_label_1
_geom_angle_atom_site_label_2
_geom_angle_atom_site_label_3
_geom_angle
_geom_angle_site_symmetry_1
_geom_angle_site_symmetry_3
_geom_angle_publ_flag
N6 Er1 O1 96.0(2) . . ?
N6 Er1 O2 92.9(2) . . ?
O1 Er1 O2 96.72(19) . . ?
N6 Er1 O5 179.5(2) . . ?
O1 Er1 O5 83.5(2) . . ?
O2 Er1 O5 87.3(2) . . ?
N6 Er1 N2 98.9(2) . . ?
O1 Er1 N2 66.6(2) . . ?
O2 Er1 N2 160.4(2) . . ?
O5 Er1 N2 80.8(2) . . ?
N6 Er1 N3 93.6(2) . . ?
O1 Er1 N3 131.94(19) . . ?
O2 Er1 N3 129.7(2) . . ?
O5 Er1 N3 86.7(2) . . ?
N2 Er1 N3 65.4(2) . . ?
N6 Er1 N4 91.5(2) . . ?
O1 Er1 N4 160.85(19) . . ?
O2 Er1 N4 65.25(19) . . ?
O5 Er1 N4 89.0(2) . . ?
N2 Er1 N4 129.5(2) . . ?
N3 Er1 N4 64.7(2) . . ?
C8 O1 Er1 119.5(5) . . ?
C18 O2 Er1 121.7(5) . . ?
C4 O3 C1 115.5(7) . . ?
C22 O4 C25 117.5(7) . . ?
C26 O5 Er1 126.6(5) . . ?
C26 O5 H5 109(6) . . ?
Er1 O5 H5 122(6) . . ?
C8 N1 N2 109.8(6) . . ?
C10 N2 N1 117.7(6) . . ?
C10 N2 Er1 123.7(5) . . ?
N1 N2 Er1 118.5(4) . . ?
C15 N3 C11 119.5(6) . . ?
C15 N3 Er1 120.4(4) . . ?
C11 N3 Er1 120.0(5) . . ?
C16 N4 N5 118.3(6) . . ?
C16 N4 Er1 122.3(5) . . ?
N5 N4 Er1 118.3(4) . . ?
C18 N5 N4 109.4(6) . . ?
N7 N6 Er1 167.3(6) . . ?
N8 N7 N6 179.4(9) . . ?
O3 C1 H1A 109.5 . . ?
O3 C1 H1B 109.5 . . ?
H1A C1 H1B 109.5 . . ?
O3 C1 H1C 109.5 . . ?
H1A C1 H1C 109.5 . . ?
H1B C1 H1C 109.5 . . ?
C3 C2 C7 121.3(7) . . ?
C3 C2 H2 119.4 . . ?
C7 C2 H2 119.4 . . ?
C2 C3 C4 119.4(7) . . ?
C2 C3 H3 120.3 . . ?
C4 C3 H3 120.3 . . ?
O3 C4 C3 125.0(7) . . ?
O3 C4 C5 115.0(7) . . ?
C3 C4 C5 120.0(8) . . ?
C6 C5 C4 119.8(8) . . ?
C6 C5 H5A 120.1 . . ?
C4 C5 H5A 120.1 . . ?
C5 C6 C7 121.0(7) . . ?
C5 C6 H6 119.5 . . ?
C7 C6 H6 119.5 . . ?
C6 C7 C2 118.4(7) . . ?
C6 C7 C8 121.4(7) . . ?
C2 C7 C8 120.2(7) . . ?
O1 C8 N1 125.6(7) . . ?
O1 C8 C7 117.9(6) . . ?
N1 C8 C7 116.5(6) . . ?
C10 C9 H9A 109.5 . . ?
C10 C9 H9B 109.5 . . ?
H9A C9 H9B 109.5 . . ?
C10 C9 H9C 109.5 . . ?
H9A C9 H9C 109.5 . . ?
H9B C9 H9C 109.5 . . ?
N2 C10 C11 115.4(6) . . ?
N2 C10 C9 123.0(7) . . ?
C11 C10 C9 121.4(6) . . ?
N3 C11 C12 121.7(7) . . ?
N3 C11 C10 115.4(6) . . ?
C12 C11 C10 122.9(7) . . ?
C13 C12 C11 118.6(7) . . ?
C13 C12 H12 120.7 . . ?
C11 C12 H12 120.7 . . ?
C14 C13 C12 119.9(7) . . ?
C14 C13 H13 120.1 . . ?
C12 C13 H13 120.1 . . ?
C13 C14 C15 118.4(7) . . ?
C13 C14 H14 120.8 . . ?
C15 C14 H14 120.8 . . ?
N3 C15 C14 121.9(6) . . ?
N3 C15 C16 116.4(6) . . ?
C14 C15 C16 121.7(7) . . ?
N4 C16 C15 114.1(6) . . ?
N4 C16 C17 126.1(6) . . ?
C15 C16 C17 119.8(6) . . ?
C16 C17 H17A 109.5 . . ?
C16 C17 H17B 109.5 . . ?
H17A C17 H17B 109.5 . . ?
C16 C17 H17C 109.5 . . ?
H17A C17 H17C 109.5 . . ?
H17B C17 H17C 109.5 . . ?
O2 C18 N5 124.9(6) . . ?
O2 C18 C19 118.2(7) . . ?
N5 C18 C19 116.8(6) . . ?
C20 C19 C24 118.4(7) . . ?
C20 C19 C18 123.0(7) . . ?
C24 C19 C18 118.6(7) . . ?
C19 C20 C21 121.2(7) . . ?
C19 C20 H20 119.4 . . ?
C21 C20 H20 119.4 . . ?
C22 C21 C20 119.3(7) . . ?
C22 C21 H21 120.4 . . ?
C20 C21 H21 120.4 . . ?
O4 C22 C23 116.2(7) . . ?
O4 C22 C21 123.8(8) . . ?
C23 C22 C21 120.0(7) . . ?
C22 C23 C24 120.6(8) . . ?
C22 C23 H23 119.7 . . ?
C24 C23 H23 119.7 . . ?
C23 C24 C19 120.5(7) . . ?
C23 C24 H24 119.7 . . ?
C19 C24 H24 119.7 . . ?
O4 C25 H25A 109.5 . . ?
O4 C25 H25B 109.5 . . ?
H25A C25 H25B 109.5 . . ?
O4 C25 H25C 109.5 . . ?
H25A C25 H25C 109.5 . . ?
H25B C25 H25C 109.5 . . ?
O5 C26 H26A 109.5 . . ?
O5 C26 H26B 109.5 . . ?
H26A C26 H26B 109.5 . . ?
O5 C26 H26C 109.5 . . ?
H26A C26 H26C 109.5 . . ?
H26B C26 H26C 109.5 . . ?

loop_
_geom_torsion_atom_site_label_1
_geom_torsion_atom_site_label_2
_geom_torsion_atom_site_label_3
_geom_torsion_atom_site_label_4
_geom_torsion
_geom_torsion_site_symmetry_1
_geom_torsion_site_symmetry_2
_geom_torsion_site_symmetry_3
_geom_torsion_site_symmetry_4
_geom_torsion_publ_flag
C8 N1 N2 C10 -177.1(7) . . . . ?
C8 N1 N2 Er1 -0.5(8) . . . . ?
C16 N4 N5 C18 -172.6(6) . . . . ?
Er1 N4 N5 C18 -4.6(7) . . . . ?
C7 C2 C3 C4 -1.0(12) . . . . ?
C1 O3 C4 C3 3.8(13) . . . . ?
C1 O3 C4 C5 -178.6(8) . . . . ?
C2 C3 C4 O3 178.2(8) . . . . ?
C2 C3 C4 C5 0.7(13) . . . . ?
O3 C4 C5 C6 -178.5(8) . . . . ?
C3 C4 C5 C6 -0.8(14) . . . . ?
C4 C5 C6 C7 1.0(14) . . . . ?
C5 C6 C7 C2 -1.2(13) . . . . ?
C5 C6 C7 C8 178.0(8) . . . . ?
C3 C2 C7 C6 1.2(12) . . . . ?
C3 C2 C7 C8 -178.1(7) . . . . ?
Er1 O1 C8 N1 0.6(10) . . . . ?
Er1 O1 C8 C7 179.5(5) . . . . ?
N2 N1 C8 O1 0.0(10) . . . . ?
N2 N1 C8 C7 -179.0(6) . . . . ?
C6 C7 C8 O1 172.9(7) . . . . ?
C2 C7 C8 O1 -7.9(11) . . . . ?
C6 C7 C8 N1 -8.1(11) . . . . ?
C2 C7 C8 N1 171.2(7) . . . . ?
N1 N2 C10 C11 178.1(6) . . . . ?
Er1 N2 C10 C11 1.7(9) . . . . ?
N1 N2 C10 C9 1.8(11) . . . . ?
Er1 N2 C10 C9 -174.6(5) . . . . ?
C15 N3 C11 C12 0.5(11) . . . . ?
Er1 N3 C11 C12 -178.6(6) . . . . ?
C15 N3 C11 C10 -178.7(6) . . . . ?
Er1 N3 C11 C10 2.2(9) . . . . ?
N2 C10 C11 N3 -2.5(10) . . . . ?
C9 C10 C11 N3 173.8(7) . . . . ?
N2 C10 C11 C12 178.3(7) . . . . ?
C9 C10 C11 C12 -5.3(11) . . . . ?
N3 C11 C12 C13 -0.4(12) . . . . ?
C10 C11 C12 C13 178.7(7) . . . . ?
C11 C12 C13 C14 0.8(12) . . . . ?
C12 C13 C14 C15 -1.2(12) . . . . ?
C11 N3 C15 C14 -1.0(11) . . . . ?
Er1 N3 C15 C14 178.2(5) . . . . ?
C11 N3 C15 C16 176.9(6) . . . . ?
Er1 N3 C15 C16 -3.9(8) . . . . ?
C13 C14 C15 N3 1.3(11) . . . . ?
C13 C14 C15 C16 -176.5(7) . . . . ?
N5 N4 C16 C15 -177.0(6) . . . . ?
Er1 N4 C16 C15 15.6(8) . . . . ?
N5 N4 C16 C17 3.2(11) . . . . ?
Er1 N4 C16 C17 -164.2(6) . . . . ?
N3 C15 C16 N4 -7.4(9) . . . . ?
C14 C15 C16 N4 170.5(7) . . . . ?
N3 C15 C16 C17 172.5(7) . . . . ?
C14 C15 C16 C17 -9.6(11) . . . . ?
Er1 O2 C18 N5 5.6(11) . . . . ?
Er1 O2 C18 C19 -173.3(5) . . . . ?
N4 N5 C18 O2 -0.2(10) . . . . ?
N4 N5 C18 C19 178.7(6) . . . . ?
O2 C18 C19 C20 171.9(7) . . . . ?
N5 C18 C19 C20 -7.1(11) . . . . ?
O2 C18 C19 C24 -7.7(11) . . . . ?
N5 C18 C19 C24 173.3(7) . . . . ?
C24 C19 C20 C21 -1.2(11) . . . . ?
C18 C19 C20 C21 179.1(7) . . . . ?
C19 C20 C21 C22 0.2(12) . . . . ?
C25 O4 C22 C23 -172.0(8) . . . . ?
C25 O4 C22 C21 7.9(12) . . . . ?
C20 C21 C22 O4 -178.7(7) . . . . ?
C20 C21 C22 C23 1.2(12) . . . . ?
O4 C22 C23 C24 178.4(7) . . . . ?
C21 C22 C23 C24 -1.5(12) . . . . ?
C22 C23 C24 C19 0.4(12) . . . . ?
C20 C19 C24 C23 0.9(11) . . . . ?
C18 C19 C24 C23 -179.4(7) . . . . ?

loop_
_geom_hbond_atom_site_label_D
_geom_hbond_atom_site_label_H
_geom_hbond_atom_site_label_A
_geom_hbond_distance_DH
_geom_hbond_distance_HA
_geom_hbond_distance_DA
_geom_hbond_angle_DHA
_geom_hbond_site_symmetry_A
O5 H5 N5 0.89(10) 1.80(10) 2.688(8) 173(9) 3_666

_refine_diff_density_max         2.336
_refine_diff_density_min         -4.486
_refine_diff_density_rms         0.190

_shelx_res_file                  
;

    er2.res created by SHELXL-2014/7

TITL er2_a.res in P2(1)/c
REM Old TITL er2 in P2(1)/c
REM SHELXT solution in P2(1)/c
REM R1 0.124, Rweak 0.004, Alpha 0.081, Orientation as input
REM Formula found by SHELXT: C28 N9 O1 Er
CELL 0.7879 13.869 10.631 17.89 90 97.234 90
ZERR 4 0.003 0.002 0.004 0 0.003 0
LATT 1
SYMM -X,0.5+Y,0.5-Z
SFAC C H Er N O
DISP C 0.0046 0.0021 14.4496
DISP Er -0.3219 5.9117 27119.9784
DISP H -0 0 0.6281
DISP N 0.0084 0.0041 25.4502
DISP O 0.0146 0.0077 42.9339
UNIT 104 108 4 32 20
EQIV $1 1-X,1-Y,1-Z

L.S. 12
PLAN  12
SIZE 0.1 0.08 0.06
TEMP -173
HTAB O5 N5_$1
CONF
BOND $H
LIST 4
MORE 3
fmap 2
acta
SHEL 99 0.839
OMIT 2 0 0
OMIT 0 1 3
OMIT 2 0 2
OMIT -2 1 1
OMIT 0 4 6
OMIT -1 6 10
OMIT 2 1 1
OMIT -1 6 12
OMIT 2 2 0
OMIT 5 0 6
OMIT 2 3 3
OMIT 2 11 4

WGHT    0.073800   20.198601
EXTI    0.008788
FVAR       0.32975
ER1   3    0.741431    0.508641    0.545892    11.00000    0.02258    0.04085 =
         0.02132    0.00281    0.00465    0.00165
O1    5    0.845710    0.353939    0.586179    11.00000    0.02100    0.04614 =
         0.02489    0.00467    0.00452    0.00862
O2    5    0.635646    0.476475    0.631667    11.00000    0.02468    0.05229 =
         0.02908    0.00808    0.00726    0.00652
O3    5    1.179332   -0.056776    0.654153    11.00000    0.04274    0.05830 =
         0.04437    0.01731    0.01268    0.01753
O4    5    0.341377    0.452541    0.872511    11.00000    0.04056    0.05502 =
         0.02954    0.00686    0.01813   -0.00324
O5    5    0.661083    0.349419    0.474942    11.00000    0.02610    0.03817 =
         0.03034   -0.00202   -0.00260    0.00084
H5    2    0.600001    0.357422    0.453061    11.00000   -1.50000
N1    4    0.927029    0.372628    0.480213    11.00000    0.02371    0.03921 =
         0.02289    0.00488    0.00084    0.00319
N2    4    0.859759    0.466626    0.461576    11.00000    0.02305    0.04064 =
         0.02132   -0.00137    0.00085    0.00003
N3    4    0.722049    0.633729    0.430919    11.00000    0.02673    0.03841 =
         0.01917   -0.00138    0.00415   -0.00154
N4    4    0.592711    0.635274    0.525534    11.00000    0.01857    0.04246 =
         0.01993    0.00026    0.00164   -0.00228
N5    4    0.527948    0.628948    0.579164    11.00000    0.02287    0.03698 =
         0.02121    0.00074    0.00783    0.00102
N6    4    0.820050    0.660942    0.614500    11.00000    0.03413    0.04867 =
         0.02750   -0.00208    0.00585    0.00270
N7    4    0.877357    0.732001    0.646175    11.00000    0.03010    0.04444 =
         0.02355   -0.00156    0.00680    0.00120
N8    4    0.932318    0.801472    0.677190    11.00000    0.04168    0.04754 =
         0.03655   -0.00210    0.01026   -0.00491
C1    1    1.176640   -0.106209    0.727731    11.00000    0.03988    0.06180 =
         0.04367    0.02346    0.00471    0.01138
AFIX 137
H1A   2    1.111365   -0.138482    0.731981    11.00000   -1.50000
H1B   2    1.192711   -0.039551    0.765063    11.00000   -1.50000
H1C   2    1.223990   -0.174658    0.736851    11.00000   -1.50000
AFIX   0
C2    1    0.979152    0.172870    0.646719    11.00000    0.02557    0.04455 =
         0.02560    0.00571    0.00690    0.00030
AFIX  43
H2    2    0.933088    0.204813    0.676929    11.00000   -1.20000
AFIX   0
C3    1    1.043687    0.080541    0.675662    11.00000    0.03213    0.04036 =
         0.02394    0.00750    0.00345   -0.00031
AFIX  43
H3    2    1.042549    0.050368    0.725526    11.00000   -1.20000
AFIX   0
C4    1    1.109966    0.032501    0.631276    11.00000    0.03111    0.04547 =
         0.03111    0.00631    0.00422    0.00263
C5    1    1.112018    0.078263    0.558300    11.00000    0.04359    0.05807 =
         0.03105    0.01040    0.01568    0.01579
AFIX  43
H5A   2    1.157948    0.046125    0.528036    11.00000   -1.20000
AFIX   0
C6    1    1.047210    0.170184    0.530327    11.00000    0.03820    0.05554 =
         0.02371    0.00221    0.00698    0.00917
AFIX  43
H6    2    1.048174    0.200035    0.480375    11.00000   -1.20000
AFIX   0
C7    1    0.980420    0.219882    0.574149    11.00000    0.02066    0.03729 =
         0.02535    0.00246    0.00106    0.00138
C8    1    0.912719    0.321345    0.545471    11.00000    0.02370    0.03889 =
         0.02826   -0.00139    0.00514   -0.00214
C9    1    0.930120    0.487198    0.343010    11.00000    0.02895    0.04558 =
         0.02012    0.00230    0.00701    0.00508
AFIX 137
H9A   2    0.992202    0.460243    0.370625    11.00000   -1.50000
H9B   2    0.940829    0.560221    0.311653    11.00000   -1.50000
H9C   2    0.902283    0.418282    0.310877    11.00000   -1.50000
AFIX   0
C10   1    0.860958    0.522349    0.398205    11.00000    0.02650    0.03799 =
         0.02069   -0.00255    0.00689   -0.00040
C11   1    0.784839    0.619917    0.379928    11.00000    0.02306    0.04146 =
         0.02179    0.00377    0.00461   -0.00235
C12   1    0.777382    0.691487    0.314438    11.00000    0.02387    0.05071 =
         0.02641    0.00082    0.00758    0.00009
AFIX  43
H12   2    0.822552    0.681034    0.279168    11.00000   -1.20000
AFIX   0
C13   1    0.702734    0.778336    0.301689    11.00000    0.03021    0.04857 =
         0.02274    0.00701    0.00425   -0.00108
AFIX  43
H13   2    0.695708    0.827506    0.256993    11.00000   -1.20000
AFIX   0
C14   1    0.638537    0.793351    0.354039    11.00000    0.02837    0.03952 =
         0.02553    0.00365    0.00357   -0.00128
AFIX  43
H14   2    0.587755    0.853743    0.346503    11.00000   -1.20000
AFIX   0
C15   1    0.650018    0.717618    0.418374    11.00000    0.02159    0.03966 =
         0.01921   -0.00067    0.00424   -0.00386
C16   1    0.580496    0.722961    0.475255    11.00000    0.02206    0.03757 =
         0.02017   -0.00400    0.00346   -0.00169
C17   1    0.505522    0.824201    0.470647    11.00000    0.03602    0.04406 =
         0.02804    0.00563    0.01290    0.00646
AFIX 137
H17A  2    0.448353    0.798054    0.436321    11.00000   -1.50000
H17B  2    0.532264    0.901588    0.451740    11.00000   -1.50000
H17C  2    0.486688    0.839479    0.520852    11.00000   -1.50000
AFIX   0
C18   1    0.559304    0.542078    0.631656    11.00000    0.02322    0.04075 =
         0.02020   -0.00187    0.00539   -0.00055
C19   1    0.499396    0.524462    0.695161    11.00000    0.02448    0.03516 =
         0.02059    0.00035    0.00474   -0.00437
C20   1    0.421650    0.601304    0.705752    11.00000    0.02982    0.04053 =
         0.02083   -0.00016    0.00097   -0.00289
AFIX  43
H20   2    0.405211    0.669297    0.672092    11.00000   -1.20000
AFIX   0
C21   1    0.367095    0.580694    0.764891    11.00000    0.02552    0.04781 =
         0.02891   -0.00435    0.00391    0.00016
AFIX  43
H21   2    0.313822    0.633972    0.771477    11.00000   -1.20000
AFIX   0
C22   1    0.391265    0.482227    0.813688    11.00000    0.03041    0.05399 =
         0.01935   -0.00100    0.00671   -0.00720
C23   1    0.469461    0.407130    0.804583    11.00000    0.03527    0.04442 =
         0.02357    0.00277    0.00648   -0.00494
AFIX  43
H23   2    0.486793    0.340563    0.839099    11.00000   -1.20000
AFIX   0
C24   1    0.523124    0.427384    0.745798    11.00000    0.02739    0.03853 =
         0.02630    0.00283    0.00565    0.00205
AFIX  43
H24   2    0.576792    0.374317    0.739997    11.00000   -1.20000
AFIX   0
C25   1    0.252332    0.518245    0.877713    11.00000    0.03711    0.07394 =
         0.03869    0.00577    0.01964   -0.00167
AFIX 137
H25A  2    0.212427    0.517832    0.828443    11.00000   -1.50000
H25B  2    0.266690    0.605271    0.893411    11.00000   -1.50000
H25C  2    0.216940    0.476595    0.914845    11.00000   -1.50000
AFIX   0
C26   1    0.706803    0.236653    0.442393    11.00000    0.04533    0.05285 =
         0.05115   -0.00819    0.00248    0.00501
AFIX 137
H26A  2    0.656267    0.186535    0.412898    11.00000   -1.50000
H26B  2    0.739669    0.185221    0.483387    11.00000   -1.50000
H26C  2    0.754202    0.264874    0.409728    11.00000   -1.50000
AFIX   0
HKLF 4

REM  er2_a.res in P2(1)/c
REM R1 =  0.0537 for    3912 Fo > 4sig(Fo)  and  0.0629 for all    4628 data
REM    370 parameters refined using      0 restraints

END

WGHT      0.0738     20.2084

REM Highest difference peak  2.336,  deepest hole -4.486,  1-sigma level  0.190
Q1    1   0.8016  0.4927  0.5454  11.00000  0.05    2.34
Q2    1   0.6751  0.4949  0.5421  11.00000  0.05    2.30
Q3    1   0.7493  0.5730  0.5734  11.00000  0.05    2.10
Q4    1   0.7881  0.4168  0.5841  11.00000  0.05    1.72
Q5    1   0.6898  0.4256  0.5096  11.00000  0.05    1.55
Q6    1   0.7073  0.5770  0.5111  11.00000  0.05    1.40
Q7    1   0.7678  0.2255  0.4061  11.00000  0.05    1.27
Q8    1   0.7592  0.5040  0.3718  11.00000  0.05    0.80
Q9    1   0.7903  0.5001  0.3502  11.00000  0.05    0.66
Q10   1   0.8096  0.3453  0.6225  11.00000  0.05    0.62
Q11   1   0.7023  0.3419  0.4708  11.00000  0.05    0.59
Q12   1   0.6720  0.6731  0.4688  11.00000  0.05    0.57
;
_shelx_res_checksum              87066

_shelx_hkl_file                  
;
   0   0   1    3.14    1.94
   0   0  -1   -2.94    1.89
   0   0   3   -5.18    6.03
   0   0   3    8.17    5.68
   0   0  -3    4.09    6.03
   0   0   4   17.04    6.48
   0   0   4   20.92    7.12
   0   0  -4   20.08    7.17
   0   0   5   -3.29    7.22
   0   0   5   12.55    7.42
   0   0  -5   -0.65    7.82
   0   0   6   34.72    7.87
   0   0   6   40.06    8.07
   0   0  -6   35.52    8.32
   0   0   7   -2.24    6.53
   0   0   7    1.59    7.37
   0   0  -7    9.07    7.82
   0   0   8 1754.68   74.78
   0   0   8 1688.92   71.94
   0   0  -8 1736.75   74.28
   0   0   9   -1.89    8.17
   0   0   9    3.19    7.52
   0   0  -9    3.69    8.07
   0   0  10 4023.02  168.49
   0   0  10 4194.90  175.52
   0   0 -10 3838.68  161.02
   0   0  11   -1.84    7.82
   0   0  11    6.93    7.97
   0   0 -11  -10.11    8.62
   0   0  12 2793.44  117.63
   0   0  12 2790.95  117.83
   0   0 -12 2760.06  116.83
   0   0  13    5.23    8.37
   0   0  13   -7.47    9.17
   0   0 -13   -1.30    9.17
   0   0  14  799.12   37.32
   0   0  14  813.57   37.17
   0   0  15    7.82    9.42
   0   0  15    4.48    9.32
   0   0  16    2.69    8.47
   0   0  16   -2.84    9.42
   0   0  17   -3.79   10.56
   0   0  17   16.19   11.91
   0   0  18   31.39   10.26
   0   0  18   22.77   10.46
   0   0  19   -4.58   11.31
   0   0  19  -23.71   11.21
   0   0  20  237.00   16.14
   0   0  20  229.03   16.24
   0   0  21   16.34   11.46
   0   0  21   13.40   11.81
   0   0  22  346.10   21.82
   0   0  22  339.68   21.77
   0  -1  -2  194.05   10.51
   0  -1  -2  181.20    9.96
   0   1   2  183.19    9.91
   0   1   2  185.38   10.31
   0  -1   3 5898.76  244.37
   0  -1  -3 6257.47  259.27
   0  -1  -3 6496.61  269.13
   0   1   3 6277.40  260.31
   0   1   3 6332.20  262.60
   0  -1   4  188.07   11.16
   0  -1  -4  203.07   12.55
   0  -1   5   24.16    5.78
   0  -1   5   12.80    7.07
   0  -1  -5   12.60    8.22
   0   1   5   22.57    7.82
   0   1   5   22.87    7.47
   0   1  -5   22.07    6.93
   0  -1   6    2.99    6.53
   0  -1   6   -1.05    6.38
   0  -1  -6   -3.54    8.42
   0   1   6   -5.68    7.12
   0   1   6    2.44    7.67
   0   1  -6   11.21    6.63
   0  -1   7 1129.93   48.97
   0  -1  -7 1261.46   55.00
   0   1   7 1155.34   50.47
   0   1   7 1149.36   50.27
   0   1  -7 1111.00   48.18
   0  -1   8  109.21    9.02
   0  -1   8  114.39    9.76
   0  -1  -8  105.12   10.41
   0   1   8  108.66   11.06
   0   1   8   99.29   10.76
   0   1  -8  105.62    9.17
   0  -1   9 1659.03   70.99
   0  -1   9 1581.31   67.76
   0   1   9 1771.62   75.58
   0   1   9 1830.91   78.47
   0  -1  10   98.30    9.32
   0  -1  10  128.69   10.31
   0  -1 -10   94.91   11.16
   0   1  10  119.47   10.76
   0   1  10   94.01    9.47
   0   1 -10  109.71   10.46
   0  -1  11 2059.58   87.44
   0  -1  11 2163.21   91.97
   0  -1 -11 2296.73   97.95
   0   1  11 2072.04   88.73
   0   1  11 2206.56   94.16
   0   1 -11 2090.97   89.03
   0  -1  12   14.05    8.82
   0  -1  12   29.15    8.22
   0  -1 -12   24.66    9.81
   0   1  12   17.19    8.92
   0   1  12   36.67    9.47
   0   1 -12   21.92    9.42
   0  -1  13 1498.11   64.67
   0  -1  13 1508.57   65.17
   0  -1 -13 1451.77   63.57
   0   1  13 1684.44   72.64
   0   1  13 1510.56   65.17
   0   1 -13 1601.23   69.35
   0  -1  14   -2.59    9.17
   0  -1  14   11.31    9.67
   0   1  14   10.21    9.96
   0   1  14   11.61    8.17
   0   1 -14    4.28    9.12
   0  -1  15  231.02   14.35
   0  -1  15  236.90   15.79
   0   1  15  231.77   14.85
   0   1  15  228.23   15.15
   0  -1  16    9.37    8.62
   0  -1  16   19.53    9.62
   0   1  16   10.81   10.26
   0   1  16   30.89   10.96
   0  -1  17   15.89    9.17
   0  -1  17    5.68    9.32
   0   1  17    6.28   10.31
   0   1  17   -9.02    9.52
   0  -1  18   -1.15   10.86
   0  -1  18   -8.17   10.66
   0   1  18   12.50   11.26
   0   1  18   -1.99   10.06
   0  -1  19  444.25   24.31
   0  -1  19  400.76   21.47
   0   1  19  344.66   20.48
   0   1  19  351.53   20.28
   0  -1  20   37.56   11.61
   0  -1  20   38.11   12.21
   0   1  20   21.27   10.76
   0   1  20    2.74   11.01
   0  -1  21  426.51   23.61
   0  -1  21  384.32   22.47
   0   1  21  389.80   22.32
   0   1  21  355.17   20.03
   0  -1  22   -4.68   14.45
   0  -1  22  -11.76   14.10
   0   1  22  -12.11   14.15
   0   1  22    3.84   12.31
   0   2   0 6287.36  260.51
   0  -2   1   14.90    4.33
   0  -2  -1   18.58    6.43
   0   2   1   30.04    6.78
   0   2   1   28.80    6.48
   0   2  -1   35.82    5.23
   0  -2   2  803.11   33.88
   0  -2  -2  801.61   35.17
   0  -2  -2  797.13   35.02
   0   2   2  818.05   35.77
   0   2   2  825.53   36.17
   0   2  -2  878.34   37.02
   0  -2   3  562.97   24.16
   0  -2  -3  551.02   25.41
   0  -2  -3  553.51   26.01
   0   2   3  596.35   27.35
   0   2   3  563.47   26.11
   0   2  -3  534.08   23.02
   0  -2   4   74.23    5.63
   0  -2  -4   67.06    8.62
   0  -2  -4   72.04    8.17
   0   2   4   78.82    8.77
   0   2   4   65.91    8.27
   0   2  -4   56.60    5.63
   0  -2   5  359.01   16.54
   0  -2  -5  404.39   20.08
   0   2   5  431.45   21.32
   0   2   5  405.94   20.08
   0  -2   6   68.85    7.07
   0  -2  -6   68.01    8.97
   0   2   6   86.59    9.81
   0   2   6   65.86    9.07
   0   2  -6   61.58    7.22
   0  -2   7  949.58   41.40
   0  -2  -7 1046.73   46.23
   0   2   7 1102.53   48.53
   0   2   7 1078.62   47.58
   0  -2   8  415.01   20.08
   0  -2  -8  452.17   22.57
   0   2   8  482.96   23.76
   0   2   8  477.98   23.91
   0  -2   9  598.84   27.45
   0  -2   9  681.55   30.44
   0  -2  -9  635.71   30.19
   0   2   9  663.11   31.59
   0   2   9  614.79   29.34
   0   2  -9  561.48   26.36
   0  -2  10 2561.78  108.01
   0  -2  10 2799.42  117.93
   0  -2 -10 2843.76  120.32
   0   2  10 2771.02  116.98
   0   2 -10 2529.89  106.82
   0  -2  11  140.59   10.51
   0  -2  11  169.04   12.16
   0  -2 -11  170.14   12.70
   0   2  11  155.94   12.90
   0   2  11  158.08   12.16
   0   2 -11  165.70   11.71
   0  -2  12 2603.63  109.80
   0  -2  12 2775.51  117.13
   0  -2 -12 2736.65  116.18
   0   2  12 2795.44  118.62
   0   2  12 2908.53  123.21
   0   2 -12 2591.67  109.71
   0  -2  13   -2.04    7.17
   0  -2  13   12.11    8.02
   0   2  13    1.49   10.16
   0   2  13    1.39    9.17
   0   2 -13    7.67    8.62
   0  -2  14  841.47   38.46
   0  -2  14  827.02   37.66
   0   2  14  862.89   40.11
   0   2  14  873.36   40.40
   0  -2  15   20.43    9.22
   0  -2  15   15.89    8.92
   0   2  15    9.07    8.57
   0   2  15   21.32   10.21
   0  -2  16   23.57    9.07
   0  -2  16   38.96   10.01
   0   2  16   40.11   10.56
   0   2  16   41.40    9.96
   0  -2  17   -0.80    9.57
   0  -2  17   15.49   10.26
   0   2  17    5.88    9.32
   0   2  17   20.38   11.61
   0  -2  18  316.96   18.73
   0  -2  18  351.38   19.73
   0   2  18  295.19   18.83
   0   2  18  316.76   19.53
   0  -2  19    8.57   10.61
   0  -2  19   10.11   10.26
   0   2  19    6.43   10.31
   0   2  19   12.31   11.96
   0  -2  20  512.65   26.36
   0  -2  20  479.27   25.01
   0   2  20  467.02   24.61
   0   2  20  464.68   24.86
   0  -2  21   11.76   14.35
   0  -2  21   -2.34   12.60
   0   2  21   -4.33    9.86
   0   2  21  -13.30   11.21
   0  -2  22  463.43   25.71
   0  -2  22  510.66   27.75
   0   2  22  429.01   23.07
   0   2  22  493.37   26.40
   0  -3   1 1797.53   75.28
   0  -3  -1 1771.62   74.93
   0   3   1 1986.35   83.85
   0   3   1 1748.70   74.03
   0   3  -1 1760.16   73.83
   0   3  -1 1946.49   81.61
   0  -3   2  343.31   15.49
   0  -3  -2  350.04   17.64
   0   3   2  390.89   19.48
   0   3   2  412.27   20.38
   0   3  -2  404.59   18.13
   0  -3   3  849.94   36.02
   0  -3  -3  918.69   40.50
   0   3   3  871.86   38.71
   0   3   3  839.48   37.17
   0   3  -3  885.81   37.51
   0  -3   4   25.81    3.69
   0  -3  -4   18.53    8.22
   0  -3  -4   20.73    7.87
   0   3   4   21.82    8.57
   0   3   4   36.57    9.22
   0   3  -4   19.48    3.64
   0  -3   5  575.93   24.91
   0  -3  -5  601.33   28.15
   0   3   5  606.32   28.55
   0   3   5  656.64   30.64
   0  -3   6 1056.70   44.89
   0  -3  -6 1085.09   47.98
   0   3   6 1178.26   51.61
   0   3   6 1108.51   48.82
   0  -3   7  367.48   16.89
   0  -3   7  345.06   16.19
   0  -3  -7  404.39   21.17
   0   3   7  443.70   22.62
   0   3   7  445.40   22.82
   0  -3   8  241.78   12.46
   0  -3  -8  277.15   16.74
   0   3   8  271.87   15.79
   0   3   8  259.81   16.09
   0   3  -8  225.49   12.31
   0  -3   9 2596.65  108.81
   0  -3   9 2471.10  103.68
   0   3   9 3154.14  133.12
   0   3   9 3088.88  130.13
   0  -3  10   59.88    6.83
   0  -3  10   54.25    7.67
   0  -3 -10   41.20    9.67
   0   3  10   88.43   10.51
   0   3  10   66.61   10.06
   0   3 -10   68.30    8.22
   0   3  11 3493.92  147.37
   0   3  11 3747.51  157.83
   0  -3  12   43.09    7.87
   0  -3  12   41.10    7.42
   0   3  12   48.03   10.66
   0   3  12   47.13    9.37
   0   3 -12   23.81    8.52
   0  -3  13 1143.88   50.02
   0  -3  13 1012.36   45.19
   0   3  13 1162.32   51.46
   0   3  13 1378.04   60.98
   0  -3  14   35.27    8.32
   0  -3  14   43.99    8.42
   0   3  14   19.93   10.56
   0   3  14   19.48   10.31
   0  -3  15  279.84   15.94
   0  -3  15  277.70   16.09
   0   3  15  317.11   19.88
   0   3  15  332.60   19.98
   0  -3  16   57.74    9.17
   0  -3  16   47.43   11.36
   0   3  16   75.78   13.30
   0   3  16   73.39   13.45
   0  -3  17   35.07   10.36
   0  -3  17   12.41    8.82
   0   3  17   12.21   11.76
   0   3  17   -1.15   11.66
   0  -3  18   46.03    9.81
   0  -3  18   72.64   11.36
   0   3  18   73.29   12.21
   0   3  18   39.91   10.76
   0  -3  19  494.67   25.31
   0  -3  19  554.50   27.45
   0  -3  20    9.96   11.71
   0  -3  20   -7.57   13.15
   0   3  20   13.95   11.51
   0   3  20   22.77   10.46
   0  -3  21  688.52   34.23
   0  -3  21  676.07   33.28
   0   3  21  613.79   29.89
   0   3  21  603.33   30.49
   0  -3  22  -14.10   14.65
   0  -3  22  -13.60   16.34
   0   3  22   -1.35   11.91
   0   3  22  -10.41   10.06
   0  -4   0 2971.80  124.20
   0   4   0 3185.53  133.12
   0   4   0 2907.03  121.71
   0  -4   1    7.67    5.53
   0  -4  -1   -6.43    6.78
   0   4   1   15.59    7.62
   0   4   1   10.46    7.42
   0   4  -1   -2.54    5.78
   0   4  -1   17.24    6.93
   0  -4   2 1294.34   54.75
   0  -4  -2 1300.32   55.90
   0   4   2 1268.93   54.90
   0   4   2 1437.33   61.68
   0   4  -2 1309.78   55.30
   0   4  -2 1447.29   61.13
   0  -4   3  112.49    6.97
   0  -4  -3   82.45    8.32
   0   4   3  118.57   11.06
   0   4   3   99.64    9.17
   0   4  -3  106.52    6.83
   0   4   4   79.21   10.01
   0   4   4   78.97   10.01
   0  -4   5  779.19   33.23
   0   4   5  888.80   39.96
   0   4   5  814.07   36.97
   0   4  -5  785.17   33.53
   0  -4   6  296.13   13.40
   0   4   6   62.62    9.81
   0   4   6   47.13    8.82
   0  -4   7  477.68   20.78
   0  -4   7  535.07   23.37
   0   4   7  539.06   26.06
   0   4   7  582.90   28.25
   0  -4   8 1223.59   51.91
   0  -4   8 1314.77   55.65
   0   4   8 1499.10   65.02
   0   4   8 1440.81   62.87
   0  -4   9  163.76    9.62
   0  -4   9  162.42    8.92
   0   4   9  190.81   14.25
   0   4   9  177.91   13.95
   0   4  -9  167.10   10.01
   0  -4  10 2616.08  109.61
   0  -4  10 2461.14  102.83
   0   4  10 2962.83  125.65
   0   4  10 3110.80  131.38
   0  -4  11   21.07    6.53
   0  -4  11   25.01    5.88
   0   4  11   29.54    9.86
   0   4  11   29.10    9.27
   0  -4  12 1907.13   80.71
   0  -4  12 1978.88   83.45
   0   4  12 2647.47  112.79
   0   4  12 2474.59  105.82
   0   4  13   72.39   11.86
   0   4  13   62.33   12.41
   0  -4  14  618.77   28.35
   0  -4  14  548.03   25.86
   0   4  14  595.85   29.84
   0   4  14  542.55   27.50
   0  -4  15  201.87   12.60
   0  -4  15  213.68   14.55
   0   4  15  238.34   15.84
   0   4  15  225.59   16.39
   0   4  16   -1.44    9.81
   0   4  16    5.98   11.86
   0  -4  17   77.22   11.01
   0  -4  17   99.44   10.11
   0   4  17   91.22   13.50
   0   4  17   70.84   11.36
   0  -4  18  171.38   13.40
   0  -4  18  145.03   14.15
   0   4  18  149.96   13.75
   0   4  18  156.29   15.20
   0  -4  19  -16.84   12.70
   0  -4  19   -5.03   10.16
   0   4  19    0.95   12.21
   0   4  19  -41.30   13.40
   0  -4  20  583.90   29.10
   0  -4  20  556.99   29.44
   0  -4  21   13.65   14.35
   0  -4  21   19.98   16.99
   0   4  21   22.52   12.90
   0   4  21   41.75   13.15
   0   4  22  374.70   24.06
   0  -5   1 1896.67   80.11
   0  -5  -1 1935.03   82.15
   0   5   1 1867.78   79.31
   0   5   1 1954.96   82.85
   0   5  -1 1939.02   81.71
   0   5  -1 2117.38   89.28
   0  -5   2  312.13   15.25
   0  -5  -2  289.71   16.14
   0   5   2  334.10   17.64
   0   5   2  356.52   18.68
   0   5  -2  323.63   16.24
   0   5  -2  319.05   15.39
   0  -5   3  863.89   37.07
   0  -5  -3  835.49   37.61
   0   5   3  864.89   38.86
   0   5   3  898.76   40.26
   0   5  -3  885.81   38.01
   0   5  -3  848.45   36.37
   0  -5   4   67.46    5.48
   0   5   4   71.24    9.81
   0   5   4   75.13    9.91
   0   5  -4   77.17    5.58
   0   5  -4   72.09    5.18
   0  -5   5   58.04    3.59
   0   5   5   81.26   10.31
   0   5   5   80.61   10.61
   0   5  -5   61.03    3.94
   0   5  -5   59.09    3.79
   0   5   6   85.14   10.76
   0   5   6  115.83   11.41
   0   5   7  573.93   28.30
   0   5   7  566.46   27.90
   0   5   8  315.41   18.73
   0   5   8  302.51   17.54
   0  -5   9 1535.47   65.07
   0  -5   9 1408.43   59.64
   0   5   9 1853.33   80.31
   0   5   9 1827.42   78.57
   0  -5  10   29.54    4.33
   0  -5  10   25.56    4.93
   0   5  10   36.42   10.86
   0   5  10   35.82   11.11
   0  -5  11 1837.88   77.47
   0  -5  11 2027.70   85.14
   0   5  11 2557.29  109.41
   0   5  11 2342.07  100.09
   0   5  12  198.63   16.09
   0   5  12  225.94   16.79
   0  -5  13 1076.62   46.28
   0  -5  13 1082.60   46.58
   0   5  13 1085.09   48.43
   0   5  13 1088.08   49.17
   0  -5  14  222.90   13.55
   0  -5  14  261.26   13.90
   0   5  14  239.99   15.84
   0   5  14  252.29   18.04
   0  -5  15  366.23   18.48
   0  -5  15  417.00   20.78
   0   5  15  356.47   21.12
   0   5  15  410.07   23.42
   0  -5  16   88.78   11.26
   0  -5  16  102.03    9.96
   0   5  16   72.39   12.41
   0   5  16   65.17   13.65
   0   5  17   40.30   12.31
   0   5  17   47.53   13.10
   0  -5  18  130.48   14.15
   0  -5  18  131.88   12.70
   0   5  18  137.21   14.85
   0   5  18  148.22   15.10
   0  -5  19  327.27   19.93
   0  -5  19  352.83   22.62
   0   5  19  338.93   19.78
   0   5  19  381.78   21.67
   0  -5  20   12.36   18.13
   0  -5  20   18.33   14.45
   0   5  20   30.29   13.45
   0   5  20   28.85   11.96
   0  -5  21  557.49   34.03
   0  -5  21  537.07   31.49
   0   5  21  610.80   31.34
   0   5  21  567.46   28.15
   0  -6   0 3285.17  137.85
   0   6   0 3450.08  144.38
   0   6   0 3755.48  157.28
   0  -6   1   26.31    6.68
   0  -6  -1   43.19    8.02
   0   6   1   39.46    7.97
   0   6   1   29.49    8.27
   0   6  -1   28.70    7.52
   0   6  -1   33.78    7.52
   0  -6   2 2818.35  117.93
   0   6   2 3110.80  130.83
   0   6   2 2868.67  120.82
   0   6  -2 3029.09  126.79
   0   6  -2 2910.02  121.66
   0  -6   3  133.47    8.52
   0   6   3  124.05   10.86
   0   6   3  161.47   12.80
   0   6  -3  147.32    8.87
   0   6  -3  163.31    9.57
   0   6   4  129.14   11.36
   0   6   4  121.66   11.11
   0   6  -4  137.26    7.82
   0   6  -4  121.81    7.37
   0   6   5  115.83   11.36
   0   6   5  141.79   12.46
   0   6  -5  123.60    6.33
   0   6  -5  128.84    6.53
   0   6   6    3.09    9.62
   0   6   6    6.23    9.52
   0   6   7   54.70   10.76
   0   6   7   87.68   11.66
   0   6   8  619.27   30.39
   0   6   8  631.73   30.44
   0   6   9   23.27    9.96
   0   6   9    2.54   10.56
   0   6  10 1441.31   63.87
   0   6  10 1468.71   64.72
   0   6  11   47.68   11.96
   0   6  11   42.90   12.06
   0   6  12 1709.35   73.98
   0   6  12 1722.30   74.68
   0   6  13  452.12   24.71
   0   6  13  434.59   23.71
   0   6  14  741.33   35.27
   0   6  14  768.23   36.12
   0   6  15  103.08   13.85
   0   6  15   98.64   14.10
   0   6  16   70.50   12.41
   0   6  16   86.39   13.75
   0   6  17  115.93   14.25
   0   6  17   95.41   14.65
   0  -6  18   37.47    6.97
   0  -6  18   39.71    8.17
   0   6  18   49.72   13.65
   0   6  18   50.77   13.80
   0  -6  19   18.68    8.77
   0  -6  19   33.43    7.62
   0   6  19   28.90   11.51
   0   6  19   32.63   11.96
   0   6  20  163.31   15.39
   0   6  20  200.58   17.59
   0   7   1 3767.44  157.88
   0   7   1 3585.59  150.46
   0   7  -1 3761.46  157.38
   0   7  -1 3715.12  155.49
   0   7   2   46.23    9.17
   0   7   2   58.39    9.72
   0   7  -2   59.64    7.82
   0   7  -2   61.03    7.97
   0   7   3  459.50   23.32
   0   7   3  463.28   23.02
   0   7  -3  441.81   20.73
   0   7  -3  491.78   22.67
   0   7   4  118.27   11.56
   0   7   4  120.42   11.51
   0   7  -4  124.00    7.97
   0   7  -4  108.41    7.57
   0   7   5   17.64    9.17
   0   7   5   12.85    9.42
   0   7   6  127.99   11.61
   0   7   6  144.53   12.70
   0   7   7  305.80   18.33
   0   7   7  306.65   18.38
   0   7   8   86.19   11.86
   0   7   8   93.16   13.00
   0   7   9 1227.08   54.85
   0   7   9 1245.02   55.60
   0   7  10  -11.96   11.11
   0   7  10  -13.40   10.21
   0   7  11 1138.40   51.02
   0   7  11 1131.92   51.12
   0   7  12   21.62   12.26
   0   7  12    1.39   12.21
   0   7  13  610.30   30.24
   0   7  13  625.25   30.79
   0   7  14  110.30   13.95
   0   7  14   82.40   13.15
   0   7  15  106.87   12.21
   0   7  15  118.32   13.35
   0   7  16  176.17   15.15
   0   7  16  185.03   16.79
   0   7  17    9.52   12.55
   0   7  17   35.87   11.86
   0   7  18   21.12   12.55
   0   7  18    7.02   13.00
   0   7  19  160.62   15.99
   0   7  19  156.24   15.20
   0   8   0 1115.98   49.32
   0   8   0 1195.70   52.06
   0   8   1   11.51    8.97
   0   8   1   17.84    8.17
   0   8  -1    9.96    8.17
   0   8  -1    6.23    8.02
   0   8   2 1287.36   56.45
   0   8  -2 1138.40   49.27
   0   8  -2 1256.48   54.45
   0   8  -3  148.91    9.81
   0   8  -3  141.64   10.21
   0   8   4  182.44   15.15
   0   8   4  180.90   14.80
   0   8   5  448.19   23.61
   0   8   5  412.17   22.82
   0   8  -5  380.93   17.29
   0   8  -5  438.32   19.38
   0   8   6   99.04   12.75
   0   8   6   96.40   12.95
   0   8   7  362.00   21.12
   0   8   7  390.49   22.12
   0   8   8  437.92   23.17
   0   8   8  466.37   24.66
   0   8   9  288.11   18.33
   0   8   9  251.64   17.84
   0   8  10  405.19   22.57
   0   8  10  460.84   25.06
   0   8  11   56.05   12.95
   0   8  11   49.82   12.95
   0   8  12  760.76   36.47
   0   8  12  709.45   34.58
   0   8  13    3.99   12.06
   0   8  13   19.53   11.06
   0   8  14  131.18   12.95
   0   8  14  167.75   15.94
   0   8  15   85.74   13.60
   0   8  15   62.23   13.35
   0   8  16   13.35   12.11
   0   8  16   19.93   11.56
   0   8  17   62.57   11.86
   0   8  17   56.05   14.00
   0   8  18   44.14   13.85
   0   8  18   67.76   12.36
   0   9   1 1050.22   47.13
   0   9   1 1022.32   45.98
   0   9  -1 1137.90   50.42
   0   9  -1 1055.70   46.78
   0   9   2  119.22   13.10
   0   9   2  140.05   13.75
   0   9  -2  143.58   11.81
   0   9  -2  163.21   13.25
   0   9   3  325.78   19.98
   0   9   3  310.13   19.68
   0   9  -3  346.50   17.59
   0   9   4  220.11   16.39
   0   9   4  198.78   15.69
   0   9  -4  183.84   11.01
   0   9  -4  204.46   12.60
   0   9   5    1.74   10.56
   0   9   5   16.54   11.16
   0   9   6  575.43   28.95
   0   9   6  564.97   28.90
   0   9   7   26.80   12.36
   0   9   7   16.59   11.61
   0   9   8  329.12   20.18
   0   9   8  326.28   20.03
   0   9   9  495.32   25.51
   0   9   9  459.25   24.51
   0   9  10   38.46   12.16
   0   9  10   17.34   11.31
   0   9  11  567.46   28.90
   0   9  11  606.82   30.24
   0   9  12    1.44   12.16
   0   9  12    5.33   12.60
   0   9  13  222.55   17.29
   0   9  13  200.03   17.19
   0   9  14   29.99   13.50
   0   9  14    0.10   13.45
   0   9  15   98.05   14.70
   0   9  15   95.81   13.80
   0   9  16   58.19   14.90
   0   9  16   88.33   15.15
   0   9  17   17.29   13.40
   0   9  17   -3.44   13.60
   0  10   0  428.71   23.86
   0  10   0  490.63   25.26
   0  10   1   49.47   11.96
   0  10   1   26.75   12.31
   0  10  -1   25.56   11.46
   0  10  -1   15.34   10.91
   0  10   2  109.46   13.30
   0  10   2  130.73   13.20
   0  10  -2  115.14   11.81
   0  10  -2  115.58   11.91
   0  10   3   19.83   10.91
   0  10   3   38.91   11.26
   0  10  -3   50.42    8.97
   0  10  -3   65.41   10.31
   0  10   4   98.60   12.70
   0  10   4   95.56   12.95
   0  10   5  121.91   13.75
   0  10   5   89.93   12.36
   0  10   6   10.41   12.36
   0  10   6    1.39   11.26
   0  10   7  160.62   14.85
   0  10   7  148.32   14.20
   0  10   8  281.74   18.88
   0  10   8  357.56   21.37
   0  10   9   55.40   13.25
   0  10   9   36.92   13.25
   0  10  10  243.47   16.99
   0  10  10  210.04   16.59
   0  10  11    2.29   13.20
   0  10  11  -16.84   12.55
   0  10  12  310.38   20.43
   0  10  12  265.20   18.58
   0  10  13   28.65   13.80
   0  10  13   19.43   13.05
   0  10  14  121.31   16.29
   0  10  14  109.66   16.04
   0  10  15    8.22   12.80
   0  10  15   30.04   14.25
   0  11   1   95.26   14.60
   0  11   1  100.19   13.30
   0  11  -1  127.24   14.40
   0  11  -1   88.98   14.65
   0  11   2    4.93   11.11
   0  11   2   12.11   12.75
   0  11  -2   21.22   11.91
   0  11  -2   12.75   11.16
   0  11   3   59.73   13.35
   0  11   3   77.77   13.55
   0  11  -3   86.24   10.96
   0  11  -3   80.26   12.55
   0  11   4   -4.14   12.36
   0  11   4   21.32   12.95
   0  11  -4   19.18    9.17
   0  11  -4   18.83    8.07
   0  11   5    1.89   12.26
   0  11   5   12.11   12.55
   0  11   6  299.77   20.18
   0  11   6  278.65   18.98
   0  11   7   49.62   12.50
   0  11   7   58.24   14.00
   0  11   8   31.74   13.45
   0  11   8   39.96   12.90
   0  11   9  159.92   16.49
   0  11   9  202.42   17.39
   0  11  10   -7.47   14.10
   0  11  10  -17.79   14.00
   0  11  11  187.97   17.09
   0  11  11  234.16   19.48
   0  11  12  -10.06   14.05
   0  11  12   11.81   13.95
   0  11  13  161.37   17.39
   0  11  13  115.73   15.29
   0  12   0  145.58   16.49
   0  12   0  116.48   17.84
   0  12   1   -3.74   14.25
   0  12   1   -2.79   15.29
   0  12  -1   -5.08   15.39
   0  12  -1   23.37   14.60
   0  12   2   91.82   16.19
   0  12   2   82.70   15.34
   0  12  -2  106.82   13.80
   0  12  -2   80.81   16.99
   0  12   3   32.03   14.40
   0  12   3   64.07   14.85
   0  12  -3   35.82   12.26
   0  12  -3   43.09   15.10
   0  12   4   27.75   14.90
   0  12   4   49.67   14.45
   0  12   5   76.72   16.29
   0  12   5   56.30   15.00
   0  12   6   -1.25   14.70
   0  12   6   14.45   14.25
   0  12   7   21.17   14.70
   0  12   7   12.16   14.35
   0  12   8   89.58   15.89
   0  12   8   59.83   14.25
   0  12   9    3.89   15.29
   0  12   9   -1.69   15.10
   0  12  10  124.20   16.89
   0  12  10  163.36   16.79
   0  12  11   11.21   16.74
   0  12  11   28.65   15.64
   0  13   1   55.85   19.18
   0  13   1   90.37   20.97
   0  13  -1   33.58   18.93
   0  13  -1   93.36   16.59
   0  13   2   37.96   17.44
   0  13   2   -0.30   17.99
   0  13  -2    8.72   15.15
   0  13  -2    6.18   16.69
   0  13  -3   20.13    8.97
   0  13  -3    6.38    8.72
   0  13   4   21.07   17.39
   0  13   4    8.77   16.84
   0  13   5   -7.37   16.84
   0  13   5   -0.65   17.39
   0  13   6   44.04   17.99
   0  13   6   76.87   19.28
   0  13   7   -6.93   18.53
   0  13   7   15.79   18.43
  -1   0  23   15.59   14.35
  -1   0  23    8.72   13.70
  -1   0  21  -10.06   12.16
  -1   0  21   -7.42   12.85
  -1   0  20  388.40   21.57
  -1   0  20  425.17   23.32
  -1   0  19   10.81   10.26
  -1   0  19   -1.84   10.31
  -1   0  18 1151.35   51.46
  -1   0  18 1196.69   53.31
   1   0 -17    0.15    9.47
  -1   0  17    2.64    9.91
  -1   0  17   -7.22   10.01
   1   0 -16  992.93   44.94
  -1   0  16  995.91   44.44
  -1   0  16  960.04   43.54
   1   0 -15    1.89    9.32
  -1   0  15   -2.44    8.97
  -1   0  15   15.94    9.72
   1   0 -14 1366.08   59.83
  -1   0  14 1459.74   63.92
  -1   0  14 1426.86   62.28
   1   0 -13    0.80    9.12
  -1   0  13   -4.98    8.52
  -1   0  13    4.43    9.32
   1   0 -12  665.60   31.44
  -1   0  12  691.51   32.23
  -1   0  12  655.64   30.04
   1   0 -11    2.19    8.57
  -1   0  11  -11.66    8.07
  -1   0  11    1.00    8.27
   1   0 -10  806.10   36.82
  -1   0  10  842.47   38.16
  -1   0  10  784.18   36.02
   1   0  -9    1.10    8.32
  -1   0   9    5.73    8.07
  -1   0   9    3.54    8.02
   1   0  -8 1467.72   63.47
  -1   0   8 1528.99   65.76
   1   0  -7    7.17    7.92
  -1   0   7    4.38    7.77
   1   0  -6  397.47   20.13
  -1   0   6  422.93   20.58
   1   0  -5   -7.22    7.92
  -1   0   5   -3.04    6.93
   1   0  -3  -11.61    7.27
  -1   0   3    5.68    6.78
   1   0  -2  412.27   18.68
  -1   0   2  413.56   18.78
   1   0  -1   -3.49    3.79
  -1   0   1    7.07    3.69
   1   0   0   74.68    4.73
  -1   0   0   75.58    4.68
   1   0   1   10.06    4.58
  -1   0  -1    2.89    3.84
   1   0   2 1210.64   51.22
  -1   0  -2 1334.69   56.15
   1   0   3    3.84    5.28
   1   0   3    0.50    6.23
  -1   0  -3    1.30    6.13
   1   0   4  959.05   41.55
   1   0   4  937.62   40.45
  -1   0  -4  948.09   41.10
   1   0   5   -2.34    6.93
   1   0   5    2.84    7.02
  -1   0  -5    0.25    6.88
   1   0   6 1398.47   59.83
   1   0   6 1316.26   56.65
  -1   0  -6 1372.06   58.64
   1   0   7    8.87    7.07
   1   0   7   -2.39    6.83
   1   0   8  910.72   40.35
   1   0   8 1066.16   46.68
   1   0   9   -0.25    8.82
   1   0   9  -13.65    7.67
   1   0  10   94.01    9.72
   1   0  10  122.46   10.51
   1   0  11   -6.48    7.97
   1   0  11    7.02    7.82
   1   0  12   54.30    9.57
   1   0  12   28.45    8.27
   1   0  13    9.72   10.16
   1   0  13   -0.60    7.87
   1   0  14 1283.88   56.45
   1   0  14 1312.28   57.24
   1   0  15   15.05   10.11
   1   0  15    4.63    8.97
   1   0  16 1755.68   75.58
   1   0  16 1932.04   82.70
   1   0  17    6.38   10.11
   1   0  17   -9.22    9.81
   1   0  18  204.26   14.10
   1   0  18  164.86   14.80
   1   0  19    1.69   10.96
   1   0  19  -12.31   10.06
   1   0  20  236.85   16.59
   1   0  20  202.32   15.29
   1   0  21   -4.28   12.21
   1   0  21   -0.10   12.46
   1   0  22   -2.79   11.96
   1   0  22   -5.63   14.15
  -1  -1  23  106.12   16.09
  -1   1  23   87.58   14.60
  -1  -1  22    8.57   12.65
  -1  -1  22    0.70   13.00
  -1   1  22    1.00   12.46
  -1   1  22   -6.58   13.55
  -1  -1  21   96.25   13.85
  -1  -1  21  144.03   15.64
  -1   1  21   61.43   12.11
  -1   1  21   74.98   13.00
  -1  -1  20    7.77   10.71
  -1  -1  20   -7.32   11.06
  -1   1  20  -27.00   11.31
  -1   1  20   -8.57   11.11
  -1  -1  19  735.35   34.43
  -1  -1  19  717.92   34.08
  -1   1  19  596.35   29.79
  -1   1  19  664.11   32.13
  -1  -1  18   27.40    9.96
  -1  -1  18   13.70   10.26
  -1   1  18    1.94    9.37
  -1   1  18    5.63    9.47
  -1  -1  17 1237.54   54.60
  -1  -1  17 1147.87   51.07
   1   1 -17 1139.90   50.72
  -1   1  17 1138.90   50.87
  -1   1  17 1162.32   51.81
   1  -1 -16   -3.49    9.12
  -1  -1  16   24.61   10.56
  -1  -1  16   27.05    9.62
   1   1 -16    2.59   10.11
  -1   1  16   31.64   10.81
  -1   1  16    2.44    8.92
   1  -1 -15  773.22   36.47
  -1  -1  15  732.86   34.58
  -1  -1  15  657.63   30.49
   1   1 -15  726.88   34.23
  -1   1  15  708.95   33.48
  -1   1  15  731.86   34.13
   1  -1 -14   13.95    9.32
  -1  -1  14   29.94    8.82
  -1  -1  14   22.87    8.77
   1   1 -14   26.31    9.17
  -1   1  14   11.91    9.02
  -1   1  14   16.04    9.81
   1  -1 -13  752.79   35.32
  -1  -1  13  804.60   36.87
  -1  -1  13  779.69   35.72
   1   1 -13  782.18   36.32
  -1   1  13  820.05   37.61
  -1   1  13  805.60   37.17
   1  -1 -12   33.08    9.57
  -1  -1  12   36.07    9.17
  -1  -1  12   44.59    8.62
   1   1 -12   40.75    9.12
  -1   1  12   47.93   10.16
  -1   1  12   26.75    9.22
   1  -1 -11  416.35   22.07
  -1  -1  11  331.51   17.74
  -1  -1  11  361.25   19.33
   1   1 -11  364.04   20.03
  -1   1  11  419.64   22.17
  -1   1  11  406.79   21.27
   1  -1 -10   81.95   10.56
  -1  -1  10   75.38    8.72
  -1  -1  10   73.29    9.12
   1   1 -10   84.79    9.86
  -1   1  10   82.90   10.41
  -1   1  10   62.48    9.37
   1  -1  -9  928.16   41.80
  -1  -1   9  822.04   37.02
   1   1  -9  828.52   37.47
  -1   1   9  939.12   42.05
  -1   1   9  847.45   37.91
   1  -1  -8   -5.63    8.52
  -1  -1   8   -2.84    7.47
   1   1  -8   -2.79    7.42
  -1   1   8   -5.68    8.77
  -1   1   8   12.16    8.57
   1  -1  -7 2824.83  119.22
  -1  -1   7 2757.07  115.98
   1   1  -7 2542.35  106.96
  -1   1   7 2612.59  110.15
   1  -1  -6   11.21    8.52
  -1  -1   6    4.78    6.93
   1   1  -6   -1.94    7.07
  -1   1   6    3.69    6.78
   1  -1  -5 5131.52  213.78
  -1  -1   5 5231.17  217.62
   1   1  -5 4464.92  185.98
  -1   1   5 4973.59  207.10
   1  -1  -4 1670.98   71.04
  -1  -1   4 1530.49   65.02
   1  -1  -3 2637.01  110.35
  -1  -1   3 2507.47  104.77
   1  -1  -2  421.48   19.68
  -1  -1   2  399.96   18.04
   1  -1  -1 1077.62   45.79
  -1  -1   1 1068.65   45.09
   1   1  -1 1057.19   44.69
  -1   1   1 1179.25   49.87
   1  -1   0  764.75   32.43
  -1  -1   0  776.70   33.28
   1   1   0  818.55   35.07
  -1   1   0  769.23   32.58
   1  -1   1   36.02    3.39
  -1  -1  -1   33.53    6.48
   1   1   1   45.09    7.07
  -1   1  -1   30.44    3.29
   1  -1   2   64.32    5.08
  -1  -1  -2   57.54    7.72
   1   1   2   73.34    8.17
  -1   1  -2   64.17    4.98
   1  -1   3 3143.68  130.68
   1  -1   3 2996.21  124.50
   1   1   3 3120.27  130.28
  -1   1  -3 3024.61  125.70
   1  -1   4   63.12    6.63
   1  -1   4   62.82    6.78
   1   1   4   74.68    8.82
   1   1   4   72.39    8.47
  -1   1  -4   63.77    6.78
   1  -1   5 3476.48  144.93
   1  -1   5 3338.48  139.10
  -1  -1  -5 3682.24  153.75
   1   1   5 3584.10  149.76
   1   1   5 3401.25  142.24
   1  -1   6  334.20   16.54
   1  -1   6  341.57   16.84
  -1  -1  -6  373.36   18.68
   1   1   6  373.41   18.98
   1   1   6  353.53   18.23
   1  -1   7 2516.94  105.82
   1  -1   7 2686.33  112.69
   1   1   7 2818.35  118.77
   1   1   7 2831.80  119.37
   1  -1   8  126.69   10.01
   1  -1   8  113.64    9.32
   1   1   8  126.79   11.26
   1   1   8  133.52   10.96
   1  -1   9 1370.57   58.99
   1  -1   9 1451.77   62.43
   1   1   9 1479.17   63.77
   1   1   9 1565.86   67.66
   1  -1  10   51.66    8.77
   1  -1  10   43.29    8.17
   1   1  10   47.03    9.47
   1   1  10   69.55   10.41
   1  -1  11   24.26    7.52
   1  -1  11   34.18    9.27
   1   1  11   15.64    9.22
   1   1  11   32.83    9.86
   1  -1  12   21.02    9.91
   1  -1  12   19.93    7.87
   1   1  12   33.98    9.62
   1   1  12   29.10    9.47
   1  -1  13  878.84   39.26
   1  -1  13  821.54   37.02
   1   1  13  901.75   40.75
   1   1  13  902.75   40.65
   1  -1  14   32.48    9.27
   1  -1  14   33.13    9.07
   1   1  14   35.72   10.46
   1   1  14   19.48    9.86
   1  -1  15 1113.99   49.47
   1  -1  15 1231.07   54.20
   1   1  15 1250.50   55.55
   1   1  15 1249.50   55.10
   1  -1  16   47.28   10.31
   1  -1  16   44.69   10.01
   1   1  16   55.70   11.66
   1   1  16   50.02   10.66
   1  -1  17  973.00   43.69
   1  -1  17  948.09   42.10
   1   1  17 1061.18   47.38
   1   1  17 1090.57   48.62
   1  -1  18    4.68   10.21
   1  -1  18   16.64   10.56
   1   1  18   -2.64   11.51
   1   1  18   11.36   10.46
   1  -1  19  326.08   19.63
   1  -1  19  337.83   20.03
   1   1  19  331.41   18.83
   1   1  19  326.67   19.93
   1  -1  20   -7.57   11.51
   1  -1  20  -10.06   11.86
   1   1  20   -9.02   11.11
   1   1  20   -1.89   10.46
   1  -1  21   25.01   12.65
   1  -1  21    7.57   12.46
   1   1  21   24.61   11.81
   1   1  21   16.64   12.21
   1  -1  22  -12.95   14.80
   1  -1  22    9.27   14.10
   1   1  22    1.64   13.50
   1   1  22    1.44   13.00
  -1  -2  22  103.73   15.44
  -1  -2  22   98.84   14.45
  -1   2  22   38.21   14.15
  -1   2  22   66.26   13.35
  -1  -2  21   23.12   11.91
  -1  -2  21    7.37   14.15
  -1   2  21   22.42   13.00
  -1   2  21   24.31   12.01
  -1  -2  20  379.38   22.42
  -1  -2  20  355.12   20.18
  -1   2  20  202.42   15.29
  -1   2  20  234.51   16.84
  -1  -2  19   46.38   10.51
  -1  -2  19   56.80   11.16
  -1   2  19   13.65   10.91
  -1   2  19   17.84   10.81
  -1  -2  18  587.88   28.40
  -1  -2  18  615.28   29.59
  -1   2  18  537.07   28.00
  -1   2  18  528.10   27.25
  -1  -2  17  131.18   11.86
  -1  -2  17  148.66   13.40
  -1   2  17   99.69   11.46
  -1   2  17   96.00   11.86
   1  -2 -16  475.89   24.76
  -1  -2  16  461.44   23.12
  -1  -2  16  482.51   24.66
   1   2 -16  437.92   22.77
  -1   2  16  467.37   24.91
  -1   2  16  513.65   25.31
   1  -2 -15   26.26   10.81
  -1  -2  15   55.75    9.91
   1   2 -15   57.99   10.51
  -1   2  15   26.80   10.56
  -1   2  15   36.32   11.51
   1  -2 -14 1462.73   64.22
  -1  -2  14 1422.88   61.73
  -1  -2  14 1384.02   60.28
   1   2 -14 1299.32   56.70
  -1   2  14 1352.63   59.83
   1  -2 -13    4.18   10.31
  -1  -2  13    5.18    7.92
  -1  -2  13   13.15    7.92
   1   2 -13  -12.50    8.37
  -1   2  13   14.50    8.17
  -1   2  13    9.72   10.61
   1  -2 -12  353.38   19.78
  -1  -2  12  368.92   19.43
  -1  -2  12  338.03   17.84
   1   2 -12  339.63   18.78
  -1   2  12  339.63   19.73
  -1   2  12  374.70   20.68
   1  -2 -11  135.41   12.70
  -1  -2  11  119.57   10.76
  -1  -2  11  121.21   10.16
   1   2 -11  128.74   11.61
  -1   2  11  137.21   12.16
  -1   2  11  145.43   12.75
  -1  -2  10  345.71   18.18
  -1  -2  10  340.62   17.79
   1   2 -10  344.66   18.18
  -1   2  10  341.82   19.08
   1  -2  -9   72.14    9.81
  -1  -2   9   68.75    8.17
   1   2  -9   64.12    8.97
  -1   2   9   44.39    9.27
  -1   2   9   60.18    9.12
   1  -2  -8 1409.92   61.13
  -1  -2   8 1303.81   56.05
   1   2  -8 1216.12   52.61
  -1   2   8 1306.80   56.90
   1  -2  -7   69.05    8.97
  -1  -2   7   68.20    7.47
   1   2  -7   84.40    8.77
  -1   2   7   67.66    8.52
  -1   2   7   76.82    9.27
  -1   2   6 4715.52  196.89
  -1   2   6 4971.10  207.40
   1  -2  -5  627.74   28.95
  -1  -2   5  585.89   26.11
   1   2  -5  569.45   25.61
  -1   2   5  622.26   28.45
  -1   2   5  678.56   31.29
   1  -2  -4 3533.28  147.82
  -1  -2   4 3420.68  142.54
   1   2  -4 3193.00  133.12
  -1   2   4 2903.05  121.71
   1  -2  -3  126.54   10.31
  -1  -2   3  126.35    8.72
   1   2  -3  116.23    8.37
  -1   2   3  114.79    9.27
   1  -2  -2 1059.19   45.54
  -1  -2   2 1153.85   49.12
   1   2  -2 1149.36   49.02
  -1   2   2 1091.07   46.98
   1  -2  -1   32.13    6.23
  -1  -2   1   31.44    6.78
   1   2  -1   38.41    7.17
  -1   2   1   52.21    7.47
   1   2   0  319.95   16.19
  -1   2   0  295.09   14.40
   1  -2   1  120.17    6.48
  -1  -2  -1  135.76   10.11
   1   2   1  146.17   10.71
  -1   2  -1  147.07    7.72
  -1  -2  -2 4802.71  199.68
   1   2   2 5181.35  215.47
   1  -2   3   47.68    3.29
   1  -2   3   43.44    3.09
  -1  -2  -3   58.64    7.67
   1   2   3   41.25    7.47
   1   2   3   60.63    9.37
   1  -2   4 4019.03  166.95
   1  -2   4 4188.92  174.07
   1   2   4 4883.92  203.62
   1   2   4 4652.25  193.90
   1  -2   5    2.54    4.83
   1  -2   5   10.86    4.63
  -1  -2  -5   -7.52    8.22
   1   2   5    8.42    8.37
   1   2   5   -0.15    9.22
   1  -2   6 4489.83  186.73
  -1  -2  -6 4883.92  203.77
   1   2   6 5231.17  218.26
   1   2   6 4650.26  194.15
   1  -2   7   69.20    7.97
   1  -2   7   78.57    7.97
  -1  -2  -7   76.42    9.02
   1   2   7   73.14    9.02
   1   2   7   66.41    8.92
   1  -2   8 1450.28   61.88
   1  -2   8 1355.62   57.69
   1   2   8 1635.11   70.45
   1   2   8 1468.21   63.62
   1  -2   9   46.93    7.17
   1  -2   9   37.51    7.22
   1   2   9   30.24    8.37
   1   2   9   44.44   10.11
   1  -2  10  267.59   15.25
   1  -2  10  293.34   15.69
   1  -2  11   43.89    8.47
   1  -2  11   40.90    7.87
   1   2  11   40.30   10.01
   1   2  11   61.58   11.01
   1  -2  12   63.62    9.02
   1  -2  12   41.65    9.02
   1   2  12   61.28   10.81
   1   2  12   63.17   11.86
   1  -2  13    2.74    7.97
   1  -2  13   13.95    8.92
   1   2  13   -2.39   11.01
   1   2  13   17.24    9.47
   1  -2  14 1373.06   59.49
   1  -2  14 1545.44   67.31
   1   2  14 1566.36   68.30
   1   2  14 1592.77   69.10
   1  -2  15   19.53    8.62
   1  -2  15    6.93    9.22
   1   2  15   -8.22    9.07
   1   2  15    6.28   10.06
   1  -2  16 1488.64   64.57
   1  -2  16 1523.51   65.96
   1   2  16 1617.68   70.20
   1   2  16 1590.27   69.05
   1  -2  17    4.18   10.46
   1  -2  17   11.21   10.06
   1   2  17   31.39   11.26
   1   2  17   29.10    9.91
   1  -2  18  232.86   16.29
   1  -2  18  255.28   16.44
   1   2  18  283.68   17.49
   1   2  18  261.91   15.94
   1  -2  19    0.45   10.96
   1  -2  19    2.34   11.26
   1   2  19   -5.28    9.86
   1   2  19   -7.32   10.46
   1  -2  20  238.44   17.19
   1  -2  20  219.91   16.34
   1   2  20  219.96   17.29
   1   2  20  235.65   16.24
   1  -2  21   -1.39   13.50
   1  -2  21    6.78   13.15
   1   2  21   -4.88   11.31
   1   2  21    7.92   12.75
   1  -2  22   24.16   14.90
   1  -2  22    8.32   13.70
  -1  -3  22   11.51   13.20
  -1  -3  22   20.28   16.19
  -1   3  22    4.78   12.01
  -1   3  22   15.29   13.60
  -1  -3  21  174.97   17.29
  -1  -3  21  117.63   14.45
  -1   3  21   11.16   12.16
  -1   3  21   26.11   11.81
  -1  -3  20   19.83   10.41
  -1  -3  20   25.76   13.25
  -1   3  20   21.12   10.91
  -1   3  20    7.52   11.71
  -1  -3  19  415.65   22.52
  -1  -3  19  392.29   20.87
  -1   3  19  220.41   16.89
  -1   3  19  228.03   16.74
  -1  -3  18  113.14   12.65
  -1  -3  18  109.01   11.01
  -1   3  18   77.02   12.70
  -1   3  18   94.96   14.15
  -1  -3  17  645.68   30.39
  -1  -3  17  608.81   28.70
  -1  -3  16   62.08   11.71
  -1  -3  16   62.82    9.42
  -1   3  16    9.42   12.41
  -1   3  16   -0.50   12.46
   1  -3 -15  724.39   34.72
  -1  -3  15  749.30   34.28
  -1  -3  15  776.70   35.17
   1   3 -15  790.16   36.32
  -1   3  15  745.32   35.22
   1  -3 -14    5.68   12.11
  -1  -3  14   -0.85    7.02
  -1  -3  14  -10.96    8.77
   1   3 -14   11.51    8.47
  -1   3  14    3.24    9.12
  -1   3  14    4.09   11.46
   1  -3 -13 1142.89   51.76
  -1  -3  13 1005.38   44.34
  -1  -3  13 1003.89   44.59
   1   3 -13 1010.86   44.79
  -1   3  13 1115.98   50.32
  -1   3  13 1220.11   54.01
   1  -3 -12  461.84   24.11
  -1  -3  12  443.95   21.52
  -1  -3  12  417.10   20.43
   1   3 -12  437.13   22.27
  -1   3  12  403.75   21.47
  -1   3  12  469.31   24.06
  -1  -3  11  319.95   16.59
  -1  -3  11  296.43   15.54
  -1   3  11  250.95   15.99
  -1   3  11  235.30   15.84
   1  -3 -10   58.34   10.86
  -1  -3  10   48.58    6.43
   1   3 -10   46.33    8.82
  -1   3  10   64.87   10.86
  -1   3  10   49.02   10.66
  -1   3   9 1370.07   59.54
  -1   3   9 1320.74   57.79
   1  -3  -8  216.37   15.29
  -1  -3   8  194.85   10.96
   1   3  -8  183.94   11.61
  -1   3   8  203.42   14.15
  -1   3   8  200.63   14.70
   1  -3  -7 5046.83  210.84
  -1  -3   7 4691.61  195.45
  -1   3   7 5510.16  229.82
  -1   3   7 5241.13  218.96
   1  -3  -6  334.40   18.28
  -1  -3   6  292.75   14.50
   1   3  -6  295.98   14.85
  -1   3   6  329.56   17.84
  -1   3   6  345.06   18.73
   1  -3  -5 3618.47  151.70
  -1  -3   5 3204.46  133.72
   1   3  -5 3091.37  129.09
  -1   3   5 3389.80  142.19
  -1   3   5 3312.08  139.15
   1  -3  -4    5.83    7.67
  -1  -3   4    4.38    5.08
   1   3  -4    9.76    4.93
  -1   3   4   10.91    8.02
  -1   3   4   10.21    8.42
   1  -3  -3 1557.39   66.56
  -1  -3   3 1767.64   74.28
   1   3  -3 1656.54   69.85
  -1   3   3 1538.46   65.71
  -1   3   3 1706.36   72.69
   1  -3  -2   -4.09    7.32
  -1  -3   2    8.57    5.73
   1   3  -2   11.71    6.23
  -1   3   2   -2.19    7.37
  -1   3   2   -7.47    7.42
   1  -3  -1   86.54    8.37
  -1  -3   1   89.58    8.77
   1   3  -1   83.10    8.37
  -1   3   1   80.16    7.92
  -1   3   1   78.22    8.47
   1  -3   0   52.36    6.33
  -1  -3   0   49.07    8.77
   1   3   0   52.36    8.62
  -1   3   0   47.63    6.73
  -1   3   0   44.69    6.53
   1  -3   1  281.54   13.40
  -1  -3  -1  301.71   16.24
   1   3   1  302.16   16.44
  -1   3  -1  310.53   14.55
  -1   3  -1  286.32   13.45
  -1  -3  -2 3318.05  139.00
   1   3   2 3312.08  138.80
  -1   3  -2 3373.85  140.84
  -1   3  -2 3148.66  131.48
  -1  -3  -3 1895.67   80.36
   1   3   3 2142.79   90.87
   1   3   3 2026.70   85.89
  -1  -3  -4  292.55   16.24
   1   3   4  298.28   16.84
   1   3   4  308.69   17.54
   1  -3   5 4440.01  188.62
   1  -3   5 4225.29  179.55
  -1  -3  -5 4545.14  189.77
   1   3   5 4729.97  197.54
   1   3   5 4817.16  201.13
   1  -3   6   73.88    5.18
   1  -3   6   72.74    5.48
  -1  -3  -6   83.85    9.57
   1   3   6   62.67   10.31
   1   3   6   64.77    8.87
   1  -3   7 3479.97  145.13
  -1  -3  -7 3844.16  161.37
   1   3   7 3672.78  154.29
   1   3   7 3826.22  160.72
   1  -3   8  105.42    7.62
   1  -3   8  112.20    7.47
  -1  -3  -8   96.60   10.66
   1   3   8  126.59   11.81
   1   3   8  114.94   11.91
   1  -3   9  574.93   25.91
   1  -3   9  646.17   28.70
   1   3   9  756.28   35.07
   1   3   9  742.83   34.72
   1  -3  10  104.47    8.22
   1  -3  10   88.58    8.27
   1   3  10  137.60   13.55
   1   3  10   96.45   11.01
   1  -3  11   11.01    7.17
   1  -3  11   12.41    7.12
   1   3  11   29.00   10.66
   1   3  11    8.82   10.21
   1  -3  12   23.47    7.57
   1  -3  12   25.36    7.62
   1   3  12   18.53   10.26
   1   3  12   14.85   10.21
   1  -3  13  386.81   19.78
   1  -3  13  384.67   20.38
   1   3  13  484.75   25.76
   1   3  13  468.61   25.16
   1  -3  14  121.16   10.61
   1  -3  14   97.55    9.91
   1   3  14  120.22   13.85
   1   3  14  155.09   15.44
   1  -3  15 1266.94   55.10
   1  -3  15 1329.21   57.69
   1   3  15 1688.42   73.49
   1   3  15 1607.71   70.25
   1  -3  16  164.26   13.05
   1  -3  16  191.81   14.05
   1   3  16  199.03   15.84
   1   3  16  217.62   16.09
   1  -3  17  734.85   34.33
   1  -3  17  791.65   36.27
   1   3  17  804.60   37.32
   1   3  17  776.70   36.77
   1  -3  18   54.20   11.16
   1  -3  18   73.59   11.01
   1   3  18   49.57   12.26
   1   3  18   63.07   12.16
   1  -3  19  328.22   19.43
   1  -3  19  315.81   18.83
   1   3  19  300.42   18.63
   1   3  19  306.20   19.28
   1  -3  20   16.44   14.10
   1  -3  20   -5.08   11.81
   1   3  20   -6.73   11.71
   1   3  20    8.97   11.26
   1  -3  21   63.27   14.45
   1  -3  21   58.69   16.34
   1   3  21   74.48   13.40
   1   3  21   82.25   13.00
   1  -3  22   -9.02   14.65
   1  -3  22    3.44   17.79
   1   3  22    5.33   13.80
   1   3  22    6.03   11.01
  -1  -4  22   69.70   17.59
  -1  -4  22   32.33   14.40
  -1   4  22    9.81   12.65
  -1   4  22   18.53   13.45
  -1  -4  21   20.13   13.60
  -1  -4  21   13.20   17.69
  -1   4  21    2.74   13.35
  -1   4  21    6.53   13.50
  -1  -4  20  261.36   19.08
  -1  -4  20  215.42   16.34
  -1   4  20  127.14   14.70
  -1   4  20  121.96   15.00
  -1  -4  19   75.28   14.20
  -1  -4  19   56.55   11.16
  -1   4  19   46.38   12.50
  -1   4  19   79.31   13.10
  -1  -4  18  393.13   21.77
  -1  -4  18  431.75   22.57
  -1   4  18  421.68   23.47
  -1   4  18  407.88   22.52
  -1  -4  17    3.54    9.91
  -1  -4  17   -2.34    8.92
  -1   4  17    6.68   10.91
  -1   4  17   -1.39    9.57
  -1  -4  16  686.53   31.69
  -1  -4  16  757.27   34.53
  -1   4  16  991.93   44.94
  -1   4  16  925.67   42.70
  -1  -4  15  235.75   14.05
  -1  -4  15  213.73   14.80
   1   4 -15  275.66   16.44
  -1   4  15  282.68   17.99
  -1   4  15  297.58   18.98
  -1  -4  14 1440.81   61.63
  -1  -4  14 1411.92   60.68
  -1   4  14 1617.18   70.50
  -1   4  14 1740.23   75.83
   1  -4 -13   24.91   12.06
  -1  -4  13    2.64    6.53
  -1  -4  13   15.54    8.42
   1   4 -13   12.75    7.77
  -1   4  13   12.75   12.21
  -1   4  13   -0.75   10.11
   1  -4 -12  680.55   33.23
  -1  -4  12  726.88   32.88
  -1   4  12  711.94   34.08
  -1   4  12  659.13   31.84
   1  -4 -11  151.01   14.15
  -1  -4  11  157.73   10.51
  -1  -4  11  123.01    9.52
   1   4 -11  181.55   12.21
  -1   4  11  132.57   12.90
  -1   4  11  170.98   13.65
   1  -4 -10  559.49   27.75
  -1  -4  10  578.92   26.45
   1   4 -10  593.86   27.40
  -1   4  10  503.19   25.71
  -1   4  10  523.61   26.06
   1  -4  -9  111.20   11.06
  -1  -4   9  106.32    7.72
   1   4  -9  109.16    8.67
  -1   4   9   89.88   10.16
  -1   4   9   93.21   11.91
   1  -4  -8 2589.18  109.66
  -1  -4   8 2185.13   91.72
  -1   4   8 2614.59  110.80
  -1   4   8 2540.85  108.06
   1  -4  -7   84.10   11.26
  -1  -4   7   74.98    6.13
   1   4  -7   68.35    6.93
  -1   4   7   82.25   11.01
  -1   4   7   73.88   10.16
   1  -4  -6 3113.79  131.23
  -1  -4   6 3115.78  129.98
   1   4  -6 3258.27  136.06
  -1   4   6 3282.68  138.10
  -1   4   6 3248.80  136.81
   1  -4  -5   86.49    9.27
  -1  -4   5  111.90    7.57
   1   4  -5   90.13    6.93
  -1   4   5  118.87   11.21
  -1   4   5   76.47    8.97
   1  -4  -4 1945.50   82.90
  -1  -4   4 2046.13   85.89
   1   4  -4 2009.27   84.50
  -1   4   4 2012.75   85.74
  -1   4   4 2004.78   85.34
   1  -4  -3  102.63    9.27
  -1  -4   3  101.88    8.17
   1   4  -3   99.99    7.87
  -1   4   3  109.51   10.21
  -1   4   3  113.29   10.51
   1  -4  -2 1268.93   54.40
  -1  -4   2 1345.66   57.34
   1   4  -2 1434.83   61.18
  -1   4   2 1290.85   55.55
  -1   4   2 1356.62   58.29
   1  -4  -1  221.60   12.85
  -1  -4   1  253.29   14.10
   1   4  -1  304.80   15.79
  -1   4   1  267.34   14.40
  -1   4   1  277.80   15.20
  -1  -4   0    0.65    7.77
   1   4   0   19.58    7.67
  -1   4   0   22.97    6.53
  -1   4   0   25.91    6.63
  -1  -4  -1   30.49    8.12
   1   4   1   38.11    8.37
  -1   4  -1   35.87    6.23
  -1   4  -1   27.05    5.83
  -1  -4  -2 1108.51   48.38
   1   4   2 1157.83   50.47
   1   4   2 1157.83   50.62
  -1   4  -2 1207.65   51.02
  -1   4  -2 1135.91   47.98
  -1  -4  -3   99.99   10.26
   1   4   3  124.70   11.36
   1   4   3  120.22   10.86
  -1  -4  -4 2452.17  103.88
   1   4   4 2133.32   90.67
   1   4   4 2448.19  103.58
  -1  -4  -5    4.98    8.77
   1   4   5   16.29    9.07
   1   4   5   -1.84    8.52
  -1  -4  -6 2366.48  100.64
   1   4   6 2356.02  100.04
   1   4   6 2295.73   97.55
  -1  -4  -7  230.57   15.64
   1   4   7  197.04   14.60
   1   4   7  204.91   14.75
   1  -4   8 1657.03   69.60
   1  -4   8 1645.58   69.20
   1   4   8 1995.81   85.64
   1   4   8 1826.92   78.92
   1  -4   9  179.55    9.22
   1  -4   9  173.92    9.76
   1   4   9  190.22   14.50
   1   4   9  200.03   15.00
   1  -4  10  299.92   14.30
   1  -4  10  326.82   15.34
   1   4  10  357.51   20.08
   1   4  10  374.60   20.78
   1  -4  11  128.64    8.52
   1  -4  11  108.76    8.42
   1   4  11  111.75   11.91
   1   4  11  145.33   13.20
   1   4  12  139.35   13.55
   1   4  12  141.24   15.20
   1  -4  13   29.84    6.88
   1  -4  13   29.99    7.72
   1   4  13   45.79   11.11
   1   4  13   23.96   10.66
   1  -4  14  929.65   40.90
   1  -4  14  918.69   40.65
   1   4  14 1013.35   45.64
   1   4  14  943.10   43.24
   1  -4  15   -8.62    6.83
   1  -4  15   -2.19    8.92
   1   4  15   -4.78   12.01
   1   4  15   -0.70   11.06
   1  -4  16 1193.20   51.91
   1  -4  16 1158.33   50.72
   1   4  16 1356.12   60.13
   1   4  16 1344.66   59.49
   1  -4  17    4.83    8.62
   1  -4  17   24.36   10.46
   1   4  17   -1.64   11.51
   1   4  17  -11.06   12.26
   1  -4  18  357.16   19.58
   1  -4  18  400.01   22.07
   1   4  18  460.79   25.01
   1   4  18  440.07   24.61
   1  -4  19   49.12   14.75
   1  -4  19   40.30   11.71
   1   4  19   58.69   13.20
   1   4  19   26.45   12.90
   1  -4  20   73.93   16.94
   1  -4  20   62.28   13.40
   1   4  20   92.47   14.40
   1   4  20  102.68   13.15
   1  -4  21   37.22   13.70
   1  -4  21   36.82   18.48
   1   4  21   29.74   13.70
   1   4  21   47.58   14.65
  -1  -5  21   70.80   20.03
  -1  -5  21   10.81   17.94
  -1   5  21   -9.32   11.01
  -1   5  21  -19.23   13.35
  -1   5  20   18.73   11.46
  -1   5  20   13.35   12.06
  -1  -5  19  574.43   30.09
  -1  -5  19  593.86   30.24
  -1   5  19  628.24   31.59
  -1   5  19  585.39   28.95
  -1  -5  18   29.69   12.80
  -1  -5  18   35.32   12.21
  -1   5  18   31.14   11.11
  -1   5  18   62.62   13.75
  -1  -5  17  662.61   31.04
  -1  -5  17  659.13   31.54
  -1   5  17  809.09   38.21
  -1   5  17  851.43   39.91
  -1  -5  16    5.93   10.41
  -1  -5  16    6.28    8.27
  -1   5  16    1.44   12.31
  -1   5  16   -0.10   12.60
  -1  -5  15  739.84   33.73
  -1  -5  15  764.75   34.53
  -1   5  15  864.89   40.45
  -1   5  15  931.65   42.80
  -1  -5  14   51.17    7.92
  -1  -5  14   53.71    9.22
   1   5 -14   71.84   10.21
  -1   5  14   38.56   11.31
  -1   5  14   47.53   11.81
  -1  -5  13 1088.08   46.83
  -1  -5  13 1069.65   46.58
   1   5 -13 1079.11   47.33
  -1   5  13 1261.46   55.95
  -1   5  13 1227.58   55.00
  -1  -5  12  214.98   12.16
  -1  -5  12  217.97   12.21
   1   5 -12  226.63   13.70
  -1   5  12  212.24   16.09
  -1   5  12  212.39   16.74
  -1   5  11   90.72   11.66
  -1   5  11   78.32   12.80
   1  -5 -10   37.96   10.01
  -1  -5  10   50.97    5.98
  -1  -5  10   53.51    5.98
   1   5 -10   44.94    7.12
  -1   5  10   61.13   11.21
  -1   5  10   45.14    9.52
  -1   5   9 1355.62   59.69
  -1   5   9 1379.03   60.33
   1  -5  -8   13.40    8.57
  -1  -5   8   17.79    4.63
   1   5  -8    9.67    5.03
  -1   5   8   29.54   10.01
  -1   5   8   24.96    8.72
   1   5  -7 1750.20   73.68
  -1   5   7 2057.59   87.93
  -1   5   7 1974.89   84.74
   1  -5  -6    9.27    9.32
  -1  -5   6   17.19    5.08
   1   5  -6   19.18    4.88
  -1   5   6   28.35    8.92
  -1   5   6   22.02    8.97
   1  -5  -5 2479.57  105.17
  -1  -5   5 2385.91  100.04
   1   5  -5 2444.70  102.38
  -1   5   5 2529.89  107.21
  -1   5   5 2644.48  111.85
   1  -5  -4  240.68   14.85
  -1  -5   4  255.73   12.90
   1   5  -4  230.97   12.16
  -1   5   4  261.16   15.54
  -1   5   4  257.77   15.39
  -1  -5   3 1776.60   74.93
   1   5  -3 1904.14   80.51
  -1   5   3 1726.78   73.83
  -1   5   3 1945.99   82.85
  -1  -5   2  312.57   16.19
   1   5  -2  344.76   17.49
  -1   5   2  299.12   16.09
  -1   5   2  334.74   17.49
  -1  -5   1  228.53   13.20
  -1   5   1  289.31   15.54
  -1   5   1  308.74   16.29
  -1  -5   0  340.03   17.94
   1   5   0  329.96   17.24
   1   5   0  332.00   16.94
  -1   5   0  348.30   17.14
  -1   5   0  351.19   17.54
  -1  -5  -1  175.37   12.41
   1   5   1  170.04   12.11
   1   5   1  186.23   12.60
  -1   5  -1  200.28   11.36
  -1   5  -1  209.79   11.96
  -1  -5  -2  139.00   11.76
   1   5   2  131.93   10.71
   1   5   2  179.65   12.41
  -1   5  -2  156.74    8.82
  -1   5  -2  163.46    9.47
  -1  -5  -3 1541.95   66.66
   1   5   3 1401.95   60.78
   1   5   3 1424.87   61.73
  -1   5  -3 1516.54   63.87
  -1   5  -3 1450.78   61.03
  -1  -5  -4   -1.20    7.92
   1   5   4    0.60    8.62
   1   5   4    1.54    8.77
  -1  -5  -5 2461.14  104.72
   1   5   5 2215.03   94.11
   1   5   5 2270.33   96.75
  -1  -5  -6    6.88    9.81
   1   5   6   18.88    9.76
   1   5   6    6.43    9.22
  -1  -5  -7 1499.60   65.56
   1   5   7 1477.18   64.62
   1   5   7 1525.01   66.51
   1   5   8  294.64   17.94
   1   5   8  322.14   19.53
   1   5   9  877.84   40.45
   1   5   9  831.01   39.26
   1   5  10  115.28   12.50
   1   5  10  103.33   12.60
   1   5  11   12.01   10.46
   1   5  11    3.84   10.46
   1  -5  12   67.31    6.03
   1  -5  12   85.04    6.73
   1   5  12   82.30   12.60
   1   5  12   95.85   12.70
   1  -5  13  623.26   27.55
   1  -5  13  613.79   27.40
   1   5  13  712.43   34.38
   1   5  13  731.86   34.18
   1  -5  14  145.18   10.31
   1  -5  14  163.41    9.52
   1   5  14  224.04   17.14
   1   5  14  168.64   15.29
   1  -5  15  937.13   41.15
   1  -5  15  989.44   43.05
   1   5  15 1133.42   51.12
   1   5  15 1095.56   49.52
   1  -5  16   15.54    9.62
   1  -5  16   33.38    8.07
   1   5  16   46.28   12.75
   1   5  16   45.93   11.46
   1  -5  17  705.46   32.28
   1  -5  17  631.23   29.84
   1   5  17  728.38   35.22
   1   5  17  769.23   36.62
   1  -5  18   23.66   12.21
   1  -5  18    8.17   10.91
   1   5  18   25.31   11.11
   1   5  18   16.84   12.65
   1  -5  19  187.23   15.69
   1  -5  19  153.25   16.34
   1   5  19  192.46   16.94
   1   5  19  189.67   15.84
   1  -5  20   38.41   15.74
   1  -5  20   63.22   14.90
   1   5  20   54.50   11.76
   1   5  20   61.28   11.76
   1  -5  21   -8.42   17.64
   1  -5  21  -24.36   19.08
   1   5  21   12.70   13.20
   1   5  21   25.41   14.90
  -1  -6  20  140.69   19.83
  -1  -6  20  139.25   16.29
  -1   6  20  146.52   15.79
  -1   6  20  170.98   17.49
  -1   6  19   58.04   10.71
  -1   6  19   56.30   12.26
  -1  -6  18  448.04   24.01
  -1  -6  18  445.00   22.67
  -1   6  18  414.41   22.97
  -1   6  18  503.69   26.75
  -1  -6  17   -0.10    8.62
  -1  -6  17   -6.97   10.46
  -1   6  17    0.90   11.61
  -1   6  17   28.70   13.20
  -1  -6  16  670.59   30.99
  -1  -6  16  743.82   32.83
  -1   6  16  882.82   41.50
  -1   6  16  839.98   39.26
  -1  -6  15   28.65    8.22
  -1  -6  15    9.22    6.78
  -1   6  15    2.99   12.31
  -1   6  15   23.07   12.90
  -1  -6  14  854.92   37.51
  -1  -6  14  886.81   38.61
  -1   6  14  977.98   44.49
  -1   6  14 1025.31   46.53
  -1  -6  13   45.34    5.98
  -1  -6  13   26.80    6.38
  -1   6  13   33.58   11.81
  -1   6  13   19.73   10.36
  -1  -6  12  355.92   16.89
  -1  -6  12  379.93   17.59
  -1   6  12  195.20   15.49
  -1   6  12  221.10   16.29
  -1  -6  11   44.49    5.53
  -1  -6  11   53.61    6.03
   1   6 -11   52.16    6.53
  -1   6  11   48.58   12.21
  -1   6  11   52.61   11.96
  -1  -6  10  219.51   10.81
  -1  -6  10  197.09    9.96
  -1   6  10   94.36   12.31
  -1   6  10   92.22   13.60
   1   6  -9  135.96    8.07
  -1   6   9  109.36   11.21
  -1   6   9  144.38   13.45
  -1  -6   8  529.10   23.27
   1   6  -8  541.05   23.71
  -1   6   8  560.48   27.25
  -1   6   8  574.43   28.10
  -1  -6   7  198.19   10.21
   1   6  -7  159.08    8.77
  -1   6   7  170.24   12.55
  -1   6   7  199.48   14.30
  -1  -6   6 2190.11   91.77
   1   6  -6 2163.71   90.77
  -1   6   6 2261.36   96.35
  -1   6   6 2109.90   90.03
  -1  -6   5   86.34    7.42
   1   6  -5   74.63    6.33
  -1   6   5   99.99   10.61
  -1   6   5   88.03   10.21
  -1  -6   4 1700.88   71.94
   1   6  -4 1781.09   75.18
  -1   6   4 1970.41   84.05
  -1   6   4 1750.70   75.03
  -1  -6   3  639.20   28.70
   1   6  -3  644.68   29.00
  -1   6   3  626.25   29.15
  -1   6   3  623.75   29.29
  -1  -6   2 1512.55   64.37
   1   6  -2 1622.16   69.25
   1   6  -2 1556.40   66.36
  -1   6   2 1647.07   70.70
  -1   6   2 1515.54   65.17
  -1  -6   1  303.71   16.09
   1   6  -1  398.37   20.18
   1   6  -1  378.04   19.08
  -1   6   1  371.41   19.23
  -1   6   1  358.71   18.33
  -1  -6   0   16.24    7.77
   1   6   0   26.11    7.97
   1   6   0    2.49    7.22
  -1   6   0    2.44    7.82
  -1   6   0   19.18    6.83
  -1  -6  -1   58.84    8.97
   1   6   1   93.31   10.51
   1   6   1   80.61    9.67
  -1   6  -1   81.31    7.72
  -1   6  -1  100.44    8.62
  -1  -6  -2  733.86   34.03
   1   6   2  765.24   35.17
   1   6   2  727.38   33.48
  -1   6  -2  749.30   32.68
  -1   6  -2  744.82   32.53
  -1  -6  -3   18.68    8.47
   1   6   3   18.08    8.82
   1   6   3   33.08    9.12
  -1   6  -3   13.20    4.43
  -1   6  -3   26.75    4.83
  -1  -6  -4 1875.75   80.66
   1   6   4 2075.53   88.58
   1   6   4 2091.97   89.33
  -1  -6  -5   -3.09    9.27
   1   6   5   28.25    8.62
   1   6   5   25.41    9.67
  -1  -6  -6 1343.16   59.09
   1   6   6 1322.24   58.24
   1   6   6 1340.17   58.94
   1   6   7   19.83   10.46
   1   6   7   13.60   10.51
   1   6   8 1055.70   47.58
   1   6   8 1116.48   50.37
   1   6   9  273.52   18.13
   1   6   9  283.78   18.63
   1   6  10  122.41   13.70
   1   6  10  138.10   14.25
   1   6  11   19.93   11.26
   1   6  11   15.44   10.81
   1   6  12   68.90   12.01
   1   6  12  109.90   13.55
   1   6  13   26.06   10.86
   1   6  13   17.19   11.96
   1   6  14  867.38   40.40
   1   6  14  868.87   40.35
   1   6  15  108.36   12.36
   1   6  15  103.53   12.75
   1   6  16  894.28   41.25
   1   6  16  917.70   42.50
   1   6  17    4.23   12.80
   1   6  17   -2.64   12.31
   1   6  18  494.32   26.16
   1   6  18  507.67   27.25
   1   6  19   37.51   12.16
   1   6  19   28.10   13.00
   1   6  20   31.79   11.86
   1   6  20   11.11   13.95
  -1   7  19  198.09   16.19
  -1   7  19  226.04   16.99
  -1   7  18   41.00   14.05
  -1   7  18   29.69   11.06
  -1   7  17  619.77   31.09
  -1   7  17  653.15   31.89
  -1   7  16   -8.82   11.41
  -1   7  16   -1.64   10.66
  -1   7  15  521.12   26.90
  -1   7  15  575.93   29.34
  -1   7  14   62.92   13.05
  -1   7  14   45.19   13.30
  -1   7  13  268.73   17.29
  -1   7  13  301.27   18.88
  -1   7  12   85.54   12.46
  -1   7  12   75.73   13.50
  -1   7  11   41.40   11.36
  -1   7  11    6.13    9.62
  -1   7  10  163.76   15.29
  -1   7  10  201.67   16.19
  -1   7   9  289.96   18.78
  -1   7   9  294.24   18.83
  -1   7   8  139.40   11.86
  -1   7   8  113.74   12.85
  -1  -7   7  710.44   30.64
   1   7  -7  851.43   36.62
   1   7  -7  846.45   36.32
  -1   7   7  823.53   37.86
  -1   7   7  864.89   39.71
  -1  -7   6   13.40    5.23
   1   7  -6   14.75    4.98
   1   7  -6    7.52    4.48
  -1   7   6   18.13    9.76
  -1   7   6    4.38    8.87
  -1  -7   5 1652.05   69.80
   1   7  -5 1656.04   69.80
   1   7  -5 1640.59   69.40
  -1   7   5 1735.25   74.53
  -1   7   5 1735.25   74.78
  -1  -7   4   26.21    6.68
   1   7  -4   14.05    6.43
   1   7  -4   36.77    6.63
  -1   7   4   25.36    8.72
  -1   7   4   29.89    9.22
  -1  -7   3  773.22   34.63
   1   7  -3  871.86   38.51
   1   7  -3  842.97   36.97
  -1   7   3  790.16   35.92
  -1   7   3  787.66   35.97
  -1  -7   2   35.77    7.97
   1   7  -2   26.70    7.82
   1   7  -2   34.18    7.47
  -1   7   2   32.43    8.97
  -1   7   2   12.85    7.47
  -1  -7   1   35.72    8.27
   1   7  -1   34.08    8.07
   1   7  -1   30.39    8.27
  -1   7   1   38.76    7.92
  -1   7   1   40.55    8.37
  -1  -7   0  222.95   14.45
   1   7   0  217.72   13.10
  -1   7   0  231.02   13.75
  -1  -7  -1   74.13    9.32
   1   7   1   83.30   10.06
   1   7   1   77.07   10.01
  -1   7  -1   75.23    8.87
  -1   7  -1   81.86    8.22
  -1  -7  -2   67.66   10.16
   1   7   2   80.61   10.26
   1   7   2   76.33   10.06
  -1   7  -2   94.46    8.22
  -1   7  -2   81.56    7.27
  -1  -7  -3  489.39   23.91
   1   7   3  531.09   26.01
   1   7   3  595.85   28.70
  -1   7  -3  588.38   25.96
  -1   7  -3  612.79   27.15
  -1  -7  -4   21.77    9.76
   1   7   4   40.50    9.32
   1   7   4   38.06    9.81
  -1   7  -4   26.70    3.29
  -1   7  -4   27.10    3.34
  -1  -7  -5 1331.71   58.49
   1   7   5 1403.95   61.53
   1   7   5 1447.29   63.22
   1   7   6   26.40   10.21
   1   7   6   58.79   11.16
   1   7   7  694.00   33.18
   1   7   7  678.06   32.88
   1   7   8   23.66   11.46
   1   7   8   31.29   12.11
   1   7   9  173.58   15.34
   1   7   9  222.80   16.59
   1   7  10    5.13   12.01
   1   7  10   20.08   10.01
   1   7  11   75.83   11.96
   1   7  11  105.77   12.95
   1   7  12  133.77   13.90
   1   7  12  142.34   15.00
   1   7  13   77.92   12.36
   1   7  13   84.30   13.60
   1   7  14   35.87   12.31
   1   7  14   47.63   11.41
   1   7  15  646.17   30.94
   1   7  15  658.13   32.53
   1   7  16   -0.20   11.76
   1   7  16  -14.85   11.51
   1   7  17  323.24   21.12
   1   7  17  314.82   19.83
   1   7  18    8.82   11.46
   1   7  18   32.03   14.45
   1   7  19  167.85   14.90
   1   7  19  144.78   17.19
  -1   8  18  346.25   20.43
  -1   8  18  350.64   21.37
  -1   8  17   15.89   14.25
  -1   8  17    3.74   12.41
  -1   8  16  402.65   23.12
  -1   8  16  386.06   22.47
  -1   8  15  -17.04   13.35
  -1   8  15    3.49   11.01
  -1   8  14  346.70   20.78
  -1   8  14  378.14   22.02
  -1   8  13  183.79   15.34
  -1   8  13  166.80   14.70
  -1   8  12   56.05   11.96
  -1   8  12   78.77   13.40
  -1   8  11   54.50   12.55
  -1   8  11   35.67   11.56
  -1   8  10   27.60   11.11
  -1   8  10   14.45    9.86
  -1   8   9   47.88   11.36
  -1   8   9   65.12   12.41
  -1   8   8  269.03   18.43
  -1   8   8  255.33   17.29
  -1   8   7  145.97   14.20
  -1   8   7  138.80   13.95
   1   8  -6 1103.53   47.23
   1   8  -6 1088.58   46.58
  -1   8   6 1137.90   50.87
  -1   8   6 1153.35   51.41
  -1  -8   5   45.49    6.93
   1   8  -5   50.72    8.02
   1   8  -5   42.40    7.32
  -1   8   5   12.60   10.01
  -1   8   5   21.32   10.31
  -1  -8   4  559.49   25.71
   1   8  -4  570.94   26.40
   1   8  -4  595.85   27.20
  -1   8   4  647.17   30.99
  -1   8   4  667.10   31.79
  -1  -8   3    5.33    6.78
   1   8  -3   13.10    7.27
   1   8  -3    9.86    7.72
  -1   8   3   -8.47    9.67
  -1   8   3   -1.64    9.32
  -1  -8   2  346.50   18.48
   1   8  -2  421.93   21.47
  -1   8   2  464.58   23.61
  -1   8   2  490.63   24.91
  -1  -8   1   37.12    8.47
   1   8  -1   28.85    8.67
   1   8  -1   56.90    9.47
  -1   8   1   42.50    8.32
  -1   8   1   52.41    9.76
  -1  -8   0   18.48    8.42
   1   8   0   20.78    8.27
   1   8   0   24.81    9.42
  -1   8   0   57.99    9.91
  -1  -8  -1   44.49    8.77
   1   8   1   61.63    9.86
   1   8   1   95.21   11.71
  -1   8  -1   74.03    9.02
  -1  -8  -2  149.26   11.81
   1   8   2  231.62   16.19
   1   8   2  214.03   15.54
  -1   8  -2  239.29   13.60
  -1   8  -2  204.31   11.61
  -1  -8  -3   69.30   11.01
   1   8   3   75.33   11.96
   1   8   3   89.88   12.16
  -1   8  -3  108.36    8.87
  -1   8  -3   69.85    7.27
   1   8   4  678.06   32.88
  -1   8  -4  659.13   28.60
  -1   8  -4  644.18   28.15
   1   8   5   95.51   13.45
   1   8   5   49.97   11.96
   1   8   6  886.31   41.30
   1   8   6  875.35   41.10
   1   8   7   14.80   11.06
   1   8   7   17.09   11.91
   1   8   8 1574.83   69.20
   1   8   8 1414.91   62.33
   1   8   9  225.24   15.79
   1   8   9  217.07   17.24
   1   8  10   46.13   12.41
   1   8  10   38.21   11.66
   1   8  11   81.31   13.70
   1   8  11   85.84   13.70
   1   8  12   32.03   12.65
   1   8  12   17.59   11.11
   1   8  13   32.53   12.36
   1   8  13   34.18   13.00
   1   8  14  205.86   15.29
   1   8  14  241.48   17.84
   1   8  15    7.22   12.90
   1   8  15    7.67   13.35
   1   8  16  363.64   22.82
   1   8  16  335.44   21.07
   1   8  17   -4.83   13.50
   1   8  17   26.70   12.70
   1   8  18  295.39   20.43
   1   8  18  296.18   19.68
  -1   9  17  260.86   19.73
  -1   9  17  254.14   16.59
  -1   9  16  -22.77   13.80
  -1   9  16    1.00   13.85
  -1   9  15  330.01   21.02
  -1   9  15  309.49   20.08
  -1   9  14   64.27   14.50
  -1   9  14   36.37   12.70
  -1   9  13  199.63   16.04
  -1   9  13  204.31   15.49
  -1   9  12  132.67   14.85
  -1   9  12  121.16   13.85
  -1   9  11    4.23   12.36
  -1   9  11    2.14   11.16
  -1   9  10  122.21   14.45
  -1   9  10  139.00   14.25
  -1   9   9  270.73   18.48
  -1   9   9  279.34   18.23
  -1   9   8   11.41   10.81
  -1   9   8    2.39   11.36
  -1   9   7  388.10   22.22
  -1   9   7  371.91   20.83
   1   9  -6   35.12    5.43
   1   9  -6   27.45    6.03
  -1   9   6   42.80   11.21
  -1   9   6    4.14   11.11
   1   9  -5  649.66   29.54
   1   9  -5  603.83   27.35
  -1   9   5  651.16   31.54
  -1   9   5  665.11   32.23
   1   9  -4   10.51    7.97
   1   9  -4    7.52    9.96
  -1   9   4   14.60   11.41
  -1   9   4   31.09   11.36
   1   9  -3  544.04   26.36
   1   9  -3  491.98   24.86
  -1   9   3  531.59   26.65
  -1   9   3  452.22   23.76
   1   9  -2   35.17   11.56
   1   9  -2   27.40   11.01
  -1   9   2   38.21   10.76
  -1   9   2   58.39   11.61
   1   9  -1  100.24   12.36
   1   9  -1   84.55   11.71
   1   9   0  172.18   13.55
   1   9   0  151.16   14.05
  -1   9   0  187.72   13.95
   1   9   1    6.97   10.56
   1   9   1   14.00   10.81
   1   9   2  169.69   14.95
   1   9   2  163.36   15.59
  -1   9  -2  183.59   13.50
  -1   9  -2  146.97   10.96
   1   9   3   89.33   13.25
   1   9   3   73.44   12.75
   1   9   4   40.11   11.96
   1   9   4   34.53   12.31
  -1   9  -4   31.94    4.83
   1   9   5  901.26   41.80
   1   9   5  849.94   40.01
   1   9   6   38.56   11.81
   1   9   6   42.50   12.85
   1   9   7 1267.44   56.25
   1   9   7 1261.46   56.45
   1   9   8   93.46   13.30
   1   9   8   76.97   14.15
   1   9   9  192.11   16.29
   1   9   9  213.53   17.24
   1   9  10   64.27   12.60
   1   9  10   88.63   12.80
   1   9  11    9.17   11.91
   1   9  11    6.88   12.41
   1   9  12   45.19   12.85
   1   9  12   65.71   14.15
   1   9  13  113.49   14.35
   1   9  13  101.29   13.80
   1   9  14   21.02   14.05
   1   9  14    2.74   13.10
   1   9  15  237.35   18.23
   1   9  15  218.71   17.34
   1   9  16  -21.52   14.20
   1   9  16   -6.08   12.36
   1   9  17  230.37   18.63
   1   9  17  210.99   17.84
  -1  10  15  -20.23   13.65
  -1  10  15  -13.65   14.45
  -1  10  14  121.16   15.44
  -1  10  14  128.09   15.94
  -1  10  13   31.64   13.60
  -1  10  13   33.28   14.05
  -1  10  12   27.60   13.80
  -1  10  12   47.23   12.70
  -1  10  11   83.15   13.25
  -1  10  11  112.45   14.70
  -1  10  10   37.51   12.85
  -1  10  10   27.45   13.55
  -1  10   9   55.85   13.00
  -1  10   9   58.59   13.10
  -1  10   8  346.50   20.83
  -1  10   8  355.52   21.17
  -1  10   7   45.04   12.36
  -1  10   7   35.12   11.61
  -1  10   6  592.87   29.44
  -1  10   6  585.39   29.39
   1  10  -5   10.16    8.82
   1  10  -5   10.31    7.67
  -1  10   5   23.07   11.01
  -1  10   5    3.14   11.56
   1  10  -4  506.18   25.16
   1  10  -4  510.66   24.46
  -1  10   4  536.57   27.30
  -1  10   4  497.46   25.31
   1  10  -3  154.99   13.10
   1  10  -3  134.07   11.76
  -1  10   3  169.24   14.95
  -1  10   3  175.32   15.20
   1  10  -2   99.84   12.55
  -1  10   2  105.42   13.30
  -1  10   2   93.66   12.80
   1  10  -1  136.76   14.55
   1  10  -1  147.52   14.45
  -1  10   1  195.20   15.20
  -1  10   1  168.09   14.05
   1  10   0   11.86   12.31
   1  10   0   10.41   11.56
   1  10   1  291.60   18.63
   1  10   1  258.47   17.84
  -1  10  -1  306.10   18.58
  -1  10  -1  238.49   15.89
   1  10   2   90.72   13.60
   1  10   2   77.77   13.40
  -1  10  -2   89.53   10.16
  -1  10  -2  120.07   11.51
   1  10   3   55.40   12.90
   1  10   3   75.53   12.60
  -1  10  -3   56.50    9.37
  -1  10  -3   58.59    8.72
   1  10   4  430.15   24.01
   1  10   4  434.93   23.91
   1  10   5    3.69   12.75
   1  10   5   23.22   12.36
   1  10   6  669.09   32.83
   1  10   6  645.68   31.79
   1  10   7   79.21   13.15
   1  10   7   79.31   13.10
   1  10   8  415.95   23.22
   1  10   8  355.77   20.97
   1  10   9  173.92   15.74
   1  10   9  189.77   15.59
   1  10  10   15.79   12.80
   1  10  10    6.33   12.50
   1  10  11   80.61   14.70
   1  10  11  105.42   14.95
   1  10  12  -23.76   14.45
   1  10  12    7.12   12.06
   1  10  13   22.67   12.46
   1  10  13   46.08   15.15
   1  10  14  120.82   14.65
   1  10  14  102.43   15.05
   1  10  15    4.83   13.80
   1  10  15    3.84   13.95
  -1  11  13   74.83   16.29
  -1  11  13   46.68   15.15
  -1  11  12   45.49   15.00
  -1  11  12   34.23   14.75
  -1  11  11   -8.42   12.50
  -1  11  11    3.24   14.45
  -1  11  10   40.60   13.95
  -1  11  10   54.65   14.55
  -1  11   9   95.76   14.25
  -1  11   9  101.43   14.70
  -1  11   8   12.31   13.35
  -1  11   8   -4.78   12.55
  -1  11   7  226.53   17.74
  -1  11   7  285.47   19.68
  -1  11   6   10.21   12.16
  -1  11   6   27.25   12.95
   1  11  -5  414.51   19.68
   1  11  -5  447.34   22.22
  -1  11   5  456.16   24.96
  -1  11   5  410.52   22.92
   1  11  -4   -9.42   11.61
   1  11  -4   19.78    9.76
  -1  11   4   15.84   11.46
  -1  11   4   28.45   12.55
   1  11  -3  182.14   14.80
   1  11  -3  188.72   16.04
  -1  11   3  201.03   15.79
  -1  11   3  202.72   16.19
   1  11  -2   55.65   14.45
   1  11  -2   62.33   13.65
  -1  11   2   82.90   13.75
  -1  11   2   69.30   12.46
   1  11  -1   33.08   12.90
   1  11  -1   -8.82   13.85
  -1  11   1   28.95   12.65
  -1  11   1   41.35   12.75
   1  11   0  177.01   15.79
   1  11   0  180.80   17.49
  -1  11   0  173.67   15.89
  -1  11   0  214.53   16.94
   1  11   1    9.42   11.76
   1  11   1    5.63   12.65
  -1  11  -1   27.20   11.66
   1  11   2   73.73   13.75
   1  11   2   59.98   13.55
  -1  11  -2   62.13   11.91
  -1  11  -2   41.90   11.71
   1  11   3  260.36   18.18
   1  11   3  256.58   18.58
  -1  11  -3  214.83   14.70
  -1  11  -3  256.97   14.90
   1  11   4   -2.94   13.15
   1  11   4    7.17   11.81
   1  11   5  319.85   20.78
   1  11   5  366.68   21.62
   1  11   6   -3.24   13.15
   1  11   6    3.54   12.80
   1  11   7  221.25   17.74
   1  11   7  206.95   16.89
   1  11   8  112.89   15.89
   1  11   8  123.01   15.59
   1  11   9   89.58   14.90
   1  11   9   89.78   14.90
   1  11  10   79.71   15.64
   1  11  10   56.25   13.90
   1  11  11   -0.30   14.35
   1  11  11    4.68   15.49
   1  11  12   -6.13   15.44
   1  11  12   26.01   14.40
   1  11  13    2.24   14.40
   1  11  13   29.19   13.80
  -1  12  11  -16.84   16.09
  -1  12  11    4.43   14.55
  -1  12  10   15.05   14.30
  -1  12  10   45.04   15.10
  -1  12   9  -22.82   14.70
  -1  12   9   -9.52   14.45
  -1  12   8   81.46   14.55
  -1  12   8   90.92   16.59
  -1  12   7    4.09   14.50
  -1  12   7   24.66   13.50
  -1  12   6  132.87   15.94
  -1  12   6  143.13   16.89
  -1  12   5   16.04   13.85
  -1  12   5   14.50   14.85
   1  12  -4  229.92   18.18
   1  12  -4  232.36   15.94
   1  12  -3   18.13   16.49
   1  12  -3   22.52   12.41
  -1  12   3   46.38   15.10
  -1  12   3   41.70   14.45
   1  12  -2   57.74   17.44
   1  12  -2   54.80   14.15
  -1  12   2   75.58   15.25
  -1  12   2   64.82   15.59
   1  12  -1   -8.37   14.70
   1  12  -1   22.07   17.59
  -1  12   1    2.29   14.85
  -1  12   1   31.09   15.25
   1  12   0   -9.37   15.10
   1  12   0    0.60   14.80
  -1  12   0   17.59   14.50
   1  12   1   49.42   15.94
   1  12   1   65.86   16.44
  -1  12  -1   12.65   15.20
  -1  12  -1   50.82   14.15
   1  12   2   53.06   16.19
   1  12   2   73.24   15.29
  -1  12  -2  111.90   16.24
  -1  12  -2   92.57   14.25
   1  12   3   20.38   14.25
   1  12   3   35.42   14.15
   1  12   4   34.92   14.55
   1  12   4   65.41   15.49
   1  12   5    1.00   14.15
   1  12   5   24.66   14.90
   1  12   6  201.67   17.84
   1  12   6  175.82   18.04
   1  12   7   34.58   15.69
   1  12   7   22.22   14.75
   1  12   8   70.30   15.69
   1  12   8   84.79   16.54
   1  12   9    7.22   15.10
   1  12   9   -4.18   15.00
   1  12  10    8.37   15.84
   1  12  10   -5.13   15.39
   1  12  11    5.93   17.04
  -1  13   7   96.05   18.23
  -1  13   7   65.31   18.88
  -1  13   6   27.15   17.24
  -1  13   6   19.33   17.94
  -1  13   5  108.71   18.68
  -1  13   5   92.27   19.23
  -1  13   4   13.70   16.44
  -1  13   4   -2.14   17.04
   1  13  -3   75.58   15.99
   1  13  -3   95.51   14.35
  -1  13   3  129.04   19.38
   1  13  -2  -20.97   18.13
   1  13  -2   -6.68   14.75
  -1  13   2   19.18   18.13
  -1  13   2   -4.33   19.68
   1  13  -1   11.71   18.43
   1  13  -1   -1.99   19.83
  -1  13   1   54.75   19.83
  -1  13   1   38.01   21.57
   1  13   0   13.05   18.58
   1  13   0  -31.24   20.97
  -1  13   0    5.38   16.29
  -1  13   0   12.80   16.49
   1  13   1   21.77   19.98
   1  13   1   20.13   18.53
  -1  13  -1   -4.68   16.19
  -1  13  -1   36.82   15.69
   1  13   2    5.93   17.74
   1  13   2   27.95   17.39
  -1  13  -2   33.28   12.11
  -1  13  -2    1.64   12.85
   1  13   3   16.49   17.69
   1  13   3   63.32   18.78
   1  13   4   28.30   17.79
   1  13   4    2.44   17.64
   1  13   5   72.24   18.93
   1  13   5   74.48   19.13
   1  13   6    4.48   15.54
   1  13   6  -14.00   16.89
   1  13   7   63.77   19.23
   1  13   7   89.03   17.94
  -2   0  23    2.49   12.75
  -2   0  23  -13.90   13.80
  -2   0  22  566.96   28.85
  -2   0  22  591.37   29.84
  -2   0  21   -3.04   11.31
  -2   0  21    0.65   11.56
  -2   0  20  801.12   37.12
  -2   0  20  688.52   33.03
   2   0 -19  -17.44   11.11
  -2   0  19   -6.18    9.81
  -2   0  19   15.00   10.26
   2   0 -18  386.01   21.57
  -2   0  18  406.49   22.47
  -2   0  18  400.21   22.27
   2   0 -17  -22.12    9.81
  -2   0  17    2.64    7.62
  -2   0  17    2.14   10.56
   2   0 -16  150.21   13.25
  -2   0  16  148.42   13.15
  -2   0  16  132.02   12.95
   2   0 -15   16.19    9.12
  -2   0  15   16.29   10.16
  -2   0  15    1.94   10.16
   2   0 -14  236.80   15.39
  -2   0  14  279.74   17.24
  -2   0  14  265.39   15.99
   2   0 -13    6.48   10.26
  -2   0  13   -4.28    9.07
  -2   0  13    2.44    9.32
   2   0 -12 2377.44  101.53
  -2   0  12 2315.16   98.94
  -2   0  12 2419.79  102.28
   2   0 -11   13.90    7.72
  -2   0  11   -2.19    8.52
   2   0 -10 4598.44  192.36
  -2   0  10 4646.77  194.60
   2   0  -9   -3.54    8.52
  -2   0   9    3.54    8.47
   2   0  -8 1715.32   73.68
  -2   0   8 1904.64   81.56
   2   0  -7    5.63    8.47
  -2   0   7   -1.44    7.72
   2   0  -6 1159.82   50.62
  -2   0   6 1281.88   55.55
   2   0  -5    6.38    7.32
  -2   0   5   -1.99    8.22
   2   0  -4  148.61   10.86
  -2   0   4  143.58   10.96
   2   0  -3    4.78    6.63
  -2   0   3   -7.97    7.27
   2   0  -2 1748.70   73.93
  -2   0   2 1890.69   79.66
   2   0  -1   -6.33    5.63
  -2   0   1    0.05    5.38
   2   0   0 3710.64  154.39
  -2   0   0 3692.71  153.55
   2   0   1    0.95    6.38
  -2   0  -1    8.77    6.93
   2   0   2 7672.38  318.10
   2   0   3   -2.44    7.42
  -2   0  -3   11.26    7.77
   2   0   4   41.55    8.42
  -2   0  -4   41.55    8.62
   2   0   5    1.94    7.87
  -2   0  -5    8.32    7.67
   2   0   6 1026.80   44.64
   2   0   6 1059.68   46.18
  -2   0  -6  980.47   42.85
   2   0   7   -5.53    6.93
   2   0   7   -7.07    7.32
  -2   0  -7   -3.24    7.32
   2   0   8  288.41   16.14
   2   0   8  268.93   15.20
  -2   0  -8  305.15   16.59
   2   0   9   -2.29    7.77
   2   0   9    3.64    8.72
  -2   0  -9   -1.30    7.17
   2   0  10  685.53   31.79
   2   0  10  619.77   28.80
   2   0  11    0.05    8.17
   2   0  11   13.30    8.52
   2   0  12 2445.69  103.88
   2   0  12 2246.91   95.31
   2   0  13   -2.69    7.87
   2   0  13    8.32    9.91
   2   0  14  861.90   39.06
   2   0  14  916.70   41.25
   2   0  15    3.09    9.17
   2   0  15   -6.33    9.02
   2   0  16   85.94   12.31
   2   0  16   98.69   12.16
   2   0  17   -2.79    9.67
   2   0  17    1.59   10.16
   2   0  18  629.73   30.64
   2   0  18  582.90   28.20
   2   0  19   12.21   10.21
   2   0  19   -1.05   11.86
   2   0  20  328.87   19.58
   2   0  20  301.41   18.83
   2   0  21   -7.02   12.85
   2   0  21    3.04   11.66
   2   0  22  392.79   23.12
   2   0  22  387.06   23.27
  -2  -1  23  339.88   22.42
  -2  -1  23  318.85   21.02
  -2   1  23  329.07   20.43
  -2   1  23  325.93   21.57
  -2  -1  22    6.23   12.21
  -2  -1  22    6.53   13.10
  -2   1  22   -0.85   12.01
  -2   1  22    0.10   11.91
  -2  -1  21  479.08   25.41
  -2  -1  21  486.35   25.21
  -2   1  21  486.25   25.51
  -2   1  21  529.59   27.75
  -2  -1  20    1.25    9.62
  -2  -1  20    5.98   11.21
  -2   1  20   16.04   11.16
  -2   1  20  -23.32   11.16
   2  -1 -19  579.41   28.85
  -2  -1  19  565.96   28.05
  -2  -1  19  574.43   28.85
   2   1 -19  630.23   30.99
  -2   1  19  592.87   29.89
  -2   1  19  606.32   29.54
   2  -1 -18  141.79   14.00
  -2  -1  18   94.56   11.81
  -2  -1  18  103.98   11.66
   2   1 -18  134.27   13.35
  -2   1  18  137.31   11.86
  -2   1  18  100.94   11.51
   2  -1 -17  218.76   15.84
  -2  -1  17  238.34   15.64
  -2  -1  17  279.59   17.74
   2   1 -17  181.40   14.70
  -2   1  17  247.51   15.99
  -2   1  17  208.05   15.34
   2  -1 -16  161.67   13.70
  -2  -1  16  164.71   12.95
  -2  -1  16  148.81   13.50
   2   1 -16  166.00   13.20
  -2   1  16  139.75   13.50
  -2   1  16  136.16   13.55
   2  -1 -15  253.29   16.69
  -2  -1  15  234.26   14.65
  -2  -1  15  220.11   15.05
   2   1 -15  250.25   15.54
  -2   1  15  215.32   15.59
  -2   1  15  253.54   15.69
   2  -1 -14   45.79   11.01
  -2  -1  14   69.55    9.72
  -2  -1  14   54.50    9.62
   2   1 -14   45.34    9.96
  -2   1  14   82.10   11.06
  -2   1  14   62.52   10.21
   2  -1 -13 1840.87   79.61
  -2  -1  13 1629.63   70.75
  -2  -1  13 1686.93   72.64
   2   1 -13 1649.56   71.44
  -2   1  13 1833.90   79.12
  -2   1  13 1691.91   73.34
   2  -1 -12    0.30   10.21
  -2  -1  12   12.95    7.97
   2   1 -12    8.27    9.22
  -2   1  12    9.91   10.06
  -2   1  12  -10.26    8.47
   2  -1 -11 2432.24  103.63
  -2  -1  11 2363.99  100.59
   2   1 -11 2270.82   96.65
  -2   1  11 2341.57   99.84
  -2   1  11 2425.77  103.13
   2  -1 -10  199.78   13.90
  -2  -1  10  185.43   12.65
   2   1 -10  187.82   13.75
  -2   1  10  169.69   13.30
   2  -1  -9 4310.48  180.60
  -2  -1   9 4504.28  188.37
   2   1  -9 4197.89  175.72
  -2   1   9 4626.34  193.70
   2  -1  -8  195.50   13.00
  -2  -1   8  192.41   12.55
   2   1  -8  171.48   12.21
  -2   1   8  168.84   12.90
   2  -1  -7 1647.07   71.14
  -2  -1   7 1566.86   67.16
   2   1  -7 1566.86   67.21
  -2   1   7 1757.17   75.28
   2  -1  -6    8.27    8.97
  -2  -1   6   17.74    6.97
   2   1  -6   10.61    7.62
  -2   1   6   19.83    8.17
   2  -1  -5   76.42    9.72
  -2  -1   5   88.23    8.72
   2   1  -5  104.52   10.11
  -2   1   5   83.65    8.67
   2  -1  -4  898.27   39.96
  -2  -1   4  870.37   38.36
   2   1  -4  961.04   42.25
  -2   1   4  977.48   43.09
   2  -1  -3 2487.54  104.77
  -2  -1   3 2265.34   95.26
   2   1  -3 2253.39   94.81
  -2   1   3 2362.00   99.44
   2  -1  -2  331.46   17.14
  -2  -1   2  312.87   15.69
   2   1  -2  300.72   15.44
  -2   1   2  349.94   17.29
  -2  -1   1 9999.00  413.81
   2  -1   0  173.97   10.11
  -2  -1   0  161.72   10.76
   2   1   0  178.11   11.21
  -2   1   0  177.21   10.11
   2  -1   1 3620.47  150.56
  -2  -1  -1 3460.04  144.33
   2   1   1 3610.50  150.56
  -2   1  -1 3598.54  149.66
   2  -1   2  365.38   17.19
  -2  -1  -2  394.63   19.53
   2   1   2  397.62   19.83
  -2   1  -2  366.38   17.34
   2  -1   3 5246.11  217.87
  -2  -1  -3 5086.69  211.49
   2   1   3 5276.00  219.61
  -2   1  -3 4725.49  196.24
   2  -1   4  486.35   22.32
  -2  -1  -4  510.16   24.01
   2  -1   5   95.16    8.87
   2  -1   5   89.53    8.22
  -2  -1  -5   71.34    8.77
   2   1   5   87.63    9.52
  -2   1  -5   95.85    8.77
   2  -1   6   95.41    8.62
  -2  -1  -6  116.43   10.86
   2   1   6   93.21   10.41
   2   1   6  101.34   10.21
  -2   1  -6   97.00    8.72
   2  -1   7  522.12   24.31
   2  -1   7  518.13   24.11
   2   1   7  642.69   30.04
   2   1   7  630.73   29.54
   2  -1   8  397.47   19.83
   2  -1   8  352.88   17.84
   2   1   8  410.47   21.37
   2   1   8  414.51   20.68
  -2   1  -8  364.24   18.04
   2  -1   9 1574.83   67.31
   2  -1   9 1525.01   65.27
  -2  -1  -9 1477.68   64.02
   2  -1  10  104.13    9.67
   2  -1  10  113.49    9.52
   2   1  10  118.07   12.06
   2   1  10  118.07   11.71
   2  -1  11 1543.44   66.16
   2  -1  11 1543.44   66.91
   2   1  11 1754.68   75.23
   2   1  11 1585.79   69.15
   2  -1  12   91.77   10.41
   2  -1  12   88.83    9.32
   2   1  12   97.00   11.41
   2   1  12   82.55   10.81
   2  -1  13 1341.67   57.99
   2  -1  13 1293.84   56.25
   2   1  13 1456.76   63.37
   2   1  13 1546.43   66.86
   2  -1  14   -7.07    8.27
   2  -1  14   12.60    9.76
   2   1  14   -6.93    9.57
   2   1  14   -0.80   10.41
   2  -1  15  303.31   17.34
   2  -1  15  346.85   19.78
   2   1  15  330.01   19.38
   2   1  15  289.46   17.69
   2  -1  16    9.47    8.87
   2  -1  16   -5.73    9.52
   2   1  16   19.78    9.67
   2   1  16   -1.64   10.56
   2  -1  17   15.79   10.81
   2  -1  17   -3.04   10.06
   2   1  17    4.43   10.51
   2   1  17   10.26   10.51
   2  -1  18    6.73   11.71
   2  -1  18   -7.27   10.01
   2   1  18    3.89   11.01
   2   1  18    4.98   10.61
   2  -1  19  214.93   16.94
   2  -1  19  190.17   14.95
   2   1  19  193.30   15.15
   2   1  19  234.70   16.34
   2  -1  20    8.17   12.16
   2  -1  20    0.10   11.36
   2   1  20  -14.45   11.76
   2   1  20    1.69   10.91
   2  -1  21  391.09   22.62
   2  -1  21  429.20   24.71
   2   1  21  370.72   21.42
   2   1  21  397.32   22.67
   2  -1  22    5.43   15.20
   2  -1  22   -1.00   14.20
   2   1  22  -13.00   13.60
   2   1  22    0.75   12.90
  -2  -2  22  443.70   25.06
  -2  -2  22  460.24   25.36
  -2   2  22  407.73   24.36
  -2   2  22  432.74   23.42
  -2  -2  21   21.47   11.71
  -2  -2  21   14.05   13.05
  -2   2  21   14.90   11.91
  -2   2  21   15.25   11.86
  -2  -2  20  608.81   29.64
  -2  -2  20  634.71   31.24
  -2   2  20  606.32   30.79
  -2   2  20  590.87   29.19
  -2  -2  19   93.36   12.90
  -2  -2  19   93.91   11.26
   2   2 -19   79.46   12.41
  -2   2  19   70.60   12.01
  -2   2  19   69.10   11.41
   2  -2 -18  354.57   20.28
  -2  -2  18  384.02   20.43
  -2  -2  18  407.33   22.07
  -2   2  18  349.04   20.48
  -2   2  18  333.00   20.13
   2  -2 -17   89.43   12.55
  -2  -2  17   56.99   10.11
  -2  -2  17   75.93   10.26
   2   2 -17   75.53   10.81
  -2   2  17   68.75   11.76
  -2   2  17   81.11   12.21
   2  -2 -16   74.13   11.46
  -2  -2  16   60.38    9.47
  -2   2  16   63.72   10.61
  -2   2  16   55.00   12.90
   2  -2 -15  372.06   21.52
  -2  -2  15  333.80   18.04
  -2  -2  15  298.03   17.89
   2   2 -15  295.88   17.29
  -2   2  15  366.93   21.92
  -2   2  15  367.63   21.57
  -2  -2  14  423.77   21.27
  -2  -2  14  433.69   22.07
   2   2 -14  419.29   21.67
  -2   2  14  460.09   24.96
  -2   2  14  478.48   25.51
   2  -2 -13   13.60   10.21
  -2  -2  13    7.47    7.87
  -2  -2  13   18.78    7.87
   2   2 -13    8.77    9.42
  -2   2  13   -8.92    9.72
  -2   2  13    1.54    9.72
   2  -2 -12 1503.09   65.86
  -2  -2  12 1402.45   60.68
   2   2 -12 1489.64   64.77
  -2   2  12 1526.50   66.26
  -2   2  12 1680.95   72.99
   2  -2 -11   57.44   11.16
  -2  -2  11   78.87    8.77
   2   2 -11   65.61    9.76
  -2   2  11   50.57   10.26
  -2   2  11   74.33   11.21
   2  -2 -10 4942.70  206.91
  -2  -2  10 4894.88  204.21
   2   2 -10 4957.15  206.95
  -2   2  10 5320.84  222.45
  -2   2  10 5061.78  211.64
   2  -2  -9   48.38   10.06
  -2  -2   9   43.59    7.27
   2   2  -9   60.48    8.57
  -2   2   9   49.12    9.37
  -2   2   9   53.31   10.36
   2  -2  -8 2844.76  120.17
  -2  -2   8 2583.20  108.86
   2   2  -8 2677.36  112.84
  -2   2   8 2864.19  121.11
   2  -2  -7  238.64   15.15
  -2  -2   7  225.89   12.95
   2   2  -7  229.72   13.30
  -2   2   7  216.82   13.50
   2  -2  -6   45.88    9.81
  -2  -2   6   46.23    7.27
   2   2  -6   56.60    7.77
  -2   2   6   31.64    8.97
   2  -2  -5   -1.10    7.87
  -2  -2   5   12.36    6.33
   2   2  -5    8.57    6.88
  -2   2   5   12.01    7.52
   2  -2  -4  450.58   21.92
  -2  -2   4  416.70   20.23
   2   2  -4  445.00   21.17
  -2   2   4  435.83   21.72
   2  -2  -3  139.20   10.71
  -2  -2   3  164.66   11.21
   2   2  -3  169.39   11.16
  -2   2   3  166.75   12.11
   2  -2  -2   48.08    8.17
  -2  -2   2   54.01    8.52
   2   2  -2   34.97    8.07
  -2   2   2   48.87    8.67
   2  -2  -1    6.48    6.68
  -2  -2   1    6.28    7.67
   2   2  -1    9.37    8.02
  -2   2   1   15.89    7.07
   2  -2   0 4756.87  197.59
  -2  -2   0 4799.72  199.88
   2   2   0 5530.09  230.07
  -2   2   0 5236.15  217.42
   2  -2   1 1577.82   66.36
  -2  -2  -1 1597.75   68.15
   2   2   1 1497.11   64.27
  -2   2  -1 1698.39   71.34
   2  -2   3 3051.51  127.04
  -2  -2  -3 3265.24  136.86
   2   2   3 3110.30  130.48
  -2   2  -3 2854.22  118.82
   2  -2   4  765.74   32.78
  -2  -2  -4  814.57   36.77
   2   2   4  761.76   34.72
  -2   2  -4  709.45   30.54
   2  -2   5   52.96    5.88
   2  -2   5   45.64    5.83
  -2  -2  -5   37.86    8.67
   2   2   5   48.97    8.57
   2   2   5   52.21    9.96
  -2   2  -5   38.31    5.58
   2  -2   6  140.34    9.27
   2  -2   6  147.37    9.42
  -2  -2  -6  118.37   11.56
   2   2   6  142.09   11.76
   2   2   6  147.97   12.01
  -2   2  -6  132.67    8.72
   2  -2   7  161.07   10.41
   2  -2   7  163.96   10.31
  -2  -2  -7  200.63   13.90
   2  -2   8   79.21    8.17
   2  -2   8   80.61    7.47
  -2  -2  -8   83.50   10.36
   2   2   8   79.81   10.81
   2   2   8   88.58   11.11
   2  -2   9  254.78   14.00
   2  -2   9  246.76   13.45
  -2  -2  -9  278.00   16.54
   2   2   9  275.01   16.54
   2   2   9  263.80   15.99
   2  -2  10 2056.10   87.39
   2  -2  10 1986.85   84.10
   2   2  10 2202.57   93.91
   2   2  10 2248.90   95.71
   2  -2  11    6.93    7.67
   2  -2  11   26.11    7.67
   2   2  11   -2.24   10.31
   2   2  11    5.13    9.76
   2  -2  12 2265.34   96.00
   2  -2  12 2090.47   88.58
   2   2  12 2467.62  105.32
   2   2  12 2317.66   99.09
   2  -2  13   35.32    8.97
   2  -2  13   32.03    8.22
   2   2  13   46.03   10.61
   2   2  13   43.00   10.96
   2  -2  14  856.91   39.36
   2  -2  14  842.47   37.76
   2   2  14  861.40   40.01
   2   2  14  952.07   42.80
   2  -2  15   47.88   10.11
   2  -2  15   42.90    8.67
   2   2  15   38.16    9.32
   2   2  15   65.76   11.86
   2  -2  16   94.86   11.61
   2  -2  16   95.21   11.91
   2   2  16  121.61   11.96
   2   2  16   91.37   12.60
   2  -2  17   42.20   10.06
   2  -2  17   54.16   11.06
   2   2  17   39.71   10.76
   2   2  17   30.44   10.61
   2  -2  18  164.51   13.35
   2  -2  18  162.42   14.35
   2   2  18  172.78   14.80
   2   2  18  168.69   13.25
   2  -2  19    3.14   11.81
   2  -2  19    8.97   11.31
   2   2  19   -6.73    9.42
   2   2  19   19.68   11.46
   2  -2  20  114.44   15.44
   2  -2  20  118.17   14.50
   2   2  20  108.41   13.05
   2   2  20  108.21   11.86
   2  -2  21   25.36   14.70
   2  -2  21   -7.12   14.40
   2   2  21   17.79   11.76
   2   2  21   16.29   12.85
   2  -2  22  300.97   21.07
   2  -2  22  307.99   22.22
   2   2  22  267.09   18.83
   2   2  22  309.49   18.93
  -2  -3  22   14.80   13.20
  -2  -3  22   25.11   15.89
  -2   3  22    8.27   12.21
  -2   3  22   -5.18   13.25
  -2  -3  21  648.17   32.03
  -2  -3  21  574.93   29.34
  -2   3  21  672.58   33.48
  -2   3  21  613.79   31.04
  -2  -3  20    3.09   10.81
  -2  -3  20   10.46   12.90
  -2   3  20   18.88   11.96
  -2   3  20   26.75   12.90
  -2  -3  19  845.95   39.36
  -2  -3  19  831.51   37.86
  -2   3  19  786.17   37.02
  -2   3  19  838.48   39.06
   2  -3 -18   40.85   12.55
  -2  -3  18   32.13   11.76
  -2  -3  18   34.48    8.97
   2   3 -18   43.39   11.31
  -2   3  18   51.07   12.65
  -2   3  18   50.42   13.10
  -2  -3  17  334.05   18.63
  -2  -3  17  317.56   17.59
  -2   3  17  228.88   16.69
  -2   3  17  215.62   15.94
   2  -3 -16  234.90   16.74
  -2  -3  16  218.21   14.10
  -2  -3  16  238.74   15.54
   2   3 -16  289.76   17.44
  -2   3  16  290.16   18.93
  -2   3  16  243.03   16.84
   2  -3 -15  265.20   17.69
  -2  -3  15  247.61   14.60
   2   3 -15  296.33   17.09
  -2   3  15  244.92   16.64
  -2   3  15  281.19   18.83
   2  -3 -14    4.83   11.46
  -2  -3  14   14.10    7.37
  -2  -3  14   13.95    9.37
   2   3 -14   17.09    9.07
  -2   3  14   31.04   12.41
  -2   3  14   42.90    9.81
   2  -3 -13  954.07   43.89
  -2  -3  13  836.49   37.47
   2   3 -13  867.88   39.51
  -2   3  13 1007.87   45.93
  -2   3  13  986.45   44.74
   2  -3 -12   38.36   10.66
  -2  -3  12   36.92    7.97
   2   3 -12   12.75    9.47
  -2   3  12   20.48   11.01
  -2   3  12   35.37   10.66
   2  -3 -11 2813.37  119.17
  -2  -3  11 2632.52  111.20
   2   3 -11 2644.98  111.95
  -2   3  11 2730.67  116.08
  -2   3  11 2810.88  119.52
   2  -3 -10   25.56   10.56
  -2  -3  10   34.63    7.37
   2   3 -10   26.90    8.22
  -2   3  10   26.80   10.06
  -2   3  10   40.50   10.21
   2  -3  -9 2589.18  109.85
  -2  -3   9 2206.56   93.36
  -2   3   9 2511.96  106.37
  -2   3   9 2576.22  109.51
   2  -3  -8  181.90   13.15
  -2  -3   8  188.52   11.21
   2   3  -8  203.52   12.85
  -2   3   8  195.20   14.00
  -2   3   8  197.39   13.85
   2  -3  -7 1237.05   54.25
  -2  -3   7 1230.07   53.01
   2   3  -7 1162.81   50.32
  -2   3   7 1235.55   54.25
  -2   3   7 1299.82   56.65
   2  -3  -6  401.35   20.87
  -2  -3   6  417.55   19.93
   2   3  -6  422.43   20.33
  -2   3   6  421.03   21.07
   2  -3  -5  177.71   12.06
  -2  -3   5  205.46   11.86
   2   3  -5  190.36   11.36
  -2   3   5  197.09   13.40
   2  -3  -4  305.05   16.54
  -2  -3   4  339.83   16.94
   2   3  -4  338.03   16.84
  -2   3   4  357.66   18.38
   2  -3  -3 1359.60   58.49
  -2  -3   3 1352.13   57.84
   2   3  -3 1421.88   60.73
  -2   3   3 1481.17   63.52
   2  -3  -2  -13.90    7.42
  -2  -3   2   -0.15    7.47
   2   3  -2    5.93    7.07
  -2   3   2    4.78    7.22
   2  -3  -1 1005.38   43.64
  -2  -3   1  971.00   42.70
   2   3  -1 1006.38   44.14
  -2   3   1 1040.25   45.14
   2  -3   0    6.28    5.63
  -2  -3   0    1.59    8.07
   2   3   0    8.42    8.37
  -2   3   0    9.12    6.08
   2  -3   1 1731.77   72.54
  -2  -3  -1 1761.66   75.18
   2   3   1 1978.38   84.05
  -2   3  -1 1850.84   77.62
   2  -3   2  138.35    7.32
  -2  -3  -2  118.87   10.26
   2   3   2  131.93   11.81
  -2   3  -2  157.83    8.22
   2  -3   3 7687.32  322.99
  -2  -3  -3 8060.98  334.65
   2   3   3 8140.69  338.18
  -2   3  -3 7881.62  331.01
   2  -3   4   48.18    3.04
   2  -3   4   40.40    2.69
  -2  -3  -4   47.48    9.96
   2   3   4   61.53   10.21
  -2   3  -4   46.23    3.39
   2  -3   5 1057.69   44.74
   2  -3   5 1023.32   43.24
  -2  -3  -5 1090.57   48.03
   2   3   5 1011.86   44.69
   2   3   5 1010.36   44.79
   2  -3   6   67.26    5.18
   2  -3   6   74.03    5.63
  -2  -3  -6   88.78   11.11
   2   3   6   73.49   10.36
   2   3   6   66.41    9.42
   2  -3   7 1142.89   48.48
   2  -3   7 1110.00   47.03
  -2  -3  -7 1206.66   52.96
   2   3   7 1122.96   49.82
   2   3   7 1176.76   51.71
   2  -3   8  154.05    9.32
   2  -3   8  158.98    9.27
  -2  -3  -8  169.04   13.05
   2   3   8  153.15   12.16
   2   3   8  137.75   11.31
   2  -3   9 1200.18   51.41
   2  -3   9 1181.75   50.67
  -2  -3  -9 1228.58   54.11
   2   3   9 1171.78   52.26
   2   3   9 1240.53   55.05
   2  -3  10   18.08    6.18
   2  -3  10   32.03    6.97
  -2  -3 -10   28.45   10.56
   2   3  10   23.76   10.96
   2   3  10   26.11   10.96
   2  -3  11 1739.24   73.63
   2  -3  11 1806.99   76.97
   2   3  11 1847.35   79.96
   2   3  11 1960.94   84.10
   2  -3  12   26.70    8.57
   2  -3  12   32.63    7.77
   2   3  12   18.28   10.51
   2   3  12   -0.50   10.26
   2  -3  13 1124.45   49.62
   2  -3  13 1079.61   47.23
   2   3  13 1167.80   52.56
   2   3  13 1137.40   51.22
   2  -3  14   13.65    7.92
   2  -3  14   15.15    8.32
   2   3  14   48.48   12.26
   2   3  14   34.03   12.16
   2  -3  15  271.27   16.19
   2  -3  15  264.60   16.19
   2   3  15  286.12   18.58
   2   3  15  301.71   19.58
   2  -3  16  107.66   11.51
   2  -3  16  105.02   11.26
   2   3  16   81.41   11.96
   2   3  16  105.07   13.55
   2  -3  17   23.86   11.56
   2  -3  17   -9.47    9.91
   2   3  17   32.83   10.56
   2   3  17   23.91   11.66
   2  -3  18   14.60   11.56
   2  -3  18   30.14   11.21
   2   3  18   14.45   11.56
   2   3  18    2.19   10.66
   2  -3  19  265.49   17.59
   2  -3  19  238.04   17.34
   2   3  19  245.32   16.79
   2   3  19  258.52   17.74
   2  -3  20   -0.30   13.55
   2  -3  20   -2.99   14.50
   2   3  20    1.10   11.86
   2   3  20   25.81   11.56
   2  -3  21  376.39   24.16
   2  -3  21  362.59   23.12
   2   3  21  411.22   22.22
   2   3  21  384.62   21.97
  -2  -4  22  349.39   21.27
  -2  -4  22  367.73   23.86
  -2   4  22  362.30   21.97
  -2   4  22  373.85   22.82
  -2  -4  21   -6.03   15.94
  -2  -4  21   16.14   12.36
  -2   4  21    7.67   13.40
  -2   4  21    3.39   11.91
  -2  -4  20  642.19   32.43
  -2  -4  20  601.33   29.69
  -2  -4  19   52.66   12.50
  -2  -4  19   10.16   10.06
  -2   4  19    8.62   12.65
  -2   4  19   19.88   10.76
  -2  -4  18  290.01   17.49
  -2  -4  18  291.40   18.18
   2   4 -18  288.01   17.99
  -2   4  18  234.80   16.44
  -2   4  18  237.94   16.29
   2  -4 -17   -5.53   12.41
  -2  -4  17   19.93    9.07
  -2  -4  17   13.35   10.51
   2   4 -17    3.09   10.56
  -2   4  17   37.17   11.96
  -2   4  17    0.90   12.41
  -2  -4  16   51.41    9.76
  -2  -4  16   51.76    9.91
  -2   4  16   -4.14   11.26
  -2   4  16    2.84   11.86
   2  -4 -15   43.79   13.30
  -2  -4  15   31.44    7.72
  -2  -4  15   59.73   10.71
   2   4 -15   55.95    9.57
  -2   4  15   71.79   12.85
  -2   4  15   64.37   12.85
   2  -4 -14  313.12   19.68
  -2  -4  14  264.10   14.85
  -2  -4  14  260.06   14.40
   2   4 -14  291.50   17.19
  -2   4  14  323.19   20.03
  -2   4  14  312.03   19.33
   2  -4 -13   -1.25    9.86
  -2  -4  13   16.29    7.82
  -2  -4  13   13.55    6.48
   2   4 -13   -3.24    8.47
  -2   4  13    8.82    9.76
  -2   4  13   21.82   10.36
   2   4 -12 1958.45   83.75
  -2   4  12 2202.57   94.41
  -2   4  12 2201.57   94.11
   2  -4 -11  149.91   13.00
  -2  -4  11  158.38   10.41
   2   4 -11  170.44   12.11
  -2   4  11  158.38   12.65
  -2   4  11  166.75   13.35
   2  -4 -10 2369.47  100.79
  -2  -4  10 2047.13   86.69
  -2   4  10 2446.69  104.32
  -2   4  10 2491.03  106.12
   2  -4  -9    0.55    9.81
  -2  -4   9    3.99    5.73
   2   4  -9   -5.83    6.97
  -2   4   9    4.93    9.37
  -2   4   9    8.22    9.62
   2  -4  -8 1637.11   70.84
  -2  -4   8 1407.43   59.93
   2   4  -8 1407.43   60.28
  -2   4   8 1642.59   71.29
  -2   4   8 1573.83   68.20
   2  -4  -7  232.96   15.79
  -2  -4   7  211.49   11.56
   2   4  -7  219.11   12.31
  -2   4   7  227.93   15.44
  -2   4   7  229.17   15.00
   2  -4  -6   18.04    9.12
  -2  -4   6   16.44    5.78
   2   4  -6   10.96    6.03
  -2   4   6   18.63    9.62
  -2   4   6   27.75    8.97
   2  -4  -5 1165.80   50.92
  -2  -4   5 1210.64   52.11
   2   4  -5 1187.23   51.12
  -2   4   5 1177.26   51.81
  -2   4   5 1181.25   51.71
   2  -4  -4  555.00   26.16
  -2  -4   4  526.11   24.51
   2   4  -4  567.46   26.06
  -2   4   4  555.00   26.45
  -2   4   4  549.52   26.31
   2  -4  -3  200.33   12.16
  -2  -4   3  203.07   12.01
   2   4  -3  208.60   12.41
  -2   4   3  206.76   13.10
  -2   4   3  179.11   12.01
   2  -4  -2 1432.84   61.08
  -2  -4   2 1359.60   58.24
   2   4  -2 1407.93   60.43
  -2   4   2 1429.85   61.23
  -2   4   2 1417.90   60.73
   2  -4  -1   22.07    6.53
  -2  -4   1   23.96    7.92
   2   4  -1   24.51    7.72
  -2   4   1   27.35    7.22
  -2   4   1   20.97    6.63
   2  -4   0 3940.31  164.31
  -2  -4   0 4075.83  170.44
   2   4   0 4408.13  184.14
  -2   4   0 4321.44  179.90
  -2   4   0 3904.44  162.66
   2  -4   1    5.83    5.03
  -2  -4  -1    0.40    8.12
   2   4   1   14.60    8.07
  -2   4  -1    1.54    5.73
  -2   4  -1    8.12    5.68
   2  -4   2 4215.82  175.37
  -2  -4  -2 4491.83  187.67
   2   4   2 4866.48  203.27
  -2   4  -2 4535.67  188.62
  -2   4  -2 4337.38  180.40
  -2  -4  -3  157.68   12.01
   2   4   3  203.32   13.80
  -2  -4  -4 1304.30   57.09
   2   4   4 1231.57   53.86
   2   4   4 1193.20   52.36
  -2  -4  -5  704.46   32.98
   2   4   5  630.23   29.99
   2   4   5  683.54   31.69
  -2  -4  -6  115.68   11.46
   2   4   6  122.81   11.96
   2   4   6  111.55   10.86
  -2  -4  -7   42.10    9.37
   2   4   7   74.88   10.26
   2   4   7   80.56   10.91
   2  -4   8 1108.51   46.98
   2  -4   8 1118.47   47.48
  -2  -4  -8 1171.78   52.16
   2   4   8 1170.29   52.16
   2   4   8 1263.95   55.95
   2  -4   9   35.47    4.93
   2  -4   9   37.17    4.14
  -2  -4  -9   25.71   10.86
   2   4   9   35.17    9.37
   2   4   9   33.08   11.16
   2  -4  10 1616.68   67.91
   2  -4  10 1782.58   75.03
  -2  -4 -10 1841.37   79.91
   2   4  10 1902.65   82.50
   2   4  10 1854.32   80.26
   2  -4  11    6.78    6.13
   2  -4  11    6.78    5.73
   2   4  11   10.91    9.42
   2   4  11   14.70   11.41
   2  -4  12 1414.91   60.43
   2  -4  12 1321.24   56.55
   2   4  12 1564.87   68.65
   2   4  12 1624.65   71.24
   2  -4  13   19.03    6.63
   2  -4  13   22.27    7.57
   2   4  13   19.73   12.46
   2   4  13    7.17   10.96
   2  -4  14 1106.02   47.78
   2  -4  14 1113.49   48.72
   2   4  14 1173.28   52.06
   2   4  14 1089.08   49.27
   2  -4  15   61.93    8.97
   2  -4  15   44.99    9.02
   2   4  15   50.12   11.61
   2   4  15   58.04   11.76
   2  -4  16  102.53   11.51
   2  -4  16   93.02   10.21
   2   4  16  129.04   14.15
   2   4  16  112.64   13.50
   2  -4  17   32.23   11.06
   2  -4  17   40.06    8.97
   2   4  17   22.17   12.21
   2   4  17   46.58   12.21
   2   4  18   -9.96   12.50
   2   4  18   36.72   12.85
   2  -4  19   33.93   12.41
   2  -4  19   63.77   14.35
   2   4  19   35.92   13.10
   2   4  19   32.88   13.40
   2  -4  20  342.37   23.22
   2  -4  20  306.90   20.83
   2   4  20  322.59   19.88
   2   4  20  329.26   20.13
   2  -4  21    6.48   17.84
   2  -4  21   22.72   16.04
   2   4  21    5.93   11.21
   2   4  21   -8.82   14.05
  -2  -5  21  274.06   23.12
  -2  -5  21  297.93   20.78
  -2   5  21  299.27   20.03
  -2   5  21  301.12   20.92
  -2  -5  20   -8.97   12.41
  -2  -5  20   29.15   16.34
  -2   5  20   12.60   11.51
  -2   5  20   -8.67   11.36
  -2  -5  19  283.58   18.28
  -2  -5  19  296.23   20.63
  -2   5  19  292.95   20.13
  -2   5  19  321.99   19.88
  -2  -5  18   19.23   10.51
  -2  -5  18   18.08   12.50
  -2   5  18    9.17   12.70
  -2   5  18    7.82   11.91
  -2  -5  17   75.58    9.81
  -2  -5  17   90.72   12.26
   2   5 -17  114.64   12.50
  -2   5  17   92.37   11.76
  -2   5  17   77.32   12.21
  -2  -5  16   82.95   11.51
  -2  -5  16   94.61    9.42
   2   5 -16   92.32   11.76
  -2   5  16  104.47   13.35
  -2   5  16   89.43   14.05
   2  -5 -15  240.19   16.74
  -2  -5  15  228.68   14.35
  -2   5  15  287.51   18.83
  -2   5  15  267.54   16.89
   2  -5 -14  105.07   13.05
  -2  -5  14   83.45   10.01
  -2  -5  14  110.95    9.62
   2   5 -14   90.97   10.11
  -2   5  14   86.99   11.06
  -2   5  14   90.42   12.85
  -2  -5  13  351.93   17.84
  -2  -5  13  336.49   17.49
  -2   5  13  495.32   26.26
  -2   5  13  458.40   24.71
   2  -5 -12  284.72   18.28
  -2  -5  12  268.78   14.25
   2   5 -12  295.93   16.69
  -2   5  12  332.50   20.43
  -2   5  12  314.07   19.83
  -2   5  11 1522.52   66.86
  -2   5  11 1571.84   68.80
   2  -5 -10   47.48   11.21
  -2  -5  10   52.26    6.33
   2   5 -10   50.17    7.57
  -2   5  10   66.31   11.21
  -2   5  10   58.69   11.11
   2  -5  -9 1635.11   70.99
  -2  -5   9 1430.85   61.08
  -2   5   9 1664.51   72.34
  -2   5   9 1693.40   73.39
   2  -5  -8   43.14    8.62
  -2  -5   8   50.97    6.97
   2   5  -8   43.74    6.83
  -2   5   8   59.78   10.81
  -2   5   8   26.11    8.62
   2  -5  -7  731.37   33.83
  -2  -5   7  684.04   30.39
   2   5  -7  663.11   29.49
  -2   5   7  730.87   34.18
  -2   5   7  761.26   35.37
   2  -5  -6  685.53   32.38
  -2  -5   6  732.86   32.23
   2   5  -6  664.11   29.59
  -2   5   6  755.78   34.97
  -2   5   6  695.50   32.53
   2  -5  -5   95.26   11.16
  -2  -5   5   99.39    8.17
  -2   5   5  136.71   11.76
  -2   5   5  121.36   11.21
   2  -5  -4  636.21   29.94
  -2  -5   4  681.55   30.54
   2   5  -4  725.89   32.58
  -2   5   4  661.62   30.69
  -2   5   4  672.58   31.34
   2  -5  -3 1731.27   74.18
  -2  -5   3 1685.93   71.79
   2   5  -3 1662.51   70.99
  -2   5   3 1750.20   74.83
  -2   5   3 1758.67   75.13
   2  -5  -2  166.25   11.31
  -2  -5   2  185.38   11.86
   2   5  -2  183.84   11.81
  -2   5   2  187.48   12.36
  -2   5   2  186.18   11.76
   2  -5  -1 1158.83   49.92
  -2  -5   1 1214.13   52.71
   2   5  -1 1402.45   60.63
  -2   5   1 1272.92   54.85
  -2   5   1 1253.49   54.01
   2  -5   0   -6.38    5.88
  -2  -5   0   15.79    9.42
   2   5   0   18.73    8.22
  -2   5   0    5.53    6.18
  -2   5   0    7.97    6.58
  -2  -5  -1 4921.78  205.51
   2   5   1 5335.79  222.75
  -2   5  -1 5166.40  214.88
  -2   5  -1 5096.65  211.94
  -2  -5  -2  192.81   13.65
   2   5   2  223.00   14.55
  -2   5  -2  214.08   10.86
  -2   5  -2  228.58   11.61
  -2  -5  -3 1359.60   59.54
   2   5   3 1424.87   61.93
   2   5   3 1359.11   59.29
  -2   5  -3 1394.48   59.09
  -2   5  -3 1412.91   59.83
  -2  -5  -4  612.30   29.59
   2   5   4  649.16   30.84
   2   5   4  622.26   29.54
  -2  -5  -5   47.38   10.96
   2   5   5   65.07   10.81
   2   5   5   46.68    9.02
  -2  -5  -6   40.90    9.12
   2   5   6   43.00   10.66
   2   5   6   55.10    9.81
  -2  -5  -7  305.60   18.63
   2   5   7  342.42   19.83
   2   5   7  286.52   17.69
  -2  -5  -8   25.86    9.67
   2   5   8   29.89   10.71
   2   5   8   20.92    9.57
  -2  -5  -9 1372.56   60.88
   2   5   9 1311.28   58.59
   2   5   9 1411.92   62.52
  -2  -5 -10   58.74   11.11
   2   5  10   78.32   12.95
   2   5  10   36.32   12.11
   2   5  11 2119.37   91.37
   2   5  11 2041.65   87.93
   2  -5  12   21.22    3.54
   2  -5  12   17.59    3.49
   2   5  12   -9.27   10.91
   2   5  12   14.85   11.26
   2  -5  13  842.97   36.37
   2  -5  13  933.64   39.86
   2   5  13 1051.71   47.73
   2   5  13 1025.81   47.03
   2   5  14    8.67   11.16
   2   5  14    7.12   10.91
   2   5  15  393.23   21.97
   2   5  15  386.36   22.47
   2  -5  16   71.89    8.67
   2  -5  16   50.17    8.57
   2   5  16   65.51   13.30
   2   5  16   66.26   11.51
   2  -5  17    5.38    9.22
   2  -5  17   -2.99    9.86
   2   5  17   10.76   10.81
   2   5  17    5.48   10.81
   2  -5  18   11.71   11.61
   2  -5  18    4.78   10.91
   2   5  18    1.79   11.26
   2   5  18    0.15   12.70
   2  -5  19   53.56   13.35
   2  -5  19   49.52   14.40
   2   5  19   79.56   14.70
   2   5  19   65.56   11.76
   2  -5  20  -10.86   14.05
   2  -5  20   10.01   15.49
   2   5  20   -7.47   12.90
   2   5  20   -7.02   11.61
  -2  -6  20  298.38   21.42
  -2  -6  20  275.61   23.81
  -2   6  20  278.00   19.18
  -2   6  20  297.58   20.03
  -2  -6  19    1.44   15.25
  -2  -6  19   -1.94   12.65
  -2   6  19    7.57   12.06
  -2   6  19    7.92   13.15
  -2  -6  18  240.58   18.43
  -2  -6  18  248.01   16.29
  -2   6  18  297.08   19.83
  -2   6  18  243.92   17.34
  -2  -6  17   41.80    9.96
  -2  -6  17   33.13   12.70
  -2   6  17   53.81   14.30
  -2   6  17   14.50   11.31
  -2  -6  16   40.80   11.31
  -2  -6  16    3.34    8.62
  -2   6  16   51.12   11.76
  -2   6  16   39.21   12.26
  -2  -6  15  166.70   11.91
  -2  -6  15  144.53   13.00
   2   6 -15  146.32   13.10
  -2   6  15  134.91   14.80
  -2   6  15  143.48   14.95
  -2  -6  14  378.04   19.38
  -2  -6  14  361.85   17.99
  -2   6  14  403.35   22.07
  -2   6  14  450.38   24.21
   2  -6 -13  107.66   13.90
  -2  -6  13   97.50   10.26
  -2  -6  13   93.91    8.32
   2   6 -13   91.12   10.56
  -2   6  13   92.72   11.86
  -2   6  13   95.56   12.90
  -2  -6  12 1036.77   44.74
  -2  -6  12 1113.49   48.18
   2   6 -12 1177.76   50.97
  -2   6  12 1310.78   58.09
  -2   6  12 1345.66   59.29
   2  -6 -11   45.29   11.01
  -2  -6  11   38.71    6.13
   2   6 -11   27.95    8.62
  -2   6  11   22.77    9.91
  -2   6  11   27.05   10.51
   2  -6 -10 1362.10   59.78
  -2  -6  10 1135.91   48.82
   2   6 -10 1224.09   52.71
  -2   6  10 1276.40   56.90
  -2   6  10 1368.57   60.68
   2  -6  -9    0.35    9.81
  -2  -6   9    4.58    6.13
   2   6  -9    1.10    5.78
  -2   6   9   10.11    9.76
  -2   6   9   13.05    9.81
   2  -6  -8 1052.21   47.58
  -2  -6   8 1068.65   45.83
   2   6  -8 1013.35   43.69
  -2   6   8 1107.51   49.52
  -2   6   8 1020.33   45.79
   2  -6  -7   35.67    9.32
  -2  -6   7   44.44    6.63
   2   6  -7   23.47    6.08
  -2   6   7   49.02   10.26
  -2   6   7   30.69    9.52
   2  -6  -6  240.48   15.10
  -2  -6   6  211.19   12.46
   2   6  -6  214.43   11.76
  -2   6   6  230.72   15.00
  -2   6   6  210.44   14.25
   2  -6  -5  855.42   38.41
  -2  -6   5  909.23   39.96
   2   6  -5  860.90   37.76
  -2   6   5  870.86   39.41
  -2   6   5  944.60   42.40
   2  -6  -4  361.40   18.98
  -2  -6   4  323.29   16.59
   2   6  -4  302.01   15.59
  -2   6   4  305.25   17.09
  -2   6   4  293.29   16.69
   2  -6  -3  556.50   26.11
  -2  -6   3  565.96   26.01
   2   6  -3  576.42   26.80
  -2   6   3  539.56   25.86
  -2   6   3  552.51   26.45
   2  -6  -2  894.28   39.51
  -2  -6   2  814.57   36.77
   2   6  -2  862.89   38.56
  -2   6   2  833.50   37.42
  -2   6   2  810.08   36.52
  -2  -6   1    4.63    7.87
   2   6  -1    3.69    8.17
  -2   6   1   15.69    7.57
  -2   6   1    6.97    6.53
  -2  -6   0 2011.26   85.69
   2   6   0 2223.49   94.46
  -2   6   0 2014.25   85.09
  -2   6   0 1945.50   82.35
  -2  -6  -1   17.69    9.02
   2   6   1   30.14    9.02
  -2   6  -1   24.26    5.93
  -2   6  -1   32.83    6.73
  -2  -6  -2 1145.38   50.77
   2   6   2 1268.43   55.60
   2   6   2 1167.30   51.41
  -2   6  -2 1289.86   54.80
  -2   6  -2 1292.35   54.90
  -2  -6  -3   15.94    9.42
   2   6   3   16.99    9.07
   2   6   3   27.40    9.07
  -2   6  -3   39.76    4.48
  -2   6  -3   24.56    3.59
  -2  -6  -4  287.12   17.84
   2   6   4  322.34   18.78
   2   6   4  302.21   17.59
  -2  -6  -5  317.96   18.58
   2   6   5  309.73   18.18
   2   6   5  327.82   18.43
  -2  -6  -6   68.50   11.11
   2   6   6   85.74   11.46
   2   6   6   80.16   10.91
  -2  -6  -7  317.51   19.08
   2   6   7  313.37   18.93
   2   6   7  354.92   20.53
  -2  -6  -8  474.89   25.01
   2   6   8  425.72   23.61
   2   6   8  453.92   24.46
  -2  -6  -9   16.34   12.41
   2   6   9   51.17   12.80
   2   6   9   40.11   12.85
   2   6  10  851.93   40.45
   2   6  10  880.33   41.05
   2   6  11   31.04   12.31
   2   6  11   39.71   12.31
   2   6  12  832.00   39.21
   2   6  12  834.00   39.16
   2   6  13    4.23   12.26
   2   6  13    3.14   11.71
   2   6  14  650.66   31.84
   2   6  14  633.72   31.64
   2   6  15   34.92   10.81
   2   6  15   16.99   12.80
   2   6  16  -13.70   11.66
   2   6  16  -12.75   12.50
   2   6  17   67.36   13.25
   2   6  17   75.78   13.80
   2   6  18   22.87   12.16
   2   6  18   38.21   13.25
   2   6  19    3.74   10.76
   2   6  19    5.23   11.41
   2   6  20  139.95   13.70
   2   6  20  141.59   13.95
  -2   7  19  273.27   19.58
  -2   7  19  234.11   17.39
  -2   7  18   56.25   13.65
  -2   7  18   73.44   12.55
  -2   7  17   57.34   13.75
  -2   7  17   53.41   13.85
  -2  -7  16   42.70    7.02
  -2  -7  16   23.02    7.72
  -2   7  16   27.20   13.35
  -2   7  16   36.22   14.10
  -2  -7  15  129.78    8.92
  -2  -7  15  135.66    9.62
  -2   7  15  171.38   15.10
  -2   7  15  167.10   15.89
  -2   7  14   23.71   12.90
  -2   7  14   38.11   12.75
  -2  -7  13  574.43   25.46
  -2  -7  13  574.43   25.66
   2   7 -13  571.94   25.86
  -2   7  13  620.27   30.39
  -2   7  13  662.12   32.38
  -2  -7  12   39.86    6.18
  -2  -7  12   53.56    6.63
   2   7 -12   39.66    6.88
  -2   7  12   49.82   10.86
  -2   7  12   27.40   12.06
  -2  -7  11 1367.08   57.99
  -2  -7  11 1271.92   54.25
  -2   7  11 1624.15   70.60
  -2   7  11 1588.28   69.45
  -2  -7  10    3.44    6.28
   2   7 -10    6.97    6.63
  -2   7  10    5.78    9.86
  -2   7  10   -9.72   10.81
  -2  -7   9 1323.24   56.35
   2   7  -9 1320.25   56.35
  -2   7   9 1434.34   63.02
  -2   7   9 1315.26   58.14
  -2  -7   8   93.02    7.97
   2   7  -8   90.42    8.77
  -2   7   8   79.36   12.55
  -2   7   8   69.60   12.31
  -2  -7   7  254.23   14.15
   2   7  -7  223.45   12.21
  -2   7   7  263.40   16.49
  -2   7   7  224.14   14.75
  -2  -7   6  314.27   16.04
   2   7  -6  253.99   13.90
  -2   7   6  244.72   15.44
  -2  -7   5   -1.59    7.37
   2   7  -5    7.37    6.73
  -2   7   5    2.34    7.92
  -2   7   5    2.54    8.12
  -2  -7   4  418.74   21.22
   2   7  -4  380.83   19.03
  -2   7   4  338.48   17.99
  -2   7   4  348.74   18.73
  -2  -7   3  387.21   19.68
   2   7  -3  384.96   20.08
  -2   7   3  373.56   19.18
  -2   7   3  386.71   19.93
  -2  -7   2  108.91   10.61
   2   7  -2  112.10   10.46
  -2   7   2   93.76    9.72
  -2   7   2   77.02    8.67
  -2  -7   1 1083.10   48.33
   2   7  -1 1117.97   49.37
   2   7  -1 1061.18   46.63
  -2   7   1 1024.81   44.99
  -2   7   1 1070.65   47.18
  -2  -7   0    8.32    8.82
   2   7   0    0.10    8.57
   2   7   0   16.24    8.17
  -2   7   0    2.79    6.88
  -2   7   0    5.18    7.87
  -2  -7  -1 1678.46   72.49
   2   7   1 1758.17   75.53
   2   7   1 1645.08   70.94
  -2   7  -1 1805.50   76.52
  -2   7  -1 1796.03   76.03
  -2  -7  -2  144.53   11.86
   2   7   2  198.14   13.35
   2   7   2  150.86   12.06
  -2   7  -2  195.15   11.21
  -2   7  -2  171.18    9.81
  -2  -7  -3 1019.83   45.83
   2   7   3  996.91   44.94
   2   7   3 1087.58   48.23
  -2   7  -3 1045.73   44.44
  -2   7  -3 1022.82   43.64
  -2  -7  -4  387.36   21.42
   2   7   4  465.32   24.31
   2   7   4  418.59   22.07
  -2  -7  -5   22.02    8.67
   2   7   5   24.76    8.62
   2   7   5   31.64   10.31
  -2  -7  -6  117.33   11.81
   2   7   6  152.65   13.90
   2   7   6  177.11   13.55
  -2  -7  -7   49.77   11.41
   2   7   7   50.92   11.26
   2   7   7   50.47   11.66
  -2  -7  -8  323.93   20.58
   2   7   8  306.80   19.83
   2   7   8  302.96   19.68
   2   7   9  241.63   16.69
   2   7   9  248.31   18.28
   2   7  10  267.74   18.23
   2   7  10  254.33   18.43
   2   7  11 1382.02   61.58
   2   7  11 1490.63   65.56
   2   7  12   -3.99   11.86
   2   7  12    9.72   10.91
   2   7  13  611.30   30.29
   2   7  13  656.14   32.58
   2   7  14   73.09   12.60
   2   7  14   63.62   13.45
   2   7  15   59.83   11.41
   2   7  15   81.31   14.10
   2   7  16   46.28   12.11
   2   7  16   69.65   12.65
   2   7  17  -15.59   12.01
   2   7  17   -7.67   12.11
   2   7  18   71.94   13.50
   2   7  18   63.67   14.95
   2   7  19  102.58   14.65
   2   7  19  129.78   16.04
  -2   8  18  157.93   16.04
  -2   8  18  156.98   15.39
  -2   8  17  271.57   18.43
  -2   8  17  250.95   18.58
  -2   8  16    8.92   11.71
  -2   8  16  -13.85   12.55
  -2   8  15   91.92   13.50
  -2   8  15   70.70   14.10
  -2   8  14  349.39   20.92
  -2   8  14  388.50   22.57
  -2   8  13   32.03   11.16
  -2   8  13   11.56   11.31
  -2   8  12  981.96   44.94
  -2   8  12 1176.27   52.76
  -2   8  11   67.46   11.16
  -2   8  11   34.97   12.21
  -2   8  10 1279.89   56.80
  -2   8  10 1201.18   53.76
  -2  -8   9    3.39    4.48
   2   8  -9    4.98    4.18
   2   8  -9    0.20    4.88
  -2   8   9   -6.73   10.46
  -2   8   9  -16.94   11.26
  -2  -8   8  480.37   22.17
   2   8  -8  508.67   23.47
  -2   8   8  528.10   27.15
  -2   8   8  520.13   26.90
  -2  -8   7   53.11    8.12
   2   8  -7   63.07    8.57
   2   8  -7   44.89    7.62
  -2   8   7   72.84   10.76
  -2   8   7   51.22   12.21
  -2  -8   6  141.79   10.76
   2   8  -6  154.89   11.86
   2   8  -6  131.13   10.06
  -2   8   6  147.72   13.80
  -2   8   6  175.17   14.45
  -2  -8   5  352.73   18.13
   2   8  -5  348.20   17.69
   2   8  -5  368.67   19.33
  -2   8   5  361.15   20.28
  -2   8   5  376.00   20.68
  -2  -8   4   76.18    9.91
   2   8  -4   91.02   10.41
   2   8  -4   67.66    9.22
  -2   8   4   83.10   11.06
  -2   8   4   84.84   11.51
  -2  -8   3  129.23   12.36
   2   8  -3  135.26   11.16
  -2   8   3  150.51   12.41
  -2   8   3  178.56   13.30
  -2  -8   2  664.11   31.04
   2   8  -2  761.26   34.87
   2   8  -2  656.64   30.99
  -2   8   2  698.49   32.63
  -2   8   2  738.84   34.23
  -2  -8   1   -4.98    9.02
   2   8  -1    3.99    9.47
   2   8  -1    9.47    9.57
  -2   8   1   13.35    8.72
  -2   8   1    2.19    9.02
  -2  -8   0 1135.41   49.97
   2   8   0 1439.82   62.52
  -2   8   0 1254.48   54.35
  -2   8   0 1318.25   57.19
  -2  -8  -1  -21.07   10.36
   2   8   1    0.90    9.76
   2   8   1    8.07   10.21
  -2   8  -1   11.21    6.43
  -2   8  -1    8.87    7.72
  -2  -8  -2  834.99   38.56
   2   8   2  905.24   41.55
   2   8   2  947.09   43.34
  -2   8  -2  854.42   37.51
  -2   8  -2  834.00   36.37
  -2  -8  -3  144.98   13.45
   2   8   3  193.35   15.59
   2   8   3  191.21   15.34
  -2   8  -3  172.68    9.76
  -2   8  -3  202.52   11.31
  -2  -8  -4  260.11   17.79
   2   8   4  288.16   18.48
   2   8   4  257.22   17.94
  -2  -8  -5  194.90   16.34
   2   8   5  240.43   17.34
   2   8   5  205.71   16.49
  -2  -8  -6   19.48   12.50
   2   8   6    8.62   11.81
   2   8   6    7.22   11.91
  -2  -8  -7   77.32   13.45
   2   8   7   95.90   14.20
   2   8   7  103.53   14.10
   2   8   8  237.45   16.74
   2   8   8  192.06   16.59
   2   8   9   52.71   12.26
   2   8   9   30.29   12.55
   2   8  10  792.15   37.66
   2   8  10  747.81   36.07
   2   8  11  -16.09   11.71
   2   8  11   -5.53   12.46
   2   8  12  524.61   27.15
   2   8  12  580.41   29.89
   2   8  13   65.27   12.41
   2   8  13   39.41   12.11
   2   8  14  267.69   17.79
   2   8  14  286.12   20.03
   2   8  15  107.91   13.35
   2   8  15  122.01   15.25
   2   8  16   13.50   13.60
   2   8  16    3.29   11.86
   2   8  17   36.27   14.45
   2   8  17   18.43   13.05
   2   8  18   35.32   14.05
   2   8  18   54.70   15.20
  -2   9  17   67.51   11.81
  -2   9  17   66.41   13.30
  -2   9  16   99.19   15.49
  -2   9  16   83.60   14.70
  -2   9  15   27.00   13.55
  -2   9  15    7.57   13.30
  -2   9  14  115.63   14.35
  -2   9  14  119.77   13.25
  -2   9  13  234.41   17.19
  -2   9  13  240.63   17.64
  -2   9  12    6.63   11.56
  -2   9  12    2.04   10.26
  -2   9  11  579.41   29.69
  -2   9  11  579.91   29.34
  -2   9  10   10.11   11.26
  -2   9  10  -19.83   11.91
  -2   9   9  705.96   34.18
  -2   9   9  737.84   35.17
  -2   9   8   10.91   11.76
  -2   9   8   25.26   11.61
  -2  -9   7  188.92   11.86
   2   9  -7  198.14   11.96
   2   9  -7  203.32   12.26
  -2   9   7  231.22   16.84
  -2   9   7  224.84   16.04
  -2  -9   6  161.87   11.91
   2   9  -6  143.08   11.46
   2   9  -6  128.89   10.21
  -2   9   6  149.06   14.85
  -2   9   6  150.21   13.95
  -2  -9   5   -0.40    8.92
   2   9  -5   -3.89    8.67
   2   9  -5   19.33    9.52
  -2   9   5   14.95   10.16
  -2   9   5    8.17   10.96
  -2  -9   4  268.73   17.04
   2   9  -4  212.63   15.34
   2   9  -4  216.42   14.75
  -2   9   4  213.98   15.84
  -2   9   4  203.32   15.15
  -2  -9   3   60.63   10.91
   2   9  -3   66.91   11.86
   2   9  -3   60.18   10.66
  -2   9   3   88.48   11.76
  -2   9   3   71.59   11.41
  -2  -9   2    8.82   11.11
   2   9  -2   28.40   11.01
   2   9  -2   15.00   10.51
  -2   9   2   10.71    9.91
  -2   9   2   14.50    9.42
  -2  -9   1  352.63   20.23
   2   9  -1  380.83   21.27
   2   9  -1  354.92   20.28
  -2   9   1  355.42   19.68
  -2   9   1  380.98   20.92
  -2  -9   0   12.70   11.56
   2   9   0   40.95   11.96
   2   9   0   19.58   11.46
  -2   9   0   19.93   10.81
  -2   9   0   27.15    9.62
  -2  -9  -1  666.60   32.78
   2   9   1  704.96   33.73
   2   9   1  651.16   32.03
  -2   9  -1  640.69   30.04
  -2   9  -1  677.56   31.54
  -2  -9  -2   -9.37   10.96
   2   9   2  -25.26   11.31
   2   9   2    7.12   10.56
  -2   9  -2    9.12    8.17
  -2   9  -2    5.68    8.07
  -2  -9  -3  510.16   27.70
   2   9   3  516.14   26.85
   2   9   3  541.05   27.55
  -2   9  -3  545.04   24.56
  -2   9  -3  522.62   23.91
  -2  -9  -4    5.73   12.50
   2   9   4   15.10   12.36
   2   9   4    3.24   12.80
  -2  -9  -5    6.33   12.31
   2   9   5   -4.98   11.66
   2   9   5   16.29   12.21
   2   9   6  139.85   14.45
   2   9   6  174.82   15.99
   2   9   7   55.40   11.96
   2   9   7   67.26   12.60
   2   9   8  218.21   17.94
   2   9   8  235.15   17.29
   2   9   9  257.72   18.33
   2   9   9  286.17   19.63
   2   9  10    7.57   11.91
   2   9  10    5.98   13.25
   2   9  11  379.88   22.62
   2   9  11  449.33   25.01
   2   9  12   24.26   11.46
   2   9  12   19.93   12.41
   2   9  13  254.48   17.54
   2   9  13  257.72   19.53
   2   9  14   31.98   12.90
   2   9  14   31.24   14.10
   2   9  15   47.58   12.31
   2   9  15   81.46   15.64
   2   9  16   69.45   15.20
   2   9  16   64.37   15.44
  -2  10  15   26.21   12.95
  -2  10  15   29.34   13.65
  -2  10  14  136.96   15.99
  -2  10  14  109.56   14.70
  -2  10  13  -15.10   13.05
  -2  10  13   -1.74   11.11
  -2  10  12  367.98   22.72
  -2  10  12  369.97   22.12
  -2  10  11   15.64   11.81
  -2  10  11  -15.99   12.26
  -2  10  10  336.54   21.47
  -2  10  10  340.72   20.53
  -2  10   9   38.26   12.01
  -2  10   9   38.86   12.26
  -2  10   8   85.99   13.05
  -2  10   8   83.05   11.81
   2  10  -7  177.71   10.36
   2  10  -7  179.65   10.76
  -2  10   7  205.41   15.64
  -2  10   7  220.06   16.39
   2  10  -6   30.79    9.07
   2  10  -6   21.17    9.52
  -2  10   6   23.57   11.31
  -2  10   6   42.70   11.61
   2  10  -5   39.36   10.96
   2  10  -5   45.69   10.86
  -2  10   5   43.49   12.06
  -2  10   5   75.43   12.60
   2  10  -4   24.86   11.46
  -2  10   4   62.87   13.10
  -2  10   4   56.99   11.46
  -2 -10   3  120.37   13.45
   2  10  -3  143.53   13.70
   2  10  -3  109.75   12.41
  -2  10   3  129.14   13.60
  -2  10   3  120.86   13.60
  -2 -10   2  328.57   20.08
   2  10  -2  316.96   19.83
   2  10  -2  344.36   20.53
  -2  10   2  347.20   20.28
  -2  10   2  344.61   20.18
  -2 -10   1   22.37   11.71
   2  10  -1   -0.85   11.86
   2  10  -1    0.40   12.31
  -2  10   1   20.48   10.46
  -2  10   1   30.09   10.71
  -2 -10   0  375.15   22.32
   2  10   0  354.57   21.07
   2  10   0  380.43   22.67
  -2  10   0  366.03   19.98
  -2  10   0  342.87   19.33
  -2 -10  -1    4.04   12.55
   2  10   1   11.61   11.66
   2  10   1   14.05   11.86
  -2  10  -1    6.68    9.86
  -2  10  -1    7.67    8.82
   2  10   2  325.98   20.13
   2  10   2  309.04   19.83
  -2  10  -2  328.92   18.13
  -2  10  -2  313.02   16.84
   2  10   3   -2.34   11.66
   2  10   3   -4.68   11.76
  -2  10  -3   -1.54    6.78
  -2  10  -3    4.78    6.97
   2  10   4  121.36   15.29
   2  10   4  166.20   15.49
   2  10   5   38.26   13.45
   2  10   5   32.58   12.85
   2  10   6   -9.81   12.21
   2  10   6   -0.90   11.96
   2  10   7  129.83   14.40
   2  10   7  138.80   15.25
   2  10   8   94.01   14.00
   2  10   8  101.68   13.65
   2  10   9   60.18   13.50
   2  10   9   72.44   14.50
   2  10  10  352.93   22.32
   2  10  10  360.20   22.82
   2  10  11    5.33   11.76
   2  10  11   11.21   14.25
   2  10  12  285.87   20.08
   2  10  12  272.67   20.43
   2  10  13   13.15   13.75
   2  10  13   -4.38   14.70
   2  10  14  115.53   16.04
   2  10  14   98.99   14.50
   2  10  15   28.70   15.20
   2  10  15   22.92   14.90
  -2  11  13  176.86   17.04
  -2  11  13  179.55   17.69
  -2  11  12    9.27   15.00
  -2  11  12   30.64   14.70
  -2  11  11  144.58   15.05
  -2  11  11  149.26   16.44
  -2  11  10    8.82   13.55
  -2  11  10   21.27   13.20
  -2  11   9  203.52   17.19
  -2  11   9  188.42   16.84
  -2  11   8    3.99   13.35
  -2  11   8  -13.70   12.41
  -2  11   7   27.45   12.50
  -2  11   7   62.38   13.95
   2  11  -6   62.18   11.36
   2  11  -6   50.02    9.37
  -2  11   6   62.92   13.80
  -2  11   6   66.56   13.70
   2  11  -5   50.97   14.35
   2  11  -5   42.65   10.96
  -2  11   5   89.63   13.65
   2  11  -4  208.05   15.74
   2  11  -4  229.82   17.59
  -2  11   4  229.08   17.14
  -2  11   4  238.04   17.44
   2  11  -3   48.28   13.90
   2  11  -3   42.50   13.75
  -2  11   3   59.29   12.75
  -2  11   3   83.10   13.15
   2  11  -2   -8.57   13.50
   2  11  -2    7.22   13.65
  -2  11   2   -0.70   12.31
  -2  11   2   -0.05   11.96
   2  11  -1  407.78   23.76
   2  11  -1  395.78   23.42
  -2  11   1  413.41   23.32
  -2  11   1  381.38   22.67
   2  11   0    2.14   13.30
   2  11   0   -8.17   12.95
  -2  11   0    0.00   11.86
  -2  11   0   16.64   12.95
   2  11   1  372.26   22.67
   2  11   1  374.55   22.77
  -2  11  -1  389.10   21.62
  -2  11  -1  365.48   21.02
   2  11   2    7.62   12.41
   2  11   2   -1.59   13.70
  -2  11  -2   23.32    9.91
  -2  11  -2   14.85   10.06
   2  11   3  188.67   16.84
   2  11   3  153.95   16.59
   2  11   4    1.15   12.75
   2  11   4   10.01   13.05
   2  11   5    0.95   12.75
   2  11   5   10.76   13.00
   2  11   6   48.03   14.15
   2  11   6   49.72   13.80
   2  11   7   15.54   14.85
   2  11   7   34.97   13.75
   2  11   8   33.88   13.95
   2  11   8   32.08   14.35
   2  11   9  157.48   16.89
   2  11   9  132.02   15.15
   2  11  10   18.53   14.55
   2  11  10   17.94   13.25
   2  11  11  275.71   20.97
   2  11  11  280.54   20.78
   2  11  12   25.11   15.79
   2  11  12   16.04   14.35
   2  11  13  145.78   17.84
   2  11  13  138.20   18.13
  -2  12  11   25.61   14.85
  -2  12  11   30.89   15.94
  -2  12  10   42.05   14.35
  -2  12  10   55.60   16.64
  -2  12   9  -17.64   14.95
  -2  12   9   11.96   14.05
  -2  12   8   61.78   14.15
  -2  12   8   83.20   15.89
  -2  12   7   78.87   15.29
  -2  12   7   89.88   15.84
  -2  12   6   48.28   14.20
  -2  12   6   46.43   14.75
   2  12  -5   32.33   12.85
   2  12  -5   43.94   15.74
  -2  12   5   77.37   14.95
  -2  12   5   71.44   15.59
   2  12  -4   21.02   13.80
   2  12  -4   12.31   16.09
  -2  12   4   51.66   14.30
  -2  12   4   72.84   15.34
   2  12  -3   41.95   19.33
   2  12  -3   77.42   14.80
  -2  12   3   59.83   15.25
  -2  12   3   39.96   14.25
   2  12  -2  234.46   19.98
   2  12  -2  193.15   21.32
  -2  12   2  215.52   19.23
  -2  12   2  212.34   19.78
   2  12  -1   -0.25   17.39
   2  12  -1    4.04   15.34
  -2  12   1    2.54   14.35
  -2  12   1  -17.54   15.94
   2  12   0  119.77   17.94
   2  12   0  147.97   17.39
  -2  12   0  148.96   17.19
  -2  12   0  119.17   17.94
   2  12   1   -1.05   15.05
   2  12   1   -6.73   15.29
  -2  12  -1   -4.53   12.65
  -2  12  -1    6.93   14.85
   2  12   2  158.58   17.49
   2  12   2  151.75   17.59
  -2  12  -2  166.00   13.65
  -2  12  -2  149.01   15.29
   2  12   3   44.69   16.24
   2  12   3   68.35   15.05
   2  12   4   15.20   15.74
   2  12   4   15.05   14.75
   2  12   5   32.98   16.19
   2  12   5   38.61   15.15
   2  12   6  -15.59   14.50
   2  12   6  -22.77   15.29
   2  12   7   17.59   14.40
   2  12   7    4.88   15.39
   2  12   8   44.39   14.30
   2  12   8   64.92   16.74
   2  12   9   31.89   15.89
   2  12   9   15.00   15.49
   2  12  10  187.18   19.53
   2  12  10  128.44   17.64
  -2  13   7   45.93   18.53
  -2  13   7    7.07   17.64
  -2  13   6   35.47   18.04
  -2  13   6   57.84   17.89
  -2  13   5    8.22   17.24
  -2  13   5   18.28   17.79
   2  13  -4   32.23   12.65
   2  13  -4   27.60   14.35
  -2  13   4   94.11   20.68
   2  13  -3   57.09   17.39
   2  13  -3   93.02   19.43
  -2  13   3   54.20   20.03
  -2  13   3   69.30   18.13
   2  13  -2  -17.19   19.93
   2  13  -2   12.06   19.08
  -2  13   2    8.72   20.87
  -2  13   2   18.73   20.68
   2  13  -1  145.78   23.66
   2  13  -1  217.22   24.16
  -2  13   1  171.13   22.87
  -2  13   1  163.81   20.92
   2  13   0  -37.32   20.03
   2  13   0   24.26   20.43
  -2  13   0   18.53   16.59
  -2  13   0    2.99   16.04
   2  13   1   73.24   20.03
   2  13   1   90.47   18.48
  -2  13  -1   20.43   14.95
  -2  13  -1   47.78   14.45
   2  13   2    7.47   17.69
   2  13   2   10.71   18.58
   2  13   3   14.15   18.13
   2  13   3   46.83   18.68
   2  13   4   12.50   18.23
   2  13   4   49.22   18.48
   2  13   5  -23.07   18.93
   2  13   5  -14.55   17.49
   2  13   6   34.63   17.74
   2  13   6   16.39   18.28
  -3   0  23  -15.49   12.36
  -3   0  23    3.49   13.60
  -3   0  22    1.30   12.50
  -3   0  22    4.68   11.86
   3   0 -21  -10.71   11.91
  -3   0  21    5.03   10.36
  -3   0  21   13.95   11.91
   3   0 -20   83.45   13.00
  -3   0  20   79.12   11.46
  -3   0  20   76.52   12.46
   3   0 -19   -5.93   10.91
  -3   0  19   -1.89   10.56
  -3   0  19   -3.59    9.91
   3   0 -18  995.42   45.44
  -3   0  18 1042.75   47.08
  -3   0  18  967.52   43.94
   3   0 -17  -18.78    9.57
  -3   0  17  -16.54    9.52
   3   0 -16 1161.32   51.66
  -3   0  16 1242.53   55.55
  -3   0  16 1206.66   53.41
   3   0 -15   -0.55   10.11
  -3   0  15    1.00    9.52
  -3   0  15   16.09    9.32
   3   0 -14  625.25   30.14
  -3   0  14  605.32   29.10
   3   0 -13    4.04   10.36
  -3   0  13    6.28    8.32
   3   0 -12  342.72   19.83
  -3   0  12  376.00   20.53
   3   0 -11  -10.76    9.17
  -3   0  11    3.39    8.57
   3   0 -10  104.32   11.01
  -3   0  10  100.69   10.51
   3   0  -9    8.52    7.42
  -3   0   9   -6.58    8.02
   3   0  -8 2224.49   94.51
  -3   0   8 2263.85   96.45
   3   0  -7    3.04    8.57
  -3   0   7   -1.39    7.97
   3   0  -6 5071.74  211.64
  -3   0   6 5066.76  211.34
   3   0  -5   -2.84    7.17
  -3   0   5    1.00    6.58
   3   0  -4 6023.31  250.75
  -3   0   4 6063.17  252.14
   3   0  -3   -6.48    6.93
  -3   0   3    4.33    7.72
   3   0  -2 1861.30   78.97
  -3   0   2 1894.68   80.31
   3   0  -1    0.70    7.52
  -3   0   1   -7.87    7.97
   3   0   0   -2.89    8.07
  -3   0   0    9.47    7.87
   3   0   1   17.59    8.22
  -3   0  -1   12.01    7.12
   3   0   2   25.81    7.97
  -3   0  -2   42.85    9.27
   3   0   3   -6.93    8.17
  -3   0  -3   -7.62    7.97
   3   0   4 4011.06  167.75
  -3   0  -4 3825.23  159.92
   3   0   5  -11.86    7.52
  -3   0  -5    3.09    7.92
   3   0   6 2241.43   94.46
  -3   0  -6 2228.97   94.31
   3   0   7    5.78    7.82
   3   0   7    5.88    7.72
  -3   0  -7   -6.03    7.97
   3   0   8 2604.62  109.95
   3   0   8 2598.15  109.85
  -3   0  -8 2564.77  108.36
   3   0   9   -6.48    8.07
   3   0   9    4.04    7.77
  -3   0  -9   -9.67    8.07
   3   0  10 1384.52   59.98
   3   0  10 1418.89   61.58
  -3   0 -10 1442.31   62.57
   3   0  11   -0.05    7.97
   3   0  11    4.28    8.32
  -3   0 -11  -13.85    7.62
   3   0  12   25.36    9.76
   3   0  12   14.90    8.22
   3   0  13    8.72    9.72
   3   0  13   -0.65    9.17
   3   0  14  708.45   32.83
   3   0  14  792.65   36.72
   3   0  15  -12.55    8.82
   3   0  15  -23.02    9.91
   3   0  16 1196.69   53.36
   3   0  16 1207.65   53.46
   3   0  17   -7.42    9.62
   3   0  17   -7.92   10.11
   3   0  18  943.10   43.24
   3   0  18  902.25   41.10
   3   0  19    6.83   11.46
   3   0  19    8.97   10.81
   3   0  20   27.05   12.55
   3   0  20   14.45   12.01
   3   0  21  -10.96   13.20
   3   0  21   13.45   12.85
   3   0  22   -6.88   15.25
   3   0  22   24.96   15.05
  -3  -1  23   86.34   15.74
  -3  -1  23  124.40   16.59
  -3   1  23   71.34   13.10
  -3   1  23   67.11   15.05
  -3  -1  22   11.31   11.41
  -3  -1  22   -2.69   14.25
  -3   1  22  -16.99   11.46
  -3   1  22   -1.79   11.46
   3  -1 -21    2.59   11.06
  -3  -1  21   10.11   12.75
  -3  -1  21    2.24   12.06
   3   1 -21    5.88   12.06
  -3   1  21  -20.87   12.11
  -3   1  21   -7.02   11.36
   3  -1 -20    7.77   11.41
  -3  -1  20    8.47    9.76
  -3  -1  20   13.45   11.21
   3   1 -20    5.68   11.36
  -3   1  20    9.91   11.91
  -3   1  20    3.29   12.06
   3  -1 -19  356.62   20.83
  -3  -1  19  304.65   18.83
  -3  -1  19  371.06   20.28
   3   1 -19  369.62   20.78
  -3   1  19  328.42   19.63
   3  -1 -18   11.71   10.76
  -3  -1  18   20.92    9.27
  -3  -1  18   15.25    9.37
   3   1 -18   33.98   10.76
  -3   1  18    9.76   10.76
  -3   1  18   -5.68   10.16
   3  -1 -17 1591.27   69.35
  -3  -1  17 1499.60   65.17
   3   1 -17 1552.91   67.56
  -3   1  17 1571.84   68.85
  -3   1  17 1582.80   68.90
   3  -1 -16  138.35   12.90
  -3  -1  16  136.96   11.91
  -3  -1  16   99.54   10.86
   3   1 -16  139.45   12.46
  -3   1  16  149.26   12.36
  -3   1  16  126.54   13.25
   3  -1 -15 1066.16   48.28
  -3  -1  15 1055.20   46.83
  -3  -1  15 1054.20   47.08
   3   1 -15 1072.64   48.03
  -3   1  15 1021.32   46.43
  -3   1  15 1103.53   49.02
   3  -1 -14    6.23   10.86
  -3  -1  14    5.03    7.47
   3   1 -14   14.50    8.47
  -3   1  14   -5.68   10.11
  -3   1  14   -2.09    8.87
   3  -1 -13  336.24   19.98
  -3  -1  13  327.92   18.04
   3   1 -13  391.54   21.17
  -3   1  13  346.60   19.18
  -3   1  13  351.98   19.58
   3  -1 -12  272.22   16.94
  -3  -1  12  260.81   15.39
   3   1 -12  296.33   17.59
  -3   1  12  285.67   17.39
   3  -1 -11  185.93   14.30
  -3  -1  11  180.80   12.16
   3   1 -11  224.34   14.70
  -3   1  11  208.10   14.40
   3  -1 -10   20.78    9.47
  -3  -1  10   22.97    7.62
   3   1 -10   21.82    8.42
  -3   1  10   30.99    9.57
   3  -1  -9   19.63    9.37
  -3  -1   9   14.10    7.57
   3   1  -9   25.36    8.72
  -3   1   9   -1.44    7.62
   3  -1  -8  185.48   12.75
  -3  -1   8  204.81   12.95
   3   1  -8  218.26   14.00
  -3   1   8  200.43   13.90
   3  -1  -7 5485.25  228.83
  -3  -1   7 5440.41  226.78
   3   1  -7 5819.05  242.53
  -3   1   7 5888.80  245.67
   3  -1  -6  519.63   25.31
  -3  -1   6  484.01   23.22
   3   1  -6  487.84   23.66
  -3   1   6  478.03   23.66
   3  -1  -5 6272.42  260.91
  -3  -1   5 6172.78  256.88
   3   1  -5 6426.86  267.54
  -3   1   5 6476.68  269.73
   3  -1  -4   91.72    9.42
  -3  -1   4  112.59    9.76
   3   1  -4  106.62    9.91
  -3   1   4  112.89    9.62
   3  -1  -3 2376.94  100.44
  -3  -1   3 2377.94  100.44
   3   1  -3 2481.07  104.72
  -3   1   3 2574.73  108.46
   3  -1  -2  360.55   18.63
  -3  -1   2  364.94   19.03
   3   1  -2  353.38   18.08
  -3   1   2  375.40   19.13
   3  -1  -1  396.67   19.18
  -3  -1   1  391.99   19.83
   3   1  -1  402.35   20.23
  -3   1   1  397.17   19.38
   3  -1   0   16.64    6.78
  -3  -1   0   20.92    8.37
   3   1   0   16.74    7.97
  -3   1   0   14.65    7.67
   3  -1   1  372.76   18.04
  -3  -1  -1  347.50   18.48
   3   1   1  340.92   18.23
  -3   1  -1  364.79   18.33
   3  -1   2  991.43   42.90
  -3  -1  -2  887.80   39.46
   3   1   2  977.98   43.34
  -3   1  -2  959.05   41.95
   3  -1   3   82.65    8.42
  -3  -1  -3  103.48   10.41
   3   1   3   63.87    9.07
  -3   1  -3   86.09    9.22
   3  -1   4  475.79   22.22
  -3  -1  -4  454.96   22.62
   3   1   4  474.74   22.87
  -3   1  -4  440.46   21.32
   3  -1   5 2489.04  104.62
  -3  -1  -5 2531.88  107.11
   3   1   5 2648.46  111.75
  -3   1  -5 2432.74  102.43
   3  -1   6    6.03    6.73
  -3  -1  -6   -1.05    7.67
   3   1   6   12.80    8.87
  -3   1  -6    6.33    7.42
   3  -1   7 3010.66  126.30
   3  -1   7 3123.75  130.88
  -3  -1  -7 3145.18  132.37
   3   1   7 3244.82  136.56
   3   1   7 3243.82  136.11
  -3   1  -7 2891.59  121.46
   3  -1   8   13.75    8.02
   3  -1   8   -3.89    7.17
  -3  -1  -8    8.22    9.17
   3   1   8   -2.09    8.37
   3   1   8    4.58    9.07
  -3   1  -8    5.43    7.37
   3  -1   9 1025.81   44.99
   3  -1   9  947.09   41.75
  -3  -1  -9  881.33   40.11
   3   1   9 1096.05   48.77
   3   1   9 1110.00   49.62
  -3   1  -9 1115.98   48.92
   3  -1  10   63.07    9.17
   3  -1  10   58.04    8.77
  -3  -1 -10   42.60    9.62
   3   1  10   46.63   10.26
   3   1  10   63.67    9.96
  -3   1 -10   35.67    8.07
   3  -1  11  159.87   12.50
   3  -1  11  167.15   11.71
  -3  -1 -11  202.62   14.25
   3   1  11  165.95   13.90
   3   1  11  177.86   12.95
   3  -1  12   32.23    8.82
   3  -1  12   35.62    8.02
   3   1  12   18.18    9.37
   3   1  12   36.22    9.72
   3   1  13  316.66   18.53
   3   1  13  300.82   17.84
   3  -1  14  -13.60    9.96
   3  -1  14    8.62    8.92
   3   1  14    6.68   10.41
   3   1  14   -4.23   10.56
   3  -1  15  825.53   37.81
   3  -1  15  874.85   40.21
   3   1  15  831.01   38.31
   3   1  15  804.10   37.37
   3  -1  16   -1.79   10.36
   3  -1  16   11.46    8.82
   3   1  16   -8.52   10.96
   3   1  16   -1.30    9.12
   3  -1  17  945.10   42.95
   3  -1  17 1044.24   46.58
   3   1  17 1129.43   50.57
   3   1  17 1122.96   50.17
   3  -1  18   13.10   10.81
   3  -1  18   25.41   10.16
   3   1  18   16.19   10.51
   3   1  18    9.47    9.81
   3  -1  19  616.28   30.39
   3  -1  19  647.17   31.64
   3   1  19  667.10   31.94
   3   1  19  619.77   30.14
   3  -1  20   41.30   13.10
   3  -1  20   12.65   13.30
   3   1  20   24.76   11.31
   3   1  20   15.69   12.21
   3  -1  21   -3.49   14.50
   3  -1  21    6.58   13.20
   3   1  21   13.25   12.90
   3   1  21   -7.27   12.50
   3  -1  22   -8.57   16.04
   3  -1  22    7.52   15.10
   3   1  22  -12.26   15.15
   3   1  22   17.04   13.80
  -3  -2  22   87.88   14.65
  -3  -2  22   67.51   13.65
  -3   2  22  116.83   15.00
  -3   2  22   68.45   11.86
  -3  -2  21  -11.51   11.11
  -3  -2  21    8.22   13.90
   3   2 -21    6.97   12.36
  -3   2  21   -0.85   10.31
  -3   2  21   -3.14   10.71
   3  -2 -20  128.89   14.45
  -3  -2  20  141.79   13.45
  -3  -2  20  142.24   14.15
   3   2 -20  144.03   15.29
  -3   2  20  125.20   13.00
  -3   2  20  119.42   14.00
   3  -2 -19   47.98   12.31
  -3  -2  19   59.14   11.16
  -3  -2  19   51.96   11.06
   3   2 -19   79.71   11.36
  -3   2  19   60.23   11.21
  -3   2  19   57.79   12.16
   3  -2 -18  633.72   30.99
  -3  -2  18  593.86   28.75
  -3  -2  18  639.20   30.79
   3   2 -18  537.07   27.40
  -3   2  18  641.69   31.59
  -3   2  18  639.20   30.99
   3  -2 -17   37.96   11.96
  -3  -2  17   50.72    9.62
  -3  -2  17   64.67    9.81
   3   2 -17   52.51   10.51
  -3   2  17   55.50   11.26
  -3   2  17   67.56   12.55
   3  -2 -16 1324.73   58.59
  -3  -2  16 1340.67   58.39
  -3  -2  16 1299.32   57.24
   3   2 -16 1338.68   58.84
  -3   2  16 1317.76   58.84
  -3   2  16 1360.60   60.23
   3  -2 -15    0.60   10.76
  -3  -2  15   12.70    8.82
  -3  -2  15   25.11    9.72
   3   2 -15    2.64    9.17
  -3   2  15    9.76   11.66
  -3   2  15   23.52   11.91
   3  -2 -14 1592.27   69.90
  -3  -2  14 1591.27   68.85
   3   2 -14 1512.06   65.96
  -3   2  14 1639.60   71.69
  -3   2  14 1525.01   67.01
   3  -2 -13  387.50   22.12
  -3  -2  13  353.43   18.73
   3   2 -13  404.14   21.42
  -3   2  13  353.28   19.68
  -3   2  13  363.49   20.38
   3  -2 -12  794.14   37.42
  -3  -2  12  768.73   35.17
   3   2 -12  745.32   34.53
  -3   2  12  793.64   37.12
   3  -2 -11   30.29   10.86
  -3  -2  11   36.42    7.72
   3   2 -11   33.23    8.77
  -3   2  11   21.92    8.87
   3  -2 -10   21.07    9.91
  -3  -2  10   -0.85    6.93
   3   2 -10    1.39    8.17
  -3   2  10   -5.73    9.32
   3  -2  -9  399.16   20.97
  -3  -2   9  417.55   21.02
   3   2  -9  439.92   22.07
  -3   2   9  391.94   21.02
   3  -2  -8 2650.46  112.59
  -3  -2   8 2633.02  111.20
   3   2  -8 2564.77  108.41
  -3   2   8 2739.14  116.03
   3  -2  -7  144.88   12.31
  -3  -2   7  157.73   11.36
   3   2  -7  174.52   12.31
  -3   2   7  149.76   12.50
   3  -2  -6 4726.98  197.79
  -3  -2   6 4627.84  193.25
   3   2  -6 4783.28  199.63
  -3   2   6 4978.58  208.05
   3  -2  -5   39.36    9.32
  -3  -2   5   49.97    7.57
   3   2  -5   37.07    7.47
  -3   2   5   36.92    8.97
   3  -2  -4 3010.66  126.39
  -3  -2   4 2919.99  122.71
   3   2  -4 2934.44  123.36
  -3   2   4 2990.73  125.90
   3  -2  -3  184.93   12.41
  -3  -2   3  181.60   11.76
   3   2  -3  185.08   12.26
  -3   2   3  201.23   12.80
   3  -2  -2 4493.82  187.48
  -3  -2   2 4498.30  187.82
   3   2  -2 4294.54  179.35
  -3   2   2 4723.00  196.99
   3  -2  -1  273.17   15.29
  -3  -2   1  270.82   15.44
   3   2  -1  284.68   16.24
  -3   2   1  246.56   13.95
   3  -2   0  257.37   13.65
  -3  -2   0  273.02   15.34
   3   2   0  262.55   15.59
  -3   2   0  290.40   15.44
   3  -2   1 3996.11  166.30
  -3  -2  -1 3557.19  148.86
   3   2   1 3792.35  158.88
  -3   2  -1 3739.04  155.94
   3  -2   2 3180.05  132.57
  -3  -2  -2 3115.78  130.83
   3   2   2 3028.10  127.24
  -3   2  -2 3063.97  127.94
   3  -2   3  718.41   31.19
  -3  -2  -3  688.02   31.69
   3   2   3  731.86   33.63
  -3   2  -3  679.06   29.94
   3  -2   4 3749.50  156.14
  -3  -2  -4 3798.82  159.38
   3   2   4 3609.01  151.60
  -3   2  -4 3561.18  148.37
   3  -2   5  199.33   11.31
  -3  -2  -5  220.46   14.85
   3   2   5  226.93   14.35
  -3   2  -5  193.60   11.16
   3  -2   6 3696.19  154.39
   3  -2   6 4204.86  175.67
  -3  -2  -6 3929.35  164.81
   3   2   6 3607.51  151.36
  -3   2  -6 3522.32  147.02
   3  -2   7   20.33    6.08
   3  -2   7   12.31    6.97
  -3  -2  -7   26.01    9.57
   3   2   7   20.43    9.37
   3   2   7    1.20    9.37
  -3   2  -7   29.29    6.78
   3  -2   8 1162.32   50.07
   3  -2   8 1074.63   46.28
   3   2   8 1274.41   55.80
   3   2   8 1217.62   54.11
  -3   2  -8 1163.31   50.27
   3  -2   9   20.48    6.88
   3  -2   9   23.42    7.87
  -3  -2  -9   21.67    8.62
   3   2   9   10.71   10.01
   3   2   9   16.54    9.07
  -3   2  -9   25.91    7.62
   3  -2  10  126.44   10.31
   3  -2  10  130.53   10.71
  -3  -2 -10  108.71   12.01
   3   2  10  119.37   12.60
   3   2  10  136.01   12.46
   3  -2  11   34.08    7.92
   3  -2  11   55.40    8.17
  -3  -2 -11   61.53   11.06
   3   2  11   34.72   11.36
   3   2  11   77.87   11.51
   3  -2  12   52.26    9.32
   3  -2  12   27.55    8.32
  -3  -2 -12   46.88   10.11
   3   2  12   55.00   11.11
   3   2  12   44.89   10.76
   3  -2  13   11.21    7.57
   3  -2  13   -1.54    9.52
   3   2  13    1.69    9.42
   3   2  13   -2.59   10.31
   3  -2  14  765.24   35.37
   3  -2  14  675.07   31.14
   3   2  14  822.54   38.66
   3   2  14  791.15   36.42
   3  -2  15   26.45    9.37
   3  -2  15    5.18    9.22
   3   2  15    7.02   10.81
   3   2  15   31.34   10.96
   3  -2  16 1323.73   58.09
   3  -2  16 1251.99   54.95
   3   2  16 1329.71   58.89
   3   2  16 1301.31   57.59
   3  -2  17   16.89    9.86
   3  -2  17    5.98   11.16
   3   2  17    8.47   11.16
   3   2  17   -6.58    9.62
   3  -2  18  968.51   43.59
   3  -2  18 1013.35   45.79
   3   2  18 1081.11   48.43
   3   2  18 1023.32   46.23
   3  -2  19   16.09   12.41
   3  -2  19    6.93   11.81
   3   2  19    7.82   10.21
   3   2  19   -0.05   11.96
   3  -2  20   98.89   15.15
   3  -2  20   90.92   15.49
   3   2  20   70.35   12.06
   3   2  20   43.14   11.76
   3  -2  21    5.08   16.44
   3  -2  21  -19.23   14.25
   3   2  21    1.69   10.86
   3   2  21   -8.82   12.70
  -3  -3  22    6.58   13.40
  -3  -3  22  -31.09   14.45
  -3   3  22    0.20   11.51
  -3   3  22   17.09   14.90
  -3  -3  21   -0.85   12.55
  -3  -3  21    2.34   14.70
   3   3 -21   12.90   14.50
  -3   3  21    2.69   11.86
  -3   3  21   -2.49   13.55
   3  -3 -20   16.64   12.31
  -3  -3  20   15.29   10.01
  -3  -3  20   11.46   12.85
   3   3 -20   13.15   12.55
  -3   3  20   -0.75   13.25
  -3   3  20   22.62   13.65
   3  -3 -19  332.90   21.02
  -3  -3  19  350.24   20.18
  -3  -3  19  341.32   19.48
   3   3 -19  404.14   22.17
  -3   3  19  407.53   23.42
  -3   3  19  368.42   22.57
   3  -3 -18   30.84   13.00
  -3  -3  18    6.63   10.71
  -3  -3  18   15.59    9.32
   3   3 -18   29.79   11.06
  -3   3  18    7.07   12.55
  -3   3  18   15.89   12.80
  -3  -3  17 1117.48   49.77
  -3  -3  17 1120.47   49.52
   3   3 -17 1193.20   52.91
  -3   3  17 1253.99   55.95
  -3   3  17 1310.78   58.59
   3  -3 -16   75.43   12.60
  -3  -3  16   65.02    9.47
  -3  -3  16   47.28    9.37
   3   3 -16   61.03   10.41
  -3   3  16   56.00   13.15
  -3   3  16   40.75   11.46
   3  -3 -15  942.61   43.05
  -3  -3  15  800.62   36.42
  -3  -3  15  933.14   41.85
   3   3 -15 1042.25   46.83
  -3   3  15 1090.08   48.62
  -3   3  15 1026.80   47.13
   3  -3 -14    3.34   10.21
  -3  -3  14    1.00    7.67
   3   3 -14   -0.20    8.72
  -3   3  14   -3.84   11.46
  -3   3  14    3.99    9.52
   3  -3 -13  299.47   19.08
  -3  -3  13  297.33   16.59
   3   3 -13  293.34   16.79
  -3   3  13  308.14   19.18
  -3   3  13  291.50   18.88
   3  -3 -12   38.56   11.71
  -3  -3  12   32.13    7.77
   3   3 -12   18.28    9.57
  -3   3  12   31.04   11.51
  -3   3  12   35.67    9.37
   3  -3 -11  195.25   15.64
  -3  -3  11  195.99   12.60
   3   3 -11  191.41   13.55
  -3   3  11  185.53   14.50
  -3   3  11  164.01   14.00
   3  -3 -10  242.43   16.64
  -3  -3  10  258.67   14.55
   3   3 -10  246.31   14.65
  -3   3  10  232.36   15.15
  -3   3  10  200.98   14.05
   3  -3  -9  165.21   13.30
  -3  -3   9  173.67   11.26
   3   3  -9  162.86   12.31
  -3   3   9  150.06   12.36
   3  -3  -8   -1.44    9.07
  -3  -3   8   18.18    6.78
   3   3  -8   33.48    8.17
  -3   3   8    3.84    8.12
   3  -3  -7 4039.46  169.44
  -3  -3   7 3822.74  159.82
   3   3  -7 4026.50  168.39
  -3   3   7 4090.77  171.48
   3  -3  -6   69.60    9.96
  -3  -3   6   69.50    8.47
   3   3  -6   84.60    8.27
  -3   3   6   75.63    9.12
   3  -3  -5 2816.86  119.02
  -3  -3   5 2838.78  119.32
   3   3  -5 2845.26  119.62
  -3   3   5 2874.65  121.36
   3  -3  -4    6.03    8.47
  -3  -3   4   20.83    7.52
   3   3  -4    8.52    6.63
  -3   3   4   12.11    8.22
   3  -3  -3 1293.34   55.85
  -3  -3   3 1320.74   57.04
   3   3  -3 1302.31   56.30
  -3   3   3 1349.14   58.29
   3  -3  -2   72.34    8.67
  -3  -3   2   77.12    8.92
   3   3  -2   81.11    8.77
  -3   3   2   82.80    8.82
   3  -3  -1 1046.23   45.39
  -3  -3   1 1109.51   48.53
   3   3  -1 1066.16   46.88
  -3   3   1 1048.72   45.64
   3  -3   0  397.17   18.88
  -3  -3   0  397.67   20.38
   3   3   0  412.96   21.12
  -3   3   0  397.47   18.98
   3  -3   1   34.48    5.63
  -3  -3  -1   46.73    8.27
   3   3   1   21.22    8.87
  -3   3  -1   30.74    6.13
   3  -3   2  412.22   18.58
  -3  -3  -2  379.93   20.08
   3   3   2  449.93   23.12
  -3   3  -2  452.72   20.68
   3  -3   3 4817.16  200.18
  -3  -3  -3 4658.73  194.70
   3   3   3 4590.47  192.01
  -3   3  -3 4823.13  200.48
   3  -3   4  725.89   31.19
  -3  -3  -4  697.49   32.53
   3   3   4  653.15   30.64
  -3   3  -4  706.46   30.44
   3  -3   5 7104.42  294.79
  -3  -3  -5 7004.78  291.55
   3   3   5 6910.12  287.66
  -3   3  -5 6735.75  279.59
   3  -3   6  249.35   12.41
   3  -3   6  228.18   11.26
  -3  -3  -6  198.09   13.90
   3   3   6  251.74   15.44
  -3   3  -6  234.41   11.76
   3  -3   7 2974.79  124.20
   3  -3   7 2906.04  121.26
  -3  -3  -7 3045.04  128.69
   3   3   7 2947.89  124.45
   3   3   7 2929.95  123.90
  -3   3  -7 2973.79  124.15
   3  -3   8    4.93    5.63
   3  -3   8    1.39    5.73
  -3  -3  -8    9.22    9.86
   3   3   8   11.46   10.16
   3   3   8    0.20    9.27
   3  -3   9  936.13   40.80
   3  -3   9  925.67   40.01
  -3  -3  -9  917.20   42.00
   3   3   9 1028.80   46.73
   3   3   9  874.85   40.55
   3  -3  10  102.88    9.17
   3  -3  10  110.00    8.52
  -3  -3 -10  108.06   12.16
   3   3  10   83.30   10.31
   3   3  10  116.53   12.65
   3  -3  11   13.40    6.78
   3  -3  11    4.93    7.52
  -3  -3 -11   -6.88   10.46
   3   3  11   17.44   10.76
   3   3  11   -4.33    9.72
   3  -3  12   36.37    9.02
   3  -3  12   25.91    7.97
  -3  -3 -12   36.22   10.96
   3   3  12   35.32   12.46
   3   3  12   47.28   11.71
   3  -3  13  473.69   22.77
   3  -3  13  464.48   22.32
   3   3  13  504.68   26.90
   3   3  13  471.15   26.06
   3  -3  14   16.34    8.12
   3  -3  14   -0.25    8.22
   3   3  14   -6.43   10.06
   3   3  14    6.78   11.81
   3  -3  15  987.44   44.19
   3  -3  15 1009.37   44.64
   3   3  15 1125.45   50.42
   3   3  15 1095.56   49.52
   3  -3  16   25.91    9.62
   3  -3  16    4.04   10.16
   3   3  16    1.00   11.91
   3   3  16  -11.71   11.01
   3  -3  17 1077.62   48.13
   3  -3  17 1104.03   48.92
   3   3  17 1102.03   49.22
   3   3  17 1077.12   48.53
   3  -3  18   -8.17   11.11
   3  -3  18    3.09   11.91
   3   3  18   -3.29   10.31
   3   3  18   10.56   10.71
   3  -3  19  599.34   30.74
   3  -3  19  535.57   28.45
   3   3  19  544.54   26.75
   3   3  19  544.04   27.75
   3  -3  20   34.68   15.15
   3  -3  20   24.06   14.55
   3   3  20   15.89   12.06
   3   3  20    6.53   10.81
   3  -3  21   59.24   17.64
   3  -3  21   62.08   16.39
   3   3  21   51.17   12.16
   3   3  21   63.12   12.70
  -3  -4  22   -7.52   13.95
  -3  -4  22  -21.07   17.04
  -3   4  22    0.65   13.00
  -3   4  22    6.03   14.25
  -3  -4  21   -5.53   14.45
  -3  -4  21    8.37   12.21
  -3   4  21  -16.29   13.45
  -3   4  21   14.45   13.90
  -3  -4  20  108.56   12.90
  -3  -4  20   98.45   15.49
   3   4 -20  111.30   14.50
  -3   4  20   93.96   13.35
  -3   4  20  110.10   14.25
   3  -4 -19   -1.25   11.86
  -3  -4  19   18.83   12.01
  -3  -4  19    9.67    9.67
   3   4 -19   10.96   12.31
  -3   4  19   21.37   13.10
  -3   4  19    8.42   11.46
   3  -4 -18  546.03   29.19
  -3  -4  18  540.55   26.06
  -3  -4  18  581.90   28.45
   3   4 -18  543.04   27.25
  -3   4  18  521.12   27.15
  -3   4  18  585.89   29.05
   3  -4 -17   23.81   12.55
  -3  -4  17   56.25   10.76
  -3  -4  17   36.02    8.57
   3   4 -17   15.54   10.21
  -3   4  17   33.88   12.75
  -3   4  17   34.23   12.16
   3  -4 -16  932.64   43.29
  -3  -4  16  822.04   37.51
  -3  -4  16  885.81   39.71
   3   4 -16  880.33   40.21
  -3   4  16  892.29   41.35
  -3   4  16  876.34   40.80
   3  -4 -15   17.04   11.71
  -3  -4  15   33.13    7.77
  -3  -4  15   26.11    8.87
   3   4 -15   16.89    9.32
  -3   4  15   20.97   12.11
  -3   4  15   21.82   12.01
   3  -4 -14  546.53   27.35
  -3  -4  14  481.62   23.32
   3   4 -14  517.64   25.36
  -3   4  14  553.01   28.60
  -3   4  14  552.01   28.05
   3  -4 -13  210.59   16.54
  -3  -4  13  180.95   11.76
   3   4 -13  194.00   12.75
  -3   4  13  221.00   15.94
  -3   4  13  205.26   15.64
   3  -4 -12  379.73   21.82
  -3  -4  12  367.33   18.48
   3   4 -12  373.41   19.13
  -3   4  12  357.11   20.33
   3  -4 -11   41.50    9.67
  -3  -4  11   54.01    7.77
   3   4 -11   41.25    9.32
  -3   4  11   27.85   10.36
  -3   4  11   17.89    9.67
   3  -4 -10  179.60   14.40
  -3  -4  10  158.43   10.56
   3   4 -10  182.99   12.60
  -3   4  10  153.60   13.90
  -3   4  10  144.13   13.65
   3   4  -9   43.14    8.52
  -3   4   9   48.53   10.66
  -3   4   9   54.80    9.52
   3  -4  -8  729.37   34.38
  -3  -4   8  723.40   32.43
   3   4  -8  729.87   33.08
  -3   4   8  733.36   34.03
  -3   4   8  651.65   31.24
   3  -4  -7   14.15    9.52
  -3  -4   7   14.05    6.13
   3   4  -7    3.19    6.68
  -3   4   7    7.32    7.97
   3  -4  -6  975.99   43.44
  -3  -4   6  998.90   43.64
   3   4  -6  965.52   42.50
  -3   4   6 1018.83   45.54
   3  -4  -5   28.05    8.17
  -3  -4   5   45.29    7.32
   3   4  -5   48.03    7.02
  -3   4   5   33.73    9.12
   3  -4  -4 2842.76  119.57
  -3  -4   4 2928.46  122.96
   3   4  -4 2890.59  121.61
  -3   4   4 3072.94  129.18
   3  -4  -3  206.51   12.80
  -3  -4   3  203.87   12.95
   3   4  -3  199.83   12.36
  -3   4   3  220.66   13.40
   3  -4  -2 1477.18   63.12
  -3  -4   2 1472.70   63.62
   3   4  -2 1491.63   64.22
  -3   4   2 1412.41   60.88
   3  -4  -1  259.76   14.05
  -3  -4   1  283.33   15.99
   3   4  -1  289.36   16.29
  -3   4   1  290.70   15.25
   3  -4   0  547.53   25.26
  -3  -4   0  530.59   25.36
   3   4   0  548.03   26.55
  -3   4   0  566.96   25.91
   3  -4   1  321.84   15.74
  -3  -4  -1  282.63   16.54
   3   4   1  356.87   19.48
  -3   4  -1  312.77   15.25
   3  -4   2  963.53   41.05
  -3  -4  -2  958.55   43.09
   3   4   2 1006.38   44.84
  -3   4  -2 1019.83   43.49
   3  -4   3   90.97    5.88
  -3  -4  -3   75.33    9.96
   3   4   3   83.75   10.26
  -3   4  -3   92.07    6.03
   3  -4   4 5216.22  219.76
  -3  -4  -4 5579.91  233.06
   3   4   4 5400.56  225.54
  -3   4  -4 5201.27  218.96
  -3  -4  -5   49.22   11.06
   3   4   5   30.89   10.16
  -3  -4  -6 4068.85  171.03
   3   4   6 4016.54  168.79
   3   4   6 3950.28  166.00
   3  -4   7  126.74    6.23
   3  -4   7  137.41    6.63
  -3  -4  -7  127.29   13.30
   3   4   7  156.24   13.75
   3   4   7  140.39   12.26
   3  -4   8 1682.94   70.70
   3  -4   8 1661.02   69.95
  -3  -4  -8 1626.64   70.84
   3   4   8 1675.47   72.74
   3   4   8 1726.28   74.63
   3  -4   9  117.13    7.07
   3  -4   9  120.77    7.32
  -3  -4  -9  125.95   13.30
   3   4   9  144.28   13.60
   3   4   9  131.83   12.06
   3  -4  10  245.02   12.16
   3  -4  10  254.38   12.75
  -3  -4 -10  289.71   17.69
   3   4  10  317.31   19.53
   3   4  10  258.82   17.59
   3  -4  11  256.92   13.60
   3  -4  11  288.06   14.60
  -3  -4 -11  313.97   20.13
   3   4  11  295.64   18.58
   3   4  11  305.25   20.03
   3  -4  12   74.03    7.37
   3  -4  12   87.83    7.42
  -3  -4 -12   94.61   13.20
   3   4  12   75.03   12.85
   3   4  12  108.76   14.20
   3  -4  13   -1.30    6.78
   3  -4  13   20.87    8.02
   3   4  13    0.65   10.06
   3   4  13   18.43   10.96
   3  -4  14  580.91   26.75
   3  -4  14  560.98   26.11
   3   4  14  605.82   30.54
   3   4  14  703.97   33.83
   3  -4  15   -3.99    9.07
   3  -4  15   14.60    8.12
   3   4  15   -7.87   10.81
   3   4  15    1.59   12.21
   3  -4  16 1018.33   44.89
   3  -4  16 1114.49   48.77
   3   4  16 1139.40   51.12
   3   4  16 1174.77   52.76
   3  -4  17   21.77    9.81
   3  -4  17    6.88   10.21
   3   4  17   38.26   12.55
   3   4  17   34.92   12.50
   3  -4  18  534.58   27.40
   3  -4  18  612.30   30.19
   3   4  18  537.56   27.90
   3   4  18  519.63   26.11
   3  -4  19   25.81   13.70
   3  -4  19   55.15   14.40
   3   4  19   41.10   11.81
   3   4  19    7.62   13.20
   3  -4  20   89.98   16.09
   3  -4  20  114.59   16.44
   3   4  20  145.28   14.60
   3   4  20   97.60   12.95
   3  -4  21   14.05   18.68
   3  -4  21   10.11   20.33
   3   4  21   21.02   12.21
   3   4  21   17.94   13.00
  -3  -5  21   10.66   18.53
  -3  -5  21   21.57   15.25
  -3   5  21   23.02   13.30
  -3   5  21   51.37   14.05
  -3  -5  20   -1.54   12.26
  -3  -5  20   -5.38   14.70
  -3   5  20    5.63   13.55
  -3   5  20    8.72   13.55
  -3  -5  19  205.56   18.18
  -3  -5  19  185.03   14.15
   3   5 -19  233.16   18.28
  -3   5  19  243.72   17.49
  -3   5  19  244.42   17.59
   3  -5 -18   -4.23   11.61
  -3  -5  18   12.75    9.32
  -3  -5  18   19.68   10.91
   3   5 -18   10.26   12.36
  -3   5  18    5.78   11.71
  -3   5  18   28.15   11.86
   3  -5 -17  719.41   34.92
  -3  -5  17  651.16   30.44
  -3  -5  17  683.54   32.18
   3   5 -17  586.89   29.39
  -3   5  17  671.58   32.63
  -3   5  17  690.02   32.53
   3  -5 -16    8.77   12.80
  -3  -5  16    9.27    7.52
  -3  -5  16   14.10    9.22
   3   5 -16    1.84   10.41
  -3   5  16   10.51   12.46
  -3   5  16   -1.44   10.86
   3  -5 -15 1321.24   58.49
  -3  -5  15 1217.12   52.86
  -3  -5  15 1268.43   54.85
   3   5 -15 1303.81   57.04
  -3   5  15 1380.53   60.73
  -3   5  15 1422.38   62.33
   3  -5 -14    7.07   11.26
  -3  -5  14    2.64    7.17
   3   5 -14    0.45    8.12
  -3   5  14    9.62   11.71
  -3   5  14   11.96   12.01
   3  -5 -13  201.67   15.05
  -3  -5  13  180.75   11.41
   3   5 -13  209.74   13.40
  -3   5  13  197.29   14.95
  -3   5  13  216.22   16.29
   3  -5 -12   12.26   10.06
  -3  -5  12   16.49    6.63
   3   5 -12   20.33    7.77
  -3   5  12    1.35   10.11
  -3   5  12   -1.59   11.66
   3  -5 -11  189.32   15.44
  -3  -5  11  202.47   12.65
   3   5 -11  192.96   12.70
  -3   5  11  172.08   14.35
  -3   5  11  207.70   16.49
   3  -5 -10  127.64   13.45
  -3  -5  10  144.88   10.46
   3   5 -10  144.78   11.56
  -3   5  10  129.14   13.10
  -3   5  10   97.05   12.36
   3  -5  -9  205.46   14.60
  -3  -5   9  229.08   13.35
   3   5  -9  200.88   13.10
  -3   5   9  177.96   14.70
  -3   5   9  224.59   14.90
   3  -5  -8   45.93    9.12
  -3  -5   8   49.52    7.37
   3   5  -8   51.46    7.47
  -3   5   8   48.28   10.41
  -3   5   8   51.12    9.22
   3  -5  -7 2124.85   90.77
  -3  -5   7 2019.23   85.29
   3   5  -7 2062.57   87.29
  -3   5   7 2090.97   89.33
  -3   5   7 2151.75   92.27
   3  -5  -6   12.36    8.27
  -3  -5   6    6.68    6.03
   3   5  -6   11.41    6.38
  -3   5   6   10.36    8.82
  -3   5   6   18.43    8.02
   3  -5  -5 1918.09   82.45
  -3  -5   5 1854.82   78.67
   3   5  -5 1824.43   77.72
  -3   5   5 1924.57   82.45
  -3   5   5 1867.28   79.96
   3  -5  -4  186.63   12.95
  -3  -5   4  155.74   11.11
   3   5  -4  163.61   11.31
  -3   5   4  157.33   11.96
  -3   5   4  188.52   13.15
   3  -5  -3 3422.18  143.58
  -3  -5   3 3381.82  141.84
   3   5  -3 3248.30  136.46
  -3   5   3 3301.11  138.85
  -3   5   3 3356.42  140.94
   3  -5  -2  201.62   12.50
  -3  -5   2  218.66   13.65
   3   5  -2  221.30   13.75
  -3   5   2  203.62   12.70
  -3   5   2  217.77   13.60
   3  -5  -1  313.52   15.94
  -3  -5   1  300.52   16.89
   3   5  -1  318.60   17.34
  -3   5   1  316.91   16.39
  -3   5   1  324.28   16.74
   3  -5   0   49.67    6.78
  -3  -5   0   36.42    8.82
   3   5   0   37.96    9.42
  -3   5   0   45.29    7.57
  -3   5   0   55.00    7.07
   3  -5   1  319.75   15.49
  -3  -5  -1  272.57   16.44
   3   5   1  290.90   17.09
  -3   5  -1  350.79   17.09
  -3   5  -1  319.85   15.79
   3  -5   2   24.26    4.78
  -3  -5  -2    5.98    9.67
   3   5   2   31.34    8.37
  -3   5  -2   14.75    5.68
  -3   5  -2   21.72    4.73
   3  -5   3 1026.30   43.34
  -3  -5  -3  956.56   43.34
   3   5   3 1002.39   44.84
  -3   5  -3 1028.80   43.59
  -3   5  -3 1020.33   43.24
  -3  -5  -4  436.18   23.32
   3   5   4  458.35   23.42
  -3  -5  -5 3468.51  146.37
   3   5   5 3303.11  139.45
   3   5   5 3250.80  137.41
  -3  -5  -6  125.25   13.30
  -3  -5  -7 1970.41   84.99
   3   5   7 2028.70   87.04
   3   5   7 1994.82   85.89
  -3  -5  -8  298.03   19.03
   3   5   8  233.76   16.34
   3   5   8  242.58   17.04
  -3  -5  -9  355.57   20.08
   3   5   9  336.49   19.83
   3   5   9  321.24   19.78
  -3  -5 -10  101.68   14.05
   3   5  10  107.16   12.85
   3   5  10   98.50   13.65
  -3  -5 -11   12.90   12.41
   3   5  11   11.46   11.46
   3   5  11   -1.54   12.16
   3   5  12  132.87   13.85
   3   5  12  109.66   13.55
   3  -5  13  105.47    6.63
   3  -5  13   99.14    6.63
   3   5  13  101.58   13.85
   3   5  13  127.04   14.30
   3   5  14  143.53   15.00
   3   5  14  162.76   15.84
   3   5  15  495.62   26.55
   3   5  15  529.10   27.20
   3  -5  16   58.64    9.02
   3  -5  16   76.03    8.82
   3   5  16   80.46   12.65
   3   5  16   61.43   11.76
   3  -5  17  718.41   32.88
   3  -5  17  719.41   32.48
   3   5  17  714.43   33.73
   3   5  17  719.91   34.63
   3  -5  18   24.06   11.41
   3  -5  18   12.06   11.26
   3   5  18   20.23   11.86
   3   5  18   18.98   13.25
   3  -5  19  129.63   15.00
   3  -5  19  110.55   14.25
   3   5  19  159.13   15.39
   3   5  19  157.78   15.54
   3  -5  20   46.43   15.94
   3  -5  20   70.65   17.94
   3   5  20   68.70   13.55
   3   5  20   73.34   14.50
  -3  -6  20   -0.75   20.08
  -3  -6  20   21.87   15.59
  -3   6  20   62.77   15.20
  -3   6  20   13.05   15.44
  -3  -6  19   21.52   17.44
  -3  -6  19   29.74   14.20
  -3   6  19   29.89   13.50
  -3   6  19    5.38   13.55
  -3  -6  18  567.46   28.40
  -3  -6  18  560.48   29.99
   3   6 -18  578.42   30.29
  -3   6  18  595.36   30.29
  -3   6  18  570.94   28.20
  -3  -6  17   61.48   13.90
  -3  -6  17   62.82   11.21
   3   6 -17   58.09   14.80
  -3   6  17   51.32   13.40
  -3   6  17   80.56   13.10
   3  -6 -16  848.94   39.71
  -3  -6  16  906.74   40.95
  -3  -6  16  824.03   37.12
   3   6 -16  807.09   37.81
  -3   6  16  836.49   38.86
  -3   6  16  841.47   39.36
   3  -6 -15   63.27   12.16
  -3  -6  15   42.10   10.71
  -3  -6  15   53.46    8.77
   3   6 -15   51.17   10.91
  -3   6  15   22.67   12.41
  -3   6  15   43.59   10.51
   3  -6 -14  510.66   26.65
  -3  -6  14  450.73   21.92
   3   6 -14  483.81   24.41
  -3   6  14  484.56   25.36
  -3   6  14  493.57   25.66
   3  -6 -13  131.23   14.50
  -3  -6  13  148.91   10.41
   3   6 -13  151.31   12.41
  -3   6  13  116.58   13.55
  -3   6  13  130.93   14.40
   3  -6 -12  381.48   22.22
  -3  -6  12  370.37   18.43
   3   6 -12  417.05   21.37
  -3   6  12  323.58   19.83
  -3   6  12  375.45   21.22
   3  -6 -11    1.30   10.36
  -3  -6  11   24.81    7.02
   3   6 -11   13.70    8.92
  -3   6  11   42.85   12.01
  -3   6  11    6.08   11.01
   3  -6 -10   -9.02   10.16
  -3  -6  10   -0.80    6.68
   3   6 -10    2.54    8.02
  -3   6  10    8.77   11.56
  -3   6  10    6.08   10.91
   3  -6  -9  124.10   13.00
  -3  -6   9  159.13   10.56
   3   6  -9  140.34   10.76
  -3   6   9  124.25   12.50
  -3   6   9  140.00   13.05
   3  -6  -8  896.27   40.95
  -3  -6   8  880.83   39.06
   3   6  -8  814.07   36.32
  -3   6   8  861.90   39.41
  -3   6   8  874.85   40.16
   3  -6  -7   28.40    9.72
  -3  -6   7   21.72    7.67
   3   6  -7    6.43    6.73
  -3   6   7    5.03    9.27
  -3   6   7   29.10    9.72
   3  -6  -6 1613.69   69.30
  -3  -6   6 1613.69   68.85
   3   6  -6 1670.49   71.54
  -3   6   6 1566.36   67.96
  -3   6   6 1577.32   68.35
   3  -6  -5   15.00    7.97
  -3  -6   5   12.01    7.27
   3   6  -5   13.50    6.63
  -3   6   5    7.97    8.57
  -3   6   5   10.66    8.57
   3  -6  -4 1944.50   82.85
  -3  -6   4 2064.57   87.63
   3   6  -4 1953.97   83.35
  -3   6   4 1950.98   83.55
  -3   6   4 1906.14   81.51
   3  -6  -3   65.46    8.77
  -3  -6   3   68.85    9.96
   3   6  -3   47.48    8.17
  -3   6   3   52.31    8.92
  -3   6   3   62.57    9.62
   3  -6  -2  641.19   29.34
  -3  -6   2  727.38   33.48
   3   6  -2  696.99   32.33
  -3   6   2  703.47   32.03
  -3   6   2  668.59   30.79
   3  -6  -1  307.24   16.74
  -3  -6   1  356.57   19.03
   3   6  -1  346.00   18.73
  -3   6   1  336.49   17.49
  -3   6   1  340.47   17.64
   3  -6   0   47.93    7.47
  -3  -6   0   53.46   10.41
   3   6   0   59.24    9.96
  -3   6   0   49.47    8.12
  -3   6   0   48.53    7.37
   3  -6   1  134.76    9.12
  -3  -6  -1  116.03   12.01
   3   6   1  127.49   11.66
  -3   6  -1  125.25    8.67
  -3   6  -1  137.80    9.17
  -3  -6  -2  394.83   21.02
   3   6   2  387.55   20.58
  -3   6  -2  441.66   20.08
  -3   6  -2  451.72   20.68
  -3  -6  -3    4.14   10.51
   3   6   3   -4.73    8.92
  -3   6  -3    7.42    3.69
  -3   6  -3    9.52    4.33
  -3  -6  -4 1162.81   51.96
   3   6   4 1143.88   51.02
   3   6   4 1145.87   51.12
  -3  -6  -5   13.75   10.61
   3   6   5   32.23   10.16
   3   6   5   12.80    9.76
  -3  -6  -6  709.94   34.13
   3   6   6  685.03   32.88
   3   6   6  645.18   31.29
  -3  -6  -7   -5.13   10.61
   3   6   7   12.85    9.86
   3   6   7   21.52   10.86
  -3  -6  -8  746.81   35.97
   3   6   8  723.40   34.97
   3   6   8  758.27   36.42
  -3  -6  -9  611.80   31.04
   3   6   9  598.35   29.79
   3   6   9  596.35   30.54
  -3  -6 -10  871.86   41.65
   3   6  10  872.86   40.85
   3   6  10  864.89   40.60
  -3  -6 -11  445.89   25.01
   3   6  11  521.12   26.85
   3   6  11  494.47   25.96
   3   6  12   23.32   11.01
   3   6  12   31.09   11.06
   3   6  13   79.76   12.01
   3   6  13   69.10   12.36
   3   6  14  384.57   21.07
   3   6  14  368.72   22.37
   3   6  15    5.58   10.96
   3   6  15   -1.79   12.31
   3   6  16  451.82   24.96
   3   6  16  510.16   26.16
   3   6  17   21.42   12.85
   3   6  17   41.40   13.10
   3   6  18  337.19   20.43
   3   6  18  394.68   22.72
   3   6  19    7.87   11.91
   3   6  19   27.55   14.05
  -3  -7  19  241.73   22.77
  -3  -7  19  241.23   18.33
  -3   7  19  253.54   18.63
  -3   7  19  237.89   18.63
  -3  -7  18    3.24   14.55
  -3  -7  18   30.89   12.55
  -3   7  18   20.97   14.00
  -3   7  18   12.31   13.65
  -3  -7  17  548.53   26.55
  -3  -7  17  546.53   27.90
  -3   7  17  617.78   31.29
  -3   7  17  568.45   28.95
  -3  -7  16   14.40    9.57
  -3  -7  16    1.15   12.31
   3   7 -16   15.25   12.85
  -3   7  16   21.32   12.90
  -3   7  16   -6.03   11.06
  -3  -7  15  709.45   32.03
  -3  -7  15  733.36   33.68
   3   7 -15  720.90   34.13
  -3   7  15  733.86   34.63
  -3   7  15  756.78   36.17
  -3  -7  14   77.17    9.17
  -3  -7  14   85.04   11.46
   3   7 -14   59.73   11.11
  -3   7  14   49.77   13.20
  -3   7  14   76.28   11.61
   3  -7 -13  404.99   22.27
  -3  -7  13  364.49   18.73
   3   7 -13  389.60   20.18
  -3   7  13  344.66   19.63
  -3   7  13  399.46   22.77
   3  -7 -12   90.08   11.31
  -3  -7  12  116.53    9.52
   3   7 -12  109.61   10.51
  -3   7  12   97.75   12.06
  -3   7  12   99.49   12.60
   3  -7 -11  233.21   17.69
  -3  -7  11  215.27   12.95
   3   7 -11  242.78   14.75
  -3   7  11  225.39   16.39
  -3   7  11  263.20   17.79
   3  -7 -10  232.06   17.44
  -3  -7  10  274.41   14.70
   3   7 -10  277.95   15.84
  -3   7  10  223.84   15.94
  -3   7  10  219.71   16.29
   3  -7  -9  210.14   15.34
  -3  -7   9  199.88   12.36
   3   7  -9  216.62   14.25
  -3   7   9  208.35   14.95
  -3   7   9  219.31   16.59
   3  -7  -8  124.40   13.35
  -3  -7   8  129.53   10.16
   3   7  -8  139.75   11.61
  -3   7   8  126.69   13.85
  -3   7   8  110.85   13.10
   3  -7  -7 1314.27   57.54
  -3  -7   7 1293.34   55.65
   3   7  -7 1233.56   53.51
  -3   7   7 1377.04   60.63
  -3   7   7 1405.94   61.73
   3  -7  -6   68.10   10.81
  -3  -7   6   62.08    9.52
   3   7  -6   58.29    8.47
  -3   7   6   66.06   10.11
  -3   7   6   42.95    9.72
   3  -7  -5 1489.64   65.07
  -3  -7   5 1503.59   64.97
   3   7  -5 1407.93   60.88
  -3   7   5 1348.15   58.84
  -3   7   5 1370.57   59.54
   3  -7  -4   45.88    9.12
  -3  -7   4   43.54    8.97
   3   7  -4   26.65    8.27
  -3   7   4   35.97    8.77
  -3   7   4   30.69    8.62
   3  -7  -3  737.84   33.88
  -3  -7   3  746.81   34.48
   3   7  -3  752.29   34.43
  -3   7   3  681.55   31.29
  -3   7   3  726.38   33.38
   3  -7  -2  195.65   12.85
  -3  -7   2  197.24   14.55
   3   7  -2  195.94   13.50
  -3   7   2  196.14   13.25
  -3   7   2  176.32   12.26
  -3  -7   1  182.39   13.20
   3   7  -1  219.06   14.20
  -3   7   1  204.31   12.85
  -3   7   1  234.56   13.85
  -3  -7   0  146.67   12.60
   3   7   0  168.89   12.70
  -3   7   0  146.17   10.81
  -3   7   0  172.33   11.41
  -3  -7  -1    3.14    9.22
   3   7   1    7.97    7.92
  -3   7  -1   10.06    7.27
  -3   7  -1  -11.26    5.98
  -3  -7  -2  307.39   18.33
   3   7   2  255.58   16.09
   3   7   2  305.75   17.59
  -3   7  -2  311.33   15.44
  -3   7  -2  268.48   13.20
  -3  -7  -3  352.58   20.68
   3   7   3  351.24   19.58
   3   7   3  352.23   19.68
  -3   7  -3  391.59   17.69
  -3   7  -3  363.99   16.34
  -3  -7  -4   58.44   10.86
   3   7   4   56.35   10.46
   3   7   4   49.17   10.26
  -3  -7  -5  358.21   20.03
   3   7   5  320.55   18.53
   3   7   5  346.05   19.33
  -3  -7  -6    1.25   10.56
   3   7   6   -7.17   10.36
   3   7   6   10.51   10.91
  -3  -7  -7  874.85   41.20
   3   7   7  907.73   42.50
   3   7   7  905.24   42.30
  -3  -7  -8  365.38   22.37
   3   7   8  332.60   20.48
   3   7   8  368.67   22.02
  -3  -7  -9  693.00   34.68
   3   7   9  754.78   36.27
   3   7   9  648.66   32.18
  -3  -7 -10  394.18   23.96
   3   7  10  312.47   19.93
   3   7  10  311.13   20.78
   3   7  11   48.97   13.15
   3   7  11   35.12   12.36
   3   7  12   38.06   13.00
   3   7  12   74.98   12.85
   3   7  13   78.77   13.45
   3   7  13  101.93   12.85
   3   7  14   19.73   12.70
   3   7  14   10.71   10.96
   3   7  15  449.48   25.26
   3   7  15  474.99   24.21
   3   7  16   27.00   12.70
   3   7  16    6.78   13.85
   3   7  17  691.01   33.98
   3   7  17  601.33   30.04
   3   7  18   14.25   12.41
   3   7  18   18.78   13.65
  -3   8  18  214.73   17.94
  -3   8  18  219.21   16.24
  -3   8  17   26.80   12.65
  -3   8  17   18.28   14.15
  -3   8  16  463.33   25.61
  -3   8  16  540.06   27.25
  -3   8  15   68.30   14.20
  -3   8  15   59.93   11.86
   3   8 -14  511.66   24.11
  -3   8  14  484.85   25.66
  -3   8  14  482.36   25.56
  -3  -8  13  113.74    8.87
  -3  -8  13  103.18    8.77
   3   8 -13  111.30    9.81
  -3   8  13  104.87   12.70
  -3   8  13  105.37   13.80
  -3  -8  12   83.15    8.32
   3   8 -12  102.53    9.32
  -3   8  12  118.62   13.65
  -3   8  12   96.15   14.40
  -3  -8  11  144.03   10.81
   3   8 -11   88.88    9.27
  -3   8  11   81.31   12.75
  -3   8  11   87.19   12.06
  -3  -8  10    7.37    7.72
   3   8 -10    1.74    8.22
  -3   8  10   18.63   11.81
  -3   8  10   26.80   12.31
  -3  -8   9  143.93   10.81
   3   8  -9  111.00   10.56
  -3   8   9  116.93   13.45
  -3   8   9  144.53   14.40
  -3  -8   8  370.42   18.83
   3   8  -8  393.43   20.38
  -3   8   8  394.68   22.22
  -3   8   8  398.47   21.97
  -3  -8   7   34.58    8.27
   3   8  -7   45.19    9.72
  -3   8   7   37.12   10.96
  -3   8   7   39.86   11.86
  -3  -8   6 1107.51   48.92
   3   8  -6  953.57   42.40
  -3   8   6 1047.23   47.13
  -3   8   6 1070.65   47.93
  -3  -8   5   19.28   10.11
   3   8  -5   23.52    9.72
  -3   8   5   29.74   10.91
  -3   8   5   43.09   10.76
  -3  -8   4  999.40   44.84
   3   8  -4 1011.86   45.44
  -3   8   4  926.66   42.35
  -3   8   4  958.05   43.49
  -3  -8   3   24.16   10.61
   3   8  -3   39.56   10.86
  -3   8   3   23.37    9.52
  -3   8   3   30.79   10.31
  -3  -8   2  560.98   27.70
   3   8  -2  535.07   27.10
  -3   8   2  553.51   26.85
  -3   8   2  542.55   26.70
  -3  -8   1  809.09   38.11
   3   8  -1  864.39   40.01
  -3   8   1  734.36   33.98
  -3   8   1  833.00   37.86
  -3  -8   0   26.36   11.86
   3   8   0    4.58    9.67
   3   8   0   27.50   11.76
  -3   8   0   30.94    8.62
  -3   8   0    5.63    8.87
  -3  -8  -1  169.09   15.10
   3   8   1  170.04   14.90
   3   8   1  158.13   13.75
  -3  -8  -2   81.81   12.41
   3   8   2  111.50   12.95
   3   8   2  102.28   12.90
  -3   8  -2   99.09    8.37
  -3   8  -2  108.01    9.47
  -3  -8  -3  247.11   17.54
   3   8   3  238.29   16.54
   3   8   3  262.70   17.94
  -3   8  -3  292.45   14.05
  -3   8  -3  285.02   13.75
  -3  -8  -4  265.44   19.23
   3   8   4  258.02   18.18
   3   8   4  251.79   17.84
  -3  -8  -5   34.58   12.55
   3   8   5   14.50   11.96
   3   8   5    8.47   12.46
  -3  -8  -6  891.29   42.35
   3   8   6  744.82   36.32
   3   8   6  819.05   39.06
  -3  -8  -7   -0.50   11.96
   3   8   7    3.39   11.31
   3   8   7   -6.73   11.11
  -3  -8  -8  834.99   40.26
   3   8   8  769.73   37.22
   3   8   8  725.39   34.68
  -3  -8  -9  139.75   16.24
   3   8   9  119.67   13.15
   3   8   9  130.33   14.75
   3   8  10  266.04   19.13
   3   8  10  275.06   19.48
   3   8  11  250.40   16.94
   3   8  11  253.34   18.73
   3   8  12   36.07   12.11
   3   8  12    1.59   11.41
   3   8  13   15.15   11.96
   3   8  13   25.16   12.16
   3   8  14  112.89   13.95
   3   8  14  106.96   15.54
   3   8  15  -16.99   13.40
   3   8  15   -6.28   13.30
   3   8  16  371.41   21.62
   3   8  16  372.26   22.17
   3   8  17    7.12   13.10
   3   8  17   29.99   12.16
  -3   9  17  181.10   16.94
  -3   9  17  153.75   14.85
  -3   9  16  -15.54   13.55
  -3   9  16  -10.26   11.71
  -3   9  15  351.83   21.62
  -3   9  15  359.36   22.42
  -3   9  14   52.01   14.55
  -3   9  14   31.29   13.90
  -3   9  13  135.76   14.10
  -3   9  13  127.49   14.20
  -3   9  12   27.85   12.95
  -3   9  12   47.68   13.00
  -3   9  11   -2.69   11.11
  -3   9  11    5.03   12.60
  -3  -9  10  135.91    9.52
   3   9 -10  140.20    9.37
  -3   9  10  135.26   13.50
  -3   9  10  167.60   15.89
  -3  -9   9  110.25   10.81
   3   9  -9  164.61   11.81
  -3   9   9  115.98   13.90
  -3   9   9  118.42   14.20
  -3  -9   8  113.04   11.81
   3   9  -8   93.91   10.66
  -3   9   8  109.41   13.15
  -3   9   8   98.20   13.20
  -3  -9   7  679.55   31.69
   3   9  -7  708.45   32.73
  -3   9   7  709.45   34.33
  -3   9   7  715.92   34.53
  -3  -9   6   -9.52   10.11
   3   9  -6    3.69    8.97
   3   9  -6   -9.81   10.51
  -3   9   6   21.22   10.96
  -3   9   6   -0.30   11.96
  -3  -9   5  912.22   41.55
   3   9  -5  869.37   39.11
   3   9  -5  812.57   37.22
  -3   9   5  822.54   38.11
  -3   9   5  789.16   37.02
  -3  -9   4   25.71   11.31
   3   9  -4   -7.92   10.61
   3   9  -4   20.33   10.41
  -3   9   4    5.73   11.16
  -3   9   4    7.12    9.81
  -3  -9   3  448.44   23.71
   3   9  -3  422.78   22.92
   3   9  -3  480.27   24.91
  -3   9   3  389.75   20.87
  -3   9   3  422.88   22.67
  -3  -9   2  128.49   13.85
   3   9  -2  105.82   12.60
   3   9  -2  131.63   14.10
  -3   9   2   87.09   11.31
  -3   9   2  113.24   11.96
  -3  -9   1  175.67   15.39
   3   9  -1  174.97   15.64
   3   9  -1  188.92   15.10
  -3   9   1  150.26   12.85
  -3   9   1  170.09   14.20
  -3  -9   0  133.12   14.40
   3   9   0  138.45   14.00
   3   9   0  137.26   14.30
  -3   9   0  166.60   13.40
  -3  -9  -1   57.24   13.40
   3   9   1   57.54   12.80
   3   9   1   44.59   11.86
  -3   9  -1   38.91    9.22
  -3   9  -1   31.84    9.27
  -3  -9  -2  215.32   17.74
   3   9   2  276.70   18.63
   3   9   2  270.23   18.43
  -3   9  -2  277.40   15.44
  -3  -9  -3  252.64   17.84
   3   9   3  283.73   18.78
  -3   9  -3  295.79   14.35
  -3   9  -3  313.52   14.85
  -3  -9  -4   31.64   13.70
   3   9   4   18.33   12.50
   3   9   4   25.46   11.81
  -3  -9  -5  965.03   44.74
   3   9   5  901.26   42.20
   3   9   5  991.93   45.69
  -3  -9  -6  -16.19   13.50
   3   9   6    3.19   10.76
   3   9   6  -18.13   12.36
  -3  -9  -7  935.63   43.89
   3   9   7  945.60   43.89
   3   9   7  966.52   45.09
  -3  -9  -8   79.91   15.05
   3   9   8   81.86   14.00
   3   9   8   66.11   14.80
   3   9   9  127.89   14.10
   3   9   9  117.18   13.75
   3   9  10   70.10   13.30
   3   9  10   86.04   13.95
   3   9  11   47.53   11.91
   3   9  11   43.79   13.50
   3   9  12   17.39   13.05
   3   9  12    9.12   12.41
   3   9  13   37.22   14.00
   3   9  13   20.28   13.70
   3   9  14   19.63   14.15
   3   9  14  -12.16   14.55
   3   9  15  143.48   15.74
   3   9  15  156.24   15.89
   3   9  16   12.70   14.05
   3   9  16   -0.90   14.35
  -3  10  15   15.94   13.40
  -3  10  15  -28.70   14.40
  -3  10  14   91.52   14.55
  -3  10  14  107.31   15.99
  -3  10  13    9.27   13.30
  -3  10  13    9.62   13.75
  -3  10  12   57.24   14.10
  -3  10  12   40.50   13.50
  -3  10  11  216.32   17.04
  -3  10  11  203.37   16.79
  -3  10  10   11.56   11.61
  -3  10  10    6.38   12.90
  -3  10   9   33.03   12.21
  -3  10   9   34.97   11.01
  -3 -10   8  117.98   10.51
   3  10  -8  141.54   11.36
   3  10  -8  169.49   13.00
  -3  10   8  164.71   15.05
  -3  10   8  141.29   14.15
  -3 -10   7   12.11   10.11
   3  10  -7    5.53    9.96
   3  10  -7    4.78   10.56
  -3  10   7   -6.08   11.81
  -3  10   7    4.88   10.96
  -3 -10   6  272.52   17.19
   3  10  -6  267.99   17.44
   3  10  -6  258.47   17.19
  -3  10   6  320.94   20.13
  -3  10   6  292.00   18.53
  -3 -10   5    5.53   12.85
   3  10  -5   17.94   11.46
   3  10  -5    7.32   11.66
  -3  10   5  -15.10   12.16
  -3  10   5   34.23   11.36
  -3 -10   4  291.65   18.98
   3  10  -4  333.75   20.08
   3  10  -4  333.25   20.18
  -3  10   4  334.74   20.13
  -3  10   4  296.08   18.38
  -3 -10   3    2.79   12.36
   3  10  -3   -3.64   11.31
   3  10  -3   19.63   11.26
  -3  10   3   25.71   11.36
  -3  10   3    6.68   10.91
  -3 -10   2  255.93   18.33
   3  10  -2  276.75   18.53
   3  10  -2  257.42   18.28
  -3  10   2  285.02   18.48
  -3  10   2  287.32   18.63
  -3 -10   1  181.99   16.49
   3  10  -1  145.87   14.55
   3  10  -1  196.44   16.39
  -3  10   1  136.61   13.10
  -3 -10   0   -5.38   12.46
   3  10   0   18.53   12.46
   3  10   0    7.92   12.95
  -3  10   0   10.51   10.56
  -3  10   0    2.44    9.96
  -3 -10  -1   32.38   13.50
   3  10   1   21.17   12.50
   3  10   1   15.25   11.86
  -3  10  -1   39.26   10.51
  -3  10  -1    3.69    9.37
  -3 -10  -2   88.43   14.25
   3  10   2   74.98   13.70
   3  10   2  105.92   14.20
  -3  10  -2   99.89   10.31
  -3  10  -2  107.76   10.31
  -3 -10  -3   20.53   14.65
   3  10   3   35.02   12.36
   3  10   3   53.76   13.30
  -3 -10  -4  549.52   29.19
   3  10   4  490.19   26.80
   3  10   4  537.07   28.05
  -3 -10  -5    4.09   13.45
   3  10   5   14.05   12.06
   3  10   5    3.84   12.65
  -3 -10  -6  348.10   22.72
   3  10   6  336.34   21.12
   3  10   6  327.07   20.83
   3  10   7   23.86   12.85
   3  10   7   -4.63   11.51
   3  10   8  254.88   18.18
   3  10   8  261.56   19.08
   3  10   9   67.76   13.45
   3  10   9   54.35   13.90
   3  10  10   59.34   14.40
   3  10  10   88.23   15.15
   3  10  11   28.30   14.25
   3  10  11   39.21   14.90
   3  10  12   46.28   14.25
   3  10  12   35.02   13.35
   3  10  13   18.53   12.85
   3  10  13   22.92   14.55
   3  10  14   93.66   15.44
   3  10  14   90.97   14.75
  -3  11  13  124.40   16.14
  -3  11  13  103.08   16.49
  -3  11  12   56.80   15.44
  -3  11  12   76.47   15.49
  -3  11  11   14.95   13.80
  -3  11  11    9.02   14.00
  -3  11  10   73.44   14.35
  -3  11  10   80.86   15.00
  -3  11   9   26.01   12.65
  -3  11   9   27.70   13.40
  -3  11   8   58.89   13.50
  -3  11   8   74.58   14.15
   3  11  -7  100.44   14.35
   3  11  -7   78.52   11.41
  -3  11   7   91.32   14.50
  -3  11   7   99.04   14.65
   3  11  -6   -0.50   11.96
   3  11  -6    9.32   14.75
  -3  11   6  -15.74   13.15
  -3  11   6    8.67   13.05
   3  11  -5  170.19   17.59
   3  11  -5  156.54   14.50
  -3  11   5  185.13   16.64
  -3  11   5  142.64   14.45
  -3 -11   4   33.98   13.70
   3  11  -4   26.45   13.75
   3  11  -4    5.38   13.70
  -3  11   4   27.55   13.80
  -3  11   4   25.56   12.55
  -3 -11   3  177.91   16.79
   3  11  -3  200.93   17.09
   3  11  -3  208.00   18.04
  -3  11   3  195.94   16.14
  -3  11   3  197.99   16.89
  -3 -11   2   63.02   14.85
   3  11  -2   84.10   14.75
   3  11  -2   70.89   15.15
  -3  11   2   82.65   13.60
  -3  11   2   94.66   14.70
  -3 -11   1  115.48   15.10
   3  11  -1  114.29   15.25
   3  11  -1  110.10   16.04
  -3  11   1  115.63   14.85
  -3  11   1  149.36   15.69
  -3 -11   0   54.20   13.70
   3  11   0   84.60   14.40
   3  11   0   56.45   14.55
  -3  11   0   65.17   12.50
  -3  11   0   60.63   12.31
  -3 -11  -1   -1.20   12.65
   3  11   1    1.10   12.46
   3  11   1  -12.46   13.45
  -3  11  -1   -1.84   11.36
  -3  11  -1   -5.18   10.51
  -3 -11  -2   37.42   13.80
   3  11   2   73.44   14.35
   3  11   2   57.44   13.50
  -3  11  -2   68.75   10.16
  -3  11  -2   56.90   10.51
   3  11   3  113.14   14.40
   3  11   3   81.26   14.55
   3  11   4   -8.92   14.35
   3  11   4    6.28   14.00
   3  11   5  201.77   17.59
   3  11   5  189.97   17.84
   3  11   6   30.54   14.30
   3  11   6   -4.18   13.25
   3  11   7  197.54   17.49
   3  11   7  206.56   17.89
   3  11   8   39.81   14.50
   3  11   8   -1.49   13.95
   3  11   9  111.10   16.59
   3  11   9  102.93   16.34
   3  11  10   32.23   14.15
   3  11  10   59.49   16.19
   3  11  11    9.27   14.90
   3  11  11    2.94   15.20
   3  11  12   26.60   15.84
   3  11  12   15.69   15.54
  -3  12  11   38.51   15.84
  -3  12  10    4.68   14.40
  -3  12  10    0.65   14.60
  -3  12   9   22.37   16.04
  -3  12   9   16.39   14.65
  -3  12   8   39.96   14.00
  -3  12   8   51.76   14.90
  -3  12   7   -7.17   15.05
  -3  12   7    6.23   14.75
   3  12  -6  124.50   16.49
   3  12  -6  124.35   18.58
   3  12  -5   23.71   16.64
   3  12  -5   25.36   14.20
  -3  12   5   -8.12   14.45
  -3  12   5   -2.99   15.34
   3  12  -4  154.59   17.04
   3  12  -4  137.41   19.63
  -3  12   4  149.56   17.89
  -3  12   4  168.09   17.99
   3  12  -3    1.69   17.44
   3  12  -3    6.13   17.54
  -3  12   3   17.89   15.10
  -3  12   3   24.36   16.09
   3  12  -2  120.47   18.53
   3  12  -2   99.24   17.59
  -3  12   2  169.99   18.58
  -3  12   2  160.82   16.74
   3  12  -1  103.58   18.53
   3  12  -1  101.48   17.89
  -3  12   1   83.90   14.95
  -3  12   1  102.28   18.63
   3  12   0   -6.97   15.54
   3  12   0   18.43   15.44
  -3  12   0    9.67   14.75
  -3  12   0   -9.91   13.00
   3  12   1   68.35   15.59
   3  12   1   62.38   16.14
  -3  12  -1   43.05   14.85
  -3  12  -1   79.91   13.00
   3  12   2   56.94   15.64
   3  12   2   64.17   16.44
   3  12   3    0.80   15.79
   3  12   3   13.65   15.00
   3  12   4   80.56   16.04
   3  12   4   97.00   15.89
   3  12   5   -0.75   15.94
   3  12   5   20.23   14.75
   3  12   6  110.60   16.59
   3  12   6  117.43   16.09
   3  12   7   23.57   15.74
   3  12   7   23.52   15.29
   3  12   8  102.73   16.39
   3  12   8   76.18   16.54
   3  12   9    9.37   15.44
   3  12   9   17.84   15.84
   3  12  10   36.17   16.29
   3  12  10   14.10   18.93
  -3  13   7   39.61   21.37
  -3  13   6   -7.02   19.38
  -3  13   6   13.35   18.23
   3  13  -5   45.09   15.39
   3  13  -5   40.50   12.90
  -3  13   5   43.84   19.13
   3  13  -4    1.05   17.64
   3  13  -4   22.12   18.18
  -3  13   4   -2.74   19.23
  -3  13   4    8.87   17.84
   3  13  -3   88.08   22.42
   3  13  -3   68.25   19.13
  -3  13   3  129.18   19.93
  -3  13   3  135.71   20.58
   3  13  -2    8.27   22.27
   3  13  -2   23.81   21.37
  -3  13   2  -10.31   19.83
  -3  13   2    9.86   19.68
   3  13  -1   47.93   21.32
   3  13  -1   29.39   20.43
  -3  13   1   13.60   17.89
  -3  13   1    6.83   18.18
   3  13   0   34.18   19.13
   3  13   0   44.99   21.12
  -3  13   0   41.65   15.59
  -3  13   0   -1.89   16.69
   3  13   1   20.18   19.38
   3  13   1   -1.84   18.23
  -3  13  -1   -2.19   10.41
  -3  13  -1    3.09   11.51
   3  13   2   23.96   18.88
   3  13   2   15.64   19.48
   3  13   3    9.62   18.38
   3  13   3   46.83   20.03
   3  13   4  -14.20   18.88
   3  13   4   28.35   18.53
   3  13   5   82.50   18.53
   3  13   5   78.92   18.68
   3  13   6   74.93   19.38
   4   0 -23    9.07   14.00
  -4   0  23   -0.10   15.84
  -4   0  23    8.22   11.71
   4   0 -22  259.12   18.93
  -4   0  22  250.65   18.08
   4   0 -21   13.30   12.11
  -4   0  21  -12.46   11.01
  -4   0  21    7.37   11.36
   4   0 -20  588.88   29.39
  -4   0  20  573.93   27.85
  -4   0  20  610.30   29.49
   4   0 -19   -5.33   10.26
  -4   0  19   -6.03   10.56
  -4   0  19   -3.94   10.51
   4   0 -18  593.36   29.10
  -4   0  18  638.70   30.84
  -4   0  18  559.98   27.55
   4   0 -17   -7.02    9.72
  -4   0  17   -3.09    8.72
  -4   0  17  -17.44    8.92
   4   0 -16  439.47   23.42
  -4   0  16  425.17   22.27
  -4   0  16  505.18   26.55
   4   0 -15   -1.39    9.12
  -4   0  15   10.61    7.77
   4   0 -14  247.91   15.79
  -4   0  14  219.36   14.25
   4   0 -13  -16.59   10.41
  -4   0  13  -11.96    8.57
   4   0 -12  744.32   35.17
  -4   0  12  801.12   36.57
   4   0 -11    7.47    8.17
  -4   0  11    6.93    8.37
   4   0 -10 2144.78   91.77
  -4   0  10 2191.11   93.66
   4   0  -9    3.44    8.82
  -4   0   9   -7.97    7.92
   4   0  -8 4072.34  170.74
  -4   0   8 4416.60  184.98
   4   0  -7   -8.52    8.67
  -4   0   7   19.08    7.82
   4   0  -6  446.14   22.42
  -4   0   6  434.73   21.72
   4   0  -5    7.02    7.27
  -4   0   5   -5.83    7.52
   4   0  -4 1741.73   74.33
  -4   0   4 1810.98   77.27
   4   0  -3   -0.70    7.37
  -4   0   3  -12.50    7.82
   4   0  -2 2358.01   99.89
  -4   0   2 2491.53  105.07
   4   0  -1    2.99    7.67
  -4   0   1    8.42    7.42
   4   0   0 1830.41   78.12
  -4   0   0 1899.16   80.86
   4   0   1   -9.67    7.37
  -4   0  -1   -6.73    7.77
   4   0   2 1696.89   72.54
  -4   0  -2 1614.19   69.10
   4   0   3    0.85    7.92
  -4   0  -3   12.95    8.02
   4   0   4  687.03   31.29
  -4   0  -4  692.01   31.69
   4   0   5   -4.48    6.97
  -4   0  -5    6.97    8.37
   4   0   6  155.39   11.61
  -4   0  -6  168.74   12.31
   4   0   7    9.47    7.77
  -4   0  -7   -2.94    8.22
   4   0   8 1735.75   74.18
   4   0   8 1641.09   70.60
  -4   0  -8 1796.03   77.12
   4   0   9   -5.88    8.17
   4   0   9   -7.52    8.47
  -4   0  -9    8.17    9.07
   4   0  10  995.42   44.19
   4   0  10  883.32   39.81
  -4   0 -10  979.97   43.74
   4   0  11   13.00    9.07
   4   0  11   -2.84    9.22
  -4   0 -11    3.44    8.37
   4   0  12 1708.85   73.44
   4   0  12 1784.57   77.17
  -4   0 -12 1627.64   70.45
   4   0  13   -2.79    7.97
   4   0  13   -2.09    9.12
   4   0  14 1000.90   44.69
   4   0  14 1005.88   45.24
   4   0  15    1.39    9.91
   4   0  15   10.76   10.16
   4   0  16   96.45   11.66
   4   0  16   70.05   12.01
   4   0  17    6.48   10.16
   4   0  17  -11.71   10.31
   4   0  18   34.72   10.66
   4   0  18   30.34   11.16
   4   0  19  -15.69   10.41
   4   0  19  -22.42   12.21
   4   0  20  254.63   17.89
   4   0  20  300.32   19.08
   4   0  21   14.65   14.35
   4   0  21    1.15   12.95
   4  -1 -22   11.56   13.25
  -4  -1  22    4.73   11.86
  -4  -1  22  -14.35   12.80
   4   1 -22    1.15   13.90
  -4   1  22    8.52   11.71
  -4   1  22    6.88   12.70
   4  -1 -21  685.03   33.58
  -4  -1  21  706.46   33.53
  -4  -1  21  676.07   32.33
   4   1 -21  703.47   34.33
  -4   1  21  685.03   32.98
  -4   1  21  667.60   32.43
   4  -1 -20    7.12   11.31
  -4  -1  20   21.87   10.81
  -4  -1  20  -17.44   10.31
   4   1 -20   10.06   10.71
  -4   1  20   -4.38    9.32
  -4   1  20   10.61    9.76
  -4  -1  19  696.49   32.98
  -4  -1  19  599.84   29.39
   4   1 -19  598.35   29.49
  -4   1  19  651.16   31.19
  -4   1  19  632.72   30.74
   4  -1 -18    4.38    9.81
  -4  -1  18   23.27    8.97
  -4  -1  18   17.54    9.17
   4   1 -18    1.79   10.41
  -4   1  18    4.88    9.91
  -4   1  18    3.49    9.67
   4  -1 -17  552.01   27.90
  -4  -1  17  589.38   28.90
   4   1 -17  539.06   27.65
  -4   1  17  559.49   28.15
  -4   1  17  575.43   28.95
   4  -1 -16   17.74   10.21
  -4  -1  16    7.22    8.77
  -4   1  16    2.09    8.97
  -4   1  16   22.07   10.06
   4  -1 -15  100.99   12.21
  -4  -1  15   92.02   10.71
   4   1 -15   94.96   11.16
  -4   1  15  125.50   13.40
  -4   1  15   91.52   11.21
   4  -1 -14   19.83    9.67
  -4  -1  14    7.82    8.17
   4   1 -14    7.12    8.17
  -4   1  14    7.37   10.81
   4  -1 -13  455.31   24.51
  -4  -1  13  502.19   25.16
   4   1 -13  461.99   24.06
  -4   1  13  455.26   23.57
   4  -1 -12    5.88   10.26
  -4  -1  12    1.05    8.37
   4   1 -12   13.70    9.52
  -4   1  12   -0.35    9.02
   4  -1 -11 2715.22  115.24
  -4  -1  11 2906.04  123.16
   4   1 -11 2810.88  119.07
  -4   1  11 2822.84  119.82
   4  -1 -10   37.17   10.31
  -4  -1  10   62.62    8.82
   4   1 -10   64.07    9.96
  -4   1  10   66.11    9.86
   4  -1  -9 1556.40   67.46
  -4  -1   9 1594.76   68.90
   4   1  -9 1672.98   72.09
  -4   1   9 1638.60   71.04
   4  -1  -8  490.83   24.66
  -4  -1   8  535.07   26.01
   4   1  -8  521.62   25.46
  -4   1   8  486.90   24.51
   4  -1  -7 3007.17  126.74
  -4  -1   7 3151.65  132.92
   4   1  -7 3155.14  132.92
  -4   1   7 3024.61  127.59
   4  -1  -6   42.25    8.62
  -4  -1   6   53.76    8.82
   4   1  -6   57.09    8.42
  -4   1   6   49.27    8.72
   4  -1  -5   45.54    8.62
  -4  -1   5   39.71    7.97
   4   1  -5   72.19    8.52
  -4   1   5   47.83    8.52
   4  -1  -4   82.15   10.01
  -4  -1   4   80.21    8.47
   4   1  -4   91.02    9.62
  -4   1   4   88.33    9.62
   4  -1  -3  913.71   40.45
  -4  -1   3  971.00   42.95
   4   1  -3  900.26   40.16
  -4   1   3  953.57   42.25
   4  -1  -2  967.02   42.50
  -4  -1   2  955.56   42.20
   4   1  -2  961.04   42.55
  -4   1   2 1028.30   45.09
   4  -1  -1 3356.91  140.64
  -4  -1   1 3227.38  135.46
   4   1  -1 3365.38  141.09
  -4   1   1 3512.85  147.07
   4  -1   0   51.41    7.67
  -4  -1   0   42.90    8.82
   4   1   0   54.50    8.77
  -4   1   0   64.42    9.02
   4  -1   1 1408.93   60.68
  -4  -1  -1 1405.44   60.78
   4   1   1 1437.33   62.03
  -4   1  -1 1469.71   63.12
   4  -1   2  416.90   20.58
  -4  -1  -2  393.78   20.48
   4   1   2  425.47   21.12
  -4   1  -2  434.39   21.42
   4  -1   3  818.05   36.32
  -4  -1  -3  819.55   37.17
   4   1   3  858.41   38.26
  -4   1  -3  769.23   34.53
   4  -1   4  254.04   13.95
  -4  -1  -4  240.28   15.39
   4   1   4  228.48   14.60
  -4   1  -4  257.67   14.50
   4  -1   5  509.17   23.81
  -4  -1  -5  511.66   25.21
   4   1   5  587.39   28.30
  -4   1  -5  522.62   24.56
   4  -1   6   16.84    7.37
  -4  -1  -6   13.80    9.37
   4   1   6   17.39    8.82
  -4   1  -6   15.64    7.57
   4  -1   7  222.55   13.35
  -4  -1  -7  227.88   14.95
   4   1   7  192.96   13.30
  -4   1  -7  233.16   13.90
   4  -1   8    1.94    8.32
   4  -1   8    7.57    7.32
  -4  -1  -8    9.27    9.47
   4   1   8   -6.53    7.92
   4   1   8    6.18    9.76
  -4   1  -8   -3.94    7.82
   4  -1   9 2677.36  112.64
   4  -1   9 2562.27  108.26
  -4  -1  -9 2890.59  122.21
   4   1   9 2410.32  102.73
   4   1   9 2722.70  115.58
  -4   1  -9 2548.33  107.56
   4  -1  10   54.11    9.62
   4  -1  10   40.60    8.67
  -4  -1 -10   41.05   10.11
   4   1  10   66.16    9.91
   4   1  10   44.84   10.21
   4  -1  11 1317.26   57.09
   4  -1  11 1346.15   58.59
  -4  -1 -11 1459.74   63.57
   4   1  11 1456.76   63.37
   4   1  11 1375.55   60.18
  -4   1 -11 1271.92   55.45
   4  -1  12  109.41   10.16
   4  -1  12  117.38   10.81
  -4  -1 -12   94.51   10.71
   4   1  12  106.47   11.91
   4   1  12   95.26   11.46
   4  -1  13 1291.35   56.40
   4  -1  13 1220.61   54.01
  -4  -1 -13 1221.10   53.96
   4   1  13 1225.59   54.70
   4   1  13 1328.22   59.04
   4  -1  14    9.67   10.26
   4  -1  14   17.59    9.42
   4   1  14   28.65   10.71
   4   1  14   37.22   11.11
   4  -1  15  417.55   22.27
   4  -1  15  406.69   20.68
   4   1  15  486.25   25.26
   4   1  15  462.24   23.42
   4  -1  16   -2.74    9.81
   4  -1  16    8.67   10.11
   4   1  16    3.59    9.81
   4   1  16   26.80   11.41
   4  -1  17   14.75   10.16
   4  -1  17   20.83   10.56
   4   1  17   -0.85   10.16
   4   1  17   14.70   10.61
   4  -1  18    4.23   10.66
   4  -1  18    1.59   11.36
   4   1  18   13.90   11.91
   4   1  18   17.99   11.51
   4  -1  19  102.13   13.70
   4  -1  19   76.18   13.40
   4   1  19   98.99   13.05
   4   1  19   70.05   12.11
   4  -1  20   38.66   14.30
   4  -1  20   -9.76   13.10
   4   1  20  -14.45   11.31
   4   1  20   12.55   11.81
   4  -1  21  379.63   23.96
   4  -1  21  362.15   22.62
   4   1  21  364.39   22.12
   4   1  21  323.54   20.58
   4  -2 -22  353.08   21.82
  -4  -2  22  384.42   22.42
  -4  -2  22  356.42   22.57
   4   2 -22  375.60   23.71
  -4   2  22  315.26   19.98
  -4   2  22  383.42   22.07
   4  -2 -21    4.28   12.31
  -4  -2  21   -0.65   10.66
  -4  -2  21    1.35   11.51
   4   2 -21   -9.81   12.60
  -4   2  21   -0.90   12.31
  -4   2  21    5.58   12.21
   4  -2 -20  638.70   31.54
  -4  -2  20  654.64   31.59
  -4  -2  20  664.11   31.84
   4   2 -20  740.33   34.82
  -4   2  20  668.09   32.43
  -4   2  20  697.49   33.73
   4  -2 -19    0.75    9.62
  -4  -2  19   -0.10    9.81
  -4  -2  19    2.24    9.57
   4   2 -19   11.76    9.91
  -4   2  19   12.90   12.26
  -4   2  19    2.19    9.86
   4  -2 -18  496.71   26.36
  -4  -2  18  469.76   23.47
  -4  -2  18  452.12   23.66
   4   2 -18  473.59   24.26
  -4   2  18  554.50   26.75
  -4   2  18  468.76   25.51
   4  -2 -17   54.35   11.66
  -4  -2  17   59.14    9.52
  -4  -2  17   45.44    8.97
   4   2 -17   51.37   10.21
  -4   2  17   38.46   11.71
  -4   2  17   67.61   13.00
   4  -2 -16   18.13   11.46
  -4  -2  16   13.10    8.62
   4   2 -16   22.17    9.12
  -4   2  16   17.44   12.41
  -4   2  16   33.48   12.21
   4  -2 -15   40.01   11.11
  -4  -2  15   61.33    9.42
   4   2 -15   61.68    9.91
  -4   2  15   54.85   11.31
  -4   2  15   55.95   12.06
   4  -2 -14  237.49   17.19
  -4  -2  14  223.35   14.55
   4   2 -14  208.30   14.10
  -4   2  14  208.20   14.85
  -4   2  14  224.34   16.74
   4  -2 -13   31.29   11.71
  -4  -2  13   13.35    7.62
   4   2 -13   25.76    8.07
  -4   2  13    5.18    9.86
   4  -2 -12 1077.12   48.67
  -4  -2  12  969.01   43.14
   4   2 -12 1115.48   49.77
  -4   2  12 1085.09   48.82
   4  -2 -11   -1.74   10.26
  -4  -2  11   -0.70    7.27
   4   2 -11   17.94    8.77
  -4   2  11   14.40    8.47
   4  -2 -10 2853.73  121.11
  -4  -2  10 3145.18  132.52
   4   2 -10 3183.04  134.22
  -4   2  10 3238.34  137.16
   4  -2  -9  125.25   11.11
  -4  -2   9  154.79   11.46
   4   2  -9  138.80   11.61
  -4   2   9  123.41   12.16
   4  -2  -8 1408.43   61.58
  -4  -2   8 1566.86   67.36
   4   2  -8 1433.34   62.13
  -4   2   8 1460.74   63.72
   4  -2  -7  585.39   28.45
  -4  -2   7  529.59   25.21
   4   2  -7  589.88   27.95
  -4   2   7  586.39   28.25
   4  -2  -6  267.09   15.34
  -4  -2   6  273.76   15.20
   4   2  -6  260.66   15.25
  -4   2   6  277.85   16.39
   4  -2  -5  140.49   11.06
  -4  -2   5  147.82   11.01
   4   2  -5  132.12   10.71
  -4   2   5  125.05   11.01
   4  -2  -4   28.60    8.62
  -4  -2   4    3.59    7.62
   4   2  -4   12.41    7.67
  -4   2   4   20.18    8.32
   4  -2  -3  340.47   17.94
  -4  -2   3  339.28   17.59
   4   2  -3  331.46   17.59
  -4   2   3  338.48   17.99
   4  -2  -2 1411.92   60.83
  -4  -2   2 1390.99   59.98
   4   2  -2 1386.51   60.03
  -4   2   2 1408.93   60.63
   4  -2  -1  936.13   41.35
  -4  -2   1  937.62   41.40
   4   2  -1  921.68   41.15
  -4   2   1  958.55   42.15
   4  -2   0 2167.70   91.52
  -4  -2   0 2060.58   87.53
   4   2   0 2139.30   90.97
  -4   2   0 2220.51   93.76
   4  -2   1  757.77   33.58
  -4  -2  -1  739.34   33.83
   4   2   1  718.41   33.03
  -4   2  -1  808.59   35.87
   4  -2   2 2967.81  124.30
  -4  -2  -2 2882.12  121.51
   4   2   2 2897.57  122.46
  -4   2  -2 3077.92  128.94
   4  -2   3  264.15   14.30
  -4  -2  -3  239.44   15.20
   4   2   3  271.42   16.14
  -4   2  -3  286.67   15.20
   4  -2   4 2589.18  108.86
  -4  -2  -4 2506.97  106.17
   4   2   4 2750.60  116.28
  -4   2  -4 2582.20  108.41
   4  -2   5   83.50    7.87
  -4  -2  -5   93.21   10.96
   4   2   5  103.38   10.41
  -4   2  -5   76.03    7.92
   4  -2   6    5.58    5.43
  -4  -2  -6    8.77    9.67
   4   2   6    6.63    9.07
  -4   2  -6   -1.15    6.83
   4  -2   7  324.63   16.14
  -4  -2  -7  326.03   18.43
   4   2   7  369.77   19.98
  -4   2  -7  334.25   17.29
   4  -2   8  959.55   42.10
   4  -2   8  967.02   42.60
  -4  -2  -8 1026.30   46.33
   4   2   8 1098.05   48.77
   4   2   8  992.43   45.09
  -4   2  -8  953.57   41.75
   4  -2   9    1.89    7.32
   4  -2   9   -0.75    7.32
  -4  -2  -9    5.18    9.02
   4   2   9    6.53    9.67
   4   2   9    5.23    9.67
  -4   2  -9    8.07    7.57
   4  -2  10 1192.71   51.86
   4  -2  10 1173.28   50.67
  -4  -2 -10 1274.91   56.30
   4   2  10 1278.40   56.94
   4   2  10 1257.47   55.65
  -4   2 -10 1152.35   50.22
   4  -2  11   52.06    8.22
   4  -2  11   52.11    9.07
  -4  -2 -11   60.08    9.86
   4   2  11   50.17   11.06
   4   2  11   43.39   10.81
   4  -2  12 1397.97   60.83
   4  -2  12 1371.56   59.39
  -4  -2 -12 1411.92   61.98
   4   2  12 1194.70   53.16
   4   2  12 1374.05   60.53
   4  -2  13   83.00    9.57
   4  -2  13   73.34   10.06
  -4  -2 -13   91.52   12.21
   4   2  13   77.32   12.31
   4   2  13   62.28   10.61
   4  -2  14  743.32   34.33
   4  -2  14  766.74   34.58
   4   2  14  745.32   35.52
   4   2  14  823.04   38.51
   4  -2  15   38.26   10.56
   4  -2  15   42.45   11.26
   4   2  15   49.32   10.66
   4   2  15   35.07   10.26
   4  -2  16  101.98   11.36
   4  -2  16  106.92   11.81
   4   2  16  119.57   12.55
   4   2  16  121.41   13.50
   4  -2  17    8.47    9.91
   4  -2  17   18.48   11.01
   4   2  17    0.40    9.96
   4   2  17   11.11   11.81
   4  -2  18    5.33   12.06
   4  -2  18   27.20   12.21
   4   2  18   29.39   11.66
   4   2  18   27.90   12.01
   4  -2  19   45.39   12.90
   4  -2  19   69.95   13.85
   4   2  19   46.38   12.01
   4   2  19   49.77   12.85
   4  -2  20  367.03   22.87
   4  -2  20  332.65   21.72
   4   2  20  338.93   20.83
   4   2  20  293.04   18.63
   4  -2  21    3.94   16.39
   4  -2  21   37.37   16.09
   4   2  21   25.71   13.20
   4   2  21   45.44   13.55
   4  -3 -22   16.89   15.05
  -4  -3  22   16.74   12.31
  -4  -3  22   25.26   14.75
   4   3 -22   41.75   16.84
  -4   3  22   18.93   14.10
  -4   3  22   14.30   14.05
   4  -3 -21  640.69   32.48
  -4  -3  21  654.64   32.18
  -4  -3  21  622.26   31.54
   4   3 -21  609.31   30.74
  -4   3  21  634.71   31.94
  -4   3  21  594.86   30.39
   4  -3 -20   29.34   13.50
  -4  -3  20   13.50   10.66
  -4  -3  20    4.48   12.11
   4   3 -20   15.99   11.46
  -4   3  20   11.11   12.75
  -4   3  20    0.35   12.95
   4  -3 -19  285.67   18.98
  -4  -3  19  314.47   18.48
  -4  -3  19  276.60   17.39
   4   3 -19  258.32   16.49
  -4   3  19  237.54   17.79
  -4   3  19  296.73   19.53
   4  -3 -18   14.95   11.56
  -4  -3  18   -9.67    9.72
  -4  -3  18   -8.57    9.67
   4   3 -18   -5.13   11.11
  -4   3  18   14.15   12.60
  -4   3  18   -0.30   12.01
   4  -3 -17    5.83   12.11
  -4  -3  17   15.10    9.96
  -4  -3  17   16.04    9.22
   4   3 -17   -2.14   10.51
  -4   3  17   17.74   12.36
  -4   3  17    6.23   11.21
   4  -3 -16   -1.59   10.71
  -4  -3  16   31.24    9.47
   4   3 -16   24.81    8.92
  -4   3  16    7.17   10.46
  -4   3  16  -12.55   12.01
   4  -3 -15  200.93   16.24
  -4  -3  15  159.77   12.60
   4   3 -15  150.86   12.01
  -4   3  15  180.10   14.75
  -4   3  15  172.88   15.89
   4  -3 -14   92.42   13.35
  -4  -3  14   78.52    9.47
   4   3 -14   67.66    9.96
  -4   3  14   47.83   12.65
  -4   3  14   72.04   11.66
   4  -3 -13 1528.50   67.01
  -4  -3  13 1395.48   60.38
   4   3 -13 1400.96   60.78
  -4   3  13 1498.60   66.06
  -4   3  13 1538.46   67.66
   4   3 -12   65.66   10.61
  -4   3  12   35.77   10.61
   4  -3 -11 1892.19   82.25
  -4  -3  11 1992.83   84.84
   4   3 -11 2048.62   87.53
  -4   3  11 1942.01   84.00
   4  -3 -10  237.89   15.94
  -4  -3  10  266.49   15.00
   4   3 -10  266.34   15.94
  -4   3  10  253.09   16.64
   4  -3  -9 1921.58   82.60
  -4  -3   9 1912.12   81.36
   4   3  -9 2062.57   87.98
  -4   3   9 1847.85   79.81
   4  -3  -8   35.92    9.32
  -4  -3   8   42.00    7.47
   4   3  -8   23.52    7.52
  -4   3   8   46.38    9.96
   4  -3  -7  900.76   41.10
  -4  -3   7 1000.90   44.29
   4   3  -7  919.19   41.15
  -4   3   7  881.83   40.16
   4  -3  -6    8.32    7.77
  -4  -3   6   25.36    7.67
   4   3  -6   18.33    7.02
  -4   3   6    9.42    8.52
   4  -3  -5    5.58    7.27
  -4  -3   5    6.23    7.22
   4   3  -5   12.31    7.07
  -4   3   5    0.65    8.62
   4  -3  -4   76.77    9.96
  -4  -3   4   96.95    9.47
   4   3  -4   87.83    9.22
  -4   3   4   80.36    9.81
   4  -3  -3  555.50   26.16
  -4  -3   3  531.59   25.06
   4   3  -3  576.42   27.45
  -4   3   3  518.13   24.96
   4  -3  -2   31.79    7.07
  -4  -3   2   23.17    8.02
   4   3  -2   28.95    8.32
  -4   3   2   21.27    7.07
   4  -3  -1 4109.21  171.38
  -4  -3   1 4060.88  169.99
   4   3  -1 4228.77  177.11
  -4   3   1 4192.41  174.97
   4  -3   0   73.63    8.12
  -4  -3   0   69.60    9.07
   4   3   0   62.43    9.72
  -4   3   0   77.92    7.72
   4  -3   1 5838.98  242.83
  -4  -3  -1 5579.91  232.61
   4   3   1 5599.84  233.81
  -4   3  -1 5838.98  242.78
   4  -3   2  183.84   10.61
  -4  -3  -2  147.57   12.65
   4   3   2  169.19   12.41
  -4   3  -2  167.75   10.11
   4  -3   3 4961.64  206.46
  -4  -3  -3 4468.91  186.83
   4  -3   4   19.68    4.98
  -4  -3  -4   15.74    8.72
   4   3   4    7.77    8.57
  -4   3  -4   17.94    5.93
   4  -3   5 1805.50   75.98
  -4  -3  -5 1953.47   83.95
   4   3   5 1796.53   77.47
  -4   3  -5 1830.91   77.22
   4  -3   6  202.37   10.81
  -4  -3  -6  164.96   13.00
   4   3   6  177.81   13.20
  -4   3  -6  225.14   12.50
   4  -3   7  220.46   11.91
   4  -3   7  203.77   11.41
  -4  -3  -7  222.25   15.89
   4   3   7  215.62   14.85
  -4   3  -7  204.46   11.36
   4  -3   8   16.39    5.43
   4  -3   8   21.87    6.68
  -4  -3  -8   39.06   11.16
   4   3   8   36.87    9.96
   4   3   8   33.58   11.16
  -4   3  -8   12.36    6.43
   4  -3   9 1517.54   64.42
   4  -3   9 1464.23   62.77
  -4  -3  -9 1525.51   66.41
   4   3   9 1516.04   66.16
   4   3   9 1624.15   70.75
  -4   3  -9 1415.40   60.38
   4  -3  10   30.79    6.97
   4  -3  10   24.11    8.12
  -4  -3 -10   51.71   10.26
   4   3  10   29.49    9.27
   4   3  10   56.75   11.51
   4  -3  11 1375.05   59.29
   4  -3  11 1387.01   59.83
  -4  -3 -11 1519.53   66.56
   4   3  11 1458.75   64.27
   4   3  11 1417.40   62.28
   4  -3  12   47.48    9.22
   4  -3  12   49.42    8.87
  -4  -3 -12   48.03   13.20
   4   3  12   69.60   13.10
   4   3  12   41.85   12.95
   4  -3  13  912.71   40.16
   4  -3  13  885.81   39.36
  -4  -3 -13 1046.73   47.78
   4   3  13  949.58   44.59
   4   3  13 1016.34   46.28
   4  -3  14   68.80    9.72
   4  -3  14   73.63   10.56
   4   3  14   53.51   12.90
   4   3  14   55.25   11.86
   4  -3  15  212.83   14.20
   4  -3  15  215.82   14.15
   4   3  15  262.95   17.04
   4   3  15  301.02   19.63
   4  -3  16   23.81   10.81
   4  -3  16   13.95    9.96
   4   3  16   14.60   10.56
   4   3  16   16.04   10.46
   4  -3  17   18.93   11.31
   4  -3  17   15.49   11.61
   4   3  17   28.25   11.41
   4   3  17   19.13   11.46
   4  -3  18   23.91   12.55
   4  -3  18   64.42   13.15
   4   3  18   32.68   12.31
   4   3  18   38.56   11.36
   4  -3  19  116.13   15.79
   4  -3  19  109.75   14.95
   4   3  19  130.08   14.60
   4   3  19  116.38   12.55
   4  -3  20   29.94   15.49
   4  -3  20    2.04   17.49
   4   3  20   30.79   11.16
   4   3  20   10.81   10.46
   4  -3  21  155.94   18.78
   4  -3  21  201.57   19.68
   4   3  21  193.35   17.24
   4   3  21  199.48   16.29
  -4  -4  22  337.14   21.87
   4   4 -22  332.30   24.11
  -4   4  22  303.31   21.32
   4  -4 -21   -9.37   13.35
  -4  -4  21   -4.09   15.05
  -4  -4  21    2.19   12.46
   4   4 -21  -12.65   14.70
  -4   4  21   -5.78   12.80
  -4   4  21   15.79   12.46
   4  -4 -20  515.64   28.15
  -4  -4  20  589.38   28.95
  -4  -4  20  581.41   29.39
   4   4 -20  573.93   29.24
  -4   4  20  572.44   29.84
  -4   4  20  519.63   28.15
   4  -4 -19    2.59   12.55
  -4  -4  19    6.68    9.57
  -4  -4  19   -1.20   10.31
   4   4 -19  -17.79   11.86
  -4   4  19   -4.73   13.30
  -4   4  19   -4.83   13.65
   4  -4 -18  258.32   17.34
  -4  -4  18  221.20   14.60
  -4  -4  18  278.75   17.19
   4   4 -18  240.33   16.34
  -4   4  18  248.60   16.99
  -4   4  18  255.83   18.48
   4  -4 -17   32.58   10.86
  -4  -4  17   38.56    9.02
  -4  -4  17   25.76    9.47
   4   4 -17   46.38   10.86
  -4   4  17   23.42   12.90
  -4   4  17   13.35   10.66
   4  -4 -16   -5.53   12.55
  -4  -4  16    5.23    7.77
   4   4 -16   15.10    9.72
  -4   4  16   -4.48   11.91
  -4   4  16   -4.38   10.56
   4   4 -15  256.53   15.89
  -4   4  15  222.55   16.54
  -4   4  15  228.38   16.89
   4  -4 -14  629.23   30.89
  -4  -4  14  628.24   29.29
   4   4 -14  712.93   33.08
  -4   4  14  694.00   34.23
  -4   4  14  715.92   34.58
   4  -4 -13  452.47   24.41
  -4  -4  13  422.13   21.12
   4   4 -13  469.81   23.42
  -4   4  13  451.57   24.51
  -4   4  13  423.67   22.27
   4  -4 -12 2058.09   88.68
  -4  -4  12 1859.31   79.21
   4   4 -12 1945.99   83.25
  -4   4  12 1935.53   83.65
  -4   4  12 2009.27   86.69
   4  -4 -11   28.10   11.11
  -4  -4  11   34.68    8.17
   4   4 -11   47.93    9.52
  -4   4  11   30.74   11.51
  -4   4  11   11.81   10.11
   4  -4 -10 1684.44   73.59
  -4  -4  10 1741.73   74.63
   4   4 -10 1658.53   71.64
  -4   4  10 1668.49   72.84
   4  -4  -9   25.96   11.26
  -4  -4   9   35.97    8.27
   4   4  -9   30.54    8.52
  -4   4   9   22.02    9.91
   4  -4  -8 2488.04  105.92
  -4  -4   8 2562.27  108.36
   4   4  -8 2526.90  107.01
  -4   4   8 2566.76  109.31
   4  -4  -7   -9.52    8.57
  -4  -4   7    4.63    6.68
   4   4  -7    6.28    6.83
  -4   4   7    7.72    9.12
   4  -4  -6  798.13   36.42
  -4  -4   6  873.85   38.91
   4   4  -6  877.84   39.11
  -4   4   6  818.05   37.71
   4  -4  -5   73.98    9.67
  -4  -4   5   78.52    8.62
   4   4  -5   81.56    8.92
  -4   4   5   86.54   10.11
   4  -4  -4  101.83   10.21
  -4  -4   4   81.81    9.47
   4   4  -4   78.42    8.92
  -4   4   4   94.51   10.11
   4  -4  -3  625.75   29.54
  -4  -4   3  613.79   28.90
   4   4  -3  552.01   26.45
  -4   4   3  577.92   27.40
   4  -4  -2 1133.92   49.57
  -4  -4   2 1063.17   46.98
   4   4  -2 1062.67   47.03
  -4   4   2 1087.09   47.78
   4  -4  -1   81.76    8.72
  -4  -4   1  100.74   10.31
   4   4  -1  100.84   10.21
  -4   4   1   95.41    8.57
   4  -4   0 1736.25   73.68
  -4  -4   0 1695.40   73.24
   4   4   0 1678.96   72.34
  -4   4   0 1869.77   79.21
   4  -4   1   -7.27    6.23
  -4  -4  -1    2.04    9.32
   4   4   1    1.00    8.77
  -4   4  -1    5.68    5.83
   4  -4   2 3443.10  143.63
  -4  -4  -2 3159.62  133.27
   4   4   2 3279.69  138.30
  -4   4  -2 3629.43  151.55
   4  -4   3   27.55    5.03
  -4  -4  -3   30.04   10.26
   4   4   3   39.61   10.31
  -4   4  -3   38.91    5.68
   4  -4   4 4229.77  175.97
  -4  -4  -4 4240.73  178.06
   4   4   4 4265.14  178.91
  -4   4  -4 4293.04  178.66
   4  -4   5  768.23   32.88
  -4  -4  -5  790.16   37.07
   4   4   5  676.07   32.13
  -4   4  -5  734.85   31.64
   4  -4   6   41.80    4.58
   4  -4   6   39.36    5.13
  -4  -4  -6   40.50   11.06
   4   4   6   24.71   10.11
  -4   4  -6   37.86    5.03
   4  -4   7  299.87   14.10
   4  -4   7  283.63   13.35
  -4  -4  -7  280.14   18.23
   4   4   7  282.38   18.18
   4   4   7  270.13   16.69
  -4   4  -7  283.68   13.40
   4  -4   8  430.55   19.43
   4  -4   8  435.78   19.48
  -4  -4  -8  375.65   21.12
   4   4   8  421.93   22.42
   4   4   8  431.35   22.42
   4  -4   9   11.06    5.28
   4  -4   9   12.41    4.38
  -4  -4  -9    5.93    9.81
   4   4   9   17.84    9.91
   4   4   9   16.99    9.72
   4  -4  10  917.20   39.76
   4  -4  10  967.02   41.85
   4   4  10  995.42   45.69
   4   4  10 1001.89   46.33
   4  -4  11   -2.24    5.68
   4  -4  11    1.05    6.18
  -4  -4 -11   14.90   11.36
   4   4  11   -3.79   10.96
   4   4  11    3.89   12.16
   4  -4  12  711.44   31.39
   4  -4  12  710.94   31.49
   4   4  12  746.81   35.22
   4   4  12  791.15   37.86
   4  -4  13   30.69    7.77
   4  -4  13   26.85    8.47
  -4  -4 -13   30.94   13.20
   4   4  13   63.37   12.65
   4   4  13   23.47   11.76
   4  -4  14  431.45   21.17
   4  -4  14  415.80   20.18
   4   4  14  423.43   22.77
   4   4  14  425.22   23.47
   4  -4  15   24.16    9.27
   4  -4  15   22.52    8.37
   4   4  15   34.08   12.36
   4   4  15   35.92   13.25
   4  -4  16   59.59   10.71
   4  -4  16   45.98   10.56
   4   4  16   41.55   13.35
   4   4  16   51.46   11.76
   4  -4  17   16.89   11.36
   4  -4  17   13.65   11.36
   4   4  17   24.71   12.36
   4   4  17   30.19   13.15
   4  -4  18  118.82   14.85
   4  -4  18  111.35   14.30
   4   4  18  119.62   14.55
   4   4  18  139.55   14.95
   4  -4  19    0.45   14.95
   4  -4  19   -5.08   15.39
   4  -4  20  135.21   19.28
   4  -4  20  141.99   19.03
   4   4  20  192.76   15.54
   4   4  20  172.43   17.09
  -4  -5  21  512.65   28.65
  -4  -5  21  469.31   25.56
   4   5 -21  472.55   27.50
  -4   5  21  438.47   24.71
  -4   5  21  443.85   23.66
   4  -5 -20  -12.46   12.46
  -4  -5  20   32.58   15.05
  -4  -5  20   -8.82   13.05
   4   5 -20   -7.72   15.05
  -4   5  20    1.39   12.80
  -4   5  20   -0.30   13.85
   4  -5 -19  514.65   26.36
  -4  -5  19  503.69   26.95
  -4  -5  19  480.17   24.66
  -4   5  19  434.59   25.16
  -4   5  19  446.54   24.41
   4  -5 -18   10.21   12.85
  -4  -5  18   26.11    9.32
  -4  -5  18    6.88   10.21
   4   5 -18   25.86   11.01
  -4   5  18   -3.59   13.25
  -4   5  18  -12.95   12.85
   4  -5 -17   71.04   13.75
  -4  -5  17   62.33   10.86
  -4  -5  17   75.48    9.96
   4   5 -17   73.98   11.66
  -4   5  17   39.71   13.25
  -4   5  17   66.26   12.41
   4  -5 -16   59.29   11.21
  -4  -5  16   69.45    9.52
   4   5 -16   72.44   10.66
  -4   5  16   57.49   13.65
  -4   5  16   46.88   10.51
   4  -5 -15   36.72   11.96
  -4  -5  15   33.23    8.77
   4   5 -15   32.03    9.27
  -4   5  15   30.19   12.01
  -4   5  15   28.75   11.16
   4  -5 -14  165.01   14.80
  -4  -5  14  192.61   12.21
   4   5 -14  191.01   13.20
  -4   5  14  149.31   14.90
  -4   5  14  189.62   15.59
   4  -5 -13 1022.32   46.18
  -4  -5  13  950.08   42.10
   4   5 -13 1027.80   45.39
  -4   5  13 1031.79   46.88
   4  -5 -12   34.08   11.56
  -4  -5  12   41.75    7.42
   4   5 -12   39.81    8.12
  -4   5  12   41.80   11.61
  -4   5  12   46.73   11.81
   4  -5 -11  985.45   45.64
  -4  -5  11  963.53   42.50
   4   5 -11  936.13   41.55
  -4   5  11  878.34   40.70
  -4   5  11 1042.75   47.43
   4  -5 -10   37.56   11.21
  -4  -5  10   50.47    7.82
   4   5 -10   55.35    9.17
  -4   5  10   40.70    9.42
  -4   5  10   54.45   11.36
   4  -5  -9 2457.15  104.57
  -4  -5   9 2398.36  101.24
   4   5  -9 2462.14  104.37
  -4   5   9 2369.97  101.38
  -4   5   9 2241.43   95.95
   4  -5  -8  292.15   18.18
  -4  -5   8  321.04   16.99
   4   5  -8  288.41   16.19
  -4   5   8  267.99   16.69
  -4   5   8  268.78   16.19
   4  -5  -7  809.09   37.91
  -4  -5   7  842.97   38.01
   4   5  -7  809.59   36.57
  -4   5   7  752.29   34.92
   4  -5  -6  591.37   28.30
  -4  -5   6  642.69   29.94
   4   5  -6  625.75   29.05
  -4   5   6  622.76   29.94
   4  -5  -5   23.27    9.07
  -4  -5   5   17.09    7.97
   4  -5  -4  290.65   16.44
  -4  -5   4  323.73   17.29
   4   5  -4  292.10   16.54
  -4   5   4  297.43   16.89
   4  -5  -3  205.76   13.20
  -4  -5   3  184.98   12.80
   4   5  -3  192.56   13.20
  -4   5   3  187.52   12.70
   4  -5  -2  250.85   14.30
  -4  -5   2  254.43   15.64
   4   5  -2  238.84   14.85
  -4   5   2  231.47   13.80
   4  -5  -1  737.84   32.93
  -4  -5   1  770.23   35.47
   4   5  -1  700.48   32.43
  -4   5   1  754.78   33.78
   4  -5   0  346.95   16.89
  -4  -5   0  316.31   18.04
   4   5   0  334.35   18.38
  -4   5   0  322.14   16.34
   4  -5   1 1070.15   45.93
  -4  -5  -1  985.95   44.49
   4   5   1  947.09   42.70
  -4   5  -1 1080.61   46.58
   4  -5   2   88.43    7.42
  -4  -5  -2   89.43   11.66
   4   5   2   65.71    9.32
  -4   5  -2   73.63    6.63
   4  -5   3 1184.73   50.32
  -4  -5  -3 1152.85   51.86
   4   5   3 1144.38   50.62
  -4   5  -3 1152.35   48.92
   4  -5   4  242.28   11.36
  -4  -5  -4  199.53   15.10
   4   5   4  221.50   15.10
  -4   5  -4  231.82   11.01
  -4  -5  -5 1769.13   76.82
   4   5   5 1803.51   78.12
  -4  -5  -6   77.57   11.36
   4   5   6  117.73   12.65
  -4  -5  -7   35.32   10.66
   4   5   7   53.61   10.51
   4   5   7   26.90    9.86
  -4  -5  -8   53.56   10.66
   4   5   8   67.31   12.75
   4   5   8   51.02   10.31
  -4  -5  -9  519.63   27.30
   4   5   9  557.49   28.65
   4   5   9  508.17   27.50
  -4  -5 -10  205.26   16.59
   4   5  10  160.32   15.49
   4   5  10  185.83   15.05
  -4  -5 -11  724.39   34.92
   4   5  11  664.61   32.28
   4   5  11  746.81   36.27
  -4  -5 -12   15.79   12.80
   4   5  12   -6.33   12.21
   4   5  12   25.51   12.60
   4  -5  13 1119.97   47.63
   4  -5  13 1140.39   48.62
  -4  -5 -13  973.00   45.19
   4   5  13 1086.09   49.47
   4   5  13 1220.61   54.70
   4  -5  14   15.69    5.58
   4  -5  14   14.70    5.58
   4   5  14   31.49   12.60
   4   5  14   13.30   12.70
   4  -5  15  149.71    9.81
   4  -5  15  147.37    9.62
   4   5  15  173.08   15.39
   4   5  15  167.45   15.44
   4  -5  16   14.35    7.67
   4  -5  16   17.44    8.42
   4   5  16   15.59   10.96
   4   5  16   30.14   11.56
   4  -5  17    5.58    9.02
   4  -5  17    1.39    9.62
   4   5  17   -1.84   12.60
   4   5  17    4.09   12.21
   4  -5  18    3.54   10.21
   4  -5  18    4.53   11.66
   4   5  18   11.56   11.86
   4   5  18   14.25   12.70
   4  -5  19   52.56   14.45
   4  -5  19   56.40   13.65
   4   5  19   78.47   12.41
   4   5  19   61.88   13.45
   4  -5  20  -16.19   15.49
   4  -5  20    8.32   16.39
   4   5  20   -7.52   14.10
   4   5  20   28.75   14.75
  -4  -6  20  333.65   25.76
  -4  -6  20  336.54   20.83
   4   6 -20  392.99   25.76
  -4   6  20  376.05   21.97
  -4   6  20  411.07   24.06
  -4  -6  19   18.48   15.39
  -4  -6  19   -7.07   11.46
   4   6 -19   22.87   15.74
  -4   6  19   -0.75   12.70
  -4   6  19  -25.11   13.10
   4  -6 -18  203.27   16.94
  -4  -6  18  168.19   13.80
  -4  -6  18  192.51   16.24
   4   6 -18  204.12   17.64
  -4   6  18  184.78   15.79
  -4   6  18  153.40   15.99
   4  -6 -17   10.91   12.70
  -4  -6  17   10.76   11.26
  -4  -6  17   20.63    9.86
   4   6 -17    6.83   12.55
  -4   6  17  -16.69   11.51
  -4   6  17    3.24   12.11
   4  -6 -16   21.82   12.11
  -4  -6  16    6.43    8.57
  -4  -6  16   15.15    9.62
   4   6 -16   10.66    9.62
  -4   6  16   18.28   12.60
  -4   6  16   18.78    9.67
   4  -6 -15  249.20   17.29
  -4  -6  15  233.86   13.70
   4   6 -15  254.78   15.44
  -4   6  15  225.94   16.04
  -4   6  15  274.96   18.63
   4  -6 -14   25.16   10.21
  -4  -6  14   15.89    7.37
   4   6 -14   11.51    8.07
  -4   6  14   21.82   11.86
  -4   6  14   19.63   10.36
   4  -6 -13   60.88   12.41
  -4  -6  13   84.89    8.97
   4   6 -13   56.60    8.62
  -4   6  13   69.45   13.05
  -4   6  13   94.36   13.75
   4  -6 -12  755.28   35.97
  -4  -6  12  869.37   38.56
   4   6 -12  829.51   37.27
  -4   6  12  804.10   37.96
  -4   6  12  845.46   39.86
   4  -6 -11   28.30   10.06
  -4  -6  11   33.68    7.12
   4   6 -11   42.65    8.62
  -4   6  11   49.02   12.11
  -4   6  11   50.17   11.71
   4  -6 -10 1189.22   53.01
  -4  -6  10 1060.68   46.18
   4   6 -10 1159.82   50.92
  -4   6  10 1111.50   50.17
  -4   6  10 1000.40   45.34
   4  -6  -9   34.33   10.16
  -4  -6   9   31.98    7.92
   4   6  -9   36.72    8.22
  -4   6   9   31.94    9.67
  -4   6   9   15.79    9.22
   4  -6  -8  874.85   40.21
  -4  -6   8  887.80   39.61
   4   6  -8  926.17   41.50
  -4   6   8  841.47   38.81
  -4   6   8  817.06   37.86
   4  -6  -7   77.72    9.67
  -4  -6   7  100.94    9.47
   4   6  -7   72.49    9.22
  -4   6   7   69.35    9.27
  -4   6   7   91.67   11.56
   4  -6  -6  200.93   13.95
  -4  -6   6  213.18   13.55
   4   6  -6  191.61   12.60
  -4   6   6  169.99   12.85
  -4   6   6  192.91   13.30
   4  -6  -5  229.82   14.35
  -4  -6   5  273.42   15.89
   4   6  -5  214.53   13.65
  -4   6   5  216.67   14.20
  -4   6   5  241.58   15.15
   4  -6  -4  185.43   13.15
  -4  -6   4  183.94   12.75
   4   6  -4  195.20   13.00
  -4   6   4  229.87   14.45
   4  -6  -3 1306.30   57.04
  -4  -6   3 1288.36   56.00
   4   6  -3 1210.14   53.36
  -4   6   3 1229.57   53.96
  -4   6   3 1216.62   53.06
   4  -6  -2 1060.18   46.68
  -4  -6   2  962.04   43.14
   4   6  -2  999.90   44.79
  -4   6   2 1014.85   44.89
  -4   6   2  978.98   43.19
   4  -6  -1   94.01    9.07
  -4  -6   1  100.49   11.41
   4   6  -1   83.95   10.21
  -4   6   1  100.69    9.27
  -4   6   1   95.90    9.57
   4  -6   0 1565.86   66.86
  -4  -6   0 1568.35   67.81
   4   6   0 1651.06   71.44
  -4   6   0 1622.66   69.25
  -4   6   0 1567.86   66.81
   4  -6   1   75.08    7.42
  -4  -6  -1   76.87   11.41
   4   6   1   86.54   10.61
  -4   6  -1   77.42    7.57
  -4   6  -1   91.37    8.27
   4  -6   2 1210.64   51.46
  -4  -6  -2 1104.03   50.07
   4   6   2 1039.76   46.53
  -4   6  -2 1191.71   50.77
  -4   6  -2 1228.08   52.31
   4  -6   3   11.61    4.78
  -4  -6  -3    8.17   10.36
   4   6   3    5.48    8.47
  -4   6  -3   12.21    4.73
  -4   6  -3    9.07    4.18
  -4  -6  -4  412.96   22.92
   4   6   4  388.35   21.02
  -4  -6  -5  187.08   15.54
   4   6   5  195.35   15.74
   4   6   5  213.68   15.25
  -4  -6  -6   59.98   10.96
   4   6   6   42.25   10.96
   4   6   6   58.19   10.61
  -4  -6  -7  235.50   17.09
   4   6   7  283.33   18.33
   4   6   7  262.55   17.84
  -4  -6  -8  305.75   20.23
   4   6   8  283.98   19.63
   4   6   8  313.42   19.53
  -4  -6  -9    4.33   12.80
   4   6   9    9.76   10.81
   4   6   9   15.39   12.31
  -4  -6 -10 1716.82   75.28
   4   6  10 1575.83   68.90
   4   6  10 1598.25   70.55
  -4  -6 -11   34.97   13.55
   4   6  11   54.11   12.55
   4   6  11   65.71   13.45
  -4  -6 -12 1127.94   51.22
   4   6  12 1020.82   46.68
   4   6  12 1063.67   48.18
   4   6  13   35.62   12.06
   4   6  13   35.77   11.96
   4   6  14  460.29   24.06
   4   6  14  482.81   26.31
   4   6  15   31.79   12.01
   4   6  15   25.01   12.80
   4   6  16  133.92   14.50
   4   6  16  156.14   15.69
   4   6  17   10.41   11.91
   4   6  17    7.17   13.65
   4   6  18   10.86   13.90
   4   6  18   20.08   12.16
   4   6  19    4.53   11.86
   4   6  19    1.05   12.60
  -4  -7  19  215.13   21.97
  -4  -7  19  234.75   20.23
  -4   7  19  233.46   18.23
  -4   7  19  247.76   19.13
  -4  -7  18   64.87   17.29
  -4  -7  18   33.43   13.80
   4   7 -18   31.59   16.24
  -4   7  18   46.38   14.10
  -4   7  18   44.69   13.85
  -4  -7  17   70.65   14.85
  -4  -7  17   78.52   12.65
   4   7 -17   59.39   15.79
  -4   7  17   53.91   12.70
  -4   7  17   69.70   13.05
   4  -7 -16   36.12   12.50
  -4  -7  16   34.77   13.80
  -4  -7  16   65.76   11.26
   4   7 -16   63.62   14.55
  -4   7  16   37.32   12.55
  -4   7  16   38.11   12.41
   4  -7 -15   -8.27   12.16
  -4  -7  15   -0.25    9.37
   4   7 -15   12.31   11.66
  -4   7  15    2.64   12.65
  -4   7  15   13.85   10.96
   4  -7 -14  174.97   16.54
  -4  -7  14  203.07   13.65
   4   7 -14  156.44   13.65
  -4   7  14  148.12   14.40
  -4   7  14  154.49   15.25
   4  -7 -13  275.51   17.89
  -4  -7  13  279.34   15.94
   4   7 -13  305.05   17.54
  -4   7  13  258.87   17.44
  -4   7  13  244.32   16.79
   4  -7 -12   37.27   11.61
  -4  -7  12   62.52    8.87
   4   7 -12   44.44   10.41
  -4   7  12   39.71   12.21
  -4   7  12   53.16   12.31
   4  -7 -11  334.10   20.53
  -4  -7  11  363.09   18.58
   4   7 -11  361.85   18.53
  -4   7  11  339.78   20.63
  -4   7  11  391.74   22.27
   4  -7 -10   -1.59   10.31
  -4  -7  10   -9.67    8.27
   4   7 -10    3.74    7.97
  -4   7  10    8.77   11.51
  -4   7  10   20.87   10.76
   4  -7  -9 1366.58   60.23
  -4  -7   9 1388.50   59.93
   4   7  -9 1337.68   58.14
  -4   7   9 1321.24   58.54
  -4   7   9 1322.74   58.74
   4  -7  -8   34.72    9.76
  -4  -7   8   34.97    8.32
   4   7  -8   19.53    8.42
  -4   7   8   23.27   11.56
  -4   7   8   14.80   11.11
   4  -7  -7  459.50   24.26
  -4  -7   7  470.80   23.37
   4   7  -7  440.36   22.37
  -4   7   7  421.83   22.67
  -4   7   7  462.83   24.51
   4   7  -6  101.98   11.31
  -4   7   6   75.18   11.61
  -4   7   6   95.26   11.26
   4  -7  -5   19.83    9.47
  -4  -7   5   18.04    8.82
   4   7  -5   16.19    8.17
  -4   7   5    8.97    8.77
  -4   7   5   25.61   10.46
   4  -7  -4  156.24   12.01
  -4  -7   4  196.59   14.15
   4   7  -4  168.99   13.05
  -4   7   4  154.29   12.16
  -4   7   4  155.64   11.96
   4  -7  -3  378.34   19.73
  -4  -7   3  458.55   23.42
   4   7  -3  358.91   19.23
  -4   7   3  410.32   21.12
  -4   7   3  380.13   19.73
   4  -7  -2  303.31   16.39
  -4  -7   2  307.94   17.99
   4   7  -2  322.14   18.28
  -4   7   2  287.86   16.49
  -4   7   2  276.31   15.39
   4  -7  -1  999.40   43.49
  -4  -7   1  995.42   45.19
   4   7  -1  954.56   43.05
  -4   7   1  980.47   43.34
  -4   7   1  984.95   43.64
   4  -7   0    8.52    6.23
  -4  -7   0   13.40    9.72
   4   7   0   15.15    8.82
  -4   7   0    5.13    7.12
  -4   7   0   -0.65    6.43
   4  -7   1  910.72   39.56
  -4  -7  -1  872.86   40.26
   4   7   1  936.13   42.55
  -4   7  -1  860.40   37.71
  -4   7  -1  882.82   38.61
  -4  -7  -2    2.19   10.21
   4   7   2   12.55    9.12
  -4   7  -2    8.72    5.43
  -4   7  -2    2.29    6.23
  -4  -7  -3  501.69   25.86
   4   7   3  498.21   25.66
  -4   7  -3  496.51   22.02
  -4   7  -3  539.06   23.86
  -4  -7  -4   46.58   11.96
   4   7   4   44.09   10.71
   4   7   4   73.54   11.56
  -4  -7  -5   53.66   12.16
   4   7   5   39.56   10.61
   4   7   5   35.42   11.46
  -4  -7  -6   41.40   12.46
   4   7   6   15.34   12.41
   4   7   6   54.75   11.81
  -4  -7  -7  524.61   28.00
   4   7   7  530.59   28.10
   4   7   7  515.64   27.30
  -4  -7  -8   32.83   13.35
   4   7   8   45.19   12.80
   4   7   8   22.67   12.16
  -4  -7  -9  715.92   35.12
   4   7   9  623.75   31.59
   4   7   9  664.11   33.13
  -4  -7 -10   47.13   13.10
   4   7  10   27.60   12.85
   4   7  10   59.98   12.55
  -4  -7 -11  783.18   37.61
   4   7  11  747.31   35.72
   4   7  11  695.00   34.18
  -4  -7 -12   24.21   12.50
   4   7  12   19.68   10.51
   4   7  12   45.04   13.50
   4   7  13  593.36   29.49
   4   7  13  641.19   31.89
   4   7  14   44.84   12.36
   4   7  14   28.50   12.70
   4   7  15  147.02   14.85
   4   7  15  145.48   15.29
   4   7  16   10.96   12.11
   4   7  16   22.12   14.25
   4   7  17  -11.21   13.55
   4   7  17   -1.84   13.40
   4   7  18   12.16   12.60
   4   7  18   10.41   14.80
  -4   8  18  119.47   16.29
  -4   8  18  140.25   15.00
  -4  -8  17   30.99   12.41
  -4  -8  17   33.03   14.35
  -4   8  17   15.54   11.71
  -4   8  17   24.01   12.60
  -4  -8  16   14.15   13.35
  -4  -8  16   50.57   12.90
   4   8 -16   59.04   15.25
  -4   8  16   57.09   13.05
  -4   8  16   49.62   14.15
  -4  -8  15  148.17   15.34
  -4  -8  15  188.72   14.10
   4   8 -15  138.40   14.25
  -4   8  15   96.00   15.20
  -4   8  15  146.47   14.25
  -4  -8  14   40.16   10.61
   4   8 -14   35.82   11.36
  -4   8  14   27.85   12.01
  -4   8  14    8.27   10.26
   4  -8 -13   55.65   12.85
  -4  -8  13   81.76   10.81
   4   8 -13   76.72   11.71
  -4   8  13   45.29   10.86
  -4   8  13   64.42   12.95
   4  -8 -12  596.85   30.24
  -4  -8  12  537.56   25.81
   4   8 -12  592.87   28.25
  -4   8  12  501.69   26.16
  -4   8  12  540.06   27.90
   4  -8 -11    7.37   11.66
  -4  -8  11   -2.69    9.86
   4   8 -11   -2.94    9.81
  -4   8  11   -0.40   11.41
  -4   8  11    0.70   11.46
   4  -8 -10 1078.62   49.07
  -4  -8  10 1101.04   48.18
   4   8 -10 1064.67   47.23
  -4   8  10 1013.35   46.43
  -4   8  10 1039.76   47.28
   4  -8  -9  -11.86   11.81
  -4  -8   9    5.88    9.37
   4   8  -9  -13.75    9.42
  -4   8   9   -0.40   11.41
  -4   8   9    7.37   11.11
   4  -8  -8  417.60   23.42
  -4  -8   8  422.28   22.17
   4   8  -8  401.16   20.73
  -4   8   8  384.86   22.22
  -4   8   8  356.22   20.48
   4  -8  -7   10.51   10.81
  -4  -8   7   27.10   10.36
   4   8  -7   22.22    9.47
  -4   8   7   28.15   10.86
  -4   8   7   18.43   11.26
   4  -8  -6  138.50   13.15
  -4  -8   6  171.68   12.70
   4   8  -6  146.52   12.55
  -4   8   6  159.23   13.25
  -4   8   6  169.94   14.35
   4  -8  -5  142.89   13.20
  -4  -8   5  173.18   14.10
   4   8  -5  101.34   11.61
  -4   8   5  125.90   12.21
  -4   8   5  115.24   13.45
   4  -8  -4   47.03   10.81
  -4  -8   4   22.77   10.06
   4   8  -4   30.79   10.71
  -4   8   4   41.75   11.86
  -4   8   4   20.08    9.62
   4  -8  -3  148.12   13.60
  -4  -8   3  151.95   14.10
   4   8  -3  113.49   12.46
  -4   8   3  147.42   13.15
  -4   8   3  152.40   14.25
   4  -8  -2  861.40   39.36
  -4  -8   2  923.18   42.55
   4   8  -2  907.73   41.95
  -4   8   2  900.26   40.75
  -4   8   2  854.42   38.51
  -4  -8   1  124.80   13.65
   4   8  -1   78.72   12.65
  -4   8   1   84.60   10.56
  -4   8   1   99.44   11.41
  -4  -8   0  935.13   43.54
   4   8   0  926.17   42.95
  -4   8   0  918.19   40.85
  -4   8   0  922.68   41.15
  -4  -8  -1  227.78   16.54
   4   8   1  252.14   17.49
  -4   8  -1  227.58   13.55
  -4   8  -1  207.90   13.20
  -4  -8  -2  701.97   34.43
   4   8   2  625.25   30.89
   4   8   2  605.82   29.74
  -4   8  -2  722.90   32.03
  -4   8  -2  628.24   28.45
  -4  -8  -3   69.70   13.95
   4   8   3   44.49   11.76
   4   8   3   29.34   11.71
  -4   8  -3   57.54    6.13
  -4   8  -3   49.67    5.93
  -4  -8  -4  159.13   15.49
   4   8   4  147.02   14.45
   4   8   4  158.23   14.25
  -4  -8  -5   -1.94   13.50
   4   8   5   19.38   12.31
   4   8   5   26.70   12.65
  -4  -8  -6   30.74   13.30
   4   8   6   43.34   12.16
   4   8   6   59.44   13.45
  -4  -8  -7   83.65   15.00
   4   8   7   91.22   14.10
   4   8   7   99.34   14.00
  -4  -8  -8  433.79   25.16
   4   8   8  379.33   22.27
   4   8   8  358.46   21.92
  -4  -8  -9   84.35   15.20
   4   8   9   81.86   14.50
   4   8   9   73.39   14.15
  -4  -8 -10  433.74   24.81
   4   8  10  380.28   22.22
   4   8  10  425.27   23.66
  -4  -8 -11    0.80   11.91
   4   8  11    7.47   11.66
   4   8  11  -21.87   10.81
   4   8  12  565.96   28.40
   4   8  12  564.97   28.70
   4   8  13   58.44   12.65
   4   8  13   32.43   12.21
   4   8  14  237.89   17.54
   4   8  14  221.85   17.24
   4   8  15   70.20   13.10
   4   8  15   49.12   14.30
   4   8  16    5.03   13.95
   4   8  16   40.26   13.55
   4   8  17   18.23   14.40
   4   8  17   31.44   14.25
  -4   9  17    3.99   14.30
  -4   9  17   11.86   12.75
  -4   9  16   30.54   13.40
  -4   9  16    1.74   13.95
  -4   9  15    1.15   14.00
  -4   9  15   19.43   13.40
   4   9 -14   36.37    6.33
  -4   9  14   19.78   13.95
  -4   9  14   52.06   14.20
  -4  -9  13  133.67   10.51
   4   9 -13  140.49   11.21
  -4   9  13  128.74   15.89
  -4   9  13  162.32   16.64
  -4  -9  12   19.13    9.62
   4   9 -12    8.97   10.56
  -4   9  12   33.03   13.55
  -4   9  12   25.01   12.41
  -4  -9  11  650.66   29.89
   4   9 -11  672.58   31.29
  -4   9  11  688.52   33.68
  -4   9  11  700.98   34.18
  -4  -9  10    1.20   10.06
   4   9 -10    0.75   11.11
  -4   9  10   -9.32   11.46
  -4   9  10   -4.68   12.65
  -4  -9   9  650.16   30.54
   4   9  -9  678.56   31.94
  -4   9   9  606.32   29.49
  -4   9   9  649.66   31.98
  -4  -9   8   10.16   10.81
   4   9  -8    9.42   10.41
  -4   9   8   -4.09   11.36
  -4   9   8   -6.23   11.41
  -4  -9   7  126.10   13.40
   4   9  -7  114.74   11.91
  -4   9   7  117.68   13.40
  -4   9   7  119.77   14.05
  -4  -9   6   43.24   11.51
   4   9  -6   13.45    9.96
  -4   9   6   18.38   11.01
  -4   9   6    5.98   11.31
  -4  -9   5   32.33   11.91
   4   9  -5   -0.90   10.86
  -4   9   5   29.64   10.36
  -4   9   5   21.17   11.91
  -4  -9   4   68.65   11.66
   4   9  -4   83.00   12.90
  -4   9   4  109.95   14.15
  -4   9   4   97.40   12.21
  -4  -9   3  210.64   16.14
   4   9  -3  170.88   14.90
  -4   9   3  184.49   15.39
  -4   9   3  171.43   14.10
  -4  -9   2  117.88   14.05
   4   9  -2  103.38   13.40
  -4   9   2   61.18   11.56
  -4   9   2   85.74   11.31
  -4  -9   1  355.32   21.87
   4   9  -1  364.49   21.72
  -4   9   1  353.83   20.03
  -4   9   1  321.04   18.08
  -4  -9   0    5.28   11.91
   4   9   0   19.03   12.26
   4   9   0   59.49   12.26
  -4   9   0   26.95    9.27
  -4   9   0   27.55   10.06
  -4  -9  -1  943.10   43.89
   4   9   1  956.56   44.49
   4   9   1  916.70   42.25
  -4   9  -1  870.86   38.76
  -4   9  -1  914.71   40.40
  -4  -9  -2   63.77   13.85
   4   9   2   18.33   13.15
   4   9   2   35.27   12.80
  -4   9  -2   45.98    8.42
  -4   9  -2   43.79    8.27
  -4  -9  -3  588.38   30.79
   4   9   3  600.34   30.69
   4   9   3  577.42   29.54
  -4  -9  -4   72.14   14.55
   4   9   4  105.72   14.45
   4   9   4   76.67   12.31
  -4  -9  -5   30.49   13.40
   4   9   5   34.92   11.31
   4   9   5   25.36   12.60
  -4  -9  -6  141.19   16.14
   4   9   6  137.31   14.85
   4   9   6  123.41   15.44
  -4  -9  -7   29.69   15.05
   4   9   7   19.33   13.50
   4   9   7   14.15   13.15
  -4  -9  -8   23.47   11.51
   4   9   8   42.70   12.55
   4   9   8   37.86   12.01
  -4  -9  -9  177.91   16.69
   4   9   9  167.80   15.94
   4   9   9  168.89   16.39
  -4  -9 -10   11.56   11.96
   4   9  10   -6.43   12.95
   4   9  10    1.00   13.15
   4   9  11  255.13   18.68
   4   9  11  242.68   17.74
   4   9  12    6.97   13.25
   4   9  12   -4.58   12.16
   4   9  13  404.39   23.57
   4   9  13  419.54   25.26
   4   9  14   39.51   14.65
   4   9  14   74.08   14.05
   4   9  15  177.26   17.34
   4   9  15  167.30   17.29
  -4  10  15   50.77   14.15
  -4  10  15   50.92   15.59
  -4  10  14   75.53   14.85
  -4  10  14   88.83   16.29
  -4  10  13   14.95   14.05
  -4  10  13    8.52   14.85
  -4  10  12  364.14   22.27
  -4  10  12  323.88   20.83
  -4 -10  11    2.69    7.12
  -4  10  11  -13.20   12.70
  -4  10  11  -30.09   13.25
  -4 -10  10  328.27   18.93
   4  10 -10  326.52   18.33
   4  10 -10  359.16   20.43
  -4  10  10  370.47   22.62
  -4  10  10  375.35   22.67
  -4 -10   9   75.23   13.25
   4  10  -9   56.85   14.65
   4  10  -9   80.96   11.76
  -4  10   9   84.70   13.20
  -4  10   9   67.81   13.50
  -4 -10   8  155.89   15.44
   4  10  -8  190.66   14.55
   4  10  -8  215.37   17.59
  -4  10   8  205.26   16.04
  -4  10   8  203.27   16.39
  -4 -10   7    3.09   12.31
   4  10  -7   -2.29   10.31
   4  10  -7   -7.72   12.50
  -4  10   7   13.65   11.81
  -4  10   7   -0.60   12.06
  -4 -10   6   76.72   13.75
   4  10  -6  103.18   13.40
   4  10  -6   83.60   12.70
  -4  10   6   95.95   13.75
  -4  10   6  108.51   13.40
  -4 -10   5  181.40   16.54
   4  10  -5  127.34   14.60
   4  10  -5  113.29   13.60
  -4  10   5  145.33   14.05
  -4  10   5  128.14   15.39
  -4 -10   4   -3.19   13.55
   4  10  -4   19.13   11.91
   4  10  -4    8.62   11.56
  -4  10   4    4.14   12.01
  -4  10   4    9.91   11.81
  -4 -10   3  120.27   15.25
   4  10  -3   78.07   13.05
   4  10  -3   47.98   12.46
  -4  10   3   43.44   12.01
  -4  10   3   50.02   12.26
  -4 -10   2  172.58   15.79
   4  10  -2  183.14   15.79
   4  10  -2  211.49   16.94
  -4  10   2  192.76   15.34
  -4  10   2  161.12   13.95
  -4 -10   1   53.36   13.70
   4  10  -1   55.65   12.50
   4  10  -1   31.69   13.25
  -4  10   1   41.95   11.56
  -4  10   1   51.22   10.41
  -4 -10   0  561.98   29.10
   4  10   0  511.16   27.15
   4  10   0  535.57   27.75
  -4  10   0  545.54   26.95
  -4  10   0  552.51   26.80
  -4 -10  -1   40.45   14.40
   4  10   1   24.46   12.21
   4  10   1   17.29   11.76
  -4  10  -1   16.59   10.41
  -4  10  -1   18.48    9.67
  -4 -10  -2  547.53   29.19
   4  10   2  647.17   32.33
   4  10   2  565.96   29.05
  -4  10  -2  678.56   30.74
  -4 -10  -3   13.20   13.25
   4  10   3   10.66   13.45
   4  10   3    4.18   12.65
  -4 -10  -4  193.95   17.19
   4  10   4  225.44   18.08
   4  10   4  204.96   16.84
  -4 -10  -5  168.00   16.94
   4  10   5  192.66   16.74
   4  10   5  209.70   17.89
  -4 -10  -6   25.51   13.10
   4  10   6   21.62   13.20
   4  10   6   35.37   13.70
  -4 -10  -7   60.18   15.34
   4  10   7   56.30   13.90
   4  10   7   40.40   12.65
  -4 -10  -8   89.23   15.10
   4  10   8   76.47   12.90
   4  10   8  121.96   15.10
   4  10   9   10.36   13.50
   4  10   9    2.89   13.85
   4  10  10  126.39   16.19
   4  10  10  105.67   14.45
   4  10  11  -22.62   14.50
   4  10  11  -21.92   14.10
   4  10  12  208.65   17.94
   4  10  12  230.32   19.08
   4  10  13  -39.51   14.55
   4  10  13   -5.53   12.85
   4  10  14  163.31   17.49
   4  10  14  129.53   17.79
  -4  11  13   79.46   16.39
  -4  11  13   69.70   14.95
  -4  11  12   22.32   16.29
  -4  11  12    5.43   14.40
  -4  11  11  176.96   16.89
  -4  11  11  206.95   18.83
  -4  11  10   16.24   15.05
  -4  11  10    8.07   13.50
   4  11  -9  163.81   14.15
   4  11  -9  140.20   13.15
  -4  11   9  158.53   16.14
  -4  11   9  188.57   18.04
  -4 -11   8   31.24   14.75
   4  11  -8   36.97   15.34
   4  11  -8   25.66   12.75
  -4  11   8   36.92   12.85
  -4  11   8   23.91   15.25
  -4 -11   7   87.49   15.54
   4  11  -7  108.91   15.10
   4  11  -7  116.53   17.49
  -4  11   7  113.44   14.45
  -4  11   7  153.65   16.59
  -4 -11   6    8.12   16.19
   4  11  -6    1.30   12.95
   4  11  -6   -4.83   17.19
  -4  11   6   19.53   11.76
  -4  11   6    2.99   13.55
  -4 -11   5  -11.21   16.59
   4  11  -5   -0.80   14.45
   4  11  -5  -18.18   13.60
  -4  11   5   13.80   11.61
  -4  11   5   -3.14   13.70
  -4 -11   4   53.01   15.54
   4  11  -4   60.98   15.64
   4  11  -4   70.89   14.75
  -4  11   4   66.71   14.30
  -4  11   4   78.87   14.05
  -4 -11   3    3.69   14.85
   4  11  -3    8.12   13.75
   4  11  -3   58.14   14.10
  -4  11   3   28.10   11.91
  -4  11   3   50.52   12.95
  -4 -11   2   46.38   14.35
   4  11  -2   50.77   14.90
   4  11  -2   62.72   14.65
  -4  11   2   53.16   12.11
  -4  11   2   61.13   14.35
  -4 -11   1  139.40   15.74
   4  11  -1  153.90   17.14
   4  11  -1  227.88   18.98
  -4  11   1  158.48   15.44
  -4  11   1  166.80   15.34
  -4 -11   0  -31.44   14.60
   4  11   0   10.31   13.35
   4  11   0    3.54   13.80
  -4  11   0    0.10   11.96
  -4  11   0    3.34   11.81
  -4 -11  -1  384.07   23.76
   4  11   1  381.43   23.02
   4  11   1  408.68   23.96
  -4  11  -1  437.03   22.87
  -4  11  -1  390.74   21.32
  -4 -11  -2   13.05   15.10
   4  11   2   41.75   12.90
   4  11   2   25.91   14.15
  -4  11  -2   41.45    8.37
  -4  11  -2   34.92    9.67
  -4 -11  -3  300.62   21.97
   4  11   3  338.28   22.07
   4  11   3  359.85   22.57
  -4 -11  -4    3.14   14.60
   4  11   4   25.26   13.70
   4  11   4   23.47   12.95
  -4 -11  -5   43.05   14.30
   4  11   5   72.59   15.34
   4  11   5   53.16   13.80
  -4 -11  -6    9.86   14.85
   4  11   6    7.52   14.05
   4  11   6   16.09   15.10
   4  11   7  -19.43   14.60
   4  11   7    2.19   13.60
   4  11   8   59.24   15.15
   4  11   8   87.04   16.24
   4  11   9  139.40   17.04
   4  11   9  121.56   16.99
   4  11  10   16.04   15.10
   4  11  10    5.58   15.69
   4  11  12    8.57   15.29
   4  11  12   16.89   15.69
  -4  12  10  125.15   17.99
  -4  12  10  163.86   16.69
  -4  12   9   44.74   16.04
  -4  12   9   32.58   16.54
   4  12  -8   15.94    9.32
   4  12  -8    2.64    8.82
  -4  12   8   32.03   16.54
   4  12  -7   25.21   18.58
   4  12  -7   33.98   14.50
  -4  12   7   46.78   17.04
  -4  12   7   48.53   14.80
   4  12  -6   12.16   18.58
   4  12  -6   11.21   16.04
  -4  12   6   -1.10   15.69
  -4  12   6   12.55   15.05
   4  12  -5   90.72   21.02
   4  12  -5   74.13   16.94
  -4  12   5   96.30   16.14
  -4  12   5   89.98   15.89
  -4 -12   4    0.20   17.24
   4  12  -4   -9.02   18.58
   4  12  -4    9.07   16.74
  -4  12   4    7.62   14.95
  -4  12   4    5.48   15.99
  -4 -12   3   17.84   17.74
   4  12  -3   39.46   17.64
   4  12  -3   45.59   17.34
  -4  12   3   45.79   16.94
  -4  12   3   27.80   14.40
  -4 -12   2  100.24   19.33
   4  12  -2  103.28   18.68
   4  12  -2  110.30   18.88
  -4  12   2  121.16   17.84
  -4  12   2   71.54   14.95
  -4 -12   1   19.28   15.89
   4  12  -1   -5.03   16.44
   4  12  -1   -9.37   16.09
  -4  12   1    9.47   18.63
  -4  12   1   34.28   13.70
  -4 -12   0  196.04   18.58
   4  12   0  225.34   19.98
   4  12   0  198.93   18.43
  -4  12   0  164.91   16.94
  -4  12   0  193.15   16.44
  -4 -12  -1    1.69   15.05
   4  12   1    1.99   15.69
   4  12   1   -3.64   15.64
  -4  12  -1   13.95   14.00
  -4  12  -1    7.67   13.95
   4  12   2  134.62   17.24
   4  12   2  104.17   17.29
   4  12   3   16.04   15.89
   4  12   3    5.28   15.34
   4  12   4   65.51   15.69
   4  12   4   69.55   16.64
   4  12   5   13.60   14.70
   4  12   5   10.66   15.54
   4  12   6   34.97   16.64
   4  12   6   -8.22   15.05
   4  12   7    9.27   17.19
   4  12   7   34.72   15.25
   4  12   8   18.78   16.14
   4  12   8   15.44   15.34
   4  12   9   17.04   16.54
   4  12   9   29.39   15.94
   4  13  -6   -3.49   15.39
   4  13  -6    2.59   17.59
  -4  13   6   32.68   19.18
  -4  13   6   22.27   18.78
   4  13  -5   24.46   20.83
   4  13  -5   -8.72   17.84
  -4  13   5    2.44   18.73
  -4  13   5  -28.75   17.19
   4  13  -4   51.51   20.53
   4  13  -4   24.26   21.87
  -4  13   4   61.98   18.88
  -4  13   4   18.58   17.79
   4  13  -3   34.08   21.77
   4  13  -3   86.29   23.42
  -4  13   3   64.17   18.98
  -4  13   3   46.98   19.13
   4  13  -2    3.19   20.78
   4  13  -2   41.90   20.68
  -4  13   2   47.98   18.78
  -4  13   2   45.64   21.42
   4  13  -1   45.69   20.03
   4  13  -1   55.90   21.57
  -4  13   1   47.73   17.64
  -4  13   1   21.87   17.39
   4  13   0    8.52   20.18
   4  13   0    1.94   18.08
  -4  13   0   10.46   14.80
  -4  13   0   -5.43   14.95
   4  13   1   66.61   18.83
   4  13   1   56.10   20.48
   4  13   2   10.01   18.08
   4  13   2   -4.93   18.78
   4  13   3   69.15   19.23
   4  13   3   65.36   20.33
   4  13   4    4.63   18.48
   4  13   4    0.75   17.74
   5   0 -22   44.74   13.65
  -5   0  22   47.33   12.01
  -5   0  22   48.77   12.26
   5   0 -21   -3.24   12.50
  -5   0  21   -1.94   10.91
  -5   0  21   -6.83   11.06
   5   0 -20   34.28    9.81
  -5   0  20    6.48    9.62
  -5   0  20   36.52   10.96
   5   0 -19   -5.58   10.01
  -5   0  19  -18.58   11.16
  -5   0  19   -0.90    9.81
   5   0 -18  751.30   35.42
  -5   0  18  843.96   38.51
  -5   0  18  755.28   35.67
   5   0 -17    6.18    8.87
  -5   0  17   -5.18    9.27
   5   0 -16 1055.20   47.53
  -5   0  16 1110.50   49.52
   5   0 -15   11.81    9.42
  -5   0  15    9.12    9.02
   5   0 -14 1365.09   60.18
  -5   0  14 1254.48   55.50
   5   0 -13   -1.05    8.57
  -5   0  13  -14.90    7.72
   5   0 -12  889.30   40.95
  -5   0  12  771.72   36.27
   5   0 -11    9.86    8.42
  -5   0  11   12.70    8.47
   5   0 -10  128.29   12.41
  -5   0  10  143.93   11.91
   5   0  -9    6.38    7.87
  -5   0   9  -10.21    7.42
   5   0  -8  297.13   17.39
  -5   0   8  324.63   18.04
   5   0  -7   11.76    7.52
  -5   0   7    3.94    8.27
   5   0  -6 2658.43  112.49
  -5   0   6 2804.90  118.57
   5   0  -5   -5.33    6.93
  -5   0   5   19.48    7.67
   5   0  -4 6441.81  268.33
  -5   0   4 6391.99  266.29
   5   0  -3  -10.76    8.22
  -5   0   3   -2.89    7.22
   5   0  -2 3753.98  157.53
  -5   0   2 3857.11  161.82
   5   0  -1    2.34    7.52
  -5   0   1    4.98    7.92
   5   0   0  651.16   29.89
  -5   0   0  679.06   31.49
   5   0   1   -9.02    7.47
  -5   0  -1   -6.68    8.27
   5   0   2   57.34    8.12
  -5   0  -2   43.59    9.22
   5   0   3  -10.06    6.83
  -5   0  -3   -0.65    8.42
   5   0   4 1895.67   80.66
  -5   0  -4 1915.10   81.71
   5   0   5   -0.90    7.02
  -5   0  -5    3.54    8.27
   5   0   6 3666.80  154.00
  -5   0  -6 3806.79  159.63
   5   0   7   -6.13    7.87
  -5   0  -7  -25.76    9.02
   5   0   8 3139.20  131.97
  -5   0  -8 3211.94  135.41
   5   0   9    2.64    8.02
   5   0   9   -3.29    8.22
  -5   0  -9    1.15    8.77
   5   0  10  545.54   26.16
   5   0  10  575.93   27.70
  -5   0 -10  614.79   29.34
   5   0  11   10.21    9.76
   5   0  11   -2.89    8.52
  -5   0 -11    7.77    8.92
   5   0  12   22.57    8.92
   5   0  12   23.42    9.27
  -5   0 -12   28.20   10.36
   5   0  13    3.59    9.81
   5   0  13   -3.49    8.97
  -5   0 -13   -3.84   10.26
   5   0  14  448.68   23.42
   5   0  14  418.00   22.52
   5   0  15    7.42    9.76
   5   0  15    3.04   10.26
   5   0  16  914.21   41.25
   5   0  16 1001.39   45.19
   5   0  17    4.33   10.46
   5   0  17   -3.79   11.61
   5   0  18  707.45   33.73
   5   0  18  731.86   35.17
   5   0  19    8.27   12.60
   5   0  19    4.63   13.25
   5   0  20  450.63   24.81
   5   0  20  477.23   26.01
   5   0  21  -14.20   14.35
   5   0  21   13.10   14.65
   5  -1 -22    9.22   11.56
  -5  -1  22   -5.28   12.41
  -5  -1  22  -13.85   11.71
   5   1 -22   15.25   13.65
  -5   1  22    0.90   12.70
  -5   1  22  -10.06   11.41
   5  -1 -21  -15.79   11.76
  -5  -1  21    5.08   10.06
  -5  -1  21   -9.91   11.06
   5   1 -21   -4.93   13.05
  -5   1  21  -10.91   11.81
  -5   1  21   -1.10   12.11
   5  -1 -20    3.84   10.86
  -5  -1  20   17.09    9.76
  -5  -1  20    2.59    9.32
   5   1 -20   18.63   10.46
  -5   1  20    0.90   10.56
  -5   1  20   17.04   10.96
   5  -1 -19  254.14   16.89
  -5  -1  19  216.07   15.59
  -5  -1  19  208.20   14.95
   5   1 -19  222.55   15.54
  -5   1  19  268.03   16.84
  -5   1  19  224.69   16.19
   5  -1 -18   16.64   10.41
  -5  -1  18    7.77    8.77
  -5  -1  18   13.80    9.96
   5   1 -18   16.34   10.61
  -5   1  18   31.64   10.21
  -5   1  18   25.96   10.16
   5  -1 -17 1177.26   52.76
  -5  -1  17 1115.98   49.82
   5   1 -17 1162.32   51.91
  -5   1  17 1109.01   49.97
  -5   1  17 1225.09   54.06
   5  -1 -16   21.17    9.72
  -5  -1  16   21.37    9.17
   5   1 -16   18.13    9.37
  -5   1  16   18.48    9.76
   5  -1 -15 2290.75   98.30
  -5  -1  15 2163.21   92.47
   5   1 -15 2186.63   93.81
  -5   1  15 2185.13   93.91
   5  -1 -14  193.10   15.20
  -5  -1  14  183.69   13.15
   5   1 -14  181.25   13.25
  -5   1  14  178.31   14.00
   5  -1 -13  380.03   21.02
  -5  -1  13  363.24   19.53
   5   1 -13  367.23   19.83
  -5   1  13  312.47   18.53
   5  -1 -12   -5.73    8.62
  -5  -1  12    0.15    7.02
   5   1 -12    4.18    9.81
  -5   1  12    1.54    8.02
   5  -1 -11   29.99   10.31
  -5  -1  11   35.62    8.12
   5   1 -11   28.55    9.96
  -5   1  11   28.70    9.42
   5  -1 -10   60.78   11.11
  -5  -1  10   58.89    9.52
   5   1 -10   71.59   10.56
  -5   1  10   61.83   10.06
   5  -1  -9  121.26   10.96
  -5  -1   9  115.33   10.91
   5   1  -9  135.06   11.86
  -5   1   9  127.94   11.86
   5  -1  -8  357.91   19.38
  -5  -1   8  338.48   18.43
   5   1  -8  351.43   18.98
  -5   1   8  363.19   19.78
   5  -1  -7 1332.20   58.39
  -5  -1   7 1310.78   57.09
   5   1  -7 1338.18   58.39
  -5   1   7 1232.06   54.25
   5  -1  -6  114.49   11.36
  -5  -1   6  117.63   10.91
   5   1  -6  126.00   10.81
  -5   1   6  113.44   10.21
   5  -1  -5 7219.01  300.67
  -5  -1   5 7144.28  297.38
   5   1  -5 7498.00  312.08
  -5   1   5 7099.44  295.44
   5  -1  -4  404.69   20.97
  -5  -1   4  391.34   20.18
   5   1  -4  384.86   20.33
  -5   1   4  372.11   19.63
   5  -1  -3 2640.00  111.55
  -5  -1   3 2580.21  109.21
   5   1  -3 2544.34  107.81
  -5   1   3 2595.65  109.85
   5  -1  -2    3.94    6.53
  -5  -1   2   10.61    7.52
   5   1  -2   22.22    7.87
  -5   1   2   11.81    7.27
   5  -1  -1  666.10   30.54
  -5  -1   1  696.49   32.28
   5   1  -1  691.01   32.18
  -5   1   1  724.89   33.13
   5  -1   0  233.01   13.60
  -5  -1   0  229.82   14.65
   5   1   0  236.65   14.65
  -5   1   0  231.82   13.75
   5  -1   1   30.34    7.17
  -5  -1  -1   37.17    9.57
   5   1   1   52.56    9.32
  -5   1  -1   38.46    8.07
   5  -1   2  247.76   13.85
  -5  -1  -2  221.35   14.85
   5   1   2  229.17   14.15
  -5   1  -2  237.35   14.05
   5  -1   3 1135.41   49.02
  -5  -1  -3 1045.73   46.38
   5   1   3 1127.44   49.92
  -5   1  -3 1111.50   48.62
   5  -1   4  147.32   10.81
  -5  -1  -4  130.03   11.46
   5   1   4  142.54   12.11
  -5   1  -4  147.92   11.51
   5  -1   5 3508.37  147.27
  -5  -1  -5 3652.35  153.45
   5   1   5 3757.47  157.58
  -5   1  -5 3523.81  147.72
   5  -1   6   -5.58    6.83
  -5  -1  -6   -1.20    9.27
   5   1   6    0.65    7.22
  -5   1  -6    8.37    8.47
   5  -1   7 3228.87  135.36
  -5  -1  -7 3053.51  128.94
   5   1   7 3279.19  138.50
  -5   1  -7 3240.33  136.26
   5  -1   8   15.10    7.57
  -5  -1  -8   29.44    9.81
   5   1   8   10.71    8.87
  -5   1  -8   30.59    8.82
   5  -1   9 2221.00   94.66
   5  -1   9 2076.03   88.08
  -5  -1  -9 2158.73   92.42
   5   1   9 2245.91   95.41
   5   1   9 2378.94  102.08
  -5   1  -9 2289.26   97.40
   5  -1  10   23.86    8.72
   5  -1  10   16.94    7.87
  -5  -1 -10   14.20    9.81
   5   1  10   -9.47    8.52
   5   1  10   21.17    9.91
  -5   1 -10   -2.24    8.22
   5  -1  11   62.67    9.76
   5  -1  11   47.58    8.57
  -5  -1 -11   58.59   10.61
   5   1  11   68.80   10.01
   5   1  11   73.54   10.71
  -5   1 -11   80.86   10.31
   5  -1  12    6.43    8.97
   5  -1  12   15.59    9.76
  -5  -1 -12   11.11   10.21
   5   1  12   20.33    9.52
   5   1  12   10.86   10.31
  -5   1 -12   26.36   10.06
   5  -1  13  222.10   15.69
   5  -1  13  227.93   15.20
  -5  -1 -13  218.36   16.04
   5   1  13  255.18   17.44
   5   1  13  209.05   15.29
  -5   1 -13  196.64   14.65
   5  -1  14   14.75   10.51
   5  -1  14   24.31    9.81
  -5  -1 -14   22.72   11.71
   5   1  14   24.21   10.76
   5   1  14   28.05   10.01
   5  -1  15  631.23   30.39
   5  -1  15  662.61   30.89
   5   1  15  702.47   33.68
   5   1  15  643.68   30.54
   5  -1  16  -10.01   10.71
   5  -1  16    3.09   10.26
   5   1  16    6.38   11.46
   5   1  16   25.41   10.91
   5  -1  17  738.84   35.07
   5  -1  17  766.24   35.97
   5   1  17  744.32   34.28
   5   1  17  797.63   37.02
   5  -1  18   10.56   11.41
   5  -1  18    3.29   12.65
   5   1  18   24.66   11.41
   5   1  18   14.70   11.26
   5  -1  19  491.48   26.16
   5  -1  19  481.42   25.91
   5   1  19  483.81   25.46
   5   1  19  471.75   25.16
   5  -1  20   29.89   14.60
   5  -1  20   45.88   14.55
   5   1  20   19.58   11.96
   5   1  20   50.72   13.60
   5  -1  21  182.99   18.83
   5  -1  21  182.14   18.88
   5   1  21  183.24   17.84
   5   1  21  187.92   17.44
   5  -2 -22   60.53   14.15
  -5  -2  22   20.53   13.00
  -5  -2  22   48.03   13.15
   5   2 -22   32.03   13.95
  -5   2  22   49.27   11.36
  -5   2  22   28.20   11.96
   5  -2 -21   20.18   10.61
  -5  -2  21   -2.24   13.45
  -5  -2  21    2.94   11.91
   5   2 -21   30.39   12.21
  -5   2  21   15.29   10.56
  -5   2  21   13.70   11.31
   5  -2 -20   43.24   13.00
  -5  -2  20   49.47   10.96
  -5  -2  20   65.51   12.01
   5   2 -20   36.92   11.06
  -5   2  20   67.01   13.40
  -5   2  20   30.29   10.76
   5  -2 -19   12.21   11.76
  -5  -2  19   -0.20    9.81
  -5  -2  19    5.58    9.91
   5   2 -19    0.45   10.46
  -5   2  19    9.72   11.41
  -5   2  19    6.78   10.11
   5  -2 -18  751.79   35.57
  -5  -2  18  767.24   35.82
  -5  -2  18  670.09   31.79
   5   2 -18  685.03   32.53
  -5   2  18  658.13   32.18
  -5   2  18  697.99   33.48
   5  -2 -17    8.27   11.81
  -5  -2  17    7.07    8.97
   5   2 -17   -0.40    9.47
  -5   2  17   -4.09   11.56
  -5   2  17    7.62   10.31
   5  -2 -16 1279.89   57.14
  -5  -2  16 1304.80   57.24
   5   2 -16 1394.98   61.33
  -5   2  16 1420.88   62.97
  -5   2  16 1270.43   56.85
   5  -2 -15   40.90   10.01
  -5  -2  15   42.20    8.82
   5   2 -15   40.06    9.86
  -5   2  15   41.20   12.70
   5  -2 -14 1438.32   63.62
  -5  -2  14 1417.40   61.63
   5   2 -14 1384.52   60.43
  -5   2  14 1490.63   65.96
   5  -2 -13    4.53    9.67
  -5  -2  13   11.06    8.12
   5   2 -13    5.38    7.77
  -5   2  13    4.38   10.76
   5  -2 -12  304.40   19.13
  -5  -2  12  353.23   18.93
   5   2 -12  336.44   18.83
  -5   2  12  363.19   20.58
   5  -2 -11   91.37   11.76
  -5  -2  11   98.94   10.16
   5   2 -11  108.91   11.31
  -5   2  11  105.32   11.11
   5  -2 -10   99.49   11.81
  -5  -2  10   93.02    9.27
   5   2 -10   88.83   10.66
  -5   2  10   79.12   10.71
   5  -2  -9   77.72   11.11
  -5  -2   9   75.83    8.47
   5   2  -9   78.97    9.72
  -5   2   9   69.15   10.56
   5  -2  -8 1041.75   46.53
  -5  -2   8 1087.58   48.03
   5   2  -8 1003.39   44.69
  -5   2   8 1057.19   47.38
   5  -2  -7   14.40    7.87
  -5  -2   7   14.55    7.67
   5   2  -7   16.09    7.87
  -5   2   7    6.78    8.32
   5  -2  -6 2360.00  100.29
  -5  -2   6 2349.54   99.94
   5   2  -6 2313.67   98.25
  -5   2   6 2399.86  101.98
   5  -2  -5  537.07   25.96
  -5  -2   5  576.92   27.60
   5   2  -5  569.95   27.15
  -5   2   5  526.60   25.56
   5  -2  -4 4468.91  187.13
  -5  -2   4 4453.47  186.43
   5   2  -4 4281.58  179.40
  -5   2   4 4180.45  175.17
   5  -2  -3   83.35    9.22
  -5  -2   3   70.50    8.87
   5   2  -3   90.97   10.21
  -5   2   3   79.91    9.72
   5  -2  -2 2334.10   98.84
  -5  -2   2 2272.82   96.50
   5   2  -2 2445.20  103.93
  -5   2   2 2321.14   98.40
   5  -2  -1  474.29   22.42
  -5  -2   1  442.26   22.37
   5   2  -1  459.50   23.27
  -5   2   1  487.99   23.61
   5  -2   0  293.09   15.00
  -5  -2   0  289.71   16.54
   5   2   0  312.52   17.69
  -5   2   0  286.22   15.79
   5  -2   1  442.56   20.92
  -5  -2  -1  445.35   22.62
   5   2   1  464.68   23.57
  -5   2  -1  447.99   21.42
   5  -2   2  124.30    9.07
  -5  -2  -2  127.74   11.91
   5   2   2  126.39   11.51
  -5   2  -2  124.10    9.76
   5  -2   3  222.85   12.85
  -5  -2  -3  220.56   14.70
   5   2   3  214.08   14.25
  -5   2  -3  218.91   12.95
   5  -2   4 2946.39  123.51
  -5  -2  -4 2933.44  123.70
   5   2   4 3128.74  131.88
  -5   2  -4 3076.92  129.09
   5  -2   5  315.17   15.64
  -5  -2  -5  327.97   18.93
   5   2   5  363.64   19.83
  -5   2  -5  371.76   18.88
   5  -2   6 3528.79  147.57
  -5  -2  -6 3632.42  152.95
   5   2   6 3777.90  158.88
  -5   2  -6 3808.29  159.18
   5  -2   7    4.58    6.88
  -5  -2  -7   10.96   10.46
   5   2   7  -19.13    7.87
  -5   2  -7   -0.70    7.87
   5  -2   8 1633.62   70.05
  -5  -2  -8 1659.03   72.29
   5   2   8 1649.06   71.44
  -5   2  -8 1553.91   66.71
   5  -2   9   44.24    8.67
   5  -2   9   30.24    7.17
  -5  -2  -9   31.59   10.96
   5   2   9   27.75    9.02
   5   2   9   50.82   10.76
  -5   2  -9   35.02    8.87
   5  -2  10  712.93   32.73
   5  -2  10  680.55   30.99
  -5  -2 -10  623.26   30.49
   5   2  10  636.21   30.94
   5   2  10  584.40   28.95
  -5   2 -10  646.67   30.09
   5  -2  11    7.92    8.27
   5  -2  11   12.85    8.72
  -5  -2 -11    9.62   10.41
   5   2  11   24.61   10.91
   5   2  11  -12.31   10.46
  -5   2 -11   -2.79    8.17
   5  -2  12    9.52    9.02
   5  -2  12    3.89    8.92
  -5  -2 -12   -0.50   10.91
   5   2  12   -2.34    8.97
   5   2  12   18.08   10.96
  -5   2 -12    9.42    8.77
   5  -2  13   19.18    8.72
   5  -2  13   -6.18    9.02
  -5  -2 -13   11.86   11.26
   5   2  13   -7.82    9.17
   5   2  13  -10.81   11.21
   5  -2  14  470.36   23.81
   5  -2  14  476.63   24.31
  -5  -2 -14  458.70   24.71
   5  -2  15   30.19   10.71
   5  -2  15    4.63    9.47
   5   2  15   26.40   11.51
   5   2  15   32.73   11.31
   5  -2  16  853.93   39.21
   5  -2  16  843.46   38.56
   5   2  16  792.15   36.47
   5   2  16  875.85   40.45
   5  -2  17   -8.12   11.01
   5  -2  17    6.78   10.91
   5   2  17  -11.31   10.71
   5   2  17    1.20   11.16
   5  -2  18  606.32   30.04
   5  -2  18  650.66   31.24
   5   2  18  630.73   30.34
   5   2  18  553.51   28.20
   5  -2  19   -7.82   14.05
   5  -2  19   -6.63   13.05
   5   2  19    1.49   12.26
   5   2  19   -4.14   11.36
   5  -2  20  170.59   16.79
   5  -2  20  193.75   19.88
   5   2  20  140.05   14.05
   5   2  20  192.16   17.24
   5   2  21    4.09   14.25
   5  -3 -22   33.48   16.29
  -5  -3  22   42.95   13.85
  -5  -3  22   57.74   13.15
   5   3 -22   67.51   15.05
  -5   3  22   39.16   12.26
  -5   3  22   59.29   14.40
   5  -3 -21   -1.49   13.65
  -5  -3  21    4.68   12.60
  -5  -3  21  -10.41   11.26
   5   3 -21    4.68   13.90
  -5   3  21   -4.33   13.10
  -5   3  21   -7.37   12.75
   5  -3 -20   12.95   12.90
  -5  -3  20   25.81   10.16
  -5  -3  20   47.78   11.86
   5   3 -20   10.71   11.81
  -5   3  20    7.92   11.96
  -5   3  20   32.73   12.50
   5  -3 -19  167.70   16.19
  -5  -3  19  218.56   14.90
  -5  -3  19  200.83   15.05
   5   3 -19  215.18   15.54
  -5   3  19  251.44   18.33
  -5   3  19  210.74   15.44
   5  -3 -18    6.38   11.71
  -5  -3  18  -11.86    8.67
  -5  -3  18  -10.01   10.01
   5   3 -18    1.00    9.17
  -5   3  18    4.53   11.21
  -5   3  18   -1.69   11.21
   5  -3 -17  748.31   35.77
  -5  -3  17  690.51   32.33
   5   3 -17  736.85   34.63
  -5   3  17  729.37   33.78
  -5   3  17  729.37   35.07
   5  -3 -16   21.32   10.46
  -5  -3  16   15.20    7.77
   5   3 -16   12.31    9.47
  -5   3  16   -5.28    9.37
  -5   3  16    5.18   12.11
   5  -3 -15 1907.63   82.80
  -5  -3  15 1757.67   75.28
   5   3 -15 1861.30   80.06
  -5   3  15 1974.39   85.09
  -5   3  15 1876.24   81.61
   5  -3 -14   35.52   11.56
  -5  -3  14   34.68    8.57
   5   3 -14   40.75    8.87
  -5   3  14   28.55   11.26
   5  -3 -13 1666.50   72.64
  -5  -3  13 1708.35   73.68
   5   3 -13 1733.76   74.73
  -5   3  13 1699.38   74.28
   5  -3 -12  100.19   11.96
  -5  -3  12  117.23    9.91
   5   3 -12  111.60   10.11
  -5   3  12  105.17   13.40
   5  -3 -11   32.23   11.46
  -5  -3  11   28.05    7.47
   5   3 -11   11.66    8.97
  -5   3  11    3.39    8.32
   5  -3 -10  294.64   18.04
  -5  -3  10  331.06   17.99
   5   3 -10  290.60   16.49
  -5   3  10  244.87   16.29
   5  -3  -9   40.85   10.36
  -5  -3   9   55.70    8.32
   5   3  -9   54.70    8.87
  -5   3   9   44.59    9.17
   5  -3  -8   75.83    9.86
  -5  -3   8   80.71    9.96
   5   3  -8   65.41    9.17
  -5   3   8   53.21    9.12
   5  -3  -7 1044.74   47.08
  -5  -3   7 1070.15   47.38
   5   3  -7 1078.62   47.68
  -5   3   7  985.45   44.44
   5  -3  -6   53.51   10.21
  -5  -3   6   77.52    8.87
   5   3  -6   74.28    8.97
  -5   3   6   62.33    9.57
   5  -3  -5 4454.46  186.28
  -5  -3   5 4360.30  182.44
   5   3  -5 4430.05  185.48
  -5   3   5 4421.08  185.28
   5  -3  -4    1.39    8.02
  -5  -3   4    0.65    8.12
   5   3  -4   -0.95    7.32
  -5   3   4   -3.79    6.78
   5  -3  -3 2096.95   89.08
  -5  -3   3 2086.49   89.13
   5   3  -3 2003.29   85.64
  -5   3   3 2056.60   87.39
   5  -3  -2  337.93   17.74
  -5  -3   2  338.88   18.68
   5   3  -2  333.45   18.33
  -5   3   2  318.80   16.99
   5  -3  -1 2149.76   91.07
  -5  -3   1 2167.20   92.47
   5   3  -1 2030.19   86.64
  -5   3   1 2110.90   89.73
   5  -3   0 1101.53   47.88
  -5  -3   0 1127.44   49.97
   5   3   0 1103.03   48.92
  -5   3   0 1163.81   50.62
   5  -3   1  102.03    8.47
  -5  -3  -1   87.44   10.81
   5   3   1   98.84    9.91
  -5   3  -1   97.55    9.02
   5  -3   2   22.67    5.73
  -5  -3  -2   11.46    8.67
   5   3   2   27.05    8.57
  -5   3  -2   12.50    6.53
   5  -3   3 1962.93   82.65
  -5  -3  -3 1868.27   80.41
   5   3   3 2052.11   88.13
  -5   3  -3 2047.13   86.49
   5  -3   4   48.43    5.63
  -5  -3  -4   34.43    9.37
   5   3   4   54.70   10.21
  -5   3  -4   56.75    7.17
   5  -3   5  818.55   35.62
  -5  -3  -5  849.44   39.46
   5   3   5  823.04   37.56
  -5   3  -5  845.46   37.17
   5  -3   6   35.37    6.28
  -5  -3  -6   42.20   11.41
   5   3   6   35.02    9.86
  -5   3  -6   35.92    7.47
   5  -3   7 1978.88   83.55
  -5  -3  -7 2161.22   92.77
   5   3   7 2057.59   88.58
  -5   3  -7 2044.14   86.39
   5  -3   8  222.25   12.41
   5  -3   8  258.82   14.35
  -5  -3  -8  222.15   15.94
   5   3   8  218.16   15.25
  -5   3  -8  230.62   13.70
   5  -3   9  570.94   26.65
   5  -3   9  601.83   27.15
  -5  -3  -9  613.79   30.09
   5   3   9  654.64   31.14
   5   3   9  648.17   31.29
  -5   3  -9  610.80   28.20
   5  -3  10  130.68   11.16
   5  -3  10  121.96    9.91
  -5  -3 -10   87.24   12.65
   5   3  10  115.93   11.41
   5   3  10  125.45   13.35
  -5   3 -10  118.82    9.86
   5  -3  11    2.64    8.47
   5  -3  11   -0.40    8.12
  -5  -3 -11   13.85   11.86
   5   3  11    8.12   11.86
   5   3  11    3.14   11.96
  -5   3 -11    6.88    7.77
   5  -3  12   27.85    8.62
   5  -3  12   20.43    7.42
  -5  -3 -12   23.27   12.31
   5   3  12   38.31   13.20
   5   3  12   54.70   13.00
   5  -3  13    7.52    9.17
   5  -3  13    9.37    8.32
  -5  -3 -13   12.65   12.75
   5   3  13   13.95   11.56
   5   3  13   21.22   12.70
   5  -3  14    7.97    9.42
   5  -3  14   18.04    8.57
  -5  -3 -14    5.28   12.90
   5   3  14    8.37   10.61
   5   3  14   17.54   12.21
   5  -3  15  501.20   24.71
   5  -3  15  472.60   23.96
   5   3  15  520.13   26.80
   5   3  15  542.55   28.60
   5  -3  16   15.89   10.91
   5  -3  16   13.45   10.56
   5   3  16   -1.94   10.21
   5   3  16    7.32   11.46
   5  -3  17  664.61   31.59
   5  -3  17  657.13   32.38
   5  -3  18  -12.26   11.21
   5  -3  18  -17.39   12.90
   5   3  18    1.05   10.66
   5   3  18    6.03   12.16
   5  -3  19  332.00   21.97
   5  -3  19  394.28   23.66
   5   3  19  308.64   19.78
   5   3  19  351.68   20.58
   5  -3  20  -11.96   17.19
   5  -3  20    5.28   16.39
   5   3  20    2.49   11.96
   5   3  20  -19.23   13.55
   5  -4 -21  -14.80   15.00
  -5  -4  21  -15.25   14.45
  -5  -4  21   -3.74   12.55
   5   4 -21   -6.58   14.55
  -5   4  21    8.87   12.75
  -5   4  21    1.49   13.80
   5  -4 -20    8.62   13.60
  -5  -4  20    1.64   12.80
  -5  -4  20    1.94   11.01
   5   4 -20   -4.28   11.41
  -5   4  20  -21.22   11.26
  -5   4  20   -3.64   13.20
   5  -4 -19    9.81   12.06
  -5  -4  19   13.70   11.16
  -5  -4  19   13.80   10.21
   5   4 -19   -9.12   11.41
  -5   4  19  -12.50   13.25
  -5   4  19   -0.80   12.01
  -5  -4  18  308.49   18.18
  -5  -4  18  332.95   19.03
   5   4 -18  309.09   18.23
  -5   4  18  300.57   20.38
  -5   4  18  291.55   19.23
   5  -4 -17   88.18   12.80
  -5  -4  17   86.44    9.96
   5   4 -17  105.37   11.11
  -5   4  17  109.56   12.95
  -5   4  17   80.56   14.00
   5  -4 -16 1136.41   51.56
  -5  -4  16 1114.49   49.22
   5   4 -16 1165.30   51.61
  -5   4  16 1146.87   51.61
  -5   4  16 1146.87   51.76
   5  -4 -15    7.47   11.56
  -5  -4  15   15.79    8.07
   5   4 -15   37.71    9.17
  -5   4  15   17.84   12.70
  -5   4  15   22.52   11.06
   5  -4 -14 1039.76   47.58
  -5  -4  14 1018.33   45.24
   5   4 -14 1130.43   50.27
  -5   4  14 1096.55   48.92
  -5   4  14 1101.53   49.92
   5  -4 -13   66.41   11.41
  -5  -4  13   84.65    9.81
   5   4 -13   81.11    9.47
  -5   4  13   82.50   11.16
  -5   4  13   78.22   12.21
   5  -4 -12  707.45   33.38
  -5  -4  12  705.46   32.43
   5   4 -12  662.12   30.84
  -5   4  12  704.46   34.33
   5  -4 -11  114.09   11.56
  -5  -4  11  126.69   10.06
   5   4 -11  118.42   11.26
  -5   4  11  114.34   12.70
   5  -4 -10   13.25   10.76
  -5  -4  10    7.97    7.22
   5   4 -10   11.01    7.87
  -5   4  10   15.54    8.72
   5  -4  -9   99.14   12.41
  -5  -4   9  130.68   10.31
   5   4  -9  104.77    9.91
  -5   4   9  101.68   11.71
   5  -4  -8  563.97   27.95
  -5  -4   8  557.99   26.26
   5   4  -8  625.25   29.34
  -5   4   8  584.40   28.70
   5  -4  -7   31.89    9.17
  -5  -4   7   43.19    8.27
   5   4  -7   26.90    8.32
  -5   4   7   30.99    9.47
   5  -4  -6 2306.70   98.15
  -5  -4   6 2448.19  103.93
   5   4  -6 2478.08  105.07
  -5   4   6 2296.23   97.95
   5  -4  -5   14.70    9.17
  -5  -4   5   37.91    8.27
   5   4  -5   25.41    8.17
  -5   4   5   11.61    8.32
   5  -4  -4 2969.81  125.40
  -5  -4   4 2926.46  123.36
   5   4  -4 2936.43  123.95
  -5   4   4 2948.38  124.50
   5  -4  -3   33.43    8.22
  -5  -4   3   47.18    8.82
   5   4  -3   30.14    8.42
  -5   4   3   23.91    7.42
   5  -4  -2 1283.38   55.75
  -5  -4   2 1217.62   53.66
   5   4  -2 1099.04   48.62
  -5   4   2 1241.03   54.01
   5  -4  -1  118.17   10.01
  -5  -4   1  112.10   11.21
   5   4  -1  125.05   11.21
  -5   4   1   98.20    8.97
   5  -4   0  383.72   18.78
  -5  -4   0  378.04   19.98
   5   4   0  388.55   20.58
  -5   4   0  378.19   18.73
   5  -4   1  471.80   21.72
  -5  -4  -1  461.39   24.16
   5   4   1  427.96   22.22
  -5   4  -1  441.46   21.17
   5  -4   2 1048.72   45.04
  -5  -4  -2  996.91   45.29
   5   4   2 1013.35   45.59
  -5   4  -2 1058.69   45.79
   5  -4   3  729.37   31.98
  -5  -4  -3  681.05   32.58
   5   4   3  695.50   32.93
  -5   4  -3  736.35   32.48
   5  -4   4 2744.62  114.94
  -5  -4  -4 2675.37  113.84
   5   4   4 2667.40  113.14
  -5   4  -4 2748.11  115.04
   5  -4   5  136.51    8.47
  -5  -4  -5  135.61   14.05
   5   4   5  131.43   12.80
  -5   4  -5  143.88    9.37
   5  -4   6 1898.17   79.71
  -5  -4  -6 1862.30   80.81
   5   4   6 1853.33   80.16
  -5   4  -6 1915.10   80.61
   5  -4   7   30.24    4.73
  -5  -4  -7   22.22    9.96
   5   4   7   13.25    9.47
  -5   4  -7   21.42    5.88
   5  -4   8  732.36   31.79
   5  -4   8  687.03   30.24
  -5  -4  -8  756.78   36.52
   5   4   8  742.33   35.17
   5   4   8  873.85   41.35
  -5   4  -8  715.92   31.49
   5  -4   9   20.23    5.98
   5  -4   9   23.86    6.53
  -5  -4  -9    1.79   11.51
   5   4   9   28.30   11.51
   5   4   9   10.31   10.81
  -5   4  -9   17.89    6.18
   5  -4  10  259.07   13.45
   5  -4  10  286.87   15.05
  -5  -4 -10  322.94   20.92
   5   4  10  344.51   21.72
   5   4  10  285.27   19.08
   5  -4  11  437.77   20.87
   5  -4  11  420.29   19.63
  -5  -4 -11  466.22   25.96
   5  -4  12   80.86    8.77
   5  -4  12   67.81    8.82
  -5  -4 -12   82.15   13.60
   5   4  12   85.79   12.65
   5   4  12  107.21   14.30
   5  -4  13  359.85   17.64
   5  -4  13  385.21   19.43
  -5  -4 -13  438.57   25.51
   5   4  13  425.92   24.11
   5   4  13  400.11   22.07
   5  -4  14  259.57   14.90
   5  -4  14  256.88   15.49
  -5  -4 -14  300.87   19.63
   5   4  14  309.04   19.88
   5   4  14  304.01   18.98
   5  -4  15   26.06   10.61
   5  -4  15   -6.18    9.17
   5   4  15   15.59   12.36
   5   4  15  -10.86   12.06
   5  -4  16  583.90   28.30
   5  -4  16  583.40   27.85
   5   4  16  631.23   31.44
   5   4  16  622.76   30.44
   5  -4  17   11.06   11.56
   5  -4  17   21.82   13.05
   5   4  17    8.12   11.91
   5   4  17    0.75   12.36
   5  -4  18  476.04   25.96
   5  -4  18  470.11   27.05
   5   4  18  549.02   28.60
   5   4  18  522.62   27.55
   5  -4  19    2.44   15.99
   5  -4  19   20.97   15.74
   5   4  19   10.11   12.90
   5   4  19    3.19   13.15
   5  -4  20  158.23   20.97
   5  -4  20  170.54   21.12
   5   4  20  210.74   16.59
   5   4  20  235.90   16.79
   5  -5 -21  -16.74   15.89
  -5  -5  21    9.17   13.60
  -5  -5  21   18.58   15.69
   5   5 -21   -2.49   15.94
  -5   5  21   -2.09   12.36
  -5   5  21    7.37   13.80
   5  -5 -20   46.68   14.90
  -5  -5  20   68.05   13.90
  -5  -5  20   31.54   14.50
   5   5 -20   49.62   13.65
  -5   5  20   30.99   13.35
  -5   5  20   44.29   13.20
   5  -5 -19   64.77   13.60
  -5  -5  19   42.70   13.20
  -5  -5  19   78.22   13.05
   5   5 -19   97.05   14.55
  -5   5  19   50.47   14.15
  -5   5  19   62.82   13.15
   5  -5 -18   92.17   12.21
  -5  -5  18   85.09   10.36
  -5  -5  18   63.57   11.46
   5   5 -18  104.92   12.41
  -5   5  18   64.97   13.95
  -5   5  18   70.30   12.55
   5  -5 -17  798.62   38.01
  -5  -5  17  756.78   34.72
   5   5 -17  817.06   37.42
  -5   5  17  823.53   39.21
  -5   5  17  765.24   36.87
   5  -5 -16    9.52   11.21
  -5  -5  16   13.15    8.27
   5   5 -16   30.89    9.12
  -5   5  16    6.03   11.36
  -5   5  16   36.57   12.11
   5  -5 -15  723.40   34.82
  -5  -5  15  680.05   31.34
   5   5 -15  754.28   34.92
  -5   5  15  682.04   32.83
  -5   5  15  757.27   36.07
   5  -5 -14    0.20    9.81
  -5  -5  14    8.07    8.07
   5   5 -14   23.61    8.77
  -5   5  14   27.45   10.76
  -5   5  14   12.95   10.36
   5  -5 -13  816.06   38.16
  -5  -5  13  807.59   36.32
   5   5 -13  835.99   37.81
  -5   5  13  823.53   38.86
  -5   5  13  795.14   37.42
   5  -5 -12  172.08   15.25
  -5  -5  12  188.22   11.81
   5   5 -12  203.82   13.20
  -5   5  12  165.45   14.20
  -5   5  12  182.79   15.54
   5  -5 -11   10.26   10.16
  -5  -5  11    2.14    6.43
   5   5 -11   27.05    8.37
  -5   5  11   -1.15   11.41
  -5   5  11   11.46    9.62
   5  -5 -10  341.47   19.23
  -5  -5  10  370.62   18.63
   5   5 -10  346.20   18.68
  -5   5  10  338.93   20.78
   5  -5  -9   -2.19    9.67
  -5  -5   9    3.19    7.82
   5   5  -9   17.09    7.77
  -5   5   9    5.48    8.67
   5   5  -8  126.69   11.16
  -5   5   8  134.27   12.60
   5  -5  -7 1054.70   47.98
  -5  -5   7 1001.89   44.14
   5   5  -7  993.42   44.29
  -5   5   7  962.53   43.74
   5  -5  -6   12.21    9.32
  -5  -5   6   33.83    7.67
   5   5  -6    0.05    7.47
  -5   5   6   20.87    8.77
   5  -5  -5 3156.14  132.92
  -5  -5   5 3315.56  139.40
   5   5  -5 3034.57  128.09
  -5   5   5 3029.09  127.94
   5  -5  -4    6.58    8.82
  -5  -5   4    9.67    8.42
   5   5  -4    7.32    8.12
  -5   5   4   -6.08    7.87
   5  -5  -3 1602.23   68.60
  -5  -5   3 1598.25   69.10
   5   5  -3 1603.73   69.45
  -5   5   3 1600.24   69.05
   5  -5  -2   15.34    6.88
  -5  -5   2    5.33    8.12
   5   5  -2   19.38    8.02
  -5   5   2   10.81    7.57
   5  -5  -1  366.48   18.58
  -5  -5   1  358.36   19.93
   5   5  -1  340.57   18.73
  -5   5   1  360.95   18.53
   5  -5   0   17.89    7.32
  -5  -5   0    9.91    9.96
   5   5   0    9.62    7.57
  -5   5   0   17.54    6.28
   5   5   1   48.72    9.72
  -5   5  -1   48.28    6.43
   5  -5   2   58.04    6.88
  -5  -5  -2   48.92   11.56
   5   5   2   64.37   10.31
  -5   5  -2   34.63    6.68
   5  -5   3 1043.24   44.79
  -5  -5  -3 1010.86   45.79
   5   5   3 1025.81   46.03
  -5   5  -3 1066.16   45.79
   5   5   4  345.95   19.43
  -5   5  -4  353.88   16.74
   5  -5   5 3051.51  127.44
  -5  -5  -5 2928.46  124.55
   5   5   5 2804.40  118.92
  -5   5  -5 2906.04  121.51
   5   5   6  235.00   15.94
  -5   5  -6  225.69   10.96
   5  -5   7 1622.16   68.65
   5  -5   7 1822.44   77.02
  -5  -5  -7 1699.38   74.33
   5   5   7 1723.79   75.33
  -5   5  -7 1579.81   66.76
   5  -5   8   14.85    3.19
   5  -5   8   11.26    3.09
  -5  -5  -8   19.13   12.46
   5   5   8   15.89   11.11
   5   5   8   -1.64   11.76
  -5  -5  -9  677.06   33.83
   5   5   9  742.33   36.07
   5   5   9  783.68   37.17
   5  -5  10  147.62    7.22
   5  -5  10  124.45    6.93
  -5  -5 -10  134.12   14.40
   5   5  10  132.77   13.15
   5   5  10   98.79   13.75
   5  -5  11  250.90   11.71
   5  -5  11  258.62   12.26
  -5  -5 -11  282.33   19.43
   5   5  11  287.32   19.48
   5   5  11  263.75   18.13
   5  -5  12  221.70   10.76
   5  -5  12  189.42   10.06
  -5  -5 -12  209.84   17.39
   5   5  12  194.25   15.49
   5   5  12  230.42   17.84
   5  -5  13   82.60    7.02
   5  -5  13   66.71    6.53
  -5  -5 -13   94.56   13.65
   5   5  13   77.92   12.75
   5   5  13   79.71   12.80
   5  -5  14   49.42    7.12
   5  -5  14   61.83    6.93
  -5  -5 -14   58.44   14.15
   5   5  14   68.25   13.10
   5   5  14   96.10   13.95
   5  -5  15  467.92   21.77
   5  -5  15  463.18   21.72
   5   5  15  482.46   24.81
   5   5  15  465.57   24.76
   5  -5  16   -9.02    7.92
   5  -5  16    5.48    7.82
   5   5  16   -1.99   10.81
   5   5  16   19.18   12.55
   5  -5  17  447.99   22.07
   5  -5  17  397.37   19.88
   5   5  17  462.39   25.56
   5   5  17  520.13   26.80
   5  -5  18   35.47   11.46
   5  -5  18   16.79   11.16
   5   5  18    6.88   13.35
   5   5  18   20.33   12.46
   5  -5  19  316.31   20.38
   5  -5  19  328.07   19.98
   5   5  19  408.73   24.21
   5   5  19  424.27   23.66
   5  -6 -20   66.96   13.65
  -5  -6  20   31.79   16.39
  -5  -6  20   52.31   13.95
   5   6 -20   49.32   17.84
  -5   6  20   54.55   13.85
  -5   6  20   34.18   12.60
   5  -6 -19   53.66   14.10
  -5  -6  19   33.33   11.91
  -5  -6  19   49.72   14.80
   5   6 -19   54.01   16.19
  -5   6  19   59.59   14.65
  -5   6  19   48.48   13.35
   5  -6 -18  254.63   17.99
  -5  -6  18  257.42   18.04
  -5  -6  18  313.42   18.18
   5   6 -18  283.83   19.03
  -5   6  18  285.47   19.28
  -5   6  18  297.93   20.58
   5  -6 -17   26.50   11.11
  -5  -6  17   14.40    9.27
   5   6 -17    4.83   10.51
  -5   6  17    2.99   12.01
  -5   6  17   37.27   11.81
   5  -6 -16 1168.79   52.66
  -5  -6  16  989.44   43.74
   5   6 -16 1056.70   46.88
  -5   6  16 1013.85   46.13
  -5   6  16 1113.49   50.82
   5  -6 -15   11.01   10.11
  -5  -6  15   20.63    8.42
   5   6 -15   19.58    9.17
  -5   6  15   13.60   12.70
  -5   6  15   29.15   10.66
   5  -6 -14  722.40   34.77
  -5  -6  14  694.00   31.89
   5   6 -14  758.27   34.58
  -5   6  14  663.11   32.63
  -5   6  14  666.60   32.58
   5  -6 -13  136.76   13.30
  -5  -6  13  167.85   12.01
   5   6 -13  162.96   12.01
  -5   6  13  147.12   13.85
  -5   6  13  152.00   14.25
   5  -6 -12  254.04   16.59
  -5  -6  12  271.47   15.29
   5   6 -12  269.78   15.74
  -5   6  12  278.05   18.93
  -5   6  12  247.66   17.19
   5  -6 -11  607.81   29.49
  -5  -6  11  661.62   30.49
   5   6 -11  713.43   32.73
  -5   6  11  676.56   32.73
  -5   6  11  682.54   33.43
   5  -6 -10   21.47   10.16
  -5  -6  10   30.79    7.72
   5   6 -10   25.21    7.52
  -5   6  10   26.21    9.72
  -5   6  10   26.50   11.81
   5  -6  -9   37.96   11.56
  -5  -6   9   71.29    8.47
   5   6  -9   65.91    9.96
  -5   6   9   43.94   10.96
  -5   6   9   63.77   10.96
   5  -6  -8  551.51   27.85
  -5  -6   8  573.93   26.95
  -5   6   8  512.16   25.96
  -5   6   8  522.12   26.26
   5  -6  -7  102.78   11.21
  -5  -6   7   86.84   10.31
   5   6  -7  103.33   10.16
  -5   6   7   82.70   10.81
   5  -6  -6 1302.31   56.99
  -5  -6   6 1289.36   56.10
   5   6  -6 1306.30   57.24
  -5   6   6 1297.83   57.14
   5  -6  -5   57.79    9.67
  -5  -6   5   46.93    8.67
   5   6  -5   59.09    8.92
  -5   6   5   39.86    8.77
   5  -6  -4 1881.73   80.61
  -5  -6   4 1850.84   79.21
   5   6  -4 1825.93   78.57
  -5   6   4 1988.34   85.19
   5  -6  -3   36.32    8.92
  -5  -6   3   28.35    9.62
   5   6  -3   30.04    8.62
  -5   6   3   12.16    7.37
   5  -6  -2 1158.33   51.02
  -5  -6   2 1059.68   47.23
   5   6  -2 1101.53   48.97
  -5   6   2 1106.02   48.62
   5  -6  -1   71.24    8.22
  -5  -6   1   46.98    9.27
   5   6  -1   61.93    9.76
  -5   6   1   43.64    7.12
   5  -6   0  152.60   10.56
  -5  -6   0  117.13   12.60
   5   6   0  115.09   11.51
  -5   6   0  125.20    9.67
   5  -6   1  501.69   23.17
  -5  -6  -1  478.28   25.31
   5   6   1  435.23   22.72
  -5   6  -1  433.09   20.73
   5  -6   2   65.81    6.97
  -5  -6  -2   58.39   11.26
   5   6   2   68.90   10.76
  -5   6  -2   51.02    6.88
   5  -6   3   31.04    5.33
  -5  -6  -3   31.14   12.36
   5   6   3   51.71    9.76
  -5   6  -3   31.69    5.53
   5   6   4  542.55   27.25
  -5   6  -4  573.44   25.16
  -5  -6  -5   37.76   12.06
   5   6   5   23.76   10.01
  -5  -6  -6 1456.26   64.62
   5   6   6 1531.98   67.36
  -5  -6  -7  228.93   17.74
   5   6   7  248.41   18.33
   5   6   7  224.19   16.69
  -5  -6  -8 1249.50   56.60
   5   6   8 1203.67   53.81
   5   6   8 1112.49   50.77
  -5  -6  -9   20.73   13.75
   5   6   9   35.42   13.05
   5   6   9   43.39   12.50
  -5  -6 -10  485.95   26.31
   5   6  10  424.27   23.71
   5   6  10  406.49   22.77
  -5  -6 -11  236.85   17.79
   5   6  11  228.63   17.29
   5   6  11  271.17   18.88
  -5  -6 -12   20.92   11.91
   5   6  12    2.59   10.86
   5   6  12  -14.60   11.51
  -5  -6 -13  186.68   16.79
   5   6  13  226.04   16.34
   5   6  13  205.11   16.99
  -5  -6 -14  174.12   15.54
   5   6  14  167.65   15.64
   5   6  14  203.52   15.84
   5   6  15   -0.60   11.76
   5   6  15   -5.68   11.16
   5   6  16  349.94   20.63
   5   6  16  386.16   21.87
   5   6  17    5.98   13.35
   5   6  17    2.09   13.45
   5   6  18  382.62   21.92
   5   6  18  343.96   21.32
  -5  -7  19  137.65   22.52
  -5  -7  19  104.42   17.94
   5   7 -19  133.97   20.97
  -5   7  19  146.57   16.19
  -5   7  19   91.37   13.30
   5  -7 -18    3.74   13.70
  -5  -7  18   24.06   18.58
  -5  -7  18  -17.34   12.90
   5   7 -18   19.13   16.24
  -5   7  18   -5.23   13.45
  -5   7  18  -11.36   12.85
   5  -7 -17  453.52   24.26
  -5  -7  17  471.95   24.91
  -5  -7  17  428.66   23.37
   5   7 -17  450.83   24.86
  -5   7  17  394.43   22.57
  -5   7  17  438.17   25.46
   5  -7 -16   21.12   13.35
  -5  -7  16   -1.89   10.81
   5   7 -16   -2.79   11.51
  -5   7  16   -9.67   12.06
  -5   7  16   13.95   13.15
   5  -7 -15  363.74   21.57
  -5  -7  15  392.79   21.02
   5   7 -15  407.98   21.77
  -5   7  15  341.17   20.38
  -5   7  15  334.99   21.37
   5  -7 -14    6.88   10.91
  -5  -7  14   14.95    8.62
   5   7 -14    5.88    9.12
  -5   7  14   15.54   10.91
  -5   7  14   26.95   11.86
   5  -7 -13  498.70   25.11
  -5  -7  13  510.66   24.56
   5   7 -13  486.65   24.06
  -5   7  13  486.30   26.36
  -5   7  13  482.81   25.16
   5  -7 -12   76.13   12.85
  -5  -7  12   80.66    9.37
   5   7 -12   64.22    9.37
  -5   7  12   67.81   12.90
  -5   7  12   76.33   13.00
   5  -7 -11    8.07   10.61
  -5  -7  11   -1.79    8.52
   5   7 -11   -6.48    8.37
  -5   7  11    5.13   10.96
  -5   7  11   -2.24   11.76
   5  -7 -10  152.80   12.95
  -5  -7  10  159.48   11.71
   5   7 -10  132.97   11.11
  -5   7  10  143.93   14.80
  -5   7  10  153.05   14.90
   5  -7  -9   16.24   10.86
  -5  -7   9   25.21    8.97
   5   7  -9   33.43   10.01
  -5   7   9   11.86   11.61
  -5   7   9   29.59   13.00
   5  -7  -8  105.12   11.76
  -5  -7   8  138.30   11.96
   5   7  -8  116.58   11.01
  -5   7   8  126.89   14.45
  -5   7   8  118.37   13.40
   5  -7  -7  908.73   42.20
  -5  -7   7  831.51   37.61
   5   7  -7  871.36   39.66
  -5   7   7  829.02   38.51
  -5   7   7  859.90   40.21
   5  -7  -6   -0.35   10.16
  -5  -7   6   23.61    8.77
   5   7  -6   16.69    8.97
  -5   7   6   32.63    9.86
  -5   7   6   20.28   11.56
   5  -7  -5 1709.84   74.08
  -5  -7   5 1778.60   76.62
   5   7  -5 1673.97   72.54
  -5   7   5 1558.39   67.66
  -5   7   5 1760.16   76.42
   5  -7  -4  175.37   12.65
  -5  -7   4  174.72   13.70
   5   7  -4  192.26   14.90
  -5   7   4  167.15   13.00
  -5   7   4  151.40   13.00
   5  -7  -3  970.01   42.75
  -5  -7   3  878.34   39.86
   5   7  -3  908.73   41.10
  -5   7   3 1008.37   45.19
  -5   7   3  860.40   39.11
   5  -7  -2  293.14   16.24
  -5  -7   2  298.03   17.79
   5   7  -2  261.86   16.54
  -5   7   2  259.71   15.10
  -5   7   2  288.41   16.54
   5  -7  -1  416.90   20.83
  -5  -7   1  379.48   20.87
   5   7  -1  374.75   20.58
  -5   7   1  381.68   19.98
  -5   7   1  385.01   19.48
   5  -7   0  213.43   13.50
  -5  -7   0  230.12   16.39
   5   7   0  195.30   14.35
  -5   7   0  204.81   12.55
  -5   7   0  232.56   14.35
   5  -7   1   27.85    7.02
  -5  -7  -1   18.83   11.51
   5   7   1   17.49    9.81
  -5   7  -1   30.69    6.63
  -5   7  -1   23.27    7.37
   5  -7   2  191.06   11.46
  -5  -7  -2  208.55   15.99
   5   7   2  192.91   14.95
  -5   7  -2  166.40   10.11
  -5   7  -2  189.27   11.16
   5  -7   3  316.16   15.20
  -5  -7  -3  295.24   19.48
   5   7   3  276.16   17.44
  -5   7  -3  333.15   16.09
  -5   7  -3  335.89   16.19
  -5  -7  -4   18.58   12.21
   5   7   4   24.76    9.42
  -5  -7  -5  617.78   31.64
   5   7   5  674.07   33.33
  -5  -7  -6   61.93   14.05
   5   7   6   65.12   12.26
   5   7   6   72.34   13.20
  -5  -7  -7 2447.19  105.32
   5   7   7 2160.22   92.82
   5   7   7 2106.42   90.72
  -5  -7  -8  109.41   15.34
   5   7   8  118.32   14.80
   5   7   8  108.66   13.75
  -5  -7  -9  770.73   37.81
   5   7   9  721.40   35.22
   5   7   9  620.77   31.49
  -5  -7 -10  124.65   14.80
   5   7  10  168.84   15.44
   5   7  10  215.13   16.34
  -5  -7 -11   26.60   13.65
   5   7  11   48.48   12.95
   5   7  11   26.55   13.00
  -5  -7 -12  135.76   15.69
   5   7  12  158.58   14.15
   5   7  12  125.95   14.80
  -5  -7 -13   18.48   13.70
   5   7  13   13.90   11.96
   5   7  13   16.09   12.46
   5   7  14   36.12   12.21
   5   7  14   43.64   12.16
   5   7  15  310.13   19.83
   5   7  15  303.81   19.23
   5   7  16  -12.90   12.80
   5   7  16   -9.96   13.80
   5   7  17  346.40   22.07
   5   7  17  324.28   21.42
  -5  -8  18  149.91   21.52
  -5  -8  18  137.55   18.83
   5   8 -18  115.83   18.53
  -5   8  18  117.38   15.69
  -5   8  18  127.09   16.19
  -5  -8  17    8.07   15.05
  -5  -8  17    1.25   17.54
   5   8 -17    9.62   15.29
  -5   8  17   -4.88   13.70
  -5   8  17    4.58   14.80
   5  -8 -16  444.35   24.26
  -5  -8  16  419.44   24.51
   5   8 -16  452.97   25.16
  -5   8  16  410.57   22.67
  -5   8  16  447.49   25.16
   5  -8 -15   12.36   12.16
  -5  -8  15   19.98   12.46
   5   8 -15   12.36   13.95
  -5   8  15   -9.62   11.36
  -5   8  15   29.34   14.25
   5  -8 -14  236.50   17.09
  -5  -8  14  213.08   15.49
   5   8 -14  238.19   18.13
  -5   8  14  250.40   18.53
   5  -8 -13   20.78   13.30
  -5  -8  13   55.30   11.31
   5   8 -13   54.65   12.36
  -5   8  13   38.31   13.50
  -5   8  13   34.23   12.16
   5  -8 -12   29.44   11.46
  -5  -8  12   21.77    9.72
   5   8 -12   35.62   11.46
  -5   8  12   38.16   11.86
  -5   8  12    8.57   12.75
   5  -8 -11  120.02   12.55
  -5  -8  11  141.49   11.96
   5   8 -11  121.76   11.61
  -5   8  11  118.72   15.44
  -5   8  11  116.38   12.16
   5  -8 -10    8.62   11.96
  -5  -8  10   -0.35    9.27
   5   8 -10   -5.68    8.52
  -5   8  10   -9.52   12.80
  -5   8  10    4.68    9.81
   5  -8  -9   39.21   12.01
  -5  -8   9   61.13   10.41
   5   8  -9   35.17   10.21
  -5   8   9   46.03   12.16
  -5   8   9   59.04   11.96
   5  -8  -8   78.12   12.46
  -5  -8   8  110.15   11.91
   5   8  -8   83.65   10.26
  -5   8   8   81.91   12.70
  -5   8   8   94.46   14.15
   5   8  -7   99.19   12.16
  -5   8   7  145.13   15.34
  -5   8   7  131.48   13.20
   5  -8  -6  933.64   41.95
  -5  -8   6  908.23   41.35
   5   8  -6  826.03   38.16
  -5   8   6  860.40   40.50
  -5   8   6  873.36   40.11
   5  -8  -5   -9.27    9.17
  -5  -8   5   -1.10   10.41
   5   8  -5   -4.83    9.96
  -5   8   5   -0.55   10.76
  -5   8   5    9.62   10.26
   5  -8  -4  671.58   32.13
  -5  -8   4  726.38   34.68
   5   8  -4  692.51   33.38
  -5   8   4  641.19   31.54
  -5   8   4  719.41   34.03
   5  -8  -3   12.60   11.36
  -5  -8   3   31.59   12.01
   5   8  -3   17.44   11.56
  -5   8   3    2.49    9.67
  -5   8   3   19.08    9.37
   5  -8  -2  304.30   18.28
  -5  -8   2  323.83   19.78
   5   8  -2  338.13   20.08
  -5   8   2  277.85   16.19
  -5   8   2  273.91   16.79
   5  -8  -1  275.41   16.14
  -5  -8   1  290.55   20.28
   5   8  -1  281.84   19.08
  -5   8   1  281.09   16.19
  -5   8   1  231.92   15.20
   5  -8   0  103.58   10.91
  -5  -8   0  112.30   13.70
   5   8   0   92.02   12.55
  -5   8   0   84.79   10.06
  -5   8   0  107.56   10.46
  -5  -8  -1  615.78   31.64
   5   8   1  619.27   31.19
  -5   8  -1  680.05   31.34
  -5   8  -1  622.26   28.65
  -5  -8  -2   45.14   13.25
   5   8   2   56.45   12.80
  -5   8  -2   42.15    7.52
  -5   8  -2   46.13    8.27
  -5  -8  -3   27.55   13.20
   5   8   3   20.73   11.61
  -5   8  -3   17.64    5.98
  -5   8  -3   14.30    5.98
  -5  -8  -4  798.62   39.36
   5   8   4  717.42   35.52
   5   8   4  742.83   35.62
  -5  -8  -5   15.89   13.55
   5   8   5    6.23   13.00
   5   8   5    5.53   12.36
  -5  -8  -6  851.93   41.15
   5   8   6  806.10   38.06
   5   8   6  862.89   40.90
  -5  -8  -7   -5.43   12.41
   5   8   7   16.99   11.46
   5   8   7    4.88   11.66
  -5  -8  -8  471.40   25.96
   5   8   8  427.96   24.96
   5   8   8  471.70   25.86
  -5  -8  -9   47.13   14.25
   5   8   9   76.57   14.20
   5   8   9   97.30   13.60
  -5  -8 -10  193.30   16.94
   5   8  10  214.73   16.94
   5   8  10  196.79   16.94
  -5  -8 -11  113.64   15.84
   5   8  11  135.81   15.29
   5   8  11  169.54   14.85
  -5  -8 -12   11.66   13.50
   5   8  12   11.66   12.60
   5   8  12    2.84   12.90
   5   8  13   40.90   13.70
   5   8  13   56.35   13.60
   5   8  14  234.56   18.43
   5   8  14  215.82   17.94
   5   8  15   -7.62   13.35
   5   8  15  -10.66   12.80
   5   8  16  233.71   18.53
   5   8  16  210.54   17.84
  -5   9  17  110.25   17.39
  -5  -9  16   -0.75   12.90
  -5  -9  16  -12.70   15.54
   5   9 -16    2.84    9.22
  -5   9  16   30.49   15.29
  -5   9  16    9.42   13.85
  -5  -9  15  254.04   18.88
  -5  -9  15  311.08   20.78
  -5   9  15  266.79   19.43
  -5   9  15  262.01   19.23
  -5  -9  14    4.04   14.45
   5   9 -14  -16.89   14.55
  -5   9  14    5.48   14.00
  -5   9  14    8.67   13.40
   5  -9 -13  119.87   15.39
  -5  -9  13  114.79   13.60
   5   9 -13  100.49   14.65
  -5   9  13  102.78   15.59
  -5   9  13  106.62   15.10
   5  -9 -12   28.95   12.85
  -5  -9  12   55.10   12.41
   5   9 -12   71.09   15.89
  -5   9  12   46.88   11.96
  -5   9  12   27.35   14.30
   5  -9 -11   65.61   14.05
  -5  -9  11   61.13   11.91
   5   9 -11   41.90   13.70
  -5   9  11   60.13   14.25
  -5   9  11   48.33   12.50
   5  -9 -10  217.77   17.04
  -5  -9  10  236.95   16.29
   5   9 -10  217.52   17.59
  -5   9  10  204.36   16.09
  -5   9  10  230.37   18.23
   5  -9  -9   28.65   12.95
  -5  -9   9   10.91   10.56
   5   9  -9   10.91   11.01
  -5   9   9   -1.69   11.36
  -5   9   9   -2.29   12.85
   5  -9  -8  103.33   14.25
  -5  -9   8  141.04   13.60
   5   9  -8   66.26   10.66
  -5   9   8   95.85   12.60
  -5   9   8  105.72   13.80
   5  -9  -7  225.79   16.99
  -5  -9   7  179.40   14.60
   5   9  -7  154.00   13.40
  -5   9   7  154.94   14.55
  -5   9   7  185.78   15.49
   5  -9  -6  152.75   13.65
  -5  -9   6  143.13   14.55
   5   9  -6  105.12   12.46
  -5   9   6  119.12   13.80
  -5   9   6  137.95   14.25
   5  -9  -5  425.27   22.32
  -5  -9   5  459.50   24.66
   5   9  -5  433.24   23.71
  -5   9   5  411.82   22.27
  -5   9   5  469.61   24.71
   5  -9  -4   -3.74   10.56
  -5  -9   4   15.44   13.35
   5   9  -4   -8.67   11.51
  -5   9   4    1.94   10.56
  -5   9   4    4.93   10.86
   5  -9  -3  538.06   27.00
  -5  -9   3  561.48   28.80
   5   9  -3  509.67   26.70
  -5   9   3  534.58   26.65
  -5   9   3  471.00   24.31
  -5  -9   2  212.83   17.39
   5   9  -2  226.38   16.94
  -5   9   2  205.26   14.65
  -5   9   2  213.38   15.00
  -5  -9   1   89.08   13.15
   5   9  -1   94.36   14.00
  -5   9   1   88.13   10.96
  -5   9   1   98.94   11.11
  -5  -9   0  215.92   16.84
   5   9   0  167.30   16.09
  -5   9   0  219.16   15.05
  -5   9   0  189.52   13.60
  -5  -9  -1   43.44   13.20
   5   9   1   15.49   12.50
  -5   9  -1   11.66    8.52
  -5   9  -1   19.53    8.57
  -5  -9  -2  359.85   23.17
   5   9   2  302.16   19.93
   5   9   2  317.76   21.12
  -5   9  -2  300.02   15.84
  -5   9  -2  327.42   16.94
  -5  -9  -3  171.63   17.69
   5   9   3  181.80   16.34
   5   9   3  238.19   17.79
  -5  -9  -4   99.69   15.74
   5   9   4  105.42   14.70
   5   9   4   90.03   14.50
  -5  -9  -5  613.29   31.98
   5   9   5  628.74   31.49
   5   9   5  646.17   32.68
  -5  -9  -6    1.30   14.85
   5   9   6    6.33   13.60
   5   9   6  -10.91   13.30
  -5  -9  -7  330.11   19.98
   5   9   7  353.03   21.42
   5   9   7  326.87   20.87
  -5  -9  -8   15.29   11.96
   5   9   8   -1.64   12.06
   5   9   8   31.29   13.00
  -5  -9  -9   59.44   13.40
   5   9   9   80.76   14.50
   5   9   9   77.77   14.95
  -5  -9 -10   72.44   14.55
   5   9  10   85.89   14.35
   5   9  10   69.25   14.00
  -5  -9 -11   21.67   14.10
   5   9  11   -2.44   13.35
   5   9  11   34.87   13.50
   5   9  12   93.51   15.84
   5   9  12   83.35   15.64
   5   9  14    2.39   14.35
   5   9  14  -12.26   13.75
   5   9  15   88.03   13.80
   5   9  15  113.94   18.04
  -5  10  15   10.41   12.95
  -5  10  15    3.84   13.25
  -5  10  14  179.35   17.79
  -5  10  14  173.18   18.88
  -5 -10  13   27.10   10.11
   5  10 -13   25.31    9.52
  -5  10  13   16.99   13.90
  -5  10  13   56.05   16.49
  -5 -10  12   46.58   15.64
   5  10 -12   48.18   14.85
  -5  10  12   64.87   15.84
  -5  10  12   87.68   14.50
  -5 -10  11  159.28   18.18
   5  10 -11  138.25   16.19
  -5  10  11  184.98   17.99
  -5  10  11  183.54   16.69
  -5 -10  10   -4.98   14.65
   5  10 -10  -16.59   15.94
  -5  10  10   32.98   14.75
  -5  10  10   -0.25   13.15
  -5 -10   9  116.58   14.85
   5  10  -9   96.30   17.29
  -5  10   9  145.33   16.29
  -5  10   9  115.04   14.50
  -5 -10   8   56.90   13.50
   5  10  -8   51.32   13.15
  -5  10   8   74.88   14.35
  -5  10   8   94.06   12.70
  -5 -10   7   48.87   13.65
   5  10  -7   36.82   12.75
  -5  10   7   -7.32   12.75
  -5  10   7   33.53   12.06
  -5 -10   6  356.52   22.27
   5  10  -6  307.84   20.23
  -5  10   6  346.70   21.12
  -5  10   6  303.41   19.18
  -5 -10   5  -11.71   12.70
   5  10  -5    6.63   11.96
  -5  10   5    4.93   12.50
  -5  10   5   -7.32   11.01
  -5 -10   4  380.38   22.52
   5  10  -4  437.52   24.51
  -5  10   4  362.74   20.53
  -5  10   4  377.79   21.82
  -5 -10   3   28.70   13.25
   5  10  -3   25.91   12.95
  -5  10   3   52.71   11.71
  -5  10   3   49.92   12.11
  -5 -10   2  360.65   22.62
   5  10  -2  322.39   20.18
  -5  10   2  289.86   18.13
  -5  10   2  316.11   19.23
  -5 -10   1   54.80   14.75
   5  10  -1   63.37   13.70
   5  10  -1   52.01   12.90
  -5  10   1   32.38   11.16
  -5  10   1   65.36   11.41
  -5 -10   0   11.31   14.05
   5  10   0   14.70   13.05
   5  10   0   34.53   11.86
  -5  10   0   13.00   10.31
  -5  10   0   18.13    9.62
  -5 -10  -1  532.58   28.35
   5  10   1  477.73   26.55
   5  10   1  475.54   25.91
  -5  10  -1  537.07   26.65
  -5  10  -1  456.16   23.32
  -5 -10  -2   50.07   14.85
   5  10   2   71.44   14.25
   5  10   2   73.44   13.40
  -5  10  -2   84.65    9.62
  -5  10  -2   75.08    8.97
  -5 -10  -3   26.21   13.25
   5  10   3   55.80   14.80
   5  10   3   24.51   12.46
  -5 -10  -4  341.97   22.57
   5  10   4  361.65   22.12
   5  10   4  301.86   20.08
  -5 -10  -5   -8.02   14.60
   5  10   5   13.60   12.06
   5  10   5  -16.64   12.70
  -5 -10  -6  263.25   19.78
   5  10   6  236.65   18.38
   5  10   6  264.90   19.58
  -5 -10  -7    6.68   15.25
   5  10   7   20.97   13.40
   5  10   7   -6.03   13.05
  -5 -10  -8  131.08   15.94
   5  10   8  148.71   17.09
   5  10   8  139.50   15.00
  -5 -10  -9   12.16   13.70
   5  10   9   35.02   14.05
   5  10   9    6.38   13.85
  -5 -10 -10   18.73   13.40
   5  10  10   54.35   14.75
   5  10  10   47.68   15.29
   5  10  11   33.48   13.30
   5  10  11   44.69   14.65
   5  10  12    9.91   14.15
   5  10  12  -17.09   14.70
   5  10  13   26.80   14.40
   5  10  13   40.75   14.75
  -5  11  13   21.32   17.19
  -5  11  12   57.69   16.94
  -5  11  12   47.68   15.49
  -5 -11  11    8.47   10.81
   5  11 -11   37.56    8.77
   5  11 -11   10.81    9.62
  -5  11  11   24.31   13.95
  -5  11  11   48.53   16.74
  -5 -11  10   19.13   18.73
   5  11 -10   47.73   16.09
   5  11 -10   44.59   16.34
  -5  11  10   39.71   15.69
  -5  11  10   46.03   14.05
  -5 -11   9   31.39   17.59
   5  11  -9   29.05   17.04
   5  11  -9   21.52   14.65
  -5  11   9   22.92   14.05
  -5  11   9   50.02   15.29
  -5 -11   8   11.66   17.59
   5  11  -8   60.83   18.88
  -5  11   8   42.95   13.60
  -5  11   8   26.75   13.10
  -5 -11   7  174.22   21.32
   5  11  -7  168.99   18.33
   5  11  -7  183.64   19.33
  -5  11   7  195.10   18.04
  -5  11   7  177.86   17.49
  -5 -11   6   52.96   18.68
   5  11  -6  -13.25   15.79
   5  11  -6   22.72   15.94
  -5  11   6    1.49   13.35
  -5  11   6  -13.15   12.26
  -5 -11   5  311.83   22.67
   5  11  -5  368.97   23.66
  -5  11   5  339.03   20.97
  -5 -11   4   19.03   14.80
   5  11  -4  -12.70   14.25
   5  11  -4   10.16   14.05
  -5  11   4    1.05   12.75
  -5  11   4   -1.00   13.10
  -5 -11   3  191.46   19.03
   5  11  -3  200.63   18.08
   5  11  -3  227.23   18.88
  -5  11   3  201.18   16.44
  -5  11   3  221.50   16.74
  -5 -11   2   -5.18   14.75
   5  11  -2    4.14   13.45
   5  11  -2  -12.16   14.55
  -5  11   2   11.96   12.65
  -5  11   2   15.15   12.55
  -5 -11   1   43.24   15.44
   5  11  -1   36.42   13.70
   5  11  -1   67.11   14.15
  -5  11   1   51.61   14.25
  -5  11   1   28.80   12.41
  -5 -11   0   21.97   14.80
   5  11   0   37.76   14.20
   5  11   0   34.72   13.30
  -5  11   0   26.36   13.45
  -5  11   0   48.38   12.90
  -5 -11  -1  -11.91   14.90
   5  11   1   -2.59   12.36
   5  11   1   -7.47   12.46
  -5  11  -1   -1.49   11.91
  -5  11  -1  -11.21   11.71
  -5 -11  -2   65.02   15.20
   5  11   2   49.72   15.34
   5  11   2   83.70   15.20
  -5 -11  -3   49.92   15.20
   5  11   3   71.54   14.50
   5  11   3   51.81   14.00
  -5 -11  -4   41.25   14.10
   5  11   4   16.69   15.00
   5  11   4  -13.35   14.10
  -5 -11  -5  182.34   17.09
   5  11   5  232.46   19.78
   5  11   5  258.47   19.48
  -5 -11  -6  -12.65   14.90
   5  11   6   11.81   15.69
   5  11   6   -4.33   13.85
  -5 -11  -7  159.38   17.74
   5  11   7  168.94   17.24
   5  11   7  199.88   18.43
  -5 -11  -8  -22.67   14.60
   5  11   8    4.53   15.00
   5  11   8   -2.49   14.60
   5  11   9  106.07   17.24
   5  11   9  115.24   16.94
   5  11  10   53.76   15.44
   5  11  10   19.73   14.50
   5  11  11   35.97   15.00
   5  11  11    9.62   15.15
  -5  12  10    0.30   16.39
  -5  12  10    9.12   16.39
   5  12  -9    6.93   11.76
   5  12  -9   10.21   11.76
  -5  12   9   20.73   14.65
  -5  12   9   -5.48   15.79
  -5 -12   8    2.29   21.17
   5  12  -8   36.72   17.34
   5  12  -8   45.74   14.75
  -5  12   8   45.98   16.54
  -5  12   8   48.92   16.19
  -5 -12   7    3.44   20.63
   5  12  -7    6.13   16.89
   5  12  -7   18.68   18.88
  -5  12   7   -3.04   15.10
  -5  12   7  -12.95   15.59
  -5 -12   6  102.98   23.07
   5  12  -6  129.43   20.58
   5  12  -6   64.12   21.02
  -5  12   6  101.93   15.99
  -5  12   6  116.88   17.19
  -5 -12   5   -3.09   18.78
   5  12  -5   24.61   19.48
   5  12  -5   -9.52   19.43
  -5  12   5   -7.17   15.49
  -5  12   5  -21.12   14.65
  -5 -12   4  164.76   21.42
   5  12  -4  166.15   21.32
   5  12  -4  228.93   23.32
  -5  12   4  167.80   17.84
  -5 -12   3  -17.44   18.38
   5  12  -3   -7.57   17.99
   5  12  -3   15.54   17.74
  -5  12   3   25.76   17.34
  -5  12   3  -15.84   15.89
  -5 -12   2   55.05   18.08
   5  12  -2   37.96   17.29
   5  12  -2   79.61   18.13
  -5  12   2  111.60   18.28
  -5  12   2   69.75   15.15
  -5 -12   1    8.57   17.84
   5  12  -1   14.60   15.94
   5  12  -1    9.37   15.94
  -5  12   1   -2.29   14.85
  -5  12   1   13.05   14.05
  -5 -12   0   16.24   16.84
   5  12   0    3.69   16.64
   5  12   0   15.34   15.79
  -5  12   0   17.14   14.40
  -5  12   0   10.86   14.75
  -5 -12  -1   45.04   17.39
   5  12   1   27.15   16.84
   5  12   1   54.35   16.69
  -5  12  -1   32.83   13.15
  -5  12  -1   20.73   12.85
  -5 -12  -2   -8.17   16.99
   5  12   2   -8.32   14.15
   5  12   2    9.47   15.20
  -5 -12  -3   11.41   16.29
   5  12   3   22.72   16.64
   5  12   3   13.70   14.25
  -5 -12  -4   81.71   16.94
   5  12   4   72.44   16.64
   5  12   4   89.68   15.34
  -5 -12  -5   -8.77   15.05
   5  12   5   18.28   14.55
   5  12   5    3.79   15.89
   5  12   6  118.03   16.49
   5  12   6  113.14   18.08
   5  12   7    1.59   16.69
   5  12   7   -3.94   15.10
   5  12   8   76.82   16.74
   5  12   8   37.27   18.04
   5  13  -4  -18.04   20.97
   5  13  -4   11.91   19.88
  -5  13   4   19.43   18.13
  -5  13   4   16.94   17.09
   5  13  -3   24.61   19.28
   5  13  -3   23.76   17.79
  -5  13   3   -3.29   16.19
  -5  13   3   35.97   18.58
   5  13  -2   36.22   20.38
   5  13  -2   -2.34   22.72
  -5  13   2   13.95   19.28
  -5  13   2    0.60   22.67
   5  13  -1   26.21   19.68
   5  13  -1   13.50   18.83
  -5  13   1   14.00   17.79
  -5  13   1    5.03   17.49
   5  13   0   19.98   20.18
   5  13   0  -15.59   19.48
  -5  13   0    5.48   12.80
  -5  13   0   15.79   13.30
   5  13   1    9.67   20.13
   5  13   1   -1.54   19.58
   5  13   2   20.13   19.88
   5  13   2   16.29   18.38
   5  13   3    6.97   18.43
   5  13   3   -2.54   20.23
   6   0 -22  397.92   23.02
  -6   0  22  474.09   24.81
  -6   0  22  449.88   23.76
   6   0 -21   -7.72   11.31
  -6   0  21   -0.20   11.26
  -6   0  21   -7.37   10.51
   6   0 -20  629.73   30.69
  -6   0  20  645.18   30.94
  -6   0  20  656.14   31.89
   6   0 -19    2.04   10.86
  -6   0  19    2.24   10.46
  -6   0  19    7.27    8.57
   6   0 -18  878.34   40.06
  -6   0  18  825.03   38.31
   6   0 -17    7.22    9.76
  -6   0  17  -16.04    8.87
   6   0 -16   66.21   10.36
  -6   0  16   71.44   10.56
   6   0 -15    0.70    9.12
  -6   0  15    1.15    8.87
   6   0 -14  841.97   38.81
  -6   0  14  755.28   35.37
   6   0 -13   -7.22    9.91
  -6   0  13   -4.83    9.17
   6   0 -12 1686.93   73.39
  -6   0  12 1718.31   74.43
   6   0 -11   12.16   10.11
  -6   0  11    2.94    8.47
   6   0 -10 1868.77   80.41
  -6   0  10 2097.95   89.98
   6   0  -9   -4.53    8.02
  -6   0   9   -5.03    8.07
   6   0  -8 3261.26  137.70
  -6   0   8 3382.32  142.74
   6   0  -7   11.41    7.72
  -6   0   7   18.28    8.22
   6   0  -6   17.69    7.77
  -6   0   6   33.08    8.42
   6   0  -5    2.64    7.22
  -6   0   5    2.84    7.87
   6   0  -4  752.29   34.53
  -6   0   4  760.76   35.02
   6   0  -3   10.31    8.37
  -6   0   3    2.19    8.62
   6   0  -2 1648.07   70.99
  -6   0   2 1706.36   73.39
   6   0  -1    1.89    7.67
  -6   0   1    2.94    7.42
   6   0   0 1782.58   76.62
  -6   0   0 1808.49   77.52
   6   0   1   -9.27    8.22
  -6   0  -1  -13.65    7.57
   6   0   2 3484.45  146.47
  -6   0  -2 3684.73  154.89
   6   0   3  -10.16    6.88
  -6   0  -3    8.87    8.82
   6   0   4 1326.72   57.69
  -6   0  -4 1356.62   59.19
   6   0   5  -10.96    7.67
  -6   0  -5   16.54    8.22
   6   0   6  317.31   17.69
  -6   0  -6  298.43   17.69
   6   0   7   -4.14    8.02
  -6   0  -7    5.78    9.12
   6   0   8  520.63   25.01
  -6   0  -8  475.09   24.41
   6   0   9    3.59    8.22
  -6   0  -9   -6.97    8.67
   6   0  10 1534.48   67.11
   6   0  10 1480.17   63.97
  -6   0 -10 1540.95   67.06
   6   0  11  -13.15    8.82
   6   0  11  -12.06    8.92
  -6   0 -11   -0.30   10.26
   6   0  12 1799.02   77.47
   6   0  12 1780.09   76.42
  -6   0 -12 1708.35   73.93
   6   0  13  -10.06    9.76
   6   0  13    6.88   10.06
  -6   0 -13   -1.79   11.11
   6   0  14  598.35   29.34
   6   0  14  604.32   29.99
  -6   0 -14  589.38   29.39
   6   0  15    1.10   11.01
   6   0  15  -26.06    9.42
   6   0  16   54.35   11.56
   6   0  16   41.35   11.86
   6   0  17    6.13   10.46
   6   0  17   14.05   12.21
   6   0  18   25.51   13.45
   6   0  18   22.57   12.41
   6   0  19  -22.97   12.46
   6   0  19    6.58   12.80
   6   0  20   88.68   15.20
   6   0  20   90.03   14.80
   6  -1 -22    5.23   13.40
  -6  -1  22   23.61   12.36
  -6  -1  22    4.18   12.50
   6   1 -22    0.15   12.80
  -6   1  22    8.87   11.81
  -6   1  22   23.61   12.60
   6  -1 -21  477.58   24.86
  -6  -1  21  509.17   26.50
  -6  -1  21  479.12   24.96
   6   1 -21  435.38   23.37
  -6   1  21  454.51   24.31
  -6   1  21  497.26   25.56
   6  -1 -20  -14.85   11.66
  -6  -1  20  -10.61   10.31
  -6  -1  20   -7.17   10.91
   6   1 -20   12.65   11.61
  -6   1  20    2.04    9.02
  -6   1  20    1.15   10.96
   6  -1 -19  647.67   31.24
  -6  -1  19  658.63   31.04
  -6  -1  19  731.86   34.28
   6   1 -19  662.12   31.59
  -6   1  19  654.14   31.84
  -6   1  19  637.21   31.09
   6  -1 -18   -1.30   10.06
  -6  -1  18    4.68   10.16
   6   1 -18   34.97   10.06
  -6   1  18   33.88   10.61
  -6   1  18    6.38    9.57
   6  -1 -17   94.61   11.96
  -6  -1  17   81.01   11.31
   6   1 -17   89.33   11.41
  -6   1  17   55.55   11.71
   6  -1 -16   21.42   11.26
  -6  -1  16    3.29    9.22
   6   1 -16   -4.63    8.97
  -6   1  16   -5.73   10.26
   6  -1 -15   23.91   10.66
  -6  -1  15   -2.29    8.32
   6   1 -15    8.67    8.02
  -6   1  15    4.43    9.67
   6  -1 -14  202.72   15.64
  -6  -1  14  238.74   15.15
   6   1 -14  222.15   15.10
  -6   1  14  172.93   14.30
   6  -1 -13  350.49   19.38
  -6  -1  13  343.76   18.83
   6   1 -13  408.53   21.32
  -6   1  13  409.92   22.42
   6  -1 -12   -1.39   10.31
  -6  -1  12   -4.09    8.32
   6   1 -12   13.55    9.67
  -6   1  12   -7.67    9.17
   6  -1 -11 2140.79   92.12
  -6  -1  11 2131.33   91.02
   6   1 -11 2128.34   91.32
  -6   1  11 2147.77   92.37
   6  -1 -10   82.45   10.36
  -6  -1  10   98.55   10.26
   6   1 -10   86.84    9.91
  -6   1  10   81.31   10.01
   6  -1  -9 2848.74  120.91
  -6  -1   9 2734.16  115.83
   6   1  -9 2711.24  115.19
  -6   1   9 2745.61  116.63
   6  -1  -8   19.48    9.47
  -6  -1   8    3.14    7.87
   6   1  -8    5.68    8.22
  -6   1   8    4.48    8.57
   6  -1  -7  578.42   28.25
  -6  -1   7  627.74   29.84
   6   1  -7  558.49   27.05
  -6   1   7  526.11   25.96
   6  -1  -6    4.33    9.02
  -6  -1   6    4.98    8.37
   6   1  -6   17.69    8.27
  -6   1   6    2.44    8.27
   6  -1  -5   11.71    8.52
  -6  -1   5    6.93    8.52
   6   1  -5    0.00    7.77
  -6   1   5    5.48    7.32
   6  -1  -4   10.11    7.82
  -6  -1   4   -3.79    7.42
   6   1  -4   10.46    7.07
  -6   1   4    2.24    6.97
   6  -1  -3  444.00   22.32
  -6  -1   3  478.88   23.57
   6   1  -3  467.32   23.32
  -6   1   3  452.52   22.72
   6  -1  -2   20.18    7.27
  -6  -1   2   10.11    8.27
   6   1  -2    4.83    7.97
  -6   1   2   19.48    8.57
   6  -1  -1 1953.47   83.60
  -6  -1   1 1837.38   78.77
   6   1  -1 1902.15   81.71
  -6   1   1 1897.67   81.21
   6  -1   0   16.74    7.42
  -6  -1   0   18.23    8.32
   6   1   0   14.25    8.32
  -6   1   0   15.39    7.92
   6  -1   1 4185.43  175.02
  -6  -1  -1 4027.00  168.89
   6   1   1 3945.30  165.16
  -6   1  -1 4171.48  174.57
   6  -1   2   58.04    8.67
  -6  -1  -2   56.45    9.72
   6   1   2   36.07    8.42
  -6   1  -2   61.48    8.82
   6  -1   3 2108.91   89.73
  -6  -1  -3 1943.50   83.35
   6   1   3 1987.84   84.99
  -6   1  -3 2146.77   91.32
   6  -1   4   -3.54    7.17
  -6  -1  -4   12.65    9.42
   6   1   4   -2.34    7.27
  -6   1  -4   -7.37    8.47
   6  -1   5 1145.38   50.07
  -6  -1  -5 1109.51   49.47
   6   1   5 1079.61   47.93
  -6   1  -5 1112.00   49.22
   6  -1   6   34.72    7.12
  -6  -1  -6   29.74   10.31
   6   1   6   26.95    9.72
  -6   1  -6   46.18    9.47
   6  -1   7   36.92    7.87
  -6  -1  -7   21.57   10.36
   6   1   7   35.57    9.52
  -6   1  -7   34.82    9.27
   6  -1   8   -7.27    7.87
  -6  -1  -8    2.19    8.97
   6   1   8    8.22    9.12
  -6   1  -8   -7.92   10.16
   6  -1   9  901.75   40.75
  -6  -1  -9  937.62   42.65
   6   1   9  860.40   39.16
  -6   1  -9  885.81   40.11
   6  -1  10   12.36    7.82
   6  -1  10   -1.99    8.37
   6   1  10   46.93    9.57
   6   1  10   23.71    8.62
  -6   1 -10    6.88    9.07
   6  -1  11 2287.27   97.20
   6  -1  11 2443.70  103.63
  -6  -1 -11 2518.43  107.66
   6   1  11 2362.99  100.94
   6   1  11 2275.31   97.30
  -6   1 -11 2426.76  103.28
   6  -1  12    6.23    9.47
   6  -1  12    8.12    9.47
  -6  -1 -12   39.61   11.06
   6   1  12   32.38   11.16
  -6   1 -12    6.68   10.21
   6  -1  13  870.86   40.01
   6  -1  13  872.86   40.16
   6   1  13  876.34   40.45
   6   1  13  916.70   41.80
  -6   1 -13  803.11   37.86
   6  -1  14   24.71    9.02
   6  -1  14   27.30   11.36
  -6  -1 -14   14.20   12.06
   6   1  14    2.14   11.31
   6   1  14   20.48    9.02
  -6   1 -14    4.48   10.26
   6  -1  15  437.08   23.32
   6  -1  15  382.82   20.87
  -6  -1 -15  450.48   23.96
   6   1  15  404.59   23.07
   6   1  15  431.05   23.52
   6  -1  16    5.73   10.16
   6  -1  16   22.62   10.36
   6   1  16   12.90   10.01
   6   1  16   17.54   11.06
   6  -1  17   -2.59   10.71
   6  -1  17   -9.47   11.51
   6   1  17   21.32   11.71
   6   1  17    3.39   10.56
   6  -1  18   19.03   12.16
   6  -1  18   12.46   13.60
   6   1  18    9.47   12.16
   6   1  18   16.29   10.36
   6  -1  19  130.93   15.49
   6  -1  19  108.31   16.69
   6   1  19  115.83   14.55
   6   1  19  126.30   14.95
   6  -1  20    0.05   15.00
   6  -1  20   -6.38   13.90
   6   1  20    3.99   15.15
   6   1  20    4.04   12.21
   6  -2 -22  290.60   19.03
  -6  -2  22  315.31   20.83
  -6  -2  22  331.31   20.13
   6   2 -22  331.86   21.27
  -6   2  22  333.25   20.53
  -6   2  22  296.68   19.68
   6  -2 -21    2.89   13.05
  -6  -2  21   24.41   12.75
  -6  -2  21   15.84   11.31
   6   2 -21  -17.54   12.41
  -6   2  21  -11.66   13.40
  -6   2  21    5.33   12.11
   6  -2 -20  323.78   20.48
  -6  -2  20  319.50   18.88
  -6  -2  20  342.12   19.33
   6   2 -20  340.13   20.43
  -6   2  20  320.75   20.53
  -6   2  20  306.60   19.03
   6  -2 -19    6.53   10.96
  -6  -2  19   13.25   10.31
   6   2 -19    6.97   10.31
  -6   2  19    1.25   11.16
  -6   2  19   -5.58   11.76
   6  -2 -18  450.03   24.56
  -6  -2  18  463.13   24.26
   6   2 -18  389.80   21.37
  -6   2  18  464.33   25.11
  -6   2  18  459.65   24.61
   6  -2 -17   14.95   11.21
  -6  -2  17    4.88    9.52
   6   2 -17   10.96    9.12
  -6   2  17   11.41    9.76
  -6   2  17   15.44   10.81
   6  -2 -16   77.27   11.81
  -6  -2  16   61.63   10.26
   6   2 -16   57.79   10.41
  -6   2  16   59.69   11.61
   6  -2 -15    2.39   10.56
  -6  -2  15   18.93    8.42
   6   2 -15    5.63    8.57
  -6   2  15   -8.42    9.96
   6  -2 -14   68.65   11.91
  -6  -2  14   56.94    9.47
   6   2 -14   56.60    9.91
  -6   2  14   71.64   11.46
   6  -2 -13    3.79    9.47
  -6  -2  13   -4.68    7.72
   6   2 -13   10.06    8.52
  -6   2  13   -4.83    9.67
   6  -2 -12  977.98   44.29
  -6  -2  12 1010.86   45.19
   6   2 -12  959.55   43.00
  -6   2  12 1053.71   47.68
   6  -2 -11   -3.39    9.96
  -6  -2  11    5.48    8.37
   6   2 -11   -1.05    9.12
  -6   2  11   -0.50    9.47
   6  -2 -10 1524.51   67.01
  -6  -2  10 1398.96   61.33
   6   2 -10 1441.81   63.12
  -6   2  10 1504.08   66.11
   6  -2  -9   23.27   10.31
  -6  -2   9   37.47    8.77
   6   2  -9   18.23    8.72
  -6   2   9   20.33    9.27
   6  -2  -8 1746.21   75.33
  -6  -2   8 1792.55   77.27
   6   2  -8 1753.69   75.58
  -6   2   8 1795.54   77.57
   6  -2  -7   -1.79    8.72
  -6  -2   7   15.94    8.32
   6   2  -7    7.32    7.72
  -6   2   7   -9.67    7.62
   6  -2  -6 1474.69   64.12
  -6  -2   6 1451.77   63.12
   6   2  -6 1463.23   63.42
  -6   2   6 1442.31   62.87
   6  -2  -5    3.94    7.47
  -6  -2   5    5.48    8.47
   6   2  -5    5.73    8.02
  -6   2   5   14.45    8.37
   6  -2  -4    8.67    7.97
  -6  -2   4   11.96    8.12
   6   2  -4    7.67    7.27
  -6   2   4    7.17    7.92
   6  -2  -3   85.94    8.82
  -6  -2   3  115.33   11.31
   6   2  -3   96.00    9.72
  -6   2   3   97.55   10.16
   6  -2  -2 2503.98  105.82
  -6  -2   2 2567.76  108.86
   6   2  -2 2249.40   95.61
  -6   2   2 2507.47  106.27
   6  -2  -1  167.10   11.26
  -6  -2   1  161.72   12.26
   6   2  -1  181.20   12.46
  -6   2   1  164.56   11.76
   6  -2   0 2561.28  108.21
  -6  -2   0 2539.36  107.96
   6   2   0 2332.10   99.14
  -6   2   0 2555.30  108.06
   6  -2   1   18.68    7.12
  -6  -2  -1   29.29    8.87
   6   2   1   36.12    9.52
  -6   2  -1   19.48    7.92
   6  -2   2 2198.58   93.36
  -6  -2  -2 2199.58   93.81
   6   2   2 2100.94   89.73
  -6   2  -2 2183.64   92.47
   6  -2   3   49.07    7.47
  -6  -2  -3   42.25    9.86
   6   2   3   29.64    9.17
  -6   2  -3   42.95    8.42
   6  -2   4  600.34   27.55
  -6  -2  -4  604.82   29.19
   6   2   4  570.45   28.20
  -6   2  -4  580.41   27.30
   6  -2   5   41.60    7.32
  -6  -2  -5   51.86    9.96
   6   2   5   20.18    9.52
  -6   2  -5   46.38    8.97
   6  -2   6   75.18    8.07
  -6  -2  -6   70.35   11.91
   6  -2   7   21.42    7.62
  -6  -2  -7   16.19    9.81
   6   2   7    7.87    9.02
  -6   2  -7   29.00    9.32
   6  -2   8  409.82   20.08
  -6  -2  -8  437.52   24.01
   6   2   8  452.12   24.01
  -6   2  -8  465.13   23.17
   6   2   9   71.14   11.56
  -6   2  -9   72.89    9.96
   6  -2  10 1616.68   69.35
   6  -2  10 1567.86   67.41
  -6  -2 -10 1564.87   68.70
   6   2  10 1509.07   66.21
   6   2  10 1617.68   70.60
  -6   2 -10 1645.08   70.80
   6  -2  11    7.77    9.17
   6  -2  11    7.22    8.22
  -6  -2 -11   -3.29   11.06
   6   2  11  -17.09   10.01
   6   2  11  -13.25   10.31
  -6   2 -11    6.03    9.52
   6  -2  12 1245.52   54.60
   6  -2  12 1214.63   53.16
  -6  -2 -12 1244.52   55.50
   6   2  12 1209.64   54.11
   6   2  12 1210.14   53.56
  -6   2 -12 1232.06   54.11
   6  -2  13   15.84    9.22
   6  -2  13   25.11   10.36
  -6  -2 -13   27.05   11.61
   6   2  13    9.62   11.01
   6   2  13    0.85   11.06
   6  -2  14  469.56   23.91
   6  -2  14  485.40   24.66
  -6  -2 -14  448.49   24.56
   6   2  14  486.25   25.86
   6   2  14  511.66   26.55
   6  -2  15   -1.49    9.42
   6  -2  15   -5.18   10.41
  -6  -2 -15   11.81   11.16
   6   2  15   -3.74    9.86
   6   2  15   -0.60    9.62
   6  -2  16  140.59   13.75
   6  -2  16  152.30   12.75
   6   2  16  120.57   12.75
   6   2  16  109.75   12.26
   6  -2  17   -8.67   11.21
   6  -2  17   10.41   12.70
   6   2  17   17.89    9.72
   6   2  17   14.90   11.36
   6  -2  18   32.88   12.06
   6  -2  18   17.94   14.15
   6   2  18   17.04   11.46
   6   2  18   -3.99   12.50
   6  -2  19  -15.69   13.65
   6  -2  19   -3.59   14.05
   6   2  19   -3.04   12.55
   6   2  19   18.04   13.05
   6  -2  20  224.09   20.13
   6  -2  20  204.56   20.28
   6   2  20  221.50   17.34
   6   2  20  212.19   17.09
   6  -3 -22   -7.02   15.39
  -6  -3  22   14.95   12.90
   6   3 -22   -2.69   15.49
  -6   3  22    4.23   13.65
   6  -3 -21  351.14   21.67
  -6  -3  21  355.12   20.97
  -6  -3  21  386.41   22.42
   6   3 -21  349.09   21.67
  -6   3  21  342.87   20.38
  -6   3  21  312.33   20.28
   6  -3 -20  -14.65   12.85
  -6  -3  20    0.00   10.11
  -6  -3  20   -6.58   11.31
   6   3 -20   -4.18   11.56
  -6   3  20   -9.72   11.56
  -6   3  20   18.78   12.50
   6  -3 -19  511.66   27.05
  -6  -3  19  498.21   25.51
   6   3 -19  544.54   26.70
  -6   3  19  545.54   27.75
  -6   3  19  521.12   26.85
   6  -3 -18   19.53   10.51
  -6  -3  18   23.52    9.47
   6   3 -18   21.67    9.52
  -6   3  18    8.77   10.06
  -6   3  18   13.40   10.21
   6  -3 -17  284.18   19.33
  -6  -3  17  257.87   15.74
   6   3 -17  260.26   15.99
  -6   3  17  266.04   17.69
  -6   3  17  271.27   17.54
   6  -3 -16   24.46   11.86
  -6  -3  16   15.54    8.32
   6   3 -16   29.10    9.57
  -6   3  16   19.73    9.91
  -6   3  16   -8.37    9.72
   6  -3 -15   22.97   11.81
  -6  -3  15   18.73    8.57
   6   3 -15   31.39    9.72
  -6   3  15   -5.58   11.21
   6  -3 -14   18.78    9.52
  -6  -3  14   10.81    7.87
   6   3 -14    8.22    8.47
  -6   3  14   40.75   11.81
   6  -3 -13  175.82   14.75
  -6  -3  13  159.33   11.91
   6   3 -13  194.20   13.25
  -6   3  13  187.67   15.44
   6  -3 -12   18.73   10.31
  -6  -3  12   21.52    7.42
   6   3 -12   26.31    7.97
  -6   3  12   11.66    9.17
   6  -3 -11 1040.25   47.28
  -6  -3  11 1110.50   48.92
   6   3 -11 1198.68   52.91
  -6   3  11 1106.52   49.72
   6  -3 -10   -8.02    8.42
  -6  -3  10    8.37    7.27
   6   3 -10   16.39    8.32
  -6   3  10    9.72    8.37
   6  -3  -9 2224.49   95.26
  -6  -3   9 2268.33   96.40
   6   3  -9 2304.70   98.25
  -6   3   9 2239.94   96.10
   6  -3  -8    6.13   10.16
  -6  -3   8   -5.48    7.57
   6   3  -8   10.06    7.82
  -6   3   8    7.87    9.12
   6  -3  -7 1106.02   49.42
  -6  -3   7 1137.90   50.12
   6   3  -7 1110.50   49.07
  -6   3   7 1135.91   50.67
   6  -3  -6  111.10   11.11
  -6  -3   6  126.69   10.76
   6   3  -6  109.26   10.31
  -6   3   6  106.67   10.91
   6  -3  -5  493.02   24.51
  -6  -3   5  519.13   25.51
   6   3  -5  493.47   24.31
  -6   3   5  507.17   25.26
   6  -3  -4  116.68   10.81
  -6  -3   4  133.27   10.71
   6   3  -4  102.53    9.96
  -6   3   4  108.41   10.56
   6  -3  -3  518.63   25.26
  -6  -3   3  450.13   22.67
   6   3  -3  491.63   24.31
  -6   3   3  458.65   22.87
   6  -3  -2    5.43    7.27
  -6  -3   2   10.26    8.62
   6   3  -2   18.04    8.92
  -6   3   2    4.58    7.17
   6  -3  -1 1848.35   79.07
  -6  -3   1 1609.21   69.90
   6   3  -1 1806.50   77.82
  -6   3   1 1794.54   76.72
   6  -3   0  128.34   10.06
  -6  -3   0  118.03   12.11
   6   3   0  150.21   12.46
  -6   3   0  128.74   10.36
   6  -3   1 1504.08   64.47
  -6  -3  -1 1492.13   65.17
   6   3   1 1511.06   65.86
  -6   3  -1 1510.56   64.87
   6  -3   2  221.70   12.46
  -6  -3  -2  232.96   15.69
   6   3   2  210.14   14.75
  -6   3  -2  219.86   13.00
   6  -3   3 1088.08   47.13
  -6  -3  -3 1113.99   49.97
   6   3   3 1058.19   47.23
  -6   3  -3 1187.23   51.37
   6  -3   4  102.08    8.37
  -6  -3  -4   93.26   12.36
   6   3   4   84.99    9.67
  -6   3  -4  104.87    9.12
   6  -3   5  110.35    8.87
  -6  -3  -5  116.13   12.31
   6   3   5   81.46   10.26
  -6   3  -5  113.89    9.52
   6  -3   6  362.89   18.18
  -6  -3  -6  368.07   21.52
   6   3   6  369.52   20.92
  -6   3  -6  389.00   19.63
   6  -3   7   18.68    6.03
  -6  -3  -7   -8.27   11.56
   6   3   7   17.94   10.26
  -6   3  -7   29.54    8.62
   6  -3   8  119.77    8.62
  -6  -3  -8  109.26   12.46
   6   3   8  117.13   12.36
  -6   3  -8  116.13   11.11
   6  -3   9  589.38   27.65
   6  -3   9  582.90   27.15
  -6  -3  -9  595.36   30.04
   6   3   9  579.91   28.45
  -6   3  -9  559.98   26.60
   6  -3  10  128.34   11.21
   6  -3  10  120.17   11.01
  -6  -3 -10  131.28   15.25
   6   3  10  132.72   14.45
   6   3  10  104.67   13.10
  -6   3 -10  110.30   10.51
   6  -3  11 1003.89   43.74
   6  -3  11  962.53   42.40
  -6  -3 -11  939.12   43.89
   6   3  11 1038.26   47.78
   6   3  11 1028.30   47.38
  -6   3 -11  982.46   43.69
   6  -3  12   17.69    9.02
   6  -3  12   16.39    9.22
  -6  -3 -12   33.03   13.05
   6   3  12   35.97   12.85
   6   3  12   26.01   11.01
  -6   3 -12   14.45    9.76
   6  -3  13  707.45   32.73
  -6  -3 -13  615.28   31.34
   6   3  13  868.87   41.20
   6   3  13  837.48   38.86
   6  -3  14   54.90    9.86
   6  -3  14   35.82    9.47
  -6  -3 -14   33.53   13.30
   6   3  14   19.13   11.36
   6   3  14   65.36   14.00
   6  -3  15  464.38   23.86
   6  -3  15  488.34   24.61
  -6  -3 -15  508.17   26.70
   6   3  15  480.67   25.26
   6   3  15  407.43   21.97
   6  -3  16   50.12   11.86
   6  -3  16   52.16   12.06
   6   3  16   33.53   12.50
   6   3  16   41.15   11.91
   6  -3  17   12.55   13.40
   6  -3  17    3.09   11.51
   6   3  17   10.71   10.61
   6   3  17   11.91   12.01
   6  -3  18   26.31   13.50
   6  -3  18   31.19   13.95
   6   3  18   18.18   11.76
   6   3  18   26.90   11.81
   6  -3  19  106.37   17.34
   6  -3  19  152.20   20.53
   6   3  19  130.63   15.34
   6   3  19  128.89   13.70
   6  -3  20  -23.12   17.84
   6  -3  20  -22.02   16.89
   6   3  20   -1.99   15.05
   6   3  20   13.55   14.00
   6  -4 -21   -6.13   14.30
  -6  -4  21   -9.67   12.80
  -6  -4  21   -1.39   11.46
   6   4 -21   -1.89   13.25
  -6   4  21   11.91   12.41
  -6   4  21   14.80   12.85
   6  -4 -20  359.01   21.87
  -6  -4  20  357.21   21.37
  -6  -4  20  350.99   21.57
   6   4 -20  321.64   20.28
  -6   4  20  288.06   19.48
  -6   4  20  307.29   19.98
   6  -4 -19   18.88   12.21
  -6  -4  19    0.15   10.41
   6   4 -19   20.48   10.66
  -6   4  19   13.35   11.71
  -6   4  19   14.00   11.06
   6  -4 -18  444.45   24.26
  -6  -4  18  469.06   24.11
   6   4 -18  483.61   24.21
  -6   4  18  465.37   25.06
  -6   4  18  444.90   23.42
   6  -4 -17    7.82   11.76
  -6  -4  17   21.17    8.77
   6   4 -17   -9.52    8.97
  -6   4  17   19.83   10.96
  -6   4  17   -2.84   12.21
   6  -4 -16   19.78   11.81
  -6  -4  16   23.22    8.92
   6   4 -16   25.76    9.32
  -6   4  16   25.51   10.16
  -6   4  16   34.33   12.16
   6  -4 -15   57.49   11.81
  -6  -4  15   81.76    9.96
   6   4 -15   67.31   10.06
  -6   4  15   73.14   11.96
  -6   4  15  111.40   12.60
   6  -4 -14  289.46   18.43
  -6  -4  14  314.37   17.39
   6   4 -14  310.58   17.54
  -6   4  14  350.39   21.07
   6  -4 -13  152.55   13.85
  -6  -4  13  175.07   12.41
   6   4 -13  179.50   13.05
  -6   4  13  174.97   15.54
   6  -4 -12  357.06   19.68
  -6  -4  12  304.30   16.99
   6   4 -12  377.34   19.93
  -6   4  12  381.78   21.42
   6  -4 -11   55.50   10.56
  -6  -4  11   55.20    8.57
   6   4 -11   78.12    9.81
  -6   4  11   43.34   11.76
   6  -4 -10 1624.15   71.19
  -6  -4  10 1646.57   70.99
   6   4 -10 1659.53   71.54
  -6   4  10 1735.25   75.93
   6  -4  -9  330.46   19.48
  -6  -4   9  360.85   18.68
   6   4  -9  328.27   18.13
  -6   4   9  317.21   18.78
   6  -4  -8 1509.57   65.36
  -6  -4   8 1489.64   64.32
   6   4  -8 1611.20   69.60
  -6   4   8 1555.90   67.96
   6  -4  -7  134.17   12.16
  -6  -4   7  144.28   11.01
   6   4  -7  111.45   10.91
  -6   4   7  115.24   11.56
   6  -4  -6  346.45   19.63
  -6  -4   6  354.47   18.68
   6   4  -6  365.19   19.48
  -6   4   6  353.63   19.48
   6  -4  -5   41.95    9.96
  -6  -4   5   17.39    7.92
   6   4  -5   22.47    7.87
  -6   4   5   28.30    8.42
   6  -4  -4    8.27    8.72
  -6  -4   4    4.73    7.57
   6   4  -4   13.20    7.87
  -6   4   4   -0.85    7.47
   6  -4  -3  150.26   11.71
  -6  -4   3  168.00   13.00
   6   4  -3  157.58   12.46
  -6   4   3  139.75   11.21
   6  -4  -2 1503.59   64.47
  -6  -4   2 1379.53   60.23
   6   4  -2 1419.39   61.88
  -6   4   2 1423.38   61.63
   6   4  -1  636.71   29.99
  -6   4   1  662.12   30.59
   6  -4   0 2325.13   98.15
  -6  -4   0 2245.91   96.15
   6   4   0 2287.76   97.55
  -6   4   0 2329.61   98.64
   6  -4   1  436.43   21.02
  -6  -4  -1  395.78   21.97
   6   4   1  386.56   20.73
  -6   4  -1  411.02   20.48
   6  -4   2 1231.07   53.31
  -6  -4  -2 1154.84   51.76
   6   4   2 1255.98   55.45
  -6   4  -2 1214.63   52.36
   6  -4   3  523.12   24.31
  -6  -4  -3  487.64   25.61
   6   4   3  480.52   24.86
  -6   4  -3  517.14   24.16
   6  -4   4  700.98   31.04
  -6  -4  -4  657.13   32.33
   6   4   4  699.48   33.43
  -6   4  -4  691.01   30.99
   6   4   5  126.54   12.11
  -6   4  -5  122.46    9.42
   6  -4   6   -7.82    5.33
  -6  -4  -6    7.47   10.56
   6   4   6   12.55    9.52
  -6   4  -6   13.40    6.88
   6   4   7  176.91   14.15
  -6   4  -7  151.06   10.76
   6  -4   8   80.71    7.67
  -6  -4  -8   56.10   12.26
   6   4   8   64.32   11.36
  -6   4  -8   87.24    9.32
   6  -4   9  192.21   12.11
   6  -4   9  186.33   11.31
  -6  -4  -9  211.29   17.94
   6   4   9  230.22   17.39
   6   4   9  248.65   16.64
  -6   4  -9  217.17   12.95
   6  -4  10 1163.31   50.27
   6  -4  10 1129.93   48.58
  -6  -4 -10 1233.56   55.65
   6   4  10 1103.03   50.27
   6   4  10 1094.56   49.37
  -6   4 -10 1129.43   49.22
   6  -4  11    9.72    7.22
   6  -4  11   17.29    7.52
  -6  -4 -11   15.94   12.70
   6   4  11    7.77   10.36
   6   4  11   17.64   12.46
   6  -4  12 1456.26   62.18
   6  -4  12 1438.32   61.68
  -6  -4 -12 1572.34   69.30
   6  -4  13   12.06    8.82
   6  -4  13   15.39    8.17
  -6  -4 -13    9.42   13.10
   6   4  13   27.70   12.65
   6   4  13   13.25   12.90
   6  -4  14  480.42   23.42
   6  -4  14  496.16   24.46
  -6  -4 -14  525.61   28.35
   6   4  14  532.08   27.45
   6   4  14  526.60   27.95
   6  -4  15   94.36   10.86
   6  -4  15   87.83   10.96
  -6  -4 -15  111.30   14.15
   6   4  15  106.67   13.90
   6   4  15   89.63   13.00
   6  -4  16  111.15   11.71
   6  -4  16  124.00   14.75
   6   4  16  112.05   14.25
   6   4  16  125.75   14.65
   6  -4  17   25.31   11.51
   6  -4  17   51.02   14.40
   6   4  17   32.43   13.25
   6   4  17   32.93   13.70
   6  -4  18   -1.94   15.94
   6  -4  18   -3.59   14.65
   6   4  18  -23.17   11.61
   6   4  18    0.20   12.26
   6  -4  19    9.37   16.94
   6  -4  19   22.32   19.58
   6   4  19   -6.48   12.41
   6   4  19    6.33   12.60
   6  -5 -20  -17.09   13.15
  -6  -5  20    6.33   13.80
  -6  -5  20   12.70   11.96
   6   5 -20   -5.03   13.00
  -6   5  20    0.85   13.45
  -6   5  20    8.97   13.40
   6  -5 -19  440.41   23.76
  -6  -5  19  479.52   24.96
   6   5 -19  475.89   25.21
  -6   5  19  473.20   24.31
  -6   5  19  479.67   26.85
   6  -5 -18   27.05   11.56
  -6  -5  18   29.24   10.41
   6   5 -18    4.53   10.06
  -6   5  18   26.31   10.36
  -6   5  18    7.67   12.36
   6  -5 -17   66.31   12.85
  -6  -5  17   43.19    9.96
   6   5 -17   76.72   11.31
  -6   5  17   76.18   14.65
  -6   5  17   31.64   12.26
   6  -5 -16  119.92   13.25
  -6  -5  16  126.15   11.21
   6   5 -16  127.59   11.66
  -6   5  16  124.90   13.55
  -6   5  16   98.05   13.40
   6  -5 -15   24.41   11.96
  -6  -5  15   19.43    8.12
   6   5 -15   27.30    8.97
  -6   5  15   21.67   12.41
  -6   5  15   24.61   10.76
   6  -5 -14   78.92   12.26
  -6  -5  14  103.58   10.06
  -6   5  14   67.26   12.70
  -6   5  14   88.73   11.96
   6  -5 -13  274.06   17.39
  -6  -5  13  249.50   14.65
   6   5 -13  291.65   16.54
  -6   5  13  232.01   15.79
  -6   5  13  267.64   17.99
   6  -5 -12  211.94   15.44
  -6  -5  12  210.34   13.25
   6   5 -12  239.94   15.69
  -6   5  12  198.83   16.14
   6  -5 -11 1176.76   52.46
  -6  -5  11 1161.32   50.92
   6   5 -11 1221.60   53.71
  -6   5  11 1234.06   55.35
   6  -5 -10    1.05    9.37
  -6  -5  10   20.53    7.27
   6   5 -10   36.37    8.52
  -6   5  10   15.00   10.41
   6  -5  -9 1177.76   52.61
  -6  -5   9 1205.66   52.56
   6   5  -9 1239.04   54.55
  -6   5   9 1198.19   53.31
   6  -5  -8   77.27   11.66
  -6  -5   8   55.35    8.62
   6   5  -8   52.91    8.62
  -6   5   8   40.90    9.07
   6  -5  -7 1421.88   62.57
  -6  -5   7 1376.54   59.98
   6   5  -7 1355.62   59.39
  -6   5   7 1354.12   59.59
   6  -5  -6  196.34   13.95
  -6  -5   6  202.77   13.45
   6   5  -6  174.97   12.70
  -6   5   6  169.34   12.41
   6  -5  -5   42.80    8.52
  -6  -5   5   37.37    8.67
   6   5  -5   37.07    8.32
  -6   5   5   20.33    8.32
   6  -5  -4   48.08    8.37
  -6  -5   4   62.28    8.82
   6   5  -4   38.11    8.97
  -6   5   4   57.29    8.82
   6  -5  -3  870.37   39.16
  -6  -5   3  872.36   39.71
   6   5  -3  887.31   40.45
  -6   5   3  848.94   38.41
   6  -5  -2    4.83    7.77
  -6  -5   2   19.28    8.92
   6   5  -2   28.50    8.62
  -6   5   2   17.19    7.87
   6  -5  -1  856.91   38.46
  -6  -5   1  798.13   37.17
   6   5  -1  811.08   37.61
  -6   5   1  776.21   34.92
   6  -5   0  122.51   10.16
  -6  -5   0  112.00   12.70
   6   5   0   93.86   10.61
  -6   5   0   98.35    8.87
   6  -5   1 2246.91   95.06
  -6  -5  -1 2102.43   90.27
   6   5   1 2147.27   92.07
  -6   5  -1 2154.24   91.27
   6  -5   2   28.55    6.83
  -6  -5  -2   36.97   11.51
   6   5   2   23.86    8.87
  -6   5  -2   36.97    6.93
   6  -5   3 1448.78   61.58
  -6  -5  -3 1423.38   62.97
   6   5   3 1399.46   61.83
  -6   5  -3 1429.85   61.08
   6   5   4  472.55   24.41
  -6   5  -4  496.16   22.92
   6  -5   5  101.43    7.17
  -6  -5  -5   70.35   11.96
   6   5   5   70.65   11.26
  -6   5  -5   85.79    7.77
   6  -5   6   72.64    6.48
  -6  -5  -6   64.72   12.06
   6   5   6   66.21   11.71
  -6   5  -6   66.81    7.47
   6  -5   7  103.93    7.32
  -6  -5  -7  112.49   14.10
   6   5   7  103.53   14.30
  -6   5  -7   94.01    8.22
   6  -5   8   31.98    5.28
   6  -5   8   38.46    6.03
  -6  -5  -8   37.17   13.50
   6   5   8   36.62   11.56
  -6   5  -8   48.67    7.07
   6  -5   9 1545.93   65.61
   6  -5   9 1565.36   66.01
  -6  -5  -9 1530.99   67.61
   6   5   9 1557.89   67.76
   6   5   9 1601.73   70.55
  -6   5  -9 1566.86   66.71
   6  -5  10   -0.95    5.08
   6  -5  10    4.38    6.08
  -6  -5 -10   19.88   12.75
   6   5  10    3.54   11.01
   6   5  10   10.96   12.85
   6  -5  11 1135.41   48.23
   6  -5  11 1111.50   47.68
  -6  -5 -11 1210.14   54.60
   6   5  11 1172.78   53.06
   6   5  11 1202.17   54.11
   6  -5  12    7.27    6.08
   6  -5  12    5.98    6.58
  -6  -5 -12   -4.18   13.15
   6   5  12  -14.90   12.80
   6   5  12   -8.27   12.90
   6  -5  13  556.00   24.91
   6  -5  13  585.89   26.50
  -6  -5 -13  647.17   32.23
   6   5  13  605.82   30.54
   6   5  13  668.09   33.18
   6  -5  14   37.61    7.77
   6  -5  14   43.09    7.87
  -6  -5 -14   35.92   12.85
   6   5  14   61.63   12.11
   6   5  14   46.13   12.85
   6  -5  15  303.56   16.74
   6  -5  15  314.77   16.59
  -6  -5 -15  345.26   22.07
   6   5  15  338.08   20.33
   6   5  15  285.82   18.83
   6  -5  16   76.97   10.71
   6  -5  16   60.48    9.32
   6   5  16   66.86   12.50
   6   5  16   87.93   14.10
   6  -5  17    1.49    9.91
   6  -5  17    8.22   10.91
   6   5  17   10.26   13.40
   6   5  17   -6.73   12.36
   6  -5  18   -2.24   11.61
   6  -5  18   -6.78   12.41
   6   5  18   26.55   12.80
   6   5  18   31.09   11.76
   6   5  19   11.81   15.79
   6  -6 -20  241.28   20.53
  -6  -6  20  209.55   18.68
  -6  -6  20  201.97   16.34
   6   6 -20  219.31   17.74
  -6   6  20  241.03   17.59
  -6   6  20  245.32   18.33
   6  -6 -19   -9.62   13.55
  -6  -6  19   -4.63   12.36
  -6  -6  19    1.49   14.00
   6   6 -19    3.54   12.41
  -6   6  19   -0.95   12.90
  -6   6  19   -9.62   13.40
   6  -6 -18  302.06   18.68
  -6  -6  18  307.44   18.28
   6   6 -18  263.10   18.08
  -6   6  18  252.69   16.89
  -6   6  18  315.17   20.83
   6  -6 -17   34.82   12.36
  -6  -6  17   22.12    9.67
   6   6 -17   30.64   10.76
  -6   6  17   15.54   10.86
  -6   6  17   10.46   13.55
   6  -6 -16   59.49   12.65
  -6  -6  16   62.43    9.37
   6   6 -16   73.24   10.86
  -6   6  16   50.37   12.70
  -6   6  16   48.03   13.90
   6  -6 -15  153.80   13.25
  -6  -6  15  161.12   12.11
   6   6 -15  128.89   11.81
  -6   6  15  140.25   13.30
  -6   6  15  142.74   14.25
   6  -6 -14  132.02   14.25
  -6  -6  14  120.22   11.16
   6   6 -14  110.35   11.46
  -6   6  14  125.25   14.05
  -6   6  14  136.71   15.05
   6  -6 -13  314.17   19.68
  -6  -6  13  326.92   17.39
   6   6 -13  268.83   16.39
  -6   6  13  267.74   17.59
  -6   6  13  289.36   19.28
   6  -6 -12  383.07   20.73
  -6  -6  12  411.22   21.02
   6   6 -12  443.15   23.02
  -6   6  12  407.88   23.37
  -6   6  12  401.11   22.17
   6  -6 -11  241.33   16.89
  -6  -6  11  223.99   14.35
   6   6 -11  256.38   15.34
  -6   6  11  215.03   16.94
  -6   6  11  228.78   16.29
   6  -6 -10 1459.74   64.52
  -6  -6  10 1478.68   63.87
   6   6 -10 1369.57   59.78
  -6   6  10 1530.99   67.36
   6  -6  -9   93.61   12.26
  -6  -6   9  122.51   11.36
   6   6  -9  117.83   11.31
  -6   6   9   97.90   13.00
   6  -6  -8  972.00   43.89
  -6  -6   8  953.07   42.70
   6   6  -8  919.69   41.50
  -6   6   8  909.23   42.45
   6  -6  -7   32.33    9.37
  -6  -6   7   45.39    8.77
   6   6  -7   22.67    9.57
  -6   6   7   41.10   10.31
   6  -6  -6  638.70   30.44
  -6  -6   6  621.26   29.29
   6   6  -6  627.24   30.19
  -6   6   6  581.90   28.45
   6  -6  -5   -0.20    9.52
  -6  -6   5    2.34    8.77
   6   6  -5   17.74    8.17
  -6   6   5    4.63    8.47
   6  -6  -4   27.05    9.42
  -6  -6   4   17.14    9.02
   6  -6  -3  128.94   11.01
  -6  -6   3  128.24   11.86
   6   6  -3   92.92   10.81
  -6   6   3   92.52    9.96
   6  -6  -2  607.31   28.60
  -6  -6   2  610.30   29.74
   6   6  -2  550.02   26.90
  -6   6   2  560.48   26.65
   6  -6  -1   49.82    8.27
  -6  -6   1   48.72   10.91
   6   6  -1   46.38   10.66
  -6   6   1   33.48    7.77
   6  -6   0 1279.39   54.80
  -6  -6   0 1226.58   54.30
   6   6   0 1271.92   56.50
  -6   6   0 1330.21   57.49
   6  -6   1  -11.16    6.03
  -6  -6  -1   -6.97    9.52
   6   6   1   -3.04    9.42
  -6   6  -1    1.39    6.28
   6  -6   2  685.03   30.44
  -6  -6  -2  705.46   34.68
   6   6   2  628.24   30.79
  -6   6  -2  642.69   29.10
   6  -6   3  455.66   21.17
  -6  -6  -3  455.16   24.96
   6   6   3  414.11   22.62
  -6   6  -3  458.80   21.27
   6  -6   4 1078.12   46.18
  -6  -6  -4  957.55   44.74
   6   6   4 1101.04   49.62
  -6   6  -4 1049.22   45.24
   6  -6   5   66.16    5.98
  -6  -6  -5   61.88   13.40
   6   6   5   54.85   12.90
  -6   6  -5   88.08    7.22
   6  -6   6  198.29    9.42
  -6  -6  -6  209.00   17.34
   6   6   6  172.08   15.69
  -6   6  -6  177.51    9.12
  -6  -6  -7  100.14   14.15
   6   6   7  104.77   13.10
  -6  -6  -8  264.35   18.93
   6   6   8  218.91   17.04
   6   6   8  240.83   16.54
  -6  -6  -9   17.54   13.20
   6   6   9   43.05   12.55
   6   6   9   22.07   12.50
  -6  -6 -10  955.06   44.49
   6   6  10  894.78   42.05
   6   6  10  980.47   44.89
  -6  -6 -11  -10.76   13.35
   6   6  11   11.61   13.05
   6   6  11    2.69   12.50
  -6  -6 -12  694.00   33.98
   6   6  12  711.94   35.22
   6   6  12  713.93   34.03
  -6  -6 -13   29.05   13.00
   6   6  13   24.51   11.06
   6   6  13   41.90   13.55
  -6  -6 -14  410.67   24.01
   6   6  14  403.45   22.67
   6   6  14  360.80   20.73
  -6  -6 -15   45.93   13.05
   6   6  15   52.51   13.35
   6   6  15   46.43   14.05
   6   6  16   50.32   13.10
   6   6  16   46.03   12.36
   6   6  17   54.01   14.05
   6   6  17   54.55   12.95
   6   6  18    2.19   13.65
   6   6  18    5.83   13.55
   6  -7 -19  250.00   20.33
  -6  -7  19  232.51   22.97
  -6  -7  19  257.37   21.22
   6   7 -19  228.93   20.08
  -6   7  19  239.04   17.54
  -6   7  19  269.63   20.03
   6  -7 -18   14.15   13.00
  -6  -7  18    3.19   12.70
   6   7 -18   19.58   14.50
  -6   7  18   37.27   13.50
  -6   7  18   16.14   13.00
   6  -7 -17  161.52   14.45
  -6  -7  17  177.21   14.20
   6   7 -17  163.06   15.34
  -6   7  17  116.38   16.14
  -6   7  17  166.00   15.64
   6  -7 -16   41.70   11.86
  -6  -7  16   39.31   10.46
   6   7 -16   39.61   11.76
  -6   7  16   42.00   12.95
  -6   7  16   36.77   13.05
   6  -7 -15   57.04   12.31
  -6  -7  15   46.78   10.46
   6   7 -15   39.81   10.26
  -6   7  15   70.50   14.35
  -6   7  15   53.36   12.70
   6  -7 -14    8.87   10.96
  -6  -7  14   31.98    9.07
   6   7 -14   14.60    9.17
  -6   7  14   13.05   10.71
  -6   7  14  -18.43   12.55
   6  -7 -13  235.95   16.74
  -6  -7  13  258.72   15.69
   6   7 -13  266.34   16.29
  -6   7  13  262.21   18.13
  -6   7  13  278.55   18.23
   6  -7 -12  113.99   14.00
  -6  -7  12  113.79   11.11
  -6   7  12   96.70   12.95
  -6   7  12  107.61   13.45
   6  -7 -11  766.74   35.72
  -6  -7  11  798.13   36.37
   6   7 -11  690.51   32.38
  -6   7  11  783.68   37.42
  -6   7  11  750.80   35.32
   6  -7 -10   41.45    9.47
  -6  -7  10   40.60    9.76
   6   7 -10   29.84   10.01
  -6   7  10   26.31   12.80
  -6   7  10   55.50   12.11
   6  -7  -9  972.00   44.09
  -6  -7   9  967.02   43.29
   6   7  -9  897.27   40.40
  -6   7   9 1023.81   46.83
  -6   7   9 1022.32   46.53
   6  -7  -8  147.22   14.25
  -6  -7   8  163.01   12.60
   6   7  -8  135.26   11.71
  -6   7   8  159.58   14.45
  -6   7   8  173.48   15.25
   6  -7  -7  693.00   33.58
  -6  -7   7  669.09   31.69
   6   7  -7  651.65   31.44
  -6   7   7  646.17   31.64
  -6   7   7  623.26   30.34
   6  -7  -6   88.48   12.21
  -6  -7   6  115.04   12.06
   6   7  -6   92.32   12.06
  -6   7   6   83.05   11.66
  -6   7   6   82.50   10.31
   6  -7  -5    3.39    8.67
  -6  -7   5    5.18    9.17
   6   7  -5    0.60   10.51
  -6   7   5   23.66   10.26
   6  -7  -4   30.64    9.47
  -6  -7   4   45.14   11.46
   6   7  -4   32.43   12.11
  -6   7   4   21.02   10.06
   6  -7  -3  401.60   20.68
  -6  -7   3  407.58   22.52
   6   7  -3  343.36   20.58
  -6   7   3  364.19   20.23
   6  -7  -2   74.88    9.81
  -6  -7   2   58.59   11.76
   6   7  -2   57.34   12.06
  -6   7   2   60.73    9.42
   6  -7  -1  749.80   34.58
  -6  -7   1  667.60   32.83
   6   7  -1  764.75   36.47
  -6   7   1  768.23   35.27
   6  -7   0   12.90    8.57
  -6  -7   0    7.02   11.51
   6   7   0   -6.68   10.41
  -6   7   0   17.89    7.92
   6  -7   1  647.67   29.74
  -6  -7  -1  721.90   34.87
   6   7   1  664.61   32.88
  -6   7  -1  664.61   30.39
   6  -7   2   14.20    6.48
  -6  -7  -2    1.99   10.91
   6   7   2   19.68   11.31
  -6   7  -2   -5.43    7.82
   6  -7   3 1187.72   50.72
  -6  -7  -3 1077.62   49.37
   6   7   3 1129.43   51.27
  -6   7  -3 1096.05   47.33
  -6   7  -3 1134.42   48.77
   6   7   4  309.59   20.18
  -6   7  -4  321.79   15.69
  -6   7  -4  337.39   16.14
  -6  -7  -5  129.73   14.70
   6   7   5  136.36   15.00
  -6  -7  -6   91.57   15.39
   6   7   6   93.71   13.05
  -6  -7  -7    4.53   12.26
   6   7   7    5.73   11.11
   6   7   7   -4.68   11.46
  -6  -7  -8   37.66   14.45
   6   7   8   16.09   12.31
   6   7   8   16.24   12.95
  -6  -7  -9  480.27   26.55
   6   7   9  409.87   24.01
   6   7   9  400.21   22.67
  -6  -7 -10   13.25   13.80
   6   7  10   12.80   12.46
   6   7  10   16.39   13.40
  -6  -7 -11  486.20   26.50
   6   7  11  506.18   27.20
   6   7  11  481.32   25.26
  -6  -7 -12   10.76   12.21
   6   7  12  -10.51   11.41
   6   7  12  -13.50   11.11
  -6  -7 -13  326.97   21.82
   6   7  13  333.90   19.53
   6   7  13  324.03   20.43
  -6  -7 -14   -5.38   13.85
   6   7  14   -1.00   12.90
   6   7  14    1.89   12.26
   6   7  15  172.53   16.54
   6   7  15  155.64   16.29
   6   7  16   62.03   14.40
   6   7  16   36.22   12.60
   6   7  17   -0.45   13.25
   6   7  17   18.53   15.05
   6   8 -18   90.08   19.38
  -6   8  18   36.97   14.10
   6  -8 -17   29.59   13.05
  -6  -8  17    2.64   15.99
   6   8 -17   18.58   15.74
  -6   8  17   15.20   14.00
  -6   8  17   25.51   13.45
   6  -8 -16    3.94   13.20
  -6  -8  16   23.61   13.80
   6   8 -16    0.90   14.80
  -6   8  16    5.93   13.25
  -6   8  16    5.93   12.75
   6  -8 -15   13.30   12.01
  -6  -8  15   17.34   13.55
   6   8 -15   -5.93   11.56
  -6   8  15    1.99   10.81
  -6   8  15   10.96   14.30
   6  -8 -14   81.36   11.56
  -6  -8  14  111.25   13.55
   6   8 -14   64.92   12.50
  -6   8  14   77.97   14.85
  -6   8  14   68.30   13.60
   6  -8 -13   62.43   12.95
  -6  -8  13   62.13   11.51
   6   8 -13   69.30   11.41
  -6   8  13   65.17   12.80
  -6   8  13   48.18   12.55
   6  -8 -12  323.88   19.33
  -6  -8  12  315.96   18.33
   6   8 -12  324.48   19.08
  -6   8  12  306.30   20.18
  -6   8  12  320.75   19.58
   6  -8 -11   18.18   11.61
  -6  -8  11   41.90   11.11
   6   8 -11    6.08    9.52
  -6   8  11    6.63   11.41
  -6   8  11   42.05   13.05
   6  -8 -10  921.18   42.70
  -6  -8  10  925.67   41.85
   6   8 -10  945.10   42.60
  -6   8  10  865.88   40.16
  -6   8  10  927.66   43.19
   6  -8  -9   90.08   12.70
  -6  -8   9  105.92   12.55
   6   8  -9  103.38   11.86
  -6   8   9   78.72   12.55
  -6   8   9   64.37   12.26
   6  -8  -8  259.96   16.09
  -6  -8   8  238.64   16.04
   6   8  -8  218.46   15.00
  -6   8   8  213.88   16.39
  -6   8   8  176.07   14.05
   6  -8  -7    5.08   10.36
  -6  -8   7   24.66   10.76
   6   8  -7   -4.43   10.41
  -6   8   7   11.56   10.96
  -6   8   7   -8.67   11.26
   6  -8  -6   50.12   11.31
  -6  -8   6   48.77   11.96
   6   8  -6   38.61   11.56
  -6   8   6   15.25   10.66
  -6   8   6   45.59   11.66
   6  -8  -5   52.21   11.61
  -6  -8   5   52.21   12.06
   6   8  -5   39.01   11.76
  -6   8   5   62.97   11.31
  -6   8   5   67.21   11.91
   6  -8  -4   -6.58   10.56
  -6  -8   4   13.60   11.21
   6   8  -4   -1.89   11.16
  -6   8   4   15.34   10.21
  -6   8   4   26.36   11.06
   6  -8  -3  257.12   16.49
  -6  -8   3  316.61   19.78
   6   8  -3  253.59   17.74
  -6   8   3  289.11   17.49
  -6   8   3  250.80   16.89
   6  -8  -2  359.80   19.43
  -6  -8   2  373.80   22.57
   6   8  -2  391.99   22.27
  -6   8   2  388.00   20.78
  -6   8   2  386.71   20.68
   6  -8  -1   65.61    9.47
  -6  -8   1   75.68   12.95
   6   8  -1   97.75   13.85
  -6   8   1   65.66   11.26
  -6   8   1   65.12   10.51
   6  -8   0 1065.17   46.23
  -6  -8   0 1123.95   51.32
   6   8   0 1106.52   50.57
  -6   8   0 1190.71   52.16
  -6   8   0 1152.35   50.57
   6  -8   1   19.33    8.12
  -6  -8  -1  -10.21   12.36
   6   8   1   -0.95   11.76
  -6   8  -1   -2.79    8.57
  -6   8  -1    7.27    7.87
   6  -8   2  943.10   41.50
  -6  -8  -2  881.83   41.65
   6   8   2  795.64   38.16
  -6   8  -2  925.67   40.65
  -6   8  -2  901.26   39.61
  -6  -8  -3  165.40   15.74
   6   8   3  186.93   16.04
  -6   8  -3  162.42   10.56
  -6   8  -3  185.23   11.01
  -6  -8  -4  420.79   24.66
   6   8   4  436.28   25.41
  -6  -8  -5   50.42   14.75
   6   8   5   29.89   12.21
   6   8   5   50.52   11.56
  -6  -8  -6   20.18   12.75
   6   8   6   24.66   12.50
   6   8   6   23.02   13.05
  -6  -8  -7  187.13   16.94
   6   8   7  153.35   14.90
   6   8   7  151.21   15.34
  -6  -8  -8   -2.34   13.60
   6   8   8   19.08   13.90
   6   8   8   35.02   12.85
  -6  -8  -9   23.07   13.55
   6   8   9   37.17   14.10
   6   8   9   24.61   13.45
  -6  -8 -10  332.60   21.62
   6   8  10  385.81   22.32
   6   8  10  374.80   23.12
  -6  -8 -11   -7.67   12.11
   6   8  11   12.26   11.76
   6   8  11   14.95   12.21
  -6  -8 -12  486.80   26.36
   6   8  12  413.46   23.57
   6   8  12  432.04   23.81
  -6  -8 -13    5.13   12.65
   6   8  13   -1.64   12.06
   6   8  13    3.29   13.15
   6   8  14  175.67   16.64
   6   8  14  167.75   16.74
   6   8  15   42.10   13.45
   6   8  15   52.96   13.60
   6   8  16   50.42   15.29
   6   8  16   40.06   15.64
   6  -9 -16   27.05   15.39
  -6  -9  16    5.73   20.03
   6   9 -16   14.25   14.55
  -6   9  16   23.96   14.05
  -6   9  16   46.63   14.50
   6  -9 -15   -3.29   14.25
  -6  -9  15   29.69   17.34
   6   9 -15   10.31   15.59
  -6   9  15   22.47   13.10
  -6   9  15    9.47   13.85
   6   9 -14   14.90   13.90
  -6   9  14   35.22   13.30
  -6   9  14    8.07   14.65
   6  -9 -13  155.14   16.59
  -6  -9  13  162.56   16.94
   6   9 -13  155.79   17.69
  -6   9  13  138.85   16.44
  -6   9  13  173.28   16.84
   6  -9 -12    6.43   12.06
  -6  -9  12   17.79   13.20
   6   9 -12   15.59   13.25
  -6   9  12   11.01   11.56
  -6   9  12    9.96   13.90
   6  -9 -11  370.32   21.62
  -6  -9  11  385.11   22.42
   6   9 -11  308.39   19.48
  -6   9  11  379.38   22.82
  -6   9  11  341.47   20.78
   6  -9 -10    3.79   12.80
  -6  -9  10    0.95   11.56
   6   9 -10   12.26   11.76
  -6   9  10  -19.18   12.06
  -6   9  10  -15.39   11.71
   6  -9  -9  273.66   18.38
  -6  -9   9  294.24   18.88
   6   9  -9  331.61   20.33
  -6   9   9  300.02   18.53
  -6   9   9  329.07   20.78
   6  -9  -8   90.13   12.65
  -6  -9   8   50.72   12.21
   6   9  -8   56.55   11.36
  -6   9   8   68.40   13.00
  -6   9   8   91.47   12.46
   6  -9  -7  385.56   21.22
  -6  -9   7  376.59   21.67
   6   9  -7  395.43   22.27
  -6   9   7  391.09   22.27
  -6   9   7  395.18   21.87
   6   9  -6  145.68   14.10
  -6   9   6  155.24   15.05
  -6   9   6  103.98   12.50
   6  -9  -5    0.45    9.62
  -6  -9   5   17.99   12.11
   6   9  -5   -9.27   11.76
  -6   9   5    6.78   11.21
  -6   9   5   12.21   10.01
   6  -9  -4   53.26   10.91
  -6  -9   4   69.40   13.10
   6   9  -4   60.78   13.20
  -6   9   4   59.83   10.91
  -6   9   4   61.78   11.66
   6  -9  -3   79.86   12.85
  -6  -9   3   65.86   13.90
   6   9  -3   65.46   12.65
  -6   9   3   80.66   12.31
  -6   9   3   69.35   11.46
   6  -9  -2   50.57   12.41
  -6  -9   2   43.84   12.80
   6   9  -2   36.72   12.90
  -6   9   2   31.44   10.81
  -6   9   2   45.04   11.31
   6  -9  -1  438.27   22.47
  -6  -9   1  441.86   25.06
   6   9  -1  384.76   23.17
  -6   9   1  373.16   20.53
  -6   9   1  377.64   20.28
  -6  -9   0   74.68   14.50
   6   9   0   43.05   13.85
  -6   9   0   72.44   10.96
  -6   9   0   68.40    9.86
  -6  -9  -1  873.85   41.70
   6   9   1  729.87   35.67
  -6   9  -1  765.24   34.92
  -6   9  -1  694.50   32.03
  -6  -9  -2   13.25   13.55
   6   9   2   13.80   11.51
  -6   9  -2    5.13    8.82
  -6   9  -2    4.78    7.87
  -6  -9  -3  792.65   39.26
   6   9   3  711.44   34.82
  -6   9  -3  695.99   30.59
  -6   9  -3  720.41   31.54
  -6  -9  -4  270.68   20.97
   6   9   4  245.57   18.58
   6   9   4  275.16   19.08
  -6  -9  -5  200.83   18.73
   6   9   5  178.06   16.94
   6   9   5  195.99   17.34
  -6  -9  -6   32.48   13.90
   6   9   6   78.87   13.90
   6   9   6   61.78   15.05
  -6  -9  -7   23.61   13.35
   6   9   7   11.01   12.90
   6   9   7   32.58   14.05
  -6  -9  -8   29.64   14.25
   6   9   8   34.68   12.55
   6   9   8   60.73   14.70
  -6  -9  -9  110.15   15.25
   6   9   9  137.16   15.69
   6   9   9  117.53   14.70
  -6  -9 -10   17.44   14.00
   6   9  10   21.02   13.05
   6   9  10   21.67   13.70
  -6  -9 -11  289.91   20.73
   6   9  11  243.42   18.98
   6   9  11  240.83   19.33
  -6  -9 -12    0.45   14.75
   6   9  12   -8.52   12.60
   6   9  12   13.40   13.70
   6   9  13  189.12   17.39
   6   9  13  191.51   16.59
   6   9  14   13.00   15.79
   6   9  14   12.46   12.06
  -6 -10  14    3.74   17.24
   6  10 -14   -7.17   13.00
  -6  10  14   40.06   16.49
  -6  10  14    6.63   14.60
  -6 -10  13   37.56   17.44
   6  10 -13   -0.60   14.65
  -6  10  13   16.09   16.39
  -6  10  13    8.57   12.36
  -6 -10  12  132.17   17.99
   6  10 -12  201.82   18.04
  -6  10  12  168.99   18.18
  -6  10  12  158.93   16.94
  -6 -10  11   19.18   15.69
   6  10 -11   13.80   17.89
  -6  10  11    8.72   14.20
  -6  10  11    5.33   14.05
   6 -10 -10  258.62   18.28
  -6 -10  10  277.60   20.73
   6  10 -10  282.13   20.68
  -6  10  10  290.85   19.78
  -6  10  10  293.39   20.23
   6 -10  -9   21.22   11.51
  -6 -10   9    7.32   14.70
   6  10  -9   21.77   16.04
  -6  10   9   26.80   12.26
  -6  10   9   28.25   13.95
   6 -10  -8  214.38   17.14
  -6 -10   8  237.59   17.74
  -6  10   8  243.12   18.23
  -6  10   8  226.34   17.09
   6 -10  -7   32.68   10.61
  -6 -10   7   21.52   13.90
   6  10  -7   47.53   13.50
  -6  10   7   38.31   12.65
  -6  10   7    8.62   12.01
   6 -10  -6   49.37   11.56
  -6 -10   6   41.30   13.30
   6  10  -6   51.56   12.95
  -6  10   6   53.41   11.26
  -6  10   6   36.07   12.11
  -6 -10   5   37.22   13.60
   6  10  -5   28.10   13.15
  -6  10   5   52.91   12.21
  -6  10   5   37.91   12.01
  -6 -10   4   -0.55   13.10
   6  10  -4    2.69   12.60
  -6  10   4   -2.99   11.11
  -6  10   4   15.29   10.96
  -6 -10   3   81.16   13.80
   6  10  -3   68.90   13.40
  -6  10   3   64.82   12.01
  -6  10   3   77.72   12.41
  -6 -10   2  114.19   15.74
   6  10  -2   90.87   14.80
  -6  10   2  125.40   14.20
  -6  10   2  116.38   13.90
  -6 -10   1   68.80   14.50
   6  10  -1   54.70   13.95
  -6  10   1   66.56   12.60
  -6  10   1   62.97   12.31
  -6 -10   0  541.05   29.00
   6  10   0  503.19   27.10
  -6  10   0  498.70   25.11
  -6  10   0  509.67   25.36
  -6 -10  -1    9.17   14.85
   6  10   1   11.96   11.61
   6  10   1    2.54   13.15
  -6  10  -1   -2.54    9.47
  -6  10  -1   17.94   10.16
  -6 -10  -2  419.79   25.11
   6  10   2  393.08   23.42
   6  10   2  416.05   23.37
  -6  10  -2  446.89   21.82
  -6  10  -2  419.29   20.78
  -6 -10  -3   90.72   15.79
   6  10   3   96.30   13.75
   6  10   3   79.91   14.70
  -6 -10  -4  111.00   16.54
   6  10   4  111.15   15.44
   6  10   4  132.82   15.49
  -6 -10  -5   70.45   16.04
   6  10   5   66.36   14.55
   6  10   5   63.12   15.69
  -6 -10  -6   30.49   15.54
   6  10   6   18.88   13.20
   6  10   6   34.23   14.35
  -6 -10  -7   68.30   15.20
   6  10   7   40.95   14.70
   6  10   7   38.06   15.34
  -6 -10  -8   -3.99   13.40
   6  10   8   41.60   13.20
   6  10   8   17.69   14.05
  -6 -10  -9   69.15   15.79
   6  10   9   57.69   14.70
   6  10   9   95.06   16.34
  -6 -10 -10   82.45   14.40
   6  10  10  130.23   15.84
   6  10  10   98.69   14.45
  -6 -10 -11   13.70   14.65
   6  10  11   29.79   14.70
   6  10  11   23.02   14.40
   6  10  12  172.73   17.59
   6  10  12  180.30   17.14
  -6 -11  12   13.50   21.67
   6  11 -12    1.49   12.75
  -6  11  12  -13.70   15.10
  -6  11  12   -5.38   15.34
  -6 -11  11   86.19   21.37
   6  11 -11   80.01   16.69
  -6  11  11  101.14   15.89
  -6  11  11  111.60   16.49
  -6 -11  10   19.63   19.18
   6  11 -10    4.53   18.58
  -6  11  10  -22.57   15.05
  -6  11  10  -18.13   14.00
  -6 -11   9  240.43   23.32
   6  11  -9  231.07   23.07
  -6  11   9  252.89   19.58
  -6  11   9  250.60   18.58
  -6 -11   8   46.68   19.08
   6  11  -8   31.94   16.64
  -6  11   8   39.66   14.35
  -6  11   8   61.58   13.05
  -6 -11   7  164.61   19.63
   6  11  -7  171.63   18.93
  -6  11   7  162.86   16.44
  -6  11   7  167.10   16.74
  -6 -11   6    0.60   17.74
   6  11  -6   -6.93   15.54
  -6  11   6   35.42   13.90
  -6  11   6   12.60   13.70
  -6 -11   5   24.56   16.64
   6  11  -5   14.40   15.05
  -6  11   5   -7.97   13.45
  -6  11   5    9.67   12.65
  -6 -11   4   61.28   18.78
   6  11  -4   51.46   15.10
  -6  11   4   58.99   13.40
  -6  11   4   31.64   12.41
  -6 -11   3   35.57   16.04
   6  11  -3   49.22   14.05
   6  11  -3   26.80   14.70
  -6  11   3   41.50   13.50
  -6  11   3   54.40   12.95
  -6 -11   2   70.20   17.69
   6  11  -2   56.60   13.90
   6  11  -2   54.65   14.35
  -6  11   2   91.77   14.55
  -6  11   2   82.65   15.49
  -6 -11   1  174.72   18.53
   6  11  -1  203.17   18.04
   6  11  -1  195.00   17.19
  -6  11   1  172.03   16.04
  -6  11   1  198.93   18.33
  -6 -11   0   10.51   16.34
   6  11   0    5.08   14.35
   6  11   0   21.27   14.45
  -6  11   0   24.36   13.55
  -6  11   0   18.33   13.50
  -6 -11  -1  172.58   18.98
   6  11   1  218.96   18.83
   6  11   1  208.20   18.04
  -6  11  -1  222.45   16.29
  -6  11  -1  178.06   15.34
  -6 -11  -2   -6.97   13.70
   6  11   2   18.13   13.85
   6  11   2   13.20   14.30
  -6 -11  -3   92.87   16.09
  -6 -11  -4   34.23   15.15
   6  11   4   51.37   14.35
   6  11   4   27.60   15.00
  -6 -11  -5   37.51   15.39
   6  11   5   63.12   15.49
   6  11   5   66.31   13.85
  -6 -11  -6   55.15   15.49
   6  11   6   72.04   16.14
   6  11   6   60.43   15.69
  -6 -11  -7   13.55   16.59
   6  11   7   -6.38   15.44
   6  11   7   26.36   13.70
  -6 -11  -8   49.67   16.04
   6  11   8   59.69   15.59
   6  11   8   44.14   15.29
  -6 -11  -9   56.20   16.34
   6  11   9   35.52   15.44
   6  11   9   74.28   15.15
   6  11  10   14.70   14.70
   6  11  10   11.46   14.55
  -6 -12   9  -24.36   27.85
   6  12  -9   10.46   18.88
   6  12  -9   24.71   20.03
  -6  12   9    7.92   15.79
  -6  12   9   15.54   15.25
  -6 -12   8   96.25   24.11
   6  12  -8   88.43   22.47
   6  12  -8  102.53   22.97
  -6  12   8  135.11   18.93
  -6  12   8  140.05   17.74
  -6 -12   7   14.85   22.32
   6  12  -7    5.38   19.03
   6  12  -7   -2.04   21.82
  -6  12   7   32.53   16.64
  -6  12   7  -11.06   15.39
  -6 -12   6   72.99   22.82
   6  12  -6   99.59   21.82
   6  12  -6   61.68   21.52
  -6  12   6  116.28   18.08
  -6 -12   5   52.51   23.12
   6  12  -5   27.60   19.93
   6  12  -5  -14.20   19.33
  -6  12   5    8.82   16.79
  -6  12   5   24.91   15.89
  -6 -12   4  -24.71   19.88
   6  12  -4   14.60   18.04
   6  12  -4  -14.30   18.13
  -6  12   4  -18.63   15.25
  -6  12   4   19.98   15.49
  -6 -12   3   42.30   19.83
   6  12  -3   35.72   17.29
   6  12  -3   37.81   17.34
  -6  12   3   22.27   17.64
  -6  12   3    9.76   16.04
  -6 -12   2   26.95   19.98
   6  12  -2   41.85   18.33
   6  12  -2   48.87   17.34
  -6  12   2   76.03   16.94
  -6  12   2   53.41   17.79
  -6 -12   1  -11.86   18.13
   6  12  -1   14.20   16.29
   6  12  -1   19.73   16.09
  -6  12   1   -1.89   16.54
  -6  12   1  -12.06   14.55
  -6 -12   0   55.10   18.68
   6  12   0   74.23   17.44
   6  12   0  132.02   17.74
  -6  12   0  100.29   16.29
  -6  12   0   76.62   16.34
  -6 -12  -1   15.94   16.74
   6  12   1  -10.71   15.84
   6  12   1   -0.20   15.10
  -6  12  -1  -10.96    9.22
  -6  12  -1   -3.64    9.91
  -6 -12  -2   93.31   18.18
   6  12   2   99.29   16.49
   6  12   2   86.79   16.69
  -6 -12  -3  -14.15   16.29
   6  12   3    9.12   16.54
   6  12   3   -2.49   15.15
  -6 -12  -4   41.45   16.34
   6  12   4    1.49   16.64
   6  12   4   27.70   15.05
  -6 -12  -5   40.01   17.59
   6  12   5   43.49   14.75
   6  12   5   31.84   17.24
  -6 -12  -6    6.43   16.24
   6  12   6    3.24   14.85
   6  12   6   -2.14   17.04
  -6 -12  -7    8.12   16.59
   6  12   7    2.74   18.48
   6  12   7   11.26   15.34
   7   0 -22   70.84   13.60
  -7   0  22   49.17   12.55
  -7   0  22   39.71   12.55
   7   0 -21   -9.02   10.36
  -7   0  21  -11.36   13.00
  -7   0  21   -1.59   10.61
   7   0 -20    5.93   10.96
  -7   0  20   11.86   10.86
  -7   0  20   -8.22    9.52
   7   0 -19   -2.49   10.21
  -7   0  19    0.30   10.81
   7   0 -18  389.60   21.07
  -7   0  18  436.53   23.07
   7   0 -17    3.29    9.12
  -7   0  17   -3.29    9.22
   7   0 -16 1582.30   68.80
  -7   0  16 1711.84   74.43
   7   0 -15    2.79    9.07
  -7   0  15   -7.07   10.36
   7   0 -14  574.43   28.40
  -7   0  14  591.87   29.64
   7   0 -13  -12.80    8.92
  -7   0  13  -10.21   10.31
   7   0 -12  647.67   31.39
  -7   0  12  627.24   30.89
   7   0 -11    1.15   10.21
  -7   0  11   -5.18    9.27
   7   0 -10   10.81   10.16
  -7   0  10   16.94    8.52
   7   0  -9    6.73    9.52
  -7   0   9   -0.20    9.07
   7   0  -8  944.60   43.00
  -7   0   8  910.72   41.55
   7   0  -7   -0.60    7.37
  -7   0   7    7.97    8.42
   7   0  -6 1576.82   68.30
  -7   0   6 1691.41   73.09
   7   0  -5   -5.43    7.17
  -7   0   5   -0.10    7.42
   7   0  -4 2129.33   90.87
  -7   0   4 2158.73   92.22
   7   0  -3    4.09    7.17
  -7   0   3   -5.48    8.47
   7   0  -2 2372.96  100.84
  -7   0   2 2156.73   91.82
   7   0  -1    4.93    8.07
  -7   0   1   -3.14    7.52
   7   0   0   48.18    8.87
  -7   0   0   46.83    9.37
   7   0   1   -9.47    8.07
  -7   0  -1    1.15    8.27
   7   0   2   45.19    8.37
  -7   0  -2   36.87    9.32
   7   0   3   -3.74    7.57
  -7   0  -3   12.41    9.17
   7   0   4  766.24   35.67
  -7   0  -4  813.57   37.51
   7   0   5   -4.68    8.77
  -7   0  -5   10.81    9.86
   7   0   6 4696.09  196.19
  -7   0  -6 4775.81  199.98
   7   0   7    8.32    7.72
  -7   0  -7   -1.30    9.86
   7   0   8 3578.12  150.61
  -7   0  -8 3622.96  152.60
   7   0   9  -15.20    9.32
  -7   0  -9   -7.42    9.37
   7   0  10  790.16   36.47
  -7   0 -10  799.62   37.47
   7   0  11   18.93    9.02
   7   0  11    0.45    8.57
  -7   0 -11   23.66   10.01
   7   0  12   52.61    9.76
   7   0  12   40.80   11.11
  -7   0 -12   36.82   10.61
   7   0  13   16.14   10.51
   7   0  13   -4.38    9.37
  -7   0 -13  -22.12   10.81
   7   0  14  334.05   18.93
   7   0  14  340.08   20.28
  -7   0 -14  323.63   19.48
   7   0  15    1.49   10.91
   7   0  15  -13.85   10.61
  -7   0 -15   11.46   10.21
   7   0  16  567.96   28.20
   7   0  16  593.36   28.55
   7   0  17  -11.96   10.26
   7   0  17   12.95   11.46
   7   0  18  588.38   29.59
   7   0  18  586.39   29.99
   7   0  19  -13.90   12.90
   7   0  19   16.49   14.40
   7   0  20  215.18   21.82
   7  -1 -22    3.09   13.40
  -7  -1  22  -13.55   11.76
  -7  -1  22    4.88   11.86
   7   1 -22    2.14   13.20
  -7   1  22   -6.88   11.11
  -7   1  22    7.42   12.55
   7  -1 -21   18.13   11.61
  -7  -1  21   30.74   11.86
  -7  -1  21   13.95   11.21
   7   1 -21   32.28   10.96
  -7   1  21   27.30   11.61
  -7   1  21   36.42   11.76
   7  -1 -20   15.10   12.41
  -7  -1  20   26.85   11.06
   7   1 -20   28.00   11.56
  -7   1  20   57.39   11.76
  -7   1  20   21.52   10.51
   7  -1 -19  187.18   14.85
  -7  -1  19  199.78   15.39
   7   1 -19  202.92   14.60
  -7   1  19  195.99   15.34
  -7   1  19  236.40   17.39
   7  -1 -18   -4.63   11.06
  -7  -1  18   11.41    9.76
   7   1 -18   30.39    9.67
  -7   1  18    5.28    9.96
   7  -1 -17  707.45   33.68
  -7  -1  17  669.09   32.03
   7   1 -17  781.19   36.07
  -7   1  17  704.46   33.93
   7  -1 -16    5.43    9.42
  -7  -1  16   12.75   10.16
   7   1 -16   14.35    9.07
  -7   1  16   -5.33   10.41
   7  -1 -15 1461.74   64.12
  -7  -1  15 1470.21   64.12
   7   1 -15 1432.84   62.77
  -7   1  15 1489.64   65.51
   7  -1 -14   82.25   11.31
  -7  -1  14  112.30   11.91
   7   1 -14  119.62   11.11
  -7   1  14  117.73   11.81
   7  -1 -13 1683.44   73.24
  -7  -1  13 1714.33   74.28
   7   1 -13 1649.56   71.54
  -7   1  13 1740.73   75.83
   7  -1 -12   47.48   10.06
  -7  -1  12   53.31    9.32
   7   1 -12   57.54   10.41
  -7   1  12   55.80   11.06
   7  -1 -11  224.74   15.25
  -7  -1  11  200.53   14.00
   7   1 -11  242.58   16.19
  -7   1  11  228.78   15.54
   7  -1 -10  335.29   19.28
  -7  -1  10  354.32   19.63
   7   1 -10  327.52   19.18
  -7   1  10  320.94   18.88
   7  -1  -9  246.21   15.69
  -7  -1   9  212.63   14.25
   7   1  -9  223.89   14.90
  -7   1   9  230.32   15.20
   7  -1  -8   33.93   10.01
  -7  -1   8   41.45    8.92
   7   1  -8   45.79    8.67
  -7   1   8   56.15    9.07
   7  -1  -7  989.94   44.69
  -7  -1   7  993.92   44.49
   7   1  -7 1049.72   46.98
  -7   1   7  965.03   43.64
   7  -1  -6   11.76    7.97
  -7  -1   6   30.79    9.02
   7   1  -6   10.36    8.17
  -7   1   6   20.33    8.37
   7  -1  -5 2272.82   96.75
  -7  -1   5 2231.96   95.36
   7   1  -5 2131.33   91.02
  -7   1   5 2229.47   95.21
   7  -1  -4   32.08    9.02
  -7  -1   4   15.20    8.92
   7   1  -4   24.81    7.97
  -7   1   4   25.86    8.42
   7  -1  -3 3411.72  143.78
  -7  -1   3 3348.44  141.19
   7   1  -3 3514.35  148.22
  -7   1   3 3533.28  148.61
   7  -1  -2   43.05    7.67
  -7  -1   2   24.71    8.47
   7   1  -2   54.20    9.27
  -7   1   2   34.28    9.27
   7  -1  -1  720.90   32.98
  -7  -1   1  776.70   35.57
   7   1  -1  780.19   35.87
  -7   1   1  829.02   37.61
   7  -1   0   53.36    7.87
  -7  -1   0   66.26    9.47
   7   1   0   51.71    9.72
  -7   1   0   57.64    9.12
   7  -1   1  512.65   24.76
  -7  -1  -1  489.89   24.36
   7   1   1  500.70   25.16
  -7   1  -1  501.20   24.56
   7  -1   2   53.46    8.87
  -7  -1  -2   61.13   10.31
   7   1   2   31.74    8.32
  -7   1  -2   62.43    9.12
   7  -1   3  683.04   31.74
  -7  -1  -3  710.94   33.48
   7   1   3  733.36   34.03
  -7   1  -3  720.41   33.38
   7  -1   4    1.35    6.83
  -7  -1  -4    2.39    9.57
   7   1   4   -0.90    8.02
  -7   1  -4   12.41    8.52
   7  -1   5 2176.17   92.22
  -7  -1  -5 2161.72   92.67
   7   1   5 2108.41   90.32
  -7   1  -5 2186.63   93.36
   7   1   6   20.92    8.52
  -7   1  -6   -1.54    9.22
   7  -1   7 3007.17  127.24
  -7  -1  -7 3108.31  131.78
   7   1   7 2918.49  123.75
  -7   1  -7 3005.68  126.99
   7  -1   8   32.28    8.72
  -7  -1  -8   21.67    9.57
   7   1   8   29.39    9.47
  -7   1  -8   20.68    9.91
   7  -1   9 1247.01   54.45
  -7  -1  -9 1349.14   59.64
   7   1   9 1316.26   57.44
  -7   1  -9 1282.88   56.45
   7  -1  10   11.01    8.57
  -7  -1 -10   40.80   11.56
   7   1  10   19.68    9.67
  -7   1 -10   40.95   10.26
   7  -1  11  301.81   17.69
   7  -1  11  324.33   18.63
  -7  -1 -11  258.47   17.59
   7   1  11  283.78   18.04
   7   1  11  278.95   16.99
  -7   1 -11  306.90   18.88
   7  -1  12    5.98    9.76
   7  -1  12   12.55   10.21
  -7  -1 -12    6.03   11.41
   7   1  12   10.26   10.26
   7   1  12    4.73   10.81
  -7   1 -12   16.74   10.86
   7  -1  13  157.63   13.80
   7  -1  13  166.35   12.31
  -7  -1 -13  159.53   14.80
   7   1  13  188.27   15.25
  -7   1 -13  200.33   15.29
   7  -1  14   15.39   10.91
   7  -1  14   15.00    9.76
  -7  -1 -14   14.55   11.56
   7   1  14    6.48   11.31
   7   1  14   -6.13   10.11
  -7   1 -14   14.95   11.51
   7  -1  15  259.67   16.99
   7  -1  15  271.12   16.74
  -7  -1 -15  286.42   17.89
   7   1  15  265.64   17.04
   7   1  15  280.49   17.89
  -7   1 -15  263.55   16.54
   7  -1  16   35.07   11.21
   7  -1  16   16.19   11.81
  -7  -1 -16   21.82   11.01
   7   1  16   35.52   11.91
   7   1  16   40.80   11.76
   7  -1  17  483.66   25.46
   7  -1  17  519.63   26.85
   7   1  17  445.84   23.66
   7   1  17  495.27   25.61
   7  -1  18   10.76   12.31
   7  -1  18   11.21   14.40
   7  -1  19  294.84   21.02
   7  -1  19  329.12   21.07
   7   1  19  370.02   22.27
   7   1  19  334.45   20.38
   7  -2 -22  102.73   16.64
  -7  -2  22  105.07   14.35
   7   2 -22  116.68   15.49
  -7   2  22  115.33   16.09
   7  -2 -21    6.18   11.51
  -7  -2  21   -6.97   10.41
  -7  -2  21  -13.70   11.96
   7   2 -21   11.46   11.81
  -7   2  21    8.22   12.16
  -7   2  21   14.00   11.21
   7  -2 -20   11.41   13.20
  -7  -2  20   20.83   10.11
   7   2 -20   12.75   10.46
  -7   2  20    0.55   11.91
  -7   2  20   19.08   11.11
   7  -2 -19  -15.34   11.01
  -7  -2  19   -6.08    9.07
   7   2 -19  -18.04    9.67
  -7   2  19  -17.89   11.61
  -7   2  19   18.28   12.06
   7  -2 -18  262.95   17.89
  -7  -2  18  234.11   15.44
   7   2 -18  241.13   15.64
  -7   2  18  220.56   16.14
   7   2 -17   13.10    9.86
  -7   2  17   -6.68   11.21
   7  -2 -16 1411.42   62.28
  -7  -2  16 1511.56   65.76
   7   2 -16 1434.83   62.77
  -7   2  16 1413.91   62.52
   7  -2 -15    4.58    9.27
  -7  -2  15   27.55    8.57
   7   2 -15   29.10    9.37
  -7   2  15   15.74   11.01
   7  -2 -14 1434.83   63.22
  -7  -2  14 1440.31   62.67
   7   2 -14 1439.32   62.77
  -7   2  14 1511.56   66.51
   7  -2 -13    2.99   10.06
  -7  -2  13    1.05    7.62
   7   2 -13   -0.85    8.47
  -7   2  13   -3.54    9.47
   7  -2 -12  600.34   28.95
  -7  -2  12  574.43   27.25
   7   2 -12  557.49   27.40
  -7   2  12  589.38   29.59
   7  -2 -11   11.71    8.57
  -7  -2  11   -4.58    7.97
   7   2 -11   16.49    9.62
  -7   2  11   16.54   10.06
   7  -2 -10  109.31   11.71
  -7  -2  10  102.63   10.51
   7   2 -10   97.50   11.11
  -7   2  10   85.44   11.06
   7  -2  -9   41.65    9.37
  -7  -2   9   19.68    8.32
   7   2  -9   18.73    9.02
  -7   2   9   27.35    8.77
   7  -2  -8  263.05   16.69
  -7  -2   8  287.22   16.94
   7   2  -8  287.61   17.04
  -7   2   8  303.01   18.13
   7  -2  -7   -7.82    8.07
  -7  -2   7    4.23    8.67
   7   2  -7    6.18    8.22
  -7   2   7    8.52    7.72
   7  -2  -6 1631.13   70.75
  -7  -2   6 1643.58   71.39
   7   2  -6 1528.50   66.21
  -7   2   6 1510.06   65.66
   7  -2  -5  568.45   27.65
  -7  -2   5  654.64   31.19
   7   2  -5  589.88   28.25
  -7   2   5  558.99   27.10
   7  -2  -4 2513.45  106.72
  -7  -2   4 2455.16  104.47
   7   2  -4 2388.90  101.63
  -7   2   4 2623.06  111.25
   7  -2  -3  244.12   14.45
  -7  -2   3  275.31   16.79
   7   2  -3  221.10   14.40
  -7   2   3  261.56   15.59
   7  -2  -2 3363.39  141.44
  -7  -2   2 3183.04  134.32
   7   2  -2 3299.62  139.25
  -7   2   2 3126.74  131.88
   7  -2  -1   11.36    7.32
  -7  -2   1   13.20    7.87
   7   2  -1   -4.83    9.17
  -7   2   1   10.41    7.17
   7  -2   0  238.39   14.25
  -7  -2   0  219.96   14.60
   7   2   0  235.30   15.15
  -7   2   0  262.55   15.05
   7  -2   1  210.54   12.80
  -7  -2  -1  230.07   15.05
   7   2   1  181.50   12.46
  -7   2  -1  225.49   14.15
   7  -2   2   29.29    6.88
  -7  -2  -2   35.77    9.57
   7   2   2   17.14    9.07
  -7   2  -2   29.10    8.42
   7  -2   3   83.55    7.87
  -7  -2  -3   85.44   11.01
   7   2   3   81.76    9.81
  -7   2  -3  102.38   10.16
   7  -2   4  800.62   35.77
  -7  -2  -4  793.14   36.97
   7   2   4  813.07   37.61
  -7   2  -4  829.02   37.56
   7  -2   5   17.49    7.77
  -7  -2  -5    3.94   10.56
   7   2   5   -0.05    8.72
  -7   2  -5    8.27    8.37
   7  -2   6 2026.20   86.54
  -7  -2  -6 2204.56   94.61
   7   2   6 2095.46   89.73
  -7   2  -6 2077.52   88.53
   7  -2   7  -15.99    7.22
  -7  -2  -7   -8.92   11.36
   7   2   7   10.11    9.52
  -7   2  -7    1.05    9.17
   7  -2   8 1675.47   71.64
  -7  -2  -8 1673.97   73.34
   7   2   8 1813.47   78.72
  -7   2  -8 1662.51   71.69
   7  -2   9   12.21    8.22
  -7  -2  -9    3.64   12.11
   7   2   9    6.18   10.36
  -7   2  -9   21.22    9.37
   7  -2  10  280.34   17.19
  -7  -2 -10  272.17   17.44
   7   2  10  230.82   15.64
  -7   2 -10  264.20   16.74
   7  -2  11   -8.77    8.77
   7  -2  11   12.60    8.82
  -7  -2 -11    2.34   10.21
   7   2  11   -3.64    9.67
   7   2  11   -3.84   10.11
  -7   2 -11    0.00   10.06
   7  -2  12   23.86    9.81
   7  -2  12   24.96    9.37
  -7  -2 -12   14.65   11.86
   7   2  12   21.22   10.91
   7   2  12   22.37   10.26
  -7   2 -12   24.76   10.46
   7  -2  13  248.31   16.09
   7  -2  13  207.50   15.49
  -7  -2 -13  202.67   15.44
   7   2  13  239.44   16.34
   7   2  13  218.66   16.64
  -7   2 -13  224.04   15.84
   7  -2  14   51.51   10.61
   7  -2  14   70.05   10.66
  -7  -2 -14   71.59   12.16
   7   2  14   47.43   11.01
   7   2  14   28.90   11.41
  -7   2 -14   64.02   12.26
   7  -2  15  109.21   12.85
   7  -2  15  140.10   13.45
  -7  -2 -15  130.23   14.35
   7   2  15  126.99   13.30
   7   2  15  119.77   14.35
   7  -2  16  427.31   22.62
   7  -2  16  479.37   25.06
   7   2  16  453.47   24.21
   7   2  16  516.64   26.85
   7  -2  17   26.85   12.01
   7  -2  17   16.29   13.65
   7   2  17   10.26   11.61
   7   2  17  -11.71   11.36
   7  -2  18  438.17   24.36
   7  -2  18  415.60   24.96
   7   2  18  386.91   22.07
   7   2  18  390.79   22.77
   7  -2  19   -2.34   15.34
   7  -2  19  -18.58   17.54
   7   2  19    0.15   12.80
   7   2  19    5.33   11.71
   7  -3 -21    0.20   13.20
  -7  -3  21   -5.98   12.36
  -7  -3  21    5.28   12.36
   7   3 -21    2.64   11.01
  -7   3  21    8.82   12.01
  -7   3  21   15.79   13.55
   7  -3 -20   39.61   13.25
  -7  -3  20   62.67   11.91
   7   3 -20   70.99   11.71
  -7   3  20   49.32   11.86
  -7   3  20   57.14   13.30
   7  -3 -19   69.35   13.55
  -7  -3  19   67.86   11.21
   7   3 -19   64.87   11.11
  -7   3  19   70.99   13.25
  -7   3  19   59.93   12.85
   7  -3 -18   19.18   10.71
  -7  -3  18   23.42    9.62
   7   3 -18   35.57   10.81
  -7   3  18    0.60   10.81
  -7   3  18   27.40   10.76
   7  -3 -17  440.26   24.01
  -7  -3  17  423.08   21.92
   7   3 -17  491.63   24.46
  -7   3  17  432.29   24.16
   7  -3 -16   12.85   11.51
  -7  -3  16   25.16    8.97
   7   3 -16   13.40    9.17
  -7   3  16   25.16   10.86
   7  -3 -15 1219.61   54.50
  -7  -3  15 1143.88   50.57
   7   3 -15 1202.67   53.21
  -7   3  15 1180.75   53.06
   7  -3 -14   -3.54   10.06
  -7  -3  14    1.10    7.72
   7   3 -14  -12.21    8.67
  -7   3  14   -8.87   10.06
   7  -3 -13 1260.46   56.05
  -7  -3  13 1408.93   61.48
   7   3 -13 1236.55   54.35
  -7   3  13 1477.68   65.12
   7  -3 -12   40.35   10.46
  -7  -3  12   53.51    9.07
   7   3 -12   35.22    9.07
  -7   3  12   57.69   10.66
   7  -3 -11  238.04   15.39
  -7  -3  11  264.75   15.54
   7   3 -11  251.74   15.20
  -7   3  11  265.79   17.39
   7  -3 -10  345.71   19.88
  -7  -3  10  385.51   20.83
   7   3 -10  353.33   19.63
  -7   3  10  376.54   21.22
   7  -3  -9   60.73   11.46
  -7  -3   9   51.51    9.91
   7   3  -9   37.56    9.27
  -7   3   9   50.27   10.46
   7  -3  -8   45.09    9.42
  -7  -3   8   36.17    9.17
   7   3  -8   42.80    9.32
  -7   3   8   44.39    9.91
   7  -3  -7  551.51   27.00
  -7  -3   7  552.51   26.90
   7   3  -7  567.96   27.30
  -7   3   7  529.59   26.45
   7  -3  -6  134.47   11.86
  -7  -3   6  148.07   11.91
   7   3  -6  164.36   12.60
  -7   3   6  163.41   12.70
   7  -3  -5 2077.52   88.58
  -7  -3   5 1951.97   83.90
   7   3  -5 2043.64   87.53
  -7   3   5 1987.84   85.29
   7  -3  -4  285.72   16.74
  -7  -3   4  282.18   16.84
   7   3  -4  280.14   16.09
  -7   3   4  270.68   15.49
   7  -3  -3 3389.80  143.13
  -7  -3   3 3101.83  131.28
   7   3  -3 3063.97  129.38
  -7   3   3 3244.82  136.76
   7  -3  -2  134.47   11.11
  -7  -3   2  133.52   12.16
   7   3  -2  153.95   12.75
  -7   3   2  135.61   11.01
   7  -3  -1 1024.31   45.04
  -7  -3   1 1122.46   50.07
   7   3  -1  944.60   42.80
  -7   3   1  948.09   42.50
   7  -3   0   55.85    7.17
  -7  -3   0   61.63    9.67
   7   3   0   63.77    8.92
  -7   3   0   56.99    8.67
   7  -3   1   78.32    7.67
  -7  -3  -1   69.10   10.91
   7   3   1   83.75   10.91
  -7   3  -1   76.72    8.92
   7  -3   2   64.72    7.77
  -7  -3  -2   71.14   10.71
   7   3   2   49.17   10.16
  -7   3  -2   57.94    8.77
   7  -3   3  477.83   22.67
  -7  -3  -3  477.88   25.41
   7   3   3  473.99   23.91
  -7   3  -3  515.15   24.56
   7  -3   4   37.32    6.97
  -7  -3  -4   18.83   10.71
   7   3   4   36.22    9.22
  -7   3  -4   34.58    8.37
   7  -3   5 1875.75   79.61
  -7  -3  -5 1789.06   77.97
   7   3   5 1928.06   83.40
  -7   3  -5 1928.56   82.05
   7  -3   6   -4.48    5.98
  -7  -3  -6  -20.63   11.46
   7   3   6    2.29    8.92
  -7   3  -6    7.67    8.22
   7  -3   7 1340.17   57.64
  -7  -3  -7 1313.77   58.84
   7   3   7 1355.62   60.08
  -7   3  -7 1362.59   59.19
   7   3   8   18.73    8.77
  -7   3  -8    8.97    8.32
   7  -3   9  641.19   29.94
  -7  -3  -9  641.69   31.98
   7   3   9  638.20   31.34
  -7   3  -9  619.27   29.19
   7  -3  10   -4.18    7.07
   7  -3  10    0.85    8.42
  -7  -3 -10   19.93   13.00
   7   3  10   19.68   12.26
  -7   3 -10   20.73    9.32
   7  -3  11  255.88   15.25
   7  -3  11  219.01   13.95
  -7  -3 -11  213.78   16.09
   7   3  11  247.46   17.04
   7   3  11  223.94   16.99
  -7   3 -11  246.06   15.59
   7  -3  12  -14.40   10.21
   7  -3  12   13.30    9.02
  -7  -3 -12    8.67   12.41
   7   3  12   26.36   11.06
   7   3  12   -1.49   13.10
  -7   3 -12   23.86   10.56
   7  -3  13   21.82   11.11
   7  -3  13   25.36    9.12
  -7  -3 -13   10.86   13.30
   7   3  13   42.80   13.25
   7   3  13   20.48   11.26
  -7   3 -13    5.13   10.76
   7  -3  14   53.66   11.11
   7  -3  14   57.69   11.06
  -7  -3 -14   36.62   12.11
   7   3  14   57.19   13.10
   7   3  14   39.31   12.01
   7  -3  15  358.56   20.48
   7  -3  15  359.46   20.73
  -7  -3 -15  373.60   21.67
   7   3  15  352.83   20.87
   7   3  15  374.10   21.47
   7  -3  16   12.26   11.96
   7  -3  16   12.06   12.70
  -7  -3 -16   13.85   11.71
   7   3  16   42.90   11.86
   7   3  16   40.65   10.91
   7  -3  17  551.51   29.00
   7  -3  17  543.54   28.10
   7   3  17  534.08   27.25
   7   3  17  588.38   29.49
   7  -3  18  -10.11   16.29
   7  -3  18   11.76   15.54
   7   3  18  -25.81   12.26
   7   3  18   -1.20   10.91
   7  -3  19  246.46   22.47
   7  -3  19  245.81   20.68
   7   3  19  232.81   18.38
   7   3  19  279.69   18.93
   7  -4 -21   54.20   15.44
  -7  -4  21   73.24   13.85
  -7  -4  21   42.45   14.15
   7   4 -21   35.82   13.30
  -7   4  21   41.25   11.91
  -7   4  21   36.07   12.95
   7  -4 -20   46.33   13.80
  -7  -4  20   23.57   11.71
   7   4 -20   19.48   12.01
  -7   4  20   50.37   12.36
  -7   4  20   28.85   12.16
   7  -4 -19   26.31   13.10
  -7  -4  19   58.24   11.61
   7   4 -19   57.04   11.36
  -7   4  19   46.43   13.00
  -7   4  19   66.71   13.45
   7  -4 -18  285.47   19.28
  -7  -4  18  274.11   16.49
   7   4 -18  308.19   18.18
  -7   4  18  272.27   18.18
  -7   4  18  295.54   19.03
   7  -4 -17   47.88   12.21
  -7  -4  17   31.94   10.01
   7   4 -17   35.82   10.11
  -7   4  17   51.22   11.76
  -7   4  17   39.26   11.91
   7  -4 -16  710.44   33.93
  -7  -4  16  737.35   33.83
   7   4 -16  772.22   35.57
  -7   4  16  725.89   34.23
  -7   4  16  663.11   32.38
   7  -4 -15   15.89   11.36
  -7  -4  15   -8.47    8.27
   7   4 -15    8.22    8.92
  -7   4  15  -16.09   10.51
   7  -4 -14 1769.13   76.87
  -7  -4  14 1634.12   70.40
   7   4 -14 1704.86   73.49
  -7   4  14 1688.42   73.34
   7  -4 -13    2.64    8.67
  -7  -4  13   -1.74    7.82
   7   4 -13   -9.52    8.42
  -7   4  13   10.41   10.01
   7  -4 -12  917.20   42.15
  -7  -4  12  861.40   39.01
   7   4 -12  925.17   41.95
  -7   4  12  905.74   41.55
   7  -4 -11  178.96   14.40
  -7  -4  11  210.49   13.25
   7   4 -11  206.51   13.70
  -7   4  11  204.56   14.85
   7  -4 -10  221.15   15.15
  -7  -4  10  198.29   12.65
   7   4 -10  200.48   13.70
  -7   4  10  197.09   15.25
   7  -4  -9  418.39   21.57
  -7  -4   9  434.09   21.87
   7   4  -9  451.42   23.42
  -7   4   9  386.26   21.52
   7  -4  -8  316.61   18.38
  -7  -4   8  356.22   19.18
   7  -4  -7   75.23    9.86
  -7  -4   7   84.84   10.66
   7   4  -7   84.25   10.21
  -7   4   7   83.80   10.86
   7  -4  -6 1328.22   58.84
  -7  -4   6 1269.93   56.05
   7   4  -6 1309.29   57.79
  -7   4   6 1214.13   53.76
   7  -4  -5  137.46   12.21
  -7  -4   5  154.05   12.70
   7   4  -5  164.66   12.70
  -7   4   5  127.24   11.26
   7  -4  -4 2677.36  113.04
  -7  -4   4 2617.08  111.20
   7   4  -4 2636.51  112.10
  -7   4   4 2694.30  114.19
   7  -4  -3   60.98    8.77
  -7  -4   3   69.20   10.21
   7   4  -3   52.61   10.01
  -7   4   3   54.40    8.57
   7  -4  -2 3214.43  135.06
  -7  -4   2 3119.77  131.83
   7   4  -2 3069.95  129.88
  -7   4   2 2975.29  125.65
   7  -4  -1  104.57    9.52
  -7  -4   1  103.28   11.56
   7   4  -1   87.29   10.66
  -7   4   1   83.60    9.32
   7  -4   0  343.61   17.79
  -7  -4   0  333.75   19.53
   7   4   0  364.94   20.23
  -7   4   0  370.42   19.13
   7  -4   1   51.61    8.07
  -7  -4  -1   49.67   11.51
   7   4   1   35.97   10.26
  -7   4  -1   42.50    7.57
   7  -4   2   56.65    7.47
  -7  -4  -2   61.93   12.36
   7  -4   3  232.46   13.05
  -7  -4  -3  215.27   16.19
   7   4   3  223.10   15.39
  -7   4  -3  217.87   13.25
   7  -4   4  412.81   19.58
  -7  -4  -4  429.11   24.11
   7   4   4  389.95   21.57
  -7   4  -4  416.50   20.73
   7  -4   5    7.12    6.08
  -7  -4  -5   25.86   10.91
   7   4   5   19.23    9.57
  -7   4  -5    3.39    7.22
   7  -4   6 1260.46   54.16
  -7  -4  -6 1178.26   53.36
   7   4   6 1321.24   58.39
  -7   4  -6 1352.13   58.19
   7  -4   7   51.02    7.22
  -7  -4  -7   74.68   13.00
   7   4   7   67.36   12.80
  -7   4  -7   57.94    9.57
   7  -4   8  679.55   30.79
  -7  -4  -8  680.05   34.08
   7   4   8  720.41   35.32
  -7   4  -8  682.54   31.39
   7  -4   9   53.91    7.27
  -7  -4  -9   44.44   13.55
   7   4   9   71.34   12.46
  -7   4  -9   80.56    9.72
   7  -4  10  212.24   12.80
   7  -4  10  193.25   13.20
  -7  -4 -10  208.95   16.74
   7   4  10  157.03   14.15
   7   4  10  177.91   15.34
  -7   4 -10  191.66   13.50
   7  -4  11   16.54    7.72
   7  -4  11   25.56    9.02
  -7  -4 -11    0.95   12.06
   7   4  11   19.53   11.36
   7   4  11   13.20   10.51
  -7   4 -11   13.80    8.92
   7  -4  12   28.25    8.67
   7  -4  12   40.01   10.21
  -7  -4 -12   21.97   12.70
   7   4  12    5.43   11.86
   7   4  12   20.08   11.91
  -7   4 -12   18.58    9.91
   7  -4  13   96.25   11.06
   7  -4  13   77.07    9.86
  -7  -4 -13   78.47   13.40
   7   4  13   70.15   13.55
   7   4  13   85.04   13.80
   7  -4  14  106.37   10.91
   7  -4  14  129.09   12.60
  -7  -4 -14  115.43   14.00
   7   4  14  127.54   14.50
   7   4  14  125.10   15.29
   7  -4  15   -4.38   12.11
   7  -4  15   -6.38    9.96
  -7  -4 -15  -33.18   13.40
   7   4  15   11.51   13.30
   7   4  15  -14.05   13.00
   7  -4  16  319.40   20.83
   7  -4  16  317.66   19.23
  -7  -4 -16  330.91   22.37
   7   4  16  354.32   21.57
   7   4  16  332.10   20.38
   7  -4  17   19.08   13.35
   7  -4  17   12.95   16.69
   7   4  17   19.73   13.30
   7   4  17   19.18   12.95
   7  -4  18  364.04   25.76
   7  -4  18  393.88   24.26
   7   4  18  446.94   24.21
   7   4  18  387.55   21.87
   7  -5 -20  119.27   15.25
  -7  -5  20  126.59   13.70
   7   5 -20  130.73   14.65
  -7   5  20   97.00   12.46
  -7   5  20   76.42   12.95
   7  -5 -19   83.20   14.00
  -7  -5  19   96.65   12.55
   7   5 -19   81.31   12.36
  -7   5  19  116.08   14.55
  -7   5  19   88.43   14.15
   7  -5 -18   26.01   12.36
  -7  -5  18   21.42   10.16
   7   5 -18   14.45   10.61
  -7   5  18   20.58   11.46
  -7   5  18   32.28   12.50
   7  -5 -17  489.99   26.11
  -7  -5  17  487.74   24.26
   7   5 -17  513.15   25.61
  -7   5  17  476.58   25.51
  -7   5  17  478.28   24.81
   7  -5 -16    7.67   11.36
  -7  -5  16    2.14    8.72
   7   5 -16  -17.19    8.92
  -7   5  16   -3.09   10.61
  -7   5  16    5.33   10.26
   7  -5 -15  867.88   40.40
  -7  -5  15  890.29   39.91
   7   5 -15  862.89   39.26
[truncated: 314,092 more chars]
