# Supplementary material for: A Series of Novel Pentagonal-Bipyramidal Erbium(III) Complexes with Acyclic Chelating N3O2 Schiff-Base Ligands: Synthesis, Structure, and Magnetism
Source: Molecules. 2021 Nov 16;26(22):6908. doi: 10.3390/molecules26226908 (PMC8622354; doi:10.3390/molecules26226908)
Supplement: Supplementary file 1 [file molecules-26-06908-s001.zip › Supplementary files/5.cif]

 
data_Er
# start Validation Reply Form

_vrf_PLAT214_360_410_global
;
PROBLEM: Atom C2C       (Anion/Solvent) ADP max/min Ratio        6.6 prolat
PROBLEM: Short Intra H...H Contact  H2C1     ..H2C1     .       1.59 Ang.  
PROBLEM: Short  C(sp3)-C(sp3) Bond  C1C      - C2C      .       1.32 Ang.  
RESPONSE: the C2C atom in the Et3NH+ counter cation which is at the crystallographically special position bears large thermal disorder.
Upon refinement with riding H atoms on C2C results in short intra H...H contacts 
;
# end Validation Reply Form

_audit_creation_method            'SHELXL-2018/3'
_shelx_SHELXL_version_number      '2018/3'
_chemical_name_systematic         ?
_chemical_name_common             ?
_chemical_melting_point           ?
_chemical_formula_moiety          
 'C23 H19 Cl2 Er N5 O4, C6 H16 N'
_chemical_formula_sum
 'C29 H35 Cl2 Er N6 O4' 
_chemical_formula_weight          769.79

loop_
 _atom_type_symbol
 _atom_type_description
 _atom_type_scat_dispersion_real
 _atom_type_scat_dispersion_imag
 _atom_type_scat_source
 'C'  'C'   0.0033   0.0016
 'International Tables Vol C Tables 4.2.6.8 and 6.1.1.4'
 'H'  'H'   0.0000   0.0000
 'International Tables Vol C Tables 4.2.6.8 and 6.1.1.4'
 'N'  'N'   0.0061   0.0033
 'International Tables Vol C Tables 4.2.6.8 and 6.1.1.4'
 'O'  'O'   0.0106   0.0060
 'International Tables Vol C Tables 4.2.6.8 and 6.1.1.4'
 'Cl'  'Cl'   0.1484   0.1585
 'International Tables Vol C Tables 4.2.6.8 and 6.1.1.4'
 'Er'  'Er'  -0.2586   4.9576
 'International Tables Vol C Tables 4.2.6.8 and 6.1.1.4'
 
_space_group_crystal_system       orthorhombic
_space_group_IT_number            36
_space_group_name_H-M_alt         'C m c 21'
_space_group_name_Hall            'C 2c -2'
 
_shelx_space_group_comment
;
The symmetry employed for this shelxl refinement is uniquely defined
by the following loop, which should always be used as a source of
symmetry information in preference to the above space-group names.
They are only intended as comments.
;
 
loop_
 _space_group_symop_operation_xyz
 'x, y, z'
 '-x, -y, z+1/2'
 'x, -y, z+1/2'
 '-x, y, z'
 'x+1/2, y+1/2, z'
 '-x+1/2, -y+1/2, z+1/2'
 'x+1/2, -y+1/2, z+1/2'
 '-x+1/2, y+1/2, z'
 
_cell_length_a                    18.7290(5)
_cell_length_b                    14.8702(4)
_cell_length_c                    11.1918(4)
_cell_angle_alpha                 90
_cell_angle_beta                  90
_cell_angle_gamma                 90
_cell_volume                      3116.95(16)
_cell_formula_units_Z             4
_cell_measurement_temperature   100(1) 
_cell_measurement_reflns_used   2947
_cell_measurement_theta_min     2.8304
_cell_measurement_theta_max     31.4645
 
_exptl_crystal_description       'rectangular blocks'
_exptl_crystal_colour            'yellow'
_exptl_crystal_density_meas       ?
_exptl_crystal_density_method     ?
_exptl_crystal_density_diffrn     1.640         
_exptl_crystal_F_000              1540
_exptl_transmission_factor_min    ?
_exptl_transmission_factor_max    ?
_exptl_crystal_size_max           0.25
_exptl_crystal_size_mid           0.1 
_exptl_crystal_size_min           0.1
_exptl_absorpt_coefficient_mu     2.908
_shelx_estimated_absorpt_T_min    ?
_shelx_estimated_absorpt_T_max    ?
_exptl_absorpt_correction_T_min                   0.95949
_exptl_absorpt_correction_T_max                   1.00000
_exptl_absorpt_correction_type            'multi-scan'
_exptl_absorpt_process_details
;
CrysAlisPro, Agilent Technologies,
Version 1.171.36.20 (release 27-06-2012 CrysAlis171 .NET)
(compiled Jul 11 2012,15:38:31)
Empirical absorption correction using spherical harmonics,
 implemented in SCALE3 ABSPACK scaling algorithm.
;
_diffrn_ambient_temperature       100(1)
_diffrn_radiation_wavelength      0.71073
_diffrn_radiation_type            MoK\a
_diffrn_source                    'Enhance (Mo) X-ray Source'
_diffrn_measurement_device_type   'Xcalibur, Eos'
_diffrn_measurement_method        '\w scans'
_diffrn_detector_area_resol_mean  ?
_diffrn_reflns_number             5094
_diffrn_reflns_av_unetI/netI      0.0668
_diffrn_reflns_av_R_equivalents   0.0327
_diffrn_reflns_limit_h_min        -23
_diffrn_reflns_limit_h_max        25
_diffrn_reflns_limit_k_min        -20
_diffrn_reflns_limit_k_max        16
_diffrn_reflns_limit_l_min        -13
_diffrn_reflns_limit_l_max        15
_diffrn_reflns_theta_min          3.290
_diffrn_reflns_theta_max          29.065
_diffrn_reflns_theta_full         25.242
_diffrn_measured_fraction_theta_max   0.997
_diffrn_measured_fraction_theta_full  0.996
_diffrn_reflns_Laue_measured_fraction_max    0.997
_diffrn_reflns_Laue_measured_fraction_full   0.996
_diffrn_reflns_point_group_measured_fraction_max   0.795
_diffrn_reflns_point_group_measured_fraction_full  0.822
_reflns_number_total              3427
_reflns_number_gt                 3085
_reflns_threshold_expression      'I > 2\s(I)'
_reflns_Friedel_coverage          0.518
_reflns_Friedel_fraction_max      0.571
_reflns_Friedel_fraction_full     0.626
 
_reflns_special_details
;
 Reflections were merged by SHELXL according to the crystal
 class for the calculation of statistics and refinement.
 
 _reflns_Friedel_fraction is defined as the number of unique
 Friedel pairs measured divided by the number that would be
 possible theoretically, ignoring centric projections and
 systematic absences.
;
 
_computing_data_collection        ?
_computing_cell_refinement        ?
_computing_data_reduction         ?
_computing_structure_solution    'SIR92 (Giacovazzo et al, 1992)'
_computing_structure_refinement 'SHELXL-2018/3 (Sheldrick, 2018)'
_computing_molecular_graphics     ?
_computing_publication_material   ?
_refine_special_details           ?
_refine_ls_structure_factor_coef  Fsqd
_refine_ls_matrix_type            full
_refine_ls_weighting_scheme       calc
_refine_ls_weighting_details
'w=1/[\s^2^(Fo^2^)+(0.0132P)^2^] where P=(Fo^2^+2Fc^2^)/3'
_atom_sites_solution_primary      'direct methods'
_atom_sites_solution_secondary    'diff Fourier map'
_atom_sites_solution_hydrogens    mixed
_refine_ls_hydrogen_treatment     mixed
_refine_ls_extinction_method      none
_refine_ls_extinction_coef        .
_refine_ls_abs_structure_details
;
 Flack x determined using 956 quotients [(I+)-(I-)]/[(I+)+(I-)]
 (Parsons, Flack and Wagner, Acta Cryst. B69 (2013) 249-259).
;
_refine_ls_abs_structure_Flack    -0.035(11)
_chemical_absolute_configuration  ?
_refine_ls_number_reflns          3427
_refine_ls_number_parameters      212
_refine_ls_number_restraints      1
_refine_ls_R_factor_all           0.0398
_refine_ls_R_factor_gt            0.0331
_refine_ls_wR_factor_ref          0.0551
_refine_ls_wR_factor_gt           0.0533
_refine_ls_goodness_of_fit_ref    0.960
_refine_ls_restrained_S_all       0.960
_refine_ls_shift/su_max           0.001
_refine_ls_shift/su_mean          0.000
 
loop_
 _atom_site_label
 _atom_site_type_symbol
 _atom_site_fract_x
 _atom_site_fract_y
 _atom_site_fract_z
 _atom_site_U_iso_or_equiv
 _atom_site_adp_type
 _atom_site_occupancy
 _atom_site_site_symmetry_order  
 _atom_site_calc_flag
 _atom_site_refinement_flags_posn
 _atom_site_refinement_flags_adp
 _atom_site_refinement_flags_occupancy
 _atom_site_disorder_assembly
 _atom_site_disorder_group
Er1 Er -1.000000 -0.32717(2) -0.08085(3) 0.01436(8) Uani 1 2 d S T P . .
Cl2 Cl -1.000000 -0.21827(14) 0.10707(19) 0.0219(5) Uani 1 2 d S T P . .
Cl1 Cl -1.000000 -0.39732(16) -0.29230(17) 0.0228(5) Uani 1 2 d S T P . .
N2 N -1.000000 -0.1847(5) -0.1862(6) 0.0193(16) Uani 1 2 d S T P . .
O5 O -0.9109(2) -0.4138(3) -0.0117(3) 0.0191(9) Uani 1 1 d . . . . .
N3 N -0.8240(2) -0.3208(3) -0.0954(8) 0.0205(15) Uani 1 1 d . . . . .
N1 N -0.8822(3) -0.2683(3) -0.1246(4) 0.0190(11) Uani 1 1 d . . . . .
O3 O -0.6927(2) -0.3724(3) -0.0890(7) 0.0339(11) Uani 1 1 d . . . . .
H3 H -0.726522 -0.339310 -0.104126 0.051 Uiso 1 1 calc R U . . .
C3 C -0.7879(3) -0.4570(4) 0.0032(5) 0.0180(13) Uani 1 1 d . . . . .
C8 C -0.7159(3) -0.4442(5) -0.0268(5) 0.0240(15) Uani 1 1 d . . . . .
C013 C -0.9379(4) -0.1427(5) -0.2080(5) 0.0247(15) Uani 1 1 d . . . . .
C2 C -0.8455(3) -0.3945(4) -0.0355(5) 0.0182(13) Uani 1 1 d . . . . .
C16 C -0.8720(4) -0.1943(4) -0.1838(5) 0.0219(14) Uani 1 1 d . . . . .
C19 C -0.9364(4) -0.0545(5) -0.2524(5) 0.0314(17) Uani 1 1 d . . . . .
H19 H -0.893284 -0.025620 -0.267471 0.038 Uiso 1 1 calc R U . . .
C4 C -0.8071(4) -0.5315(5) 0.0719(5) 0.0237(15) Uani 1 1 d . . . . .
H4 H -0.854642 -0.539458 0.093288 0.028 Uiso 1 1 calc R U . . .
C5 C -0.7571(4) -0.5935(5) 0.1086(6) 0.0294(16) Uani 1 1 d . . . . .
H5 H -0.770469 -0.642326 0.155444 0.035 Uiso 1 1 calc R U . . .
C7 C -0.6661(4) -0.5076(5) 0.0093(5) 0.0314(17) Uani 1 1 d . . . . .
H7 H -0.618340 -0.499779 -0.010733 0.038 Uiso 1 1 calc R U . . .
C6 C -0.6863(4) -0.5817(5) 0.0744(6) 0.0356(19) Uani 1 1 d . . . . .
H6 H -0.652352 -0.624391 0.095712 0.043 Uiso 1 1 calc R U . . .
N1C N -1.000000 -0.3133(5) 0.3625(6) 0.0201(16) Uani 1 2 d S T P . .
C15 C -0.8005(4) -0.1620(5) -0.2237(6) 0.0315(17) Uani 1 1 d . . . . .
H15A H -0.805776 -0.106093 -0.265726 0.047 Uiso 1 1 calc R U . . .
H15B H -0.770359 -0.153198 -0.155315 0.047 Uiso 1 1 calc R U . . .
H15C H -0.779345 -0.205838 -0.275742 0.047 Uiso 1 1 calc R U . . .
C20 C -1.000000 -0.0123(7) -0.2727(8) 0.035(2) Uani 1 2 d S T P . .
H20 H -1.000000 0.046467 -0.301075 0.042 Uiso 1 2 calc R U P . .
C1C C -1.1150(5) -0.3814(7) 0.2983(7) 0.057(3) Uani 1 1 d . . . . .
H1C1 H -1.148201 -0.423605 0.331847 0.085 Uiso 1 1 calc R U . . .
H1C2 H -1.138742 -0.325069 0.284628 0.085 Uiso 1 1 calc R U . . .
H1C3 H -1.097086 -0.404283 0.223936 0.085 Uiso 1 1 calc R U . . .
C4C C -0.9845(10) -0.1624(8) 0.4593(12) 0.049(6) Uani 0.5 1 d . . P A -1
H4C1 H -1.004838 -0.121688 0.516596 0.073 Uiso 0.5 1 calc R U P A -1
H4C2 H -0.936956 -0.178179 0.483696 0.073 Uiso 0.5 1 calc R U P A -1
H4C3 H -0.982846 -0.133872 0.382417 0.073 Uiso 0.5 1 calc R U P A -1
C3C C -1.0292(6) -0.2452(8) 0.4521(9) 0.024(3) Uani 0.5 1 d . . P A -1
H3C1 H -1.077378 -0.228678 0.429135 0.029 Uiso 0.5 1 calc R U P A -1
H3C2 H -1.031480 -0.272993 0.530432 0.029 Uiso 0.5 1 calc R U P A -1
C2C C -1.0613(5) -0.3691(9) 0.3735(11) 0.159(8) Uani 1 1 d . . . . .
H2C1 H -1.042445 -0.428937 0.387878 0.190 Uiso 1 1 calc R U . . .
H2C2 H -1.083558 -0.350756 0.447779 0.190 Uiso 1 1 calc R U . . .
H1N H -1.000000 -0.286(6) 0.282(7) 0.02(2) Uiso 1 2 d S . P . .
 
loop_
 _atom_site_aniso_label
 _atom_site_aniso_U_11
 _atom_site_aniso_U_22
 _atom_site_aniso_U_33
 _atom_site_aniso_U_23
 _atom_site_aniso_U_13
 _atom_site_aniso_U_12
Er1 0.01494(14) 0.01278(14) 0.01537(14) 0.0014(3) 0.000 0.000
Cl2 0.0316(12) 0.0151(10) 0.0191(10) -0.0021(9) 0.000 0.000
Cl1 0.0302(13) 0.0215(11) 0.0167(10) -0.0021(9) 0.000 0.000
N2 0.029(4) 0.010(4) 0.019(3) 0.003(3) 0.000 0.000
O5 0.017(2) 0.019(2) 0.022(2) 0.0015(18) -0.0011(18) -0.0020(19)
N3 0.018(2) 0.023(2) 0.020(4) -0.004(3) 0.000(3) -0.004(2)
N1 0.021(3) 0.019(3) 0.017(2) 0.001(2) 0.001(2) -0.004(2)
O3 0.019(2) 0.047(2) 0.035(3) 0.003(4) 0.002(4) -0.0012(19)
C3 0.017(3) 0.022(3) 0.015(3) -0.003(3) -0.003(3) 0.002(3)
C8 0.020(3) 0.036(4) 0.016(3) -0.003(3) -0.001(3) 0.000(3)
C013 0.038(4) 0.023(3) 0.014(3) -0.001(3) 0.005(3) -0.003(3)
C2 0.017(3) 0.020(3) 0.018(3) -0.007(3) -0.003(2) -0.002(3)
C16 0.027(4) 0.021(3) 0.017(3) -0.004(3) 0.003(3) -0.002(3)
C19 0.050(5) 0.018(3) 0.026(3) 0.007(3) 0.007(3) -0.011(4)
C4 0.022(3) 0.030(4) 0.019(3) 0.000(3) -0.003(3) 0.000(3)
C5 0.024(4) 0.032(4) 0.032(3) 0.001(3) -0.010(3) 0.000(3)
C7 0.014(3) 0.051(5) 0.029(3) -0.013(4) -0.001(3) 0.006(3)
C6 0.030(4) 0.043(5) 0.034(4) -0.005(4) -0.007(3) 0.020(4)
N1C 0.023(4) 0.016(4) 0.022(4) -0.001(3) 0.000 0.000
C15 0.035(4) 0.026(4) 0.034(4) 0.005(3) 0.017(3) -0.005(3)
C20 0.048(7) 0.017(5) 0.039(5) 0.008(5) 0.000 0.000
C1C 0.052(6) 0.078(7) 0.041(4) 0.008(5) -0.001(4) -0.037(6)
C4C 0.048(18) 0.033(7) 0.065(10) -0.032(7) -0.004(8) -0.001(8)
C3C 0.025(6) 0.026(6) 0.021(7) 0.001(5) 0.008(5) 0.008(5)
C2C 0.081(7) 0.214(14) 0.181(16) 0.165(13) -0.094(9) -0.120(9)
 
_geom_special_details
;
 All esds (except the esd in the dihedral angle between two l.s. planes)
 are estimated using the full covariance matrix.  The cell esds are taken
 into account individually in the estimation of esds in distances, angles
 and torsion angles; correlations between esds in cell parameters are only
 used when they are defined by crystal symmetry.  An approximate (isotropic)
 treatment of cell esds is used for estimating esds involving l.s. planes.
;
 
loop_
 _geom_bond_atom_site_label_1
 _geom_bond_atom_site_label_2
 _geom_bond_distance
 _geom_bond_site_symmetry_2
 _geom_bond_publ_flag
Er1 O5 2.246(4) 4_355 ?
Er1 O5 2.246(4) . ?
Er1 N1 2.425(5) 4_355 ?
Er1 N1 2.425(5) . ?
Er1 N2 2.424(7) . ?
Er1 Cl1 2.586(2) . ?
Er1 Cl2 2.654(2) . ?
N2 C013 1.343(7) 4_355 ?
N2 C013 1.343(7) . ?
O5 C2 1.285(7) . ?
N3 C2 1.347(8) . ?
N3 N1 1.380(7) . ?
N1 C16 1.298(7) . ?
O3 C8 1.347(8) . ?
O3 H3 0.8200 . ?
C3 C4 1.395(8) . ?
C3 C8 1.403(8) . ?
C3 C2 1.488(8) . ?
C8 C7 1.385(9) . ?
C013 C19 1.402(9) . ?
C013 C16 1.478(9) . ?
C16 C15 1.490(9) . ?
C19 C20 1.366(8) . ?
C19 H19 0.9300 . ?
C4 C5 1.376(9) . ?
C4 H4 0.9300 . ?
C5 C6 1.392(10) . ?
C5 H5 0.9300 . ?
C7 C6 1.374(10) . ?
C7 H7 0.9300 . ?
C6 H6 0.9300 . ?
N1C C2C 1.422(9) . ?
N1C C2C 1.422(9) 4_355 ?
N1C C3C 1.526(11) . ?
N1C H1N 0.99(8) . ?
C15 H15A 0.9600 . ?
C15 H15B 0.9600 . ?
C15 H15C 0.9600 . ?
C20 H20 0.9300 . ?
C1C C2C 1.324(11) . ?
C1C H1C1 0.9600 . ?
C1C H1C2 0.9600 . ?
C1C H1C3 0.9600 . ?
C4C C3C 1.492(17) . ?
C4C H4C1 0.9600 . ?
C4C H4C2 0.9600 . ?
C4C H4C3 0.9600 . ?
C3C H3C1 0.9700 . ?
C3C H3C2 0.9700 . ?
C2C H2C1 0.9700 . ?
C2C H2C2 0.9700 . ?
 
loop_
 _geom_angle_atom_site_label_1
 _geom_angle_atom_site_label_2
 _geom_angle_atom_site_label_3
 _geom_angle
 _geom_angle_site_symmetry_1
 _geom_angle_site_symmetry_3
 _geom_angle_publ_flag
O5 Er1 O5 96.0(2) 4_355 . ?
O5 Er1 N1 66.45(16) 4_355 4_355 ?
O5 Er1 N1 162.44(15) . 4_355 ?
O5 Er1 N1 162.44(15) 4_355 . ?
O5 Er1 N1 66.45(16) . . ?
N1 Er1 N1 131.1(2) 4_355 . ?
O5 Er1 N2 131.97(10) 4_355 . ?
O5 Er1 N2 131.97(10) . . ?
N1 Er1 N2 65.54(12) 4_355 . ?
N1 Er1 N2 65.54(12) . . ?
O5 Er1 Cl1 94.81(11) 4_355 . ?
O5 Er1 Cl1 94.81(11) . . ?
N1 Er1 Cl1 87.76(11) 4_355 . ?
N1 Er1 Cl1 87.76(11) . . ?
N2 Er1 Cl1 84.70(17) . . ?
O5 Er1 Cl2 94.41(11) 4_355 . ?
O5 Er1 Cl2 94.42(11) . . ?
N1 Er1 Cl2 86.54(11) 4_355 . ?
N1 Er1 Cl2 86.54(11) . . ?
N2 Er1 Cl2 81.50(18) . . ?
Cl1 Er1 Cl2 166.19(7) . . ?
C013 N2 C013 120.1(8) 4_355 . ?
C013 N2 Er1 119.7(4) 4_355 . ?
C013 N2 Er1 119.7(4) . . ?
C2 O5 Er1 120.6(4) . . ?
C2 N3 N1 110.0(5) . . ?
C16 N1 N3 119.0(6) . . ?
C16 N1 Er1 122.9(4) . . ?
N3 N1 Er1 117.8(3) . . ?
C8 O3 H3 109.5 . . ?
C4 C3 C8 119.1(6) . . ?
C4 C3 C2 118.0(6) . . ?
C8 C3 C2 122.8(6) . . ?
O3 C8 C7 118.2(6) . . ?
O3 C8 C3 122.8(6) . . ?
C7 C8 C3 119.0(7) . . ?
N2 C013 C19 121.1(7) . . ?
N2 C013 C16 116.7(6) . . ?
C19 C013 C16 122.2(6) . . ?
O5 C2 N3 124.8(6) . . ?
O5 C2 C3 119.4(5) . . ?
N3 C2 C3 115.8(5) . . ?
N1 C16 C013 114.2(6) . . ?
N1 C16 C15 123.9(6) . . ?
C013 C16 C15 121.9(6) . . ?
C20 C19 C013 118.1(7) . . ?
C20 C19 H19 120.9 . . ?
C013 C19 H19 120.9 . . ?
C5 C4 C3 121.4(6) . . ?
C5 C4 H4 119.3 . . ?
C3 C4 H4 119.3 . . ?
C4 C5 C6 118.8(7) . . ?
C4 C5 H5 120.6 . . ?
C6 C5 H5 120.6 . . ?
C6 C7 C8 121.0(7) . . ?
C6 C7 H7 119.5 . . ?
C8 C7 H7 119.5 . . ?
C7 C6 C5 120.6(7) . . ?
C7 C6 H6 119.7 . . ?
C5 C6 H6 119.7 . . ?
C2C N1C C2C 107.6(12) . 4_355 ?
C2C N1C C3C 92.4(8) . . ?
C2C N1C C3C 128.3(9) 4_355 . ?
C2C N1C H1N 109(3) . . ?
C2C N1C H1N 109(3) 4_355 . ?
C3C N1C H1N 109(5) . . ?
C16 C15 H15A 109.5 . . ?
C16 C15 H15B 109.5 . . ?
H15A C15 H15B 109.5 . . ?
C16 C15 H15C 109.5 . . ?
H15A C15 H15C 109.5 . . ?
H15B C15 H15C 109.5 . . ?
C19 C20 C19 121.5(9) . 4_355 ?
C19 C20 H20 119.3 . . ?
C19 C20 H20 119.3 4_355 . ?
C2C C1C H1C1 109.5 . . ?
C2C C1C H1C2 109.5 . . ?
H1C1 C1C H1C2 109.5 . . ?
C2C C1C H1C3 109.5 . . ?
H1C1 C1C H1C3 109.5 . . ?
H1C2 C1C H1C3 109.5 . . ?
C3C C4C H4C1 109.5 . . ?
C3C C4C H4C2 109.5 . . ?
H4C1 C4C H4C2 109.5 . . ?
C3C C4C H4C3 109.5 . . ?
H4C1 C4C H4C3 109.5 . . ?
H4C2 C4C H4C3 109.5 . . ?
C4C C3C N1C 112.5(9) . . ?
C4C C3C H3C1 109.1 . . ?
N1C C3C H3C1 109.1 . . ?
C4C C3C H3C2 109.1 . . ?
N1C C3C H3C2 109.1 . . ?
H3C1 C3C H3C2 107.8 . . ?
C1C C2C N1C 129.7(9) . . ?
C1C C2C H2C1 104.9 . . ?
N1C C2C H2C1 104.9 . . ?
C1C C2C H2C2 104.9 . . ?
N1C C2C H2C2 104.9 . . ?
H2C1 C2C H2C2 105.8 . . ?
 
_refine_diff_density_max    1.649
_refine_diff_density_min   -1.075
_refine_diff_density_rms    0.121

_shelx_res_file
;
TITL Ko836_100 in Cmc2(1)
    shelx.res
    created by SHELXL-2018/3 at 15:30:41 on 31-Oct-2021
REM Cmc2(1) (#36, found as Ccm2(1) in ba-c setting)
CELL 0.71073  18.729042  14.870185  11.191754  90.0000  90.0000  90.0000
ZERR    4.00   0.000510   0.000425   0.000375   0.0000   0.0000   0.0000
LATT -7
SYMM -x,-y, z+1/2
SYMM  x,-y, z+1/2
SYMM -x, y, z
SFAC C H N O Cl Er
UNIT 124 160 24 16 8 4
OMIT -2 58.14
MERG    2
L.S.   18
acta
BOND   $H
FMAP   2
PLAN    25
WGHT    0.013200
FVAR       0.97294   0.50000
ER1   6   -1.000000   -0.327171   -0.080853    10.50000    0.01494    0.01278 =
         0.01537    0.00138    0.00000    0.00000
CL2   5   -1.000000   -0.218273    0.107067    10.50000    0.03156    0.01513 =
         0.01910   -0.00205    0.00000    0.00000
CL1   5   -1.000000   -0.397316   -0.292303    10.50000    0.03018    0.02154 =
         0.01674   -0.00207    0.00000    0.00000
N2    3   -1.000000   -0.184719   -0.186157    10.50000    0.02902    0.01018 =
         0.01855    0.00344    0.00000    0.00000
O5    4   -0.910875   -0.413808   -0.011722    11.00000    0.01662    0.01857 =
         0.02223    0.00153   -0.00110   -0.00197
N3    3   -0.823982   -0.320816   -0.095395    11.00000    0.01784    0.02349 =
         0.02016   -0.00377   -0.00033   -0.00427
N1    3   -0.882161   -0.268253   -0.124631    11.00000    0.02089    0.01851 =
         0.01749    0.00085    0.00063   -0.00380
O3    4   -0.692694   -0.372414   -0.088993    11.00000    0.01940    0.04721 =
         0.03521    0.00267    0.00219   -0.00119
AFIX  83
H3    2   -0.726522   -0.339310   -0.104126    11.00000   -1.50000
AFIX   0
C3    1   -0.787943   -0.457033    0.003222    11.00000    0.01741    0.02212 =
         0.01459   -0.00292   -0.00303    0.00155
C8    1   -0.715907   -0.444233   -0.026823    11.00000    0.01993    0.03605 =
         0.01602   -0.00347   -0.00128    0.00002
C013  1   -0.937869   -0.142703   -0.208016    11.00000    0.03770    0.02258 =
         0.01390   -0.00140    0.00521   -0.00333
C2    1   -0.845545   -0.394540   -0.035526    11.00000    0.01662    0.01999 =
         0.01805   -0.00689   -0.00264   -0.00176
C16   1   -0.871971   -0.194290   -0.183835    11.00000    0.02698    0.02133 =
         0.01727   -0.00420    0.00264   -0.00247
C19   1   -0.936374   -0.054540   -0.252353    11.00000    0.05006    0.01792 =
         0.02627    0.00691    0.00721   -0.01075
AFIX  43
H19   2   -0.893284   -0.025620   -0.267471    11.00000   -1.20000
AFIX   0
C4    1   -0.807080   -0.531509    0.071872    11.00000    0.02230    0.02987 =
         0.01895   -0.00018   -0.00310    0.00044
AFIX  43
H4    2   -0.854642   -0.539458    0.093288    11.00000   -1.20000
AFIX   0
C5    1   -0.757145   -0.593471    0.108602    11.00000    0.02403    0.03220 =
         0.03193    0.00135   -0.01034   -0.00035
AFIX  43
H5    2   -0.770469   -0.642326    0.155444    11.00000   -1.20000
AFIX   0
C7    1   -0.666130   -0.507560    0.009324    11.00000    0.01417    0.05148 =
         0.02854   -0.01324   -0.00124    0.00586
AFIX  43
H7    2   -0.618340   -0.499779   -0.010733    11.00000   -1.20000
AFIX   0
C6    1   -0.686323   -0.581697    0.074371    11.00000    0.02981    0.04332 =
         0.03357   -0.00499   -0.00738    0.02049
AFIX  43
H6    2   -0.652352   -0.624391    0.095712    11.00000   -1.20000
AFIX   0
N1C   3   -1.000000   -0.313275    0.362496    10.50000    0.02281    0.01565 =
         0.02171   -0.00089    0.00000    0.00000
C15   1   -0.800504   -0.161980   -0.223702    11.00000    0.03486    0.02555 =
         0.03408    0.00517    0.01667   -0.00467
AFIX  33
H15A  2   -0.805776   -0.106093   -0.265726    11.00000   -1.50000
H15B  2   -0.770359   -0.153198   -0.155315    11.00000   -1.50000
H15C  2   -0.779345   -0.205838   -0.275742    11.00000   -1.50000
AFIX   0
C20   1   -1.000000   -0.012320   -0.272718    10.50000    0.04750    0.01720 =
         0.03927    0.00839    0.00000    0.00000
AFIX  43
H20   2   -1.000000    0.046467   -0.301075    10.50000   -1.20000
AFIX   0
C1C   1   -1.115023   -0.381367    0.298298    11.00000    0.05208    0.07755 =
         0.04126    0.00759   -0.00056   -0.03679
AFIX  33
H1C1  2   -1.148201   -0.423605    0.331847    11.00000   -1.50000
H1C2  2   -1.138742   -0.325069    0.284628    11.00000   -1.50000
H1C3  2   -1.097086   -0.404283    0.223936    11.00000   -1.50000
AFIX   0
PART  -1
C4C   1   -0.984471   -0.162350    0.459349    10.50000    0.04831    0.03276 =
         0.06478   -0.03193   -0.00423   -0.00051
AFIX  33
H4C1  2   -1.004838   -0.121688    0.516596    10.50000   -1.50000
H4C2  2   -0.936956   -0.178179    0.483696    10.50000   -1.50000
H4C3  2   -0.982846   -0.133872    0.382417    10.50000   -1.50000
AFIX   0
C3C   1   -1.029196   -0.245215    0.452105    10.50000    0.02518    0.02593 =
         0.02150    0.00110    0.00752    0.00792
AFIX  23
H3C1  2   -1.077378   -0.228678    0.429135    10.50000   -1.20000
H3C2  2   -1.031480   -0.272993    0.530432    10.50000   -1.20000
AFIX   0
PART   0
C2C   1   -1.061278   -0.369150    0.373453    11.00000    0.08105    0.21360 =
         0.18128    0.16455   -0.09434   -0.11961
AFIX  23
H2C1  2   -1.042445   -0.428937    0.387878    11.00000   -1.20000
H2C2  2   -1.083558   -0.350756    0.447779    11.00000   -1.20000
AFIX   0
H1N   2   -1.000000   -0.285848    0.281523    10.50000    0.02149

HKLF 4


REM  Ko836_100 in Cmc2(1)
REM wR2 = 0.0551, GooF = S = 0.960, Restrained GooF = 0.960 for all data
REM R1 = 0.0331 for 3085 Fo > 4sig(Fo) and 0.0398 for all 3427 data
REM 212 parameters refined using 1 restraints

END

WGHT      0.0117      0.0000

REM Highest difference peak  1.649,  deepest hole -1.075,  1-sigma level  0.121
Q1    1  -1.0000 -0.3290 -0.1700  10.50000  0.05    1.65
Q2    1  -1.0000 -0.3275  0.0077  10.50000  0.05    1.64
Q3    1  -1.0000 -0.3839 -0.0804  10.50000  0.05    1.08
Q4    1  -1.0700 -0.3410  0.4155  11.00000  0.05    0.78
Q5    1  -1.0477 -0.3290 -0.0867  11.00000  0.05    0.78
Q6    1  -1.0505 -0.3952  0.3456  11.00000  0.05    0.74
Q7    1  -1.0276 -0.2858 -0.0131  11.00000  0.05    0.65
Q8    1  -1.0420 -0.3959  0.4776  11.00000  0.05    0.64
Q9    1  -1.0314 -0.2836 -0.1528  11.00000  0.05    0.63
Q10   1  -1.0285 -0.3706 -0.0072  11.00000  0.05    0.59
Q11   1  -1.0267 -0.3706 -0.1512  11.00000  0.05    0.58
Q12   1  -1.0000 -0.3923 -0.2166  10.50000  0.05    0.58
Q13   1  -1.0000 -0.2693 -0.0803  10.50000  0.05    0.56
Q14   1  -1.0345 -0.3281  0.0841  11.00000  0.05    0.51
Q15   1  -1.0000 -0.2740  0.0893  10.50000  0.05    0.48
Q16   1  -0.5341 -0.5150 -0.0880  11.00000  0.05    0.45
Q17   1  -1.0350 -0.3257 -0.2399  11.00000  0.05    0.45
Q18   1  -1.0000 -0.2035 -0.0860  10.50000  0.05    0.44
Q19   1  -1.0000 -0.2205  0.2044  10.50000  0.05    0.43
Q20   1  -1.0879 -0.4728  0.2801  11.00000  0.05    0.42
Q21   1  -0.9297 -0.3799 -0.0798  11.00000  0.05    0.41
Q22   1  -0.9099 -0.5293  0.0584  11.00000  0.05    0.40
Q23   1  -1.0000 -0.4516 -0.2711  10.50000  0.05    0.39
Q24   1  -0.9511 -0.4412  0.0440  11.00000  0.05    0.39
Q25   1  -1.0000 -0.5178 -0.2477  10.50000  0.05    0.38
;
_shelx_res_checksum   99151

_shelx_hkl_file
;
   0   0  -9 49.5653 97.0297   3
   0   0  -8 8052.97 402.345   3
   0   0  -7-10.1482 77.8755   3
   0   0  -6 55156.2 913.671   3
   0   0  -5 12.6323 66.3041   3
   0   0  -4 29809.5 558.252   3
   0   0  -3 39.1756 53.2762   3
   0   0  -2 192941. 1001.24   3
   0   0   2 187754. 977.320   3
   0   0   2 185133. 1324.48   1
   0   0   3 34.0829 109.503   1
   0   0   3 15.0235 56.4701   3
   0   0   4 31971.9 782.671   1
   0   0   4 32882.9 582.106   3
   0   0   5-42.2746 133.874   1
   0   0   6 58012.4 1301.57   1
   0   0   7-22.8210 138.889   1
   0   0   8 8324.77 592.218   1
   0   0   9-120.750 197.311   1
   0   0  10 27060.1 1188.19   1
   0   0  11-69.5157 199.087   1
   0   0  12 6354.16 674.093   1
   0   0  13 145.151 269.589   1
   0   0  14 7397.55 779.266   1
   0  -2 -10 7292.73 512.816   3
   0  -2  -9 15871.5 721.118   3
   0   2  -8 13040.7 301.446   3
   0  -2  -8 14136.8 647.870   3
   0  -2  -7 9230.49 504.989   3
   0   2  -7 9081.55 247.435   3
   0  -2  -6 18043.8 665.120   3
   0   2  -6 16533.1 310.555   3
   0  -2  -5 56777.1 1107.13   3
   0  -2  -4 75442.3 1189.71   3
   0  -2  -3 305719. 2185.67   3
   0  -2  -2 86171.7 857.915   2
   0  -2  -2 85247.0 1059.60   3
   0   2  -1 48575.3 522.496   3
   0  -2  -1 47392.9 710.344   3
   0  -2   1 53971.9 543.684   3
   0   2   1 53625.7 752.668   3
   0   2   2 77501.7 1003.71   3
   0   2   3 320561. 2247.92   3
   0  -2   4 68249.9 1173.00   1
   0  -2   5 59529.1 1229.01   1
   0  -2   6 18919.5 763.619   1
   0  -2   7 6746.35 510.410   1
   0   2   7 6413.10 495.933   1
   0   2   8 14184.3 773.408   1
   0  -2   8 13974.6 764.624   1
   0  -2   9 16847.6 890.754   1
   0   2   9 15995.6 876.047   1
   0   2  10 7478.07 652.749   1
   0  -2  10 8104.29 676.299   1
   0   2  11 6879.92 664.686   1
   0  -2  11 6331.23 628.914   1
   0   2  12 2140.38 434.987   1
   0   2  13 9397.55 847.603   1
   0   2  14 416.028 286.657   1
   0   2  15 5534.51 747.507   1
   0  -4 -11 10983.2 740.417   3
   0  -4 -10 3874.76 443.310   3
   0  -4  -9 12604.0 741.025   3
   0  -4  -8 10728.1 661.578   3
   0  -4  -7 64530.2 1525.49   3
   0  -4  -6 6511.87 479.075   3
   0  -4  -5 76874.0 1512.62   3
   0   4  -4 12222.0 267.104   3
   0  -4  -4 12403.9 594.822   3
   0  -4  -3 46428.5 1065.76   3
   0   4  -3 48369.5 643.230   3
   0  -4  -3 49878.5 795.773   2
   0  -4  -2 26902.5 769.777   3
   0   4  -2 27841.2 555.990   3
   0  -4  -1 20008.0 620.708   3
   0   4  -1 20470.0 529.484   3
   0   4   0 52356.0 915.531   3
   0  -4   0 50467.7 913.938   3
   0  -4   1 23228.6 565.189   3
   0   4   2 24907.3 458.664   2
   0  -4   2 23818.2 525.718   3
   0   4   9 14175.3 841.698   1
   0   4  10 3394.28 473.520   1
   0   4  11 12589.8 900.554   1
   0   4  12 86.5859 218.899   1
   0   4  13 9908.36 893.403   1
   0   4  14 4278.11 639.916   1
   0   4  15 2935.84 583.085   1
   0  -6 -12 13477.7 939.100   3
   0  -6 -11 243.807 223.568   3
   0  -6 -10 17038.5 989.867   3
   0  -6  -9 1708.56 348.932   3
   0  -6  -8 48707.4 1550.65   3
   0  -6  -7 1777.19 324.192   3
   0  -6  -6 27244.6 1075.51   3
   0   6  -5 2704.04 170.277   3
   0  -6  -5 2417.81 339.286   3
   0  -6  -4 22742.8 915.220   3
   0   6  -4 25297.1 587.636   3
   0  -6  -3 13264.1 672.063   3
   0  -6  -2 72714.4 1480.78   3
   0  -6  -1 370.223 159.914   3
   0  -6   0 25822.7 808.043   3
   0  -6   1 555.796 153.851   3
   0   6   2 64168.0 838.408   2
   0  -6   2 62646.9 1120.18   3
   0  -6   3 12734.4 467.937   3
   0   6   3 13099.7 399.284   2
   0   6  11 410.620 274.952   1
   0   6  12 12925.1 990.522   1
   0   6  13 537.018 310.019   1
   0   6  14 6334.37 785.071   1
   0   6  15 1001.27 392.871   1
   0  -8 -12 8798.11 838.590   3
   0  -8 -11 13766.4 1006.26   3
   0  -8 -10 4789.23 600.597   3
   0  -8  -9 7604.60 710.783   3
   0  -8  -8 5876.27 613.257   3
   0  -8  -7 10365.8 776.256   3
   0  -8  -6 10813.4 763.873   3
   0  -8  -5 16879.8 914.292   3
   0  -8  -4 7390.46 600.378   3
   0  -8  -3 17528.8 872.189   3
   0  -8  -2 19389.0 878.702   3
   0  -8  -1 15521.1 762.776   3
   0  -8   0 21949.6 866.346   3
   0  -8   1 20444.0 797.571   3
   0  -8   2 19348.2 747.623   3
   0  -8   3 14672.0 619.878   3
   0   8   3 14794.8 451.952   2
   0   8  13 1956.68 461.698   1
   0   8  14 1931.76 498.199   1
   0   8  15 2311.74 548.258   1
   0 -10 -13 4956.32 707.565   3
   0 -10 -12 496.314 326.966   3
   0 -10 -11 12066.5 1036.68   3
   0 -10 -10 544.933 312.625   3
   0 -10  -9 11674.7 961.906   3
   0 -10  -8 4267.44 594.971   3
   0 -10  -7 12830.6 942.486   3
   0 -10  -6 1708.41 367.923   3
   0 -10  -5 22074.8 1154.90   3
   0 -10  -4 515.503 255.943   3
   0 -10  -3 15075.2 901.562   3
   0 -10  -2 3044.49 417.828   3
   0 -10  -1 27096.4 1116.90   3
   0 -10   0 674.119 228.543   3
   0 -10   1 31998.3 1143.89   3
   0 -10   2 2775.71 348.462   3
   0 -10   3 17991.1 794.035   3
   0  10   3 17680.8 523.468   2
   0  10  14-198.728 380.117   1
   0 -12 -13 763.972 358.072   3
   0 -12 -12 3788.44 670.599   3
   0 -12 -11 1337.28 451.486   3
   0 -12 -10 4360.08 696.962   3
   0 -12  -9 3589.61 610.947   3
   0 -12  -8 8812.03 885.084   3
   0 -12  -7 2295.29 477.961   3
   0 -12  -6 10327.3 899.294   3
   0 -12  -5 11085.9 905.917   3
   0 -12  -4 16113.2 1053.01   3
   0 -12  -3 1742.24 399.514   3
   0 -12  -2 20297.8 1112.65   3
   0 -12  -1 2600.45 434.398   3
   0 -12   0 18978.8 1015.62   3
   0 -12   1 2899.80 411.900   3
   0 -12   2 21210.2 1020.19   3
   0 -12   3 2713.42 379.812   3
   0 -14 -12 2713.86 632.706   3
   0 -14 -11 1033.15 450.540   3
   0 -14 -10 3632.93 678.364   3
   0 -14  -9 2143.12 552.997   3
   0 -14  -8 8164.50 929.305   3
   0 -14  -7 917.969 374.574   3
   0 -14  -6 7248.91 829.039   3
   0 -14  -5 1075.85 370.800   3
   0 -14  -4 13866.4 1069.35   3
   0 -14  -3 5966.26 705.261   3
   0 -14  -2 16875.8 1116.33   3
   0 -14  -1 7207.15 721.786   3
   0 -14   0 18177.7 1106.34   3
   0 -14   1 6006.73 630.455   3
   0 -14   2 15919.6 969.609   3
   0 -14   3 5810.87 584.118   3
   0 -16  -9 8318.18 1030.88   3
   0 -16  -8 802.378 411.426   3
   0 -16  -7 5323.76 811.170   3
   0 -16  -6 275.396 358.417   3
   0 -16  -5 11868.2 1114.34   3
   0 -16  -4 254.111 317.208   3
   0 -16  -3 11561.7 1033.63   3
   0 -16  -2 3725.19 609.601   3
   0 -16  -1 20218.9 1285.69   3
   0 -16   0 687.449 306.651   3
   0 -16   1 20008.1 1222.53   3
   0 -16   2 3318.45 510.563   3
   0 -16   3 11817.3 900.382   3
   0 -18  -7 7544.57 994.149   3
   0 -18  -6 6269.98 894.237   3
   0 -18  -5 6368.51 892.667   3
   0 -18  -4 6552.72 875.596   3
   0 -18  -3 5536.92 798.441   3
   0 -18  -2 3155.81 627.659   3
   0 -18  -1 4490.87 694.338   3
   0 -18   0 8788.02 918.896   3
   0 -18   1 5396.38 716.694   3
   0 -18   2 2723.35 517.352   3
   0 -20  -3 762.750 412.660   3
   0 -20  -2 6297.70 899.039   3
   0 -20  -1 217.418 316.308   3
   0 -20   0 3746.90 685.368   3
  -1  -1 -10 3858.57 358.444   3
   1  -1 -10 3694.73 328.516   3
  -1  -1  -9 18952.9 737.856   3
  -1   1  -9 19262.2 580.178   3
   1  -1  -9 18288.4 691.799   3
  -1  -1  -8 3120.38 301.712   3
   1  -1  -8 3244.49 300.384   3
  -1   1  -8 3439.19 245.349   3
  -1   1  -7 13693.4 447.905   3
  -1  -1  -7 14005.3 582.269   3
   1   1  -7 13778.4 390.523   3
   1  -1  -7 14123.4 554.920   3
  -1   1  -6 3102.26 205.725   3
   1   1  -6 3150.09 175.199   3
  -1  -1  -6 3088.69 264.966   3
   1  -1  -6 3173.61 257.409   3
  -1  -1  -5 40885.8 869.588   3
  -1   1  -5 40401.9 663.136   3
   1   1  -5 40925.1 547.083   3
   1  -1  -5 40768.1 823.967   3
  -1  -1  -4 21926.2 591.842   3
  -1   1  -4 22317.0 442.210   3
   1   1  -4 21851.3 342.001   3
   1  -1  -4 21800.4 560.102   3
  -1  -1  -3 7693.08 323.815   3
   1   1  -3 7277.84 326.254   1
   1  -1  -3 8162.17 313.009   3
  -1   1  -2 25378.7 556.234   1
  -1  -1  -2 26502.4 542.086   2
   1   1  -2 26467.8 484.703   1
   1  -1  -2 26363.9 494.435   3
  -1  -1  -2 26191.3 516.318   3
   1   1   2 28106.7 541.062   3
  -1   1   2 26953.2 506.087   3
   1  -1   2 27502.7 565.775   1
   1  -1   3 5939.83 330.092   1
   1   1   3 5978.71 285.738   3
  -1  -1   3 5832.93 289.960   1
  -1   1   3 5900.54 272.293   3
  -1   1   4 21528.6 550.578   3
   1  -1   4 21845.2 677.359   1
   1   1   4 22432.6 591.082   3
  -1  -1   4 21166.2 617.288   1
  -1  -1   4 21262.9 339.327   3
  -1  -1   5 40061.0 947.797   1
   1   1   5 39740.9 1015.11   1
  -1   1   5 38535.2 939.734   1
  -1   1   5 39107.9 801.211   3
   1  -1   5 40465.9 1020.85   1
  -1   1   6 2107.46 267.378   1
   1   1   6 1985.22 280.839   1
   1  -1   6 1978.50 278.895   1
  -1  -1   6 2257.13 276.592   1
  -1  -1   7 15820.1 727.403   1
   1   1   7 16176.0 773.275   1
  -1   1   7 15398.0 719.694   1
   1  -1   7 15829.3 762.574   1
  -1   1   8 3825.15 402.872   1
   1  -1   8 3495.16 412.363   1
  -1  -1   8 3953.99 415.764   1
   1   1   8 3479.31 399.824   1
  -1  -1   9 17342.9 886.326   1
   1  -1   9 17202.5 918.291   1
  -1   1   9 18456.1 907.215   1
   1   1   9 17829.3 938.628   1
   1   1  10 2744.24 429.591   1
  -1   1  10 3006.09 433.440   1
  -1  -1  10 3282.23 446.861   1
   1  -1  10 3451.06 473.953   1
   1  -1  11 12715.0 896.160   1
  -1  -1  11 13265.2 874.930   1
   1   1  11 13301.1 912.375   1
  -1   1  11 12782.1 857.754   1
  -1  -1  12 1117.49 333.018   1
   1   1  12 757.385 333.241   1
   1  -1  12 743.625 320.017   1
  -1   1  12 422.659 258.741   1
   1   1  13 4042.89 595.436   1
   1  -1  13 4590.76 622.246   1
  -1   1  13 4593.25 611.937   1
   1   1  14 4436.96 650.190   1
  -1   1  14 3405.01 562.742   1
   1   1  15 4578.45 700.337   1
  -1   1  15 5971.83 747.696   1
   1   1  16 794.634 398.422   1
  -1  -3 -11 1775.83 302.559   3
  -1  -3 -10 12528.8 728.589   3
   1  -3 -10 10740.8 658.496   3
  -1  -3  -9 1726.61 289.492   3
   1  -3  -9 1626.48 283.726   3
  -1  -3  -8 16642.9 771.351   3
   1  -3  -8 16956.5 760.320   3
   1  -3  -7 3061.34 322.239   3
  -1  -3  -7 3412.84 349.157   3
  -1  -3  -6 39350.7 1076.63   3
   1  -3  -6 39936.1 1062.77   3
   1  -3  -5 6448.82 417.858   3
  -1  -3  -5 5858.53 409.246   3
  -1  -3  -4 77911.0 1352.51   3
   1  -3  -4 78091.3 1326.44   3
  -1   3  -3 32315.0 492.487   3
   1  -3  -3 31548.2 797.831   3
  -1  -3  -3 32017.1 710.035   2
  -1  -3  -3 31016.4 807.533   3
   1  -3  -2 71115.0 644.256   2
  -1  -3  -2 68125.0 1108.12   3
  -1   3  -2 71366.3 793.661   3
  -1  -3  -2 70376.6 903.584   2
   1   3  -2 69874.6 687.472   3
   1  -3  -2 68104.6 1095.31   3
  -1   3  -1 3676.93 211.785   3
  -1  -3  -1 3509.71 247.557   3
   1  -3  -1 3678.26 255.353   3
   1   3  -1 3563.89 191.649   3
  -1  -3   0 70109.3 929.299   3
   1   3   0 70337.3 922.458   3
   1  -3   0 68750.8 949.184   3
  -1   3   0 70844.5 952.594   3
  -1   3   1 3767.50 255.620   3
   1   3   1 3927.37 259.780   3
   1  -3   1 3906.31 221.458   3
  -1  -3   1 4094.28 209.062   3
   1   3   2 66268.5 877.423   2
  -1  -3   2 65915.1 674.905   3
  -1   3   8 14811.6 782.781   1
   1   3   8 15145.6 822.499   1
  -1   3   9 1255.56 285.052   1
   1   3   9 1594.67 326.450   1
   1   3  10 13830.8 890.750   1
  -1   3  10 12798.0 835.032   1
  -1   3  11 1554.73 359.307   1
   1   3  11 1877.83 390.788   1
  -1   3  12 10304.8 840.782   1
   1   3  12 9038.53 818.938   1
   1   3  13 442.894 318.207   1
  -1   3  13-42.9940 250.995   1
   1   3  14 7923.05 844.001   1
  -1   3  14 8549.44 852.216   1
  -1   3  15-214.339 340.459   1
   1   3  15-106.644 335.935   1
   1   3  16 3388.27 660.823   1
   1  -5 -11 4088.40 487.220   3
  -1  -5 -11 4317.52 506.687   3
   1  -5 -10 1292.48 294.203   3
  -1  -5 -10 1354.00 316.252   3
   1  -5  -9 16028.6 878.698   3
  -1  -5  -9 15008.5 863.264   3
   1  -5  -8 22450.0 994.589   3
  -1  -5  -8 22415.6 1010.46   3
  -1  -5  -7 20468.0 932.506   3
   1  -5  -7 23238.4 974.666   3
   1  -5  -6 25714.1 989.623   3
  -1  -5  -6 26466.6 1015.79   3
  -1   5  -6 23515.0 356.830   3
   1  -5  -5 10274.2 607.173   3
  -1  -5  -5 10096.6 610.919   3
  -1   5  -5 10590.1 311.746   3
   1   5  -4 32197.3 526.669   3
  -1   5  -4 32487.6 614.608   3
   1  -5  -4 32258.2 1013.75   3
   1  -5  -4 32600.0 695.610   2
  -1  -5  -4 32078.7 1024.58   3
  -1  -5  -3 21860.0 811.122   3
   1   5  -3 22916.6 523.373   3
   1  -5  -3 21682.6 796.480   3
  -1   5  -3 22842.1 566.824   3
   1  -5  -3 22302.6 469.581   2
   1  -5  -2 38022.1 996.199   3
   1   5  -2 40268.7 774.003   3
  -1  -5  -2 38825.1 1011.93   3
  -1   5  -2 39963.4 801.044   3
  -1  -5  -1 13013.0 563.408   3
   1  -5  -1 13108.4 564.625   3
   1  -5   0 739.231 174.736   3
  -1  -5   0 629.259 158.737   3
   1  -5   1 12470.5 493.630   3
  -1  -5   1 12405.3 483.675   3
   1  -5   2 37840.1 796.560   3
  -1   5   2 38862.4 457.191   2
  -1  -5   2 37053.5 755.990   3
   1   5   2 37766.4 719.468   2
   1   5   3 21530.3 579.352   2
  -1  -5   3 22098.0 518.588   3
  -1   5  10 3195.20 453.587   1
   1   5  10 2718.74 444.785   1
  -1   5  11 3462.66 502.161   1
   1   5  11 3561.15 526.910   1
   1   5  12 6415.89 720.915   1
  -1   5  12 7041.46 713.246   1
  -1   5  13 4702.39 639.183   1
   1   5  13 5469.05 699.158   1
   1   5  14 2945.27 568.989   1
  -1   5  14 3150.09 554.213   1
  -1   5  15 2753.40 551.672   1
   1   5  15 3227.36 616.394   1
   1  -7 -12 1136.30 340.169   3
  -1  -7 -12 1124.04 337.994   3
  -1  -7 -11 16752.4 1066.24   3
   1  -7 -11 14920.6 1004.87   3
   1  -7 -10 2155.06 396.275   3
  -1  -7 -10 1958.21 395.728   3
  -1  -7  -9 18416.0 1055.39   3
   1  -7  -9 19236.7 1068.37   3
   1  -7  -8 577.408 262.908   3
  -1  -7  -8 633.399 252.136   3
   1  -7  -7 36347.3 1362.99   3
  -1  -7  -7 36088.0 1368.37   3
  -1  -7  -6 6263.40 567.965   3
   1  -7  -6 5541.59 540.371   3
  -1   7  -6 5445.70 262.640   3
  -1  -7  -5 15789.0 849.488   3
   1  -7  -5 15509.7 830.166   3
   1   7  -5 14864.7 442.484   3
  -1   7  -5 14438.6 484.654   3
   1  -7  -4 6318.07 530.353   3
  -1  -7  -4 5783.28 511.828   3
   1  -7  -3 36865.0 1180.61   3
  -1  -7  -3 36744.8 1190.42   3
   1  -7  -2 304.751 173.285   3
  -1  -7  -2 387.300 199.064   3
   1  -7  -1 39298.4 1122.85   3
  -1  -7  -1 38634.3 1113.02   3
  -1  -7   0 420.331 162.032   3
   1  -7   0 477.941 173.730   3
  -1  -7   1 35671.7 971.945   3
   1  -7   1 35988.3 997.163   3
  -1  -7   2 769.741 169.168   3
  -1   7   2 747.199 89.5962   2
   1  -7   2 694.308 170.157   3
  -1  -7   3 33207.6 830.406   3
   1   7   3 32548.1 760.278   2
  -1  -7   4 4915.55 302.686   3
   1   7   4 5205.03 320.451   2
   1   7  12 1623.29 434.918   1
  -1   7  12 1339.35 404.791   1
   1   7  13 7041.83 809.356   1
  -1   7  13 6364.67 739.501   1
   1   7  14 57.6758 289.734   1
  -1   7  14 412.128 319.350   1
   1   7  15 2553.22 566.692   1
   1  -9 -12 11555.3 989.944   3
  -1  -9 -12 10477.4 963.943   3
  -1  -9 -11 2267.00 474.532   3
   1  -9 -11 2541.34 492.149   3
  -1  -9 -10 13784.0 1034.91   3
   1  -9 -10 14419.4 1058.43   3
  -1  -9  -9 2497.82 464.955   3
   1  -9  -9 2104.30 433.970   3
  -1  -9  -8 13700.3 963.321   3
   1  -9  -8 14579.0 987.384   3
   1  -9  -7 1898.53 387.784   3
  -1  -9  -7 1963.35 398.255   3
  -1  -9  -6 24622.1 1201.89   3
   1  -9  -6 25753.8 1227.74   3
   1  -9  -5 4087.54 498.208   3
  -1  -9  -5 4066.49 501.391   3
   1  -9  -4 30598.5 1254.42   3
  -1  -9  -4 29600.0 1240.73   3
   1  -9  -3 3967.69 461.069   3
  -1  -9  -3 4583.70 492.489   3
  -1  -9  -2 26884.6 1102.80   3
   1  -9  -2 27600.6 1109.86   3
   1  -9  -1 11025.3 690.146   3
  -1  -9  -1 10924.9 689.095   3
  -1  -9   0 16995.1 812.914   3
   1  -9   0 16552.9 815.586   3
  -1  -9   1 10941.8 630.781   3
   1  -9   1 11496.0 654.739   3
  -1  -9   2 31769.4 1017.84   3
   1  -9   2 31222.3 1025.23   3
  -1   9   2 29693.0 572.718   2
  -1  -9   3 4916.18 397.024   3
   1  -9   3 4703.52 398.525   3
   1   9   3 4697.17 315.733   2
   1   9   4 26404.5 719.713   2
  -1  -9   4 25059.6 821.196   3
   1   9  13 1417.31 467.293   1
  -1   9  13 890.867 367.334   1
  -1   9  14 1907.20 496.025   1
   1   9  14 2363.41 599.715   1
  -1 -11 -13 3805.58 667.055   3
   1 -11 -13 3853.95 658.200   3
   1 -11 -12 2999.57 571.098   3
  -1 -11 -12 3505.83 631.855   3
   1 -11 -11 2027.87 488.136   3
  -1 -11 -11 2157.30 491.532   3
  -1 -11 -10 8412.93 877.953   3
   1 -11 -10 7531.03 833.876   3
  -1 -11  -9 2119.69 466.286   3
   1 -11  -9 2897.40 533.695   3
  -1 -11  -8 4615.74 634.682   3
   1 -11  -8 4510.20 627.877   3
   1 -11  -7 10715.0 906.123   3
  -1 -11  -7 9769.04 867.963   3
   1 -11  -6 14470.0 1015.87   3
  -1 -11  -6 16323.7 1076.91   3
   1 -11  -5 1728.55 381.790   3
  -1 -11  -5 1713.84 391.997   3
   1 -11  -4 19665.8 1110.77   3
  -1 -11  -4 19218.9 1093.86   3
  -1 -11  -3 10441.4 790.196   3
   1 -11  -3 9591.57 768.862   3
  -1 -11  -2 10883.0 788.172   3
   1 -11  -2 11293.1 797.703   3
   1 -11  -1 7366.51 639.020   3
  -1 -11  -1 7339.89 626.545   3
  -1 -11   0 33240.0 1267.30   3
   1 -11   0 35736.6 1329.77   3
  -1 -11   1 6433.34 551.162   3
   1 -11   1 6722.28 574.854   3
   1 -11   2 11727.0 724.436   3
  -1 -11   2 11483.3 707.258   3
  -1  11   2 11930.4 411.503   2
  -1 -11   3 9469.70 617.727   3
   1 -11   3 8557.25 594.292   3
   1  11   3 8702.75 450.235   2
  -1  11   3 8210.65 269.338   2
   1  11   4 19397.7 628.373   2
  -1 -11   4 19533.0 842.600   3
  -1  11  14 4448.96 714.901   1
   1 -13 -13 6356.47 894.123   3
  -1 -13 -13 6318.60 891.421   3
   1 -13 -12 852.593 425.114   3
  -1 -13 -12 415.833 346.670   3
  -1 -13 -11 5441.96 808.147   3
   1 -13 -11 6239.82 835.231   3
   1 -13 -10 300.185 331.807   3
  -1 -13 -10 58.7196 262.674   3
  -1 -13  -9 13415.8 1158.40   3
   1 -13  -9 14210.8 1185.61   3
  -1 -13  -8 360.468 305.017   3
   1 -13  -8 248.840 282.369   3
  -1 -13  -7 8038.04 872.406   3
   1 -13  -7 9169.82 911.501   3
   1 -13  -6 272.946 287.220   3
  -1 -13  -6-65.3240 266.307   3
  -1 -13  -5 13443.0 1034.52   3
   1 -13  -5 13845.3 1050.13   3
  -1 -13  -4-94.2139 251.010   3
   1 -13  -4 62.4974 219.337   3
  -1 -13  -3 22419.9 1252.42   3
   1 -13  -3 22470.2 1264.50   3
   1 -13  -2 843.250 286.815   3
  -1 -13  -2 1012.04 314.953   3
   1 -13  -1 20688.5 1146.14   3
  -1 -13  -1 20283.3 1126.16   3
   1 -13   0 688.959 263.010   3
  -1 -13   0 936.833 293.928   3
   1 -13   1 19403.5 1055.49   3
  -1 -13   1 18609.3 1029.80   3
  -1 -13   2 853.807 283.070   3
   1 -13   2 907.462 278.107   3
  -1 -13   3 23759.9 1088.58   3
  -1 -13   4 61.0217 140.765   3
   1 -15 -11 1482.20 520.281   3
  -1 -15 -11 1734.78 529.528   3
  -1 -15 -10 6296.98 909.356   3
   1 -15 -10 5956.83 873.454   3
   1 -15  -9 4335.71 752.584   3
  -1 -15  -9 4090.08 728.914   3
  -1 -15  -8 5003.41 785.908   3
   1 -15  -8 4706.47 750.413   3
   1 -15  -7 4772.51 731.874   3
  -1 -15  -7 6203.66 815.548   3
   1 -15  -6 8270.00 917.635   3
  -1 -15  -6 7302.97 873.881   3
  -1 -15  -5 2872.03 559.348   3
   1 -15  -5 2971.94 582.416   3
   1 -15  -4 8807.89 894.457   3
  -1 -15  -4 7912.14 853.794   3
  -1 -15  -3 4937.06 662.347   3
   1 -15  -3 5723.02 719.441   3
   1 -15  -2 9872.98 901.762   3
  -1 -15  -2 10286.8 910.233   3
  -1 -15  -1 3510.40 553.858   3
   1 -15  -1 3315.12 530.864   3
   1 -15   0 22260.5 1268.28   3
  -1 -15   0 23499.5 1304.16   3
  -1 -15   1 2712.34 475.919   3
   1 -15   1 2606.92 458.367   3
   1 -15   2 8366.86 760.693   3
  -1 -15   2 8562.88 753.680   3
  -1 -15   3 5533.77 603.261   3
  -1 -15   4 9354.97 736.959   3
  -1 -17  -8 6569.78 928.733   3
   1 -17  -8 7693.49 990.957   3
   1 -17  -7 494.398 302.960   3
  -1 -17  -7 303.862 345.208   3
  -1 -17  -6 6990.31 906.288   3
   1 -17  -6 7016.70 917.311   3
  -1 -17  -5 4885.75 773.785   3
   1 -17  -5 5643.36 825.168   3
   1 -17  -4 10403.4 1051.09   3
  -1 -17  -4 8672.28 964.209   3
   1 -17  -3 205.884 253.547   3
  -1 -17  -3 420.073 329.513   3
  -1 -17  -2 10272.7 993.454   3
   1 -17  -2 8536.15 908.356   3
   1 -17  -1 1857.94 470.332   3
  -1 -17  -1 2543.11 512.620   3
  -1 -17   0 8234.88 853.689   3
   1 -17   0 9340.74 916.274   3
   1 -17   1 2173.90 465.175   3
  -1 -17   1 1872.62 437.781   3
  -1 -17   2 9008.18 846.135   3
  -1 -17   3 663.392 303.506   3
   1 -19  -5 11365.8 1198.63   3
  -1 -19  -5 10884.4 1168.99   3
   1 -19  -4 747.135 408.499   3
  -1 -19  -4 526.923 359.587   3
  -1 -19  -3 7021.53 922.039   3
   1 -19  -3 7613.60 954.261   3
   1 -19  -2 384.695 335.557   3
  -1 -19  -2 1170.47 453.252   3
  -1 -19  -1 6993.80 877.673   3
   1 -19  -1 8004.72 933.262   3
   1 -19   0 504.363 334.922   3
  -1 -19   0 312.311 315.723   3
  -1 -19   1 7556.66 865.812   3
  -1 -19   2 527.746 303.994   3
  -1 -21  -1 4261.01 768.157   3
  -1 -21   0 1636.98 524.494   3
  -1 -21   1 4425.79 733.854   3
  -2   0 -10 24550.6 814.224   3
  -2   0  -9 135.224 118.605   3
  -2   0  -8 11345.9 525.053   3
  -2   0  -7 140.847 101.351   3
  -2   0  -6 24900.7 691.908   3
   2   0  -6 25459.2 604.518   3
  -2   0  -5-14.1334 72.2883   3
   2   0  -5 66.9396 75.9447   3
  -2   0  -4 51347.0 854.438   3
  -2   0  -2 63547.4 925.251   2
   2   0   1 17.6339 65.7001   1
  -2   0   2 48886.2 545.748   1
   2   0   2 46194.2 765.047   1
   2   0   3 48.8728 123.778   1
  -2   0   3-16.1792 79.8547   1
  -2   0   3 63.6913 65.0009   3
  -2   0   4 52106.8 904.246   1
   2   0   4 51188.3 1065.55   1
  -2   0   4 52146.7 737.635   3
  -2   0   5 94.9594 72.6152   3
   2   0   5-21.5306 148.209   1
  -2   0   5 28.9128 112.398   1
  -2   0   6 24590.1 800.111   1
   2   0   6 24074.4 892.111   1
  -2   0   6 24246.2 584.541   3
  -2   0   7 75.0874 74.4869   3
   2   0   7-52.4044 158.526   1
  -2   0   7 79.5210 140.406   1
   2   0   8 13381.5 777.477   1
  -2   0   8 13699.0 713.603   1
  -2   0   9 121.941 178.200   1
   2   0   9-148.422 229.071   1
  -2   0  10 24731.0 1082.67   1
   2   0  10 23633.0 1153.21   1
   2   0  11-20.2500 228.441   1
  -2   0  11-98.0450 208.609   1
   2   0  12 4281.55 586.750   1
  -2   0  12 5902.42 622.101   1
   2   0  13 93.2526 276.001   1
  -2   0  13 26.7648 233.955   1
   2   0  14 5839.75 751.024   1
   2   0  15-171.578 267.222   1
   2  -2 -10 5681.97 442.514   3
  -2  -2 -10 5495.55 468.202   3
   2  -2  -9 13851.0 660.311   3
  -2  -2  -9 13834.5 706.388   3
  -2   2  -9 13636.0 455.282   3
  -2  -2  -8 2384.29 302.354   3
  -2   2  -8 2514.46 199.455   3
   2  -2  -8 2202.59 265.703   3
  -2   2  -7 10712.9 387.250   3
   2  -2  -7 10187.5 524.287   3
  -2  -2  -7 10051.8 557.463   3
   2  -2  -6 10793.9 518.390   3
  -2  -2  -6 10433.8 533.816   3
  -2   2  -6 10681.7 371.954   3
  -2  -2  -5 35622.7 926.393   3
   2  -2  -5 35908.6 884.579   3
   2  -2  -4 12530.5 498.310   3
  -2  -2  -4 12993.5 531.149   3
  -2  -2  -3 7137.52 371.267   3
   2  -2  -3 7309.19 361.807   3
   2   2  -3 7170.74 325.531   1
   2  -2  -2 58835.8 919.991   3
  -2  -2  -2 60212.7 935.384   2
  -2  -2  -2 58149.5 953.169   3
  -2  -2  -1 11269.5 389.407   3
   2  -2  -1 10661.9 375.729   3
  -2   2   0 92068.4 688.199   2
  -2  -2   0 89993.2 964.518   3
  -2   2   1 12930.8 411.215   3
   2   2   2 66535.6 1009.83   3
  -2   2   2 65220.3 974.550   3
   2   2   2 65770.1 962.629   2
  -2   2   3 12370.6 459.490   3
   2  -2   3 11246.2 477.633   1
   2  -2   4 10248.3 506.211   1
   2  -2   5 32851.9 972.810   1
   2  -2   6 12819.9 664.729   1
   2  -2   7 10677.4 656.313   1
  -2  -2   7 10866.9 598.234   1
  -2   2   7 11143.1 604.558   1
   2   2   7 11112.7 674.380   1
  -2  -2   8 2709.54 347.668   1
   2  -2   8 3090.18 408.779   1
  -2   2   8 2891.69 353.401   1
   2   2   8 2836.65 395.043   1
   2   2   9 14854.1 877.277   1
  -2   2   9 15788.5 834.050   1
   2  -2   9 14731.4 871.128   1
   2  -2  10 5011.70 555.692   1
  -2   2  10 5000.16 528.038   1
   2   2  10 4856.74 552.717   1
  -2   2  11 5704.32 592.303   1
   2  -2  11 5344.65 602.137   1
   2   2  11 5106.59 604.116   1
   2   2  12 4062.08 577.266   1
   2  -2  12 4531.61 593.594   1
  -2   2  12 4120.91 532.020   1
  -2   2  13 8717.34 790.418   1
   2   2  13 8895.56 859.136   1
   2   2  14 1254.22 409.071   1
  -2   2  14 1256.19 361.311   1
   2   2  15 4391.61 682.025   1
   2   2  16 1270.48 486.057   1
   2  -4 -11 7412.59 606.315   3
  -2  -4 -11 7227.59 617.621   3
  -2  -4 -10 2012.70 342.228   3
   2  -4 -10 2036.64 328.027   3
   2  -4  -9 10284.4 670.341   3
  -2  -4  -9 10433.3 692.691   3
  -2   4  -8 3076.70 134.222   3
  -2  -4  -8 3762.63 413.706   3
   2  -4  -8 4412.06 438.190   3
  -2   4  -7 23634.0 455.192   3
  -2  -4  -7 23687.6 965.382   3
   2  -4  -7 23431.2 930.490   3
   2  -4  -6 3023.29 337.350   3
  -2  -4  -6 2574.48 326.717   3
   2  -4  -5 22308.6 822.755   3
  -2  -4  -5 21686.9 845.407   3
  -2  -4  -4 5121.77 403.006   3
   2  -4  -4 5707.91 414.046   3
  -2   4  -3 66751.3 932.263   3
  -2  -4  -3 65550.5 1300.00   3
   2  -4  -3 65782.8 1287.60   3
  -2  -4  -2 8107.45 442.767   3
   2  -4  -2 8124.94 443.390   3
   2   4  -2 8596.95 324.582   3
  -2   4  -2 8769.51 359.948   3
   2   4  -1 37724.6 735.653   3
  -2  -4  -1 34957.7 840.932   3
   2  -4  -1 35304.6 856.206   3
  -2   4  -1 35718.9 765.526   3
  -2  -4   0 3405.64 264.254   3
   2  -4   0 2802.35 251.295   3
  -2  -4   1 31168.5 670.364   3
   2   4   2 7856.90 371.335   2
  -2  -4   2 7996.40 310.807   3
   2   4   3 70348.2 1134.69   2
  -2  -4   3 71191.5 780.000   3
  -2   4   9 10351.9 698.852   1
   2   4   9 10625.5 768.102   1
  -2   4  10 1854.71 358.516   1
   2   4  10 1491.67 361.729   1
   2   4  11 8297.85 762.407   1
  -2   4  11 8694.52 724.154   1
  -2   4  12 924.798 312.793   1
   2   4  12 928.706 351.692   1
   2   4  13 8382.01 841.276   1
  -2   4  13 8888.95 819.487   1
   2   4  14 3838.66 648.236   1
  -2   4  14 3962.34 602.833   1
   2   4  15 3832.31 645.537   1
  -2  -6 -12 8643.97 774.745   3
  -2  -6 -11-49.9115 191.091   3
   2  -6 -11 95.3167 193.435   3
  -2  -6 -10 9182.79 752.664   3
   2  -6 -10 8412.61 700.591   3
   2  -6  -9 1738.68 341.710   3
  -2  -6  -9 2169.59 379.981   3
   2  -6  -8 16826.5 925.356   3
  -2  -6  -8 16857.6 936.757   3
  -2  -6  -7 10945.9 734.851   3
   2  -6  -7 10691.0 714.999   3
  -2   6  -6 23365.7 543.652   3
   2  -6  -6 23092.3 999.191   3
  -2  -6  -6 23789.2 1029.24   3
  -2  -6  -5 199.768 161.962   3
   2  -6  -5 124.397 90.1526   2
  -2   6  -5 317.167 90.9100   3
   2  -6  -5 319.252 183.969   3
   2  -6  -4 28813.3 571.498   2
  -2  -6  -4 28699.7 1039.69   3
   2  -6  -4 27860.4 1022.15   3
  -2  -6  -3 13823.2 698.971   3
   2  -6  -3 13912.6 701.812   3
   2   6  -3 14520.9 490.613   3
  -2  -6  -2 42034.3 1155.30   3
   2  -6  -2 41808.4 1152.91   3
   2  -6  -1 196.053 153.554   3
  -2  -6  -1 399.216 175.791   3
  -2  -6   0 26233.9 827.155   3
   2  -6   0 26366.9 835.696   3
  -2  -6   1 271.805 131.331   3
   2  -6   1 267.809 143.131   3
  -2  -6   2 42098.8 916.943   3
  -2  -6   3 13398.5 474.118   3
   2   6   3 13334.4 524.481   2
  -2  -6   4 25582.6 580.232   3
   2   6   4 24937.8 743.329   2
   2   6  11 288.225 296.036   1
  -2   6  11-70.9941 204.726   1
   2   6  12 9258.48 873.217   1
  -2   6  12 8124.45 776.284   1
  -2   6  13 1078.31 360.988   1
   2   6  13 710.828 369.281   1
   2   6  14 4017.47 655.000   1
  -2   6  14 3347.28 566.227   1
   2   6  15 91.0668 292.261   1
  -2  -8 -12 6959.66 757.201   3
   2  -8 -12 6045.39 702.027   3
   2  -8 -11 5399.10 651.271   3
  -2  -8 -11 6103.65 686.860   3
   2  -8 -10 6974.38 709.882   3
  -2  -8 -10 6168.10 676.628   3
   2  -8  -9 3392.74 498.644   3
  -2  -8  -9 3345.18 502.251   3
  -2  -8  -8 10369.3 814.927   3
   2  -8  -8 9810.50 783.841   3
   2  -8  -7 14584.8 922.442   3
  -2  -8  -7 15239.8 946.402   3
  -2  -8  -6 11956.4 818.265   3
   2  -8  -6 11803.7 804.146   3
  -2  -8  -5 9823.78 721.663   3
   2  -8  -5 9207.90 693.303   3
  -2  -8  -4 15128.6 855.588   3
   2  -8  -4 14637.7 835.602   3
   2  -8  -3 15066.7 816.250   3
  -2  -8  -3 15001.4 822.980   3
   2  -8  -2 22865.9 980.308   3
  -2  -8  -2 21320.8 930.759   3
   2  -8  -1 10638.6 650.645   3
  -2  -8  -1 11051.2 647.885   3
   2  -8   0 14027.3 712.925   3
  -2  -8   0 13383.4 688.558   3
   2  -8   1 13274.8 667.405   3
  -2  -8   1 13306.0 649.513   3
   2  -8   2 20342.2 791.892   3
  -2  -8   2 21742.0 785.620   3
  -2  -8   3 13482.8 588.586   3
   2   8   3 13032.7 554.663   2
   2   8   4 15102.5 603.424   2
  -2  -8   4 15306.3 578.735   3
  -2  -8   5 9630.30 415.768   3
  -2   8  12 5864.53 682.755   1
  -2   8  13 1990.81 473.523   1
   2   8  13 2020.18 494.723   1
   2   8  14 1895.40 520.340   1
  -2   8  14 1421.21 429.975   1
  -2 -10 -13 4310.01 694.573   3
   2 -10 -12 525.309 312.602   3
  -2 -10 -12 450.171 313.171   3
  -2 -10 -11 10332.3 972.419   3
   2 -10 -11 11184.0 989.119   3
   2 -10 -10 557.464 305.723   3
  -2 -10 -10 744.161 339.637   3
  -2 -10  -9 10698.4 929.975   3
   2 -10  -9 10622.7 923.357   3
  -2 -10  -8 1563.65 401.730   3
   2 -10  -8 1754.32 407.998   3
  -2 -10  -7 14991.9 1020.90   3
   2 -10  -7 13813.9 986.764   3
  -2 -10  -6 2572.49 441.301   3
   2 -10  -6 2503.79 443.220   3
  -2 -10  -5 26634.4 1271.66   3
   2 -10  -5 24480.5 1224.99   3
  -2 -10  -4 434.771 244.019   3
   2 -10  -4 932.833 308.231   3
  -2 -10  -3 14318.8 883.288   3
   2 -10  -3 15212.8 921.948   3
   2 -10  -2 1624.41 346.510   3
  -2 -10  -2 1185.53 289.583   3
   2 -10  -1 32579.4 1254.50   3
  -2 -10  -1 32316.8 1231.06   3
   2 -10   0 399.499 203.477   3
  -2 -10   0 414.095 199.706   3
  -2 -10   1 33242.8 1158.28   3
   2 -10   1 34609.4 1211.80   3
   2 -10   2 1584.51 285.627   3
  -2 -10   2 1523.36 264.860   3
  -2  10   2 1175.27 90.5153   2
  -2 -10   3 14627.4 714.178   3
   2  10   3 14929.2 636.605   2
   2  10   4 593.980 154.513   2
  -2 -10   4 472.862 155.892   3
  -2 -10   5 27550.0 853.832   3
   2  10  14 247.730 350.934   1
  -2 -12 -13 942.705 435.691   3
   2 -12 -13 981.503 410.133   3
  -2 -12 -12 6120.21 844.114   3
   2 -12 -12 5314.18 758.617   3
  -2 -12 -11 1638.58 465.840   3
   2 -12 -11 1969.81 500.934   3
  -2 -12 -10 5067.48 722.497   3
   2 -12 -10 4476.80 685.177   3
  -2 -12  -9 2560.78 545.591   3
   2 -12  -9 2599.76 526.034   3
   2 -12  -8 9446.97 912.417   3
  -2 -12  -8 8746.16 892.138   3
  -2 -12  -7 791.847 340.129   3
   2 -12  -7 1382.36 423.927   3
   2 -12  -6 7147.21 767.549   3
  -2 -12  -6 6836.36 752.466   3
   2 -12  -5 8739.26 814.328   3
  -2 -12  -5 8805.49 811.721   3
   2 -12  -4 18634.4 1146.15   3
  -2 -12  -4 18167.0 1112.36   3
   2 -12  -3 668.240 288.329   3
  -2 -12  -3 644.417 279.192   3
   2 -12  -2 28924.0 1332.90   3
  -2 -12  -2 28890.3 1324.37   3
   2 -12  -1 5144.63 569.435   3
  -2 -12  -1 5084.13 561.754   3
  -2 -12   0 16071.0 940.627   3
   2 -12   0 15176.2 925.663   3
  -2 -12   1 5200.54 532.552   3
   2 -12   1 5871.51 565.844   3
  -2 -12   2 28588.6 1159.33   3
   2 -12   2 28258.9 1182.20   3
  -2 -12   3 1621.46 303.335   3
   2  12   3 1635.99 260.312   2
  -2 -12   4 20503.8 915.078   3
   2  12   4 20265.4 730.687   2
  -2 -12   5 8593.77 566.944   3
   2 -14 -12 2306.63 586.309   3
  -2 -14 -11 1154.83 450.067   3
   2 -14 -11 1127.90 449.135   3
   2 -14 -10 3869.47 706.868   3
  -2 -14 -10 3861.70 699.545   3
  -2 -14  -9 1633.30 486.228   3
   2 -14  -9 1255.57 453.289   3
   2 -14  -8 8457.48 945.925   3
  -2 -14  -8 7459.61 877.682   3
   2 -14  -7 1762.71 487.733   3
  -2 -14  -7 2060.18 503.793   3
  -2 -14  -6 5466.07 721.785   3
   2 -14  -6 5744.57 747.690   3
  -2 -14  -5 3419.83 590.377   3
   2 -14  -5 2464.25 495.769   3
   2 -14  -4 13540.7 1056.09   3
  -2 -14  -4 12834.4 1026.43   3
   2 -14  -3 3139.38 529.878   3
  -2 -14  -3 3102.99 537.178   3
   2 -14  -2 14061.1 1016.59   3
  -2 -14  -2 13753.7 1008.43   3
  -2 -14  -1 10780.6 867.050   3
   2 -14  -1 10379.7 868.593   3
  -2 -14   0 8354.42 756.685   3
   2 -14   0 9422.06 806.299   3
   2 -14   1 10444.0 827.064   3
  -2 -14   1 10863.0 831.258   3
  -2 -14   2 12880.1 889.038   3
  -2 -14   3 3197.59 445.330   3
  -2 -14   4 14610.5 868.414   3
   2 -16  -9 7135.28 946.348   3
  -2 -16  -9 8806.43 1069.14   3
   2 -16  -8 454.850 349.079   3
  -2 -16  -8 405.708 368.536   3
   2 -16  -7 7708.68 926.621   3
  -2 -16  -7 7902.17 957.792   3
  -2 -16  -6-122.256 305.492   3
   2 -16  -6 209.364 306.614   3
  -2 -16  -5 14157.6 1196.00   3
   2 -16  -5 14929.8 1226.18   3
  -2 -16  -4 302.431 278.489   3
   2 -16  -4 806.138 361.856   3
   2 -16  -3 7690.54 855.659   3
  -2 -16  -3 7878.38 861.516   3
   2 -16  -2 1008.31 393.044   3
  -2 -16  -2 284.670 241.303   3
   2 -16  -1 9954.46 925.718   3
  -2 -16  -1 10196.0 939.926   3
   2 -16   0-62.9935 242.023   3
  -2 -16   0 62.8183 245.509   3
   2 -16   1 10920.7 915.059   3
  -2 -16   1 9864.31 878.316   3
  -2 -16   2 339.908 248.279   3
  -2 -16   3 8005.21 749.215   3
  -2 -16   4 73.6735 180.575   3
   2 -18  -7 3384.20 709.749   3
  -2 -18  -7 3108.51 668.702   3
   2 -18  -6 8212.04 1016.99   3
  -2 -18  -6 7374.88 987.657   3
  -2 -18  -5 1320.88 456.936   3
   2 -18  -5 1428.53 500.825   3
   2 -18  -4 5361.58 800.110   3
  -2 -18  -4 5593.93 814.977   3
   2 -18  -3 3951.11 695.607   3
  -2 -18  -3 3922.50 697.277   3
   2 -18  -2 1333.88 444.250   3
  -2 -18  -2 1439.40 445.095   3
  -2 -18  -1 2951.24 587.276   3
   2 -18  -1 2695.00 570.032   3
  -2 -18   0 8387.77 901.790   3
  -2 -18   1 3730.64 608.416   3
  -2 -18   2 2056.49 457.417   3
  -2 -18   3 3512.36 563.144   3
  -2 -20  -3 833.583 451.303   3
   2 -20  -3 1410.97 488.173   3
  -2 -20  -2 6784.24 903.857   3
  -2 -20  -1 930.709 405.765   3
  -2 -20   0 5002.01 771.224   3
  -2 -20   1 711.732 349.913   3
  -2 -20   2 6744.64 825.637   3
  -3  -1 -10 5522.34 455.316   3
  -3  -1  -9 23619.9 879.019   3
  -3   1  -9 22927.2 745.189   3
  -3   1  -8 5660.14 366.733   3
  -3  -1  -8 5790.55 431.084   3
  -3   1  -7 17903.7 606.306   3
  -3  -1  -7 17019.9 696.383   3
  -3  -1  -6 7722.26 444.670   3
  -3   1  -6 7713.04 388.808   3
  -3  -1  -5 50996.9 1064.47   3
  -3  -1  -4 15456.0 563.945   3
   3   1  -3 7672.73 287.378   1
  -3   1  -2 12653.8 457.422   2
  -3  -1  -2 13347.0 485.914   2
   3   1  -2 13114.3 286.588   1
  -3   1  -2 12417.4 435.876   1
  -3   1  -1 13105.0 371.459   1
  -3   1  -1 13302.8 413.276   2
   3  -1   0 16734.5 393.486   2
   3  -1   1 15432.2 432.587   2
   3  -1   1 14361.2 385.885   1
   3   1   1 15592.7 472.628   2
   3   1   2 12144.0 461.541   2
   3  -1   2 12287.2 429.474   1
   3  -1   3 7558.97 395.674   1
  -3   1   3 7322.73 334.350   3
   3   1   3 7243.29 405.591   2
   3  -1   4 15526.2 619.126   1
  -3   1   4 16039.4 511.516   3
  -3  -1   4 16327.6 382.450   3
  -3  -1   4 16181.4 488.337   1
   3  -1   5 51013.1 1223.86   1
   3   1   5 49723.3 1200.68   1
  -3  -1   5 50050.0 694.116   3
  -3  -1   5 49142.9 974.006   1
  -3   1   5 50261.0 988.982   1
  -3  -1   6 6441.25 262.307   3
  -3   1   6 6412.01 406.137   1
   3  -1   6 6021.07 474.696   1
   3   1   6 6734.42 503.616   1
  -3  -1   6 6504.67 411.526   1
  -3  -1   7 18502.2 457.048   3
   3  -1   7 17807.9 855.726   1
  -3   1   7 19373.2 761.953   1
  -3  -1   7 19733.7 762.843   1
   3   1   7 19606.9 893.404   1
  -3   1   8 5663.66 460.959   1
  -3  -1   8 6400.79 489.906   1
  -3  -1   8 5895.87 270.284   3
   3   1   8 5785.07 532.659   1
   3  -1   8 6266.28 552.127   1
   3  -1   9 23385.9 1106.02   1
  -3   1   9 22591.8 960.999   1
  -3  -1   9 23516.3 973.601   1
   3   1   9 22478.4 1091.18   1
   3   1  10 4747.66 565.100   1
  -3   1  10 5481.15 523.526   1
  -3  -1  10 4878.34 494.580   1
   3  -1  10 5181.86 578.216   1
  -3   1  11 15698.1 911.129   1
   3  -1  11 15452.7 1011.80   1
   3   1  11 16180.7 1040.98   1
  -3  -1  11 15856.1 910.127   1
   3  -1  12 2333.12 477.441   1
   3   1  12 1752.36 406.173   1
  -3   1  12 1838.08 368.060   1
  -3   1  13 5682.71 635.717   1
   3   1  13 5728.35 712.834   1
   3  -1  13 5705.80 713.332   1
   3  -1  14 2957.43 565.830   1
   3   1  14 3187.62 586.084   1
  -3   1  14 3376.81 553.075   1
   3   1  15 6774.22 841.037   1
  -3  -3 -11 2019.34 333.329   3
  -3  -3 -10 12281.5 752.450   3
   3  -3  -9 1454.36 270.559   3
  -3  -3  -9 969.031 231.187   3
   3  -3  -8 23891.5 904.615   3
  -3  -3  -8 22476.9 943.621   3
  -3   3  -8 23762.7 604.908   3
   3  -3  -7 2059.67 275.840   3
  -3  -3  -7 1764.43 275.991   3
  -3   3  -7 1879.17 180.406   3
   3  -3  -6 40524.9 1087.65   3
  -3  -3  -6 40333.8 1151.15   3
   3  -3  -5 435.961 144.816   3
  -3  -3  -5 495.355 163.716   3
  -3  -3  -4 36842.8 984.693   3
   3  -3  -4 38154.2 960.329   3
   3  -3  -3 509.080 157.128   3
  -3  -3  -3 438.483 162.377   3
  -3  -3  -2 32828.5 828.803   3
   3  -3  -2 33353.9 820.458   3
  -3  -3  -1 21796.5 641.791   3
  -3   3  -1 21704.9 520.524   2
  -3  -3   0 51857.5 908.392   3
  -3   3   0 56216.9 665.969   2
  -3  -3   1 22628.5 546.762   3
  -3  -3   2 28626.0 554.882   3
   3   3   2 28187.1 735.727   2
   3   3   3 347.715 142.476   2
  -3  -3   4 36354.9 442.682   3
   3  -3   6 36879.5 1151.35   1
   3  -3   7 2245.70 353.916   1
  -3   3   8 24091.8 945.546   1
   3  -3   8 24025.9 1064.66   1
   3   3   8 23749.3 1060.27   1
   3   3   9 762.986 269.652   1
  -3   3   9 641.986 227.782   1
   3  -3   9 831.066 291.799   1
  -3   3  10 12579.3 796.825   1
   3   3  10 13515.9 916.353   1
   3   3  11 2785.63 487.454   1
  -3   3  11 2431.26 403.227   1
  -3   3  12 10466.0 809.880   1
   3   3  12 11118.2 929.253   1
  -3   3  13 191.250 227.332   1
   3   3  13 200.483 297.005   1
   3   3  14 10712.5 1006.82   1
   3   3  15 394.948 360.347   1
  -3  -5 -12 3867.51 503.316   3
   3  -5 -11 6455.21 596.356   3
  -3  -5 -11 6046.41 609.974   3
   3  -5 -10 2602.81 382.466   3
  -3  -5 -10 2231.84 386.242   3
  -3  -5  -9 16889.4 938.158   3
   3  -5  -9 16103.1 879.967   3
  -3   5  -8 12586.1 374.180   3
   3  -5  -8 11680.4 731.399   3
  -3  -5  -8 13288.6 809.394   3
  -3  -5  -7 14179.0 807.043   3
   3  -5  -7 13453.2 751.938   3
  -3   5  -7 13575.6 426.237   3
   3  -5  -6 3622.22 396.124   3
  -3  -5  -6 3575.23 409.866   3
   3  -5  -5 10236.4 621.444   3
  -3  -5  -5 10772.3 651.358   3
  -3  -5  -4 4969.88 435.587   3
   3  -5  -4 5606.60 450.127   3
  -3  -5  -3 36768.2 1074.62   3
   3  -5  -3 36928.4 1058.58   3
   3  -5  -3 37152.4 455.123   2
   3  -5  -2 39281.6 1045.93   3
  -3  -5  -2 39448.7 1060.23   3
   3  -5  -1 27474.7 850.142   3
  -3  -5  -1 29388.8 865.769   3
  -3  -5   0 1109.67 198.823   3
  -3  -5   1 27446.0 734.347   3
  -3  -5   2 38512.8 808.982   3
   3   5   2 35320.1 863.701   2
  -3  -5   3 38029.5 723.626   3
   3   5   3 37229.5 930.638   2
  -3  -5   4 7836.22 288.606   3
   3   5   4 8112.92 461.383   2
  -3   5  10 3904.38 476.916   1
   3   5  10 3463.48 504.348   1
   3   5  11 6264.62 698.844   1
  -3   5  11 6011.94 613.556   1
  -3   5  12 4755.10 587.812   1
   3   5  12 4367.84 617.569   1
   3   5  13 5225.75 715.440   1
  -3   5  13 5363.19 649.018   1
   3   5  14 1626.20 461.935   1
   3   5  15 2617.61 616.023   1
  -3  -7 -12 1172.17 334.295   3
  -3  -7 -11 6916.58 721.847   3
   3  -7 -11 5683.21 626.787   3
  -3  -7 -10 2837.90 468.084   3
   3  -7 -10 2496.47 429.466   3
  -3  -7  -9 5157.24 591.500   3
   3  -7  -9 3694.18 481.917   3
  -3  -7  -8 2439.52 403.844   3
   3  -7  -8 2544.45 403.138   3
   3  -7  -7 22208.7 1079.66   3
  -3  -7  -7 25080.6 1166.22   3
  -3  -7  -6 2867.16 411.036   3
   3  -7  -6 3679.28 453.456   3
   3  -7  -5 17555.5 901.912   3
  -3  -7  -5 16980.5 895.361   3
   3  -7  -5 16294.2 462.911   2
   3  -7  -4 5249.91 496.082   3
  -3  -7  -4 4501.48 466.637   3
   3  -7  -3 28962.0 1079.01   3
  -3  -7  -3 29739.6 1094.35   3
  -3  -7  -2 4596.80 439.174   3
   3  -7  -2 4955.67 451.920   3
   3  -7  -1 28560.5 991.689   3
  -3  -7  -1 27534.5 964.490   3
  -3  -7   0 8769.35 533.789   3
   3  -7   0 8873.24 544.994   3
  -3  -7   1 31542.1 944.788   3
  -3  -7   2 5476.88 379.636   3
   3   7   3 28361.3 864.543   2
  -3  -7   3 30210.1 807.786   3
  -3  -7   4 5013.94 309.717   3
   3   7   4 4962.04 384.495   2
  -3  -7   5 17797.2 496.959   3
   3   7   5 17674.3 727.571   2
   3   7  12 2029.16 489.133   1
  -3   7  12 2032.55 416.220   1
  -3   7  13 4611.79 627.983   1
   3   7  13 4814.82 707.059   1
   3   7  14 19.6801 304.159   1
   3   7  15 2185.78 589.133   1
  -3  -9 -13 356.851 273.332   3
  -3  -9 -12 4100.63 617.298   3
   3  -9 -12 3534.71 574.075   3
  -3  -9 -11 1392.57 402.582   3
   3  -9 -11 1275.62 392.307   3
   3  -9 -10 4140.19 594.843   3
  -3  -9 -10 4651.90 631.037   3
   3  -9  -9 1990.31 428.993   3
  -3  -9  -9 2136.58 442.092   3
   3  -9  -8 7288.18 714.306   3
  -3  -9  -8 6669.55 694.908   3
  -3  -9  -7 30.8209 214.198   3
   3  -9  -7 181.233 239.817   3
  -3  -9  -6 24406.6 1213.01   3
   3  -9  -6 24801.9 1215.36   3
   3  -9  -5 2426.60 410.227   3
  -3  -9  -5 2964.85 445.405   3
   3  -9  -4 21117.7 1064.20   3
  -3  -9  -4 19791.6 1027.81   3
  -3  -9  -3 2722.92 398.370   3
   3  -9  -3 2787.22 405.245   3
   3  -9  -2 22329.7 1023.16   3
  -3  -9  -2 21685.2 1005.35   3
   3  -9  -1 809.903 255.193   3
  -3  -9  -1 808.072 241.954   3
   3  -9   0 23843.9 999.614   3
  -3  -9   0 23596.6 964.934   3
  -3  -9   1 625.998 193.146   3
   3  -9   1 532.793 199.736   3
  -3  -9   2 22828.3 875.364   3
  -3  -9   3 3126.34 321.141   3
   3   9   3 3892.15 370.508   2
  -3  -9   4 18953.2 709.578   3
   3   9   4 17252.0 721.647   2
  -3  -9   5 3395.73 286.266   3
   3   9   5 3258.31 331.698   2
   3   9  13 365.099 325.311   1
  -3   9  13 1118.55 398.478   1
   3   9  14 1244.05 423.218   1
  -3 -11 -13 1873.97 517.035   3
   3 -11 -12 3972.15 648.724   3
  -3 -11 -12 3686.54 646.606   3
  -3 -11 -11 2722.83 556.277   3
   3 -11 -11 2466.39 516.913   3
  -3 -11 -10 7507.96 846.163   3
   3 -11 -10 6845.12 799.386   3
   3 -11  -9 2626.94 512.225   3
  -3 -11  -9 2795.00 527.490   3
   3 -11  -8 3459.71 559.051   3
  -3 -11  -8 3219.63 546.138   3
   3 -11  -7 3800.31 558.262   3
  -3 -11  -7 3780.75 557.410   3
   3 -11  -6 10868.2 886.577   3
  -3 -11  -6 10608.3 888.004   3
  -3 -11  -5 627.938 300.278   3
   3 -11  -5 805.071 313.242   3
   3 -11  -4 8820.97 764.890   3
  -3 -11  -4 8058.24 724.244   3
  -3 -11  -3 15203.0 964.727   3
   3 -11  -3 13896.9 918.174   3
   3 -11  -2 4734.76 543.423   3
  -3 -11  -2 5272.87 573.731   3
   3 -11  -1 5007.39 542.591   3
  -3 -11  -1 4881.99 528.733   3
  -3 -11   0 30959.7 1229.44   3
   3 -11   0 30706.1 1253.15   3
   3 -11   1 5383.27 532.480   3
  -3 -11   1 4805.07 487.109   3
  -3 -11   2 6238.32 531.011   3
  -3 -11   3 14054.4 751.477   3
   3  11   3 14396.5 691.748   2
  -3 -11   4 7346.25 523.678   3
   3  11   4 6642.96 477.742   2
   3  11   5 1628.42 247.114   2
  -3 -11   5 1721.32 247.810   3
   3 -13 -12 675.808 406.075   3
  -3 -13 -12 725.311 375.121   3
   3 -13 -11 4343.58 723.389   3
  -3 -13 -11 5434.59 801.350   3
   3 -13 -10 149.160 274.241   3
  -3 -13 -10 241.910 302.180   3
   3 -13  -9 12019.0 1095.16   3
  -3 -13  -9 13601.9 1179.35   3
  -3 -13  -8 618.934 335.589   3
   3 -13  -8 354.519 306.382   3
  -3 -13  -7 9104.07 922.778   3
   3 -13  -7 8240.60 861.644   3
   3 -13  -6 193.309 253.064   3
  -3 -13  -6-6.29329 251.221   3
  -3 -13  -5 12397.9 999.427   3
   3 -13  -5 11527.6 969.554   3
   3 -13  -4 731.239 316.429   3
  -3 -13  -4 636.454 309.475   3
  -3 -13  -3 11797.3 925.072   3
   3 -13  -3 11373.8 926.083   3
   3 -13  -2 591.686 293.552   3
  -3 -13  -2 731.268 303.929   3
  -3 -13  -1 10000.9 808.298   3
   3 -13  -1 10109.8 824.137   3
  -3 -13   0 196.052 233.244   3
   3 -13   0 228.489 232.336   3
  -3 -13   1 7669.03 671.099   3
  -3 -13   2 807.771 268.413   3
  -3 -13   3 11808.8 774.500   3
   3  13   3 11951.9 657.288   2
  -3 -13   4 860.160 233.881   3
  -3 -13   5 10953.9 673.789   3
  -3 -15 -10 5505.63 834.861   3
   3 -15 -10 6593.81 904.679   3
   3 -15  -9 3081.53 646.352   3
  -3 -15  -9 3173.73 667.369   3
   3 -15  -8 6075.96 839.617   3
  -3 -15  -8 6504.52 874.654   3
   3 -15  -7 3807.77 672.909   3
  -3 -15  -7 4244.36 695.019   3
  -3 -15  -6 9099.51 964.304   3
   3 -15  -6 7634.41 882.763   3
  -3 -15  -5 1294.65 405.676   3
   3 -15  -5 1592.93 448.227   3
   3 -15  -4 8002.38 866.937   3
  -3 -15  -4 8186.37 871.458   3
  -3 -15  -3 3819.95 612.420   3
   3 -15  -3 3626.35 591.746   3
  -3 -15  -2 4413.78 628.553   3
   3 -15  -2 5014.14 667.267   3
  -3 -15  -1 3522.30 554.798   3
   3 -15  -1 2533.18 493.805   3
   3 -15   0 5391.35 661.330   3
  -3 -15   0 5357.87 634.542   3
  -3 -15   1 2645.75 457.858   3
  -3 -15   2 2948.56 473.406   3
  -3 -15   3 3801.62 508.900   3
  -3 -15   4 8356.78 700.553   3
  -3 -17  -8 4695.53 790.266   3
   3 -17  -8 4462.87 778.507   3
   3 -17  -7 163.453 277.092   3
  -3 -17  -7 244.608 280.363   3
   3 -17  -6 5671.69 846.745   3
  -3 -17  -6 5340.72 810.387   3
   3 -17  -5 5593.75 814.680   3
  -3 -17  -5 4487.97 722.327   3
   3 -17  -4 5935.48 816.182   3
  -3 -17  -4 5532.53 789.228   3
  -3 -17  -3 244.100 288.832   3
   3 -17  -3-132.007 288.203   3
  -3 -17  -2 6715.69 824.794   3
   3 -17  -2 7136.84 847.737   3
   3 -17  -1 1603.52 441.295   3
  -3 -17  -1 1472.57 439.767   3
  -3 -17   0 9182.63 896.924   3
  -3 -17   1 1765.00 427.322   3
  -3 -17   2 8578.56 837.719   3
  -3 -17   3-81.3690 195.387   3
   3 -19  -5 6979.65 945.894   3
  -3 -19  -5 5642.42 889.423   3
   3 -19  -4 158.641 333.592   3
  -3 -19  -4 333.282 363.684   3
  -3 -19  -3 5458.12 822.924   3
  -3 -19  -2 551.148 372.669   3
  -3 -19  -1 6838.18 871.896   3
  -3 -19   0 104.557 263.830   3
  -3 -19   1 8259.03 905.914   3
  -3 -19   2 1235.31 421.161   3
  -3 -21  -1 2890.89 650.796   3
  -3 -21   0 1314.82 467.263   3
  -3 -21   1 4075.23 702.649   3
  -4   0 -10 26847.4 947.210   3
  -4   0  -9-1.20505 120.002   3
  -4   0  -8 9553.13 533.795   3
  -4   0  -7 8.61320 109.211   3
  -4   0  -6 49566.7 1105.27   3
  -4   0  -1 1418.69 235.372   2
   4   0   0 119597. 855.195   1
   4   0   1 53.5023 87.2557   1
   4   0   1 284.458 187.324   2
   4   0   2 11513.2 487.236   2
   4   0   2 11809.7 442.827   1
  -4   0   3 93.5690 65.9774   1
   4   0   3 112.523 144.764   1
   4   0   3-36.4255 142.190   2
  -4   0   4 64627.2 977.590   3
  -4   0   4 64112.1 888.195   1
   4   0   4 64957.5 1287.19   1
  -4   0   5 34.3030 101.617   1
   4   0   5 10.2990 153.239   1
  -4   0   5 125.415 82.1375   3
   4   0   6 47051.0 1302.57   1
  -4   0   6 49245.0 1040.15   1
  -4   0   7-32.9654 121.934   1
   4   0   7 32.1710 177.884   1
  -4   0   8 12339.9 637.777   1
   4   0   8 13146.3 805.643   1
  -4   0   9 35.3485 150.799   1
   4   0   9-176.614 242.689   1
   4   0  10 25654.6 1242.67   1
  -4   0  10 25759.2 1063.97   1
  -4   0  11-45.7219 197.250   1
   4   0  11 238.065 268.426   1
   4   0  12 10367.9 894.815   1
  -4   0  12 10663.3 778.064   1
   4   0  13 177.862 299.013   1
   4   0  14 8294.40 885.865   1
   4   0  15 18.9134 289.869   1
  -4  -2 -11 8220.86 616.335   3
  -4  -2 -10 5426.69 492.626   3
  -4   2  -9 25147.5 770.533   3
  -4  -2  -9 25452.0 1010.65   3
  -4   2  -8 4866.49 341.458   3
  -4  -2  -8 5112.60 446.177   3
  -4  -2  -7 18488.4 794.561   3
  -4   2  -7 18525.3 644.113   3
  -4  -2  -6 14968.6 682.692   3
  -4  -2  -5 24088.9 824.804   3
  -4  -2  -4 8266.97 469.770   3
   4   2  -3 25915.5 543.053   1
  -4  -2  -3 26388.9 784.500   3
  -4   2  -1 52106.7 892.302   2
  -4   2  -1 50385.8 824.389   1
   4  -2   0 20944.9 496.960   2
   4  -2   1 43072.4 785.522   2
   4   2   2 19054.2 648.503   2
   4   2   3 28398.3 825.142   2
   4  -2   3 27643.7 781.459   1
   4   2   4 7495.40 469.354   2
   4  -2   4 7528.15 466.331   1
  -4  -2   5 24111.9 470.566   3
   4  -2   5 24393.4 887.852   1
   4  -2   6 17369.3 807.159   1
  -4  -2   6 15975.0 375.452   3
  -4   2   6 16365.0 626.346   1
   4   2   7 17513.6 867.286   1
   4  -2   7 17663.0 870.758   1
  -4   2   7 17653.4 720.246   1
  -4  -2   7 15870.0 346.476   3
  -4   2   8 4800.23 414.644   1
   4  -2   8 5671.23 546.968   1
   4   2   8 4781.72 511.108   1
  -4   2   9 26724.4 1032.56   1
   4   2   9 25856.3 1199.38   1
   4  -2   9 27264.8 1217.30   1
   4  -2  10 5796.45 620.201   1
   4   2  10 5865.27 626.323   1
  -4   2  10 5486.14 515.107   1
  -4   2  11 6045.40 579.066   1
   4  -2  11 6010.08 666.935   1
   4   2  11 6393.76 686.064   1
   4   2  12 5323.89 666.700   1
  -4   2  12 4659.69 541.328   1
   4  -2  12 5487.66 671.751   1
   4   2  13 6888.95 779.390   1
  -4   2  13 6956.05 690.632   1
   4   2  14 1447.15 444.969   1
   4   2  15 3134.93 599.785   1
  -4  -4 -11 11375.8 802.400   3
  -4  -4 -10 2768.68 410.541   3
  -4  -4  -9 14469.7 847.211   3
  -4   4  -8 3781.82 271.232   3
  -4  -4  -8 3319.22 411.023   3
   4  -4  -8 3398.97 388.591   3
  -4  -4  -7 24613.6 1021.75   3
   4  -4  -7 25724.8 989.227   3
  -4  -4  -6 9081.60 603.306   3
   4  -4  -6 8742.93 560.745   3
  -4  -4  -5 20503.2 854.563   3
   4  -4  -5 20324.0 813.061   3
  -4  -4  -4 12265.2 639.158   3
   4  -4  -4 12418.8 620.146   3
  -4  -4  -3 47514.8 1176.33   3
  -4  -4  -2 7510.93 458.912   3
  -4  -4  -1 26878.9 803.397   3
  -4   4  -1 29689.2 666.937   2
   4  -4  -1 28478.7 409.198   2
  -4   4   0 8496.90 306.869   2
  -4  -4   0 8098.27 431.672   3
  -4  -4   1 30553.2 755.839   3
   4   4   2 6788.47 433.178   2
  -4  -4   2 6480.89 332.209   3
   4   4   3 48188.9 1120.16   2
  -4  -4   3 50238.6 815.433   3
  -4  -4   4 11654.4 346.722   3
   4   4   4 11291.1 574.670   2
  -4  -4   5 21532.5 377.573   3
   4   4   9 15840.6 962.677   1
  -4   4   9 15217.7 807.571   1
   4   4  10 2285.20 420.138   1
  -4   4  10 2875.46 394.480   1
   4   4  11 10102.6 864.371   1
  -4   4  11 10691.4 774.040   1
  -4   4  12 708.571 282.140   1
   4   4  12 856.799 387.134   1
   4   4  13 7552.55 839.488   1
  -4   4  13 7190.85 721.064   1
   4   4  14 1642.62 511.649   1
   4   4  15 4123.37 699.771   1
  -4  -6 -12 9769.19 829.672   3
  -4  -6 -11 553.941 269.512   3
  -4  -6 -10 4496.17 551.156   3
  -4  -6  -9 463.046 242.310   3
   4  -6  -9 617.267 253.358   3
   4  -6  -8 18814.7 981.372   3
  -4  -6  -8 19330.9 1035.89   3
   4  -6  -7 1763.53 328.312   3
  -4  -6  -7 1687.19 328.300   3
   4  -6  -6 18969.5 919.168   3
  -4  -6  -6 17518.6 923.939   3
  -4  -6  -5 3435.30 415.918   3
   4  -6  -5 3233.93 390.252   3
   4  -6  -4 27145.2 1027.02   3
   4  -6  -4 25837.1 450.722   2
  -4  -6  -4 24178.7 996.067   3
  -4  -6  -3 8894.21 589.767   3
   4  -6  -3 8577.02 570.782   3
  -4  -6  -2 70865.0 1548.62   3
   4  -6  -2 71692.5 1553.05   3
  -4  -6  -1 1598.66 247.039   3
  -4  -6   0 36302.5 1005.86   3
  -4   6   0 39204.2 652.907   2
  -4  -6   1 1963.66 239.495   3
  -4  -6   2 69704.3 1244.91   3
   4   6   3 9858.68 548.839   2
  -4  -6   3 10170.7 442.800   3
  -4  -6   4 27895.7 661.873   3
   4   6   4 26578.6 898.468   2
  -4  -6   5 4108.14 221.519   3
   4   6   5 3736.06 363.882   2
   4   6  11 624.236 326.105   1
  -4   6  11 505.196 265.234   1
   4   6  12 9078.79 899.518   1
  -4   6  12 8968.31 776.780   1
   4   6  13 1166.80 371.341   1
   4   6  14 5134.56 763.112   1
   4   6  15 303.693 314.650   1
  -4  -8 -12 3208.85 545.342   3
  -4  -8 -11 6582.53 738.256   3
  -4  -8 -10 2932.10 503.341   3
   4  -8 -10 3036.54 489.837   3
   4  -8  -9 4255.24 553.533   3
  -4  -8  -9 4663.88 585.894   3
  -4  -8  -8 7192.42 705.989   3
   4  -8  -8 7451.62 695.910   3
   4  -8  -7 5845.70 604.625   3
  -4  -8  -7 5063.13 580.700   3
  -4  -8  -6 8099.47 692.292   3
   4  -8  -6 6955.38 629.082   3
   4  -8  -5 13055.9 828.400   3
  -4  -8  -5 12745.2 832.218   3
  -4  -8  -4 11941.4 782.376   3
   4  -8  -4 11896.9 771.894   3
   4  -8  -3 15729.4 854.047   3
  -4  -8  -3 16039.3 870.678   3
   4  -8  -2 26902.1 1080.16   3
  -4  -8  -2 28042.9 1096.41   3
  -4  -8  -1 41836.7 1283.82   3
   4  -8  -1 40966.2 1285.74   3
  -4  -8   0 23929.5 940.389   3
  -4  -8   1 47050.4 1246.88   3
  -4  -8   2 28604.7 931.703   3
  -4  -8   3 15421.8 652.798   3
   4   8   3 14297.3 688.214   2
  -4  -8   4 10762.9 505.949   3
   4   8   4 10163.0 584.724   2
  -4  -8   5 13150.9 502.494   3
   4   8   5 13471.8 678.526   2
  -4  -8   6 8318.76 334.629   3
  -4   8  12 3602.74 557.288   1
   4   8  12 3323.77 611.394   1
   4   8  13 948.855 409.611   1
   4   8  14 2302.84 549.354   1
  -4 -10 -13 2785.30 582.111   3
  -4 -10 -12 1514.25 450.439   3
  -4 -10 -11 8169.52 884.633   3
   4 -10 -11 8722.44 887.661   3
  -4 -10 -10 137.188 249.383   3
   4 -10 -10 320.659 293.931   3
  -4 -10  -9 7284.38 781.867   3
   4 -10  -9 6998.06 754.708   3
  -4 -10  -8 1766.74 425.424   3
   4 -10  -8 1005.40 316.769   3
  -4 -10  -7 12940.8 962.555   3
   4 -10  -7 13487.2 978.253   3
  -4 -10  -6 1793.30 398.212   3
   4 -10  -6 1789.22 377.928   3
   4 -10  -5 28835.1 1334.24   3
  -4 -10  -5 29654.3 1370.00   3
  -4 -10  -4 1530.29 359.373   3
   4 -10  -4 1136.58 314.336   3
   4 -10  -3 22355.5 1118.79   3
  -4 -10  -3 20496.3 1070.97   3
   4 -10  -2 8982.36 703.672   3
  -4 -10  -2 8457.30 683.257   3
   4 -10  -1 23961.5 1106.59   3
  -4 -10  -1 24723.4 1098.26   3
  -4 -10   0 137.339 161.195   3
  -4 -10   1 25951.3 1049.97   3
  -4  10   1 24824.9 407.492   2
  -4 -10   2 9261.16 612.927   3
   4  10   3 18605.2 820.849   2
  -4 -10   3 19720.7 842.767   3
   4  10   4 1325.82 254.166   2
  -4 -10   4 1530.60 243.764   3
  -4 -10   5 27321.1 872.518   3
   4  10   5 27375.3 983.755   2
   4  10  13 3513.98 666.605   1
  -4 -12 -13 389.315 355.090   3
  -4 -12 -12 3419.52 663.142   3
  -4 -12 -11 2043.59 547.750   3
  -4 -12 -10 6218.02 808.888   3
   4 -12 -10 5128.23 737.873   3
   4 -12  -9 4416.22 674.419   3
  -4 -12  -9 4226.43 663.623   3
  -4 -12  -8 12290.0 1064.25   3
   4 -12  -8 11841.4 1021.97   3
  -4 -12  -7 858.836 366.591   3
   4 -12  -7 1333.37 391.342   3
   4 -12  -6 12001.6 969.598   3
  -4 -12  -6 11862.1 976.462   3
   4 -12  -5 7149.56 750.651   3
  -4 -12  -5 7173.28 749.228   3
   4 -12  -4 14255.4 1008.10   3
  -4 -12  -4 12391.3 946.462   3
   4 -12  -3 933.738 303.411   3
  -4 -12  -3 858.615 310.411   3
   4 -12  -2 14762.3 971.081   3
  -4 -12  -2 15888.6 1004.36   3
   4 -12  -1 3905.30 517.363   3
  -4 -12  -1 3845.42 498.300   3
  -4 -12   0 11197.0 794.573   3
  -4 -12   1 3344.95 441.002   3
  -4 -12   2 14124.4 836.523   3
  -4 -12   3 723.862 229.197   3
   4  12   3 1219.86 302.008   2
   4  12   4 13042.6 719.147   2
  -4 -12   4 13203.0 742.123   3
  -4 -12   5 6268.27 489.971   3
   4  12   5 5632.77 462.638   2
  -4 -14 -11 1528.01 499.023   3
   4 -14 -10 4447.02 749.456   3
  -4 -14 -10 4571.77 767.306   3
  -4 -14  -9 3791.36 684.500   3
   4 -14  -9 2786.69 601.714   3
   4 -14  -8 6640.76 835.330   3
  -4 -14  -8 6847.31 864.752   3
   4 -14  -7 4172.35 672.454   3
  -4 -14  -7 3817.04 642.291   3
   4 -14  -6 5304.62 718.847   3
  -4 -14  -6 6192.54 782.959   3
  -4 -14  -5 3327.14 575.349   3
   4 -14  -5 3592.86 597.919   3
   4 -14  -4 9891.29 920.869   3
  -4 -14  -4 9898.02 911.385   3
   4 -14  -3 3879.29 581.896   3
  -4 -14  -3 3611.93 567.373   3
   4 -14  -2 12541.5 976.040   3
  -4 -14  -2 12194.4 971.804   3
  -4 -14  -1 1235.86 359.124   3
   4 -14  -1 1679.58 395.223   3
  -4 -14   0 12471.0 919.768   3
  -4 -14   1 1111.15 325.137   3
  -4 -14   2 11197.6 815.729   3
  -4 -14   3 4323.72 512.752   3
  -4 -14   4 11632.2 780.840   3
   4 -16  -9 7066.31 943.455   3
  -4 -16  -9 6223.86 901.807   3
   4 -16  -8 596.732 386.479   3
  -4 -16  -8 183.044 293.016   3
   4 -16  -7 5100.52 796.421   3
  -4 -16  -7 5647.00 811.006   3
  -4 -16  -6 85.9194 289.653   3
   4 -16  -6 175.907 314.510   3
   4 -16  -5 11215.8 1077.70   3
  -4 -16  -5 11931.0 1113.09   3
   4 -16  -4-41.2744 267.002   3
  -4 -16  -4 282.735 301.865   3
   4 -16  -3 6678.11 802.431   3
  -4 -16  -3 7826.40 864.317   3
  -4 -16  -2 2444.87 529.843   3
  -4 -16  -1 9980.43 932.509   3
  -4 -16   0 37.5569 251.252   3
  -4 -16   1 10407.8 902.289   3
  -4 -16   2 1974.10 407.533   3
  -4 -16   3 9663.05 818.429   3
  -4 -18  -6 4566.13 778.512   3
  -4 -18  -5 2728.09 592.860   3
  -4 -18  -4 3709.87 689.243   3
  -4 -18  -3 3117.44 613.235   3
  -4 -18  -2 2935.58 592.280   3
  -4 -18  -1 2889.41 557.221   3
  -4 -18   0 8669.82 917.631   3
  -4 -18   1 3744.08 607.290   3
  -4 -18   2 2150.71 478.086   3
  -4 -20  -3 922.758 436.671   3
  -4 -20  -2 5406.96 833.463   3
  -4 -20  -1 1054.35 419.058   3
  -4 -20   0 4697.23 753.255   3
  -4 -20   1 704.339 371.007   3
  -5   1 -10 4809.70 404.092   3
  -5  -1 -10 4837.38 462.132   3
  -5   1  -9 21428.3 814.714   3
  -5  -1  -9 21393.9 913.604   3
  -5  -1  -8 5015.63 433.986   3
  -5   1  -8 5311.20 409.176   3
  -5   1  -7 22451.8 800.075   3
  -5  -1  -7 21208.0 841.145   3
  -5  -1  -6 10712.5 583.391   3
   5   1  -4 10092.8 348.933   1
   5   1  -3 3305.22 161.532   1
  -5   1  -1 28389.7 615.784   1
  -5   1   0 859.456 111.577   1
   5   1   1 28396.8 778.768   2
   5  -1   1 27365.0 601.028   1
  -5   1   1 27498.2 350.512   1
   5  -1   1 28420.9 737.893   2
   5  -1   2 419.427 141.481   2
   5   1   2 321.666 169.294   2
   5  -1   2 440.311 137.011   1
   5   1   3 2586.27 285.868   2
   5  -1   3 3181.97 290.833   1
  -5   1   4 9796.52 332.874   1
   5  -1   4 9452.29 526.363   1
   5   1   4 9822.56 556.364   2
   5   1   4 10082.5 529.621   1
   5  -1   5 45864.5 1221.63   1
  -5  -1   5 44202.8 828.935   3
  -5   1   5 43685.5 840.727   1
   5   1   5 46018.1 1226.28   1
   5  -1   6 8548.34 587.435   1
  -5  -1   6 7689.43 352.237   3
  -5   1   6 8594.49 426.931   1
   5   1   6 8217.70 577.277   1
  -5   1   7 24094.2 790.283   1
   5  -1   7 24089.4 1029.83   1
  -5  -1   7 22755.7 599.281   3
   5   1   7 24668.4 1042.95   1
  -5   1   8 5538.84 428.154   1
   5  -1   8 5560.30 548.274   1
   5   1   8 5844.14 562.060   1
   5   1   9 21237.5 1099.90   1
  -5   1   9 21246.9 879.406   1
   5  -1   9 21875.7 1108.18   1
  -5   1  10 5213.00 479.488   1
   5  -1  10 4720.41 568.950   1
   5   1  10 4980.91 593.473   1
  -5   1  11 15187.2 858.609   1
   5   1  11 13962.7 1004.30   1
   5  -1  11 15344.1 1044.38   1
  -5   1  12 1947.00 371.126   1
   5   1  12 1933.75 466.129   1
   5  -1  12 1504.35 414.144   1
   5   1  13 5473.27 711.247   1
   5  -1  13 7165.41 816.983   1
   5   1  14 2327.24 539.238   1
   5  -1  14 2724.19 583.873   1
   5   1  15 5080.23 757.961   1
  -5  -3 -11 2500.44 387.412   3
  -5  -3 -10 14939.6 871.634   3
  -5  -3  -9 1213.80 278.458   3
  -5   3  -9 1273.12 196.656   3
  -5  -3  -8 17767.2 884.319   3
  -5   3  -8 18786.2 683.608   3
  -5  -3  -7 1863.83 296.982   3
  -5  -3  -6 17724.8 813.201   3
  -5  -3  -5 3640.42 375.684   3
  -5  -3  -4 52902.3 1286.57   3
  -5  -3  -3 3077.42 322.965   3
   5  -3   0 17858.5 495.335   2
   5  -3   1 13951.4 488.690   2
   5   3   2 40750.6 1033.66   2
   5   3   3 2517.91 299.624   2
   5   3   4 50339.9 1255.68   2
   5  -3   5 4155.44 405.281   1
  -5  -3   6 15282.8 378.321   3
   5  -3   6 16768.4 821.544   1
   5  -3   7 2521.22 385.672   1
  -5   3   8 19728.7 811.616   1
   5   3   8 19242.7 1000.37   1
   5  -3   8 19934.6 1014.70   1
   5  -3   9 933.266 308.378   1
   5   3   9 1081.53 328.470   1
  -5   3   9 1246.06 249.305   1
   5  -3  10 16281.3 1015.23   1
   5   3  10 14912.6 993.135   1
  -5   3  10 16903.2 871.567   1
  -5   3  11 2206.04 365.982   1
   5   3  11 1774.55 404.194   1
  -5   3  12 6948.50 637.208   1
   5   3  12 7135.54 772.563   1
   5   3  13 1534.26 467.081   1
   5   3  14 6776.80 840.384   1
   5   3  15 127.011 306.349   1
  -5  -5 -12 10393.4 836.805   3
  -5  -5 -11 2704.32 447.306   3
  -5  -5 -10 1816.04 363.072   3
  -5  -5  -9 6162.66 608.802   3
  -5  -5  -8 16211.0 931.242   3
  -5  -5  -7 14905.4 861.358   3
  -5  -5  -6 9566.78 667.442   3
  -5  -5  -5 14267.1 773.566   3
  -5  -5  -4 10456.8 644.102   3
  -5  -5  -3 21737.8 872.192   3
  -5  -5  -2 60135.3 1389.69   3
   5  -5  -2 62895.6 605.120   2
  -5  -5  -1 40712.8 1094.51   3
  -5  -5   0 22910.8 788.264   3
  -5   5   0 23754.4 565.173   2
  -5  -5   1 39622.7 977.593   3
  -5  -5   2 63833.2 1166.38   3
  -5  -5   3 20090.6 615.851   3
   5   5   3 19827.1 796.287   2
   5   5   4 8503.45 550.764   2
  -5  -5   4 9675.23 388.411   3
  -5  -5   5 14635.3 416.072   3
   5   5   5 14868.6 731.666   2
  -5  -5   6 9427.52 251.036   3
   5   5  10 2232.66 448.607   1
  -5   5  10 1737.38 331.176   1
   5   5  11 2344.51 481.959   1
  -5   5  11 1504.23 328.524   1
  -5   5  12 9386.05 768.856   1
   5   5  12 8672.86 878.317   1
   5   5  13 4075.87 655.462   1
   5   5  14 3082.26 595.653   1
   5   5  15 1788.20 523.618   1
  -5  -7 -12 135.426 241.358   3
  -5  -7 -11 13992.1 1031.30   3
  -5  -7 -10 740.533 289.986   3
  -5  -7  -9 18458.3 1105.89   3
  -5  -7  -8 257.137 227.662   3
   5  -7  -7 26148.2 1184.38   3
  -5  -7  -7 24781.6 1200.67   3
   5  -7  -6 2011.63 363.647   3
  -5  -7  -6 1612.77 328.619   3
  -5  -7  -5 18129.9 960.714   3
   5  -7  -5 17690.3 417.111   2
   5  -7  -5 18539.5 940.178   3
  -5  -7  -4 2614.55 379.850   3
   5  -7  -4 3063.00 401.532   3
  -5  -7  -3 62146.8 1628.00   3
  -5  -7  -2 5423.69 487.701   3
  -5  -7  -1 47362.4 1313.33   3
  -5  -7   0 4294.15 405.080   3
  -5   7   0 4015.10 242.183   2
  -5  -7   1 50177.1 1236.35   3
  -5  -7   2 7088.43 456.926   3
   5   7   3 52821.0 1344.69   2
  -5  -7   3 60667.6 1215.02   3
  -5  -7   4 1998.66 222.603   3
   5   7   4 2289.45 313.317   2
  -5  -7   5 20533.3 596.225   3
   5   7   5 19619.2 858.194   2
   5   7   6 2480.50 346.583   2
  -5  -7   6 2255.63 167.341   3
   5   7  12 247.923 328.680   1
  -5   7  12 478.563 283.529   1
   5   7  13 8152.23 917.870   1
   5   7  14 507.646 371.317   1
  -5  -9 -13 269.690 320.010   3
  -5  -9 -12 9918.48 963.206   3
  -5  -9 -11 1145.00 385.320   3
  -5  -9 -10 12577.4 1027.53   3
  -5  -9  -9 2483.74 485.246   3
   5  -9  -8 11668.7 900.043   3
  -5  -9  -8 11795.0 928.548   3
   5  -9  -7 6649.15 682.378   3
  -5  -9  -7 6683.09 697.651   3
   5  -9  -6 23162.6 1187.82   3
  -5  -9  -6 23434.9 1223.82   3
   5  -9  -5 12689.8 867.197   3
  -5  -9  -5 13517.2 911.368   3
   5  -9  -4 24718.7 1164.22   3
  -5  -9  -4 24139.1 1167.72   3
  -5  -9  -3 2082.63 371.554   3
   5  -9  -3 2080.25 357.116   3
  -5  -9  -2 31206.8 1242.97   3
  -5  -9  -1 4583.81 475.176   3
  -5  -9   0 39457.5 1288.31   3
  -5   9   0 40010.8 758.498   2
  -5  -9   1 5041.57 459.170   3
  -5  -9   2 32739.1 1086.35   3
   5   9   3 2969.37 405.740   2
  -5  -9   3 2239.25 288.180   3
  -5  -9   4 21135.1 790.439   3
   5   9   4 20798.3 898.065   2
  -5  -9   5 12117.8 549.383   3
   5   9   5 11493.7 678.046   2
   5   9   6 21909.9 962.111   2
  -5  -9   6 22849.7 660.560   3
   5   9  13 627.044 399.072   1
  -5 -11 -13 3902.12 691.242   3
  -5 -11 -12 1249.32 432.423   3
  -5 -11 -11 2699.67 559.058   3
  -5 -11 -10 8432.36 913.957   3
   5 -11  -9 3021.30 557.439   3
  -5 -11  -9 3922.98 629.977   3
   5 -11  -8 5365.98 680.967   3
  -5 -11  -8 6040.57 735.764   3
  -5 -11  -7 12464.9 1004.45   3
   5 -11  -7 12132.1 968.753   3
   5 -11  -6 16161.9 1088.11   3
  -5 -11  -6 15748.1 1090.50   3
   5 -11  -5 3753.19 543.834   3
  -5 -11  -5 3677.50 540.007   3
  -5 -11  -4 31715.9 1450.32   3
   5 -11  -4 31117.8 1423.58   3
   5 -11  -3 9802.94 802.474   3
  -5 -11  -3 10625.0 829.513   3
  -5 -11  -2 16462.3 989.388   3
  -5 -11  -1 5298.50 566.797   3
  -5 -11   0 22888.0 1090.21   3
  -5 -11   1 5407.88 534.852   3
  -5 -11   2 14675.2 822.523   3
  -5 -11   3 9604.35 639.759   3
   5  11   3 9359.03 665.910   2
  -5 -11   4 29093.1 1043.92   3
   5  11   4 27956.2 1079.01   2
  -5 -11   5 3114.18 329.890   3
   5  11   5 3098.91 376.769   2
   5  11   6 14745.0 797.911   2
  -5 -13 -12 240.059 277.653   3
  -5 -13 -11 4307.58 734.224   3
  -5 -13 -10 223.155 319.008   3
  -5 -13  -9 14486.3 1228.65   3
  -5 -13  -8 828.680 347.933   3
   5 -13  -8 1506.99 468.874   3
   5 -13  -7 14051.1 1126.55   3
  -5 -13  -7 13124.8 1107.99   3
  -5 -13  -6-62.6953 288.832   3
   5 -13  -6 361.525 318.002   3
   5 -13  -5 16098.7 1147.92   3
  -5 -13  -5 17306.0 1203.19   3
  -5 -13  -4 33.1146 230.593   3
   5 -13  -4 269.094 249.296   3
  -5 -13  -3 16382.1 1105.18   3
   5 -13  -3 16756.3 1114.37   3
  -5 -13  -2 172.717 248.753   3
  -5 -13  -1 24073.1 1267.52   3
  -5 -13   0 6170.43 638.173   3
  -5 -13   1 21652.4 1123.46   3
  -5 -13   2 334.285 211.208   3
   5  13   3 15433.3 851.303   2
  -5 -13   3 17266.0 950.096   3
   5  13   4-85.9684 197.444   2
  -5 -13   4-86.6598 147.747   3
  -5 -15 -10 7101.74 955.079   3
  -5 -15  -9 4092.26 723.326   3
  -5 -15  -8 5489.86 815.732   3
  -5 -15  -7 2116.37 533.181   3
  -5 -15  -6 7548.91 898.333   3
  -5 -15  -5 1142.40 378.690   3
  -5 -15  -4 10366.0 982.920   3
  -5 -15  -3 5781.34 738.121   3
  -5 -15  -2 5217.19 681.601   3
  -5 -15  -1 4397.69 614.573   3
  -5 -15   0 11112.7 918.834   3
  -5 -15   1 3380.57 526.008   3
  -5 -15   2 6900.72 696.685   3
  -5 -15   3 7234.65 688.471   3
  -5 -15   4 11646.6 826.989   3
  -5 -17  -8 4513.76 801.440   3
  -5 -17  -7 83.7645 290.723   3
  -5 -17  -6 6723.34 895.040   3
  -5 -17  -5 3390.44 663.278   3
  -5 -17  -4 8022.77 932.895   3
  -5 -17  -3 307.029 325.054   3
  -5 -17  -2 7213.26 847.913   3
  -5 -17  -1 3935.99 635.305   3
  -5 -17   0 8419.41 881.954   3
  -5 -17   1 3421.88 562.803   3
  -5 -17   2 7634.80 792.166   3
  -5 -17   3 486.387 243.516   3
  -5 -19  -5 6909.85 961.472   3
  -5 -19  -4 427.785 378.960   3
  -5 -19  -3 4799.06 795.797   3
  -5 -19  -2 421.562 337.565   3
  -5 -19  -1 8178.14 949.719   3
  -5 -19   0 34.0614 270.598   3
  -5 -19   1 9239.29 967.850   3
  -5 -19   2 73.2910 246.703   3
  -5 -21   0 911.007 405.956   3
  -5 -21   1 2548.06 608.229   3
  -6   0 -10 24273.5 992.597   3
  -6   0  -9 21.9582 138.928   3
  -6   0  -8 19634.3 847.211   3
  -6   0  -7-33.5916 128.590   3
   6   0   0 157977. 1205.18   1
   6   0   1 133.698 108.469   1
   6   0   1 899.269 246.995   2
   6   0   2 43938.6 1073.20   2
   6   0   2 44529.0 919.900   1
   6   0   3 165.961 159.320   1
   6   0   3 7.95879 147.112   2
   6   0   4 58752.1 1303.45   1
   6   0   4 59248.9 1403.20   2
   6   0   5 121.764 173.436   1
  -6   0   5 64.5692 83.4839   1
  -6   0   6 47733.8 930.908   1
   6   0   6 46752.2 1368.05   1
   6   0   7 55.1386 196.112   1
  -6   0   7 76.8925 108.682   1
   6   0   8 22933.0 1099.00   1
  -6   0   8 24204.3 829.407   1
   6   0   9 2.42752 211.156   1
  -6   0   9 94.7205 143.157   1
  -6   0  10 23438.7 959.746   1
   6   0  10 22057.5 1200.71   1
   6   0  11-131.116 252.046   1
   6   0  12 8322.39 839.024   1
   6   0  13 94.2027 252.497   1
   6   0  14 5928.94 793.274   1
   6   0  15 346.406 350.345   1
  -6  -2 -11 6150.02 575.062   3
  -6  -2 -10 6332.19 568.402   3
  -6  -2  -9 22932.0 1022.60   3
  -6   2  -9 22517.6 858.582   3
  -6  -2  -8 3184.88 391.130   3
  -6   2  -8 2922.15 310.768   3
  -6  -2  -7 20481.5 899.859   3
  -6  -2  -6 15822.8 770.206   3
  -6  -2  -5 57857.1 1403.91   3
   6   2  -4 17528.3 470.969   1
   6  -2   0 33595.1 791.067   2
  -6   2   0 33192.0 629.540   1
   6  -2   1 57878.6 1107.89   2
   6  -2   2 18903.9 619.667   1
   6   2   2 18489.4 733.601   2
   6  -2   2 19106.4 678.136   2
   6  -2   3 38818.8 989.010   1
   6   2   3 38304.5 1100.49   2
   6  -2   4 16359.0 711.996   1
   6   2   4 16198.7 749.662   2
   6   2   5 57682.0 1478.41   2
   6  -2   5 56983.3 1415.73   1
  -6  -2   6 17166.9 523.078   3
   6  -2   6 17522.7 858.897   1
   6   2   6 17347.0 847.071   1
  -6   2   6 17502.0 597.709   1
   6   2   7 20533.2 984.827   1
  -6  -2   7 18268.1 520.485   3
  -6   2   7 19719.8 706.071   1
   6  -2   7 19301.9 948.282   1
   6   2   8 2825.02 426.884   1
  -6   2   8 2773.45 305.023   1
   6  -2   8 2950.03 424.626   1
   6   2   9 23436.5 1183.99   1
  -6   2   9 23451.6 912.432   1
   6  -2   9 24824.6 1212.98   1
   6   2  10 5956.47 648.161   1
  -6   2  10 6090.47 510.257   1
   6  -2  10 6504.47 685.558   1
  -6   2  11 5887.95 537.493   1
   6   2  11 5759.08 679.677   1
   6  -2  11 5937.30 688.545   1
   6  -2  12 3998.94 606.528   1
   6   2  12 3961.45 611.688   1
   6  -2  13 3816.45 628.842   1
   6   2  13 3344.52 601.151   1
   6   2  14 1407.10 495.195   1
   6   2  15 3873.49 684.600   1
  -6  -4 -11 9940.94 790.073   3
  -6  -4 -10 1093.76 285.052   3
  -6   4  -9 14684.3 644.421   3
  -6  -4  -9 13858.1 867.577   3
  -6  -4  -8 5881.49 565.882   3
  -6  -4  -7 31080.4 1199.24   3
  -6  -4  -6 7910.25 597.006   3
  -6  -4  -5 15239.6 789.209   3
  -6  -4  -4 18332.7 833.620   3
  -6  -4  -3 70978.5 1561.67   3
  -6  -4  -2 13366.9 660.912   3
   6  -4  -1 50494.1 831.407   2
   6  -4   0 1962.94 193.524   2
   6   4   2 12280.9 635.544   2
   6   4   3 72002.6 1548.00   2
   6   4   4 18224.5 814.846   2
   6   4   5 16820.8 811.917   2
  -6  -4   7 27483.8 439.202   3
   6   4   9 12833.9 900.713   1
  -6   4   9 13441.0 727.954   1
   6   4  10 1666.81 414.742   1
  -6   4  10 1117.70 262.024   1
  -6   4  11 7647.18 626.961   1
   6   4  11 8854.70 837.983   1
   6   4  12 257.714 310.930   1
   6   4  13 11680.1 1038.81   1
   6   4  14 2502.83 581.378   1
  -6  -6 -12 13162.7 1001.31   3
  -6  -6 -11 977.856 344.206   3
  -6  -6 -10 10989.7 870.158   3
  -6  -6  -9 407.475 256.374   3
  -6  -6  -8 15104.4 957.994   3
  -6  -6  -7 5736.48 587.620   3
  -6  -6  -6 16038.6 918.639   3
  -6  -6  -5 824.519 263.302   3
  -6  -6  -4 22681.6 1003.48   3
  -6  -6  -3 6747.60 542.121   3
   6  -6  -3 6264.23 203.044   2
  -6  -6  -2 57970.0 1472.46   3
  -6  -6  -1 2675.63 330.302   3
  -6  -6   0 65184.3 1444.60   3
  -6   6   0 66049.2 1010.99   2
  -6  -6   1 3026.88 317.688   3
  -6  -6   2 61723.3 1275.36   3
  -6  -6   3 6565.82 404.614   3
   6   6   3 6658.76 534.877   2
  -6  -6   4 22980.3 693.749   3
   6   6   4 21840.6 929.314   2
  -6  -6   5 1204.75 159.043   3
   6   6   5 1218.80 269.711   2
   6   6   6 16844.2 867.056   2
  -6  -6   6 16967.4 462.726   3
  -6   6  11 1094.70 297.418   1
   6   6  11 1168.76 388.562   1
   6   6  12 13192.1 1088.06   1
   6   6  13 1341.59 452.130   1
   6   6  14 4000.71 710.668   1
  -6  -8 -12 4546.76 659.210   3
  -6  -8 -11 6831.24 764.984   3
  -6  -8 -10 5070.50 657.084   3
  -6  -8  -9 4648.83 616.384   3
  -6  -8  -8 12639.2 948.100   3
  -6  -8  -7 10605.3 854.694   3
  -6  -8  -6 11055.7 833.211   3
  -6  -8  -5 9140.14 735.737   3
  -6  -8  -4 15984.1 925.945   3
  -6  -8  -3 17782.6 948.920   3
  -6  -8  -2 22045.3 1018.73   3
  -6  -8  -1 20441.3 937.478   3
  -6  -8   0 13472.8 744.958   3
  -6   8   0 13645.9 466.808   2
  -6  -8   1 22204.3 905.369   3
  -6  -8   2 20582.7 835.887   3
   6   8   3 15180.6 802.385   2
  -6  -8   3 16831.9 717.325   3
   6   8   4 12162.9 724.634   2
  -6  -8   4 13552.6 614.720   3
  -6  -8   5 8972.41 463.238   3
   6   8   5 8171.59 603.724   2
  -6  -8   6 11654.5 456.026   3
   6   8   6 11380.7 731.196   2
   6   8  12 3453.47 621.712   1
   6   8  13 2172.30 526.711   1
  -6 -10 -13 3070.01 605.268   3
  -6 -10 -12 1206.07 411.767   3
  -6 -10 -11 12550.1 1102.14   3
  -6 -10 -10 257.733 237.879   3
  -6 -10  -9 10874.0 974.337   3
  -6 -10  -8 1035.66 344.519   3
  -6 -10  -7 14038.6 1045.61   3
  -6 -10  -6 859.834 313.598   3
  -6 -10  -5 31145.5 1443.82   3
  -6 -10  -4 408.988 247.683   3
  -6 -10  -3 15136.2 955.290   3
  -6 -10  -2 1627.51 335.427   3
  -6 -10  -1 20454.4 1037.36   3
  -6 -10   0 2234.81 362.398   3
  -6  10   0 1972.82 194.112   2
  -6 -10   1 22283.1 1009.66   3
  -6 -10   2 2365.49 332.420   3
  -6 -10   3 14610.7 756.950   3
   6  10   3 12788.5 783.483   2
  -6 -10   4 666.895 196.393   3
   6  10   4 644.773 265.801   2
   6  10   5 28534.8 1137.23   2
  -6 -10   5 30894.5 972.294   3
   6  10   6 852.845 245.834   2
   6  10  13 3477.49 670.493   1
  -6 -12 -13 339.553 311.139   3
  -6 -12 -12 4390.99 743.190   3
  -6 -12 -11 692.958 368.173   3
  -6 -12 -10 4792.15 739.996   3
  -6 -12  -9 2439.74 551.173   3
  -6 -12  -8 12008.1 1070.28   3
  -6 -12  -7 932.763 351.238   3
  -6 -12  -6 9944.38 921.796   3
  -6 -12  -5 10344.7 907.094   3
  -6 -12  -4 10344.4 888.893   3
  -6 -12  -3 3154.49 496.900   3
  -6 -12  -2 17755.8 1082.80   3
  -6 -12  -1 4369.01 539.667   3
  -6 -12   0 11607.2 837.470   3
  -6 -12   1 5621.25 565.337   3
  -6 -12   2 15780.8 912.061   3
   6  12   3 3386.61 450.374   2
  -6 -12   3 2994.10 397.198   3
  -6 -12   4 12906.5 755.764   3
   6  12   4 11286.8 745.160   2
  -6 -12   5 9795.91 621.807   3
   6  12   5 9764.22 694.440   2
   6  12   6 8499.57 652.635   2
  -6 -14 -11 928.091 440.675   3
  -6 -14 -10 3619.22 698.618   3
  -6 -14  -9 3096.69 645.308   3
  -6 -14  -8 8032.29 954.890   3
  -6 -14  -7 1624.40 477.430   3
  -6 -14  -6 5944.72 786.906   3
  -6 -14  -5 2811.06 552.986   3
  -6 -14  -4 13633.7 1093.36   3
  -6 -14  -3 4245.01 630.492   3
  -6 -14  -2 15465.6 1102.72   3
  -6 -14  -1 2356.53 466.136   3
  -6 -14   0 16656.0 1081.73   3
  -6 -14   1 1968.01 398.588   3
  -6 -14   2 14751.6 965.914   3
   6  14   3 4079.58 521.980   2
  -6 -14   3 4314.83 516.146   3
  -6 -14   4 14209.1 875.411   3
  -6 -16  -9 4821.01 817.320   3
  -6 -16  -8 689.411 401.375   3
  -6 -16  -7 4820.42 787.115   3
  -6 -16  -6-43.4167 278.412   3
  -6 -16  -5 12867.6 1170.74   3
  -6 -16  -4 122.482 265.482   3
  -6 -16  -3 9076.52 943.350   3
  -6 -16  -2 1950.96 467.671   3
  -6 -16  -1 15511.5 1162.98   3
  -6 -16   0 164.568 269.946   3
  -6 -16   1 15179.8 1091.92   3
  -6 -16   2 2002.76 434.486   3
  -6 -16   3 9797.03 825.900   3
  -6 -18  -6 2982.82 670.230   3
  -6 -18  -5 3491.16 692.621   3
  -6 -18  -4 5122.26 807.613   3
  -6 -18  -3 3948.97 701.170   3
  -6 -18  -2 3540.65 659.489   3
  -6 -18  -1 2506.28 539.247   3
  -6 -18   0 8653.67 917.542   3
  -6 -18   1 3539.26 605.537   3
  -6 -18   2 3457.35 587.329   3
  -6 -20  -2 5519.69 818.802   3
  -6 -20  -1 1206.25 445.774   3
  -6 -20   0 6948.94 902.973   3
  -6 -20   1 633.836 385.702   3
  -7  -1 -11 13136.7 813.934   3
  -7  -1 -10 1204.38 270.182   3
  -7   1 -10 1075.25 243.339   3
  -7  -1  -9 16210.4 854.961   3
  -7   1  -9 17000.7 816.609   3
  -7  -1  -8 6494.32 538.921   3
  -7   1  -8 5998.22 486.684   3
  -7  -1  -7 11329.6 684.607   3
  -7   1   0 15648.1 425.656   1
   7  -1   1 55093.6 940.697   1
  -7   1   1 56759.3 605.071   1
   7  -1   1 55598.7 1210.22   2
   7  -1   2 15202.9 671.731   2
   7  -1   2 15251.1 567.836   1
   7   1   2 14799.2 694.170   2
   7  -1   3 34719.5 948.314   1
   7  -1   3 33910.1 1033.35   2
   7   1   3 33884.1 937.991   1
   7   1   3 34446.9 1077.84   2
  -7   1   4 16226.2 334.318   1
   7  -1   4 15844.0 709.422   1
   7   1   4 16507.2 785.750   2
   7   1   4 17348.4 737.804   1
  -7   1   5 53429.9 783.831   1
   7  -1   5 54041.9 1399.41   1
   7   1   5 52810.6 1393.76   1
  -7   1   6 14284.5 488.144   1
   7  -1   6 13577.2 766.209   1
   7   1   6 14139.1 774.656   1
   7   1   7 13910.7 834.083   1
   7  -1   7 12985.1 803.557   1
  -7   1   7 12561.8 517.937   1
   7   1   8 6788.40 629.196   1
   7  -1   8 6359.07 600.550   1
  -7   1   8 7296.90 447.560   1
   7   1   9 16783.5 1014.68   1
   7  -1   9 16743.0 1008.73   1
  -7   1   9 17294.9 745.293   1
   7   1  10 1346.23 376.322   1
   7  -1  10 1107.19 346.103   1
  -7   1  10 1538.19 270.651   1
   7   1  11 11604.6 951.736   1
   7  -1  11 13172.9 1001.81   1
   7   1  12 491.029 322.637   1
   7  -1  12 491.259 353.823   1
   7  -1  13 2332.81 539.175   1
   7   1  13 2207.14 505.831   1
   7   1  14 1146.83 436.348   1
   7  -1  14 1362.02 451.053   1
   7   1  15 3762.97 692.565   1
  -7  -3 -11 2628.16 420.727   3
  -7  -3 -10 11560.5 809.131   3
  -7  -3  -9 2490.25 388.647   3
  -7   3  -9 2442.68 299.941   3
  -7  -3  -8 25579.3 1121.21   3
  -7  -3  -7 743.682 228.712   3
  -7  -3  -6 27811.8 1090.66   3
  -7  -3  -5 709.701 228.826   3
   7   3  -4 28125.1 635.535   1
   7  -3   0 74994.4 1244.63   2
   7  -3   1 3653.85 306.371   2
   7   3   2 42564.0 1203.22   2
   7  -3   2 45537.3 1099.26   2
   7   3   3 2771.76 354.308   2
   7   3   4 31411.9 1103.82   2
   7   3   5 673.965 204.052   2
   7  -3   5 1145.42 270.881   1
   7  -3   6 25096.9 1047.25   1
   7  -3   7 702.010 248.581   1
  -7   3   7 746.327 163.987   1
   7   3   7 971.049 278.441   1
   7  -3   8 22832.7 1127.45   1
   7   3   8 22711.4 1128.84   1
  -7   3   8 23919.9 839.804   1
  -7   3   9 2430.73 307.512   1
   7   3   9 2046.99 398.398   1
   7  -3   9 2208.27 421.976   1
  -7   3  10 11029.5 668.726   1
   7  -3  10 9753.46 834.267   1
   7   3  10 10712.7 876.060   1
   7   3  11 2750.03 515.972   1
   7   3  12 7598.23 829.643   1
   7   3  13 211.001 281.393   1
   7   3  14 11353.7 1084.60   1
  -7  -5 -12 4885.40 616.657   3
  -7  -5 -11 10219.2 855.396   3
  -7  -5 -10 1277.88 337.308   3
  -7  -5  -9 10080.1 802.030   3
  -7  -5  -8 11776.7 833.841   3
  -7  -5  -7 12557.4 827.097   3
  -7  -5  -6 6691.77 593.136   3
  -7  -5  -5 16918.7 888.206   3
  -7  -5  -4 14258.7 797.677   3
  -7  -5  -3 29814.5 1099.45   3
   7  -5  -2 30148.8 643.257   2
  -7  -5  -2 29374.1 1060.56   3
  -7  -5  -1 20448.0 848.396   3
   7  -5  -1 21179.5 560.325   2
   7  -5   0 216.637 103.598   2
   7   5   3 28096.5 1066.20   2
   7   5   4 12970.9 748.810   2
   7   5   5 15548.2 825.492   2
  -7  -5   6 6867.16 334.871   3
   7   5   6 6051.03 538.780   2
  -7  -5   7 10191.7 331.325   3
  -7   5   9 11042.2 660.130   1
  -7   5  10 2322.30 355.291   1
   7   5  10 2001.28 423.080   1
   7   5  11 10121.0 924.916   1
   7   5  12 6039.18 772.565   1
   7   5  13 8525.43 940.601   1
   7   5  14 3818.83 697.717   1
  -7  -7 -12 430.748 299.395   3
  -7  -7 -11 10933.9 940.726   3
  -7  -7 -10 3816.45 578.569   3
  -7  -7  -9 11952.2 931.815   3
  -7  -7  -8 1528.85 361.037   3
  -7  -7  -7 24654.0 1240.46   3
  -7  -7  -6 4271.73 522.794   3
  -7  -7  -5 9791.49 740.871   3
   7  -7  -4 2161.33 126.196   2
  -7  -7  -4 1729.45 340.339   3
  -7  -7  -3 29532.2 1176.67   3
  -7  -7  -2 992.740 262.521   3
  -7  -7  -1 20972.2 922.801   3
  -7  -7   0 5467.58 468.389   3
  -7  -7   1 22375.8 895.240   3
  -7  -7   2 1359.98 231.779   3
   7   7   3 26617.9 1069.12   2
  -7  -7   3 27609.2 903.826   3
   7   7   4 1094.30 287.654   2
  -7  -7   4 1294.73 201.859   3
  -7  -7   5 10627.9 495.291   3
   7   7   5 8643.46 651.518   2
  -7  -7   6 5241.10 314.067   3
   7   7   6 5015.76 511.137   2
   7   7  11 9778.63 925.560   1
   7   7  12 818.355 400.936   1
   7   7  13 5787.39 793.527   1
   7   7  14 481.564 343.753   1
  -7  -9 -13 45.4880 246.507   3
  -7  -9 -12 7746.65 885.264   3
  -7  -9 -11 745.583 338.789   3
  -7  -9 -10 7947.14 854.791   3
  -7  -9  -9 4675.43 653.364   3
  -7  -9  -8 8375.59 818.051   3
  -7  -9  -7 2141.21 436.969   3
  -7  -9  -6 22334.6 1233.97   3
  -7  -9  -5 1216.09 322.440   3
  -7  -9  -4 11819.9 857.169   3
  -7  -9  -3 841.599 278.553   3
  -7  -9  -2 14340.5 874.533   3
  -7  -9  -1 4866.67 514.201   3
  -7   9   0 26071.2 680.054   2
  -7  -9   0 26914.3 1115.21   3
  -7  -9   1 3474.96 411.081   3
  -7  -9   2 15538.7 788.698   3
  -7  -9   3 315.481 160.903   3
   7   9   3 1219.14 389.111   2
  -7  -9   4 10724.7 598.250   3
   7   9   4 10303.9 729.926   2
   7   9   5 1708.08 321.586   2
  -7  -9   5 2230.79 273.524   3
   7   9   6 22317.6 1066.34   2
   7   9  12 7361.61 876.508   1
   7   9  13 220.721 361.264   1
  -7 -11 -13 2311.76 566.863   3
  -7 -11 -12 3148.92 646.716   3
  -7 -11 -11 2001.29 500.215   3
  -7 -11 -10 6469.58 821.332   3
  -7 -11  -9 2655.61 531.575   3
  -7 -11  -8 3461.18 593.298   3
  -7 -11  -7 6241.98 737.313   3
  -7 -11  -6 12828.0 1024.91   3
  -7 -11  -5 2562.30 473.600   3
  -7 -11  -4 16943.6 1103.08   3
  -7 -11  -3 14761.6 1001.07   3
  -7 -11  -2 5615.28 620.641   3
  -7 -11  -1 1655.72 357.300   3
  -7 -11   0 12266.6 827.599   3
  -7 -11   1 2453.34 395.018   3
  -7 -11   2 7454.25 613.039   3
   7  11   3 12875.8 828.606   2
  -7 -11   3 15349.8 838.476   3
  -7 -11   4 15920.6 810.975   3
   7  11   4 15210.1 897.449   2
  -7 -11   5 2387.35 315.182   3
   7  11   5 2079.56 364.288   2
   7  11   6 11707.0 793.418   2
   7  11   7 5175.77 556.069   2
  -7 -13 -11 5611.14 854.431   3
  -7 -13 -10 179.453 325.710   3
  -7 -13  -9 11656.5 1135.64   3
  -7 -13  -8 591.317 362.619   3
  -7 -13  -7 9079.36 951.820   3
  -7 -13  -6 280.538 280.064   3
  -7 -13  -5 12679.8 1054.61   3
  -7 -13  -4 1568.83 413.445   3
  -7 -13  -3 11064.0 935.765   3
  -7 -13  -2 338.954 250.562   3
  -7 -13  -1 18641.2 1136.10   3
  -7 -13   0 24.1813 214.847   3
  -7 -13   1 15203.8 981.474   3
  -7 -13   2 828.154 273.355   3
   7  13   3 10143.0 768.687   2
  -7 -13   3 11431.4 793.781   3
   7  13   4 1962.86 392.937   2
  -7 -13   4 1704.74 316.392   3
   7  13   5 10590.5 784.001   2
  -7 -15  -9 3530.14 711.358   3
  -7 -15  -8 4666.44 749.510   3
  -7 -15  -7 2882.09 633.910   3
  -7 -15  -6 5898.11 818.518   3
  -7 -15  -5 694.819 361.528   3
  -7 -15  -4 8758.91 924.634   3
  -7 -15  -3 5532.20 731.933   3
  -7 -15  -2 6556.19 774.649   3
  -7 -15  -1 5323.07 682.214   3
  -7 -15   0 9900.50 887.980   3
  -7 -15   1 4574.54 608.626   3
  -7 -15   2 4975.99 609.553   3
  -7 -15   3 6184.47 642.932   3
  -7 -17  -7 241.468 282.047   3
  -7 -17  -6 6159.47 885.222   3
  -7 -17  -5 5371.17 824.335   3
  -7 -17  -4 7244.86 908.285   3
  -7 -17  -3 414.932 307.400   3
  -7 -17  -2 8323.65 929.061   3
  -7 -17  -1 1757.54 461.567   3
  -7 -17   0 11430.4 1025.83   3
  -7 -17   1 2174.06 483.982   3
  -7 -17   2 7833.31 809.095   3
  -7 -17   3 862.107 330.781   3
  -7 -19  -4 1755.56 518.560   3
  -7 -19  -3 5570.79 844.066   3
  -7 -19  -2 638.147 403.572   3
  -7 -19  -1 7947.56 949.080   3
  -7 -19   0-266.248 296.549   3
  -7 -19   1 9802.59 993.836   3
  -7 -19   2 830.292 361.289   3
  -7 -21   0 636.826 396.700   3
  -8   0 -10 24405.5 1078.00   3
  -8   0  -9 62.3943 180.668   3
  -8   0  -8 4934.64 482.106   3
   8   0  -1 109.906 57.2257   1
   8   0   0 49414.8 774.036   1
   8   0   1 815.425 263.871   2
   8   0   1 76.1884 105.745   1
   8   0   2 11617.8 518.195   1
   8   0   2 11982.2 644.025   2
   8   0   3-247.848 231.210   2
   8   0   3-66.0100 133.096   1
   8   0   4 39673.7 1139.70   1
   8   0   4 39596.8 1241.91   2
   8   0   5-18.6601 169.041   1
   8   0   6 10879.6 700.356   1
   8   0   7 53.8373 194.178   1
   8   0   8 8463.39 707.456   1
   8   0   9-41.9167 258.090   1
   8   0  10 24246.2 1301.03   1
   8   0  11 37.0291 257.020   1
   8   0  12 3011.58 564.073   1
   8   0  13 385.977 346.396   1
   8   0  14 3290.76 650.054   1
  -8  -2 -11 1962.10 367.624   3
  -8  -2 -10 3046.14 435.676   3
  -8   2 -10 2450.77 342.416   3
  -8  -2  -9 7900.37 648.654   3
  -8   2  -9 7263.92 556.800   3
  -8  -2  -8 1788.79 341.135   3
  -8  -2  -7 14973.8 841.206   3
  -8  -2  -6 7122.45 571.272   3
   8   2  -5 19922.2 494.921   1
   8   2  -4 8337.07 274.971   1
  -8   2   0 54459.4 886.865   1
   8  -2   0 53984.9 1178.79   2
  -8   2   1 19273.9 441.045   1
   8  -2   1 19517.6 748.758   2
   8   2   2 18307.3 827.400   2
   8  -2   2 17796.4 646.659   1
   8  -2   2 18079.1 752.400   2
  -8   2   2 16822.0 334.717   1
   8  -2   3 13385.2 683.451   2
   8  -2   3 13517.8 627.407   1
   8   2   3 12610.8 713.658   2
   8  -2   4 5390.38 444.735   1
   8   2   4 4788.88 469.029   2
   8  -2   5 21224.6 912.718   1
   8   2   5 20074.5 953.684   2
   8   2   5 20794.1 905.207   1
  -8   2   5 20741.7 481.509   1
  -8   2   6 7056.86 337.377   1
   8  -2   6 8343.05 628.691   1
   8   2   6 6832.59 571.803   1
  -8   2   7 13128.1 521.332   1
   8  -2   7 13700.7 834.136   1
   8   2   7 14072.3 859.517   1
  -8   2   8 1720.24 227.469   1
   8   2   8 1601.97 356.960   1
   8  -2   8 1717.54 378.530   1
  -8   2   9 9515.00 540.207   1
   8   2   9 8892.35 770.891   1
   8  -2   9 10072.6 811.723   1
   8  -2  10 2520.99 478.184   1
   8   2  10 2602.91 480.802   1
   8   2  11 1474.25 409.009   1
   8  -2  11 2475.40 479.043   1
   8   2  12 3532.22 596.440   1
   8  -2  12 3466.51 598.926   1
   8  -2  13 8544.31 907.974   1
   8   2  13 7433.44 871.902   1
   8   2  14 434.316 322.998   1
  -8  -4 -12 827.583 303.620   3
  -8  -4 -11 4077.79 548.121   3
  -8  -4 -10 2158.24 407.584   3
  -8  -4  -9 12070.9 860.824   3
  -8  -4  -8 2872.39 423.901   3
  -8  -4  -7 17291.7 958.048   3
  -8  -4  -6 1050.34 272.003   3
  -8  -4  -5 16526.2 884.493   3
  -8  -4  -4 4219.03 445.755   3
   8  -4  -1 14624.4 562.404   2
   8  -4   0 64.8742 133.138   2
   8  -4   1 15170.6 628.151   2
   8   4   2 2694.95 423.969   2
   8   4   3 45861.8 1381.31   2
   8   4   4 5569.20 517.905   2
   8   4   5 17738.5 919.123   2
   8   4   6 326.787 223.239   2
   8   4   8 2954.56 456.135   1
  -8   4   8 3365.05 326.007   1
   8   4   9 10034.8 834.286   1
  -8   4   9 10048.4 592.574   1
   8   4  10 2529.30 476.422   1
   8   4  11 6271.36 731.269   1
   8   4  12 874.156 370.711   1
   8   4  13 5340.09 770.308   1
   8   4  14 1702.92 538.460   1
  -8  -6 -12 12723.1 1022.84   3
  -8  -6 -11 166.640 223.795   3
  -8  -6 -10 7812.04 773.495   3
  -8  -6  -9 61.8946 219.543   3
  -8  -6  -8 13913.9 966.318   3
  -8  -6  -7 6724.80 653.154   3
  -8  -6  -6 11476.7 811.143   3
  -8  -6  -5 1449.36 312.891   3
  -8  -6  -4 15671.6 886.750   3
   8  -6  -3 6654.05 314.743   2
  -8  -6  -3 6798.95 583.323   3
  -8  -6  -2 32182.3 1193.85   3
   8  -6  -2 33970.7 696.327   2
   8  -6  -1 862.107 134.561   2
  -8  -6  -1 1059.09 254.216   3
  -8  -6   0 15484.0 777.135   3
  -8  -6   1 1245.25 251.670   3
  -8  -6   2 32028.6 1032.70   3
   8   6   3 6242.48 567.537   2
  -8  -6   3 5839.84 434.910   3
  -8  -6   4 16677.1 686.449   3
   8   6   4 14917.4 850.835   2
   8   6   5 1040.08 278.762   2
  -8  -6   5 1464.24 206.813   3
  -8  -6   6 13033.8 520.482   3
   8   6   6 12184.1 793.670   2
   8   6  10 9760.68 886.979   1
   8   6  11 290.882 299.770   1
   8   6  12 11092.1 1039.44   1
   8   6  13 1207.98 450.575   1
   8   6  14 4724.63 789.697   1
  -8  -8 -13 1291.46 411.331   3
  -8  -8 -12 4390.73 673.640   3
  -8  -8 -11 6533.27 773.618   3
  -8  -8 -10 7457.96 813.600   3
  -8  -8  -9 6258.18 715.406   3
  -8  -8  -8 10309.1 892.614   3
  -8  -8  -7 12435.5 942.985   3
  -8  -8  -6 5213.17 611.757   3
  -8  -8  -5 7686.87 704.084   3
  -8  -8  -4 10374.3 778.920   3
  -8  -8  -3 4547.38 521.733   3
  -8  -8  -2 22456.3 1069.45   3
  -8  -8  -1 16871.8 900.681   3
  -8  -8   0 12249.2 743.437   3
  -8  -8   1 18280.7 869.542   3
  -8  -8   2 22085.9 916.036   3
   8   8   3 4460.54 540.486   2
  -8  -8   3 3348.54 368.449   3
  -8  -8   4 9742.68 562.799   3
   8   8   4 7977.07 674.037   2
  -8  -8   5 8800.58 514.130   3
   8   8   5 7829.44 653.985   2
  -8  -8   6 6890.45 413.969   3
   8   8   6 6594.61 615.452   2
   8   8   7 14579.0 920.011   2
   8   8  12 4062.59 680.553   1
   8   8  13 1564.64 489.791   1
  -8 -10 -13 4137.06 692.786   3
  -8 -10 -12 570.082 328.518   3
  -8 -10 -11 10125.1 1027.02   3
  -8 -10 -10 422.058 286.947   3
  -8 -10  -9 8762.75 904.870   3
  -8 -10  -8 995.807 367.918   3
  -8 -10  -7 14201.8 1075.95   3
  -8 -10  -6 453.114 315.177   3
  -8 -10  -5 24601.3 1322.94   3
  -8 -10  -4 1299.31 348.157   3
  -8 -10  -3 10938.1 850.884   3
  -8 -10  -2 4550.16 545.431   3
  -8 -10  -1 16765.7 971.452   3
  -8 -10   0 4252.65 495.813   3
  -8 -10   1 17808.0 945.302   3
  -8 -10   2 4956.55 493.506   3
  -8 -10   3 12362.7 733.877   3
   8  10   3 10686.7 786.261   2
  -8 -10   4 1004.89 238.679   3
   8  10   4 1384.89 353.281   2
   8  10   5 22087.4 1104.47   2
  -8 -10   5 25192.8 942.117   3
   8  10   6 19.1153 190.656   2
   8  10   7 13194.1 897.600   2
  -8 -12 -12 3737.87 712.298   3
  -8 -12 -11 1630.60 511.676   3
  -8 -12 -10 5045.79 778.403   3
  -8 -12  -9 1653.13 463.486   3
  -8 -12  -8 7729.25 893.286   3
  -8 -12  -7 904.687 394.780   3
  -8 -12  -6 9504.48 916.609   3
  -8 -12  -5 5870.25 722.602   3
  -8 -12  -4 12895.9 1021.28   3
  -8 -12  -3 3332.37 525.991   3
  -8 -12  -2 15364.4 1038.89   3
  -8 -12  -1 981.917 309.162   3
  -8 -12   0 11699.9 867.505   3
  -8 -12   1 1788.20 363.798   3
  -8 -12   2 14572.7 900.163   3
   8  12   3 3705.63 545.875   2
  -8 -12   3 4422.94 498.278   3
  -8 -12   4 14797.9 836.744   3
   8  12   4 11713.8 852.883   2
   8  12   5 5264.26 579.076   2
   8  12   6 8005.22 701.009   2
   8  12   7 698.104 259.935   2
  -8 -14 -10 4486.04 786.533   3
  -8 -14  -9 3223.77 684.943   3
  -8 -14  -8 7143.28 907.351   3
  -8 -14  -7 2646.54 572.643   3
  -8 -14  -6 3625.11 637.814   3
  -8 -14  -5 1743.26 460.517   3
  -8 -14  -4 7816.84 868.802   3
  -8 -14  -3 5093.46 677.331   3
  -8 -14  -2 10557.0 940.116   3
  -8 -14  -1 8493.33 822.862   3
  -8 -14   0 10943.6 907.623   3
  -8 -14   1 7778.35 755.533   3
  -8 -14   2 8868.50 771.421   3
   8  14   3 4216.06 559.083   2
  -8 -14   3 4867.48 570.435   3
   8  14   4 8346.29 746.385   2
  -8 -14   4 8516.65 706.864   3
  -8 -16  -8 584.592 420.374   3
  -8 -16  -7 4080.81 728.872   3
  -8 -16  -6-148.084 304.320   3
  -8 -16  -5 11349.7 1130.07   3
  -8 -16  -4 658.799 362.254   3
  -8 -16  -3 6999.69 859.408   3
  -8 -16  -2 994.886 393.163   3
  -8 -16  -1 12579.6 1072.14   3
  -8 -16   0-58.3490 261.537   3
  -8 -16   1 10760.7 942.090   3
  -8 -16   2 1084.18 337.692   3
  -8 -16   3 7365.94 748.417   3
  -8 -18  -5 2288.16 595.341   3
  -8 -18  -4 5330.15 835.694   3
  -8 -18  -3 3552.98 672.170   3
  -8 -18  -2 3060.11 627.291   3
  -8 -18  -1 2465.66 553.577   3
  -8 -18   0 6605.96 830.824   3
  -8 -18   1 3287.01 592.708   3
  -8 -18   2 3301.38 566.702   3
  -8 -20  -1 861.155 415.018   3
  -8 -20   0 4361.05 735.968   3
  -8 -20   1 756.270 371.694   3
  -9  -1 -11 11184.1 808.768   3
  -9  -1 -10 5630.78 570.213   3
  -9   1 -10 5551.82 534.975   3
  -9  -1  -9 12533.2 817.580   3
  -9   1  -9 12182.9 771.787   3
  -9  -1  -8 5052.52 520.267   3
   9   1  -1 32698.6 553.683   1
   9   1   0 19906.5 538.342   1
   9  -1   1 32430.7 793.688   1
   9   1   1 30878.0 1073.43   2
   9   1   1 33171.3 801.595   1
   9  -1   1 32414.7 1054.79   2
   9  -1   2 1628.02 284.642   2
   9  -1   2 1564.50 226.166   1
   9   1   2 1721.65 336.022   2
   9   1   2 1772.89 236.189   1
   9  -1   3 16412.1 699.702   1
   9  -1   3 15680.0 793.601   2
   9   1   3 15286.1 678.538   1
   9   1   3 14910.2 799.668   2
   9  -1   4 3555.28 374.053   1
   9  -1   4 3531.95 410.248   2
   9   1   4 3334.73 416.878   2
   9   1   4 3504.06 371.587   1
   9  -1   5 26500.5 1029.16   1
   9   1   5 24868.7 1087.55   2
   9   1   5 25426.8 1019.46   1
   9   1   6 4025.30 461.285   1
   9  -1   6 3226.43 421.844   1
   9   1   7 7248.76 637.073   1
   9  -1   7 6832.02 620.578   1
   9   1   8 4027.06 516.880   1
   9  -1   8 4902.65 553.647   1
   9   1   9 11802.2 892.311   1
   9  -1   9 12237.5 900.739   1
   9   1  10 5564.26 674.685   1
   9  -1  10 5753.72 674.782   1
   9   1  11 12695.0 1022.12   1
   9  -1  11 11821.3 979.529   1
   9  -1  12 2433.42 515.247   1
   9   1  12 2784.99 556.503   1
   9   1  13 3829.00 673.823   1
   9  -1  13 4256.36 672.974   1
   9   1  14 3790.14 697.276   1
   9  -1  14 3509.12 673.444   1
  -9  -3 -11 367.684 232.802   3
  -9  -3 -10 6284.88 642.668   3
  -9  -3  -9 1162.04 310.722   3
  -9  -3  -8 15827.3 948.648   3
  -9  -3  -7 2968.90 425.880   3
  -9  -3  -6 22882.2 1077.66   3
   9   3  -5 827.959 125.007   1
   9   3  -4 30632.6 595.361   1
   9  -3   0 21202.8 787.639   2
  -9   3   1 6862.21 318.108   1
   9  -3   1 7581.73 491.892   2
   9   3   2 21253.4 956.518   2
   9  -3   2 22189.5 856.968   2
   9   3   3 2520.08 393.770   2
   9  -3   3 2314.54 316.780   2
   9   3   4 31902.1 1228.17   2
   9  -3   5 923.060 253.176   1
   9   3   5 1016.83 276.447   2
   9  -3   6 21730.5 1013.35   1
   9   3   6 20923.9 1049.91   2
   9   3   6 21594.4 1018.52   1
  -9   3   6 21340.9 575.064   1
   9  -3   7 3931.23 485.204   1
   9   3   7 3465.72 459.369   1
  -9   3   7 3010.03 249.394   1
  -9   3   8 17471.8 648.949   1
   9  -3   8 16777.7 1003.90   1
   9   3   8 16992.4 1020.79   1
   9  -3   9 614.898 305.980   1
   9   3   9 1137.13 369.034   1
   9  -3  10 6944.45 735.936   1
   9   3  10 6691.74 725.026   1
   9   3  11 192.469 278.130   1
   9   3  12 3996.50 655.539   1
   9   3  13 381.904 332.809   1
   9   3  14 8126.91 965.164   1
  -9  -5 -12 4375.21 610.632   3
  -9  -5 -11 4708.26 615.088   3
  -9  -5 -10 1442.49 369.386   3
  -9  -5  -9 7824.59 747.339   3
  -9  -5  -8 6863.55 676.453   3
  -9  -5  -7 10836.3 817.899   3
  -9  -5  -6 4102.56 506.331   3
  -9  -5  -5 12172.2 813.642   3
  -9  -5  -4 11274.8 762.063   3
  -9  -5  -3 14041.1 820.737   3
   9  -5  -2 36435.5 886.481   2
   9  -5  -1 9836.29 486.486   2
   9  -5   0 1669.90 227.867   2
   9  -5   1 9780.56 528.816   2
   9   5   3 14991.8 876.716   2
   9   5   4 9837.42 719.972   2
   9   5   5 10721.7 757.407   2
   9   5   6 2266.38 386.190   2
   9   5   9 8721.59 797.895   1
   9   5  10 3681.09 579.338   1
   9   5  11 5385.22 716.709   1
   9   5  12 5188.13 742.738   1
   9   5  13 4867.97 758.014   1
  -9  -7 -12 737.511 365.026   3
  -9  -7 -11 8537.59 870.053   3
  -9  -7 -10 2762.63 526.703   3
  -9  -7  -9 10933.1 931.926   3
  -9  -7  -8 994.787 339.175   3
  -9  -7  -7 21192.7 1198.30   3
  -9  -7  -6 3223.61 493.377   3
  -9  -7  -5 7587.58 689.469   3
   9  -7  -4 1293.68 171.361   2
  -9  -7  -4 766.289 262.947   3
  -9  -7  -3 17643.9 970.261   3
   9  -7  -3 17723.8 483.598   2
   9  -7  -2 911.927 133.022   2
  -9  -7  -2 1069.37 280.775   3
  -9  -7  -1 17970.5 923.665   3
  -9  -7   0 2987.75 379.494   3
  -9  -7   1 18090.4 874.977   3
  -9  -7   2 1430.07 268.478   3
   9   7   3 17690.0 976.360   2
  -9  -7   3 16666.5 777.001   3
   9   7   4 530.100 293.250   2
  -9  -7   4 575.457 187.559   3
  -9  -7   5 9755.70 546.175   3
   9   7   5 9649.80 744.675   2
  -9  -7   6 4077.80 330.504   3
   9   7   6 3741.38 494.299   2
   9   7   7 22800.2 1178.41   2
   9   7  11 9201.83 936.287   1
   9   7  12 812.226 385.498   1
   9   7  13 3443.44 664.883   1
  -9  -9 -13 636.238 381.381   3
  -9  -9 -12 7008.15 871.576   3
  -9  -9 -11 972.067 380.067   3
  -9  -9 -10 7270.40 838.089   3
  -9  -9  -9 3532.39 603.227   3
  -9  -9  -8 6021.93 725.451   3
  -9  -9  -7 1492.74 401.064   3
  -9  -9  -6 19689.8 1198.87   3
  -9  -9  -5 1154.33 357.597   3
  -9  -9  -4 11690.3 888.180   3
  -9  -9  -3 147.877 187.346   3
  -9  -9  -2 11791.7 825.569   3
  -9  -9  -1 3386.75 449.262   3
  -9  -9   0 13924.4 845.885   3
  -9  -9   1 2865.71 397.061   3
  -9  -9   2 13172.0 771.377   3
   9   9   3 1892.63 501.969   2
  -9  -9   3 98.5264 138.003   3
  -9  -9   4 12303.9 692.630   3
   9   9   4 9603.66 759.853   2
  -9  -9   5 1589.43 258.358   3
   9   9   5 1058.12 296.729   2
   9   9   6 18357.9 1053.90   2
   9   9   7 2064.74 404.495   2
   9   9  12 8408.84 959.470   1
  -9 -11 -12 2397.00 583.983   3
  -9 -11 -11 1187.01 462.698   3
  -9 -11 -10 6436.02 834.986   3
  -9 -11  -9 1885.87 484.111   3
  -9 -11  -8 2527.85 533.268   3
  -9 -11  -7 7093.76 807.075   3
  -9 -11  -6 8830.77 877.300   3
  -9 -11  -5 1513.06 416.046   3
  -9 -11  -4 11904.7 956.795   3
  -9 -11  -3 11720.8 914.548   3
  -9 -11  -2 5943.06 649.019   3
  -9 -11  -1 3890.36 526.345   3
  -9 -11   0 11154.0 828.913   3
  -9 -11   1 4786.38 540.904   3
  -9 -11   2 7653.31 650.658   3
   9  11   3 9808.49 795.427   2
  -9 -11   3 11545.6 763.069   3
   9  11   4 10280.0 814.874   2
  -9 -11   4 12375.2 760.921   3
   9  11   5 1608.20 367.138   2
  -9 -11   5 2111.11 317.381   3
   9  11   6 7484.43 703.318   2
   9  11   7 5232.79 598.873   2
  -9 -13 -11 3475.36 709.567   3
  -9 -13 -10 63.1200 318.974   3
  -9 -13  -9 8472.26 1001.50   3
  -9 -13  -8 63.5788 300.427   3
  -9 -13  -7 7624.92 892.440   3
  -9 -13  -6-123.490 299.833   3
  -9 -13  -5 8918.41 913.655   3
  -9 -13  -4 16.9198 246.881   3
  -9 -13  -3 8937.93 883.444   3
  -9 -13  -2 1232.74 379.436   3
  -9 -13  -1 18640.7 1175.74   3
  -9 -13   0 4.70970 247.485   3
  -9 -13   1 15019.7 1008.33   3
  -9 -13   2 875.229 289.954   3
   9  13   3 9419.69 817.408   2
  -9 -13   3 9997.61 774.698   3
  -9 -13   4 266.252 201.858   3
   9  13   4 414.799 307.526   2
   9  13   5 7947.41 743.357   2
   9  13   6 3.63322 197.676   2
  -9 -15  -9 4551.81 778.201   3
  -9 -15  -8 3715.50 712.533   3
  -9 -15  -7 2650.65 599.585   3
  -9 -15  -6 6872.36 897.416   3
  -9 -15  -5 418.938 334.022   3
  -9 -15  -4 6962.63 848.736   3
  -9 -15  -3 3066.55 583.659   3
  -9 -15  -2 5625.57 738.918   3
  -9 -15  -1 2128.94 478.335   3
  -9 -15   0 9549.88 895.279   3
  -9 -15   1 1954.96 443.428   3
  -9 -15   2 4433.61 603.037   3
   9  15   3 4026.85 587.515   2
  -9 -15   3 3414.07 522.498   3
  -9 -17  -6 5866.86 884.266   3
  -9 -17  -5 2664.79 609.964   3
  -9 -17  -4 7422.95 947.582   3
  -9 -17  -3 162.869 274.797   3
  -9 -17  -2 5245.43 766.019   3
  -9 -17  -1 1876.60 475.921   3
  -9 -17   0 5995.07 775.722   3
  -9 -17   1 2257.05 504.295   3
  -9 -17   2 5651.35 716.379   3
  -9 -19  -3 4997.13 822.938   3
  -9 -19  -2 1100.38 443.784   3
  -9 -19  -1 7368.08 940.587   3
  -9 -19   0 467.221 389.293   3
  -9 -19   1 6474.97 830.944   3
 -10   0 -10 18051.5 1016.47   3
 -10   0  -9 19.9653 170.494   3
  10   0  -1 211.490 71.7209   1
  10   0   0 126975. 1378.70   1
  10   0   1 168.683 122.484   1
  10   0   1 982.131 330.752   2
  10   0   2 32408.9 916.761   1
  10   0   2 32003.8 1162.36   2
  10   0   3-186.352 231.118   2
  10   0   3 74.7595 142.231   1
  10   0   4 32597.8 1093.91   1
  10   0   4 29635.8 1176.76   2
  10   0   5 395.861 228.980   1
  10   0   5-71.7846 215.625   2
  10   0   6 26404.1 1128.77   1
  10   0   7 0.22586 200.849   1
  10   0   8 11893.1 863.705   1
  10   0   9-70.3950 228.266   1
  10   0  10 15885.3 1096.37   1
  10   0  11 112.308 271.247   1
  10   0  12 6683.65 798.575   1
  10   0  13-244.402 305.702   1
  10   0  14 8941.67 1001.64   1
 -10  -2 -11 8723.22 771.398   3
 -10  -2 -10 5111.15 585.681   3
 -10   2 -10 4696.57 513.120   3
 -10  -2  -9 14915.7 955.271   3
 -10  -2  -8 3763.47 484.773   3
 -10  -2  -7 7652.25 657.479   3
  10  -2   0 16132.8 757.394   2
 -10   2   1 37704.5 670.507   1
  10  -2   1 38432.0 1184.24   2
  10   2   2 10487.4 717.741   2
  10  -2   2 10001.3 522.420   1
 -10   2   2 8983.26 251.126   1
  10  -2   2 9115.44 607.450   2
  10  -2   3 30759.7 1117.57   2
  10   2   3 29568.4 1179.72   2
  10  -2   3 30121.8 981.868   1
  10  -2   4 12033.0 747.896   2
  10   2   4 12898.6 704.950   1
  10  -2   4 12028.9 677.582   1
  10   2   4 12817.5 811.045   2
  10   2   5 25629.0 1147.80   2
  10  -2   5 25641.7 1044.82   1
  10   2   5 25405.1 1050.55   1
  10   2   6 11028.6 792.224   2
  10  -2   6 10983.3 745.483   1
 -10   2   6 10229.9 298.996   1
  10   2   6 11701.6 768.661   1
  10  -2   7 6086.67 607.763   1
 -10   2   7 5794.36 282.485   1
  10   2   7 5497.49 578.394   1
  10   2   8 3329.94 495.077   1
  10  -2   8 2994.28 457.866   1
  10   2   9 14498.4 1007.08   1
  10  -2   9 15127.8 1021.70   1
  10   2  10 4390.46 614.143   1
  10  -2  10 5497.04 676.065   1
  10   2  11 8987.04 882.277   1
  10  -2  11 8525.60 872.537   1
  10   2  12 3831.65 647.377   1
  10  -2  12 3497.87 624.121   1
  10   2  13 6219.69 821.675   1
  10   2  14 180.076 382.469   1
 -10  -4 -12 1615.29 412.784   3
 -10  -4 -11 4472.85 598.661   3
 -10  -4 -10 2984.41 500.343   3
 -10  -4  -9 13063.8 941.251   3
 -10  -4  -8 5457.14 619.095   3
 -10  -4  -7 28793.2 1312.31   3
 -10  -4  -6 2516.84 420.090   3
 -10  -4  -5 17240.7 969.732   3
  10  -4  -1 12991.6 624.367   2
  10  -4   0 4032.75 371.554   2
  10  -4   1 12418.1 641.710   2
  10   4   2 6693.47 633.625   2
  10  -4   2 5848.53 480.758   2
  10   4   3 34392.5 1312.23   2
  10   4   4 9624.83 729.069   2
  10   4   5 14703.8 912.328   2
  10   4   6 2375.33 418.379   2
  10   4   7 30172.5 1312.49   1
 -10   4   7 29111.3 754.645   1
  10   4   8 5569.60 623.420   1
  10   4   9 13076.9 984.537   1
  10   4  10 3228.91 545.317   1
  10   4  11 5020.27 704.285   1
  10   4  12 1247.82 398.404   1
  10   4  13 6350.11 862.757   1
 -10  -6 -12 7847.39 852.318   3
 -10  -6 -11 34.2248 213.874   3
 -10  -6 -10 7295.25 779.559   3
 -10  -6  -9 49.4076 220.412   3
 -10  -6  -8 15707.5 1055.73   3
 -10  -6  -7 1234.23 356.924   3
 -10  -6  -6 22424.6 1196.40   3
 -10  -6  -5 2745.27 436.332   3
 -10  -6  -4 19765.2 1067.67   3
  10  -6  -3 6944.35 411.390   2
 -10  -6  -3 5042.79 545.936   3
 -10  -6  -2 28815.7 1209.36   3
  10  -6  -2 30302.0 818.677   2
  10  -6  -1 273.695 124.013   2
  10  -6   0 21998.3 766.107   2
  10   6   3 7235.76 678.392   2
  10   6   4 16661.4 979.642   2
  10   6   5 3281.99 469.072   2
  10   6   6 20385.2 1106.14   2
  10   6   7 1204.48 340.407   2
  10   6  10 9006.33 879.578   1
  10   6  11 438.010 290.959   1
  10   6  12 7651.11 890.597   1
  10   6  13 681.274 365.394   1
 -10  -8 -13 1122.63 412.086   3
 -10  -8 -12 3235.39 617.921   3
 -10  -8 -11 5299.20 746.236   3
 -10  -8 -10 2396.95 508.059   3
 -10  -8  -9 4321.22 639.941   3
 -10  -8  -8 4608.51 652.716   3
 -10  -8  -7 9207.37 856.237   3
 -10  -8  -6 3995.63 567.886   3
 -10  -8  -5 6367.12 672.183   3
 -10  -8  -4 5624.58 618.779   3
 -10  -8  -3 11789.9 843.437   3
  10  -8  -3 11079.3 359.063   2
 -10  -8  -2 17206.0 989.087   3
 -10  -8  -1 9610.49 731.833   3
 -10  -8   0 17385.8 948.554   3
 -10  -8   1 12528.5 780.275   3
 -10  -8   2 19620.0 942.368   3
  10   8   3 10909.5 837.064   2
 -10  -8   3 10599.5 676.899   3
 -10  -8   4 6193.59 503.753   3
  10   8   4 5027.03 608.622   2
 -10  -8   5 8324.05 548.721   3
  10   8   5 6888.29 661.245   2
 -10  -8   6 5633.56 430.682   3
  10   8   6 4977.88 586.350   2
  10   8   7 8608.04 769.579   2
  10   8  11 6515.33 826.596   1
  10   8  12 3646.86 680.007   1
 -10 -10 -13 2662.10 590.293   3
 -10 -10 -12 362.926 312.562   3
 -10 -10 -11 7441.04 919.527   3
 -10 -10 -10 443.721 351.231   3
 -10 -10  -9 4993.06 726.359   3
 -10 -10  -8 507.350 334.913   3
 -10 -10  -7 7752.07 835.742   3
 -10 -10  -6 204.615 253.662   3
 -10 -10  -5 18622.2 1205.32   3
 -10 -10  -4 78.0161 221.095   3
 -10 -10  -3 11306.5 895.817   3
 -10 -10  -2 3473.84 507.621   3
 -10 -10  -1 17418.9 1035.29   3
 -10 -10   0-48.2774 180.861   3
 -10 -10   1 17509.1 983.195   3
 -10 -10   2 4318.80 497.756   3
  10  10   3 9961.09 823.118   2
 -10 -10   3 12086.7 771.553   3
 -10 -10   4 272.819 176.423   3
  10  10   4 503.925 313.954   2
 -10 -10   5 19278.2 893.056   3
  10  10   5 17282.9 1072.52   2
  10  10   6 227.432 225.478   2
  10  10   7 9077.80 801.923   2
  10  10  12 475.300 368.892   1
 -10 -12 -11 2561.29 573.166   3
 -10 -12 -10 2448.01 599.311   3
 -10 -12  -9 3489.26 678.898   3
 -10 -12  -8 7451.60 902.620   3
 -10 -12  -7 125.831 309.092   3
 -10 -12  -6 6767.18 818.572   3
 -10 -12  -5 6295.83 777.567   3
 -10 -12  -4 7873.37 827.640   3
 -10 -12  -3 762.782 361.394   3
 -10 -12  -2 13600.6 1015.77   3
 -10 -12  -1 994.852 317.104   3
 -10 -12   0 9981.49 834.447   3
 -10 -12   1 1375.10 342.124   3
 -10 -12   2 13350.1 906.712   3
 -10 -12   3 1143.50 301.622   3
  10  12   3 1527.22 485.304   2
  10  12   4 7261.50 741.782   2
 -10 -12   4 9357.79 713.397   3
  10  12   5 4285.55 579.511   2
  10  12   6 5920.22 656.505   2
  10  12   7 452.098 274.263   2
 -10 -14  -9 1821.69 562.991   3
 -10 -14  -8 8311.35 1004.23   3
 -10 -14  -7 531.169 371.941   3
 -10 -14  -6 4602.11 737.208   3
 -10 -14  -5 2099.71 513.205   3
 -10 -14  -4 5042.73 724.627   3
 -10 -14  -3 3793.14 620.578   3
 -10 -14  -2 7971.46 858.087   3
 -10 -14  -1 2727.12 530.271   3
 -10 -14   0 10551.3 915.026   3
 -10 -14   1 2065.48 437.275   3
 -10 -14   2 7343.77 730.026   3
  10  14   3 4737.77 655.902   2
 -10 -14   3 4102.52 540.849   3
  10  14   4 5885.19 694.160   2
  10  14   5 1192.31 353.760   2
 -10 -16  -7 4594.88 796.111   3
 -10 -16  -6 198.891 366.648   3
 -10 -16  -5 10790.0 1117.25   3
 -10 -16  -4 381.671 342.413   3
 -10 -16  -3 6224.62 834.374   3
 -10 -16  -2 1336.89 457.508   3
 -10 -16  -1 8327.60 926.049   3
 -10 -16   0 497.488 334.433   3
 -10 -16   1 8267.67 857.338   3
 -10 -16   2 893.637 350.808   3
  10  16   2 2205.45 574.924   2
 -10 -16   3 6283.89 709.987   3
 -10 -18  -4 4341.77 779.748   3
 -10 -18  -3 4010.07 745.272   3
 -10 -18  -2 2672.38 623.400   3
 -10 -18  -1 2512.46 566.835   3
 -10 -18   0 4591.45 716.545   3
 -10 -18   1 3078.06 575.165   3
 -10 -18   2 1802.99 465.134   3
 -10 -20   0 6693.84 909.241   3
 -11  -1 -11 8523.32 756.719   3
 -11  -1 -10 1834.65 376.436   3
 -11   1 -10 1926.19 378.686   3
 -11  -1  -9 11239.8 844.568   3
  11   1  -1 31732.5 608.372   1
  11  -1   0 11556.5 701.182   2
  11   1   0 9126.58 408.193   1
  11   1   1 33339.5 1220.51   2
  11   1   1 32907.4 867.074   1
  11  -1   1 32738.8 856.444   1
  11  -1   1 33262.3 1176.71   2
  11  -1   2 7059.45 456.410   1
  11  -1   2 7370.30 594.601   2
  11   1   2 7459.27 467.470   1
  11   1   2 7813.16 640.397   2
  11  -1   3 11725.6 634.522   1
  11  -1   3 11598.1 749.598   2
  11   1   3 11149.9 769.591   2
  11   1   3 12281.5 646.745   1
  11   1   4 9222.45 614.133   1
  11  -1   4 9681.91 624.556   1
  11  -1   4 9121.32 684.170   2
  11   1   4 9364.16 714.190   2
  11   1   5 31317.9 1174.74   1
  11  -1   5 30052.6 1145.68   1
  11  -1   5 30123.8 1267.69   2
  11   1   5 30525.4 1288.96   2
  11  -1   6 2727.20 406.440   1
  11   1   6 2278.33 405.588   2
  11   1   6 2572.16 401.533   1
  11   1   7 9881.30 767.564   1
  11  -1   7 10103.8 768.416   1
  11  -1   8 2752.96 465.829   1
  11   1   8 3099.56 479.038   1
  11   1   9 10188.2 863.300   1
  11  -1   9 11246.0 894.890   1
  11   1  10 1444.96 415.883   1
  11  -1  10 1647.72 438.858   1
  11   1  11 9844.17 937.770   1
  11  -1  11 8852.19 895.464   1
  11  -1  12 530.048 361.383   1
  11   1  12 1018.97 427.842   1
  11   1  13 4851.05 756.867   1
  11  -1  13 4481.12 739.597   1
 -11  -3 -11 1972.06 432.941   3
 -11  -3 -10 13384.0 979.669   3
 -11  -3  -9 803.197 313.283   3
 -11  -3  -8 17525.3 1062.46   3
 -11  -3  -7 3939.53 513.739   3
  11   3  -5 1065.07 106.626   1
  11   3  -4 24934.0 452.187   1
  11  -3  -1 2257.27 351.770   2
  11  -3   0 30474.4 1058.46   2
  11  -3   1 1091.48 251.287   2
  11   3   2 33811.6 1312.24   2
 -11   3   2 32110.8 606.650   1
  11  -3   2 32201.4 1138.28   2
  11  -3   3 1604.94 314.268   2
 -11   3   3 1625.80 115.765   1
  11   3   3 2136.43 418.418   2
  11   3   4 25674.0 1195.75   2
  11   3   5 1680.60 381.586   2
  11   3   5 1456.16 305.603   1
  11  -3   6 13667.2 849.915   1
 -11   3   6 12053.8 311.703   1
  11   3   6 12281.3 866.414   2
  11   3   6 12958.6 830.453   1
  11  -3   7 3874.84 501.024   1
  11   3   7 4431.96 552.321   1
  11  -3   8 16783.7 1039.72   1
  11   3   8 16367.6 1039.06   1
  11  -3   9 950.624 361.304   1
  11   3   9 798.449 353.058   1
  11   3  10 13291.9 1034.30   1
  11   3  11 2057.15 506.974   1
  11   3  12 7229.83 865.053   1
  11   3  13 94.3748 304.995   1
 -11  -5 -12 4822.71 674.885   3
 -11  -5 -11 4571.60 644.537   3
 -11  -5 -10 1971.25 439.970   3
 -11  -5  -9 8304.13 795.567   3
 -11  -5  -8 13362.4 976.027   3
 -11  -5  -7 13287.5 952.621   3
 -11  -5  -6 12432.9 905.383   3
 -11  -5  -5 8448.05 728.792   3
 -11  -5  -4 15065.0 935.798   3
  11  -5  -2 25919.3 882.819   2
  11  -5  -1 11313.2 600.536   2
  11  -5   0 7097.59 492.612   2
  11  -5   1 10464.8 611.725   2
  11   5   2 24722.4 1181.18   2
  11  -5   2 24114.2 964.111   2
  11   5   3 12147.9 864.405   2
  11   5   4 11762.7 847.974   2
  11   5   5 7935.02 713.003   2
  11   5   6 11156.3 848.891   2
  11   5   7 9743.25 822.801   2
  11   5   8 12947.2 952.415   1
  11   5   9 8817.29 828.963   1
  11   5  10 2923.04 563.074   1
  11   5  11 4396.00 684.253   1
  11   5  12 4470.72 710.383   1
  11   5  13 4667.51 743.761   1
 -11  -7 -12 296.273 308.443   3
 -11  -7 -11 8372.14 905.174   3
 -11  -7 -10 894.859 373.396   3
 -11  -7  -9 11298.2 988.245   3
 -11  -7  -8 590.081 331.246   3
 -11  -7  -7 23734.6 1324.46   3
 -11  -7  -6 3856.16 546.186   3
 -11  -7  -5 15507.1 1026.92   3
  11  -7  -4 5952.89 382.682   2
 -11  -7  -4 5126.17 587.091   3
 -11  -7  -3 35308.3 1452.22   3
  11  -7  -3 34747.0 868.758   2
  11  -7  -2 433.158 144.323   2
 -11  -7  -2 405.824 236.809   3
 -11  -7  -1 18632.4 1010.01   3
  11  -7  -1 18746.6 679.618   2
 -11  -7   0 492.101 244.538   3
 -11  -7   1 17835.5 932.664   3
 -11  -7   2 977.161 270.363   3
  11   7   3 32712.4 1410.64   2
 -11  -7   3 31991.0 1183.43   3
 -11  -7   4 3814.40 410.833   3
  11   7   4 4089.93 570.761   2
 -11  -7   5 16718.9 804.537   3
  11   7   5 14236.2 973.767   2
 -11  -7   6 3941.80 381.330   3
  11   7   6 3570.37 520.783   2
  11   7   7 21009.9 1217.89   2
  11   7  10 537.484 342.313   1
  11   7  11 7271.13 863.844   1
  11   7  12 1235.10 494.461   1
 -11  -9 -13 1248.16 464.851   3
 -11  -9 -12 5759.82 818.513   3
 -11  -9 -11 1596.94 475.612   3
 -11  -9 -10 6905.42 849.384   3
 -11  -9  -9 1172.84 403.739   3
 -11  -9  -8 7516.01 837.056   3
 -11  -9  -7 1667.42 446.201   3
 -11  -9  -6 17943.8 1193.14   3
 -11  -9  -5 4120.92 584.410   3
 -11  -9  -4 20697.5 1205.88   3
 -11  -9  -3 1857.86 392.516   3
 -11  -9  -2 24143.4 1236.70   3
 -11  -9  -1 6719.10 656.452   3
 -11  -9   0 26374.6 1225.63   3
 -11  -9   1 8087.99 679.384   3
 -11  -9   2 25060.7 1131.96   3
  11   9   3 3829.71 588.111   2
 -11  -9   3 2377.13 365.046   3
 -11  -9   4 18041.1 900.965   3
  11   9   4 14916.5 1014.04   2
 -11  -9   5 3624.00 399.815   3
  11   9   5 2667.18 457.330   2
  11   9   6 15731.5 1063.78   2
  11   9   7 1150.56 360.695   2
  11   9   8 4741.11 633.042   2
  11   9  11 1126.68 449.721   1
  11   9  12 4862.44 771.826   1
 -11 -11 -12 2763.86 628.404   3
 -11 -11 -11 1726.13 546.682   3
 -11 -11 -10 8246.88 979.721   3
 -11 -11  -9 1438.71 469.988   3
 -11 -11  -8 5003.99 732.108   3
 -11 -11  -7 6919.30 825.963   3
 -11 -11  -6 7380.11 829.935   3
 -11 -11  -5 1796.08 444.125   3
 -11 -11  -4 15337.1 1114.15   3
 -11 -11  -3 7662.70 783.518   3
 -11 -11  -2 11668.2 929.327   3
 -11 -11  -1 7618.61 739.652   3
 -11 -11   0 20981.4 1178.34   3
 -11 -11   1 8690.33 747.178   3
 -11 -11   2 12093.8 852.183   3
  11  11   3 6337.19 719.415   2
 -11 -11   3 7883.54 676.578   3
 -11 -11   4 13796.0 851.117   3
  11  11   4 10461.8 893.668   2
 -11 -11   5 2136.17 345.056   3
  11  11   5 1362.36 384.353   2
  11  11   6 4965.67 640.344   2
  11  11   7 6055.49 696.680   2
  11  11   8 2929.52 522.447   2
 -11 -13 -10-65.8194 341.998   3
 -11 -13  -9 9266.72 1064.11   3
 -11 -13  -8 218.232 355.177   3
 -11 -13  -7 7327.73 912.025   3
 -11 -13  -6 512.085 323.884   3
 -11 -13  -5 11310.9 1058.66   3
 -11 -13  -4 636.428 339.943   3
 -11 -13  -3 12291.2 1048.88   3
 -11 -13  -2 950.368 345.161   3
 -11 -13  -1 18428.6 1215.38   3
 -11 -13   0 1113.34 344.346   3
 -11 -13   1 16278.3 1085.75   3
 -11 -13   2 762.699 312.259   3
  11  13   3 11705.8 995.455   2
 -11 -13   3 12775.0 918.029   3
 -11 -13   4 347.381 211.676   3
  11  13   4 555.773 354.784   2
  11  13   5 10001.3 897.441   2
  11  13   6-109.219 279.144   2
  11  13   7 5939.52 701.503   2
 -11 -15  -8 4621.33 785.459   3
 -11 -15  -7 3721.72 718.416   3
 -11 -15  -6 8156.35 991.282   3
 -11 -15  -5 1869.66 527.427   3
 -11 -15  -4 6775.85 876.395   3
 -11 -15  -3 6067.67 810.909   3
 -11 -15  -2 4152.22 659.999   3
 -11 -15  -1 2964.37 569.771   3
 -11 -15   0 8290.59 869.265   3
 -11 -15   1 1634.76 426.548   3
  11  15   2 5672.73 746.414   2
 -11 -15   2 4482.80 623.879   3
  11  15   3 5746.24 739.708   2
 -11 -15   3 5501.81 660.439   3
  11  15   4 7070.43 795.197   2
 -11 -17  -5 2874.76 669.118   3
 -11 -17  -4 6879.97 927.138   3
 -11 -17  -3 545.348 327.789   3
 -11 -17  -2 5950.01 834.700   3
 -11 -17  -1 1198.19 418.821   3
 -11 -17   0 5869.75 787.235   3
 -11 -17   1 954.492 389.264   3
 -11 -17   2 5405.08 721.559   3
 -11 -19  -2 288.924 376.338   3
 -11 -19  -1 6009.50 865.319   3
 -11 -19   0 452.921 343.560   3
 -11 -19   1 6280.70 833.728   3
 -12   0 -11 298.072 249.521   3
 -12   0 -10 19396.6 1137.42   3
  12   0   0 52938.9 970.730   1
  12   0   1 242.050 132.750   1
  12   0   1 1237.26 370.499   2
  12   0   2 18443.1 735.828   1
  12   0   2 18834.8 972.922   2
  12   0   3 111.382 161.435   1
  12   0   3-197.278 282.579   2
  12   0   4 35668.0 1200.12   1
  12   0   4 34612.8 1375.29   2
  12   0   5 120.758 244.844   2
  12   0   5 172.359 204.843   1
  12   0   6 22955.4 1093.10   1
  12   0   7 171.180 210.663   1
  12   0   8 6096.15 655.342   1
  12   0   9-92.4873 260.867   1
  12   0  10 20688.9 1282.32   1
  12   0  11 27.9137 292.396   1
  12   0  12 6875.84 836.290   1
  12   0  13-110.889 327.675   1
 -12  -2 -11 4248.69 581.083   3
 -12  -2 -10 3600.01 535.328   3
 -12  -2  -9 11904.3 918.776   3
 -12  -2  -8 3812.58 520.506   3
  12   2  -2 7838.75 273.142   1
  12   2  -1 28380.2 647.751   1
  12  -2   0 10232.0 685.499   2
  12   2   0 8767.52 427.150   1
  12   2   1 25738.8 812.933   1
  12  -2   1 25483.6 1075.30   2
  12   2   2 9854.42 778.227   2
  12   2   2 9411.72 544.611   1
  12  -2   2 8585.44 654.165   2
  12  -2   3 16751.0 770.137   1
  12  -2   3 16751.2 911.533   2
  12   2   3 15610.8 753.358   1
  12   2   3 15771.3 960.413   2
  12  -2   4 9023.49 687.495   2
  12   2   4 9012.12 737.188   2
  12   2   4 8551.23 612.095   1
  12  -2   4 8716.38 612.918   1
  12   2   5 12165.2 860.883   2
  12  -2   5 13868.8 816.778   1
  12   2   5 14082.2 831.583   1
  12   2   6 8854.95 770.765   2
  12  -2   6 10447.1 752.267   1
  12   2   6 10727.1 767.697   1
  12   2   7 8255.11 717.994   1
  12  -2   7 8074.49 713.923   1
  12   2   8 3622.42 530.690   1
  12  -2   8 3958.36 549.486   1
  12   2   9 12570.2 973.119   1
  12  -2   9 12408.8 971.349   1
  12   2  10 3708.46 595.887   1
  12  -2  10 3223.96 560.683   1
  12  -2  11 3117.92 569.242   1
  12   2  11 3232.47 592.693   1
  12   2  12 3151.43 598.663   1
  12  -2  12 2815.16 598.283   1
  12   2  13 5661.61 819.580   1
 -12  -4 -12 834.170 360.698   3
 -12  -4 -11 8752.12 864.768   3
 -12  -4 -10 637.539 295.042   3
 -12  -4  -9 12245.9 960.299   3
 -12  -4  -8 945.411 335.807   3
 -12  -4  -7 19467.2 1159.41   3
 -12  -4  -6 1501.55 357.137   3
  12  -4  -1 23101.6 930.692   2
  12  -4   0 7381.11 548.453   2
  12  -4   1 20048.8 905.962   2
  12   4   2 6559.48 722.068   2
  12  -4   2 5114.88 492.194   2
 -12   4   3 20790.5 500.660   1
  12  -4   3 22592.6 1023.00   2
  12   4   3 21645.7 1152.24   2
  12   4   4 7622.63 714.381   2
  12   4   5 11804.9 869.405   2
  12   4   6 1705.60 390.399   2
  12   4   6 2026.54 378.565   1
  12   4   7 19392.1 1167.56   2
  12   4   7 19513.1 1103.72   1
  12   4   8 1337.61 385.417   1
  12   4   9 12384.8 980.846   1
  12   4  10 301.341 339.085   1
  12   4  11 7685.73 870.802   1
  12   4  12 921.616 422.356   1
  12   4  13 4948.74 782.680   1
 -12  -6 -12 7096.72 837.388   3
 -12  -6 -11 755.382 355.235   3
 -12  -6 -10 6464.39 776.335   3
 -12  -6  -9 1762.34 438.753   3
 -12  -6  -8 15762.0 1118.18   3
 -12  -6  -7 5497.19 670.315   3
 -12  -6  -6 13919.5 1009.26   3
 -12  -6  -5 872.701 324.859   3
 -12  -6  -4 22911.5 1220.98   3
  12  -6  -3 5098.23 434.078   2
 -12  -6  -3 4416.70 550.873   3
  12  -6  -2 39533.0 1089.25   2
  12  -6  -1 53.7862 157.586   2
  12  -6   0 16932.9 758.165   2
  12  -6   1 2.81083 144.451   2
  12   6   2 38977.1 1543.42   2
  12   6   3 4624.84 657.945   2
  12   6   4 20788.3 1161.45   2
  12   6   5 480.626 277.779   2
  12   6   6 12541.1 946.932   2
  12   6   7 4390.01 587.346   2
  12   6   9 1718.97 435.309   1
  12   6  10 7728.82 845.975   1
  12   6  11 431.688 329.739   1
  12   6  12 7440.46 913.524   1
 -12  -8 -13 767.054 390.483   3
 -12  -8 -12 3043.88 596.134   3
 -12  -8 -11 4444.09 720.895   3
 -12  -8 -10 3158.42 608.534   3
 -12  -8  -9 2874.24 537.938   3
 -12  -8  -8 8321.23 880.497   3
 -12  -8  -7 10872.7 955.500   3
 -12  -8  -6 11457.3 960.822   3
 -12  -8  -5 14456.8 1043.79   3
 -12  -8  -4 13295.0 979.778   3
 -12  -8  -3 9545.59 814.346   3
 -12  -8  -2 15693.7 1011.61   3
  12  -8  -2 16965.0 615.542   2
 -12  -8  -1 6746.44 662.908   3
 -12  -8   0 12033.9 845.128   3
 -12  -8   1 7686.66 671.109   3
 -12  -8   2 15918.0 919.315   3
  12   8   3 7277.85 759.304   2
 -12  -8   3 7450.73 620.184   3
 -12  -8   4 11476.6 747.140   3
  12   8   4 9952.46 859.923   2
 -12  -8   5 12642.1 741.513   3
  12   8   5 9331.31 837.516   2
  12   8   6 8411.79 811.503   2
  12   8   7 10873.4 911.805   2
  12   8   8 5882.09 715.740   2
  12   8  10 2864.00 585.044   1
  12   8  11 5231.19 770.512   1
  12   8  12 3122.28 662.063   1
 -12 -10 -12 598.617 366.482   3
 -12 -10 -11 8811.19 1021.72   3
 -12 -10 -10 693.444 350.322   3
 -12 -10  -9 8855.50 979.114   3
 -12 -10  -8 1552.41 450.350   3
 -12 -10  -7 9284.00 947.221   3
 -12 -10  -6 586.200 356.790   3
 -12 -10  -5 14263.6 1102.97   3
 -12 -10  -4 1840.78 408.586   3
 -12 -10  -3 13756.1 1020.62   3
 -12 -10  -2 1384.69 365.731   3
 -12 -10  -1 21525.3 1209.87   3
 -12 -10   0 4146.38 544.118   3
 -12 -10   1 24379.0 1214.13   3
 -12 -10   2 911.623 288.259   3
  12  10   3 12694.7 990.823   2
 -12 -10   3 14252.3 890.072   3
 -12 -10   4 1167.05 287.407   3
  12  10   4 1294.22 419.072   2
 -12 -10   5 16145.6 880.066   3
  12  10   5 10680.4 910.671   2
  12  10   6 166.092 291.369   2
  12  10   7 7808.24 814.249   2
  12  10   8 1672.97 424.963   2
 -12 -12 -10 5759.01 877.266   3
 -12 -12  -9 1196.54 455.239   3
 -12 -12  -8 6817.81 885.353   3
 -12 -12  -7 1212.89 457.730   3
 -12 -12  -6 4470.50 708.811   3
 -12 -12  -5 5759.28 779.242   3
 -12 -12  -4 8086.61 859.577   3
 -12 -12  -3 2502.21 519.821   3
 -12 -12  -2 14326.2 1086.74   3
 -12 -12  -1 7448.11 776.906   3
 -12 -12   0 18882.6 1188.15   3
 -12 -12   1 6528.28 704.676   3
 -12 -12   2 15484.4 1024.41   3
 -12 -12   3 2529.83 438.304   3
  12  12   3 2988.76 599.844   2
 -12 -12   4 9576.47 762.169   3
  12  12   4 7279.80 811.324   2
  12  12   5 4175.73 624.700   2
  12  12   6 2622.81 515.351   2
  12  12   7 697.784 340.117   2
  12  12   8 4157.13 617.561   2
 -12 -14  -8 7120.13 948.214   3
 -12 -14  -7 779.060 393.644   3
 -12 -14  -6 4989.81 781.578   3
 -12 -14  -5 1524.87 481.661   3
 -12 -14  -4 10488.2 1053.90   3
 -12 -14  -3 2839.05 573.635   3
 -12 -14  -2 9298.40 945.579   3
 -12 -14  -1 2892.98 547.320   3
 -12 -14   0 7590.23 821.197   3
 -12 -14   1 3187.31 551.407   3
 -12 -14   2 8067.98 798.542   3
  12  14   3 3382.63 614.693   2
 -12 -14   3 3944.23 559.905   3
  12  14   4 10078.4 953.717   2
  12  14   5 1214.21 402.001   2
  12  14   6 4684.38 659.616   2
 -12 -16  -6-76.0250 336.555   3
 -12 -16  -5 8981.92 1062.59   3
 -12 -16  -4 38.1092 270.068   3
 -12 -16  -3 4761.19 771.981   3
 -12 -16  -2 1090.20 420.945   3
 -12 -16  -1 7862.73 908.458   3
 -12 -16   0 190.597 284.745   3
 -12 -16   1 6428.16 782.425   3
 -12 -16   2 916.585 339.429   3
  12  16   2 2121.30 600.910   2
 -12 -18  -3 2664.20 619.227   3
 -12 -18  -2 1187.61 467.005   3
 -12 -18  -1 2015.42 558.338   3
 -12 -18   0 5449.24 811.532   3
 -12 -18   1 2521.52 573.821   3
 -13  -1 -11 8570.86 826.460   3
 -13  -1 -10 2825.84 490.456   3
 -13   1 -10 2472.31 451.444   3
 -13  -1  -9 12269.8 954.200   3
  13   1  -1 23385.0 565.394   1
  13  -1   0 13406.5 832.895   2
  13   1   0 10963.2 481.013   1
  13  -1   1 23807.8 777.774   1
  13   1   1 25765.9 1181.61   2
  13   1   1 24507.5 802.498   1
  13  -1   1 24114.0 1113.08   2
  13   1   2 6586.53 467.381   1
  13  -1   2 6979.01 479.226   1
  13  -1   2 6691.66 625.073   2
  13   1   2 6373.90 666.650   2
  13   1   3 12610.3 690.147   1
  13  -1   3 12325.7 677.887   1
  13  -1   3 12285.7 823.556   2
  13   1   3 13301.9 901.092   2
  13   1   4 12483.8 742.917   1
  13  -1   4 12975.4 750.247   1
  13  -1   4 11999.0 826.899   2
  13   1   4 11523.9 838.372   2
  13   1   5 22717.7 1053.61   1
  13  -1   5 22745.8 1047.55   1
  13  -1   5 21590.1 1142.15   2
  13   1   5 22609.6 1194.52   2
  13   1   6 4559.20 530.129   1
  13  -1   6 4140.36 504.057   1
  13   1   6 4067.88 560.162   2
  13   1   7 11066.4 843.181   1
  13  -1   7 12253.0 865.894   1
  13   1   8 2264.07 434.251   1
  13  -1   8 2443.98 451.815   1
  13   1   9 11975.8 967.449   1
  13  -1   9 11368.2 930.231   1
  13   1  10 2826.89 542.439   1
  13  -1  10 2654.94 514.968   1
  13   1  11 8178.60 872.051   1
  13  -1  11 8787.16 921.735   1
  13   1  12 841.661 414.576   1
  13  -1  12 794.923 408.675   1
  13   1  13 3533.11 667.223   1
  13  -1  13 3391.69 684.263   1
 -13  -3 -11 1444.12 396.454   3
 -13  -3 -10 7015.88 773.414   3
 -13  -3  -9 141.179 212.514   3
 -13  -3  -8 12796.3 977.516   3
  13  -3  -1 5725.85 541.582   2
  13  -3   0 37221.0 1289.96   2
  13  -3   1 4747.78 499.851   2
  13   3   2 27555.7 1292.06   2
  13  -3   2 26027.8 1121.12   2
  13  -3   3 548.905 242.394   2
  13   3   3 668.223 374.087   2
  13   3   3 888.142 249.028   1
  13  -3   4 24825.8 1165.27   2
  13   3   4 24418.7 1045.35   1
  13   3   4 23798.0 1232.60   2
  13   3   5 100.264 289.883   2
  13   3   5 584.097 239.668   1
  13   3   6 15568.4 1034.05   2
  13   3   6 17613.9 1008.15   1
  13   3   7 1722.21 406.704   2
  13   3   7 2002.06 406.905   1
  13   3   8 14183.2 1006.91   1
  13   3   9-41.3011 273.659   1
  13   3  10 7646.81 823.262   1
  13   3  11 2625.27 538.864   1
  13   3  12 6270.30 824.711   1
  13   3  13 138.021 342.124   1
 -13  -5 -12 3637.06 624.747   3
 -13  -5 -11 3452.69 596.364   3
 -13  -5 -10 2059.83 472.360   3
 -13  -5  -9 7218.61 798.042   3
 -13  -5  -8 11629.5 972.123   3
 -13  -5  -7 7259.76 757.330   3
 -13  -5  -6 3799.36 548.662   3
 -13  -5  -5 8175.72 758.503   3
  13  -5  -2 17185.4 822.815   2
  13  -5  -1 14481.3 757.868   2
  13  -5   0 13.1592 224.023   2
  13  -5   1 13765.8 763.963   2
  13   5   2 16387.6 1064.06   2
  13  -5   2 12814.2 767.579   2
  13   5   3 18327.8 1108.22   2
  13   5   4 3091.42 525.021   2
  13   5   5 7339.64 738.759   2
  13   5   6 3397.57 541.985   2
  13   5   7 6032.72 698.983   2
  13   5   7 7035.23 715.024   1
  13   5   8 10168.1 880.231   1
  13   5   9 9303.20 885.006   1
  13   5  10 3125.41 585.350   1
  13   5  11 3401.10 639.719   1
  13   5  12 2638.81 575.906   1
 -13  -7 -12 339.114 298.604   3
 -13  -7 -11 9067.94 974.973   3
 -13  -7 -10 511.434 337.396   3
 -13  -7  -9 6001.39 777.632   3
 -13  -7  -8 976.804 353.018   3
 -13  -7  -7 15470.2 1134.87   3
 -13  -7  -6 3076.25 528.207   3
 -13  -7  -5 10079.8 888.646   3
 -13  -7  -4 4666.50 598.829   3
 -13  -7  -3 12199.4 925.474   3
  13  -7  -3 13022.7 624.826   2
  13  -7  -2 1347.60 229.489   2
 -13  -7  -2 2168.52 429.408   3
 -13  -7  -1 9813.53 785.336   3
  13  -7  -1 9384.31 564.020   2
  13  -7   0 2181.95 299.381   2
  13   7   2 5533.82 749.236   2
  13   7   3 11897.9 944.621   2
  13   7   4 3436.51 552.247   2
  13   7   5 7892.32 776.083   2
  13   7   6 2164.69 462.865   2
  13   7   7 13884.6 1057.52   2
  13   7   8 672.746 322.014   2
  13   7   9 5948.09 743.405   1
  13   7  10 219.856 304.346   1
  13   7  11 8060.90 942.001   1
  13   7  12 889.034 462.799   1
 -13  -9 -12 5526.70 843.802   3
 -13  -9 -11 565.636 352.541   3
 -13  -9 -10 5872.98 806.981   3
 -13  -9  -9 1210.63 450.980   3
 -13  -9  -8 7710.21 883.281   3
 -13  -9  -7 134.414 266.839   3
 -13  -9  -6 11913.3 1022.22   3
 -13  -9  -5 1509.88 408.079   3
 -13  -9  -4 10431.0 909.606   3
 -13  -9  -3 2097.48 448.099   3
 -13  -9  -2 12634.0 955.067   3
 -13  -9  -1 1475.99 361.721   3
 -13  -9   0 14190.4 964.336   3
 -13  -9   1 1514.01 355.109   3
 -13  -9   2 12854.6 878.714   3
 -13  -9   3 2790.67 423.517   3
  13   9   3 3238.19 594.646   2
 -13  -9   4 8230.15 671.859   3
  13   9   4 7151.15 786.266   2
  13   9   5 1399.07 412.343   2
 -13  -9   5 1709.43 322.630   3
  13   9   6 8254.70 841.005   2
  13   9   7 171.884 227.368   2
  13   9   8 5920.98 743.932   2
  13   9  11 915.108 451.911   1
 -13 -11 -11 1987.67 594.292   3
 -13 -11 -10 3094.28 654.896   3
 -13 -11  -9 2190.89 549.803   3
 -13 -11  -8 1841.06 517.247   3
 -13 -11  -7 3108.40 595.267   3
 -13 -11  -6 6580.89 822.650   3
 -13 -11  -5 1450.23 469.003   3
 -13 -11  -4 7298.53 822.238   3
 -13 -11  -3 5608.15 705.518   3
 -13 -11  -2 5337.23 678.406   3
 -13 -11  -1 952.819 344.687   3
 -13 -11   0 20869.1 1231.16   3
 -13 -11   1 915.932 300.944   3
 -13 -11   2 5791.84 635.380   3
  13  11   3 5829.94 763.025   2
 -13 -11   3 5525.52 602.118   3
 -13 -11   4 7264.98 668.320   3
  13  11   4 5330.62 717.151   2
  13  11   5 858.195 356.826   2
  13  11   6 5567.80 717.910   2
  13  11   7 2086.44 457.601   2
  13  11   8 1815.19 448.233   2
 -13 -13  -9 5834.02 885.740   3
 -13 -13  -8 439.197 346.553   3
 -13 -13  -7 4306.24 750.284   3
 -13 -13  -6-73.9589 282.829   3
 -13 -13  -5 6462.16 849.399   3
 -13 -13  -4 631.791 359.848   3
 -13 -13  -3 11481.7 1055.42   3
 -13 -13  -2 230.126 284.360   3
 -13 -13  -1 11617.1 1005.74   3
 -13 -13   0 518.328 300.986   3
 -13 -13   1 9792.94 896.067   3
 -13 -13   2 176.966 226.894   3
 -13 -13   3 12557.2 946.688   3
  13  13   3 11541.7 1034.09   2
  13  13   4 931.539 430.414   2
  13  13   5 4371.10 678.524   2
  13  13   6-334.606 371.369   2
  13  13   7 3541.79 608.692   2
  13  13   8 24.3511 254.050   2
 -13 -15  -6 3880.49 739.076   3
 -13 -15  -5 2130.48 563.128   3
 -13 -15  -4 4790.35 783.444   3
 -13 -15  -3 3350.28 643.982   3
 -13 -15  -2 3643.95 656.741   3
 -13 -15  -1 3010.82 602.336   3
 -13 -15   0 7767.97 876.642   3
 -13 -15   1 2718.33 543.200   3
  13  15   2 5178.38 768.715   2
 -13 -15   2 3151.64 557.483   3
 -13 -15   3 3048.22 532.762   3
  13  15   3 3095.10 626.880   2
  13  15   4 6946.41 838.202   2
  13  15   5 1484.28 408.004   2
 -13 -17  -4 5588.69 876.125   3
 -13 -17  -3 203.202 288.178   3
 -13 -17  -2 4704.04 746.913   3
 -13 -17  -1 670.056 342.281   3
 -13 -17   0 3705.68 672.601   3
 -13 -17   1 1532.27 463.077   3
 -13 -17   2 4558.67 682.388   3
 -13 -19   0 37.3896 271.611   3
 -14   0 -11 40.0290 229.430   3
 -14   0 -10 12163.6 974.848   3
  14   0   0 39979.9 1478.40   2
  14   0   0 43562.8 936.155   1
  14   0   1 74.6114 126.104   1
  14   0   1 763.805 403.853   2
  14   0   2 12338.8 639.529   1
  14   0   2 12563.9 873.558   2
  14   0   3-149.170 301.465   2
  14   0   3 9.30078 146.521   1
  14   0   4 18957.1 923.548   1
  14   0   4 18954.6 1093.19   2
  14   0   5-7.43524 263.292   2
  14   0   5 58.8202 204.003   1
  14   0   6 9379.03 740.880   1
  14   0   6 9897.57 847.104   2
  14   0   7 95.2768 195.429   1
  14   0   8 5992.91 677.010   1
  14   0   9-73.8112 237.310   1
  14   0  10 12337.8 1046.07   1
  14   0  11 185.739 311.057   1
  14   0  12 3713.17 686.934   1
 -14  -2 -11 2826.29 519.364   3
 -14  -2 -10 4511.36 645.184   3
 -14  -2  -9 7092.91 765.326   3
  14   2  -2 2495.61 159.467   1
  14   2  -1 12835.7 468.349   1
  14  -2  -1 14232.5 866.138   2
  14  -2   0 8490.84 713.876   2
  14   2   0 6884.43 407.393   1
  14   2   1 15133.4 1009.61   2
  14  -2   1 13194.3 850.604   2
  14   2   1 12873.5 615.007   1
  14  -2   2 2874.58 454.528   2
  14   2   2 3062.45 340.335   1
  14   2   2 4128.45 606.997   2
  14  -2   3 12999.5 861.337   2
  14   2   3 11774.8 891.899   2
  14   2   3 13037.2 729.407   1
  14  -2   4 5188.16 501.732   1
  14   2   4 4110.85 554.555   2
  14  -2   4 4507.40 549.306   2
  14   2   4 4307.40 468.498   1
  14   2   5 11988.3 801.501   1
  14  -2   5 11696.2 871.306   2
  14   2   5 11980.7 917.135   2
  14  -2   5 12146.3 797.593   1
  14   2   6 6626.07 639.225   1
  14   2   6 6701.68 708.907   2
  14  -2   6 6548.01 632.341   1
  14   2   7 4008.07 542.628   1
  14   2   7 3350.46 550.543   2
  14  -2   7 4528.72 576.413   1
  14   2   8 4885.60 620.521   1
  14  -2   8 3982.35 574.990   1
  14   2   9 7265.73 779.307   1
  14  -2   9 6728.14 758.853   1
  14  -2  10 4162.23 650.226   1
  14   2  10 3973.98 624.152   1
  14   2  11 2329.78 530.071   1
  14  -2  11 2821.83 592.317   1
  14   2  12 2299.88 549.525   1
 -14  -4 -12-192.032 270.126   3
 -14  -4 -11 5959.77 762.353   3
 -14  -4 -10 465.799 313.741   3
 -14  -4  -9 7590.13 832.061   3
 -14  -4  -8 2264.06 464.404   3
 -14  -4  -7 16524.5 1135.75   3
  14  -4  -2 6481.46 576.800   2
  14  -4  -1 4595.55 501.275   2
  14  -4   0 3883.04 459.221   2
  14  -4   1 2475.64 375.473   2
  14   4   2 5752.57 721.316   2
  14  -4   2 3808.05 463.356   2
  14  -4   3 18453.3 996.807   2
  14   4   3 20007.5 1200.30   2
  14   4   4 3586.18 565.140   2
  14   4   5 11295.8 801.146   1
  14   4   5 10822.7 895.872   2
  14   4   6 873.074 344.855   2
  14   4   6 1052.18 342.786   1
  14   4   7 12816.4 1020.39   2
  14   4   7 15639.7 1041.14   1
  14   4   8 3041.07 527.723   1
  14   4   9 9383.70 893.526   1
  14   4  10 1209.41 404.553   1
  14   4  11 6993.87 851.116   1
  14   4  12 7.98815 320.878   1
 -14  -6 -12 4761.74 738.152   3
 -14  -6 -11 508.721 348.395   3
 -14  -6 -10 5217.71 743.516   3
 -14  -6  -9 529.772 302.588   3
 -14  -6  -8 11058.4 997.020   3
 -14  -6  -7 1604.95 431.513   3
 -14  -6  -6 12357.4 1008.89   3
 -14  -6  -5 428.817 263.318   3
  14  -6  -4 11905.5 687.860   2
 -14  -6  -4 10967.6 898.800   3
  14  -6  -3 4003.82 427.161   2
  14  -6  -2 20309.0 891.188   2
  14  -6  -1 366.423 176.212   2
  14  -6   0 17946.8 867.206   2
  14  -6   1 739.818 231.124   2
  14   6   2 19046.1 1210.35   2
  14   6   3 4062.40 624.211   2
  14   6   4 8251.56 823.163   2
  14   6   5 2.91381 329.510   2
  14   6   6 10437.5 919.703   2
  14   6   7 1106.46 388.289   2
  14   6   8 9776.36 926.340   2
  14   6   8 12210.5 989.648   1
  14   6   9 539.470 307.471   1
  14   6  10 4919.66 732.216   1
  14   6  11 88.5776 266.100   1
  14   6  12 4847.84 770.083   1
 -14  -8 -12 2311.88 550.643   3
 -14  -8 -11 4074.23 711.167   3
 -14  -8 -10 2390.55 567.831   3
 -14  -8  -9 2584.91 568.196   3
 -14  -8  -8 3630.95 624.111   3
 -14  -8  -7 3355.64 589.997   3
 -14  -8  -6 3449.41 592.510   3
 -14  -8  -5 3194.08 568.839   3
 -14  -8  -4 5051.41 663.845   3
 -14  -8  -3 7891.46 796.215   3
 -14  -8  -2 12400.2 966.273   3
 -14  -8  -1 7057.56 718.965   3
  14  -8  -1 7353.89 504.586   2
 -14  -8   0 12950.2 938.613   3
 -14  -8   1 8019.24 732.229   3
  14   8   2 13950.3 1060.65   2
 -14  -8   2 11521.3 844.033   3
  14   8   3 7646.63 817.725   2
 -14  -8   3 7163.13 661.486   3
 -14  -8   4 4745.38 537.460   3
  14   8   4 4041.00 622.118   2
 -14  -8   5 3635.37 456.716   3
  14   8   5 3322.71 564.043   2
  14   8   6 2864.35 523.953   2
  14   8   7 2347.44 500.338   2
  14   8   8 2413.32 517.933   2
  14   8   9 1996.40 510.347   1
  14   8  10 3120.33 603.409   1
  14   8  11 5857.96 834.474   1
 -14 -10 -11 4750.21 801.897   3
 -14 -10 -10 85.7096 301.172   3
 -14 -10  -9 5080.19 797.058   3
 -14 -10  -8 1836.14 518.084   3
 -14 -10  -7 7623.18 894.789   3
 -14 -10  -6 1012.76 379.553   3
 -14 -10  -5 13041.4 1100.24   3
 -14 -10  -4 425.938 336.862   3
 -14 -10  -3 7598.57 813.800   3
 -14 -10  -2 1282.54 362.830   3
 -14 -10  -1 11189.0 937.622   3
 -14 -10   0 82.7387 218.446   3
 -14 -10   1 12911.0 956.920   3
 -14 -10   2 1496.72 354.562   3
  14  10   3 7852.77 857.651   2
 -14 -10   3 8551.54 741.443   3
 -14 -10   4 218.574 223.820   3
  14  10   4 70.5818 323.610   2
 -14 -10   5 13538.2 872.772   3
  14  10   5 10711.2 980.398   2
  14  10   6-140.079 355.022   2
  14  10   7 6276.67 769.703   2
  14  10   8 1237.55 412.114   2
 -14 -12  -9 1497.08 534.224   3
 -14 -12  -8 7797.03 988.930   3
 -14 -12  -7 853.481 419.305   3
 -14 -12  -6 6216.04 847.471   3
 -14 -12  -5 4715.32 725.667   3
 -14 -12  -4 7909.55 892.678   3
 -14 -12  -3 201.863 270.697   3
 -14 -12  -2 8892.71 904.459   3
 -14 -12  -1 3606.43 583.608   3
 -14 -12   0 3594.48 574.907   3
 -14 -12   1 2590.50 493.979   3
  14  12   2 9445.72 977.007   2
 -14 -12   2 8063.48 786.764   3
 -14 -12   3 372.271 266.656   3
  14  12   3 1041.24 496.180   2
 -14 -12   4 7575.14 719.302   3
  14  12   4 6847.90 821.746   2
  14  12   5 2334.50 495.916   2
  14  12   6 4342.78 647.651   2
  14  12   7 585.766 336.263   2
  14  12   8 6983.71 833.298   2
 -14 -14  -7 1518.05 494.965   3
 -14 -14  -6 2358.75 612.681   3
 -14 -14  -5 2450.17 593.567   3
 -14 -14  -4 5104.59 784.334   3
 -14 -14  -3 1036.56 434.504   3
 -14 -14  -2 5528.29 772.186   3
 -14 -14  -1 2083.48 482.947   3
 -14 -14   0 5503.31 728.975   3
 -14 -14   1 1722.00 443.339   3
 -14 -14   2 4870.46 658.694   3
  14  14   2 7182.52 888.236   2
 -14 -14   3 537.470 296.201   3
  14  14   3 1259.84 497.896   2
  14  14   4 5519.30 775.312   2
  14  14   5 1382.51 464.817   2
  14  14   6 267.978 343.427   2
 -14 -16  -4 124.635 365.585   3
 -14 -16  -3 4062.80 711.194   3
 -14 -16  -2 464.262 392.139   3
 -14 -16  -1 7298.94 916.250   3
 -14 -16   0 309.886 315.176   3
 -14 -16   1 6937.88 852.676   3
 -14 -16   2 137.072 299.861   3
  14  16   2 1631.25 568.929   2
  14  16   3 5933.35 819.120   2
 -14 -18  -1 831.785 398.687   3
 -14 -18   0 5419.65 826.532   3
 -14 -18   1 1426.99 477.019   3
 -15  -1 -11 5911.91 728.083   3
 -15  -1 -10 2443.13 498.362   3
  15   1  -1 17537.8 517.298   1
  15  -1   0 5834.55 659.303   2
  15   1   0 2654.23 267.109   1
  15   1   1 18205.9 1111.30   2
  15   1   1 16731.3 702.715   1
  15  -1   1 17215.5 1037.79   2
  15  -1   2 3761.40 381.479   1
  15   1   2 3334.03 356.556   1
  15  -1   2 3724.20 521.871   2
  15   1   2 3637.63 567.212   2
  15   1   3 2288.98 339.650   1
  15  -1   3 2266.76 403.985   2
  15   1   3 2187.65 467.455   2
  15  -1   3 2774.25 366.171   1
  15   1   4 3373.13 424.934   1
  15   1   4 3081.16 493.973   2
  15  -1   4 4381.19 563.427   2
  15  -1   4 4136.76 461.751   1
  15   1   5 13699.2 860.076   1
  15  -1   5 13713.9 980.271   2
  15  -1   5 13997.1 862.676   1
  15   1   5 12579.5 957.737   2
  15   1   6 2115.29 455.643   2
  15   1   6 2433.22 413.489   1
  15  -1   6 2544.28 439.819   1
  15   1   7 9909.75 829.298   1
  15  -1   7 9889.38 826.324   1
  15   1   8 2396.75 487.653   1
  15  -1   8 2287.66 463.941   1
  15   1   9 8658.28 857.994   1
  15  -1   9 8564.60 847.753   1
  15  -1  10 2205.41 521.550   1
  15   1  10 2144.52 518.043   1
  15   1  11 5617.29 763.726   1
  15  -1  11 5549.40 758.596   1
  15   1  12 672.216 415.650   1
  15  -1  12 1511.34 524.948   1
 -15  -3 -11 170.231 240.715   3
 -15  -3 -10 4648.26 678.935   3
 -15  -3  -9 93.3383 242.663   3
 -15  -3  -8 6251.68 743.417   3
  15   3  -2 14578.1 449.777   1
  15  -3  -1 5390.84 584.638   2
  15   3  -1 3552.00 284.868   1
  15   3   0 5501.75 395.812   1
  15  -3   0 7012.14 639.536   2
  15  -3   1 2988.56 453.494   2
  15   3   1 4046.45 374.501   1
  15   3   2 13517.7 1013.73   2
  15  -3   2 13897.4 896.521   2
  15   3   2 14669.8 748.942   1
  15  -3   3 1971.40 386.511   2
  15   3   3 1992.59 334.468   1
  15   3   3 2638.39 518.419   2
  15  -3   4 23911.7 1221.23   2
  15   3   4 23281.5 1304.13   2
  15   3   4 23900.5 1090.32   1
  15   3   5 77.1524 287.901   2
  15   3   5 301.177 239.801   1
  15   3   6 9776.02 895.159   2
  15   3   6 11293.1 850.137   1
  15   3   7 790.329 323.327   2
  15   3   7 1703.84 418.736   1
  15   3   8 7205.88 762.567   1
  15   3   9-127.573 251.863   1
  15   3  10 6012.62 764.472   1
  15   3  11 511.241 332.028   1
  15   3  12 3896.21 677.608   1
 -15  -5 -12 3241.82 635.024   3
 -15  -5 -11 1836.90 492.889   3
 -15  -5 -10 834.784 364.309   3
 -15  -5  -9 5068.37 714.261   3
 -15  -5  -8 5259.63 707.484   3
 -15  -5  -7 7539.41 821.294   3
 -15  -5  -6 4085.78 613.831   3
  15  -5  -3 5927.27 561.943   2
  15  -5  -2 15345.1 854.285   2
  15  -5  -1 7157.46 597.224   2
  15  -5   0 6893.57 595.787   2
  15  -5   1 7919.50 646.814   2
  15   5   2 18492.3 1201.27   2
  15  -5   2 17332.7 962.205   2
  15  -5   3 5197.82 573.120   2
  15   5   3 5312.60 692.894   2
  15   5   4 5176.10 664.601   2
  15   5   5 2773.34 517.232   2
  15   5   5 3242.62 473.380   1
  15   5   6 3805.45 589.398   2
  15   5   6 4576.76 577.156   1
  15   5   7 5932.27 736.969   2
  15   5   7 7620.02 763.665   1
  15   5   8 3821.81 614.940   2
  15   5   8 5221.26 676.692   1
  15   5   9 5628.75 732.461   1
  15   5  10 1111.45 432.185   1
  15   5  11 1861.24 541.938   1
 -15  -7 -12 717.402 407.337   3
 -15  -7 -11 6783.65 890.964   3
 -15  -7 -10 780.767 399.589   3
 -15  -7  -9 5705.65 785.412   3
 -15  -7  -8 134.270 283.975   3
 -15  -7  -7 11353.1 1021.80   3
 -15  -7  -6 805.061 357.445   3
 -15  -7  -5 5469.57 700.709   3
 -15  -7  -4 671.269 320.963   3
 -15  -7  -3 15394.9 1095.55   3
  15  -7  -2 972.316 234.379   2
  15  -7  -1 14455.3 762.939   2
  15  -7   0 2971.42 384.157   2
  15  -7   1 12747.0 783.247   2
  15   7   2 2275.25 563.222   2
  15   7   3 15951.8 1149.13   2
  15   7   4 753.803 380.602   2
  15   7   5 6483.69 767.308   2
  15   7   6 103.031 276.778   2
  15   7   7 9460.86 932.302   2
  15   7   8 208.507 302.516   2
  15   7   8 296.582 326.203   1
  15   7   9 5833.42 757.220   1
  15   7  10 960.383 404.832   1
  15   7  11 6248.41 846.299   1
 -15  -9 -11 1630.97 518.211   3
 -15  -9 -10 5230.47 810.229   3
 -15  -9  -9 1380.28 472.646   3
 -15  -9  -8 4394.53 720.197   3
 -15  -9  -7 1024.45 408.597   3
 -15  -9  -6 10304.4 998.947   3
 -15  -9  -5 2568.22 515.187   3
 -15  -9  -4 12925.1 1065.77   3
 -15  -9  -3 344.582 296.811   3
 -15  -9  -2 11776.1 974.522   3
 -15  -9  -1 1986.45 441.404   3
 -15  -9   0 10169.4 874.179   3
 -15  -9   1 1231.48 369.214   3
  15   9   2 15431.4 1181.22   2
 -15  -9   2 14266.1 989.985   3
 -15  -9   3 289.164 222.335   3
  15   9   3 1271.85 505.493   2
 -15  -9   4 11856.4 864.498   3
  15   9   4 9556.41 951.415   2
  15   9   5 1524.68 459.797   2
 -15  -9   5 2154.86 371.734   3
  15   9   6 8393.39 882.201   2
  15   9   7 1183.22 406.719   2
  15   9   8 3531.89 625.123   2
  15   9  10 5744.85 832.359   1
 -15 -11  -9 1288.59 506.668   3
 -15 -11  -8 4496.03 759.541   3
 -15 -11  -7 4774.50 767.287   3
 -15 -11  -6 7828.12 940.790   3
 -15 -11  -5 1701.43 480.186   3
 -15 -11  -4 7923.52 886.640   3
 -15 -11  -3 4522.25 673.751   3
 -15 -11  -2 3799.22 609.677   3
 -15 -11  -1 4085.69 624.222   3
 -15 -11   0 7670.02 800.028   3
 -15 -11   1 3633.04 582.115   3
  15  11   2 4905.35 779.056   2
 -15 -11   2 4717.86 612.793   3
  15  11   3 5054.76 752.004   2
 -15 -11   3 5295.27 635.307   3
 -15 -11   4 7658.30 721.172   3
  15  11   4 6059.03 794.489   2
  15  11   5 1536.40 476.298   2
  15  11   6 3802.19 659.094   2
  15  11   7 4175.25 684.364   2
  15  11   8 1959.53 508.677   2
 -15 -13  -7 5684.28 871.475   3
 -15 -13  -6 24.2514 319.622   3
 -15 -13  -5 8016.93 961.924   3
 -15 -13  -4 151.169 302.641   3
 -15 -13  -3 7453.53 908.544   3
 -15 -13  -2 1186.43 430.937   3
 -15 -13  -1 8047.19 895.052   3
 -15 -13   0 338.100 297.750   3
 -15 -13   1 7012.48 788.084   3
 -15 -13   2 1031.07 358.146   3
  15  13   2 1438.88 584.934   2
  15  13   3 7974.33 938.657   2
 -15 -13   3 8835.91 847.843   3
  15  13   4 289.325 395.630   2
  15  13   5 5541.74 796.487   2
  15  13   6-433.291 454.640   2
  15  13   7 3855.58 652.236   2
  15  13   8-228.366 346.827   2
 -15 -15  -5 514.989 333.002   3
 -15 -15  -4 4267.51 743.919   3
 -15 -15  -3 2900.21 643.097   3
 -15 -15  -2 4011.95 697.947   3
 -15 -15  -1 2256.37 533.141   3
 -15 -15   0 6925.04 860.962   3
 -15 -15   1 2462.82 534.933   3
  15  15   2 4923.39 787.986   2
 -15 -15   2 3362.54 589.037   3
  15  15   3 3994.95 738.222   2
  15  15   4 4346.44 736.977   2
  15  15   5 178.719 363.171   2
 -15 -17  -2 4316.22 789.811   3
 -15 -17  -1 1702.96 536.167   3
 -15 -17   0 4763.27 746.599   3
  15  17   1 4888.04 856.652   2
 -15 -17   1 1442.35 470.759   3
 -16   0 -11 179.592 284.951   3
 -16   0 -10 14106.0 1113.16   3
  16   0   0 46706.3 1740.80   2
  16   0   1 1165.08 437.860   2
  16   0   1 422.313 189.920   1
  16   0   2 8524.15 568.801   1
  16   0   2 7989.29 769.226   2
  16   0   3-47.6186 167.843   1
  16   0   3-209.842 320.349   2
  16   0   4 17978.8 938.095   1
  16   0   4 15498.3 1057.66   2
  16   0   5 39.9813 275.134   2
  16   0   5 358.421 245.896   1
  16   0   6 31781.6 1388.65   1
  16   0   6 28897.8 1506.60   2
  16   0   7 298.465 262.119   1
  16   0   8 12220.2 974.857   1
  16   0   9 224.111 299.125   1
  16   0  10 14888.6 1177.12   1
  16   0  11 383.630 385.038   1
  16   0  12 3955.01 709.730   1
 -16  -2 -11 3993.41 643.726   3
 -16  -2 -10 3812.92 635.474   3
 -16  -2  -9 12473.5 1061.37   3
  16  -2  -1 7026.64 698.628   2
  16   2  -1 5154.80 311.261   1
  16   2   0 14844.9 613.988   1
  16  -2   0 15307.0 987.259   2
  16   2   1 5556.03 721.609   2
  16   2   1 4351.35 387.482   1
  16  -2   1 4315.50 561.208   2
  16   2   2 11357.5 661.488   1
  16  -2   2 11699.8 873.037   2
  16   2   2 13054.3 995.387   2
  16   2   3 16511.7 858.806   1
  16  -2   3 17212.2 1065.98   2
  16   2   3 16278.7 1107.91   2
  16   2   4 4410.34 488.999   1
  16   2   4 3681.39 560.831   2
  16  -2   4 3916.87 547.784   2
  16   2   5 18626.0 1026.79   1
  16  -2   5 15992.5 1090.23   2
  16   2   5 17167.1 1174.90   2
  16   2   6 2320.67 430.651   1
  16   2   6 2145.69 481.104   2
  16  -2   6 2149.08 414.955   1
  16  -2   7 8856.37 797.958   1
  16   2   7 8148.29 773.906   1
  16   2   7 9005.29 896.854   2
  16   2   8 788.351 351.412   1
  16  -2   8 1669.09 401.079   1
  16  -2   9 14913.9 1114.53   1
  16   2   9 13226.4 1067.51   1
  16   2  10 4165.09 676.778   1
  16   2  11 4515.43 707.996   1
  16   2  12 1085.11 454.594   1
 -16  -4 -12 375.879 274.020   3
 -16  -4 -11 3672.85 641.236   3
 -16  -4 -10 3561.69 631.276   3
 -16  -4  -9 3135.27 604.773   3
 -16  -4  -8 3823.66 625.633   3
 -16  -4  -7 10476.4 963.259   3
  16  -4  -2 3560.87 499.223   2
  16   4  -1 19653.2 688.397   1
  16  -4  -1 20260.4 1063.69   2
  16   4   0 4470.25 385.053   1
  16  -4   0 3835.69 499.637   2
  16   4   1 22931.8 1331.22   2
  16   4   1 20931.6 864.817   1
  16  -4   1 21953.6 1114.76   2
  16   4   2 3243.28 606.846   2
  16  -4   2 2324.21 413.191   2
  16   4   2 2557.20 359.562   1
  16  -4   3 19718.2 1115.78   2
  16   4   3 21819.7 1012.21   1
  16   4   3 18737.2 1217.68   2
  16   4   4 2410.61 516.852   2
  16  -4   4 2761.36 460.571   2
  16   4   4 3021.10 446.661   1
  16   4   5 10514.7 949.063   2
  16   4   5 12045.7 855.489   1
  16   4   6 2505.44 543.716   2
  16   4   6 1584.91 365.578   1
  16   4   7 9487.92 931.418   2
  16   4   7 8691.27 815.017   1
  16   4   8 4602.13 657.841   1
  16   4   9 2496.27 534.852   1
  16   4  10 2932.61 589.956   1
  16   4  11 4715.52 763.460   1
 -16  -6 -12 4327.90 756.948   3
 -16  -6 -11 50.0082 299.012   3
 -16  -6 -10 4153.79 700.928   3
 -16  -6  -9 113.279 243.459   3
 -16  -6  -8 9282.29 965.133   3
 -16  -6  -7 2002.15 501.855   3
 -16  -6  -6 7051.16 819.702   3
 -16  -6  -5 74.9549 253.716   3
  16  -6  -4 11296.2 740.500   2
  16  -6  -3 2920.00 412.859   2
  16  -6  -2 25817.1 1102.42   2
  16  -6  -1-34.8027 229.763   2
  16  -6   0 16514.9 914.075   2
  16  -6   1 83.1844 180.548   2
  16   6   2 25484.4 1475.03   2
  16  -6   2 26217.2 1211.01   2
  16   6   3 2703.41 582.530   2
  16   6   4 12390.5 1048.55   2
  16   6   5 286.026 288.499   2
  16   6   6 8759.74 791.852   1
  16   6   6 8185.83 885.150   2
  16   6   7 1481.87 444.954   2
  16   6   7 2217.45 481.731   1
  16   6   8 6982.77 844.990   2
  16   6   8 9028.22 907.355   1
  16   6   9 534.510 302.407   1
  16   6  10 4086.15 696.971   1
  16   6  11 402.724 410.141   1
 -16  -8 -11 4882.25 817.222   3
 -16  -8 -10 2721.33 604.125   3
 -16  -8  -9 2664.06 619.137   3
 -16  -8  -8 3662.67 657.656   3
 -16  -8  -7 3900.65 678.773   3
 -16  -8  -6 5928.47 782.604   3
 -16  -8  -5 5952.86 777.008   3
 -16  -8  -4 4880.45 697.432   3
 -16  -8  -3 6793.87 777.028   3
 -16  -8  -2 7208.42 791.663   3
 -16  -8  -1 7518.37 792.484   3
 -16  -8   0 6118.42 701.930   3
  16   8   2 8807.72 941.875   2
  16   8   3 6703.99 848.321   2
  16   8   4 3700.83 642.468   2
  16   8   5 4430.25 697.113   2
 -16  -8   5 5644.62 606.631   3
  16   8   6 3276.49 618.565   2
  16   8   7 4128.17 675.664   2
  16   8   8 3082.80 614.695   2
  16   8   8 4147.14 657.202   1
  16   8   9 1352.36 437.993   1
  16   8  10 4104.68 714.539   1
 -16 -10  -9 5909.53 890.484   3
 -16 -10  -8 1415.79 479.925   3
 -16 -10  -7 8531.80 976.861   3
 -16 -10  -6 250.507 283.887   3
 -16 -10  -5 10138.5 1021.12   3
 -16 -10  -4 155.120 303.440   3
 -16 -10  -3 6309.37 779.148   3
 -16 -10  -2 1642.05 431.508   3
 -16 -10  -1 7678.72 821.582   3
 -16 -10   0 20.0909 224.991   3
 -16 -10   1 8271.66 817.832   3
 -16 -10   2 1261.48 360.466   3
  16  10   2 2245.58 611.477   2
  16  10   3 5498.54 769.775   2
 -16 -10   3 5961.65 668.384   3
  16  10   4 94.5118 335.563   2
 -16 -10   4 463.498 257.519   3
  16  10   5 6985.31 870.358   2
  16  10   6 134.074 380.059   2
  16  10   7 5876.39 783.554   2
  16  10   8 899.895 389.577   2
 -16 -12  -8 4070.33 770.209   3
 -16 -12  -7 1726.20 562.551   3
 -16 -12  -6 5609.26 848.864   3
 -16 -12  -5 4376.81 742.524   3
 -16 -12  -4 6560.06 853.250   3
 -16 -12  -3 649.476 382.322   3
 -16 -12  -2 6039.94 791.803   3
 -16 -12  -1 1241.74 411.232   3
 -16 -12   0 4789.96 690.595   3
 -16 -12   1 1647.92 425.270   3
  16  12   2 6683.35 891.098   2
 -16 -12   2 6275.29 733.383   3
 -16 -12   3 1095.48 351.268   3
  16  12   3 1144.88 514.286   2
  16  12   4 6078.39 844.882   2
  16  12   5 2992.07 611.096   2
  16  12   6 2972.26 595.501   2
  16  12   7 711.062 396.168   2
  16  12   8 2251.90 530.431   2
 -16 -14  -5 51.1836 331.546   3
 -16 -14  -4 5004.51 813.424   3
 -16 -14  -3 1820.01 561.051   3
 -16 -14  -2 5053.03 769.869   3
 -16 -14  -1 3645.57 679.463   3
 -16 -14   0 4402.44 690.545   3
 -16 -14   1 2627.00 548.447   3
 -16 -14   2 4519.88 666.962   3
  16  14   2 6134.94 891.040   2
 -16 -14   3 2148.52 481.673   3
  16  14   3 2546.11 622.337   2
  16  14   4 4498.36 745.411   2
  16  14   5-207.707 408.159   2
  16  14   6 2362.50 593.283   2
  16  14   7 149.952 321.749   2
 -16 -16  -2 1294.41 471.201   3
 -16 -16  -1 7633.58 959.909   3
 -16 -16   0 47.5084 309.047   3
  16  16   1 8852.66 1058.03   2
 -16 -16   1 6217.21 840.790   3
 -16 -16   2 1055.60 413.097   3
  16  16   2 2383.98 668.709   2
  16  16   3 3533.72 709.790   2
  16  16   4-176.035 390.817   2
 -17  -1 -11 4675.63 710.474   3
 -17  -1 -10 1758.18 473.728   3
  17  -1  -1 18899.0 1127.91   2
  17   1   0 3932.65 655.987   2
  17  -1   0 2929.41 539.612   2
  17   1   0 2400.53 268.889   1
  17   1   1 17965.4 1169.30   2
  17   1   1 17669.7 751.781   1
  17  -1   1 17233.8 1106.44   2
  17  -1   2 2306.05 465.553   2
  17   1   2 2822.86 354.984   1
  17   1   2 3542.26 583.209   2
  17  -1   3 10138.6 677.079   1
  17   1   3 9944.92 675.551   1
  17  -1   3 9327.29 840.842   2
  17   1   3 8322.80 832.808   2
  17   1   4 7786.96 649.175   1
  17  -1   4 7429.71 778.635   2
  17   1   4 5294.85 691.453   2
  17  -1   4 7364.55 628.856   1
  17   1   5 17786.8 1016.73   1
  17  -1   5 16786.7 1147.56   2
  17   1   5 16267.8 1158.94   2
  17  -1   5 17286.9 997.886   1
  17   1   6 3345.67 571.687   2
  17   1   6 4003.71 540.171   1
  17  -1   6 3758.90 602.867   2
  17  -1   6 3841.04 524.796   1
  17   1   7 8471.13 792.732   1
  17   1   7 8158.93 889.252   2
  17  -1   7 8147.15 789.615   1
  17  -1   8 3389.93 567.625   1
  17   1   8 3214.53 541.935   1
  17   1   9 8250.52 871.921   1
  17  -1   9 7776.74 833.840   1
  17  -1  10 2063.25 515.512   1
  17   1  10 2358.64 553.424   1
  17  -1  11 5954.39 804.249   1
  17   1  11 4543.49 719.261   1
 -17  -3 -11 788.153 396.084   3
 -17  -3 -10 6164.04 816.905   3
 -17  -3  -9 1015.85 384.007   3
 -17  -3  -8 9786.92 967.711   3
  17  -3  -2 18145.4 1053.42   2
  17  -3  -1 3872.83 566.203   2
  17   3   0 23160.4 811.441   1
  17  -3   0 23685.4 1231.63   2
  17   3   1 4648.77 420.019   1
  17   3   1 5680.66 753.120   2
  17  -3   1 4328.34 557.628   2
  17   3   2 16649.9 830.448   1
  17  -3   2 17531.4 1085.21   2
  17   3   2 18298.5 1219.97   2
  17  -3   3 1378.27 368.207   2
  17   3   3 966.923 395.343   2
  17   3   3 1294.14 309.574   1
  17   3   4 15595.8 924.568   1
  17  -3   4 14355.6 1030.61   2
  17   3   4 16041.7 1172.40   2
  17   3   5-115.877 333.771   2
  17   3   5 448.476 279.488   1
  17   3   6 12368.9 917.505   1
  17   3   6 11351.0 1012.71   2
  17   3   7 383.113 325.239   2
  17   3   7 573.404 287.495   1
  17   3   8 9646.75 903.588   1
  17   3   9 890.417 381.666   1
  17   3  10 6744.75 843.522   1
  17   3  11 923.974 377.499   1
 -17  -5 -12 2406.83 572.121   3
 -17  -5 -11 4015.24 711.218   3
 -17  -5 -10 127.258 292.921   3
 -17  -5  -9 7474.23 905.859   3
 -17  -5  -8 4712.31 731.734   3
 -17  -5  -7 3961.40 661.301   3
 -17  -5  -6 4087.68 652.024   3
  17  -5  -4 7384.81 684.784   2
  17  -5  -3 10008.3 771.623   2
  17  -5  -2 16826.6 982.218   2
  17  -5  -1 5646.92 588.482   2
  17  -5   0 3206.23 467.537   2
  17   5   1 7761.70 899.036   2
  17  -5   1 6170.75 631.997   2
  17   5   2 15131.7 1163.90   2
  17  -5   2 15704.9 992.326   2
  17  -5   3 9933.89 828.801   2
  17   5   3 11113.1 766.135   1
  17   5   3 9828.71 974.785   2
  17   5   4 6272.84 625.052   1
  17   5   4 6274.25 777.654   2
  17   5   5 3166.94 566.148   2
  17   5   5 4905.65 588.837   1
  17   5   6 3689.35 622.514   2
  17   5   6 5118.59 633.728   1
  17   5   7 4019.84 652.701   2
  17   5   7 4918.33 656.111   1
  17   5   8 4366.69 656.890   1
  17   5   8 3771.23 649.902   2
  17   5   9 6157.79 779.663   1
  17   5  10 519.136 342.721   1
  17   5  11 4079.66 720.042   1
 -17  -7 -11 5787.67 840.317   3
 -17  -7 -10 1017.37 432.225   3
 -17  -7  -9 5635.58 800.325   3
 -17  -7  -8 266.251 296.331   3
 -17  -7  -7 9716.26 1022.56   3
 -17  -7  -6 1490.98 440.076   3
 -17  -7  -5 7220.27 858.866   3
 -17  -7  -4 165.433 265.195   3
 -17  -7  -3 13107.0 1082.52   3
  17  -7  -1 13982.9 834.078   2
  17  -7   0 2371.82 387.526   2
  17  -7   1 15715.4 936.000   2
  17   7   2 1991.93 587.240   2
  17   7   3 13412.5 1135.94   2
  17   7   4 30.0604 334.442   2
  17   7   5 7159.17 850.822   2
  17   7   6 750.799 360.020   2
  17   7   6 1214.58 391.303   1
  17   7   7 9510.78 992.142   2
  17   7   7 11069.5 962.057   1
  17   7   8 176.599 277.133   2
  17   7   8 660.306 376.724   1
  17   7   9 5623.12 767.710   1
  17   7  10 408.044 378.614   1
 -17  -9  -9 2366.39 583.599   3
 -17  -9  -8 4871.50 801.584   3
 -17  -9  -7 1450.79 500.480   3
 -17  -9  -6 8723.12 965.906   3
 -17  -9  -5 1630.60 453.202   3
 -17  -9  -4 8303.77 916.790   3
 -17  -9  -3 562.911 339.395   3
 -17  -9  -2 11172.7 1007.97   3
 -17  -9  -1 554.762 328.840   3
 -17  -9   0 8156.48 843.133   3
 -17  -9   1 572.090 296.042   3
  17   9   2 11983.0 1109.96   2
 -17  -9   2 13894.4 1048.03   3
  17   9   3 813.726 484.481   2
 -17  -9   3 742.341 289.660   3
 -17  -9   4 9091.97 819.942   3
  17   9   4 8093.85 932.567   2
  17   9   5 921.867 388.559   2
 -17  -9   5 1688.76 381.904   3
  17   9   6 8660.82 972.323   2
  17   9   7 844.497 378.349   2
  17   9   8 3613.58 662.869   2
  17   9   8 5155.18 745.777   1
  17   9   9 1577.10 498.157   1
 -17 -11  -8 3697.17 720.111   3
 -17 -11  -7 3041.94 663.674   3
 -17 -11  -6 7104.18 940.552   3
 -17 -11  -5 1356.13 465.683   3
 -17 -11  -4 6473.15 849.483   3
 -17 -11  -3 5523.11 780.499   3
 -17 -11  -2 2692.97 570.491   3
 -17 -11  -1 4649.45 686.943   3
 -17 -11   0 9412.97 928.568   3
 -17 -11   1 3873.01 613.811   3
  17  11   2 4287.77 775.579   2
 -17 -11   2 2671.65 509.416   3
  17  11   3 5835.51 838.427   2
 -17 -11   3 5238.44 669.548   3
 -17 -11   4 5672.79 668.155   3
  17  11   4 5746.99 832.466   2
  17  11   5 1643.79 501.972   2
  17  11   6 4827.67 747.877   2
  17  11   7 2182.65 555.443   2
  17  11   8 2257.85 573.431   2
 -17 -13  -6 35.3969 336.345   3
 -17 -13  -5 6982.43 956.239   3
 -17 -13  -4 312.783 329.966   3
 -17 -13  -3 9839.66 1070.31   3
 -17 -13  -2 114.076 301.087   3
 -17 -13  -1 6304.01 828.382   3
 -17 -13   0 93.2511 265.063   3
 -17 -13   1 6458.84 809.031   3
 -17 -13   2 143.597 272.419   3
  17  13   2 1318.55 617.140   2
 -17 -13   3 9869.42 938.120   3
  17  13   3 8698.59 1030.57   2
  17  13   4 163.539 407.109   2
  17  13   5 4732.49 759.525   2
  17  13   6-427.201 504.572   2
  17  13   7 2743.10 594.281   2
  17  13   8-36.3066 297.492   2
 -17 -15  -3 3566.80 720.665   3
 -17 -15  -2 3357.06 693.003   3
 -17 -15  -1 2563.83 610.701   3
 -17 -15   0 6220.10 837.228   3
  17  15   1 5923.69 943.233   2
 -17 -15   1 1392.58 445.595   3
  17  15   2 4988.31 867.088   2
 -17 -15   2 2483.71 557.605   3
  17  15   3 2682.29 663.936   2
  17  15   4 1793.82 536.797   2
  17  15   5 754.659 412.370   2
 -17 -17   1 1013.38 452.351   3
 -18   0 -11 196.753 284.111   3
  18   0  -1 1895.63 538.266   2
  18   0   0 23913.0 1363.23   2
  18   0   1 454.004 354.603   2
  18   0   2 10878.1 658.579   1
  18   0   2 10347.6 913.040   2
  18   0   3 33.5856 184.028   1
  18   0   3 101.493 276.830   2
  18   0   4 12835.0 831.830   1
  18   0   4 11836.5 1000.46   2
  18   0   5 35.4004 268.682   2
  18   0   5 298.391 272.901   1
  18   0   6 5028.75 692.574   2
  18   0   6 5725.66 652.502   1
  18   0   7 81.6409 245.334   1
  18   0   8 4406.82 637.919   1
  18   0   9 420.372 346.310   1
  18   0  10 9873.91 996.018   1
  18   0  11 71.6278 285.101   1
 -18  -2 -11 2473.64 569.341   3
 -18  -2 -10 1477.68 442.003   3
 -18  -2  -9 3650.69 639.469   3
  18  -2  -2 4195.17 662.817   2
  18  -2  -1 8028.90 799.973   2
  18   2   0 8937.24 900.030   2
  18  -2   0 6651.64 715.519   2
  18   2   1 6326.73 783.036   2
  18   2   1 7381.03 511.450   1
  18  -2   1 7321.70 756.739   2
  18   2   2 3562.19 407.569   1
  18  -2   2 3148.20 527.744   2
  18   2   2 4550.92 683.816   2
  18   2   3 6849.48 594.951   1
  18  -2   3 5506.17 668.592   2
  18   2   3 6414.60 779.743   2
  18   2   4 6102.52 594.081   1
  18  -2   4 6018.67 703.712   2
  18   2   4 5099.16 695.234   2
  18   2   5 11142.4 839.553   1
  18  -2   5 10684.8 947.942   2
  18   2   5 10550.6 992.158   2
  18   2   6 6160.54 680.132   1
  18   2   6 6117.37 771.498   2
  18   2   7 5456.08 666.650   1
  18   2   7 4765.26 713.610   2
  18   2   8 1626.76 442.998   1
  18   2   9 4626.87 678.846   1
  18   2  10 1407.33 454.885   1
  18   2  11 2449.64 585.992   1
 -18  -4 -12-43.7973 277.337   3
 -18  -4 -11 4105.40 724.708   3
 -18  -4 -10 768.706 384.633   3
 -18  -4  -9 6291.36 838.652   3
 -18  -4  -8 3449.96 636.965   3
  18  -4  -3 15826.2 1018.95   2
  18  -4  -2 1881.64 452.253   2
  18  -4  -1 10777.0 851.682   2
  18  -4   0 290.042 264.459   2
  18   4   1 10837.3 1012.96   2
  18  -4   1 9725.54 819.135   2
  18   4   1 9648.84 620.097   1
  18  -4   2 1227.38 359.076   2
  18   4   2 1077.47 274.153   1
  18   4   2 1822.58 533.961   2
  18  -4   3 15727.3 1063.14   2
  18   4   3 14723.2 1166.79   2
  18   4   3 15965.0 910.390   1
  18   4   4 907.381 402.680   2
  18   4   4 2049.88 385.919   1
  18  -4   4 1153.90 361.101   2
  18   4   5 7459.53 702.977   1
  18   4   5 6598.23 808.352   2
  18   4   6 1005.54 447.362   2
  18   4   6 948.496 347.925   1
  18   4   7 10106.2 904.226   1
  18   4   7 8234.87 925.567   2
  18   4   8 4071.17 645.053   1
  18   4   8 3439.18 641.023   2
  18   4   9 6139.54 789.184   1
  18   4  10 445.965 339.660   1
 -18  -6 -11 383.461 325.190   3
 -18  -6 -10 6135.80 865.856   3
 -18  -6  -9 868.786 468.494   3
 -18  -6  -8 7572.86 926.588   3
 -18  -6  -7 1488.75 465.018   3
 -18  -6  -6 6096.25 804.585   3
 -18  -6  -5-186.881 300.065   3
  18  -6  -2 14926.9 924.085   2
  18  -6  -1 1940.07 379.727   2
  18  -6   0 11782.5 845.446   2
  18   6   1 4384.70 771.761   2
  18  -6   1 1887.33 382.670   2
  18   6   2 15628.9 1238.49   2
  18  -6   2 14697.5 990.910   2
  18   6   3 2902.32 640.430   2
  18   6   3 2990.02 438.579   1
  18   6   4 7621.24 699.568   1
  18   6   4 7093.43 862.491   2
  18   6   5 218.007 260.789   1
  18   6   5-153.109 394.994   2
  18   6   6 6505.76 837.571   2
  18   6   6 6664.34 725.188   1
  18   6   7 1553.31 462.348   2
  18   6   7 2030.14 477.465   1
  18   6   8 5657.04 807.798   2
  18   6   8 7686.52 851.852   1
  18   6   9 539.644 348.264   1
  18   6  10 5380.48 789.779   1
 -18  -8  -9 1692.67 499.012   3
 -18  -8  -8 3202.80 646.648   3
 -18  -8  -7 4003.05 708.681   3
 -18  -8  -6 5901.61 826.442   3
 -18  -8  -5 3305.63 631.775   3
 -18  -8  -4 7623.79 893.680   3
 -18  -8  -3 3890.08 650.081   3
 -18  -8  -2 8156.46 876.551   3
 -18  -8  -1 6837.24 803.096   3
  18   8   2 9905.06 1055.78   2
  18   8   3 5140.05 794.848   2
  18   8   4 7667.65 929.223   2
  18   8   5 2430.07 569.634   2
  18   8   6 4222.15 699.510   2
  18   8   7 3319.08 656.972   2
  18   8   7 4676.12 670.901   1
  18   8   8 2437.65 590.756   2
  18   8   8 4824.14 719.201   1
  18   8   9 719.876 423.489   1
 -18 -10  -8-28.8413 338.065   3
 -18 -10  -7 7751.15 983.450   3
 -18 -10  -6 271.200 379.518   3
 -18 -10  -5 10710.6 1099.33   3
 -18 -10  -4 134.259 281.324   3
 -18 -10  -3 6465.72 836.465   3
 -18 -10  -2 599.651 345.515   3
 -18 -10  -1 10143.7 993.703   3
 -18 -10   0 347.113 318.263   3
 -18 -10   1 11000.7 995.683   3
 -18 -10   2 937.434 380.928   3
  18  10   2 1067.63 505.014   2
 -18 -10   3 7172.52 789.172   3
  18  10   3 5867.02 848.205   2
  18  10   4 63.3225 366.634   2
 -18 -10   4 118.090 250.113   3
  18  10   5 9477.65 1047.16   2
  18  10   6-108.975 398.045   2
  18  10   7 6206.30 858.785   2
  18  10   8-180.957 368.225   2
  18  10   8 334.890 355.412   1
 -18 -12  -6 5646.24 893.906   3
 -18 -12  -5 5184.44 822.084   3
 -18 -12  -4 6061.62 869.083   3
 -18 -12  -3 71.7423 301.359   3
 -18 -12  -2 7164.02 886.429   3
 -18 -12  -1 595.146 342.908   3
 -18 -12   0 3524.80 628.926   3
 -18 -12   1 1360.69 416.018   3
  18  12   2 7225.07 991.841   2
 -18 -12   2 5762.28 742.726   3
 -18 -12   3 586.170 312.984   3
  18  12   3 741.490 490.829   2
  18  12   4 6345.34 909.652   2
  18  12   5 3378.72 695.129   2
  18  12   6 2812.35 614.408   2
  18  12   7 1200.97 435.419   2
 -18 -14  -3 1360.27 502.382   3
 -18 -14  -2 7678.63 980.994   3
 -18 -14  -1 2614.70 626.207   3
 -18 -14   0 4241.57 718.403   3
 -18 -14   1 1514.99 460.547   3
  18  14   1 3941.95 840.935   2
  18  14   2 7787.05 1033.67   2
 -18 -14   2 5985.41 798.634   3
  18  14   3 1245.31 578.780   2
  18  14   4 4104.24 761.966   2
  18  14   5 1663.20 528.704   2
  18  14   6 1394.45 493.808   2
 -18 -16   0 680.928 428.384   3
 -18 -16   1 6055.53 856.321   3
 -19  -1 -11 3544.39 666.997   3
 -19  -1 -10 1365.49 415.752   3
  19  -1  -1 13514.8 1050.80   2
  19   1   0 5476.37 757.691   2
  19  -1   0 3704.92 622.048   2
  19  -1   1 11233.3 965.067   2
  19   1   1 11484.3 1018.74   2
  19  -1   2 2635.61 517.709   2
  19   1   2 2471.47 536.054   2
  19   1   3 6871.72 587.158   1
  19  -1   3 6289.09 743.564   2
  19   1   3 6017.93 772.915   2
  19  -1   4 3083.11 565.190   2
  19   1   4 2680.09 543.424   2
  19   1   4 3576.43 475.931   1
  19   1   5 13485.0 924.354   1
  19  -1   5 13805.3 1115.50   2
  19   1   5 13179.0 1112.69   2
  19   1   6 1350.77 369.285   1
  19   1   6 1180.59 380.600   2
  19  -1   6 1216.37 399.011   2
  19  -1   6 1549.19 410.554   1
  19  -1   7 6613.09 731.851   1
  19   1   7 5754.94 688.615   1
  19   1   7 5543.52 777.614   2
  19   1   8 1933.07 450.401   1
  19  -1   8 2043.90 490.367   1
  19  -1   9 6670.91 821.338   1
  19   1   9 4452.36 673.615   1
  19   1  10 1690.94 469.800   1
 -19  -3 -11 40.2822 316.147   3
 -19  -3 -10 3805.39 704.497   3
 -19  -3  -9 292.007 369.810   3
  19  -3  -3 1630.27 475.856   2
  19  -3  -2 13708.6 1006.44   2
  19  -3  -1 1130.00 411.130   2
  19   3   0 13822.2 1157.94   2
  19  -3   0 13006.4 993.170   2
  19  -3   1 158.046 279.834   2
  19   3   1 1448.48 546.858   2
  19  -3   2 12813.1 1004.95   2
  19   3   2 12224.8 1089.73   2
  19   3   3 537.715 247.788   1
  19  -3   3 394.250 294.099   2
  19   3   3 597.181 387.003   2
  19   3   4 11555.6 826.206   1
  19  -3   4 11651.7 997.255   2
  19   3   4 9934.32 992.570   2
  19   3   5 235.760 232.618   1
  19   3   5-254.408 361.750   2
  19  -3   5-166.983 297.870   2
  19   3   6 7262.55 750.099   1
  19   3   6 6895.56 849.437   2
  19   3   7 466.778 369.119   2
  19   3   7 130.669 280.083   1
  19   3   8 7316.83 828.465   1
  19   3   9 450.005 339.637   1
  19   3  10 4187.69 688.492   1
 -19  -5 -10 2037.62 564.756   3
 -19  -5  -9 2884.13 629.562   3
 -19  -5  -8 3739.75 698.776   3
 -19  -5  -7 5954.90 835.348   3
  19  -5  -3 7545.97 724.042   2
  19  -5  -2 6392.72 674.279   2
  19  -5  -1 7226.65 707.421   2
  19  -5   0 468.046 238.979   2
  19   5   1 7167.71 914.452   2
  19  -5   1 6089.77 674.773   2
  19   5   2 5299.33 783.517   2
  19  -5   2 7156.58 732.622   2
  19  -5   3 7864.60 783.414   2
  19   5   3 7194.94 650.889   1
  19   5   3 6954.62 873.231   2
  19   5   4 2833.41 612.095   2
  19   5   4 2951.75 461.117   1
  19   5   5 4520.30 711.036   2
  19   5   5 4945.93 615.006   1
  19   5   6 1197.95 444.400   2
  19   5   6 2354.07 489.808   1
  19   5   7 5637.99 725.960   1
  19   5   7 5491.20 800.101   2
  19   5   8 2821.71 604.337   2
  19   5   8 3692.89 638.117   1
  19   5   9 4565.85 711.110   1
  19   5  10 1375.07 455.961   1
 -19  -7  -9 3670.79 713.611   3
 -19  -7  -8 70.6717 305.379   3
 -19  -7  -7 9329.55 1052.35   3
 -19  -7  -6 1449.62 457.293   3
 -19  -7  -5 3086.61 619.757   3
 -19  -7  -4 1510.26 479.528   3
  19  -7   0 310.475 215.862   2
  19   7   1 9169.88 1022.85   2
  19  -7   1 7598.31 708.109   2
  19   7   2 1425.18 564.464   2
  19   7   3 6218.33 861.252   2
  19   7   4 727.161 438.072   2
  19   7   4 1642.27 389.090   1
  19   7   5 3019.57 515.705   1
  19   7   5 2201.40 551.728   2
  19   7   6 814.123 413.347   2
  19   7   6 992.426 369.305   1
  19   7   7 7048.74 903.409   2
  19   7   7 8056.67 876.668   1
  19   7   8-91.4174 328.432   2
  19   7   8 9.95284 307.658   1
  19   7   9 4412.26 727.269   1
 -19  -9  -8 4220.07 769.484   3
 -19  -9  -7 432.384 327.889   3
 -19  -9  -6 4656.86 772.170   3
 -19  -9  -5 1721.36 521.534   3
 -19  -9  -4 5995.13 841.826   3
 -19  -9  -3 478.487 361.901   3
 -19  -9  -2 4488.40 715.600   3
 -19  -9  -1 198.904 288.179   3
 -19  -9   0 5277.92 735.191   3
 -19  -9   1 12.9320 229.625   3
  19   9   1 1146.21 585.900   2
  19   9   2 7053.08 958.692   2
 -19  -9   2 6225.21 759.756   3
  19   9   3 887.365 492.521   2
 -19  -9   3 905.320 323.578   3
 -19  -9   4 4182.85 616.333   3
  19   9   4 4150.36 767.429   2
  19   9   5 937.886 406.641   2
  19   9   6 3921.90 709.362   2
  19   9   7 183.257 299.494   1
  19   9   7 183.370 334.043   2
  19   9   8 2209.78 568.446   2
  19   9   8 2508.73 554.223   1
 -19 -11  -6 4095.52 749.259   3
 -19 -11  -5 907.401 437.101   3
 -19 -11  -4 4534.42 770.378   3
 -19 -11  -3 4192.44 723.076   3
 -19 -11  -2 2635.24 572.720   3
 -19 -11  -1 2150.48 535.613   3
 -19 -11   0 7081.32 876.979   3
 -19 -11   1 2359.72 521.528   3
  19  11   1 2696.92 719.322   2
 -19 -11   2 2504.50 530.844   3
  19  11   2 4563.58 836.798   2
 -19 -11   3 4134.55 643.349   3
  19  11   3 4054.17 771.033   2
  19  11   4 2836.07 648.658   2
  19  11   5 403.231 386.349   2
  19  11   6 3590.95 710.117   2
  19  11   7 1675.82 519.885   2
 -19 -13  -3 5357.93 827.127   3
 -19 -13  -2 135.536 292.104   3
 -19 -13  -1 6272.24 866.343   3
 -19 -13   0 443.341 361.133   3
  19  13   1 9244.03 1134.82   2
 -19 -13   1 6840.98 863.567   3
 -19 -13   2-173.505 289.575   3
  19  13   2 1597.57 624.053   2
  19  13   3 6684.10 967.751   2
  19  13   4 429.523 459.051   2
  19  13   5 3188.58 703.641   2
 -19 -15   0 5266.77 810.084   3
 -19 -15   1 990.949 412.765   3
  20   0  -1 1456.22 537.150   2
  20   0   0 18343.6 1286.98   2
  20   0   1 139.053 337.045   2
  20   0   2 5311.97 714.599   2
  20   0   3-316.817 409.092   2
  20   0   4 9538.25 739.356   1
  20   0   4 9405.01 964.377   2
  20   0   5-117.008 269.705   2
  20   0   5 94.6467 218.547   1
  20   0   6 9260.69 987.778   2
  20   0   6 10373.7 867.975   1
  20   0   7 521.662 315.610   1
  20   0   8 3255.34 555.374   1
  20   0   9-24.9552 318.742   1
  20   0  10 5864.78 823.216   1
 -20  -2 -11 2466.62 584.465   3
 -20  -2 -10 2270.30 585.251   3
 -20  -2  -9 6579.57 878.687   3
  20  -2  -2 2514.20 543.918   2
  20  -2  -1 8438.62 863.788   2
  20  -2   0 2458.52 530.126   2
  20   2   0 3658.26 694.874   2
  20  -2   1 6479.63 764.872   2
  20   2   1 8360.47 930.238   2
  20  -2   2 1252.19 393.909   2
  20   2   2 2050.30 541.520   2
  20  -2   3 8079.45 866.267   2
  20   2   3 8622.55 947.999   2
  20  -2   4 1804.10 450.650   2
  20   2   4 2324.89 541.039   2
  20   2   4 2061.17 387.891   1
  20   2   5 7081.80 701.381   1
  20  -2   5 6435.46 796.308   2
  20   2   5 6948.69 864.795   2
  20   2   6 2276.97 563.688   2
  20   2   6 3016.24 497.294   1
  20   2   7 3246.79 638.350   2
  20   2   7 3190.16 544.115   1
  20   2   8 1566.41 460.189   1
  20   2   9 5896.66 808.457   1
  20   2  10 2200.72 580.127   1
 -20  -4 -10 393.345 400.584   3
 -20  -4  -9 4111.39 755.387   3
 -20  -4  -8 1165.51 482.909   3
  20  -4  -4 3677.70 593.141   2
  20  -4  -3 9079.12 846.748   2
  20  -4  -2 3145.83 542.255   2
  20  -4  -1 4863.15 649.521   2
  20   4   0 6117.28 865.620   2
  20  -4   0 3123.71 523.228   2
  20   4   1 6572.22 889.687   2
  20  -4   1 5664.02 698.253   2
  20  -4   2 2276.73 479.041   2
  20   4   2 2795.22 626.053   2
  20  -4   3 8088.12 837.117   2
  20   4   3 7608.68 920.491   2
  20  -4   4 2387.95 509.069   2
  20   4   4 2171.32 542.122   2
  20   4   4 2830.53 453.963   1
  20   4   5 5051.32 610.850   1
  20   4   5 3299.89 663.650   2
  20   4   6 311.042 274.212   1
  20   4   6 696.832 399.441   2
  20   4   7 8108.99 845.097   1
  20   4   7 5548.97 817.597   2
  20   4   8 706.381 389.888   1
  20   4   8 47.5032 362.289   2
  20   4   9 5364.10 772.399   1
  20   4  10 503.496 365.609   1
 -20  -6  -9 632.801 380.227   3
 -20  -6  -8 5808.01 851.686   3
 -20  -6  -7 288.944 364.089   3
 -20  -6  -6 6624.08 884.989   3
 -20  -6  -5 565.377 412.740   3
  20  -6  -1-194.900 325.097   2
  20  -6   0 5679.75 643.612   2
  20  -6   1-7.69582 248.533   2
  20   6   1 1021.71 564.830   2
  20   6   2 8601.99 1003.49   2
  20  -6   2 8453.78 806.731   2
  20   6   3 451.383 458.806   2
  20   6   4 4415.21 728.866   2
  20   6   4 5721.85 637.204   1
  20   6   5-311.522 497.863   2
  20   6   5 168.885 250.503   1
  20   6   6 5108.70 785.299   2
  20   6   6 7063.81 773.802   1
  20   6   7 953.097 415.723   2
  20   6   7 801.830 361.075   1
  20   6   8 5592.97 758.311   1
  20   6   8 5595.10 862.969   2
  20   6   9 228.506 331.192   1
 -20  -8  -7 2147.59 589.499   3
 -20  -8  -6 1916.89 565.268   3
 -20  -8  -5 4644.53 779.362   3
 -20  -8  -4 2633.31 590.682   3
 -20  -8  -3 4644.10 750.338   3
 -20  -8  -2 3870.32 672.719   3
 -20  -8  -1 3609.17 634.714   3
  20   8   1 6683.30 937.975   2
  20   8   2 5202.57 850.736   2
  20   8   3 4190.13 773.562   2
  20   8   4 2080.30 612.926   2
  20   8   4 2494.90 468.096   1
  20   8   5 3452.58 559.645   1
  20   8   5 2766.95 632.200   2
  20   8   6 2606.95 523.326   1
  20   8   6 1513.31 525.374   2
  20   8   7 2214.08 570.630   2
  20   8   7 2908.48 568.929   1
  20   8   8 989.016 452.284   2
  20   8   8 1953.14 503.692   1
 -20 -10  -6 316.011 416.887   3
 -20 -10  -5 5569.25 842.664   3
 -20 -10  -4 393.909 303.846   3
 -20 -10  -3 4044.33 715.044   3
 -20 -10  -2 226.048 308.663   3
 -20 -10  -1 6818.71 872.433   3
 -20 -10   0 655.264 382.994   3
  20  10   1 6710.59 978.066   2
 -20 -10   1 6308.31 820.462   3
 -20 -10   2 159.314 283.753   3
  20  10   2 1285.42 602.268   2
  20  10   3 4688.06 837.061   2
 -20 -10   3 3886.44 621.022   3
  20  10   4 5.06142 357.016   2
 -20 -10   4-12.9959 252.044   3
  20  10   5 4919.85 826.163   2
  20  10   6-255.854 483.440   2
  20  10   7 4654.29 707.386   1
 -20 -12  -3 593.301 405.075   3
 -20 -12  -2 4136.82 734.977   3
 -20 -12  -1 1520.65 513.164   3
 -20 -12   0 3574.40 650.554   3
 -20 -12   1 1151.62 414.328   3
  20  12   1 4818.21 900.480   2
 -20 -12   2 3259.37 603.135   3
  20  12   2 4277.11 830.549   2
 -20 -12   3 912.691 362.385   3
  20  12   3 1377.73 601.650   2
  20  12   4 3172.81 704.656   2
  20  12   5 741.455 493.315   2
 -20 -14   0 5601.65 853.257   3
 -20 -14   1 678.255 406.225   3
 -20 -14   2 3441.22 657.894   3
 -21  -1 -10 718.085 393.283   3
  21  -1  -2 2267.43 562.830   2
  21  -1  -1 7658.36 871.936   2
  21   1  -1 8455.50 959.255   2
  21   1   0 4812.07 753.668   2
  21  -1   0 4401.21 697.653   2
  21  -1   1 6956.84 825.544   2
  21   1   1 7659.06 910.392   2
  21  -1   2 1568.72 444.522   2
  21   1   2 1684.18 502.034   2
  21  -1   3 3440.44 613.755   2
  21   1   3 3494.45 642.785   2
  21  -1   4 1460.37 428.207   2
  21   1   4 1912.73 507.125   2
  21  -1   5 7949.06 902.533   2
  21   1   5 8282.28 945.173   2
  21   1   5 8072.07 746.853   1
  21   1   6 519.910 385.481   2
  21  -1   6 179.696 276.182   2
  21   1   6 415.081 256.734   1
  21   1   7 4513.55 758.211   2
  21   1   7 5476.65 700.005   1
  21   1   8 473.499 371.716   1
  21   1   9 4063.01 674.153   1
 -21  -3  -9 572.271 400.384   3
  21  -3  -4 8512.35 885.277   2
  21  -3  -3 899.686 445.710   2
  21  -3  -2 6232.61 758.734   2
  21  -3  -1 306.224 335.438   2
  21   3  -1 2398.72 676.548   2
  21   3   0 4855.75 766.250   2
  21  -3   0 4723.16 668.713   2
  21  -3   1 243.042 327.292   2
  21   3   1 941.376 507.436   2
  21  -3   2 6783.56 778.846   2
  21   3   2 6945.46 901.164   2
  21  -3   3 131.819 260.411   2
  21   3   3 108.978 344.078   2
  21  -3   4 7622.04 854.616   2
  21   3   4 6921.82 899.159   2
  21   3   5 534.099 399.252   2
  21   3   5 294.478 259.171   1
  21  -3   5 391.336 359.834   2
  21   3   6 3420.43 662.449   2
  21   3   6 4855.70 638.417   1
  21   3   7 257.994 346.610   2
  21   3   7 472.488 344.892   1
  21   3   8 4738.76 687.185   1
  21   3   9 104.524 288.915   1
 -21  -5  -8 5193.53 855.473   3
 -21  -5  -7 4854.30 815.105   3
  21  -5  -2 5991.87 689.566   2
  21  -5  -1 4817.27 632.926   2
  21  -5   0 874.914 321.894   2
  21   5   0 3022.96 719.384   2
  21   5   1 4934.24 807.871   2
  21  -5   1 4542.72 629.314   2
  21  -5   2 5615.84 694.933   2
  21   5   2 6124.39 877.356   2
  21  -5   3 3230.37 550.926   2
  21   5   3 2612.41 641.113   2
  21   5   4 1632.64 554.367   2
  21   5   5 2521.17 588.480   2
  21   5   6 3360.42 677.456   2
  21   5   6 2900.26 522.115   1
  21   5   7 4217.22 640.573   1
  21   5   7 2335.32 599.477   2
  21   5   8 4607.83 804.902   2
  21   5   8 5287.29 752.011   1
  21   5   9 2547.96 573.609   1
 -21  -7  -7 6287.65 931.418   3
 -21  -7  -6 890.889 460.924   3
 -21  -7  -5 6574.80 911.083   3
 -21  -7  -4 869.659 463.675   3
  21   7   0 2895.90 737.711   2
  21   7   1 7986.03 1026.72   2
  21   7   2 1123.58 556.515   2
  21   7   3 10203.0 1115.49   2
  21   7   4 145.516 368.316   2
  21   7   5 4984.72 817.951   2
  21   7   6 227.332 394.297   2
  21   7   6 303.203 288.283   1
  21   7   7 5720.10 771.759   1
  21   7   7 5009.40 813.014   2
  21   7   8 134.664 348.723   1
 -21  -9  -5 669.220 418.466   3
 -21  -9  -4 6843.39 923.566   3
 -21  -9  -3 140.857 296.736   3
 -21  -9  -2 8008.89 973.538   3
 -21  -9  -1 2274.54 553.206   3
 -21  -9   0 7051.97 884.012   3
  21   9   1 5874.17 979.758   2
 -21  -9   1 2043.22 509.519   3
  21   9   2 7634.63 1030.67   2
 -21  -9   2 7231.64 871.254   3
  21   9   3 755.121 526.756   2
 -21  -9   3 913.210 376.297   3
 -21  -9   4 5672.72 746.484   3
  21   9   4 4594.66 803.705   2
  21   9   5-46.9730 428.902   2
  21   9   6 5880.70 902.974   2
  21   9   6 7994.44 889.875   1
  21   9   7 229.579 299.641   1
 -21 -11  -3 3037.24 666.222   3
 -21 -11  -2 4017.81 745.015   3
 -21 -11  -1 4142.85 733.087   3
 -21 -11   0 8053.34 965.951   3
  21  11   1 6686.13 1005.69   2
 -21 -11   1 3397.44 639.073   3
 -21 -11   2 4138.61 689.583   3
  21  11   2 4861.99 881.825   2
  21  11   3 2995.55 760.584   2
 -21 -11   3 2901.36 587.757   3
  21  11   4 3100.14 737.814   2
 -21 -13   0 212.340 315.173   3
 -21 -13   1 4212.78 729.211   3
 -21 -13   2 186.649 289.386   3
  22   0  -2 5703.73 845.470   2
  22   0  -1 1022.76 515.602   2
  22   0   0 11586.6 1093.29   2
  22   0   1-126.674 364.423   2
  22   0   2 4777.67 745.275   2
  22   0   3-286.939 427.620   2
  22   0   4 8603.79 961.145   2
  22   0   5 22.6353 322.045   2
  22   0   6 5877.92 847.528   2
  22  -2  -4 4205.43 720.150   2
  22  -2  -3 4919.64 762.853   2
  22  -2  -2 2687.89 596.071   2
  22   2  -1 7101.07 938.154   2
  22  -2  -1 7176.30 853.624   2
  22  -2   0 3498.90 635.640   2
  22   2   0 3749.89 719.915   2
  22  -2   1 5827.98 781.559   2
  22   2   1 7375.36 936.875   2
  22  -2   2 2224.33 500.751   2
  22   2   2 1911.87 550.895   2
  22   2   3 4020.52 697.933   2
  22  -2   3 4696.87 713.291   2
  22  -2   4 1304.48 412.218   2
  22   2   4 802.578 367.878   2
  22  -2   5 6602.31 847.756   2
  22   2   5 4958.44 776.259   2
  22   2   6 1833.75 513.170   2
  22   2   7 3106.14 648.435   2
  22   2   7 3971.37 627.289   1
  22   2   8 1573.59 442.731   1
  22   2   9 4952.00 750.228   1
  22  -4  -3 8689.04 879.899   2
  22  -4  -2 1761.26 474.574   2
  22   4  -1 7306.98 980.756   2
  22  -4  -1 5166.18 685.944   2
  22  -4   0 948.312 344.835   2
  22   4   0 2580.75 676.654   2
  22  -4   1 5735.40 716.972   2
  22   4   1 7011.83 934.285   2
  22  -4   2 1393.03 424.831   2
  22   4   2 1632.81 565.410   2
  22  -4   3 8061.51 885.140   2
  22   4   3 7185.37 959.933   2
  22   4   4 1193.55 479.033   2
  22  -4   4 1513.58 463.703   2
  22   4   5 4578.89 783.181   2
  22   4   6 280.136 352.888   2
  22   4   7 7519.24 839.528   1
  22   4   7 7275.32 966.820   2
  22   4   8 282.872 359.390   1
  22   4   9 3710.06 656.683   1
 -22  -6  -6 5373.38 859.236   3
 -22  -6  -5 649.154 421.468   3
  22   6   0 7038.11 991.064   2
  22  -6   1 165.215 241.646   2
  22   6   1 1137.77 595.570   2
  22  -6   2 7363.75 804.409   2
  22   6   2 9009.55 1075.93   2
  22   6   3 1185.25 545.964   2
  22   6   4 6443.75 950.261   2
  22   6   5-379.460 508.105   2
  22   6   6 5931.54 877.366   2
  22   6   8 4528.57 708.933   1
 -22  -8  -5 2665.75 647.732   3
 -22  -8  -4 2725.52 650.505   3
 -22  -8  -3 4009.22 747.428   3
 -22  -8  -2 5820.72 872.568   3
 -22  -8  -1 4403.46 759.986   3
  22   8   0 9847.11 1170.17   2
  22   8   1 5823.42 946.632   2
  22   8   2 6533.92 966.370   2
  22   8   3 2924.74 696.540   2
  22   8   4 3207.31 703.560   2
  22   8   5 2431.75 623.639   2
 -22 -10  -3 5615.57 877.881   3
 -22 -10  -2 846.532 403.248   3
 -22 -10  -1 6355.35 912.711   3
 -22 -10   0 469.308 360.183   3
  22  10   0 3104.92 795.588   2
  22  10   1 7730.95 1077.69   2
 -22 -10   1 8624.72 996.760   3
 -22 -10   2 444.168 373.465   3
  22  10   2 1237.52 603.872   2
 -22 -10   3 4997.17 742.711   3
  22  10   3 4765.46 893.828   2
 -22 -12   0 3240.49 679.860   3
 -22 -12   1 718.536 398.873   3
 -22 -12   2 4070.42 708.199   3
  23  -1  -3 7037.78 915.438   2
  23  -1  -2 3142.05 669.463   2
  23   1  -2 3561.30 747.037   2
  23   1  -1 9595.13 1068.31   2
  23  -1  -1 8222.54 946.751   2
  23  -1   0 1924.84 544.155   2
  23   1   0 2791.63 654.654   2
  23  -1   1 8139.92 931.061   2
  23   1   1 9398.98 1019.16   2
  23  -1   2 1422.93 482.213   2
  23   1   2 1352.88 495.649   2
  23  -1   3 4509.44 740.716   2
  23   1   3 3439.98 674.366   2
  23  -1   4 2588.83 589.979   2
  23   1   4 2769.73 645.515   2
  23  -1   5 7480.42 936.294   2
  23   1   5 7342.88 944.899   2
  23   1   6 1188.22 466.798   2
  23  -1   6 1036.30 443.957   2
  23  -3  -4 7555.02 892.034   2
  23  -3  -3 769.882 411.448   2
  23  -3  -2 8140.36 902.663   2
  23  -3  -1 28.8600 347.852   2
  23   3  -1 2723.69 732.407   2
  23   3   0 10663.8 1135.58   2
  23  -3   0 9745.59 979.055   2
  23  -3   1-335.518 410.291   2
  23   3   1 400.098 418.961   2
  23  -3   2 8792.63 944.005   2
  23   3   2 8650.58 1042.32   2
  23  -3   3 530.040 349.070   2
  23   3   3 749.017 468.612   2
  23  -3   4 8240.02 936.203   2
  23   3   4 6708.23 931.129   2
  23   3   5 600.057 430.173   2
  23   3   6 6449.25 913.907   2
  23   5  -1 6073.43 952.620   2
  23  -5   0 1512.91 416.348   2
  23   5   0 1956.88 666.003   2
  23   5   1 3664.76 780.710   2
  23  -5   1 4300.96 623.272   2
  23   5   2 5804.81 920.577   2
  23  -5   2 4346.06 650.319   2
  23   5   3 5329.75 859.621   2
  23  -5   3 6779.14 834.487   2
  23   5   4 2375.95 625.882   2
  23   5   5 3562.33 729.437   2
 -23  -7  -4 954.886 461.172   3
  23   7   0 3021.29 810.225   2
  23   7   1 7693.96 1054.42   2
  23   7   2 749.368 538.103   2
  23   7   3 7338.92 1004.34   2
  23   7   4-548.077 599.104   2
 -23  -9  -2 4118.53 755.752   3
 -23  -9  -1 2056.45 554.766   3
  23   9   0 9841.29 1228.99   2
 -23  -9   0 6434.71 906.024   3
 -23  -9   1 1488.10 492.821   3
  23   9   1 2006.11 722.110   2
 -23  -9   2 3872.40 688.560   3
 -23  -9   3 326.180 321.453   3
 -23 -11   1 1331.42 474.608   3
 -23 -11   2 3283.72 658.843   3
  24   0  -3 1212.63 597.534   2
  24   0  -2 7114.42 950.932   2
  24   0  -1 233.255 453.462   2
  24   0   0 13115.7 1229.46   2
  24   0   1 129.722 358.223   2
  24   0   2 5465.07 837.943   2
  24   0   3-268.471 368.165   2
  24   0   4 5370.51 813.519   2
  24   0   5-432.600 412.148   2
  24   0   6 1672.40 530.381   2
  24  -2  -4 4327.29 748.285   2
  24  -2  -3 3372.80 679.099   2
  24  -2  -2 1843.70 558.892   2
  24   2  -2 2877.76 766.325   2
  24   2  -1 6514.82 961.438   2
  24  -2  -1 5136.55 764.552   2
  24  -2   0 2030.71 547.648   2
  24   2   0 3019.12 690.332   2
  24  -2   1 3860.31 683.038   2
  24   2   1 4002.92 771.926   2
  24  -2   2 1109.22 433.664   2
  24   2   2 668.500 414.822   2
  24  -2   3 3031.95 625.409   2
  24   2   3 3669.59 725.783   2
  24  -2   4 2273.40 545.450   2
  24   2   4 3135.75 660.759   2
  24  -2   5 4470.43 771.880   2
  24   2   5 4778.81 805.946   2
  24   4  -2 4699.96 896.100   2
  24  -4  -1 2278.31 520.096   2
  24   4  -1 4092.72 847.488   2
  24  -4   0-421.125 475.241   2
  24   4   0 1104.72 609.205   2
  24  -4   1 2451.84 541.878   2
  24   4   1 1767.79 637.282   2
  24  -4   2 48.3287 282.235   2
  24   4   2 174.274 463.416   2
  24   4   3 6493.00 955.680   2
  24  -4   3 7569.02 900.464   2
  24   4   4 47.3427 376.195   2
  24  -4   4 1171.77 436.070   2
  24   6  -1 2283.90 695.056   2
  24   6   0 7237.10 1077.20   2
  24   6   1 911.725 544.828   2
  24   6   2 6023.66 956.626   2
  24  -6   2 5983.16 755.711   2
  24   6   3 164.067 480.833   2
 -24  -8  -1 2611.06 632.063   3
 -24  -8   0 4667.15 809.740   3
 -24 -10   3 3666.76 691.300   3
  25  -1  -5 4734.21 822.010   2
  25  -1  -4 2652.08 693.794   2
  25   1  -4 3277.73 818.427   2
  25   1  -3 4859.19 889.251   2
  25  -1  -3 3505.33 735.452   2
  25  -1  -2 1061.20 511.299   2
  25   1  -2 1775.15 637.978   2
  25  -1  -1 4474.65 762.684   2
  25   1  -1 5629.08 905.504   2
  25  -1   0 2872.29 659.704   2
  25   1   0 2110.09 594.087   2
  25  -1   1 3756.38 699.742   2
  25   1   1 4637.53 813.379   2
  25  -1   2 187.107 421.858   2
  25   1   2 315.303 373.999   2
  25  -1   3 2465.65 584.038   2
  25   1   3 1990.40 577.145   2
  25  -1   4 938.437 473.723   2
  25   1   4 1343.42 501.968   2
  25   3  -3 2922.28 787.114   2
  25   3  -2 7665.31 1060.56   2
  25  -3  -2 4856.07 749.321   2
  25  -3  -1 124.917 352.851   2
  25   3  -1 1653.97 653.106   2
  25  -3   0 3950.18 686.939   2
  25   3   0 4618.85 843.530   2
  25  -3   1 1015.20 433.232   2
  25   3   1 501.580 503.902   2
  25  -3   2 4730.52 741.544   2
  25   3   2 4853.91 840.886   2
  25  -3   3 203.511 331.123   2
  25   3   3 693.422 484.180   2
  25  -3   4 4652.88 760.755   2
  25   5  -2 6236.78 1013.63   2
  25   5  -1 3949.24 848.677   2
  25   5   0 859.396 543.037   2
  25   5   1 1939.84 666.922   2
  25  -5   2 2992.03 591.561   2
  25  -5   3 1193.65 398.297   2
  26   0  -5 2177.76 688.050   2
  26   0  -4 6525.67 966.885   2
  26   0  -3 579.744 537.343   2
  26   0  -2 4237.92 803.801   2
  26   0  -1-209.407 415.110   2
  26   0   0 6288.24 911.300   2
  26   0   1-516.543 546.990   2
  26   0   2 2713.64 643.209   2
  26   2  -3 4918.25 915.462   2
  26  -2  -2 2714.38 618.637   2
  26   2  -2 3260.63 794.694   2
  26  -2  -1 2725.74 613.623   2
  26   2  -1 3911.43 829.375   2
  26  -2   0 1698.53 511.374   2
  26   2   0 2935.94 698.673   2
  26  -2   1 2360.90 606.963   2
  26   2   1 3215.14 726.717   2
  26  -2   2 1504.78 507.861   2
  26  -2   3 2014.02 537.725   2
  26  -4   1 3963.72 706.517   2
  26  -4   2 593.825 373.471   2
  26  -4   3 3164.29 631.756   2
  27  -1  -3 1574.80 575.810   2
  27  -1  -2 1677.80 598.409   2
  27  -1  -1 2290.48 620.769   2
  27  -1   0 422.917 412.839   2
  27  -3   0 4313.51 727.951   2
  27  -3   1 222.196 293.901   2
   0   0   0    0.00    0.00   0
TITL Ko836_100 in Cmc2(1)
REM Cmc2(1) (#36, found as Ccm2(1) in ba-c setting)
CELL 0.71073  18.729042  14.870185  11.191754  90.0000  90.0000  90.0000
ZERR    5.00   0.000510   0.000425   0.000375   0.0000   0.0000   0.0000
LATT -7
SYMM -x,-y, z+1/2
SYMM  x,-y, z+1/2
SYMM -x, y, z
SFAC C H N O Cl Er
UNIT 75.00 60.00 50.00 20.00 15.00 5.00
TREF
HKLF 4
END
;
_shelx_hkl_checksum   90845
