# Supplementary material for: A Series of Novel Pentagonal-Bipyramidal Erbium(III) Complexes with Acyclic Chelating N3O2 Schiff-Base Ligands: Synthesis, Structure, and Magnetism
Source: Molecules. 2021 Nov 16;26(22):6908. doi: 10.3390/molecules26226908 (PMC8622354; doi:10.3390/molecules26226908)
Supplement: Supplementary file 1 [file molecules-26-06908-s001.zip › Supplementary files/6.cif]

 
data_6
 # start Validation Reply Form
_vrf_PLAT214_410_global
;
PROBLEM: Short Intra H...H Contact  H2C1     ..H2C1     .       1.61 Ang.  
PROBLEM: Atom C2C       (Anion/Solvent) ADP max/min Ratio        5.6 prolat
RESPONSE: the C2C atom in the Et3NH+ counter cation which is at the crystallographically special position bears large thermal disorder.
Upon refinement with riding H atoms on C2C results in short intra H...H contacts 
;
# end Validation Reply Form

_audit_creation_method            'SHELXL-2018/3'
_shelx_SHELXL_version_number      '2018/3'
_chemical_name_systematic         ?
_chemical_name_common             ?
_chemical_melting_point           ?
_chemical_formula_moiety          
 'C23 H19 Cl2 Er0.045 N5 O4 Y0.955, C6 H16 N' 
_chemical_formula_sum
 'C29 H35 Cl2 Er0.045 N6 O4 Y0.955' 
_chemical_formula_weight          694.97

loop_
 _atom_type_symbol
 _atom_type_description
 _atom_type_scat_dispersion_real
 _atom_type_scat_dispersion_imag
 _atom_type_scat_source
 'C'  'C'   0.0033   0.0016
 'International Tables Vol C Tables 4.2.6.8 and 6.1.1.4'
 'H'  'H'   0.0000   0.0000
 'International Tables Vol C Tables 4.2.6.8 and 6.1.1.4'
 'N'  'N'   0.0061   0.0033
 'International Tables Vol C Tables 4.2.6.8 and 6.1.1.4'
 'O'  'O'   0.0106   0.0060
 'International Tables Vol C Tables 4.2.6.8 and 6.1.1.4'
 'Cl'  'Cl'   0.1484   0.1585
 'International Tables Vol C Tables 4.2.6.8 and 6.1.1.4'
 'Er'  'Er'  -0.2586   4.9576
 'International Tables Vol C Tables 4.2.6.8 and 6.1.1.4'
 'Y'  'Y'  -2.7962   3.5667
 'International Tables Vol C Tables 4.2.6.8 and 6.1.1.4'
 
_space_group_crystal_system       orthorhombic
_space_group_IT_number            36
_space_group_name_H-M_alt         'C m c 21'
_space_group_name_Hall            'C 2c -2'
 
_shelx_space_group_comment
;
The symmetry employed for this shelxl refinement is uniquely defined
by the following loop, which should always be used as a source of
symmetry information in preference to the above space-group names.
They are only intended as comments.
;
 
loop_
 _space_group_symop_operation_xyz
 'x, y, z'
 '-x, -y, z+1/2'
 'x, -y, z+1/2'
 '-x, y, z'
 'x+1/2, y+1/2, z'
 '-x+1/2, -y+1/2, z+1/2'
 'x+1/2, -y+1/2, z+1/2'
 '-x+1/2, y+1/2, z'
 
_cell_length_a                    18.7925(12)
_cell_length_b                    14.9064(8)
_cell_length_c                    11.1790(7)
_cell_angle_alpha                 90
_cell_angle_beta                  90
_cell_angle_gamma                 90
_cell_volume                      3131.6(3)
_cell_formula_units_Z             4
_cell_measurement_temperature   150.0(1) 
_cell_measurement_reflns_used   1864
_cell_measurement_theta_min     2.8261
_cell_measurement_theta_max     29.1927
 
_exptl_crystal_description       'rectangular blocks'
_exptl_crystal_colour            'yellow'
_exptl_crystal_density_meas       ?
_exptl_crystal_density_method     ?
_exptl_crystal_density_diffrn     1.474         
_exptl_crystal_F_000              1429
_exptl_transmission_factor_min    ?
_exptl_transmission_factor_max    ?
_exptl_crystal_size_max           0.3
_exptl_crystal_size_mid           0.1 
_exptl_crystal_size_min           0.1
_exptl_absorpt_coefficient_mu     2.117
_shelx_estimated_absorpt_T_min    ?
_shelx_estimated_absorpt_T_max    ?
_exptl_absorpt_correction_T_min                   0.72678
_exptl_absorpt_correction_T_max                   1.00000
_exptl_absorpt_correction_type            'multi-scan'
_exptl_absorpt_process_details
;
CrysAlisPro, Agilent Technologies,
Version 1.171.36.20 (release 27-06-2012 CrysAlis171 .NET)
(compiled Jul 11 2012,15:38:31)
Empirical absorption correction using spherical harmonics,
 implemented in SCALE3 ABSPACK scaling algorithm.
;
_diffrn_ambient_temperature       150.0(1)
_diffrn_radiation_wavelength      0.71073
_diffrn_radiation_type            MoK\a
_diffrn_radiation_source 'Enhance (Mo) X-ray Source'
_diffrn_radiation_monochromator 'graphite'
_diffrn_measurement_device_type 'Xcalibur, Eos'
_diffrn_detector_area_resol_mean 16.2060
_diffrn_measurement_method '\w scans'
_diffrn_reflns_number             4307
_diffrn_reflns_av_unetI/netI      0.0456
_diffrn_reflns_av_R_equivalents   0.0276
_diffrn_reflns_limit_h_min        -22
_diffrn_reflns_limit_h_max        23
_diffrn_reflns_limit_k_min        -10
_diffrn_reflns_limit_k_max        18
_diffrn_reflns_limit_l_min        -10
_diffrn_reflns_limit_l_max        13
_diffrn_reflns_theta_min          3.285
_diffrn_reflns_theta_max          26.309
_diffrn_reflns_theta_full         25.242
_diffrn_measured_fraction_theta_max   0.997
_diffrn_measured_fraction_theta_full  0.996
_diffrn_reflns_Laue_measured_fraction_max    0.997
_diffrn_reflns_Laue_measured_fraction_full   0.996
_diffrn_reflns_point_group_measured_fraction_max   0.754
_diffrn_reflns_point_group_measured_fraction_full  0.762
_reflns_number_total              2472
_reflns_number_gt                 2307
_reflns_threshold_expression      'I > 2\s(I)'
_reflns_Friedel_coverage          0.436
_reflns_Friedel_fraction_max      0.484
_reflns_Friedel_fraction_full     0.499
 
_reflns_special_details
;
 Reflections were merged by SHELXL according to the crystal
 class for the calculation of statistics and refinement.
 
 _reflns_Friedel_fraction is defined as the number of unique
 Friedel pairs measured divided by the number that would be
 possible theoretically, ignoring centric projections and
 systematic absences.
;
 
_computing_data_collection        ?
_computing_cell_refinement        ?
_computing_data_reduction         ?
_computing_structure_solution     ?
_computing_structure_refinement 'SHELXL-2018/3 (Sheldrick, 2018)'
_computing_molecular_graphics     ?
_computing_publication_material   ?
_refine_special_details           ?
_refine_ls_structure_factor_coef  Fsqd
_refine_ls_matrix_type            full
_refine_ls_weighting_scheme       calc
_refine_ls_weighting_details
'w=1/[\s^2^(Fo^2^)+(0.0275P)^2^+3.5973P] where P=(Fo^2^+2Fc^2^)/3'
_atom_sites_solution_primary      'direct methods'
_atom_sites_solution_secondary    'diff Fourier map'
_atom_sites_solution_hydrogens    mixed
_refine_ls_hydrogen_treatment     mixed
_refine_ls_extinction_method      none
_refine_ls_extinction_coef        .
_refine_ls_abs_structure_details
;
 Flack x determined using 650 quotients [(I+)-(I-)]/[(I+)+(I-)]
 (Parsons, Flack and Wagner, Acta Cryst. B69 (2013) 249-259).
;
_refine_ls_abs_structure_Flack    -0.018(5)
_chemical_absolute_configuration  ?
_refine_ls_number_reflns          2472
_refine_ls_number_parameters      212
_refine_ls_number_restraints      1
_refine_ls_R_factor_all           0.0387
_refine_ls_R_factor_gt            0.0343
_refine_ls_wR_factor_ref          0.0730
_refine_ls_wR_factor_gt           0.0710
_refine_ls_goodness_of_fit_ref    1.059
_refine_ls_restrained_S_all       1.059
_refine_ls_shift/su_max           0.000
_refine_ls_shift/su_mean          0.000
 
loop_
 _atom_site_label
 _atom_site_type_symbol
 _atom_site_fract_x
 _atom_site_fract_y
 _atom_site_fract_z
 _atom_site_U_iso_or_equiv
 _atom_site_adp_type
 _atom_site_occupancy
 _atom_site_site_symmetry_order  
 _atom_site_calc_flag
 _atom_site_refinement_flags_posn
 _atom_site_refinement_flags_adp
 _atom_site_refinement_flags_occupancy
 _atom_site_disorder_assembly
 _atom_site_disorder_group
Y1 Y -1.000000 -0.32790(3) -0.08052(5) 0.01572(14) Uani 0.955 2 d S T P . .
Er1 Er -1.000000 -0.32790(3) -0.08052(5) 0.01572(14) Uani 0.045 2 d S T P . .
Cl2 Cl -1.000000 -0.21852(11) 0.10756(16) 0.0270(4) Uani 1 2 d S T P . .
Cl1 Cl -1.000000 -0.39891(12) -0.29285(16) 0.0284(4) Uani 1 2 d S T P . .
N2 N -1.000000 -0.1859(3) -0.1868(5) 0.0206(13) Uani 1 2 d S T P . .
O5 O -0.90968(17) -0.4135(2) -0.0123(3) 0.0228(8) Uani 1 1 d . . . . .
N3 N -0.82368(19) -0.3205(2) -0.0958(4) 0.0224(10) Uani 1 1 d . . . . .
N1 N -0.8821(2) -0.2689(2) -0.1255(4) 0.0215(9) Uani 1 1 d . . . . .
O3 O -0.69266(16) -0.3715(2) -0.0921(4) 0.0379(10) Uani 1 1 d . . . . .
H3 H -0.726533 -0.338675 -0.106988 0.057 Uiso 1 1 calc R U . . .
C3 C -0.7878(3) -0.4567(3) 0.0024(4) 0.0223(11) Uani 1 1 d . . . . .
C8 C -0.7154(3) -0.4434(3) -0.0290(5) 0.0267(11) Uani 1 1 d . . . . .
C013 C -0.9382(3) -0.1432(3) -0.2095(5) 0.0236(11) Uani 1 1 d . . . . .
C2 C -0.8447(2) -0.3935(3) -0.0366(4) 0.0210(11) Uani 1 1 d . . . . .
C16 C -0.8720(3) -0.1954(3) -0.1844(5) 0.0244(11) Uani 1 1 d . . . . .
C19 C -0.9364(3) -0.0559(3) -0.2545(5) 0.0324(13) Uani 1 1 d . . . . .
H19 H -0.893286 -0.027559 -0.269792 0.039 Uiso 1 1 calc R U . . .
C4 C -0.8062(3) -0.5309(3) 0.0710(5) 0.0270(11) Uani 1 1 d . . . . .
H4 H -0.853386 -0.539275 0.093510 0.032 Uiso 1 1 calc R U . . .
C5 C -0.7555(3) -0.5921(3) 0.1060(5) 0.0353(13) Uani 1 1 d . . . . .
H5 H -0.768481 -0.641500 0.151918 0.042 Uiso 1 1 calc R U . . .
C7 C -0.6656(3) -0.5064(4) 0.0065(5) 0.0356(14) Uani 1 1 d . . . . .
H7 H -0.618193 -0.498894 -0.014890 0.043 Uiso 1 1 calc R U . . .
C6 C -0.6855(3) -0.5804(4) 0.0732(5) 0.0361(14) Uani 1 1 d . . . . .
H6 H -0.651431 -0.622325 0.095946 0.043 Uiso 1 1 calc R U . . .
N1C N -1.000000 -0.3134(4) 0.3655(6) 0.0225(13) Uani 1 2 d S T P . .
C15 C -0.8012(3) -0.1621(3) -0.2260(5) 0.0354(14) Uani 1 1 d . . . . .
H15A H -0.807229 -0.106274 -0.267639 0.053 Uiso 1 1 calc R U . . .
H15B H -0.770634 -0.153072 -0.158155 0.053 Uiso 1 1 calc R U . . .
H15C H -0.780150 -0.205397 -0.278743 0.053 Uiso 1 1 calc R U . . .
C20 C -1.000000 -0.0126(5) -0.2757(7) 0.037(2) Uani 1 2 d S T P . .
H20 H -1.000000 0.045903 -0.304470 0.045 Uiso 1 2 calc R U P . .
C1C C -1.1151(4) -0.3803(5) 0.2981(7) 0.058(2) Uani 1 1 d . . . . .
H1C1 H -1.148568 -0.422460 0.330579 0.088 Uiso 1 1 calc R U . . .
H1C2 H -1.138373 -0.323899 0.284757 0.088 Uiso 1 1 calc R U . . .
H1C3 H -1.096847 -0.402794 0.223722 0.088 Uiso 1 1 calc R U . . .
C4C C -0.9853(15) -0.1623(7) 0.4574(13) 0.066(9) Uani 0.5 1 d . . P A -1
H4C1 H -1.005469 -0.121205 0.514142 0.099 Uiso 0.5 1 calc R U P A -1
H4C2 H -0.937546 -0.176974 0.481007 0.099 Uiso 0.5 1 calc R U P A -1
H4C3 H -0.984580 -0.134981 0.379625 0.099 Uiso 0.5 1 calc R U P A -1
C3C C -1.0289(5) -0.2454(7) 0.4534(10) 0.036(3) Uani 0.5 1 d . . P A -1
H3C1 H -1.077289 -0.230084 0.431097 0.043 Uiso 0.5 1 calc R U P A -1
H3C2 H -1.030241 -0.272091 0.532511 0.043 Uiso 0.5 1 calc R U P A -1
C2C C -1.0613(5) -0.3690(9) 0.3754(11) 0.182(8) Uani 1 1 d . . . . .
H2C1 H -1.042824 -0.428809 0.389438 0.218 Uiso 1 1 calc R U . . .
H2C2 H -1.083820 -0.350920 0.449693 0.218 Uiso 1 1 calc R U . . .
H1N H -1.000000 -0.288(4) 0.295(6) 0.001(15) Uiso 1 2 d S . P . .
 
loop_
 _atom_site_aniso_label
 _atom_site_aniso_U_11
 _atom_site_aniso_U_22
 _atom_site_aniso_U_33
 _atom_site_aniso_U_23
 _atom_site_aniso_U_13
 _atom_site_aniso_U_12
Y1 0.0153(3) 0.0146(2) 0.0172(3) 0.0018(3) 0.000 0.000
Er1 0.0153(3) 0.0146(2) 0.0172(3) 0.0018(3) 0.000 0.000
Cl2 0.0398(10) 0.0195(8) 0.0215(9) -0.0007(7) 0.000 0.000
Cl1 0.0398(11) 0.0253(9) 0.0203(10) -0.0007(7) 0.000 0.000
N2 0.028(3) 0.015(3) 0.018(3) 0.000(2) 0.000 0.000
O5 0.0170(17) 0.0242(17) 0.027(2) 0.0044(15) 0.0010(14) -0.0007(14)
N3 0.0182(18) 0.0238(18) 0.025(3) 0.001(2) 0.0003(19) -0.0001(15)
N1 0.019(2) 0.024(2) 0.022(2) 0.0003(17) 0.0003(18) -0.0008(17)
O3 0.0188(17) 0.052(2) 0.043(3) 0.005(3) 0.001(2) 0.0009(15)
C3 0.021(3) 0.027(3) 0.018(3) -0.006(2) -0.006(2) 0.002(2)
C8 0.022(3) 0.038(3) 0.021(3) -0.007(2) -0.001(2) 0.002(2)
C013 0.031(3) 0.022(2) 0.018(3) 0.003(2) 0.002(2) -0.005(2)
C2 0.017(2) 0.024(2) 0.023(3) -0.005(2) -0.0011(19) 0.000(2)
C16 0.027(3) 0.022(2) 0.023(3) 0.000(2) 0.002(2) -0.005(2)
C19 0.046(4) 0.023(2) 0.028(3) 0.006(2) 0.004(3) -0.010(3)
C4 0.023(3) 0.030(3) 0.028(3) -0.002(2) -0.005(2) 0.002(2)
C5 0.037(3) 0.033(3) 0.036(3) 0.003(3) -0.010(3) 0.004(2)
C7 0.020(3) 0.054(3) 0.033(3) -0.012(3) -0.003(2) 0.005(3)
C6 0.036(3) 0.041(3) 0.031(3) -0.004(3) -0.008(3) 0.019(3)
N1C 0.024(3) 0.022(3) 0.021(3) 0.004(3) 0.000 0.000
C15 0.036(3) 0.026(3) 0.044(4) 0.007(3) 0.013(3) -0.009(2)
C20 0.061(6) 0.021(4) 0.031(5) 0.008(4) 0.000 0.000
C1C 0.047(4) 0.085(5) 0.043(4) 0.007(4) -0.004(4) -0.028(4)
C4C 0.07(3) 0.042(6) 0.081(11) -0.031(6) 0.011(9) -0.004(7)
C3C 0.035(6) 0.036(6) 0.036(8) 0.004(5) 0.007(5) 0.009(4)
C2C 0.103(7) 0.259(13) 0.183(14) 0.176(12) -0.105(8) -0.146(9)
 
_geom_special_details
;
 All esds (except the esd in the dihedral angle between two l.s. planes)
 are estimated using the full covariance matrix.  The cell esds are taken
 into account individually in the estimation of esds in distances, angles
 and torsion angles; correlations between esds in cell parameters are only
 used when they are defined by crystal symmetry.  An approximate (isotropic)
 treatment of cell esds is used for estimating esds involving l.s. planes.
;
 
loop_
 _geom_bond_atom_site_label_1
 _geom_bond_atom_site_label_2
 _geom_bond_distance
 _geom_bond_site_symmetry_2
 _geom_bond_publ_flag
Y1 O5 2.256(3) . ?
Y1 O5 2.256(3) 4_355 ?
Y1 N2 2.428(5) . ?
Y1 N1 2.436(4) 4_355 ?
Y1 N1 2.436(4) . ?
Y1 Cl1 2.5990(19) . ?
Y1 Cl2 2.6607(18) . ?
N2 C013 1.349(5) 4_355 ?
N2 C013 1.349(5) . ?
O5 C2 1.286(5) . ?
N3 C2 1.334(6) . ?
N3 N1 1.381(5) . ?
N1 C16 1.291(6) . ?
O3 C8 1.353(6) . ?
O3 H3 0.8200 . ?
C3 C4 1.389(7) . ?
C3 C8 1.419(7) . ?
C3 C2 1.489(6) . ?
C8 C7 1.383(7) . ?
C013 C19 1.395(7) . ?
C013 C16 1.494(7) . ?
C16 C15 1.495(7) . ?
C19 C20 1.379(6) . ?
C19 H19 0.9300 . ?
C4 C5 1.377(7) . ?
C4 H4 0.9300 . ?
C5 C6 1.377(7) . ?
C5 H5 0.9300 . ?
C7 C6 1.382(8) . ?
C7 H7 0.9300 . ?
C6 H6 0.9300 . ?
N1C C2C 1.424(7) 4_355 ?
N1C C2C 1.424(7) . ?
N1C C3C 1.512(11) . ?
N1C H1N 0.88(7) . ?
C15 H15A 0.9600 . ?
C15 H15B 0.9600 . ?
C15 H15C 0.9600 . ?
C20 H20 0.9300 . ?
C1C C2C 1.340(10) . ?
C1C H1C1 0.9600 . ?
C1C H1C2 0.9600 . ?
C1C H1C3 0.9600 . ?
C4C C3C 1.49(2) . ?
C4C H4C1 0.9600 . ?
C4C H4C2 0.9600 . ?
C4C H4C3 0.9600 . ?
C3C H3C1 0.9700 . ?
C3C H3C2 0.9700 . ?
C2C H2C1 0.9700 . ?
C2C H2C2 0.9700 . ?
 
loop_
 _geom_angle_atom_site_label_1
 _geom_angle_atom_site_label_2
 _geom_angle_atom_site_label_3
 _geom_angle
 _geom_angle_site_symmetry_1
 _geom_angle_site_symmetry_3
 _geom_angle_publ_flag
O5 Y1 O5 97.59(16) . 4_355 ?
O5 Y1 N2 131.19(8) . . ?
O5 Y1 N2 131.19(8) 4_355 . ?
O5 Y1 N1 163.37(12) . 4_355 ?
O5 Y1 N1 65.79(12) 4_355 4_355 ?
N2 Y1 N1 65.41(9) . 4_355 ?
O5 Y1 N1 65.79(12) . . ?
O5 Y1 N1 163.37(12) 4_355 . ?
N2 Y1 N1 65.41(9) . . ?
N1 Y1 N1 130.82(18) 4_355 . ?
O5 Y1 Cl1 94.49(9) . . ?
O5 Y1 Cl1 94.49(9) 4_355 . ?
N2 Y1 Cl1 84.74(14) . . ?
N1 Y1 Cl1 87.63(10) 4_355 . ?
N1 Y1 Cl1 87.63(10) . . ?
O5 Y1 Cl2 94.57(9) . . ?
O5 Y1 Cl2 94.57(9) 4_355 . ?
N2 Y1 Cl2 81.50(14) . . ?
N1 Y1 Cl2 86.66(10) 4_355 . ?
N1 Y1 Cl2 86.66(10) . . ?
Cl1 Y1 Cl2 166.24(5) . . ?
C013 N2 C013 118.9(6) 4_355 . ?
C013 N2 Y1 120.3(3) 4_355 . ?
C013 N2 Y1 120.3(3) . . ?
C2 O5 Y1 120.8(3) . . ?
C2 N3 N1 109.8(4) . . ?
C16 N1 N3 118.5(4) . . ?
C16 N1 Y1 123.0(3) . . ?
N3 N1 Y1 118.2(3) . . ?
C8 O3 H3 109.5 . . ?
C4 C3 C8 119.0(4) . . ?
C4 C3 C2 119.1(4) . . ?
C8 C3 C2 121.8(4) . . ?
O3 C8 C7 118.2(5) . . ?
O3 C8 C3 122.9(4) . . ?
C7 C8 C3 118.9(5) . . ?
N2 C013 C19 121.9(5) . . ?
N2 C013 C16 115.8(4) . . ?
C19 C013 C16 122.3(4) . . ?
O5 C2 N3 125.1(4) . . ?
O5 C2 C3 118.2(4) . . ?
N3 C2 C3 116.7(4) . . ?
N1 C16 C013 114.5(4) . . ?
N1 C16 C15 124.9(5) . . ?
C013 C16 C15 120.6(4) . . ?
C20 C19 C013 118.5(5) . . ?
C20 C19 H19 120.7 . . ?
C013 C19 H19 120.7 . . ?
C5 C4 C3 120.8(5) . . ?
C5 C4 H4 119.6 . . ?
C3 C4 H4 119.6 . . ?
C6 C5 C4 120.1(5) . . ?
C6 C5 H5 120.0 . . ?
C4 C5 H5 120.0 . . ?
C6 C7 C8 120.9(5) . . ?
C6 C7 H7 119.6 . . ?
C8 C7 H7 119.6 . . ?
C5 C6 C7 120.2(5) . . ?
C5 C6 H6 119.9 . . ?
C7 C6 H6 119.9 . . ?
C2C N1C C2C 108.0(11) 4_355 . ?
C2C N1C C3C 129.0(9) 4_355 . ?
C2C N1C C3C 92.8(8) . . ?
C2C N1C H1N 109(2) 4_355 . ?
C2C N1C H1N 109(2) . . ?
C3C N1C H1N 107(4) . . ?
C16 C15 H15A 109.5 . . ?
C16 C15 H15B 109.5 . . ?
H15A C15 H15B 109.5 . . ?
C16 C15 H15C 109.5 . . ?
H15A C15 H15C 109.5 . . ?
H15B C15 H15C 109.5 . . ?
C19 C20 C19 120.2(7) . 4_355 ?
C19 C20 H20 119.9 . . ?
C19 C20 H20 119.9 4_355 . ?
C2C C1C H1C1 109.5 . . ?
C2C C1C H1C2 109.5 . . ?
H1C1 C1C H1C2 109.5 . . ?
C2C C1C H1C3 109.5 . . ?
H1C1 C1C H1C3 109.5 . . ?
H1C2 C1C H1C3 109.5 . . ?
C3C C4C H4C1 109.5 . . ?
C3C C4C H4C2 109.5 . . ?
H4C1 C4C H4C2 109.5 . . ?
C3C C4C H4C3 109.5 . . ?
H4C1 C4C H4C3 109.5 . . ?
H4C2 C4C H4C3 109.5 . . ?
C4C C3C N1C 112.3(10) . . ?
C4C C3C H3C1 109.1 . . ?
N1C C3C H3C1 109.1 . . ?
C4C C3C H3C2 109.1 . . ?
N1C C3C H3C2 109.1 . . ?
H3C1 C3C H3C2 107.9 . . ?
C1C C2C N1C 129.3(8) . . ?
C1C C2C H2C1 105.0 . . ?
N1C C2C H2C1 105.0 . . ?
C1C C2C H2C2 105.0 . . ?
N1C C2C H2C2 105.0 . . ?
H2C1 C2C H2C2 105.8 . . ?
 
_refine_diff_density_max    0.768
_refine_diff_density_min   -0.601
_refine_diff_density_rms    0.070

_shelx_res_file
;
TITL Ko846_150 in Cmc2(1)
    shelx.res
    created by SHELXL-2018/3 at 15:44:28 on 31-Oct-2021
REM Cmc2(1) (#36, found as Ccm2(1) in ba-c setting)
CELL 0.71073  18.792510  14.906376  11.179038  90.0000  90.0000  90.0000
ZERR    4.00   0.001197   0.000804   0.000736   0.0000   0.0000   0.0000
LATT -7
SYMM -x,-y, z+1/2
SYMM  x,-y, z+1/2
SYMM -x, y, z
SFAC C H N O Cl Er Y
UNIT 124 160 24 16 8 0.18 3.82
OMIT -2 52.64
MERG    2
L.S.   18
acta
EADP    Y1 Er1
EXYZ    Y1 Er1
BOND   $H
FMAP   2
PLAN    25
WGHT    0.027500    3.597300
FVAR       1.58099   0.50000
Y1    7   -1.000000   -0.327899   -0.080520    10.47750    0.01531    0.01463 =
         0.01722    0.00176    0.00000    0.00000
ER1   6   -1.000000   -0.327899   -0.080520    10.02250    0.01531    0.01463 =
         0.01722    0.00176    0.00000    0.00000
CL2   5   -1.000000   -0.218517    0.107559    10.50000    0.03979    0.01955 =
         0.02152   -0.00068    0.00000    0.00000
CL1   5   -1.000000   -0.398913   -0.292851    10.50000    0.03979    0.02525 =
         0.02027   -0.00066    0.00000    0.00000
N2    3   -1.000000   -0.185860   -0.186777    10.50000    0.02833    0.01519 =
         0.01827   -0.00019    0.00000    0.00000
O5    4   -0.909678   -0.413498   -0.012337    11.00000    0.01699    0.02420 =
         0.02731    0.00440    0.00099   -0.00069
N3    3   -0.823678   -0.320462   -0.095842    11.00000    0.01823    0.02381 =
         0.02515    0.00054    0.00034   -0.00014
N1    3   -0.882121   -0.268857   -0.125505    11.00000    0.01917    0.02352 =
         0.02185    0.00026    0.00035   -0.00085
O3    4   -0.692662   -0.371504   -0.092081    11.00000    0.01882    0.05196 =
         0.04292    0.00477    0.00114    0.00089
AFIX  83
H3    2   -0.726533   -0.338675   -0.106988    11.00000   -1.50000
AFIX   0
C3    1   -0.787841   -0.456670    0.002431    11.00000    0.02127    0.02749 =
         0.01822   -0.00600   -0.00589    0.00197
C8    1   -0.715442   -0.443443   -0.028982    11.00000    0.02159    0.03767 =
         0.02081   -0.00688   -0.00080    0.00230
C013  1   -0.938194   -0.143171   -0.209529    11.00000    0.03065    0.02232 =
         0.01772    0.00255    0.00239   -0.00462
C2    1   -0.844663   -0.393517   -0.036590    11.00000    0.01653    0.02385 =
         0.02250   -0.00488   -0.00113   -0.00049
C16   1   -0.872006   -0.195434   -0.184407    11.00000    0.02738    0.02238 =
         0.02348   -0.00020    0.00207   -0.00540
C19   1   -0.936415   -0.055918   -0.254486    11.00000    0.04611    0.02305 =
         0.02814    0.00642    0.00372   -0.00991
AFIX  43
H19   2   -0.893286   -0.027559   -0.269792    11.00000   -1.20000
AFIX   0
C4    1   -0.806217   -0.530862    0.070983    11.00000    0.02280    0.03017 =
         0.02814   -0.00181   -0.00474    0.00164
AFIX  43
H4    2   -0.853386   -0.539275    0.093510    11.00000   -1.20000
AFIX   0
C5    1   -0.755455   -0.592127    0.106015    11.00000    0.03658    0.03297 =
         0.03624    0.00338   -0.00955    0.00357
AFIX  43
H5    2   -0.768481   -0.641500    0.151918    11.00000   -1.20000
AFIX   0
C7    1   -0.665648   -0.506423    0.006464    11.00000    0.02044    0.05388 =
         0.03261   -0.01224   -0.00302    0.00459
AFIX  43
H7    2   -0.618193   -0.498894   -0.014890    11.00000   -1.20000
AFIX   0
C6    1   -0.685469   -0.580379    0.073176    11.00000    0.03596    0.04141 =
         0.03099   -0.00400   -0.00755    0.01905
AFIX  43
H6    2   -0.651431   -0.622325    0.095946    11.00000   -1.20000
AFIX   0
N1C   3   -1.000000   -0.313352    0.365461    10.50000    0.02447    0.02219 =
         0.02077    0.00409    0.00000    0.00000
C15   1   -0.801166   -0.162058   -0.225954    11.00000    0.03613    0.02566 =
         0.04433    0.00667    0.01255   -0.00869
AFIX  33
H15A  2   -0.807229   -0.106274   -0.267639    11.00000   -1.50000
H15B  2   -0.770634   -0.153072   -0.158155    11.00000   -1.50000
H15C  2   -0.780150   -0.205397   -0.278743    11.00000   -1.50000
AFIX   0
C20   1   -1.000000   -0.012645   -0.275729    10.50000    0.06060    0.02057 =
         0.03107    0.00777    0.00000    0.00000
AFIX  43
H20   2   -1.000000    0.045903   -0.304470    10.50000   -1.20000
AFIX   0
C1C   1   -1.115090   -0.380337    0.298136    11.00000    0.04687    0.08495 =
         0.04333    0.00738   -0.00422   -0.02760
AFIX  33
H1C1  2   -1.148568   -0.422460    0.330579    11.00000   -1.50000
H1C2  2   -1.138373   -0.323899    0.284757    11.00000   -1.50000
H1C3  2   -1.096847   -0.402794    0.223722    11.00000   -1.50000
AFIX   0
PART  -1
C4C   1   -0.985258   -0.162280    0.457394    10.50000    0.07484    0.04170 =
         0.08079   -0.03130    0.01096   -0.00392
AFIX  33
H4C1  2   -1.005469   -0.121205    0.514142    10.50000   -1.50000
H4C2  2   -0.937546   -0.176974    0.481007    10.50000   -1.50000
H4C3  2   -0.984580   -0.134981    0.379625    10.50000   -1.50000
AFIX   0
C3C   1   -1.028915   -0.245447    0.453380    10.50000    0.03463    0.03585 =
         0.03617    0.00434    0.00659    0.00867
AFIX  23
H3C1  2   -1.077289   -0.230084    0.431097    10.50000   -1.20000
H3C2  2   -1.030241   -0.272091    0.532511    10.50000   -1.20000
AFIX   0
PART   0
C2C   1   -1.061315   -0.368973    0.375408    11.00000    0.10299    0.25940 =
         0.18252    0.17616   -0.10502   -0.14613
AFIX  23
H2C1  2   -1.042824   -0.428809    0.389438    11.00000   -1.20000
H2C2  2   -1.083820   -0.350920    0.449693    11.00000   -1.20000
AFIX   0
H1N   2   -1.000000   -0.287801    0.294963    10.50000    0.00138

HKLF 4


REM  Ko846_150 in Cmc2(1)
REM wR2 = 0.0730, GooF = S = 1.059, Restrained GooF = 1.059 for all data
REM R1 = 0.0343 for 2307 Fo > 4sig(Fo) and 0.0387 for all 2472 data
REM 212 parameters refined using 1 restraints

END

WGHT      0.0291      3.2477

REM Highest difference peak  0.768,  deepest hole -0.601,  1-sigma level  0.070
Q1    1  -1.0000 -0.3299  0.0051  10.50000  0.05    0.77
Q2    1  -1.0000 -0.3308 -0.1669  10.50000  0.05    0.68
Q3    1  -1.0676 -0.3323  0.3923  11.00000  0.05    0.55
Q4    1  -1.0486 -0.3948  0.3418  11.00000  0.05    0.52
Q5    1  -1.0456 -0.3238 -0.0818  11.00000  0.05    0.38
Q6    1  -1.0552 -0.4062  0.4771  11.00000  0.05    0.35
Q7    1  -1.0000 -0.4008 -0.3797  10.50000  0.05    0.33
Q8    1  -1.0000 -0.2777  0.1779  10.50000  0.05    0.31
Q9    1  -1.1080 -0.2809  0.4233  11.00000  0.05    0.29
Q10   1  -1.0000 -0.4987  0.4150  10.50000  0.05    0.29
Q11   1  -1.0000 -0.4523  0.2147  10.50000  0.05    0.28
Q12   1  -1.0000 -0.4090  0.5168  10.50000  0.05    0.28
Q13   1  -1.0203 -0.4037 -0.1968  11.00000  0.05    0.26
Q14   1  -1.0620 -0.4046 -0.2598  11.00000  0.05    0.26
Q15   1  -1.0286 -0.3964 -0.1702  11.00000  0.05    0.25
Q16   1  -1.1192 -0.3486  0.2276  11.00000  0.05    0.25
Q17   1  -0.8081 -0.1704 -0.3239  11.00000  0.05    0.25
Q18   1  -1.0000 -0.2254  0.0165  10.50000  0.05    0.24
Q19   1  -1.0000  0.0199  0.4817  10.50000  0.05    0.24
Q20   1  -0.8131 -0.5458 -0.0027  11.00000  0.05    0.23
Q21   1  -0.9308 -0.5456  0.1024  11.00000  0.05    0.23
Q22   1  -1.0000 -0.3318 -0.3420  10.50000  0.05    0.23
Q23   1  -1.0000 -0.2003  0.4124  10.50000  0.05    0.23
Q24   1  -0.7863 -0.0939 -0.1791  11.00000  0.05    0.23
Q25   1  -1.0000 -0.2568 -0.1520  10.50000  0.05    0.23
;
_shelx_res_checksum   68760

_shelx_hkl_file
;
   0   0  -4 14164.6 457.942   3
   0   0  -3-25.4924 55.0960   3
   0   0  -2 267195. 4109.41   3
   0   0   2 260849. 4014.50   3
   0   0   3 129.268 76.1197   3
   0   0   4 20743.8 588.795   3
   0   0   5-30.3181 87.0339   3
   0   0   6 60070.6 1377.49   3
   0   0   7-63.6327 123.421   3
   0   0   8 1542.53 254.751   3
   0   0   9 329.372 218.788   3
   0   0  10 30254.7 1110.47   3
   0   0  11-433.874 252.646   3
   0   0  12 1992.47 374.930   3
   0   0  13 177.982 298.509   3
   0   0  14 3678.95 573.019   3
   0   2  -4 144157. 2498.27   3
   0  -2  -4 144534. 2484.84   3
   0   2  -3 566439. 8668.07   3
   0  -2  -3 572737. 8638.27   3
   0   2  -2 154498. 2483.15   3
   0  -2  -1 45351.2 793.959   1
   0   2   2 136510. 2201.20   3
   0  -2   3 585435. 8899.76   3
   0   2   3 575231. 8862.22   3
   0  -2   4 130245. 2275.03   3
   0   2   4 126592. 2247.30   3
   0   2   5 67151.4 1414.78   3
   0  -2   5 69002.8 1442.84   3
   0   2   6 19088.1 666.194   3
   0  -2   6 20478.3 696.829   3
   0  -2   7 3888.99 331.055   3
   0   2   7 3877.22 315.251   3
   0   2   8 12413.8 615.318   3
   0  -2   8 14201.5 652.975   3
   0   2   9 12493.7 658.923   3
   0  -2   9 12970.6 673.892   3
   0  -2  10 5522.40 481.879   3
   0   2  10 6287.03 509.146   3
   0   2  11 3939.38 444.394   3
   0  -2  11 3044.04 408.655   3
   0   2  12 2660.46 383.187   3
   0  -2  12 2227.44 375.760   3
   0   2  13 7068.11 652.229   3
   0   2  14 503.891 314.737   3
   0  -4  -3 39594.2 878.619   1
   0   4  -3 37167.5 862.609   3
   0  -4  -2 53655.0 1030.56   1
   0  -4  -2 51549.8 1098.97   2
   0  -4  -1 6856.10 246.838   1
   0  -4  -1 6925.93 308.661   2
   0   4  -1 6168.83 303.780   2
   0  -4   0 90259.2 1660.65   2
   0   4   0 85065.5 1665.03   2
   0   4   1 12472.9 342.546   1
   0   4   1 13527.0 442.494   2
   0   4   3 32036.8 743.572   3
   0   4   4 15461.0 506.505   3
   0   4   5 88938.2 1759.18   3
   0   4   6 9331.13 451.493   3
   0   4   7 69690.1 1617.05   3
   0   4   8 15154.0 678.089   3
   0   4   9 9911.44 586.134   3
   0   4  10 2651.44 358.906   3
   0   4  11 9503.52 661.796   3
   0   4  12 297.236 270.927   3
   0   4  13 7242.50 659.997   3
   0   4  14 3194.43 510.319   3
   0  -6  -3 21554.6 624.582   1
   0  -6  -2 87930.3 1633.73   1
   0  -6  -1 321.525 113.178   2
   0   6  -1 392.936 137.221   2
   0   6   0 10294.4 484.551   2
   0  -6   0 10652.9 469.519   2
   0   6   1 160.888 60.2457   1
   0   6   1 95.9946 84.2089   2
   0   6   4 10173.7 419.662   3
   0   6   5 12992.0 521.474   3
   0   6   6 17990.4 669.120   3
   0   6   7 1499.76 221.301   3
   0   6   8 53778.9 1445.89   3
   0   6   9 1511.23 266.894   3
   0   6  10 12783.2 718.963   3
   0   6  11 139.342 201.364   3
   0   6  12 9941.75 721.126   3
   0   6  13 640.074 335.920   3
   0   8  -2 11051.2 576.268   2
   0   8  -1 22881.9 854.205   2
   0   8   0 18084.9 569.445   1
   0   8   0 17548.7 741.197   2
   0   8   1 31869.8 772.862   1
   0   8   1 29986.0 998.487   2
   0   8   2 10361.7 398.032   1
   0   8   4 1963.79 207.260   3
   0   8   5 12976.5 548.901   3
   0   8   6 8177.71 453.717   3
   0   8   7 14131.8 640.272   3
   0   8   8 2751.78 319.668   3
   0   8   9 4438.56 430.071   3
   0   8  10 2559.92 354.022   3
   0   8  11 21713.2 1027.85   3
   0   8  12 7562.45 642.506   3
   0   8  13 457.681 278.850   3
   0  10  -4 333.047 164.637   2
   0  10  -3 6592.70 503.860   2
   0  10  -2 5030.43 437.264   2
   0  10  -1 18226.0 837.329   2
   0  10   0 2578.42 218.241   1
   0  10   0 2275.52 307.048   2
   0  10   1 23421.4 949.908   2
   0  10   1 24227.2 688.941   1
   0  10   2 4323.88 271.412   1
   0  10   2 4254.67 386.500   2
   0  10   5 17240.7 672.691   3
   0  10   6 3951.21 339.707   3
   0  10   7 10263.4 560.609   3
   0  10   8 6831.49 489.993   3
   0  10   9 6680.89 515.786   3
   0  10  10 2999.76 387.667   3
   0  10  11 6264.02 577.661   3
   0  10  12 182.142 255.571   3
   0  10  13 2209.09 416.035   3
   0  12  -6 6722.03 607.210   2
   0  12  -5 14142.3 836.840   2
   0  12  -4 11517.3 739.041   2
   0  12  -3 2346.84 352.400   2
   0  12  -2 15768.1 859.048   2
   0  12  -1 1208.79 296.426   2
   0  12  -1 1443.50 189.101   1
   0  12   0 13585.6 770.520   2
   0  12   0 13467.6 533.533   1
   0  12   1 676.944 133.346   1
   0  12   1 1247.24 286.621   2
   0  12   2 14543.6 789.198   2
   0  12   5 14645.3 644.257   3
   0  12   6 6052.35 446.463   3
   0  12   7 1314.80 239.918   3
   0  12   8 4724.11 421.763   3
   0  12   9 2850.88 362.814   3
   0  12  10 1649.33 332.319   3
   0  12  11 663.736 304.014   3
   0  12  12 1287.87 351.093   3
   0  14  -9 2235.40 470.713   2
   0  14  -8 4359.84 583.416   2
   0  14  -7 804.341 322.065   2
   0  14  -6 4917.62 575.452   2
   0  14  -5 212.339 219.612   2
   0  14  -4 9622.80 728.390   2
   0  14  -3 5912.28 572.705   2
   0  14  -2 12691.8 594.210   1
   0  14  -2 12445.5 828.679   2
   0  14  -1 9262.42 701.245   2
   0  14  -1 9322.55 469.178   1
   0  14   0 12565.0 528.701   1
   0  14   0 14033.2 861.108   2
   0  14   1 6621.04 369.230   1
   0  14   1 6380.72 570.979   2
   0  14   5 785.546 215.409   3
   0  14   6 2723.47 319.103   3
   0  14   7 379.872 207.397   3
   0  16  -7 2103.66 438.480   2
   0  16  -6 225.173 285.247   2
   0  16  -5 7194.82 714.498   2
   0  16  -4 597.511 301.168   2
   0  16  -3 5386.36 596.693   2
   0  16  -2 6571.80 636.318   2
   0  16  -1 16970.5 1024.10   2
   0  16   0 2711.13 410.624   2
   0  16   1 17426.6 1012.42   2
   0  18  -4 5158.49 661.061   2
   0  18  -3 5570.84 669.121   2
   0  18  -2 1202.24 381.071   2
   0  18  -1 2668.26 484.442   2
   0  18   0 6979.67 676.485   2
   0  18   1 3165.60 503.492   2
  -1   1  -4 24538.1 660.909   3
  -1  -1  -4 25273.7 652.572   3
   1  -1  -4 26344.5 673.513   3
   1   1  -4 25489.7 667.524   3
  -1   1  -3 5013.34 229.231   3
  -1  -1  -3 4742.58 218.182   3
   1  -1  -3 4667.28 220.649   3
   1   1  -3 5119.27 228.794   3
  -1   1  -2 32277.7 653.888   3
   1   1  -2 32538.4 644.991   3
   1  -1  -2 32229.3 654.795   3
  -1  -1  -2 31555.0 629.230   3
   1   1   2 33620.5 657.644   3
  -1  -1   2 33938.6 673.314   3
  -1   1   2 33708.5 678.960   3
   1  -1   3 1755.74 144.288   3
  -1  -1   3 1629.36 139.206   3
  -1   1   3 1720.66 139.778   3
   1   1   3 1686.15 135.576   3
   1  -1   4 25264.2 669.436   3
   1   1   4 24859.6 652.214   3
  -1   1   4 24289.5 658.175   3
  -1  -1   4 24145.3 657.293   3
  -1   1   5 31787.1 845.080   3
   1  -1   5 33541.0 870.866   3
  -1  -1   5 33991.6 880.251   3
   1   1   5 33179.7 859.249   3
   1   1   6 1106.54 170.008   3
  -1   1   6 1234.04 184.019   3
  -1  -1   6 1334.15 203.096   3
   1  -1   6 1314.75 183.626   3
  -1   1   7 9268.75 491.970   3
  -1  -1   7 9147.36 490.183   3
   1   1   7 9472.97 482.164   3
   1  -1   7 9397.33 487.316   3
  -1   1   8 2525.87 287.836   3
  -1  -1   8 3012.14 315.270   3
   1  -1   8 3057.75 313.921   3
   1   1   8 3112.72 303.508   3
   1  -1   9 14059.2 698.782   3
   1   1   9 11550.5 635.922   3
  -1  -1   9 12890.3 670.177   3
  -1   1   9 12752.2 668.880   3
  -1   1  10 1458.19 275.110   3
   1  -1  10 1864.87 317.890   3
  -1  -1  10 2127.15 325.097   3
   1   1  10 1369.00 269.126   3
   1   1  11 10346.1 665.065   3
   1  -1  11 9777.17 674.083   3
  -1  -1  11 8847.79 639.724   3
  -1   1  11 10203.4 670.844   3
   1   1  12 346.753 273.293   3
   1  -1  12 72.9059 223.703   3
  -1   1  12 271.935 237.437   3
  -1  -1  12-310.830 258.718   3
  -1   1  13 1748.93 402.396   3
  -1  -1  13 1764.03 400.828   3
   1   1  13 2580.84 451.885   3
   1   1  14 4345.00 561.069   3
  -1   1  14 4063.88 566.475   3
  -1  -3  -4 83396.9 1562.77   3
  -1   3  -3 82001.9 1517.12   3
  -1  -3  -3 79258.9 1447.19   3
   1   3  -3 78996.3 1477.65   3
  -1  -3  -3 84633.5 1547.42   1
  -1  -3  -2 63942.2 1204.97   1
   1   3  -2 64313.9 1156.46   3
   1  -3  -1 8679.94 223.601   1
  -1  -3  -1 8822.96 294.185   2
   1  -3  -1 8421.03 318.665   2
  -1  -3  -1 8308.74 280.285   1
  -1   3  -1 8576.61 328.753   2
  -1   3   0 56121.0 1141.72   2
   1  -3   0 56128.8 1132.40   2
   1   3   0 56506.5 1088.84   2
  -1  -3   0 59801.7 1089.27   2
   1   3   1 9714.51 306.770   2
   1   3   1 9355.90 293.629   1
  -1   3   1 9712.82 336.669   2
   1   3   2 59075.3 1052.40   3
  -1   3   3 74243.3 1414.44   3
  -1  -3   3 76730.1 1424.73   3
   1   3   3 76168.7 1376.33   3
   1   3   4 89685.5 1659.63   3
  -1   3   4 87029.3 1688.29   3
  -1  -3   4 90025.5 1697.21   3
   1   3   5 12207.3 464.581   3
  -1  -3   5 12648.6 497.665   3
  -1   3   5 12248.5 483.492   3
   1   3   6 29479.6 858.042   3
  -1   3   6 29557.1 872.416   3
  -1  -3   6 30763.4 894.899   3
  -1  -3   7 6250.48 403.642   3
  -1   3   7 5298.27 372.239   3
   1   3   7 6137.19 384.921   3
   1   3   8 5337.81 401.943   3
  -1  -3   8 5877.57 435.866   3
  -1   3   8 4724.14 378.059   3
   1   3   9 3598.74 362.530   3
  -1   3   9 2918.71 348.752   3
  -1  -3   9 4162.49 397.887   3
   1   3  10 7207.04 529.495   3
  -1  -3  10 7551.49 556.704   3
  -1   3  10 6758.25 530.487   3
  -1   3  11 3114.62 405.411   3
   1   3  11 3575.27 409.771   3
  -1  -3  11 3104.63 388.497   3
  -1  -3  12 5158.81 532.427   3
  -1   3  12 4166.67 472.772   3
   1   3  12 4493.50 488.524   3
  -1   3  13 585.161 280.048   3
   1   3  13 469.168 275.374   3
   1   3  14 5524.10 633.501   3
  -1   3  14 4918.12 566.106   3
   1   5  -3 14729.2 477.932   3
   1  -5  -3 16142.7 495.333   1
  -1  -5  -3 15883.1 535.736   2
  -1  -5  -3 16139.1 525.661   1
  -1  -5  -2 41512.3 924.683   1
  -1  -5  -2 43197.4 979.501   2
   1  -5  -2 40417.2 1005.62   2
   1  -5  -2 40855.6 844.847   1
  -1  -5  -1 4920.46 279.957   2
   1  -5  -1 5090.28 297.658   2
   1   5  -1 4976.67 292.493   2
  -1   5  -1 4625.96 302.701   2
   1  -5   0 22188.1 685.798   2
   1   5   0 21180.8 659.827   2
  -1  -5   0 22939.3 650.424   2
  -1   5   0 21235.7 698.197   2
   1   5   1 2802.87 188.585   1
  -1   5   1 3128.86 141.904   1
  -1   5   1 2995.47 231.813   2
   1   5   1 2571.37 204.839   2
   1   5   2 39257.7 866.466   1
   1   5   3 14712.1 442.158   3
  -1   5   4 30758.4 806.948   3
   1   5   4 30115.0 763.234   3
  -1   5   5 6290.46 357.366   3
   1   5   5 6470.74 336.008   3
  -1   5   6 25923.2 829.558   3
   1   5   6 26354.1 805.091   3
   1   5   7 26385.9 862.884   3
  -1   5   7 26481.1 892.165   3
  -1   5   8 21740.9 850.929   3
   1   5   8 23835.3 861.662   3
   1   5   9 16388.1 759.561   3
  -1   5   9 15195.2 734.439   3
   1   5  10 3922.15 410.697   3
  -1   5  10 3679.44 406.666   3
  -1   5  11 1195.82 292.144   3
   1   5  11 1217.46 282.410   3
  -1   5  12 4411.68 490.196   3
   1   5  12 5755.17 539.628   3
  -1   5  13 3931.89 539.957   3
   1   5  13 3557.52 488.470   3
   1   5  14 1217.78 351.542   3
   1  -7  -3 31737.8 802.238   1
  -1   7  -2 3500.07 320.370   2
   1  -7  -2 3683.31 219.434   1
   1   7  -2 3701.26 311.434   2
  -1   7  -1 28617.4 933.962   2
   1   7  -1 28043.1 891.859   2
  -1   7   0 135.746 65.0076   1
   1   7   0 236.553 108.822   2
  -1   7   0 169.734 139.760   2
  -1   7   1 22223.1 793.128   2
   1   7   1 20511.6 740.573   2
  -1   7   1 22286.6 537.070   1
   1   7   1 22874.5 643.734   1
   1   7   2 4293.22 249.655   1
   1   7   4 10157.3 419.099   3
   1   7   5 9655.72 431.775   3
  -1   7   5 9627.10 463.995   3
  -1   7   6 9188.86 489.054   3
   1   7   6 9190.48 458.796   3
   1   7   7 34878.6 1043.32   3
  -1   7   7 35053.4 1082.05   3
  -1   7   8 739.363 211.330   3
   1   7   8 870.992 201.544   3
  -1   7   9 14678.6 748.104   3
   1   7   9 13399.5 683.331   3
   1   7  10 3153.37 393.418   3
  -1   7  10 3449.78 411.483   3
  -1   7  11 15303.9 846.990   3
   1   7  11 14306.6 814.171   3
  -1   7  12 1834.80 391.777   3
   1   7  12 1395.77 347.608   3
   1   7  13 3422.75 484.693   3
  -1   7  13 4490.10 561.701   3
  -1   9  -4 27269.5 1025.96   2
  -1   9  -3 3570.06 368.995   2
   1   9  -3 3458.82 347.426   2
   1  -9  -3 3596.84 263.930   1
  -1   9  -2 20404.0 855.245   2
   1   9  -2 20166.5 832.133   2
   1   9  -1 14102.5 678.652   2
  -1   9  -1 12609.1 663.628   2
  -1   9   0 6611.54 478.301   2
   1   9   0 6701.92 370.120   1
  -1   9   0 6449.89 294.632   1
   1   9   0 6994.26 474.339   2
  -1   9   1 13969.9 435.817   1
   1   9   1 13010.8 645.729   2
   1   9   1 14845.9 534.406   1
  -1   9   1 12985.8 657.388   2
  -1   9   2 26482.5 967.333   2
   1   9   2 24869.9 921.790   2
   1   9   2 30017.9 799.301   1
   1   9   4 23621.3 719.179   3
  -1   9   5 3774.37 313.542   3
   1   9   5 3770.21 294.530   3
   1   9   6 21728.5 766.538   3
  -1   9   6 22682.9 827.044   3
  -1   9   7 3374.73 348.130   3
   1   9   7 3368.79 315.246   3
   1   9   8 7280.12 481.824   3
  -1   9   8 6393.85 479.465   3
  -1   9   9 2696.24 358.855   3
   1   9   9 2619.09 322.826   3
   1   9  10 11264.0 689.584   3
  -1   9  10 11555.7 716.279   3
  -1   9  11 2509.78 414.789   3
   1   9  11 2602.88 385.207   3
  -1   9  12 8963.66 717.812   3
   1   9  12 9333.30 707.243   3
   1   9  13 405.837 319.659   3
  -1   9  13 656.779 296.251   3
  -1  11  -5 147.038 192.530   2
  -1  11  -4 15191.3 822.337   2
   1  11  -4 14925.4 802.888   2
  -1  11  -3 7916.12 587.209   2
   1  11  -3 7965.87 581.992   2
  -1  11  -2 3799.96 415.385   2
   1  11  -2 3944.29 413.463   2
  -1  11  -1 4393.99 437.323   2
  -1  11  -1 4589.77 294.036   1
   1  11  -1 4241.86 417.616   2
   1  11   0 35924.8 1008.10   1
   1  11   0 36239.3 1270.17   2
  -1  11   0 37320.9 1300.35   2
  -1  11   0 36775.7 892.202   1
  -1  11   1 3327.88 373.959   2
  -1  11   1 3733.27 234.259   1
   1  11   1 4344.68 296.912   1
   1  11   1 3938.30 393.235   2
   1  11   2 4869.56 317.457   1
  -1  11   2 4068.98 417.876   2
   1  11   2 4348.80 403.549   2
   1  11   4 17714.8 647.560   3
  -1  11   5 314.020 149.316   3
   1  11   5 217.860 124.822   3
  -1  11   6 12142.6 619.397   3
   1  11   6 11502.0 560.151   3
  -1  11   7 10351.0 595.121   3
   1  11   7 11330.0 585.292   3
   1  11   8 1019.61 243.933   3
  -1  11   8 1228.82 299.522   3
  -1  11   9 492.439 240.526   3
   1  11   9 681.658 221.853   3
   1  11  10 4341.04 472.266   3
  -1  11  10 4857.26 504.351   3
  -1  11  11 754.504 304.901   3
   1  11  11 1314.92 333.515   3
  -1  11  12 2600.32 440.844   3
   1  11  12 2120.67 419.775   3
  -1  13  -8 936.732 324.799   2
  -1  13  -7 4077.00 515.490   2
   1  13  -7 4504.83 541.759   2
   1  13  -6 551.398 284.379   2
  -1  13  -6 880.445 289.774   2
  -1  13  -5 8078.34 664.136   2
   1  13  -5 6589.37 602.100   2
  -1  13  -4 193.686 228.378   2
   1  13  -4 383.852 252.479   2
  -1  13  -3 17319.6 953.219   2
   1  13  -3 15567.2 880.992   2
   1  13  -2 1926.44 344.721   2
  -1  13  -2 1432.98 299.021   2
   1  13  -1 16042.5 673.481   1
  -1  13  -1 15354.2 562.382   1
   1  13  -1 14643.0 846.876   2
  -1  13  -1 17201.7 917.087   2
  -1  13   0 1750.00 347.164   2
   1  13   0 1154.08 171.437   1
  -1  13   0 1295.02 156.817   1
   1  13   0 1548.48 321.634   2
   1  13   1 12183.0 544.401   1
  -1  13   1 11647.4 455.147   1
   1  13   1 12974.7 770.713   2
  -1  13   1 13139.3 785.813   2
   1  13   2 1449.68 281.617   2
   1  13   2 2033.43 240.842   1
   1  13   4 211.303 161.695   3
  -1  13   5 8171.64 511.313   3
   1  13   5 8189.83 471.490   3
  -1  13   6 835.297 220.383   3
   1  13   6 737.427 200.406   3
  -1  13   7 2981.79 361.639   3
   1  13   7 2364.00 299.041   3
  -1  13   8 957.997 269.182   3
   1  13   8 930.266 253.035   3
  -1  13   9 11041.1 704.806   3
  -1  13  10-233.737 279.826   3
  -1  13  11 1819.91 398.788   3
  -1  15  -8 2598.61 513.340   2
   1  15  -8 1665.37 419.720   2
  -1  15  -7 3554.98 521.946   2
   1  15  -7 3934.25 547.306   2
  -1  15  -6 4819.12 597.171   2
   1  15  -6 4763.12 620.448   2
   1  15  -5 1106.78 337.527   2
  -1  15  -5 1044.08 356.639   2
  -1  15  -4 5135.64 573.631   2
   1  15  -4 5026.24 563.107   2
  -1  15  -3 4260.05 532.694   2
   1  15  -3 5306.72 580.619   2
  -1  15  -2 6881.69 646.653   2
   1  15  -2 6411.00 608.282   2
   1  15  -1 2113.05 378.381   2
  -1  15  -1 2242.40 409.786   2
   1  15   0 26169.8 1227.63   2
  -1  15   0 29238.9 1318.71   2
  -1  15   1 1218.61 300.053   2
   1  15   1 1014.54 300.351   2
  -1  15   5 1105.92 271.561   3
   1  17  -6 3469.84 553.638   2
  -1  17  -6 3570.68 564.408   2
  -1  17  -5 6917.15 740.207   2
   1  17  -5 7612.08 750.118   2
  -1  17  -4 6317.33 675.206   2
   1  17  -4 7597.59 729.831   2
   1  17  -3-168.358 313.199   2
  -1  17  -3-242.132 326.303   2
  -1  17  -2 6973.60 702.184   2
   1  17  -2 6267.02 665.754   2
  -1  17  -1 1985.36 403.931   2
   1  17  -1 1991.36 404.108   2
   1  17   0 4588.51 542.473   2
  -1  17   0 4668.62 572.022   2
  -1  17   1 1945.37 440.722   2
   1  17   1 2133.04 415.387   2
   1  19  -3 3334.93 529.465   2
  -1  19  -2 745.703 355.623   2
   1  19  -2 897.621 331.399   2
  -1  19  -1 3942.12 583.599   2
   1  19  -1 3361.52 525.496   2
  -1  19   0 344.164 268.153   2
   1  19   0 936.262 398.769   2
   2   0  -4 39803.7 922.608   3
  -2   0  -4 40778.4 903.215   3
   2   0  -3 237.088 78.3288   3
  -2   0  -3-58.2151 69.2131   3
   2   0  -2 95945.9 1609.68   3
  -2   0  -2 95349.9 1591.35   3
   2   0   1 45.6506 30.9463   1
  -2   0   2 69539.4 1221.25   3
   2   0   3 99.0107 66.5840   3
  -2   0   3-20.7883 66.1749   3
   2   0   4 44234.8 965.793   3
  -2   0   4 42623.2 969.819   3
  -2   0   5 99.2431 82.8055   3
   2   0   5-45.0423 87.1928   3
   2   0   6 10494.3 481.671   3
  -2   0   6 11087.8 497.428   3
  -2   0   7 70.1880 138.323   3
   2   0   7 7.63596 123.735   3
  -2   0   8 8717.21 518.326   3
   2   0   8 8313.79 491.753   3
   2   0   9-45.5251 173.026   3
  -2   0   9 320.815 204.701   3
   2   0  10 23980.0 993.920   3
  -2   0  10 23730.7 983.056   3
   2   0  11 54.3978 221.892   3
  -2   0  11 17.4653 212.957   3
  -2   0  12 3884.85 457.618   3
   2   0  12 3336.77 435.598   3
  -2   0  13 35.5807 296.928   3
  -2  -2  -4 17167.1 502.998   3
   2   2  -4 18286.2 538.061   3
  -2   2  -3 15776.3 468.547   3
  -2  -2  -3 15261.0 481.700   1
   2   2  -3 14809.1 434.385   3
  -2  -2  -3 14441.6 407.108   3
   2   2  -2 106773. 1771.29   3
  -2  -2  -2 106930. 1853.73   1
  -2  -2  -2 107231. 1730.92   3
  -2   2  -1 858.366 96.5654   2
   2   2  -1 828.910 62.7725   3
  -2  -2  -1 825.767 87.1968   1
  -2  -2  -1 769.351 61.8339   2
   2  -2   0 132123. 2202.67   2
  -2   2   0 132121. 2191.26   2
   2   2   1 4272.82 196.532   1
  -2  -2   1 4467.98 143.347   3
  -2  -2   2 115199. 1906.04   3
   2   2   2 116020. 1867.90   3
  -2   2   3 24813.1 623.230   3
   2   2   3 24726.6 581.638   3
  -2  -2   3 24914.3 607.296   3
  -2  -2   4 11553.4 423.960   3
  -2   2   4 11502.0 426.722   3
   2   2   4 11417.8 401.982   3
   2   2   5 26912.1 745.872   3
  -2  -2   5 27018.2 771.501   3
  -2   2   5 26962.3 766.882   3
  -2   2   6 15749.3 608.328   3
  -2  -2   6 15784.4 601.956   3
   2   2   6 15169.9 575.804   3
  -2  -2   7 5188.36 368.505   3
   2   2   7 4900.59 347.737   3
  -2   2   7 5186.08 373.329   3
  -2   2   8 447.704 166.059   3
   2   2   8 1176.83 203.530   3
  -2  -2   8 1199.67 217.877   3
   2   2   9 12241.7 645.775   3
  -2   2   9 12554.0 663.167   3
  -2  -2   9 12837.1 656.044   3
  -2   2  10 2640.90 351.268   3
   2   2  10 2506.55 320.042   3
  -2  -2  10 3187.69 387.946   3
   2   2  11 1996.19 335.411   3
  -2  -2  11 2439.72 353.943   3
  -2   2  11 2638.53 375.829   3
  -2  -2  12 2967.81 422.013   3
  -2   2  12 2854.88 432.436   3
   2   2  12 3604.80 458.685   3
   2   2  13 8830.80 715.593   3
  -2   2  13 8033.90 690.914   3
  -2  -2  13 8134.05 694.242   3
   2   2  14 200.538 272.376   3
  -2  -4  -4 11943.0 405.866   3
  -2  -4  -3 71035.5 1431.07   1
   2   4  -3 70095.7 1337.60   3
  -2  -4  -2 7958.25 335.102   1
   2   4  -2 8136.99 276.475   3
   2  -4  -2 8194.94 359.388   2
  -2  -4  -2 7746.81 305.388   2
  -2   4  -1 25163.8 726.193   2
  -2  -4  -1 25068.6 628.062   2
   2  -4  -1 26145.1 710.763   2
   2   4  -1 26621.2 527.438   3
   2  -4  -1 25373.1 485.347   1
   2  -4   0 1144.98 144.245   2
  -2   4   0 904.411 138.127   2
   2   4   0 965.915 117.607   2
   2   4   1 17194.7 510.099   1
   2   4   1 17375.8 490.788   2
  -2   4   1 17540.6 546.253   2
   2   4   2 7575.62 237.173   3
   2   4   2 6801.93 302.672   1
   2   4   3 78336.3 1405.57   3
  -2  -4   4 16491.1 535.698   3
  -2   4   4 15930.2 540.099   3
   2   4   4 15848.3 489.885   3
  -2  -4   5 38830.5 986.978   3
  -2   4   5 39092.3 1001.14   3
   2   4   5 38061.6 932.610   3
  -2   4   6 6390.45 387.759   3
   2   4   6 6964.32 374.997   3
  -2  -4   6 6688.11 393.291   3
  -2  -4   7 14207.1 630.085   3
  -2   4   7 14494.8 639.071   3
   2   4   7 14071.8 594.923   3
  -2   4   8 4276.76 368.508   3
   2   4   8 4847.27 378.849   3
  -2  -4   8 5054.60 398.923   3
  -2  -4   9 5669.90 462.429   3
  -2   4   9 4932.49 419.393   3
   2   4   9 5145.54 423.756   3
  -2   4  10 949.644 259.549   3
   2   4  10 675.818 242.106   3
  -2  -4  10 1268.87 280.200   3
  -2   4  11 5104.38 493.631   3
   2   4  11 6301.68 526.682   3
  -2  -4  11 5535.11 514.968   3
   2   4  12 511.785 263.970   3
  -2   4  12-31.4340 247.507   3
  -2   4  13 6096.91 605.370   3
   2   4  13 6179.46 609.970   3
   2   4  14 5008.68 590.818   3
   2   6  -3 20125.5 569.228   3
   2  -6  -3 20051.1 565.101   1
  -2  -6  -3 19741.4 640.071   2
  -2   6  -2 33348.2 981.925   2
   2  -6  -2 33891.9 717.330   1
   2   6  -2 33428.2 758.243   3
  -2  -6  -2 33596.3 880.008   2
  -2  -6  -2 32273.9 869.882   1
  -2  -6  -1 751.843 135.164   2
  -2   6  -1 700.368 164.507   2
   2   6  -1 712.739 149.787   2
  -2   6   0 11062.1 281.847   1
  -2   6   0 10596.0 508.408   2
   2   6   0 11092.2 484.560   2
  -2   6   1 755.681 149.334   2
   2   6   1 594.339 124.107   1
   2   6   1 638.271 138.396   2
   2   6   2 33841.9 849.504   1
   2   6   3 18047.4 501.028   3
   2   6   4 13539.1 459.236   3
   2   6   5 1110.39 147.936   3
  -2   6   5 1155.29 183.204   3
  -2   6   6 18894.8 713.598   3
   2   6   6 18857.8 658.315   3
   2   6   7 15297.1 634.541   3
  -2   6   7 16910.7 708.971   3
  -2   6   8 13306.0 658.804   3
   2   6   8 12366.3 609.181   3
  -2   6   9 2423.57 335.230   3
   2   6   9 2436.48 305.369   3
  -2   6  10 4251.78 437.823   3
   2   6  10 4750.08 441.103   3
   2   6  11 118.495 206.929   3
  -2   6  11 464.037 273.419   3
  -2   6  12 3556.08 449.627   3
   2   6  12 4238.65 470.437   3
   2   6  13 1318.37 332.684   3
  -2   6  13 1284.94 362.218   3
   2   6  14 1100.22 408.043   3
   2  -8  -3 15348.0 502.592   1
  -2   8  -3 13774.1 681.528   2
  -2   8  -2 14749.2 697.622   2
   2   8  -2 15861.6 673.421   2
  -2   8  -1 8043.22 509.727   2
   2   8  -1 8533.14 480.028   2
   2   8   0 6141.68 408.394   2
  -2   8   0 5434.52 218.412   1
  -2   8   0 5916.20 427.916   2
   2   8   1 11778.8 572.632   2
  -2   8   1 12904.0 628.938   2
   2   8   1 13595.0 529.290   1
   2   8   2 13266.4 586.638   2
   2   8   2 14815.6 545.840   1
   2   8   3 12017.2 419.268   3
   2   8   3 10971.9 482.523   1
   2   8   4 8329.85 371.991   3
   2   8   5 6002.10 337.620   3
  -2   8   5 5792.08 385.840   3
   2   8   6 6536.10 379.018   3
  -2   8   6 5943.67 415.980   3
   2   8   7 17042.7 686.035   3
  -2   8   7 17708.3 754.497   3
   2   8   8 4990.72 400.381   3
  -2   8   8 5544.62 447.950   3
   2   8   9 770.511 215.920   3
  -2   8   9 992.318 280.880   3
  -2   8  10 5023.75 482.443   3
   2   8  10 4987.55 454.551   3
  -2   8  11 7918.06 635.272   3
   2   8  11 8735.28 645.979   3
  -2   8  12 4179.71 506.621   3
   2   8  12 4052.31 471.129   3
  -2   8  13 556.831 344.254   3
   2   8  13 717.534 307.598   3
  -2  10  -5 19885.3 937.937   2
  -2  10  -4 1189.69 268.223   2
   2  10  -3 4306.81 400.885   2
  -2  10  -3 3897.09 414.042   2
  -2  10  -2 2060.54 295.428   2
   2  10  -2 2176.16 294.265   2
   2  10  -1 24308.8 956.454   2
  -2  10  -1 24789.8 1020.99   2
  -2  10   0 2371.28 328.371   2
   2  10   0 2558.69 252.157   1
   2  10   0 2270.54 300.023   2
  -2  10   0 2390.84 157.761   1
   2  10   1 26455.5 995.574   2
   2  10   1 27788.4 857.977   1
  -2  10   1 26378.0 1036.07   2
   2  10   2 1740.50 256.617   2
   2  10   2 2207.07 241.169   1
   2  10   3 4897.09 337.132   1
   2  10   4 989.810 157.870   3
   2  10   5 22867.5 735.895   3
   2  10   6 5507.43 362.626   3
  -2  10   6 5225.34 409.228   3
   2  10   7 9452.80 515.569   3
  -2  10   7 9914.60 584.546   3
   2  10   8 2689.90 317.632   3
  -2  10   8 2975.58 372.947   3
  -2  10   9 5150.82 477.448   3
   2  10   9 5177.97 442.111   3
   2  10  10 1282.45 301.102   3
  -2  10  10 977.864 293.567   3
   2  10  11 8384.63 637.313   3
  -2  10  11 8992.76 677.380   3
   2  10  12 790.878 313.692   3
  -2  10  12 114.172 293.798   3
   2  10  13 2299.76 424.499   3
  -2  12  -7 671.865 280.261   2
  -2  12  -6 2992.88 429.672   2
  -2  12  -5 6885.40 605.722   2
   2  12  -5 8934.15 634.261   2
  -2  12  -4 17261.0 924.138   2
   2  12  -4 16700.9 879.117   2
  -2  12  -3 3075.37 401.181   2
   2  12  -3 2671.17 352.990   2
   2  12  -2 24819.9 1069.10   2
  -2  12  -2 26985.1 1152.43   2
  -2  12  -1 2850.80 387.537   2
  -2  12  -1 3577.88 224.960   1
   2  12  -1 3584.53 402.755   2
  -2  12   0 10389.4 372.160   1
   2  12   0 11370.5 553.933   1
  -2  12   0 10807.3 713.044   2
   2  12   0 10488.9 674.751   2
   2  12   1 4100.06 319.949   1
  -2  12   1 3227.21 408.780   2
   2  12   1 4331.68 443.934   2
   2  12   2 23991.4 1015.05   2
   2  12   2 26062.9 852.404   1
   2  12   4 20967.6 699.349   3
   2  12   5 8436.99 446.736   3
   2  12   6 1597.29 221.917   3
  -2  12   6 1785.52 274.799   3
  -2  12   7 1518.22 277.133   3
   2  12   7 700.305 195.039   3
   2  12   8 6669.65 477.544   3
  -2  12   8 7264.70 550.136   3
   2  12   9 788.474 201.687   3
  -2  12   9 1242.38 287.999   3
  -2  12  10 2697.39 425.831   3
  -2  12  11 412.396 291.297   3
  -2  12  12 2257.14 440.590   3
  -2  14  -9 1032.46 375.524   2
  -2  14  -8 4918.37 589.204   2
   2  14  -8 5813.27 642.994   2
   2  14  -7 639.571 274.911   2
  -2  14  -7 960.887 325.774   2
  -2  14  -6 2698.54 437.224   2
   2  14  -6 2836.76 475.015   2
   2  14  -5 2043.33 369.111   2
  -2  14  -5 2099.93 381.595   2
   2  14  -4 9173.01 702.668   2
  -2  14  -4 8422.80 705.794   2
   2  14  -3 1336.03 306.656   2
  -2  14  -3 1876.38 365.800   2
   2  14  -2 11208.0 770.579   2
  -2  14  -2 10035.5 755.273   2
   2  14  -1 14824.4 688.784   1
  -2  14  -1 14655.2 896.103   2
   2  14  -1 14272.2 855.255   2
  -2  14   0 3692.54 478.951   2
   2  14   0 3982.23 466.204   2
   2  14   0 3806.00 330.964   1
   2  14   1 13965.7 628.192   1
   2  14   1 14289.1 838.120   2
  -2  14   1 13985.1 857.232   2
   2  14   2 7993.41 469.354   1
  -2  14   6 1184.33 264.274   3
  -2  14   7 792.123 230.786   3
  -2  14   8 6229.10 541.238   3
  -2  14   9 401.000 229.547   3
  -2  14  10 1953.90 375.466   3
   2  16  -7 3967.46 578.194   2
  -2  16  -7 3431.71 541.289   2
   2  16  -6-50.6012 238.576   2
  -2  16  -6 60.7119 281.355   2
  -2  16  -5 7919.61 753.386   2
   2  16  -5 8303.38 744.924   2
  -2  16  -4 1165.37 361.392   2
   2  16  -4 1364.29 369.395   2
   2  16  -3 3200.66 476.734   2
  -2  16  -3 2889.28 484.969   2
   2  16  -2 316.637 276.643   2
  -2  16  -2 279.113 276.061   2
  -2  16  -1 7819.87 718.506   2
   2  16  -1 7537.97 666.553   2
   2  16   0 577.921 291.822   2
  -2  16   0 567.755 265.251   2
  -2  16   1 4474.76 554.040   2
   2  16   1 5207.46 546.335   2
   2  18  -5 706.396 357.467   2
  -2  18  -4 5857.83 676.921   2
   2  18  -4 4753.17 622.192   2
  -2  18  -3 1264.41 420.438   2
   2  18  -3 1938.74 442.979   2
  -2  18  -2 376.397 362.210   2
   2  18  -2-36.5684 302.617   2
   2  18  -1 1217.96 365.127   2
  -2  18  -1 1190.68 408.781   2
   2  18   0 7073.48 692.646   2
  -2  18   0 6880.71 723.206   2
   2  18   1 2159.86 418.950   2
   2  20   0 2192.78 455.518   2
  -3  -1  -4 15631.4 478.773   3
   3   1  -4 15794.1 503.264   3
  -3  -1  -3 751.439 96.3025   3
   3   1  -3 599.806 100.899   3
  -3  -1  -3 774.130 121.241   1
  -3   1  -3 757.041 105.646   3
  -3  -1  -2 9570.54 273.915   3
   3   1  -2 9723.44 294.839   3
  -3  -1  -2 9936.36 340.069   1
  -3  -1  -1 557.807 80.8920   1
  -3   1  -1 527.831 70.4589   2
  -3   1  -1 522.814 58.5999   1
  -3   1   0 15149.3 364.885   2
   3  -1   0 15550.0 383.237   2
   3   1   1 2802.10 162.642   1
   3  -1   1 2630.53 122.340   1
  -3  -1   1 3073.60 124.048   3
  -3  -1   2 9621.59 288.598   3
   3   1   2 8793.25 314.122   1
  -3   1   3 602.880 100.309   3
  -3  -1   3 559.604 96.2160   3
   3   1   3 808.340 102.438   3
   3   1   4 15828.1 492.613   3
  -3   1   4 15960.2 516.044   3
  -3  -1   4 15912.4 507.445   3
  -3   1   5 47331.6 1116.33   3
   3   1   5 47769.6 1093.93   3
  -3  -1   5 46998.0 1104.34   3
  -3   1   6 5841.45 363.691   3
  -3  -1   6 5406.36 353.221   3
   3   1   6 5738.08 344.763   3
  -3   1   7 12825.7 575.942   3
   3   1   7 12961.4 574.884   3
  -3  -1   7 12978.2 583.643   3
  -3   1   8 3277.47 327.912   3
  -3  -1   8 4058.85 352.558   3
   3   1   8 4127.81 349.942   3
  -3  -1   9 19554.0 837.683   3
   3   1   9 20931.4 854.790   3
  -3   1   9 18545.7 826.185   3
  -3   1  10 3780.69 407.335   3
   3   1  10 4584.55 448.402   3
  -3  -1  10 3683.28 412.179   3
   3   1  11 13948.4 789.980   3
  -3   1  11 14176.9 796.944   3
  -3  -1  11 12762.3 758.649   3
  -3   1  12 1998.91 366.336   3
   3   1  12 1303.37 328.314   3
  -3  -1  12 1088.66 313.941   3
  -3  -1  13 3499.32 488.253   3
  -3   1  13 2783.41 448.640   3
  -3  -3  -4 22135.4 581.784   3
  -3  -3  -3 2565.09 202.435   1
  -3  -3  -3 2397.12 146.612   3
   3   3  -3 2486.01 171.193   3
  -3  -3  -2 23647.2 641.766   1
   3   3  -2 23583.1 528.873   3
  -3  -3  -2 23335.0 481.876   3
  -3  -3  -1 59569.4 1047.46   2
  -3   3  -1 58015.2 1216.92   2
   3  -3  -1 57763.7 1198.60   2
   3   3  -1 59362.6 985.736   3
  -3   3   0 34503.3 817.895   2
   3   3   0 34906.7 699.125   2
   3  -3   0 34178.5 832.024   2
   3   3   1 62325.6 1065.28   2
  -3  -3   1 60134.6 1010.96   3
   3   3   1 59913.7 1232.84   1
   3   3   2 12900.9 443.751   1
  -3  -3   2 14056.9 368.702   3
   3   3   2 14078.0 333.180   3
  -3  -3   3 2649.83 174.887   3
   3   3   3 2453.88 154.761   3
  -3  -3   4 22698.2 637.499   3
   3   3   4 22433.9 600.021   3
  -3   3   4 21713.7 658.500   3
  -3  -3   5 2700.59 228.118   3
  -3   3   5 2410.49 226.176   3
   3   3   5 2503.70 211.544   3
   3   3   6 31159.3 870.308   3
  -3   3   6 30564.5 917.223   3
  -3  -3   6 30863.9 905.649   3
  -3  -3   7 4255.88 336.969   3
   3   3   7 4832.08 337.975   3
  -3   3   7 4518.14 354.383   3
  -3   3   8 16394.5 727.531   3
   3   3   8 16750.1 704.167   3
  -3  -3   8 16973.5 726.737   3
  -3  -3   9 3051.54 347.591   3
   3   3   9 3155.79 332.414   3
  -3   3   9 3088.70 351.593   3
  -3  -3  10 7603.56 556.115   3
   3   3  10 8100.37 556.294   3
  -3   3  10 7514.49 560.571   3
  -3   3  11 3756.12 451.263   3
  -3  -3  11 4953.14 490.336   3
   3   3  11 4610.52 460.987   3
  -3  -3  12 6982.90 606.912   3
  -3   3  12 7168.94 630.540   3
   3   3  12 6948.80 602.649   3
   3   3  13-167.255 309.717   3
  -3   3  13 291.089 335.417   3
  -3  -3  13-85.6273 299.433   3
   3   3  14 9111.67 776.681   3
  -3  -5  -3 37911.7 879.384   2
   3   5  -3 37478.2 842.589   3
   3   5  -2 46020.1 897.420   3
  -3  -5  -2 46032.7 992.510   2
  -3   5  -2 44251.0 1141.84   2
  -3  -5  -2 44491.3 1077.81   1
   3  -5  -1 21957.3 708.058   2
  -3   5  -1 22155.8 725.817   2
  -3  -5  -1 22833.6 605.255   2
   3  -5  -1 21465.7 419.173   1
   3   5  -1 22153.3 471.435   3
   3   5   0 3981.29 249.500   2
  -3   5   0 4168.46 298.063   2
   3  -5   0 4071.29 286.768   2
   3   5   1 18800.8 613.530   1
   3   5   1 18020.9 554.262   2
  -3   5   1 19929.8 647.549   2
   3   5   2 43220.2 793.086   3
   3   5   2 42525.2 1010.85   1
   3   5   3 36137.5 759.238   3
   3   5   3 35295.9 913.059   1
   3   5   4 9811.15 367.950   3
  -3  -5   4 10404.7 421.312   3
   3   5   5 2314.03 198.907   3
  -3   5   5 2554.96 242.528   3
  -3  -5   5 2456.66 226.250   3
  -3   5   6 13865.6 596.424   3
   3   5   6 13579.4 543.233   3
  -3  -5   6 14138.4 589.439   3
  -3  -5   7 9604.56 516.430   3
   3   5   7 8867.14 467.093   3
  -3   5   7 8257.47 492.576   3
   3   5   8 8883.86 514.849   3
  -3  -5   8 8685.30 536.067   3
  -3   5   8 8802.48 541.760   3
  -3  -5   9 12437.9 679.753   3
  -3   5   9 12662.6 694.982   3
   3   5   9 14349.1 683.384   3
   3   5  10 3582.04 395.275   3
  -3   5  10 4060.10 447.384   3
  -3  -5  10 3291.92 382.260   3
  -3   5  11 3651.22 449.762   3
   3   5  11 4233.95 451.386   3
  -3   5  12 3459.14 483.731   3
   3   5  12 3295.58 420.812   3
   3   5  13 4573.63 532.508   3
  -3   5  13 3747.73 493.883   3
   3   5  14 584.092 303.714   3
   3  -7  -4 8597.63 377.522   1
  -3   7  -3 17110.1 728.922   2
   3  -7  -3 18687.1 524.929   1
   3   7  -3 17456.0 532.213   3
   3  -7  -2 7907.44 273.894   1
  -3  -7  -2 6753.63 367.659   2
   3   7  -2 7690.34 298.250   3
  -3   7  -2 7828.49 479.307   2
  -3   7  -1 18437.8 747.878   2
   3   7  -1 18555.2 672.505   2
  -3  -7  -1 18953.0 636.032   2
   3   7   0 12211.9 534.947   2
  -3   7   0 11246.3 249.199   1
  -3   7   0 11752.7 580.122   2
   3   7   1 22146.5 749.380   2
  -3   7   1 24986.4 858.877   2
   3   7   1 25548.4 784.471   1
   3   7   2 8653.10 284.043   3
   3   7   2 8089.36 404.373   1
   3   7   3 18495.0 650.421   1
   3   7   3 19300.6 515.791   3
   3   7   4 7185.32 318.584   3
   3   7   5 8160.62 375.031   3
  -3   7   5 7627.45 444.088   3
   3   7   6 3778.25 283.938   3
  -3   7   6 4534.55 361.394   3
  -3   7   7 20923.1 831.163   3
   3   7   7 21026.0 751.313   3
  -3   7   8 5029.77 440.532   3
   3   7   8 5211.63 392.498   3
   3   7   9 4708.73 410.412   3
  -3   7   9 4313.12 425.516   3
   3   7  10 3865.06 404.934   3
  -3   7  10 3477.36 405.106   3
   3   7  11 3973.17 440.746   3
  -3   7  11 3752.18 449.189   3
  -3   7  12 2228.04 401.965   3
   3   7  12 3921.44 446.891   3
   3   7  13 2448.59 431.192   3
  -3   7  13 1453.48 343.900   3
  -3   9  -4 14930.5 764.468   2
   3  -9  -3 1919.67 172.479   1
  -3   9  -3 1979.08 287.684   2
   3   9  -2 13149.0 444.731   3
  -3   9  -2 11728.9 663.287   2
   3   9  -2 12502.7 632.596   2
  -3   9  -1 1226.46 258.171   2
   3   9  -1 1165.58 207.777   2
   3   9   0 15460.5 706.973   2
  -3   9   0 15082.4 356.818   1
  -3   9   0 15691.5 751.872   2
   3   9   0 16220.3 672.551   1
   3   9   1 660.745 145.510   1
   3   9   1 655.258 162.914   2
  -3   9   1 671.179 190.153   2
   3   9   2 14358.9 594.931   1
   3   9   2 12720.5 601.622   2
   3   9   3 2585.59 257.854   1
   3   9   3 2393.99 184.166   3
   3   9   4 11079.0 426.179   3
   3   9   5 2759.70 226.774   3
   3   9   6 28587.3 854.231   3
  -3   9   6 26894.8 969.282   3
   3   9   7 898.149 189.582   3
  -3   9   7 1179.60 247.022   3
  -3   9   8 1678.35 305.623   3
   3   9   8 1538.27 252.375   3
   3   9   9 1409.54 264.376   3
  -3   9   9 1921.54 324.230   3
   3   9  10 2212.66 345.025   3
  -3   9  10 2046.69 339.104   3
  -3   9  11 2337.85 437.779   3
   3   9  11 1733.22 329.956   3
  -3   9  12 2466.45 407.550   3
   3   9  12 2537.56 416.486   3
   3   9  13 717.607 289.497   3
  -3  11  -6 5642.22 550.208   2
  -3  11  -5 766.062 253.546   2
  -3  11  -4 3027.99 394.572   2
   3  11  -4 2826.14 356.182   2
   3  11  -3 16263.4 811.012   2
  -3  11  -3 15942.6 859.210   2
  -3  11  -2 269.371 200.636   2
   3  11  -2 230.015 177.598   2
   3  11  -1 2157.49 304.688   2
  -3  11  -1 2436.30 156.417   1
  -3  11  -1 2590.88 370.846   2
   3  11   0 35377.9 1082.35   1
  -3  11   0 32143.6 1226.97   2
   3  11   0 33578.9 1169.38   2
  -3  11   0 30660.0 651.799   1
   3  11   1 2555.49 325.713   2
  -3  11   1 2261.48 311.081   2
   3  11   1 1941.42 236.503   1
   3  11   2 1365.09 208.503   1
   3  11   2 1297.07 229.127   2
   3  11   3 16715.0 539.466   3
   3  11   3 16604.6 690.525   1
   3  11   4 1782.74 190.603   3
   3  11   5 2115.05 218.688   3
  -3  11   6 4782.70 416.885   3
   3  11   6 4946.72 336.889   3
   3  11   7 1904.83 255.498   3
  -3  11   7 1888.35 311.755   3
  -3  11   8 219.273 217.833   3
   3  11   8 556.455 176.889   3
  -3  11   9 2278.37 369.150   3
   3  11   9 1369.65 269.727   3
  -3  11  10 3660.67 462.563   3
   3  11  10 3328.49 398.386   3
  -3  11  11 1909.90 389.342   3
  -3  11  12 3981.91 517.973   3
  -3  13  -9 12001.8 929.390   2
  -3  13  -8 1192.88 407.921   2
  -3  13  -7 3078.24 488.773   2
  -3  13  -6 169.179 235.342   2
   3  13  -6 240.244 233.473   2
   3  13  -5 6588.89 591.038   2
  -3  13  -5 6958.65 647.105   2
  -3  13  -4 1725.84 354.826   2
   3  13  -4 1824.48 334.788   2
  -3  13  -3 3417.80 456.447   2
   3  13  -3 4064.98 450.203   2
  -3  13  -2 1924.75 340.656   2
   3  13  -2 1312.25 283.241   2
   3  13  -1 7415.23 500.451   1
   3  13  -1 6133.54 543.713   2
  -3  13  -1 6634.69 595.812   2
  -3  13   0-210.075 191.817   2
   3  13   0 159.908 157.576   1
   3  13   0 147.698 219.513   2
  -3  13   1 2659.36 400.911   2
   3  13   1 2840.09 357.471   2
   3  13   1 2771.61 305.898   1
   3  13   2 2361.42 285.828   1
   3  13   3 5806.82 326.412   3
   3  13   3 5891.91 427.426   1
  -3  13   6 473.575 219.997   3
  -3  13   7 2715.65 372.696   3
  -3  13   8 1737.58 338.707   3
  -3  13   9 13378.7 816.617   3
  -3  13  10 396.147 309.262   3
  -3  13  11 1573.77 369.306   3
  -3  15  -8 3823.24 579.964   2
   3  15  -8 3304.76 513.307   2
   3  15  -7 3234.73 521.095   2
  -3  15  -7 3026.29 494.021   2
  -3  15  -6 4619.66 576.156   2
   3  15  -6 5271.16 584.140   2
  -3  15  -5-115.019 275.137   2
   3  15  -5 52.5790 227.034   2
  -3  15  -4 5243.81 595.339   2
   3  15  -4 4778.15 549.619   2
  -3  15  -3 1618.11 340.304   2
   3  15  -3 1648.24 341.785   2
   3  15  -2 4544.29 514.951   2
  -3  15  -2 4372.52 546.532   2
   3  15  -2 4138.21 406.965   1
   3  15  -1 1289.22 237.505   1
   3  15  -1 1218.11 304.271   2
  -3  15  -1 1432.88 337.392   2
   3  15   0 1822.17 266.723   1
  -3  15   0 2004.73 390.045   2
   3  15   0 1997.56 379.235   2
  -3  15   1 449.009 230.268   2
   3  15   1 1100.41 297.589   2
   3  15   1 526.677 170.514   1
   3  15   2 1366.01 222.088   1
  -3  15   6 4161.81 442.809   3
  -3  15   7 2154.43 343.499   3
  -3  15   8 4069.25 465.649   3
  -3  15   9 1860.56 398.405   3
   3  17  -6 2214.00 433.847   2
   3  17  -5 6016.28 659.786   2
  -3  17  -5 6035.12 712.033   2
  -3  17  -4 2354.79 493.968   2
   3  17  -4 2325.50 453.054   2
  -3  17  -3 105.932 310.045   2
   3  17  -3 251.812 287.143   2
   3  17  -2 3490.91 492.261   2
  -3  17  -2 3336.20 528.027   2
  -3  17  -1 1374.18 397.739   2
   3  17  -1 928.904 294.211   2
  -3  17   0 3252.89 525.305   2
   3  17   0 4641.52 554.703   2
   3  17   1 2008.81 391.429   2
  -3  17   1 1908.01 435.788   2
   3  19  -3 2287.11 485.077   2
   3  19  -2 1217.38 398.119   2
   3  19  -1 3978.58 529.494   2
   3  19   0-212.588 265.915   2
  -4   0  -4 63717.3 1283.87   3
  -4   0  -3-60.5638 57.2170   1
  -4   0  -3 10.0655 59.9530   3
  -4   0  -2 5892.63 259.629   1
  -4   0  -1-4.89652 28.7648   2
  -4   0  -1 59.6401 62.0551   1
   4   0   0 138106. 2160.17   2
   4   0   1 66.8814 59.4688   1
   4   0   2 13216.3 399.292   1
  -4   0   3 94.2882 76.4467   3
  -4   0   4 60649.9 1267.78   3
  -4   0   5 32.0631 94.5343   3
  -4   0   6 44363.4 1138.78   3
  -4   0   7-30.3898 120.452   3
  -4   0   8 7379.35 477.154   3
  -4   0   9 172.082 186.476   3
  -4   0  10 23223.3 975.800   3
  -4   0  11 150.556 218.295   3
  -4   0  12 7914.23 628.367   3
  -4   0  13-114.293 264.774   3
  -4  -2  -4 3805.12 217.783   3
   4   2  -3 17151.0 482.520   3
  -4  -2  -3 16362.1 437.134   3
  -4  -2  -3 16683.5 550.633   1
  -4  -2  -2 17250.7 524.889   1
   4   2  -2 17028.0 425.036   3
  -4   2  -2 16448.5 435.926   1
  -4  -2  -2 16247.7 382.822   3
  -4   2  -1 64456.9 1114.34   1
   4  -2  -1 63324.9 1234.00   2
  -4   2  -1 62764.5 1233.92   2
  -4   2   0 14297.2 421.187   2
   4  -2   0 13978.9 439.082   2
   4  -2   1 50118.2 1013.66   2
   4   2   1 48240.9 1054.42   1
  -4  -2   1 48364.6 846.505   3
   4  -2   1 47805.5 867.737   1
   4   2   2 20800.5 598.387   1
  -4  -2   2 22116.1 504.139   3
  -4  -2   3 20817.3 553.258   3
   4   2   3 21070.5 526.992   3
  -4   2   4 2966.27 224.979   3
   4   2   4 2811.05 190.580   3
  -4  -2   4 2713.91 206.465   3
  -4  -2   5 16531.3 572.277   3
   4   2   5 16464.6 547.426   3
  -4   2   5 15524.5 584.946   3
  -4   2   6 20688.0 733.323   3
  -4  -2   6 21672.5 730.477   3
   4   2   6 21344.4 704.936   3
  -4  -2   7 11642.7 552.572   3
   4   2   7 11543.4 536.918   3
  -4   2   7 10863.5 551.065   3
  -4  -2   8 2100.89 274.814   3
  -4   2   8 2225.43 287.346   3
   4   2   8 1911.31 265.087   3
  -4  -2   9 30507.8 1069.44   3
  -4   2   9 28218.3 1046.48   3
   4   2   9 29904.4 1059.38   3
  -4   2  10 3819.77 414.907   3
   4   2  10 3667.63 408.745   3
  -4  -2  10 4169.47 418.146   3
  -4   2  11 2909.21 402.815   3
  -4  -2  11 3272.01 402.244   3
   4   2  11 2970.89 395.864   3
  -4  -2  12 4939.87 517.075   3
  -4   2  12 5407.23 556.693   3
  -4  -2  13 6091.05 621.624   3
  -4   2  13 6172.81 615.593   3
  -4  -4  -4 16371.1 478.089   3
   4   4  -3 39943.6 862.635   3
  -4  -4  -3 39483.3 793.859   3
   4   4  -2 9514.12 298.932   3
  -4   4  -2 9880.27 438.515   2
  -4  -4  -2 9886.53 431.677   1
  -4  -4  -2 9712.22 315.311   2
  -4  -4  -2 9688.67 247.956   3
   4   4  -1 13359.0 303.255   3
  -4   4  -1 13169.3 288.692   1
   4  -4  -1 12754.7 494.152   2
  -4  -4  -1 13726.2 380.358   2
  -4   4  -1 12867.0 514.375   2
   4   4   0 7459.88 288.422   2
  -4   4   0 6901.06 356.342   2
   4  -4   0 6886.10 358.272   2
   4  -4   1 15460.7 563.007   2
   4   4   1 15966.2 569.736   1
  -4   4   1 16124.9 552.959   2
   4   4   1 16434.2 429.100   2
   4   4   2 7626.73 212.486   3
  -4  -4   2 7194.22 255.152   3
   4   4   2 7860.17 369.013   1
  -4  -4   3 40446.5 869.102   3
   4   4   3 40520.1 807.689   3
   4   4   3 37999.4 981.263   1
   4   4   4 14384.2 447.650   3
  -4  -4   4 13459.8 474.255   3
   4   4   5 13734.6 484.415   3
  -4   4   5 12446.7 537.800   3
  -4  -4   5 13513.2 515.416   3
   4   4   6 13155.5 519.402   3
  -4   4   6 12906.8 573.638   3
  -4  -4   6 12203.1 537.833   3
  -4   4   7 22144.2 827.600   3
  -4  -4   7 22303.6 805.315   3
   4   4   7 22629.9 772.992   3
   4   4   8 2696.93 281.612   3
  -4  -4   8 2975.45 327.405   3
  -4   4   8 2727.81 325.755   3
   4   4   9 12091.9 619.857   3
  -4   4   9 9713.02 612.181   3
  -4  -4   9 10493.6 609.516   3
  -4  -4  10 2271.05 356.477   3
  -4   4  10 1227.85 269.358   3
   4   4  10 1791.99 312.364   3
  -4   4  11 6888.26 598.389   3
   4   4  11 6993.75 556.152   3
  -4  -4  11 6196.81 546.589   3
   4   4  12 786.895 279.371   3
  -4  -4  12 203.159 266.956   3
  -4   4  12 144.879 210.406   3
  -4   4  13 5103.43 567.293   3
   4   4  13 5839.72 597.342   3
  -4  -4  13 5424.63 610.399   3
  -4  -6  -4 15248.2 539.805   2
  -4   6  -3 14808.1 636.049   2
   4   6  -3 14119.6 456.650   3
  -4  -6  -3 15725.0 523.653   2
  -4   6  -2 76618.5 1779.74   2
   4  -6  -2 79815.2 1357.34   1
   4   6  -2 79052.6 1412.92   3
  -4  -6  -2 79246.2 1560.96   2
  -4  -6  -1 2498.39 192.693   2
  -4   6  -1 2536.93 271.654   2
   4   6  -1 2014.51 195.783   2
   4   6  -1 2429.93 123.139   3
  -4   6   0 22895.5 793.111   2
   4   6   0 22688.7 429.559   3
   4   6   0 22201.4 688.354   2
   4   6   1 2928.70 251.962   1
  -4   6   1 2916.64 268.872   2
   4   6   1 2501.24 205.030   2
   4   6   1 2860.09 103.779   3
   4   6   2 73559.4 1230.26   3
   4   6   2 72170.1 1586.27   1
   4   6   3 16592.0 616.064   1
   4   6   3 16646.1 433.866   3
   4   6   4 15303.5 466.906   3
   4   6   5 12842.3 473.014   3
  -4   6   5 12981.9 577.887   3
   4   6   6 8372.83 407.349   3
  -4   6   6 8562.98 488.563   3
  -4  -6   6 8399.31 447.713   3
   4   6   7 1431.03 211.487   3
  -4  -6   7 1469.16 233.361   3
  -4   6   7 1109.54 238.951   3
   4   6   8 11997.0 583.401   3
  -4  -6   8 12504.1 646.272   3
  -4   6   8 13000.9 683.639   3
   4   6   9 921.726 199.776   3
  -4  -6   9 1093.98 254.349   3
  -4   6   9 808.924 249.594   3
  -4   6  10 2190.01 350.425   3
   4   6  10 2078.00 313.320   3
  -4   6  11 187.818 255.701   3
   4   6  11 605.642 247.470   3
   4   6  12 4789.34 515.345   3
  -4   6  12 4148.69 506.573   3
  -4   6  13 1934.34 429.492   3
   4   6  13 2359.57 432.575   3
   4   6  14 2308.98 457.518   3
  -4   8  -4 5867.75 460.731   2
   4  -8  -4 5698.81 303.342   1
   4  -8  -3 14030.4 428.845   1
   4   8  -3 13457.7 461.637   3
  -4   8  -3 13642.6 688.180   2
   4  -8  -2 25156.6 569.624   1
   4   8  -2 23632.1 830.789   2
   4   8  -2 25570.4 621.764   3
  -4   8  -2 25166.8 953.650   2
   4   8  -1 61661.9 1488.97   2
  -4   8  -1 60692.6 1015.54   1
  -4   8  -1 60629.9 1637.17   2
   4   8  -1 61412.8 1125.85   3
  -4   8   0 21847.7 867.445   2
   4   8   0 21743.3 781.800   2
   4   8   1 67263.1 1573.97   1
   4   8   1 60897.8 1494.02   2
  -4   8   1 65530.5 1657.42   2
   4   8   2 24964.3 848.739   1
   4   8   2 26369.3 565.910   3
   4   8   3 13504.3 397.708   3
   4   8   3 12459.5 569.835   1
   4   8   4 4364.08 243.313   3
   4   8   5 9749.15 408.657   3
  -4   8   6 4240.86 370.383   3
   4   8   6 3935.23 286.737   3
   4   8   7 4752.61 343.021   3
  -4   8   7 4804.00 419.225   3
   4   8   8 2882.42 296.103   3
  -4   8   8 2714.23 355.005   3
   4   8   9 4240.02 395.172   3
  -4   8   9 4948.04 471.787   3
   4   8  10 692.604 228.259   3
  -4   8  10 62.2658 227.183   3
   4   8  11 8524.06 607.806   3
  -4   8  11 7687.78 651.740   3
  -4   8  12 1814.13 433.080   3
   4   8  12 1916.81 354.867   3
   4   8  13 267.601 290.792   3
  -4  10  -6 5290.69 512.902   2
  -4  10  -5 25289.2 1091.94   2
   4 -10  -4 3198.46 237.283   1
  -4  10  -4 3601.97 402.047   2
   4  10  -3 12467.8 654.694   2
  -4  10  -3 10801.1 676.753   2
   4  10  -2 16870.3 527.246   3
   4  10  -2 17811.6 779.636   2
  -4  10  -2 17852.7 867.262   2
   4  10  -1 16280.6 746.428   2
  -4  10  -1 15098.7 337.673   1
   4  10  -1 15598.6 456.336   3
  -4  10  -1 15829.2 813.861   2
   4  10   0-23.8295 134.718   2
  -4  10   0 92.8458 132.888   2
   4  10   0 288.333 148.118   1
   4  10   1 18284.4 752.627   1
   4  10   1 17620.9 766.044   2
  -4  10   1 18111.1 849.040   2
   4  10   2 19472.5 749.067   1
   4  10   2 17037.4 734.283   2
   4  10   3 10149.4 368.381   3
   4  10   3 9783.32 536.320   1
   4  10   4 4093.46 248.546   3
   4  10   5 23885.1 709.528   3
  -4  10   6 6560.99 490.932   3
   4  10   6 7320.20 396.252   3
   4  10   7 7182.35 429.851   3
  -4  10   7 7426.54 535.923   3
  -4  10   8 2007.82 310.319   3
   4  10   8 2090.03 273.467   3
   4  10   9 3075.25 342.896   3
  -4  10   9 2781.29 389.097   3
   4  10  10 110.921 177.717   3
  -4  10  10 561.339 302.325   3
   4  10  11 4322.23 463.880   3
  -4  10  11 5371.87 574.621   3
  -4  10  12 1645.65 373.855   3
  -4  12  -8 9696.64 784.697   2
  -4  12  -7 560.411 266.825   2
  -4  12  -6 8171.83 679.602   2
   4  12  -5 6270.46 552.599   2
  -4  12  -5 6442.48 610.795   2
   4  12  -4 7795.47 592.152   2
  -4  12  -4 7922.92 636.498   2
  -4  12  -3 191.278 192.648   2
   4  12  -3 677.935 242.856   2
   4  12  -2 12375.7 707.373   2
  -4  12  -2 12403.2 783.879   2
  -4  12  -2 12333.4 387.768   1
  -4  12  -1 2517.21 380.012   2
   4  12  -1 1796.00 296.444   2
  -4  12   0 6932.51 579.946   2
   4  12   0 6324.48 505.538   2
   4  12   0 7267.00 490.335   1
  -4  12   1 843.612 250.136   2
   4  12   1 1349.06 233.275   1
   4  12   1 1443.57 281.503   2
   4  12   2 8498.32 511.172   1
   4  12   2 6807.20 505.100   2
   4  12   3 273.970 155.934   1
   4  12   3 124.936 80.9719   3
   4  12   4 7769.93 362.479   3
   4  12   5 5058.75 311.577   3
  -4  12   6 8345.83 585.994   3
  -4  12   7-50.0505 213.503   3
  -4  12   8 12491.9 762.595   3
  -4  12   9 3583.43 447.176   3
  -4  12  10 5073.91 553.564   3
  -4  12  11 255.774 276.960   3
  -4  14  -9 2986.41 550.013   2
  -4  14  -8 3881.16 578.168   2
  -4  14  -7 4178.32 582.000   2
   4  14  -7 3895.29 540.768   2
  -4  14  -6 3847.74 534.427   2
   4  14  -6 3081.75 456.507   2
  -4  14  -5 2426.99 457.254   2
   4  14  -5 3404.98 489.291   2
  -4  14  -4 5298.31 573.104   2
   4  14  -4 5972.26 562.566   2
   4  14  -3 3560.83 432.524   2
  -4  14  -3 3526.07 475.614   2
   4  14  -2 8110.04 634.321   2
  -4  14  -2 8717.01 724.630   2
  -4  14  -1 1567.98 383.805   2
   4  14  -1 1067.87 262.382   2
   4  14  -1 1368.81 268.079   1
   4  14   0 8072.84 536.134   1
  -4  14   0 7620.82 666.791   2
   4  14   0 9794.37 684.094   2
  -4  14   1 296.716 239.997   2
   4  14   1 473.631 182.125   1
   4  14   1 196.864 171.454   2
   4  14   2 6700.03 488.639   1
   4  14   3 4523.09 409.469   1
  -4  14   6 1580.23 336.235   3
  -4  14   7 2433.35 368.772   3
  -4  14   8 4537.59 501.414   3
  -4  14   9 4105.54 500.671   3
  -4  14  10 1395.60 375.322   3
   4  16  -7 1502.07 381.996   2
  -4  16  -6 205.295 317.770   2
   4  16  -6 318.839 307.574   2
  -4  16  -5 6114.09 678.046   2
   4  16  -5 6381.12 650.315   2
  -4  16  -4 952.082 356.322   2
   4  16  -4 189.567 240.481   2
   4  16  -3 3669.52 504.196   2
  -4  16  -3 2954.62 480.948   2
  -4  16  -2 3933.20 547.328   2
   4  16  -2 3325.39 450.660   2
  -4  16  -1 5598.49 639.742   2
   4  16  -1 5565.73 575.448   2
  -4  16   0 1713.52 363.841   2
   4  16   0 1913.43 361.764   2
   4  16   1 4494.44 504.983   2
  -4  16   1 5331.05 591.269   2
  -4  16   6 479.766 231.540   3
  -4  16   7 883.633 298.371   3
   4  18  -5 950.101 391.423   2
   4  18  -4 2035.74 417.534   2
  -4  18  -3 818.286 372.318   2
   4  18  -3 614.033 257.648   2
   4  18  -2 533.503 260.477   2
  -4  18  -2 936.336 357.167   2
  -4  18  -1 2003.13 439.784   2
   4  18  -1 1923.70 386.649   2
   4  18   0 7110.26 661.755   2
  -4  18   0 6673.99 706.958   2
   4  20  -1 785.830 289.182   2
   4  20   0 1698.74 455.879   2
  -5  -1  -4 8122.01 335.395   3
  -5  -1  -3 4572.72 271.714   1
  -5   1  -3 4121.56 242.301   1
  -5  -1  -3 3965.40 206.249   3
  -5  -1  -2 3967.41 245.243   1
  -5   1  -2 4076.90 217.753   1
  -5   1  -1 14942.6 441.596   1
  -5   1  -1 14704.5 406.987   2
   5  -1   0 1860.72 135.012   2
   5  -1   1 12382.7 370.154   2
   5  -1   1 12553.3 378.571   1
   5   1   1 12460.6 439.607   1
  -5  -1   2 2706.62 161.606   3
   5   1   2 2616.20 194.970   1
   5  -1   2 2750.32 173.681   1
  -5  -1   3 3959.31 223.537   3
  -5  -1   4 6559.58 323.073   3
  -5   1   4 6554.21 338.238   3
  -5   1   5 42804.2 1070.65   3
  -5  -1   5 42692.3 1050.47   3
  -5   1   6 10198.8 494.817   3
  -5  -1   6 9271.84 467.581   3
  -5   1   7 19470.8 747.288   3
  -5  -1   7 19303.9 740.644   3
  -5  -1   8 4168.16 366.626   3
  -5   1   8 4868.47 399.465   3
  -5   1   9 16575.8 781.612   3
  -5  -1   9 17909.1 802.759   3
  -5  -1  10 4615.18 456.158   3
  -5   1  10 4923.55 455.606   3
  -5   1  11 11804.3 737.689   3
  -5  -1  11 11568.9 728.188   3
  -5   1  12 1533.50 341.948   3
  -5  -1  12 1292.71 331.189   3
  -5  -1  13 3532.36 492.646   3
  -5   1  13 3222.11 458.348   3
  -5  -3  -4 44275.6 940.008   3
   5   3  -3 3821.25 218.059   3
  -5  -3  -3 4167.04 189.015   3
  -5  -3  -2 29624.4 582.045   3
  -5  -3  -2 30584.7 842.230   1
   5   3  -2 30374.4 650.352   3
  -5   3  -2 30170.2 664.215   1
  -5  -3  -2 30159.2 571.325   2
  -5   3  -2 30451.8 813.815   2
  -5   3  -1 30929.4 636.976   1
  -5  -3  -1 29676.9 518.473   3
   5  -3  -1 31687.1 800.165   2
  -5   3  -1 31413.9 805.764   2
   5  -3   0 1674.00 99.8889   1
   5  -3   0 1356.90 151.728   2
  -5   3   0 1908.33 172.994   2
   5  -3   1 31545.8 830.606   2
  -5  -3   1 31395.6 589.520   3
   5   3   1 29066.8 846.627   1
  -5  -3   2 28417.0 608.952   3
   5   3   2 26172.9 769.448   1
   5   3   3 4197.97 282.100   1
  -5  -3   3 4432.50 230.119   3
   5   3   4 48418.5 1019.73   3
  -5  -3   4 47634.6 1061.59   3
  -5   3   5 8094.21 419.238   3
   5   3   5 8334.38 381.251   3
  -5  -3   5 8056.75 395.862   3
  -5   3   6 5786.26 391.103   3
   5   3   6 6044.69 359.985   3
  -5  -3   6 6159.98 373.624   3
  -5  -3   7 4086.36 342.350   3
  -5   3   7 3220.99 322.476   3
   5   3   7 3815.91 311.503   3
  -5  -3   8 12480.1 623.195   3
   5   3   8 12084.4 597.329   3
  -5   3   8 10980.0 600.968   3
  -5  -3   9 3482.70 362.124   3
  -5   3   9 2336.47 305.908   3
   5   3   9 3802.10 373.543   3
  -5  -3  10 10398.5 648.218   3
  -5   3  10 10529.5 661.075   3
   5   3  10 11371.4 664.833   3
  -5  -3  11 4038.92 451.808   3
  -5   3  11 3655.52 445.109   3
   5   3  11 3514.09 414.859   3
  -5  -3  12 2194.85 398.386   3
  -5   3  12 2453.77 389.145   3
  -5   3  13 2469.44 434.269   3
  -5  -3  13 2035.76 405.233   3
  -5  -5  -4 4119.76 212.625   3
  -5  -5  -3 15853.8 394.873   3
  -5   5  -3 14805.8 614.980   2
   5   5  -3 14489.8 455.271   3
  -5  -5  -3 15212.0 465.056   2
   5   5  -2 89746.6 1523.78   3
  -5  -5  -2 88249.4 1590.68   2
  -5   5  -2 88550.2 1497.88   1
  -5   5  -2 84541.9 1866.17   2
  -5   5  -1 48414.1 827.912   1
   5   5  -1 48689.0 841.378   3
  -5   5  -1 47949.0 1230.15   2
   5   5   0 18702.5 547.201   2
  -5   5   0 19436.4 682.831   2
   5   5   1 37264.4 1069.57   1
   5   5   1 38635.3 853.013   2
  -5   5   1 40703.4 1050.23   2
   5   5   2 85602.8 1866.63   1
   5   5   2 90131.0 1444.87   3
  -5  -5   2 92362.0 1558.00   3
   5   5   3 14498.9 386.728   3
   5   5   3 14013.2 576.041   1
  -5  -5   3 14505.0 443.564   3
   5   5   4 2722.04 182.719   3
  -5  -5   4 3061.90 217.634   3
  -5  -5   5 9497.06 429.483   3
  -5   5   5 9429.95 491.819   3
   5   5   5 9973.21 399.336   3
   5   5   6 5986.22 339.931   3
  -5  -5   6 5815.57 374.000   3
  -5   5   6 5919.14 417.344   3
  -5   5   7 10788.5 592.011   3
  -5  -5   7 10818.5 543.031   3
   5   5   7 11107.1 515.041   3
   5   5   8 16369.3 685.676   3
  -5   5   8 15458.6 749.521   3
  -5  -5   8 16192.8 721.129   3
  -5   5   9 2839.91 361.189   3
  -5  -5   9 3211.12 375.085   3
   5   5   9 2467.05 300.022   3
  -5   5  10 209.725 196.725   3
  -5  -5  10 449.104 219.540   3
   5   5  10 1.09175 167.862   3
  -5  -5  11 360.351 260.056   3
  -5   5  11 84.3570 218.851   3
   5   5  11 200.552 239.552   3
  -5  -5  12 9192.78 697.741   3
   5   5  12 9774.64 698.873   3
  -5   5  12 11248.5 803.047   3
  -5   5  13 2239.37 405.099   3
  -5  -5  13 2346.68 406.626   3
  -5   7  -4 5098.39 416.569   2
   5   7  -3 62626.6 1243.80   3
  -5  -7  -3 63275.4 1368.28   2
  -5   7  -3 61636.5 1610.59   2
   5  -7  -2 14125.3 347.611   1
  -5   7  -2 14333.0 669.996   2
  -5  -7  -2 14856.2 518.490   2
   5   7  -2 14032.5 398.433   3
  -5   7  -1 43035.5 1278.15   2
   5   7  -1 44348.4 1110.98   2
   5   7  -1 43826.6 802.161   3
   5   7   0 5071.57 321.517   2
  -5   7   0 4569.48 377.290   2
  -5   7   1 42996.5 1205.94   2
   5   7   1 42419.8 1196.24   1
   5   7   1 38227.8 1012.32   2
   5   7   2 16074.3 349.665   3
   5   7   2 16996.2 678.706   1
   5   7   3 62266.7 1514.30   1
   5   7   3 62264.8 1127.60   3
   5   7   4 3222.91 308.892   1
   5   7   4 3332.56 202.253   3
   5   7   5 11285.4 434.804   3
  -5   7   6 3738.62 358.279   3
   5   7   6 4236.89 289.080   3
   5   7   7 16830.9 644.432   3
  -5   7   7 17792.2 791.909   3
   5   7   8 1643.57 234.054   3
  -5   7   8 1671.69 301.544   3
  -5   7   9 10684.6 682.934   3
   5   7   9 10052.6 574.660   3
  -5   7  10 130.996 206.764   3
   5   7  10 217.857 196.405   3
   5   7  11 12336.4 716.228   3
  -5   7  11 11619.7 782.930   3
   5   7  12 652.747 282.604   3
  -5   7  12 437.281 269.338   3
   5   7  13 3896.09 503.294   3
  -5   9  -5 18685.9 899.945   2
  -5   9  -4 21995.5 967.942   2
   5  -9  -4 23888.0 670.345   1
   5   9  -3 1095.58 138.584   3
   5  -9  -3 1197.33 118.247   1
  -5   9  -3 520.752 192.941   2
   5   9  -2 25565.1 636.182   3
   5   9  -2 26498.8 918.939   2
  -5   9  -2 26258.1 1037.91   2
   5   9  -1 3847.54 184.582   3
   5   9  -1 4264.47 346.052   2
  -5   9  -1 4071.33 397.895   2
   5   9   0 37696.6 712.416   3
   5   9   0 37763.1 1135.93   2
  -5   9   0 39484.6 1284.36   2
  -5   9   1 3662.18 374.620   2
   5   9   1 3724.46 322.966   2
   5   9   1 3947.05 352.196   1
   5   9   2 27489.9 565.750   3
   5   9   2 28847.1 972.929   1
   5   9   3 619.330 186.535   1
   5   9   3 661.108 88.4787   3
   5   9   4 17146.2 495.929   3
   5   9   4 16306.5 719.598   1
   5   9   5 17492.5 558.502   3
  -5   9   6 15978.7 767.226   3
   5   9   6 16890.9 595.173   3
  -5   9   7 9043.44 591.940   3
   5   9   7 8090.13 444.630   3
  -5   9   8 5401.38 494.368   3
   5   9   8 5416.49 397.590   3
   5   9   9 2590.12 304.236   3
  -5   9   9 3126.18 414.489   3
  -5   9  10 8848.69 679.219   3
   5   9  10 8230.70 555.322   3
   5   9  11 393.960 225.203   3
  -5   9  11 142.665 276.593   3
   5   9  12 7667.62 614.876   3
  -5   9  12 7872.27 701.981   3
  -5  11  -8 2379.66 440.958   2
  -5  11  -7 14301.3 895.624   2
  -5  11  -6 13274.0 841.294   2
  -5  11  -5 2679.70 404.069   2
  -5  11  -4 35443.0 1344.71   2
  -5  11  -3 8609.47 649.022   2
   5  11  -3 9311.81 595.184   2
   5  11  -2 11277.6 641.466   2
  -5  11  -2 11976.6 738.544   2
  -5  11  -2 11117.8 297.709   1
  -5  11  -1 3211.89 414.530   2
   5  11  -1 2848.01 339.826   2
   5  11   0 22212.2 914.438   1
  -5  11   0 20509.2 980.287   2
   5  11   0 22481.9 917.609   2
  -5  11   1 2847.00 364.923   2
   5  11   1 3449.41 344.957   1
   5  11   1 3625.05 357.152   2
   5  11   2 9359.55 300.196   3
   5  11   2 8698.13 534.918   1
   5  11   3 7603.56 493.717   1
   5  11   3 7127.97 282.989   3
   5  11   4 34405.4 1132.82   1
   5  11   4 33988.8 805.540   3
   5  11   5 1214.65 157.183   3
   5  11   6 13120.7 526.246   3
  -5  11   7 14826.6 799.952   3
  -5  11   8 2390.00 370.529   3
  -5  11   9 1972.10 391.484   3
  -5  11  10 6344.71 600.090   3
  -5  11  11 2365.12 470.494   3
  -5  13  -9 10788.2 885.695   2
  -5  13  -8 2035.70 454.240   2
  -5  13  -7 10294.7 818.022   2
  -5  13  -6 467.191 264.659   2
   5  13  -6 12.9956 172.273   2
   5  13  -5 11778.5 765.083   2
  -5  13  -5 11771.4 829.520   2
  -5  13  -4 301.371 242.362   2
   5  13  -4 3.63415 192.452   2
   5  13  -3 9893.28 664.974   2
  -5  13  -3 9376.70 721.505   2
  -5  13  -2 1475.60 336.478   2
   5  13  -2 1197.80 259.097   2
  -5  13  -1 25841.8 1204.17   2
   5  13  -1 25263.0 1040.95   1
   5  13  -1 27201.7 1114.91   2
   5  13   0 14683.7 744.800   1
  -5  13   0 11922.5 792.662   2
   5  13   0 13953.7 775.646   2
   5  13   1 19813.4 863.015   1
  -5  13   1 20528.1 1039.41   2
   5  13   1 19436.1 911.527   2
   5  13   2 985.857 227.484   1
   5  13   3 10519.7 616.127   1
  -5  13   7 8240.67 617.085   3
  -5  13   8 2273.32 380.452   3
  -5  13   9 12065.3 796.475   3
  -5  13  10 932.951 353.656   3
  -5  13  11 1044.94 380.947   3
   5  15  -8 3176.00 494.488   2
  -5  15  -7 490.951 324.597   2
   5  15  -7 1511.77 369.386   2
  -5  15  -6 5774.32 672.976   2
   5  15  -6 5124.87 576.681   2
  -5  15  -5 25.2324 240.956   2
   5  15  -5-29.0995 244.049   2
   5  15  -4 7434.02 641.372   2
  -5  15  -4 8321.16 768.075   2
  -5  15  -3 6194.98 646.776   2
   5  15  -3 5464.08 556.642   2
  -5  15  -2 2091.60 416.275   2
   5  15  -2 2860.65 426.785   2
  -5  15  -1 2636.49 438.958   2
   5  15  -1 3070.95 406.338   2
   5  15  -1 3340.91 384.755   1
   5  15   0 9250.17 609.219   1
  -5  15   0 9109.22 743.681   2
   5  15   0 9807.58 698.902   2
  -5  15   1 2223.15 422.535   2
   5  15   1 2097.21 325.266   2
   5  15   1 1615.88 281.249   1
   5  15   2 4554.56 435.340   1
   5  15   3 7030.95 517.136   1
  -5  15   7 978.866 302.328   3
  -5  15   8 5381.64 577.183   3
  -5  15   9 1794.41 391.980   3
   5  17  -6 3226.37 534.964   2
  -5  17  -5 2078.46 456.613   2
   5  17  -5 2816.84 479.902   2
  -5  17  -4 3977.02 569.556   2
   5  17  -4 4721.20 573.175   2
  -5  17  -3-9.22339 272.189   2
   5  17  -3 232.365 224.674   2
  -5  17  -2 4424.68 580.691   2
   5  17  -2 4044.28 521.440   2
  -5  17  -1 3763.16 530.613   2
   5  17  -1 3715.17 507.708   2
   5  17   0 3191.57 454.335   2
  -5  17   0 3861.50 552.095   2
   5  17   1 4455.49 524.076   2
  -5  17   6 3304.46 468.547   3
   5  19  -4-286.801 365.017   2
   5  19  -3 2237.08 445.234   2
   5  19  -2 152.565 308.127   2
   5  19  -1 5919.77 642.286   2
   5  19   0-26.6900 266.478   2
  -6   0  -3 31.7160 71.2410   1
  -6   0  -2 29017.1 618.566   2
  -6   0  -2 29719.3 773.212   1
  -6   0  -1 36.6157 41.3115   2
   6   0   0 217130. 3400.02   2
   6   0   1 170.119 90.7546   1
   6   0   2 32695.0 800.829   1
  -6   0   3-45.7265 85.8383   3
  -6   0   4 55689.8 1222.99   3
  -6   0   5 148.514 123.021   3
  -6   0   6 39341.5 1076.73   3
  -6   0   7 28.5655 125.013   3
  -6   0   8 19593.4 804.723   3
  -6   0   9-100.936 181.217   3
  -6   0  10 19860.1 907.359   3
  -6   0  11 245.911 222.048   3
  -6   0  12 4649.61 537.896   3
  -6   0  13-269.370 308.889   3
  -6  -2  -4 17511.5 519.222   3
  -6   2  -3 37303.5 884.765   1
  -6  -2  -3 37228.4 792.678   3
  -6   2  -2 16510.6 494.349   1
  -6  -2  -2 16223.6 591.485   1
  -6   2  -2 17369.4 530.123   2
   6  -2  -1 79490.9 1514.13   2
  -6   2  -1 77278.5 1494.84   2
  -6   2   0 36978.0 837.091   2
   6  -2   0 38755.0 898.916   2
   6  -2   1 67220.0 1214.30   1
   6   2   1 63362.1 1429.67   1
   6  -2   1 63078.0 1317.69   2
   6   2   2 14575.5 542.655   1
  -6  -2   2 14823.7 417.324   3
  -6  -2   3 34080.2 793.407   3
   6   2   3 34251.7 910.181   1
  -6   2   4 14136.8 540.888   3
  -6  -2   4 13730.4 487.431   3
  -6  -2   5 69291.5 1488.47   3
  -6   2   5 68753.5 1539.81   3
  -6  -2   6 21510.6 738.708   3
  -6   2   6 22317.0 777.854   3
  -6   2   7 15040.6 670.417   3
  -6  -2   7 15414.7 649.634   3
  -6  -2   8 607.942 194.537   3
  -6   2   8 382.573 187.642   3
  -6  -2   9 22109.1 907.991   3
  -6   2   9 22496.4 931.496   3
  -6   2  10 4255.56 444.326   3
  -6  -2  10 4609.54 454.407   3
  -6   2  11 2371.42 366.018   3
  -6  -2  11 2191.56 366.278   3
  -6  -2  12 2485.03 415.357   3
  -6   2  12 3278.18 459.496   3
  -6  -2  13 1653.85 399.000   3
  -6   2  13 2236.80 415.211   3
  -6  -4  -4 27296.3 659.687   3
  -6   4  -3 80726.9 1732.17   2
  -6  -4  -3 80309.1 1412.48   3
   6   4  -3 81957.2 1511.09   3
  -6  -4  -3 81992.1 1424.30   2
  -6   4  -3 82020.4 1526.83   1
  -6   4  -2 21221.0 521.855   1
  -6  -4  -2 20807.6 456.147   2
  -6   4  -2 20723.8 697.782   2
  -6  -4  -2 20486.8 423.333   3
  -6   4  -1 46857.0 1156.63   2
   6  -4   0 232.457 109.950   2
   6  -4   0 152.443 38.3346   1
  -6   4   0 238.669 107.957   2
   6   4   1 52277.0 920.278   2
  -6  -4   1 53535.4 900.306   3
   6  -4   1 49856.6 1246.39   2
   6   4   2 17105.2 652.642   1
  -6  -4   2 17571.6 444.845   3
  -6  -4   3 87732.0 1602.93   3
   6   4   3 87161.1 1845.39   1
  -6  -4   4 29262.9 773.263   3
   6   4   4 29959.5 906.698   1
  -6   4   5 7211.57 430.689   3
  -6  -4   5 7472.27 385.505   3
  -6  -4   6 9488.56 468.671   3
  -6   4   6 10091.9 523.508   3
   6   4   6 9004.43 432.713   3
  -6   4   7 27984.3 978.793   3
   6   4   7 29029.1 892.737   3
  -6  -4   7 28425.5 927.048   3
   6   4   8 8382.07 497.496   3
  -6   4   8 7927.70 522.667   3
  -6  -4   8 7520.62 487.336   3
  -6  -4   9 7907.40 537.913   3
   6   4   9 7669.83 505.464   3
  -6   4   9 7268.06 548.104   3
  -6   4  10 1473.92 323.898   3
  -6  -4  10 1322.62 299.110   3
  -6   4  11 3248.85 413.893   3
  -6  -4  11 3897.86 454.212   3
  -6   4  12-104.796 269.780   3
  -6  -4  12 489.753 312.337   3
  -6   4  13 10960.2 812.742   3
  -6  -4  13 9520.75 767.474   3
  -6  -6  -5 1462.09 151.023   3
  -6   6  -4 12971.8 636.098   2
  -6  -6  -4 13151.9 468.871   2
   6   6  -3 7343.54 304.798   3
  -6  -6  -3 7332.36 324.676   2
  -6   6  -3 8064.32 478.662   2
   6   6  -2 65121.8 1178.56   3
  -6   6  -2 65469.2 1152.19   1
  -6  -6  -2 65733.7 1282.77   2
  -6   6  -2 62338.6 1597.75   2
  -6   6  -1 13915.9 635.108   2
  -6   6   0 68643.6 1629.11   2
   6   6   0 67358.1 1392.24   2
  -6   6   1 13477.8 593.276   2
   6   6   1 12490.4 441.173   2
   6   6   1 11743.5 592.717   1
   6   6   2 60914.6 1521.68   1
  -6  -6   3 8077.21 319.117   3
   6   6   3 7292.61 447.172   1
   6   6   4 14187.2 431.535   3
  -6  -6   4 14294.8 496.353   3
   6   6   4 13512.4 618.803   1
  -6  -6   5 2239.65 214.507   3
   6   6   5 2132.13 183.782   3
  -6   6   6 8709.82 529.617   3
  -6  -6   6 9772.47 486.029   3
   6   6   6 9599.11 432.999   3
  -6   6   7 6978.60 509.413   3
  -6  -6   7 8229.88 478.803   3
   6   6   7 7496.28 417.850   3
  -6   6   8 7280.02 535.646   3
   6   6   8 7485.25 458.211   3
  -6  -6   8 7941.92 508.752   3
  -6   6   9 439.404 213.774   3
   6   6   9 1139.85 248.207   3
  -6  -6   9 793.925 252.887   3
  -6   6  10 6097.79 546.816   3
   6   6  10 6338.39 509.081   3
  -6  -6  10 6492.87 525.152   3
  -6   6  11 1736.68 399.390   3
   6   6  11 1346.82 300.035   3
  -6  -6  11 1007.54 272.099   3
  -6  -6  12 12671.3 828.708   3
  -6   6  12 10713.5 791.647   3
  -6   8  -5 4745.49 440.083   2
  -6   8  -4 17809.8 830.983   2
   6   8  -3 17635.0 530.790   3
   6  -8  -3 19029.6 488.844   1
  -6   8  -3 17360.9 815.670   2
  -6   8  -2 18410.9 390.230   1
  -6  -8  -2 18512.0 617.611   2
   6   8  -2 18662.5 471.831   3
  -6   8  -2 18408.5 829.436   2
   6  -8  -2 17380.3 377.679   1
   6   8  -1 21983.6 460.577   3
  -6   8  -1 22578.3 914.568   2
   6   8  -1 22886.3 777.327   2
   6   8   0 6080.65 372.698   2
  -6   8   0 5891.80 450.939   2
  -6   8   1 23237.4 904.570   2
   6   8   1 23056.8 756.524   2
   6   8   1 23448.6 900.626   1
   6   8   2 14341.6 671.624   1
   6   8   3 15396.7 378.070   3
   6   8   3 16176.3 709.947   1
   6   8   4 12212.2 623.844   1
   6   8   4 12461.6 387.860   3
   6   8   5 5267.79 277.294   3
  -6   8   6 6581.79 499.470   3
   6   8   6 6813.79 352.717   3
  -6   8   7 9207.03 598.663   3
   6   8   7 9370.37 463.527   3
  -6   8   8 11400.9 697.225   3
   6   8   8 11898.0 571.997   3
  -6   8   9 3860.13 460.223   3
   6   8   9 3696.84 361.491   3
  -6   8  10 2313.06 382.094   3
   6   8  10 2099.52 310.394   3
   6   8  11 6855.11 559.924   3
  -6   8  11 6001.74 578.723   3
  -6   8  12 1719.32 418.918   3
   6   8  12 1532.74 334.652   3
  -6  10  -7 7595.70 632.975   2
  -6  10  -6 1183.61 271.761   2
  -6  10  -5 29955.6 1224.19   2
  -6  10  -4 1247.19 275.341   2
   6  10  -3 6463.04 466.392   2
  -6  10  -3 6307.90 538.989   2
   6 -10  -3 6365.86 251.708   1
  -6  10  -2 3638.41 402.488   2
   6  10  -2 3352.54 197.566   3
   6  10  -2 4226.30 368.833   2
  -6  10  -1 12730.6 738.508   2
   6  10  -1 10777.5 590.453   2
   6  10  -1 11709.9 327.607   3
  -6  10   0 6344.48 509.312   2
   6  10   0 7542.07 535.081   1
   6  10   0 7265.40 468.017   2
   6  10   0 6250.73 179.214   3
  -6  10   1 16488.6 812.824   2
   6  10   1 15351.3 685.339   2
   6  10   1 15774.0 757.967   1
   6  10   2 3476.67 354.935   1
   6  10   2 4028.89 133.051   3
   6  10   3 5782.10 448.803   1
   6  10   3 5306.16 201.792   3
   6  10   4 1155.64 119.584   3
   6  10   4 1010.05 223.215   1
   6  10   5 29445.3 756.704   3
   6  10   6 1416.45 178.908   3
  -6  10   7 7391.57 566.887   3
   6  10   7 6948.31 402.158   3
   6  10   8 1721.24 244.550   3
  -6  10   8 1465.21 305.790   3
  -6  10   9 5419.17 553.259   3
  -6  10  10 779.751 291.441   3
  -6  10  11 11179.2 838.557   3
  -6  12 -10 3294.71 552.331   2
  -6  12  -9 1164.21 338.878   2
  -6  12  -8 7936.25 742.742   2
  -6  12  -7 860.712 352.452   2
  -6  12  -6 6363.17 612.999   2
  -6  12  -5 11403.3 790.259   2
   6  12  -4 6518.80 536.968   2
  -6  12  -4 6625.49 609.735   2
  -6  12  -3 939.336 292.717   2
   6  12  -3 1219.39 263.674   2
   6  12  -2 13121.6 723.265   2
  -6  12  -2 13497.9 832.250   2
   6  12  -1 3351.98 366.220   2
  -6  12  -1 2910.95 408.864   2
   6  12   0 6988.22 538.242   1
  -6  12   0 6927.66 597.340   2
   6  12   0 6037.28 483.503   2
  -6  12   1 3985.09 462.183   2
   6  12   1 3706.72 365.148   2
   6  12   1 3750.74 394.325   1
   6  12   2 11179.7 650.038   1
   6  12   3 1897.30 285.145   1
   6  12   4 10053.7 631.556   1
  -6  12   7 767.441 267.771   3
  -6  12   8 9139.24 696.397   3
  -6  12   9 1103.45 330.911   3
  -6  12  10 3424.56 487.599   3
  -6  12  11-200.344 298.899   3
  -6  14  -8 5029.92 657.515   2
  -6  14  -7 451.848 307.935   2
   6  14  -7 1114.92 346.818   2
  -6  14  -6 2711.74 454.438   2
   6  14  -6 3387.01 457.389   2
  -6  14  -5 2654.89 488.536   2
   6  14  -5 2117.15 373.182   2
  -6  14  -4 9805.93 791.777   2
   6  14  -4 9836.86 712.131   2
  -6  14  -3 4016.84 516.600   2
   6  14  -3 3353.46 437.820   2
  -6  14  -2 11537.0 830.610   2
   6  14  -2 12911.5 786.248   2
  -6  14  -1 1520.88 359.745   2
   6  14  -1 1609.11 303.552   2
   6  14  -1 1058.71 272.701   1
  -6  14   0 12759.7 856.615   2
   6  14   0 11540.6 709.825   1
   6  14   0 13842.9 792.244   2
  -6  14   1 808.491 315.217   2
   6  14   1 1073.29 261.655   2
   6  14   1 872.192 226.320   1
   6  14   2 11187.0 679.904   1
   6  14   3 3005.79 371.540   1
   6  14   4 12167.6 719.404   1
  -6  14   7 1719.01 373.854   3
  -6  14   8 7439.84 663.926   3
  -6  14   9 2851.54 449.850   3
  -6  14  10 1130.80 368.823   3
   6  16  -7 2398.09 458.980   2
  -6  16  -6 322.968 297.454   2
   6  16  -6 869.861 342.193   2
  -6  16  -5 8702.55 817.269   2
   6  16  -5 7743.80 690.473   2
   6  16  -4 230.346 275.168   2
  -6  16  -4 176.391 254.557   2
  -6  16  -3 5142.31 618.415   2
   6  16  -3 4595.42 553.228   2
  -6  16  -2 5171.72 646.589   2
   6  16  -2 3445.40 465.573   2
   6  16  -2 3871.76 449.711   1
  -6  16  -1 12450.8 919.313   2
   6  16  -1 11825.3 803.604   2
   6  16  -1 12683.6 754.681   1
  -6  16   0-88.0411 249.108   2
   6  16   0 61.9860 210.468   2
   6  16   0 9.61758 194.334   1
   6  16   1 11084.3 688.136   1
   6  16   1 11216.4 744.523   2
   6  16   2 4233.53 444.724   1
   6  16   3 6826.87 554.844   1
  -6  16   7 1844.62 393.152   3
  -6  16   8 835.489 336.787   3
   6  18  -5 1029.75 361.369   2
   6  18  -4 2201.71 449.449   2
   6  18  -3 2695.98 456.202   2
   6  18  -2 1894.12 389.895   2
  -6  18  -1 1483.50 424.180   2
   6  18  -1 1278.23 342.289   2
  -6  18   0 8695.48 826.314   2
   6  18   0 7384.86 674.822   2
  -7   1  -2 32388.7 760.573   2
  -7   1  -2 34135.4 861.572   1
  -7  -1  -2 33391.3 616.845   2
  -7   1  -1 53835.2 1050.84   2
   7  -1   0 16570.7 490.901   2
   7  -1   1 56276.8 1179.97   1
   7   1   1 55548.3 1296.20   1
   7  -1   1 54249.7 1115.15   2
   7   1   2 26004.7 760.491   1
   7  -1   2 25495.9 685.314   1
  -7  -1   3 24828.7 672.079   3
   7   1   3 25982.5 762.224   1
  -7   1   4 18497.6 630.788   3
  -7  -1   4 18175.5 594.797   3
  -7  -1   5 55287.3 1291.56   3
  -7   1   5 55506.5 1322.90   3
  -7   1   6 16058.0 655.708   3
  -7  -1   6 16298.6 639.932   3
  -7  -1   7 7360.37 448.406   3
  -7   1   7 7410.68 465.346   3
  -7   1   8 7132.55 485.941   3
  -7  -1   8 7094.66 478.919   3
  -7  -1   9 12406.4 674.028   3
  -7   1   9 13008.5 698.689   3
  -7  -1  10 584.040 233.318   3
  -7   1  10 444.236 238.333   3
  -7   1  11 8864.24 655.210   3
  -7  -1  11 8315.58 618.864   3
  -7  -1  12 568.971 279.871   3
  -7   1  12 1035.56 303.920   3
  -7   1  13 236.065 267.788   3
  -7  -1  13 64.5742 302.855   3
  -7  -3  -4 19296.9 543.206   3
  -7   3  -3 11559.7 485.295   2
  -7   3  -3 10739.6 415.454   1
  -7  -3  -3 10765.8 342.648   3
  -7   3  -2 39569.9 995.600   2
  -7   3  -2 38392.9 885.736   1
  -7  -3  -2 39114.2 755.966   3
   7  -3  -1 5083.35 311.241   2
  -7   3  -1 5119.41 298.115   2
  -7   3   0 72875.3 1520.07   2
   7  -3   0 78087.1 1423.73   1
   7  -3   0 77935.5 1617.36   2
  -7  -3   1 5231.96 195.116   3
   7  -3   1 5234.33 227.424   1
   7   3   1 4649.07 348.826   1
   7  -3   1 4757.84 307.559   2
   7   3   2 34356.8 997.613   1
  -7  -3   2 35508.1 753.386   3
  -7  -3   3 9892.33 368.029   3
   7   3   3 10233.8 492.136   1
  -7  -3   4 24816.6 697.370   3
   7   3   4 24509.6 812.413   1
  -7   3   5 4006.22 313.295   3
  -7  -3   5 3751.38 269.873   3
  -7   3   6 16393.8 682.176   3
  -7  -3   6 15093.4 613.943   3
  -7  -3   7 325.704 151.750   3
  -7   3   7 918.809 221.325   3
  -7   3   8 16664.3 771.894   3
  -7  -3   8 15829.0 719.741   3
  -7   3   9 5073.83 469.298   3
  -7  -3   9 5878.60 462.152   3
  -7   3  10 3276.48 421.904   3
  -7  -3  10 4358.91 444.277   3
  -7   3  11 6180.29 561.270   3
  -7  -3  11 5365.53 518.144   3
  -7  -3  12 4013.70 487.735   3
  -7   3  12 3469.22 471.264   3
  -7  -3  13 90.3252 299.056   3
  -7   3  13-218.404 268.982   3
  -7   5  -4 10709.0 548.426   2
  -7  -5  -4 10432.9 355.076   3
  -7  -5  -4 10969.9 378.833   2
  -7   5  -4 11312.8 440.666   1
  -7  -5  -3 30208.7 620.201   3
   7   5  -3 29509.6 727.450   3
  -7   5  -3 30150.3 736.878   1
  -7  -5  -3 30380.1 669.986   2
  -7   5  -3 29530.1 959.059   2
  -7  -5  -2 27454.1 505.709   3
  -7   5  -2 29771.0 932.830   2
  -7   5  -2 29379.8 656.754   1
  -7   5  -1 13282.7 585.118   2
   7  -5   0 7178.36 203.456   1
  -7   5   0 7574.19 421.145   2
   7   5   0 7865.29 301.359   2
  -7  -5   1 13502.2 312.334   3
   7   5   1 13478.5 370.367   2
   7   5   1 11740.7 608.361   1
   7   5   2 27760.3 949.243   1
  -7  -5   2 29762.7 640.530   3
   7   5   3 33356.6 1035.07   1
  -7  -5   3 34075.2 784.925   3
   7   5   4 9230.28 509.897   1
  -7  -5   4 8834.51 385.341   3
  -7  -5   5 10103.7 456.032   3
  -7  -5   6 2545.18 253.927   3
  -7   5   6 2510.89 300.030   3
  -7   5   7 7514.11 501.506   3
  -7  -5   7 7289.02 448.624   3
  -7   5   8 9477.19 603.242   3
  -7  -5   8 9689.90 552.038   3
  -7   5   9 8203.88 608.287   3
  -7  -5   9 8853.26 569.211   3
  -7  -5  10 2621.87 361.623   3
  -7   5  10 2512.28 353.679   3
  -7   5  11 9605.45 721.788   3
  -7  -5  11 8938.17 646.190   3
  -7   5  12 5261.25 579.440   3
  -7  -5  12 4760.99 523.018   3
  -7  -5  13 6197.29 620.446   3
  -7   7  -5 2033.46 297.391   2
  -7  -7  -4 4895.43 291.121   2
  -7   7  -4 4779.10 267.410   1
  -7   7  -4 4573.10 411.078   2
   7   7  -3 20444.5 559.424   3
  -7   7  -3 20520.2 540.798   1
  -7   7  -3 19453.7 838.220   2
  -7  -7  -3 22072.3 615.976   2
  -7   7  -2 784.322 78.2979   1
  -7   7  -2 718.082 193.234   2
   7   7  -2 906.161 90.2207   3
   7   7  -1 10202.6 448.673   2
  -7   7  -1 9587.44 555.059   2
  -7   7   0 6753.58 457.488   2
   7   7   0 6779.59 359.736   2
  -7   7   1 14437.7 664.672   2
   7   7   1 12655.4 474.079   2
   7   7   1 13572.3 682.220   1
   7   7   2 598.998 159.669   1
   7   7   3 17657.9 757.059   1
   7   7   4 3976.41 362.647   1
   7   7   5 2237.18 179.853   3
  -7  -7   5 2790.51 248.704   3
  -7  -7   6 11014.6 529.974   3
   7   7   6 10372.8 455.124   3
  -7   7   7 24092.0 986.590   3
   7   7   7 25285.8 805.882   3
  -7  -7   7 25007.3 890.859   3
  -7   7   8 2321.16 376.425   3
   7   7   8 2111.66 256.276   3
  -7  -7   8 2347.68 298.376   3
  -7   7   9 8170.93 622.629   3
   7   7   9 9486.07 544.646   3
  -7  -7   9 8866.92 593.498   3
  -7   7  10 5289.15 540.319   3
   7   7  10 5100.43 448.669   3
  -7  -7  10 5292.63 499.988   3
  -7   7  11 6932.34 634.493   3
  -7   7  12 1189.98 375.435   3
  -7   9  -7 3062.49 436.534   2
  -7   9  -6 19973.9 975.090   2
  -7   9  -5 639.471 246.324   2
   7  -9  -4 6420.15 305.731   1
  -7   9  -4 5737.38 499.628   2
   7  -9  -3 940.615 92.4740   1
   7   9  -3 918.836 119.661   3
  -7   9  -3 820.799 215.761   2
  -7   9  -3 956.785 95.8522   1
   7   9  -2 6084.51 404.381   2
   7   9  -2 6183.24 241.094   3
  -7   9  -2 6110.30 497.703   2
   7   9  -1 3785.84 135.145   3
  -7   9  -1 4716.95 432.010   2
   7   9  -1 4570.46 345.442   2
  -7   9   0 22888.6 972.163   2
   7   9   0 23876.2 831.073   2
   7   9   1 3537.92 378.977   1
  -7   9   1 3365.22 365.030   2
   7   9   1 2903.48 268.657   2
   7   9   2 7242.66 512.464   1
   7   9   3 746.420 202.337   1
   7   9   4 4071.41 385.783   1
   7   9   4 3984.84 192.779   3
   7   9   5 2220.07 180.635   3
   7   9   6 23935.7 704.611   3
  -7   9   7 4098.88 431.037   3
   7   9   7 3697.81 286.665   3
  -7   9   8 1944.17 333.538   3
   7   9   8 2590.26 272.528   3
  -7   9   9 4494.62 493.964   3
   7   9   9 5106.81 408.459   3
  -7   9  10 4973.37 551.453   3
  -7   9  11 70.6841 274.926   3
  -7  11 -10 4273.66 596.689   2
  -7  11  -9 2142.16 425.868   2
  -7  11  -8 1644.02 385.816   2
  -7  11  -7 6075.85 613.215   2
  -7  11  -6 8841.75 693.753   2
  -7  11  -5 1460.48 305.967   2
  -7  11  -4 13148.9 823.414   2
   7  11  -3 18628.0 835.850   2
  -7  11  -3 18225.1 960.839   2
  -7  11  -2 1883.43 350.917   2
   7  11  -2 2070.18 286.546   2
  -7  11  -1 348.037 227.392   2
   7  11  -1 178.823 146.173   2
   7  11   0 8039.27 587.629   1
  -7  11   0 7652.88 598.936   2
   7  11   0 7661.37 502.875   2
  -7  11   1 1554.51 307.831   2
   7  11   1 1420.79 212.727   2
   7  11   1 1400.55 264.473   1
   7  11   2 4628.36 433.736   1
   7  11   3 18899.1 873.660   1
   7  11   4 12851.2 717.912   1
  -7  11   7 4704.76 489.926   3
  -7  11   8 1892.00 379.154   3
  -7  11   9 1440.93 361.856   3
  -7  11  10 4329.54 531.385   3
  -7  11  11 1421.70 408.437   3
  -7  13  -9 9597.82 855.664   2
  -7  13  -8 2432.60 492.729   2
  -7  13  -7 6073.70 647.023   2
  -7  13  -6 462.716 292.053   2
  -7  13  -5 6334.68 649.318   2
   7  13  -5 6924.41 579.930   2
  -7  13  -4 3057.48 456.937   2
   7  13  -4 2532.20 375.127   2
  -7  13  -3 4714.04 534.967   2
   7  13  -3 3792.63 414.803   2
  -7  13  -2 1946.33 382.328   2
   7  13  -2 1761.44 313.694   2
   7  13  -1 16750.7 846.304   2
  -7  13  -1 16448.9 963.182   2
   7  13  -1 16456.3 874.881   1
  -7  13   0 122.404 205.500   2
   7  13   0-20.1381 168.644   1
   7  13   0 91.8030 166.791   2
  -7  13   1 10345.5 755.633   2
   7  13   1 12362.3 681.069   2
   7  13   1 11727.3 703.837   1
   7  13   2 2094.20 322.200   1
   7  13   3 5650.92 495.599   1
   7  13   4 3251.80 384.450   1
  -7  13   7 5005.84 535.887   3
  -7  13   8 2197.32 373.796   3
  -7  13   9 10659.4 805.631   3
  -7  13  10-47.3304 317.669   3
   7  15  -8 3171.48 518.514   2
  -7  15  -7 2105.98 496.850   2
   7  15  -7 3077.78 500.722   2
  -7  15  -6 2884.80 485.670   2
   7  15  -6 3162.53 462.904   2
  -7  15  -5 407.722 233.251   2
   7  15  -5 920.637 303.931   2
   7  15  -4 5145.11 538.865   2
  -7  15  -4 5217.46 618.326   2
  -7  15  -3 4769.55 574.107   2
   7  15  -3 3845.94 459.302   2
  -7  15  -2 4293.60 565.883   2
   7  15  -2 4380.97 489.713   2
   7  15  -1 3827.39 445.360   1
  -7  15  -1 3207.82 480.196   2
   7  15  -1 3078.10 412.039   2
   7  15   0 7419.62 581.174   1
  -7  15   0 7114.07 673.468   2
   7  15   0 7238.88 596.704   2
   7  15   1 3229.49 405.337   2
   7  15   1 2697.85 380.543   1
   7  15   2 2519.68 354.600   1
   7  15   3 4162.38 461.400   1
   7  15   4 6870.63 565.672   1
  -7  15   7 4080.32 528.149   3
  -7  15   8 4464.75 557.087   3
  -7  15   9 2875.27 480.483   3
   7  17  -6 4088.28 548.924   2
   7  17  -5 5200.88 601.460   2
  -7  17  -4 4043.68 585.882   2
   7  17  -4 3625.40 501.653   2
  -7  17  -3 559.611 381.982   2
   7  17  -3 421.236 250.801   2
  -7  17  -2 5805.30 666.700   2
   7  17  -2 5104.22 566.988   2
  -7  17  -1 1387.71 368.828   2
   7  17  -1 2235.45 417.168   2
  -7  17   0 7537.47 743.213   2
   7  17   0 7989.85 652.387   2
  -7  17   7 537.789 301.713   3
   7  19  -4 1086.92 352.270   2
  -8   0  -3 88.6281 64.7418   2
  -8   0  -2 10428.7 326.312   2
   8   0   0 39656.7 844.030   2
   8   0   1 51.9481 80.5807   1
   8   0   1 54.3720 52.6538   2
   8   0   2 3536.44 256.399   1
   8   0   3 99.3372 106.257   1
  -8   0   4 32015.4 872.204   3
  -8   0   5 0.51020 108.628   3
  -8   0   6 3193.03 283.671   3
  -8   0   7 192.350 163.755   3
  -8   0   8 9167.40 558.632   3
  -8   0   9 83.8957 159.841   3
  -8   0  10 23541.4 1010.86   3
  -8   0  11-59.8056 226.728   3
  -8   0  12 4081.59 487.899   3
  -8   0  13 134.123 246.332   3
  -8   2  -3 7467.18 365.877   2
  -8   2  -2 15794.8 543.868   1
  -8   2  -2 14246.0 507.915   2
   8  -2  -1 20320.2 632.735   2
  -8   2  -1 19947.3 589.856   2
   8  -2   0 77615.8 1589.34   2
   8  -2   1 12628.1 443.554   1
   8   2   1 12625.0 575.960   1
   8  -2   1 10900.9 454.081   2
   8   2   2 16610.8 647.429   1
   8  -2   2 16030.4 511.818   1
  -8  -2   3 12872.1 449.697   3
   8   2   3 13915.1 580.544   1
  -8  -2   4 8136.25 378.284   3
   8   2   4 6936.16 414.740   1
  -8  -2   5 13748.9 542.977   3
  -8   2   5 14505.6 608.740   3
  -8  -2   6 3968.62 322.571   3
  -8   2   6 4748.11 362.058   3
  -8   2   7 7369.28 480.408   3
  -8  -2   7 8288.71 480.582   3
  -8  -2   8 448.357 204.574   3
  -8   2   8 351.560 178.319   3
  -8   2   9 7246.61 535.458   3
  -8  -2   9 7326.99 518.469   3
  -8  -2  10 1010.23 270.965   3
  -8   2  10 1299.32 288.236   3
  -8  -2  11 129.719 203.874   3
  -8   2  11 10.8876 234.841   3
  -8  -2  12 2795.61 403.306   3
  -8   2  12 2526.46 414.113   3
  -8   2  13 7069.48 689.815   3
  -8  -2  13 7973.03 690.689   3
  -8   4  -4 6989.35 423.274   2
  -8  -4  -4 6097.83 271.365   3
  -8   4  -3 45222.8 1023.25   1
  -8   4  -3 45333.6 1179.40   2
  -8  -4  -3 42538.6 776.011   2
  -8  -4  -3 44540.6 865.730   3
  -8   4  -2 4641.27 336.316   2
  -8   4  -2 4630.37 257.587   1
  -8  -4  -2 4744.24 177.884   3
  -8   4  -1 2354.14 233.334   2
  -8   4   0 2301.79 221.682   2
   8  -4   0 2186.16 156.052   1
  -8  -4   1 4562.72 179.513   3
   8  -4   1 4084.60 201.658   1
   8   4   1 3421.00 338.348   1
  -8  -4   2 6315.61 256.873   3
   8   4   2 5906.17 412.410   1
  -8  -4   3 45827.4 987.903   3
   8   4   3 44728.6 1254.06   1
   8   4   4 9367.92 509.125   1
  -8  -4   4 9378.19 401.366   3
  -8  -4   5 14156.2 544.789   3
  -8  -4   6 168.232 116.374   3
  -8   4   6 197.978 145.486   3
  -8   4   7 10453.5 598.749   3
  -8  -4   7 10177.2 543.340   3
  -8   4   8 5733.39 473.447   3
  -8  -4   8 5480.03 427.594   3
  -8   4   9 4448.05 453.952   3
  -8  -4   9 5155.06 449.091   3
  -8  -4  10 2397.31 339.578   3
  -8   4  10 1715.07 315.141   3
  -8  -4  11 3332.31 432.265   3
  -8   4  11 2918.84 425.642   3
  -8  -4  12 852.053 320.001   3
  -8   4  12 686.309 288.619   3
  -8  -4  13 4034.39 500.205   3
  -8  -6  -5 899.315 127.859   2
  -8  -6  -5 994.348 131.856   3
  -8   6  -5 921.859 209.801   2
  -8  -6  -4 5891.13 244.812   3
  -8   6  -4 6100.54 318.704   1
  -8  -6  -4 6481.79 284.921   2
  -8   6  -4 6416.12 457.330   2
  -8   6  -3 6889.74 310.999   1
  -8  -6  -3 7142.44 220.865   3
  -8  -6  -3 7594.27 279.626   2
  -8   6  -3 6909.71 474.119   2
  -8   6  -2 24152.5 890.249   2
  -8   6  -1 938.412 185.085   2
  -8   6   0 3671.41 315.654   2
   8   6   0 3102.17 210.319   2
   8   6   1 1082.76 228.743   1
   8   6   1 1265.70 120.126   2
   8   6   2 21837.9 889.827   1
  -8  -6   2 24717.3 556.867   3
   8   6   3 7058.38 470.740   1
  -8  -6   3 7481.84 312.724   3
   8   6   4 7576.24 491.525   1
  -8  -6   4 7665.90 354.390   3
  -8  -6   5 958.499 156.350   3
  -8   6   6 5947.59 470.254   3
  -8  -6   6 6119.34 383.654   3
  -8   6   7 10501.9 631.151   3
  -8  -6   7 10130.9 537.923   3
  -8   6   8 9932.31 638.221   3
  -8  -6   8 10071.7 573.034   3
  -8  -6   9 754.282 234.739   3
  -8   6   9 1064.77 269.870   3
  -8   6  10 8755.75 666.165   3
  -8  -6  10 8392.22 604.983   3
  -8   6  11 639.839 299.456   3
  -8  -6  11-15.9747 214.656   3
  -8   6  12 8270.49 724.025   3
  -8  -6  12 8737.32 695.551   3
  -8   8  -7 15068.1 838.434   2
  -8   8  -6 1768.99 318.620   2
  -8   8  -5 4942.10 460.388   2
  -8   8  -4 7370.11 334.336   1
  -8  -8  -4 7903.28 374.811   2
  -8   8  -4 7528.66 545.879   2
  -8  -8  -3 4339.87 263.384   2
  -8   8  -3 4143.98 211.294   1
   8   8  -3 4548.08 234.234   3
  -8   8  -3 4179.99 419.548   2
  -8   8  -2 19651.0 881.409   2
  -8   8  -1 17409.5 800.746   2
   8   8  -1 16299.9 628.510   2
  -8   8   0 6451.59 480.065   2
   8   8   0 6837.14 383.873   2
   8   8   1 21526.5 674.592   2
   8   8   1 20331.2 914.788   1
   8   8   2 16496.6 797.811   1
   8   8   3 1298.43 245.899   1
   8   8   4 4944.64 431.470   1
   8   8   5 8455.35 566.148   1
  -8   8   7 18421.3 897.535   3
  -8   8   8 9046.04 653.965   3
  -8   8   9 3831.28 469.544   3
  -8   8  10 3892.96 474.310   3
  -8   8  11 7395.49 683.858   3
  -8  10 -10 1747.82 400.714   2
  -8  10  -9 5746.60 623.362   2
  -8  10  -8 1297.65 348.894   2
  -8  10  -7 8951.62 706.139   2
  -8  10  -6 456.740 220.586   2
  -8  10  -5 18654.5 968.899   2
  -8  10  -4 2187.88 340.850   2
  -8  10  -3 2673.70 370.616   2
  -8  10  -2 10728.4 692.431   2
   8  10  -2 9667.22 553.775   2
   8  10  -1 8707.68 504.245   2
  -8  10  -1 7825.13 584.879   2
  -8  10   0 12327.8 735.315   2
   8  10   0 13936.4 637.153   2
   8  10   0 13864.2 778.507   1
  -8  10   1 10473.2 668.531   2
   8  10   1 10008.4 512.123   2
   8  10   1 10474.8 669.071   1
   8  10   2 10808.2 663.617   1
   8  10   3 5540.37 482.575   1
   8  10   4 2398.79 342.650   1
   8  10   5 21907.7 971.611   1
  -8  10   7 10376.1 702.910   3
  -8  10   8 969.730 264.427   3
  -8  10   9 4508.46 508.515   3
  -8  10  10 1854.45 427.125   3
  -8  10  11 9176.85 777.478   3
  -8  12 -10 2724.66 522.783   2
  -8  12  -9 2298.93 467.631   2
  -8  12  -8 3997.18 539.619   2
  -8  12  -7 503.485 265.115   2
  -8  12  -6 6084.73 622.928   2
  -8  12  -5 6511.75 629.536   2
   8  12  -4 10253.4 664.573   2
  -8  12  -4 10635.9 776.406   2
  -8  12  -3 4342.27 501.759   2
   8  12  -3 3366.75 391.694   2
  -8  12  -2 9658.79 712.993   2
   8  12  -2 9455.33 591.075   2
  -8  12  -1 1430.77 316.371   2
   8  12  -1 1750.49 285.553   2
  -8  12   0 6310.65 576.654   2
   8  12   0 6222.20 476.023   2
   8  12   0 6859.60 577.344   1
   8  12   1 4232.26 457.051   1
  -8  12   1 3106.88 417.417   2
   8  12   1 3571.92 345.883   2
   8  12   2 8673.46 620.757   1
   8  12   3 5643.98 511.203   1
   8  12   4 12204.4 746.727   1
  -8  12   7 505.885 235.869   3
  -8  12   8 4158.08 494.006   3
  -8  12   9 1066.61 343.531   3
  -8  12  10 2928.03 500.165   3
  -8  14  -8 4586.79 625.887   2
  -8  14  -7 2420.05 487.342   2
  -8  14  -6 786.314 317.564   2
   8  14  -6 1388.72 336.364   2
  -8  14  -5 928.970 342.515   2
   8  14  -5 1705.91 357.005   2
  -8  14  -4 3941.95 536.238   2
   8  14  -4 4044.11 466.821   2
  -8  14  -3 5512.20 610.598   2
   8  14  -3 5138.83 516.290   2
  -8  14  -2 9510.95 771.300   2
   8  14  -2 8326.54 620.206   2
  -8  14  -1 11657.5 848.298   2
   8  14  -1 11636.8 716.727   2
   8  14  -1 11209.7 762.558   1
  -8  14   0 6523.52 630.311   2
   8  14   0 6929.08 538.377   2
   8  14   0 6285.65 558.713   1
   8  14   1 11078.8 735.856   1
   8  14   1 11304.1 672.573   2
   8  14   2 5311.29 506.062   1
   8  14   3 4399.94 467.397   1
   8  14   4 6532.71 569.725   1
  -8  14   7 2141.35 410.798   3
  -8  14   8 6569.41 655.234   3
  -8  14   9 1849.73 446.949   3
   8  16  -7 1603.07 416.216   2
   8  16  -6 913.193 324.538   2
  -8  16  -5 7738.29 795.737   2
   8  16  -5 6650.64 653.313   2
  -8  16  -4 2527.37 516.064   2
   8  16  -4 1635.27 353.684   2
  -8  16  -3 3561.97 541.809   2
   8  16  -3 4069.42 498.104   2
  -8  16  -2 1570.59 378.311   2
   8  16  -2 1039.09 294.751   2
   8  16  -2 1514.52 326.951   1
  -8  16  -1 10314.2 845.712   2
   8  16  -1 9363.16 704.031   2
   8  16  -1 9812.87 717.270   1
  -8  16   0 556.066 292.066   2
   8  16   0 918.051 293.113   1
   8  16   1 6937.86 605.046   1
   8  16   2 1507.38 328.786   1
   8  16   3 4735.77 491.663   1
   8  16   4 2726.64 408.820   1
  -8  16   7 756.809 298.801   3
   8  18  -5 170.205 263.162   2
  -9   1  -3 7349.40 330.783   2
  -9  -1  -3 6953.43 247.694   2
  -9   1  -2 128.494 70.6230   2
   9  -1  -1 24498.4 683.298   2
   9   1   0 27111.5 604.270   2
   9  -1   0 26505.4 725.350   2
   9  -1   1 21875.5 632.176   2
   9   1   1 22847.1 808.279   1
   9  -1   1 24182.5 735.437   1
   9  -1   2 257.761 99.3731   1
   9   1   2 240.208 111.752   1
   9   1   3 5060.86 347.158   1
   9  -1   3 5136.96 316.551   1
  -9  -1   4 4657.18 294.896   3
   9   1   4 4623.61 345.347   1
  -9  -1   5 18879.4 678.001   3
  -9   1   5 19637.4 712.941   3
  -9  -1   6 2223.30 259.698   3
  -9   1   6 2482.67 279.182   3
  -9  -1   7 1795.49 233.744   3
  -9   1   7 1596.23 254.378   3
  -9  -1   8 2984.01 338.319   3
  -9   1   8 2923.89 340.036   3
  -9   1   9 6902.86 531.486   3
  -9  -1   9 7851.93 549.035   3
  -9   1  10 5469.77 498.297   3
  -9  -1  10 5129.42 475.824   3
  -9  -1  11 7989.27 630.354   3
  -9   1  11 8489.13 649.787   3
  -9  -1  12 1703.18 332.082   3
  -9   1  12 1624.26 365.533   3
  -9  -1  13 2474.19 436.357   3
  -9  -3  -4 20876.9 587.545   3
  -9   3  -4 20353.0 733.868   2
  -9   3  -3 8606.26 427.769   2
  -9  -3  -3 7771.82 310.244   3
  -9   3  -2 16922.4 608.531   2
  -9   3  -1 12552.8 493.551   2
   9  -3   0 7627.31 362.210   1
   9  -3   1 12286.2 426.428   1
   9   3   1 10401.4 581.100   1
   9  -3   1 10088.5 488.804   2
   9   3   2 9129.51 522.106   1
  -9  -3   2 9827.52 350.055   3
   9  -3   2 10144.7 396.886   1
  -9  -3   3 7262.62 328.464   3
   9   3   3 7274.92 450.684   1
  -9  -3   4 21793.7 672.206   3
   9   3   4 22431.4 830.715   1
  -9  -3   5 1348.62 187.862   3
  -9   3   6 13839.0 646.239   3
  -9  -3   6 12414.5 558.521   3
  -9   3   7 6267.52 458.858   3
  -9  -3   7 6974.51 442.677   3
  -9   3   8 10947.2 645.906   3
  -9  -3   8 11888.7 621.023   3
  -9  -3   9 2167.68 334.394   3
  -9   3   9 2073.52 344.580   3
  -9  -3  10 2308.20 349.536   3
  -9   3  10 2581.37 386.291   3
  -9  -3  11 940.064 274.551   3
  -9   3  11 1211.90 335.452   3
  -9  -3  12 1162.55 329.640   3
  -9   3  12 875.149 295.018   3
  -9  -3  13 2430.94 422.066   3
  -9   5  -5 6291.43 444.447   2
  -9  -5  -4 7594.87 297.961   3
  -9  -5  -4 7536.87 261.503   2
  -9   5  -4 7784.07 484.081   2
  -9   5  -3 8969.09 517.625   2
  -9   5  -3 8980.89 393.404   1
  -9  -5  -3 8528.53 277.109   3
  -9   5  -2 44344.4 1228.04   2
  -9  -5  -2 43421.6 767.943   3
  -9   5  -1 3498.78 304.454   2
  -9   5   0 1207.75 184.290   2
  -9  -5   0 1205.24 68.7405   3
   9  -5   0 1374.98 114.604   1
   9   5   0 1337.37 116.472   2
  -9  -5   1 2235.99 121.227   3
   9   5   1 1761.51 259.402   1
   9   5   2 40567.4 1304.38   1
  -9  -5   2 46968.0 917.406   3
   9   5   3 10771.8 601.466   1
  -9  -5   3 12012.0 414.054   3
   9   5   4 7596.92 507.338   1
  -9  -5   4 8237.45 380.477   3
  -9  -5   5 7188.66 386.784   3
   9   5   5 7193.66 493.465   1
  -9  -5   6 254.778 118.723   3
  -9   5   6 134.592 170.169   3
  -9   5   7 6884.75 513.411   3
  -9  -5   7 8973.92 510.870   3
  -9  -5   8 3621.09 361.970   3
  -9   5   8 4300.51 434.571   3
  -9   5   9 7247.69 583.659   3
  -9  -5   9 7837.67 537.181   3
  -9   5  10 4886.00 508.736   3
  -9  -5  10 5594.56 493.023   3
  -9  -5  11 2807.62 414.044   3
  -9   5  11 2995.37 440.895   3
  -9  -5  12 4435.92 522.220   3
  -9   5  12 2721.95 441.922   3
  -9   7  -7 18818.4 919.987   2
  -9   7  -6 7031.41 536.020   2
  -9   7  -5 3047.99 367.101   2
  -9   7  -4 1468.05 260.134   2
  -9  -7  -4 1504.53 140.260   2
  -9   7  -4 1359.51 160.493   1
  -9   7  -3 8308.25 544.082   2
  -9   7  -3 7879.46 336.994   1
  -9   7  -2 542.062 192.039   2
  -9   7  -1 7941.79 516.982   2
   9   7  -1 7142.93 356.931   2
   9   7   0 3467.54 243.750   2
  -9   7   0 3805.32 359.445   2
   9   7   1 9799.07 357.014   2
   9   7   1 9271.86 618.089   1
   9   7   2 915.456 200.875   1
   9   7   3 6719.05 496.583   1
  -9  -7   3 7444.15 305.943   3
   9   7   4 906.174 218.170   1
  -9  -7   4 834.156 140.540   3
   9   7   5 6352.69 494.748   1
  -9  -7   5 6624.62 369.879   3
  -9  -7   6 9562.58 489.663   3
  -9   7   7 21294.7 965.459   3
  -9  -7   7 22327.5 826.717   3
  -9   7   8 1756.27 339.182   3
  -9  -7   8 1070.30 231.963   3
  -9   7   9 7735.09 641.043   3
  -9  -7   9 7731.79 549.797   3
  -9   7  10 2945.59 444.069   3
  -9  -7  10 2649.46 372.037   3
  -9   7  11 7037.24 656.655   3
  -9  -7  11 7297.01 624.071   3
  -9  -7  12 549.363 253.135   3
  -9   9  -9 3489.20 475.723   2
  -9   9  -8 1993.60 375.837   2
  -9   9  -7 2063.26 359.874   2
  -9   9  -6 13769.3 826.273   2
  -9   9  -5 1102.35 249.614   2
  -9   9  -4 7133.86 581.772   2
  -9   9  -3 406.339 190.011   2
   9   9  -2 4562.73 351.349   2
  -9   9  -2 4662.78 467.658   2
  -9   9  -1 2921.30 361.330   2
   9   9  -1 2568.29 263.173   2
   9   9   0 8279.55 446.495   2
  -9   9   0 7867.39 556.549   2
   9   9   0 7405.84 589.128   1
   9   9   1 1675.77 195.283   2
   9   9   1 1933.27 317.986   1
   9   9   2 7029.50 545.700   1
   9   9   3 791.833 241.105   1
   9   9   4 5253.24 482.701   1
   9   9   5 1968.78 314.998   1
  -9   9   7 2432.19 364.122   3
  -9   9   8 1384.86 341.952   3
  -9   9   9 3391.83 486.939   3
  -9   9  10 6168.14 612.454   3
  -9   9  11 718.720 366.099   3
  -9  11 -10 4452.93 605.656   2
  -9  11  -9 1549.90 368.265   2
  -9  11  -8 291.950 301.622   2
  -9  11  -7 4845.15 566.188   2
  -9  11  -6 3795.76 486.183   2
  -9  11  -5 335.724 237.401   2
  -9  11  -4 9688.27 728.745   2
   9  11  -3 11858.0 649.831   2
  -9  11  -3 14060.6 860.025   2
  -9  11  -2 4657.10 499.538   2
   9  11  -2 3478.40 344.699   2
  -9  11  -1 2082.80 355.851   2
   9  11  -1 1642.54 236.443   2
  -9  11   0 5162.26 516.016   2
   9  11   0 5575.24 419.438   2
   9  11   0 5302.18 527.345   1
   9  11   1 3121.75 407.535   1
   9  11   1 3074.80 299.923   2
   9  11   2 8116.78 603.795   1
   9  11   3 12583.2 756.159   1
   9  11   4 9504.88 659.831   1
   9  11   5 731.617 242.005   1
  -9  11   7 4753.81 538.038   3
  -9  11   8 1364.24 322.782   3
  -9  11   9 1763.35 403.470   3
  -9  11  10 3858.18 552.882   3
  -9  13  -8 789.086 357.415   2
  -9  13  -7 3950.54 534.744   2
  -9  13  -6-118.922 211.795   2
   9  13  -5 4290.84 471.883   2
  -9  13  -5 4379.19 557.159   2
  -9  13  -4 107.093 280.269   2
   9  13  -4 200.449 199.168   2
  -9  13  -3 3230.73 458.251   2
   9  13  -3 2964.98 357.315   2
  -9  13  -2 2543.14 420.580   2
   9  13  -2 2819.39 363.343   2
  -9  13  -1 15518.0 953.935   2
   9  13  -1 17792.7 841.486   2
   9  13  -1 16827.5 951.124   1
  -9  13   0 887.610 335.653   2
   9  13   0 698.046 228.253   1
   9  13   0 530.265 181.294   2
   9  13   1 12380.3 784.579   1
   9  13   1 12730.5 661.832   2
   9  13   2 3444.46 436.595   1
   9  13   3 5903.84 549.976   1
   9  13   4 702.040 305.162   1
   9  13   5 6397.65 569.983   1
  -9  13   7 2863.43 431.587   3
  -9  13   8 338.425 254.908   3
  -9  13   9 9244.21 785.062   3
   9  15  -8 1444.26 377.374   2
   9  15  -7 2090.44 426.178   2
  -9  15  -6 3268.98 533.449   2
   9  15  -6 3652.00 508.432   2
  -9  15  -5-62.3055 246.137   2
   9  15  -5 406.585 263.068   2
  -9  15  -4 6086.84 675.980   2
   9  15  -4 5422.14 545.696   2
  -9  15  -3 1028.25 358.220   2
   9  15  -3 1625.40 328.533   2
  -9  15  -2 3123.83 511.475   2
   9  15  -2 3007.23 414.494   2
   9  15  -2 3421.26 467.100   1
   9  15  -1 844.943 288.887   1
  -9  15  -1 1617.75 427.964   2
   9  15  -1 1329.81 299.491   2
  -9  15   0 5620.40 612.321   2
   9  15   0 5815.58 568.501   1
   9  15   1-359.472 263.954   1
   9  15   2 2280.11 378.777   1
   9  15   3 1427.09 320.879   1
   9  15   4 6181.27 587.961   1
  -9  15   7 1131.20 372.540   3
   9  17  -6 2792.65 465.822   2
   9  17  -5 3775.22 515.540   2
   9  17  -3-164.889 256.273   1
   9  17  -2 2158.30 404.883   1
  -9  17  -2 3286.88 580.083   2
  -9  17  -1 2854.79 499.818   2
   9  17  -1 1979.78 381.704   1
  -9  17   0 2326.19 461.917   2
   9  17   0 1497.63 336.091   1
   9  17   1 2321.76 391.589   1
   9  17   2 3108.49 450.751   1
   9  17   3 180.366 248.955   1
   9  17   4 3528.97 469.552   1
 -10   0  -4 23890.4 649.364   2
 -10   0  -3 160.106 72.0281   2
 -10   0  -2 22587.3 534.700   2
  10   0   0 184011. 3082.71   2
  10   0   1 82.7082 128.556   1
  10   0   1 35.1054 51.1602   2
  10   0   2 23953.4 800.445   1
  10   0   3-56.5737 86.7370   1
 -10   0   4 23353.0 751.365   3
 -10   0   5 182.323 138.401   3
 -10   0   6 19196.0 752.714   3
 -10   0   7-34.3794 147.150   3
 -10   0   8 5299.30 438.730   3
 -10   0   9-8.64792 168.050   3
 -10   0  10 12027.9 722.742   3
 -10   0  11-68.6461 227.781   3
 -10   0  12 2906.82 462.541   3
 -10   2  -4 18007.9 636.933   2
 -10   2  -3 26941.8 785.607   2
 -10   2  -2 8039.82 373.237   2
 -10   2  -1 40033.6 946.174   2
  10   2   0 14295.4 367.738   2
  10  -2   0 14681.6 569.833   2
  10  -2   1 39821.4 984.825   1
  10   2   1 36888.5 1163.57   1
  10   2   2 6335.25 423.239   1
  10  -2   2 6364.55 344.708   1
 -10  -2   3 29777.8 784.826   3
  10   2   3 29957.0 971.923   1
  10  -2   3 28370.0 825.116   1
 -10  -2   4 14097.2 536.545   3
  10   2   4 13669.1 630.752   1
 -10  -2   5 21724.7 732.427   3
 -10   2   5 21922.7 807.694   3
 -10  -2   6 9135.21 493.512   3
 -10   2   6 10384.2 558.483   3
 -10  -2   7 1382.92 237.113   3
 -10   2   7 1308.12 237.797   3
 -10  -2   8 1615.72 260.644   3
 -10   2   8 1440.37 263.612   3
 -10   2   9 10368.8 658.754   3
 -10  -2   9 11088.7 654.894   3
 -10  -2  10 3468.54 428.035   3
 -10   2  10 3596.95 440.212   3
 -10   2  11 5296.60 556.867   3
 -10  -2  11 6401.08 575.159   3
 -10  -2  12 3862.65 487.807   3
 -10   2  12 3718.92 492.656   3
 -10   4  -5 9526.09 540.451   2
 -10  -4  -4 10570.8 253.714   2
 -10  -4  -4 11311.4 397.647   3
 -10   4  -4 11918.5 573.457   2
 -10   4  -3 31954.6 983.088   2
 -10  -4  -3 31296.6 700.549   3
 -10   4  -2 8302.26 453.284   2
 -10   4  -1 2249.88 234.092   2
  10  -4   0 2796.17 202.330   1
 -10  -4   1 3132.70 169.807   3
  10  -4   1 2941.58 197.201   1
  10   4   1 2957.03 342.361   1
  10   4   2 6788.31 483.049   1
 -10  -4   2 7006.82 293.313   3
 -10  -4   3 29566.2 751.022   3
  10   4   3 28445.8 1026.32   1
 -10  -4   4 14640.4 527.544   3
  10   4   4 13439.7 672.335   1
  10   4   5 8364.99 537.768   1
 -10  -4   5 8079.35 412.671   3
 -10  -4   6 1958.18 234.749   3
 -10   4   6 1578.48 264.440   3
 -10   4   7 28229.3 1063.94   3
 -10  -4   7 29362.9 970.542   3
 -10   4   8 6203.94 524.834   3
 -10  -4   8 6556.67 483.616   3
 -10   4   9 10895.8 714.035   3
 -10  -4   9 11191.5 653.316   3
 -10  -4  10 2340.50 367.348   3
 -10   4  10 3020.69 434.348   3
 -10  -4  11 2040.79 366.290   3
 -10   4  11 1607.16 383.544   3
 -10  -4  12 772.576 294.499   3
 -10   4  12 1511.38 423.447   3
 -10   6  -7 935.551 255.626   2
 -10   6  -6 19035.6 877.806   2
 -10   6  -5 8853.63 579.918   2
 -10  -6  -4 13743.2 402.125   3
 -10   6  -4 14034.7 710.161   2
 -10  -6  -4 14195.9 357.572   2
 -10  -6  -3 7289.40 227.246   3
 -10   6  -3 7229.44 367.309   1
 -10   6  -3 7606.37 504.684   2
 -10   6  -2 22819.2 882.456   2
 -10   6  -1 364.863 141.963   2
  10  -6  -1 624.754 93.1540   1
  10  -6   0 12324.6 351.518   1
 -10   6   0 12606.6 615.198   2
  10   6   0 13040.9 410.418   2
  10   6   1 151.865 157.290   1
 -10  -6   1 178.872 41.7639   3
  10   6   2 15121.7 802.292   1
 -10  -6   2 19829.7 492.300   3
  10   6   3 7531.60 544.146   1
 -10  -6   3 8643.00 346.984   3
  10   6   4 10769.3 646.963   1
 -10  -6   4 11321.3 449.950   3
  10   6   5 10244.9 630.699   1
 -10  -6   5 11024.1 488.746   3
 -10  -6   6 20323.8 739.482   3
 -10  -6   7 1072.15 215.097   3
 -10   6   7 670.325 232.822   3
 -10   6   8 10996.1 708.317   3
 -10  -6   8 10214.3 588.210   3
 -10  -6   9 492.919 223.205   3
 -10   6   9 399.516 218.751   3
 -10   6  10 6797.50 607.689   3
 -10  -6  10 7361.02 559.215   3
 -10  -6  11 660.564 305.499   3
 -10   6  11 196.405 329.141   3
 -10  -6  12 4987.38 555.731   3
 -10   8  -9 3449.49 470.902   2
 -10   8  -8 1658.34 343.746   2
 -10   8  -7 8053.37 635.961   2
 -10   8  -6 2204.21 355.427   2
 -10   8  -5 4431.32 456.734   2
 -10   8  -4 1599.86 294.960   2
 -10   8  -3 10850.4 674.155   2
 -10   8  -2 16030.4 793.659   2
 -10   8  -1 9537.27 600.045   2
  10   8  -1 8819.09 431.410   2
 -10   8   0 13109.7 695.878   2
  10   8   0 13404.2 522.072   2
  10   8   1 11713.6 422.074   2
  10   8   1 11959.0 744.071   1
  10   8   2 14897.1 807.829   1
  10   8   3 7938.44 582.423   1
  10   8   4 2197.07 338.758   1
  10   8   5 6064.28 514.739   1
 -10  -8   5 6287.45 357.463   3
 -10  -8   6 4773.06 354.728   3
 -10   8   7 9875.15 684.023   3
 -10  -8   7 10180.4 553.656   3
 -10   8   8 2031.23 371.787   3
 -10  -8   8 1599.12 273.730   3
 -10   8   9 2159.73 399.886   3
 -10  -8   9 1981.92 316.191   3
 -10   8  10 792.844 296.921   3
 -10  -8  10 124.589 223.016   3
 -10   8  11 6340.98 663.937   3
 -10  10 -11 4916.79 617.372   2
 -10  10 -10 752.163 352.574   2
 -10  10  -9 2699.96 452.284   2
 -10  10  -8 707.076 293.696   2
 -10  10  -7 3413.29 473.249   2
 -10  10  -6 412.191 244.890   2
 -10  10  -5 14735.3 877.991   2
 -10  10  -4 258.723 191.137   2
 -10  10  -3 3647.75 426.154   2
 -10  10  -2 7176.13 578.361   2
  10  10  -2 7769.93 477.444   2
  10  10  -1 10876.5 551.832   2
 -10  10  -1 11773.9 736.867   2
 -10  10   0 165.551 210.613   2
  10  10   0 162.715 141.156   2
  10  10   0 173.998 174.472   1
  10  10   1 16728.5 617.394   2
  10  10   1 15610.0 874.207   1
  10  10   2 8521.27 641.274   1
  10  10   3 6292.91 544.989   1
  10  10   4 657.524 272.314   1
  10  10   5 15041.5 857.765   1
 -10  10   8 524.318 236.421   3
 -10  10   9 1983.19 407.952   3
 -10  10  10-347.097 348.157   3
 -10  12  -9 3385.92 558.736   2
 -10  12  -8 3756.34 544.981   2
 -10  12  -7-56.1290 225.303   2
 -10  12  -6 4084.52 551.057   2
 -10  12  -5 5464.41 608.137   2
  10  12  -4 4887.64 456.811   2
 -10  12  -4 5309.58 566.650   2
 -10  12  -3-246.147 236.174   2
  10  12  -3 112.637 156.758   2
 -10  12  -2 12650.3 844.597   2
  10  12  -2 11356.8 645.024   2
 -10  12  -1 141.157 265.353   2
  10  12  -1-33.3073 155.528   2
 -10  12   0 5778.57 560.958   2
  10  12   0 6764.06 468.496   2
  10  12   0 5833.08 584.762   1
  10  12   1 417.620 195.497   1
  10  12   2 8938.79 684.643   1
  10  12   3 347.899 226.765   1
  10  12   4 8225.20 664.986   1
  10  12   5 4932.89 528.124   1
 -10  12   8 5556.58 600.803   3
 -10  12   9 2797.23 465.011   3
 -10  14  -7 198.402 283.720   2
 -10  14  -6 3040.83 506.551   2
  10  14  -6 3131.37 441.392   2
 -10  14  -5 1197.81 381.982   2
  10  14  -5 1217.54 302.705   2
 -10  14  -4 1361.58 352.108   2
  10  14  -4 1818.84 346.545   2
 -10  14  -3 3817.17 516.729   2
  10  14  -3 3397.26 406.810   2
 -10  14  -2 6591.24 658.159   2
  10  14  -2 5531.47 497.637   2
 -10  14  -1 1781.60 360.892   2
  10  14  -1 2091.65 389.744   1
 -10  14   0 6296.35 646.518   2
  10  14   0 6335.64 594.393   1
  10  14   1 1753.54 367.907   1
  10  14   2 3636.61 465.017   1
  10  14   3 4288.73 497.167   1
  10  14   4 3124.23 458.166   1
  10  14   5 873.612 327.178   1
 -10  14   8 7050.43 716.986   3
  10  16  -7 2608.47 493.927   2
  10  16  -6 98.8793 249.790   2
 -10  16  -4 55.7209 314.880   2
 -10  16  -3 3378.25 572.543   2
 -10  16  -2 1579.03 408.639   2
  10  16  -2 2003.57 389.660   1
 -10  16  -1 4157.07 564.654   2
  10  16  -1 4009.75 511.346   1
  10  16   0 1264.86 312.017   1
  10  16   1 3938.64 506.395   1
  10  16   2 1518.52 330.377   1
  10  16   3 3759.05 471.504   1
  10  16   4 557.259 307.326   1
 -11   1  -5 27581.7 815.673   2
 -11  -1  -4 8708.33 314.066   2
 -11   1  -4 8732.78 395.668   2
 -11  -1  -3 2980.24 143.301   2
 -11   1  -3 2908.65 209.922   2
 -11   1  -2 5378.84 263.961   2
  11  -1  -1 26479.8 775.727   2
  11   1   0 8920.43 334.330   2
  11  -1   0 8860.63 413.209   2
  11   1   1 27451.1 978.841   1
  11  -1   1 29086.4 907.648   1
  11  -1   1 27329.3 766.649   2
  11   1   2 4939.46 380.299   1
  11  -1   2 5286.17 348.518   1
  11   1   3 5893.77 408.426   1
  11  -1   3 5645.82 363.735   1
 -11  -1   4 9863.78 472.485   3
  11   1   4 11695.3 578.686   1
 -11  -1   5 26394.7 848.510   3
 -11   1   5 26018.2 886.775   3
 -11  -1   6 823.730 185.819   3
 -11   1   6 939.956 212.483   3
 -11  -1   7 4884.85 387.583   3
 -11   1   7 4887.27 417.438   3
 -11  -1   8 1750.96 279.538   3
 -11   1   8 1726.45 305.634   3
 -11   1   9 5348.24 484.583   3
 -11  -1   9 5359.07 461.717   3
 -11  -1  10 567.449 249.324   3
 -11   1  10 764.428 258.771   3
 -11  -1  11 6495.34 578.809   3
 -11   1  11 6522.08 593.428   3
 -11  -1  12-33.1259 247.784   3
 -11   1  12 676.769 333.888   3
 -11   3  -6 9496.47 528.269   2
 -11   3  -5 1672.72 221.661   2
 -11   3  -4 17042.0 671.620   2
 -11   3  -3 4232.25 320.237   2
 -11   3  -2 28749.9 846.326   2
 -11   3  -1 2469.41 225.050   2
  11   3   0 23447.3 492.086   2
  11  -3   0 23022.8 748.405   1
  11   3   1 2757.35 329.880   1
  11  -3   1 3165.93 242.341   1
  11   3   2 24443.5 954.235   1
 -11  -3   2 24183.6 659.292   3
  11  -3   2 24805.1 736.065   1
 -11  -3   3 3855.45 251.813   3
  11   3   3 3148.61 338.039   1
 -11  -3   4 18782.0 632.568   3
  11   3   4 18996.3 813.123   1
 -11  -3   5 1382.91 196.573   3
  11   3   5 1445.40 265.843   1
 -11  -3   6 6261.57 413.896   3
 -11   3   6 6125.03 464.574   3
 -11   3   7 6163.78 481.562   3
 -11  -3   7 6244.32 435.819   3
 -11   3   8 10182.0 649.036   3
 -11  -3   8 10928.4 613.343   3
 -11  -3   9 1631.19 317.976   3
 -11   3   9 1160.70 301.685   3
 -11   3  10 8304.06 644.980   3
 -11  -3  10 8332.28 609.016   3
 -11  -3  11 4348.39 491.359   3
 -11   3  11 4161.22 519.146   3
 -11  -3  12 3040.45 451.141   3
 -11   3  12 3345.54 497.995   3
 -11   5  -7 11026.6 661.831   2
 -11   5  -6 11499.3 655.360   2
 -11   5  -5 4809.80 412.476   2
 -11   5  -4 16469.6 735.526   2
 -11  -5  -4 15689.4 467.957   3
 -11   5  -3 8127.30 494.867   2
 -11  -5  -3 8572.18 295.134   3
 -11   5  -2 28520.2 944.876   2
 -11  -5  -2 26902.0 567.023   3
 -11   5  -1 7459.79 448.782   2
  11  -5   0 2073.76 166.561   1
 -11  -5   0 2360.39 126.152   3
  11   5   0 2351.67 135.318   2
 -11  -5   1 5254.54 215.919   3
  11  -5   1 4747.46 249.366   1
  11   5   1 4376.02 443.304   1
  11   5   2 22756.1 994.360   1
 -11  -5   2 26368.8 641.315   3
 -11  -5   3 7133.69 329.459   3
  11   5   3 6851.75 509.356   1
  11   5   4 10333.0 642.000   1
 -11  -5   4 12466.4 484.259   3
  11   5   5 4064.26 413.036   1
 -11  -5   5 4174.35 311.649   3
 -11  -5   6 9727.28 511.262   3
 -11   5   7 8129.74 569.456   3
 -11  -5   7 7751.36 485.171   3
 -11   5   8 12172.3 738.697   3
 -11  -5   8 12382.7 654.868   3
 -11   5   9 6084.35 569.124   3
 -11  -5   9 5807.05 485.798   3
 -11  -5  10 3123.98 391.860   3
 -11   5  10 2498.89 408.414   3
 -11  -5  11 2699.57 394.952   3
 -11   5  11 3261.53 470.616   3
 -11  -5  12 3759.74 494.691   3
 -11   7  -9 7868.22 658.740   2
 -11   7  -8 163.129 210.939   2
 -11   7  -7 20567.3 993.358   2
 -11   7  -6 5120.51 480.601   2
 -11   7  -5 8784.58 604.341   2
 -11   7  -4 10422.9 642.059   2
 -11   7  -3 30744.1 1123.67   2
 -11   7  -2 1610.15 266.855   2
  11   7  -1 9646.15 412.617   2
  11  -7  -1 10225.4 311.895   1
 -11   7  -1 10129.9 589.155   2
  11   7   0 126.024 84.2045   2
 -11   7   0 39.6321 150.469   2
  11   7   1 9283.90 649.085   1
  11   7   2 2012.87 323.110   1
 -11  -7   2 2700.46 155.017   3
  11   7   3 25224.5 1095.33   1
 -11  -7   3 28355.4 697.837   3
  11   7   4 7915.92 591.003   1
 -11  -7   4 8074.41 373.194   3
  11   7   5 10280.6 682.359   1
 -11  -7   5 12106.0 505.552   3
 -11  -7   6 5257.77 366.564   3
 -11   7   7 20492.1 985.447   3
 -11  -7   7 21837.3 826.550   3
 -11  -7   8 95.4643 181.034   3
 -11   7   8 171.261 236.221   3
 -11   7   9 6738.76 630.870   3
 -11  -7   9 6636.73 516.057   3
 -11   7  10 752.402 322.264   3
 -11  -7  10 619.121 285.720   3
 -11   7  11 4814.36 590.996   3
 -11  -7  11 4682.32 504.173   3
 -11  -7  12 1201.10 343.636   3
 -11   9 -11 2234.46 474.572   2
 -11   9 -10 3575.50 527.164   2
 -11   9  -9 529.379 287.305   2
 -11   9  -8 3448.27 482.898   2
 -11   9  -7 830.114 262.356   2
 -11   9  -6 14382.9 859.510   2
 -11   9  -5 4472.03 476.660   2
 -11   9  -4 19477.2 980.362   2
 -11   9  -3 1182.24 275.275   2
  11   9  -2 18894.0 708.037   2
 -11   9  -2 18808.3 924.396   2
 -11   9  -1 10354.2 654.775   2
  11   9  -1 9910.52 475.719   2
 -11   9   0 21664.7 975.706   2
  11   9   0 25343.1 769.542   2
  11   9   0 23708.5 1136.79   1
  11   9   1 10131.0 716.891   1
  11   9   2 19897.5 1001.30   1
  11   9   3 1965.43 336.196   1
  11   9   4 14423.8 839.462   1
  11   9   5 3703.98 436.301   1
 -11   9   8 1564.99 352.931   3
 -11   9   9 345.233 310.890   3
 -11   9  10 3080.30 494.010   3
 -11  11 -10 8225.09 790.696   2
 -11  11  -9 886.683 348.485   2
 -11  11  -8 1058.53 348.663   2
 -11  11  -7 5767.87 620.161   2
 -11  11  -6 3656.85 488.084   2
 -11  11  -5 449.471 281.856   2
 -11  11  -4 12015.6 819.300   2
  11  11  -3 7022.60 492.063   2
 -11  11  -3 6452.64 589.788   2
 -11  11  -2 9654.52 717.451   2
  11  11  -2 7739.34 505.242   2
  11  11  -1 7019.24 464.673   2
 -11  11  -1 7064.85 595.163   2
 -11  11   0 20854.2 1035.32   2
  11  11   0 23009.8 820.121   2
  11  11   0 24217.0 1171.13   1
  11  11   1 8160.55 656.195   1
  11  11   2 9011.40 687.149   1
  11  11   3 7352.15 630.971   1
  11  11   4 11175.5 768.879   1
  11  11   5 1254.17 321.725   1
 -11  11   8 960.259 286.215   3
 -11  11   9 704.893 376.033   3
 -11  13  -8 204.594 347.157   2
 -11  13  -7 4923.40 623.025   2
 -11  13  -6 1296.55 377.357   2
  11  13  -5 5565.00 520.116   2
 -11  13  -5 6486.90 666.516   2
 -11  13  -4 842.647 327.843   2
  11  13  -4 604.015 220.276   2
 -11  13  -3 7365.33 681.679   2
  11  13  -3 6439.51 517.193   2
 -11  13  -2 1459.47 370.982   2
 -11  13  -1 18973.3 1045.29   2
  11  13  -1 19177.8 1065.83   1
  11  13   0 1154.68 322.138   1
 -11  13   0 1330.53 370.136   2
  11  13   1 15734.1 943.896   1
  11  13   2 1065.12 277.992   1
  11  13   3 8748.86 701.643   1
  11  13   4 1433.32 341.524   1
  11  13   5 6740.33 640.747   1
 -11  13   8 237.256 334.914   3
  11  15  -8 3407.37 523.923   2
  11  15  -7 2706.90 460.011   2
 -11  15  -5 154.613 335.175   2
 -11  15  -4 6457.43 707.882   2
 -11  15  -3 4877.49 610.901   2
 -11  15  -2 1778.26 432.983   2
  11  15  -2 1417.35 341.963   1
  11  15  -1 1011.32 312.407   1
 -11  15  -1 1073.80 371.347   2
  11  15   0 5524.24 586.843   1
  11  15   1 877.997 309.942   1
  11  15   2 2110.00 388.633   1
  11  15   3 4933.35 567.701   1
  11  15   4 6760.83 634.403   1
  11  17  -3 239.791 279.662   1
  11  17  -2 1567.39 368.586   1
  11  17  -1 909.195 340.299   1
  11  17   0 1281.53 327.987   1
  11  17   1 250.378 265.429   1
  11  17   2 2686.38 447.843   1
  11  17   3 19.0779 234.484   1
  11  17   4 5809.00 620.204   1
 -12   0  -5 49.9683 89.9819   2
 -12   0  -4 31285.5 782.562   2
 -12   0  -3 107.379 68.5162   2
  12   0  -1 26.8467 69.4615   2
  12   0   0 55305.4 1222.36   2
  12   0   1 36.1371 126.636   1
  12   0   1 15.2592 61.4893   2
  12   0   2 13629.0 630.152   1
  12   0   3 51.8655 115.127   1
  12   0   4 33130.7 1050.73   1
 -12   0   5-248.610 146.056   3
 -12   0   6 15979.9 701.099   3
 -12   0   7-132.471 146.825   3
 -12   0   8 1585.88 287.075   3
 -12   0   9 19.9856 217.897   3
 -12   0  10 16234.1 876.914   3
 -12   0  11-40.7001 213.655   3
 -12   0  12 3184.65 464.961   3
 -12   2  -6 9276.84 506.623   2
 -12   2  -5 7576.33 430.121   2
 -12  -2  -5 7382.69 288.380   2
 -12  -2  -4 8831.15 226.741   2
 -12   2  -4 9606.10 459.509   2
 -12   2  -3 9192.55 422.899   2
 -12   2  -2 6208.38 330.358   2
  12   2   0 5347.25 230.865   2
  12  -2   0 5498.80 387.135   1
  12  -2   1 24287.6 804.662   1
  12   2   1 23973.8 975.708   1
  12  -2   1 22911.3 770.415   2
  12   2   2 8147.25 533.924   1
  12  -2   2 8172.00 429.254   1
  12   2   3 12474.7 640.355   1
 -12  -2   3 10880.9 467.471   3
  12  -2   3 11754.8 532.648   1
 -12  -2   4 7167.90 391.342   3
  12   2   4 7656.62 507.573   1
 -12  -2   5 9421.94 487.022   3
 -12  -2   6 9744.10 522.538   3
 -12   2   6 9383.98 562.386   3
 -12  -2   7 4900.23 403.365   3
 -12   2   7 4958.42 435.351   3
 -12  -2   8 1873.66 291.347   3
 -12   2   8 1658.75 302.163   3
 -12   2   9 10650.0 688.934   3
 -12  -2   9 9982.93 638.734   3
 -12  -2  10 2518.19 370.594   3
 -12   2  10 2236.45 396.668   3
 -12  -2  11 1142.18 313.466   3
 -12   2  11 959.008 331.833   3
 -12  -2  12 2704.95 458.548   3
 -12   2  12 2492.93 441.275   3
 -12   4  -7 16965.6 797.719   2
 -12   4  -6 1911.87 279.644   2
 -12   4  -5 4549.31 381.832   2
 -12   4  -4 8053.25 482.337   2
 -12   4  -3 15958.2 659.512   2
 -12  -4  -3 13969.8 449.267   3
 -12   4  -2 5388.40 364.090   2
 -12   4  -1 13838.2 587.829   2
  12   4   0 8174.62 222.048   2
  12  -4   0 7984.76 398.132   1
  12  -4   1 12861.3 495.716   1
  12   4   1 13914.4 760.613   1
  12   4   2 4894.74 452.235   1
 -12  -4   2 5828.98 286.696   3
  12  -4   2 6154.21 338.776   1
 -12  -4   3 15808.1 535.448   3
  12   4   3 14997.6 774.878   1
 -12  -4   4 9378.74 437.874   3
  12   4   4 9668.94 619.439   1
 -12  -4   5 7969.06 432.447   3
  12   4   5 8198.82 559.868   1
 -12  -4   6 1253.68 217.757   3
 -12   4   6 1316.58 271.795   3
 -12   4   7 15600.2 796.194   3
 -12  -4   7 16025.6 704.527   3
 -12  -4   8 1406.32 278.157   3
 -12   4   8 1297.40 297.615   3
 -12   4   9 8069.70 626.591   3
 -12  -4   9 7623.33 551.045   3
 -12  -4  10-240.880 199.786   3
 -12   4  10 513.537 279.449   3
 -12   4  11 6199.80 621.527   3
 -12  -4  11 6198.63 577.553   3
 -12  -4  12-224.263 275.301   3
 -12   6  -9 1724.65 330.950   2
 -12   6  -8 12520.0 769.661   2
 -12   6  -7 8001.30 591.468   2
 -12   6  -6 9204.79 615.079   2
 -12   6  -5 517.625 206.622   2
 -12   6  -4 18185.6 836.547   2
 -12   6  -3 4685.27 404.681   2
 -12   6  -2 42140.9 1261.35   2
 -12  -6  -2 37475.6 672.963   3
 -12   6  -1 2776.84 303.192   2
  12  -6  -1 2566.35 201.531   1
 -12  -6   0 8154.92 223.532   3
  12  -6   0 8808.54 340.915   1
  12   6   0 8664.55 287.725   2
  12   6   1 2377.88 359.122   1
 -12  -6   1 2250.31 135.351   3
  12   6   2 33252.0 1316.86   1
 -12  -6   2 40545.6 848.335   3
 -12  -6   3 4014.06 246.121   3
  12   6   3 2624.21 348.452   1
  12   6   4 13874.4 798.605   1
 -12  -6   4 16643.1 571.385   3
 -12  -6   5 203.209 131.122   3
  12   6   5 528.754 218.357   1
 -12  -6   6 8133.27 462.759   3
 -12   6   7 7166.72 587.180   3
 -12  -6   7 7336.99 475.497   3
 -12   6   8 10693.7 721.619   3
 -12  -6   8 9988.25 595.309   3
 -12  -6   9 2278.57 341.158   3
 -12   6   9 2339.96 384.977   3
 -12  -6  10 4102.63 449.760   3
 -12   6  10 4360.10 544.838   3
 -12  -6  11 223.229 276.447   3
 -12   6  11 397.104 281.011   3
 -12  -6  12 3760.73 502.657   3
 -12   8 -12 1180.71 371.897   2
 -12   8 -11 3349.54 499.763   2
 -12   8 -10 1044.95 338.873   2
 -12   8  -9 2037.88 391.061   2
 -12   8  -8 5764.53 571.875   2
 -12   8  -7 13394.1 822.929   2
 -12   8  -6 8878.34 654.421   2
 -12   8  -5 13872.4 801.303   2
 -12   8  -4 12924.4 772.959   2
 -12   8  -3 11262.0 693.576   2
 -12   8  -2 15332.6 800.192   2
  12  -8  -2 14274.5 411.638   1
 -12   8  -1 4429.51 422.417   2
  12   8  -1 4193.98 285.128   2
  12   8   0 8397.61 357.203   2
  12   8   0 8237.03 666.153   1
  12   8   1 6780.74 586.265   1
  12   8   2 11980.6 770.930   1
  12   8   3 6015.20 552.631   1
 -12  -8   3 6826.48 289.896   3
  12   8   4 8417.90 659.300   1
 -12  -8   4 10304.3 416.694   3
  12   8   5 12263.0 782.845   1
 -12  -8   5 12549.8 521.051   3
 -12  -8   6 8981.73 480.166   3
 -12   8   7 12939.6 829.942   3
 -12  -8   7 13252.2 635.056   3
 -12   8   8 5133.01 553.860   3
 -12  -8   8 5326.02 442.090   3
 -12   8   9 1093.44 319.899   3
 -12  -8   9 1394.99 292.632   3
 -12   8  10 1682.06 411.303   3
 -12  -8  10 1182.08 283.754   3
 -12  -8  11 5357.07 550.565   3
 -12  -8  12 1600.75 378.244   3
 -12  10 -10 1322.31 373.704   2
 -12  10  -9 7261.42 731.748   2
 -12  10  -8 3356.72 481.759   2
 -12  10  -7 4061.89 518.771   2
 -12  10  -6 75.7564 240.211   2
 -12  10  -5 11507.5 797.652   2
 -12  10  -4 3351.66 448.781   2
 -12  10  -3 8373.35 651.099   2
 -12  10  -2 2059.36 352.186   2
  12  10  -2 2178.24 263.825   2
 -12  10  -1 16790.6 893.659   2
  12  10  -1 16771.0 678.072   2
  12  10   0 9974.66 754.181   1
  12  10   1 18977.3 1035.13   1
  12  10   2 1949.82 359.048   1
  12  10   3 9067.97 695.353   1
  12  10   4 1731.57 325.906   1
  12  10   5 11997.8 812.896   1
 -12  10   8 4054.56 512.302   3
 -12  10   9 4612.30 590.225   3
 -12  12  -9 1092.97 409.345   2
 -12  12  -8 2618.83 495.565   2
 -12  12  -7 102.298 283.791   2
 -12  12  -6 1094.47 305.871   2
 -12  12  -5 5000.86 598.947   2
  12  12  -4 4112.77 416.982   2
 -12  12  -4 3692.13 479.210   2
 -12  12  -3 989.710 292.263   2
 -12  12  -2 11480.2 816.567   2
 -12  12  -1 8141.94 671.327   2
  12  12  -1 7993.42 694.616   1
  12  12   0 17022.6 1015.11   1
  12  12   1 8528.75 713.270   1
  12  12   2 13511.3 871.700   1
  12  12   3 1351.02 340.465   1
  12  12   4 6821.12 649.356   1
  12  12   5 4747.70 564.672   1
 -12  12   8 2386.98 445.971   3
 -12  14  -6 3628.96 591.633   2
 -12  14  -5 861.559 352.835   2
 -12  14  -4 7776.33 758.572   2
 -12  14  -3 3751.43 561.690   2
 -12  14  -2 7391.56 691.375   2
 -12  14  -1 2657.68 451.756   2
  12  14  -1 3134.75 490.459   1
  12  14   0 3420.38 471.937   1
  12  14   1 2839.80 447.612   1
  12  14   2 5684.38 601.659   1
  12  14   3 5051.47 577.163   1
  12  14   4 9289.65 763.400   1
  12  14   5 1804.63 401.752   1
 -12  16  -2 1256.12 391.853   2
  12  16  -2 962.247 321.182   1
  12  16  -1 3975.69 561.691   1
 -12  16  -1 4048.61 596.617   2
  12  16   0 897.350 325.434   1
  12  16   1 2609.66 445.402   1
  12  16   2 1553.36 401.506   1
  12  16   3 2063.38 393.991   1
  12  16   4 122.209 276.506   1
  12  18  -1 606.919 298.937   1
  12  18   0 2357.28 426.039   1
 -13   1  -7 6829.15 427.459   2
 -13   1  -6 3955.28 308.594   2
 -13  -1  -6 3413.75 249.896   2
 -13  -1  -5 18239.7 530.555   2
 -13   1  -5 17712.4 636.875   2
 -13  -1  -4 14279.9 387.220   2
 -13   1  -4 14702.7 525.171   2
 -13   1  -3 4512.59 265.071   2
  13   1  -1 17264.0 562.909   2
  13   1   0 11043.4 414.015   2
  13  -1   0 12119.5 630.623   1
  13  -1   0 10610.3 492.423   2
  13  -1   1 17997.5 620.996   2
  13   1   1 19073.7 844.571   1
  13  -1   1 19318.8 782.567   1
  13   1   2 4840.98 408.120   1
  13  -1   2 5553.24 397.671   1
  13   1   3 7227.26 485.258   1
  13  -1   3 7070.41 443.538   1
 -13  -1   4 13828.9 591.590   3
  13   1   4 14232.8 699.485   1
  13  -1   4 14789.1 652.752   1
 -13  -1   5 18170.3 716.128   3
 -13   1   5 18509.1 762.055   3
 -13  -1   6 2437.47 294.916   3
 -13   1   6 2508.01 312.385   3
 -13  -1   7 8756.40 544.860   3
 -13   1   7 9614.04 596.478   3
 -13  -1   8 1413.02 274.610   3
 -13   1   8 1095.86 248.533   3
 -13  -1   9 9913.36 642.060   3
 -13   1   9 8950.87 636.647   3
 -13  -1  10 1631.02 343.692   3
 -13   1  10 1619.10 346.034   3
 -13  -1  11 5687.17 567.334   3
 -13   1  11 5880.08 581.970   3
 -13  -1  12-137.640 254.149   3
 -13   3  -8 7761.21 533.136   2
 -13   3  -7 2747.70 323.146   2
 -13   3  -6 14833.7 687.456   2
 -13   3  -5 464.730 168.185   2
 -13   3  -4 17265.3 689.070   2
 -13   3  -3 2212.16 237.549   2
 -13   3  -2 19495.7 677.929   2
  13   3   0 34717.6 697.686   2
  13  -3   0 36856.3 1064.44   1
  13  -3   1 14370.7 592.524   1
  13   3   1 13583.9 764.448   1
  13   3   2 19816.5 908.606   1
  13  -3   2 20302.8 707.463   1
  13  -3   3 1875.05 227.269   1
  13   3   3 1750.32 284.766   1
 -13  -3   3 1907.10 203.038   3
 -13  -3   4 19864.8 688.364   3
  13   3   4 20777.9 910.353   1
 -13  -3   5 43.3523 140.482   3
  13   3   5 271.534 178.904   1
 -13  -3   6 11245.7 564.367   3
 -13   3   6 11651.1 658.176   3
 -13  -3   7 3032.68 328.553   3
 -13   3   7 3798.03 413.179   3
 -13   3   8 6935.20 553.256   3
 -13  -3   8 7174.35 508.946   3
 -13  -3   9 220.228 205.600   3
 -13   3   9-239.780 253.914   3
 -13  -3  10 2715.04 393.458   3
 -13   3  10 2946.39 429.955   3
 -13  -3  11 3629.58 453.249   3
 -13   3  11 3907.41 503.933   3
 -13  -3  12 4382.61 547.039   3
 -13   5 -10 1012.16 311.029   2
 -13   5  -9 5729.80 543.158   2
 -13   5  -8 11247.1 713.281   2
 -13   5  -7 4449.83 429.223   2
 -13   5  -6 737.117 226.910   2
 -13   5  -5 4280.92 395.086   2
 -13   5  -4 988.507 211.270   2
 -13   5  -3 18561.6 774.656   2
 -13   5  -2 15783.2 692.153   2
  13  -5  -1 11829.0 514.198   1
  13  -5   0 5125.75 302.570   1
 -13  -5   1 9904.12 343.017   3
  13  -5   1 9720.22 412.958   1
  13   5   1 8890.64 657.389   1
  13   5   2 10236.4 693.161   1
 -13  -5   2 11335.1 408.047   3
 -13  -5   3 16185.1 542.592   3
  13   5   3 13945.3 807.612   1
 -13  -5   4 733.716 163.038   3
  13   5   4 865.528 227.223   1
  13   5   5 3893.81 441.016   1
 -13  -5   5 3637.14 297.446   3
 -13  -5   6 1445.83 227.678   3
 -13   5   7 4842.24 477.254   3
 -13  -5   7 3979.82 357.663   3
 -13   5   8 9158.36 670.204   3
 -13  -5   8 9761.19 596.266   3
 -13   5   9 5985.17 575.751   3
 -13  -5   9 6075.78 506.510   3
 -13  -5  10 3199.55 408.004   3
 -13   5  10 2404.96 429.101   3
 -13  -5  11 1209.71 320.042   3
 -13   5  11 908.868 361.955   3
 -13  -5  12 2101.01 423.544   3
 -13   7 -11 5513.71 611.471   2
 -13   7 -10 555.126 272.837   2
 -13   7  -9 2000.69 382.939   2
 -13   7  -8 1631.42 334.579   2
 -13   7  -7 12182.9 769.961   2
 -13   7  -6 3735.93 429.931   2
 -13   7  -5 4643.46 457.875   2
 -13   7  -4 7460.13 554.999   2
 -13   7  -3 6182.41 488.948   2
 -13   7  -2 2349.70 310.813   2
 -13   7  -1 2665.97 318.966   2
  13  -7  -1 3174.38 200.073   1
  13   7  -1 3214.31 219.962   2
  13  -7   0 2816.64 176.522   1
  13   7   0 2821.63 430.901   1
  13   7   1 6437.17 593.656   1
  13   7   2 1709.75 315.287   1
 -13  -7   2 1825.26 141.106   3
 -13  -7   3 4667.54 262.874   3
  13   7   3 3972.25 461.994   1
  13   7   4 5381.82 535.708   1
 -13  -7   4 6411.92 344.553   3
 -13  -7   5 3458.20 288.878   3
  13   7   5 3505.82 441.166   1
 -13  -7   6 4478.57 353.797   3
 -13   7   7 11416.9 750.798   3
 -13  -7   7 11621.6 597.024   3
 -13  -7   8 1017.22 244.293   3
 -13   7   8 665.038 298.835   3
 -13  -7   9 2514.51 357.643   3
 -13   7   9 2416.57 442.909   3
 -13  -7  10 319.717 228.419   3
 -13   7  10 762.379 357.224   3
 -13  -7  11 6255.35 570.021   3
 -13  -7  12 1118.16 375.446   3
 -13   9 -11-257.732 273.462   2
 -13   9 -10 3223.86 516.363   2
 -13   9  -9 400.532 232.939   2
 -13   9  -8 6235.10 630.443   2
 -13   9  -7 303.153 242.140   2
 -13   9  -6 6701.79 612.122   2
 -13   9  -5 1365.16 315.584   2
 -13   9  -4 9426.78 676.830   2
 -13   9  -3 613.775 242.605   2
  13   9  -2 7203.88 412.688   2
 -13   9  -2 7464.54 576.001   2
 -13   9  -1 1000.54 240.911   2
  13   9   0 11536.8 837.615   1
  13   9   1 692.596 302.937   1
  13   9   2 6747.61 617.213   1
  13   9   3 1501.03 336.711   1
  13   9   4 4093.60 503.111   1
  13   9   5 1479.70 342.253   1
 -13   9   8 3376.15 462.832   3
 -13   9   9-184.477 329.826   3
 -13  11  -9 1458.53 371.394   2
 -13  11  -8-226.189 279.419   2
 -13  11  -7 2386.22 441.178   2
 -13  11  -6 3993.23 516.490   2
 -13  11  -5-215.420 251.591   2
 -13  11  -4 3977.13 504.918   2
 -13  11  -3 5854.37 585.407   2
 -13  11  -2 1770.13 354.125   2
 -13  11  -1 307.004 244.776   2
  13  11   0 21318.4 1158.11   1
  13  11   1 69.9831 234.232   1
  13  11   2 2583.69 421.931   1
  13  11   3 5863.78 598.709   1
  13  11   4 3371.32 468.793   1
  13  11   5 550.870 320.254   1
 -13  11   8 502.931 278.445   3
 -13  13  -7 1453.33 421.879   2
 -13  13  -6-152.775 277.650   2
 -13  13  -5 2270.45 413.317   2
 -13  13  -4 481.421 257.451   2
 -13  13  -3 7120.58 678.171   2
 -13  13  -2 625.220 286.771   2
 -13  13  -1 7399.80 670.049   2
  13  13  -1 6605.48 674.465   1
  13  13   0 557.230 269.902   1
  13  13   1 5595.90 595.965   1
  13  13   2-4.14299 215.243   1
  13  13   3 10195.0 802.798   1
  13  13   4 967.707 324.294   1
  13  13   5 2914.75 462.435   1
 -13  15  -4 5655.74 672.615   2
 -13  15  -3 2930.26 509.187   2
 -13  15  -2 1488.45 395.882   2
  13  15  -2 1289.06 370.566   1
  13  15  -1 2428.68 427.766   1
 -13  15  -1 2156.30 448.582   2
  13  15   0 6789.23 671.652   1
  13  15   1 1111.44 325.570   1
  13  15   2 928.266 342.121   1
  13  15   3 2671.04 475.962   1
  13  15   4 8408.86 757.849   1
  13  15   5 1016.74 366.384   1
  13  17  -2 1113.35 352.754   1
  13  17  -1 682.608 356.546   1
  13  17   0 1287.87 354.107   1
  13  17   1 670.428 338.870   1
  13  17   2 2320.37 470.600   1
 -14   0  -5 59.2356 83.5706   2
 -14   0  -4 11359.0 387.703   2
  14   0  -1-0.63346 83.1366   2
  14   0   0 43576.6 1385.61   1
  14   0   0 40589.7 1044.47   2
  14   0   1-111.327 166.070   1
  14   0   2 3793.57 371.917   1
  14   0   3-11.1746 150.529   1
  14   0   4 15160.2 727.637   1
 -14   0   5 229.479 163.015   3
 -14   0   6 5875.19 438.571   3
 -14   0   7-42.0798 179.205   3
 -14   0   8 2288.24 330.106   3
 -14   0   9-71.7013 194.926   3
 -14   0  10 7995.38 629.998   3
 -14   0  11-448.408 295.712   3
 -14   2  -7 930.967 183.535   2
 -14   2  -6 5247.61 381.210   2
 -14   2  -5 7170.52 418.776   2
 -14   2  -4 8571.07 432.479   2
 -14   2  -3 7095.94 367.234   2
  14   2  -1 6271.24 309.935   2
  14   2   0 4140.71 445.841   1
  14   2   0 4440.30 226.148   2
  14  -2   0 4513.01 397.784   1
  14  -2   1 7151.47 456.798   1
  14   2   1 7048.77 550.212   1
  14  -2   2 1088.79 193.331   1
  14   2   2 704.526 209.479   1
  14   2   3 11973.6 689.822   1
  14  -2   3 12226.1 582.394   1
 -14  -2   4 4445.35 333.347   3
  14   2   4 5134.69 449.137   1
 -14  -2   5 7379.60 446.558   3
  14   2   5 7328.79 544.297   1
 -14  -2   6 5768.37 421.332   3
 -14   2   6 6379.14 483.452   3
 -14  -2   7 1799.16 265.191   3
 -14   2   7 2520.59 337.483   3
 -14  -2   8 2116.20 316.926   3
 -14   2   8 2517.14 361.850   3
 -14   2   9 5150.84 503.465   3
 -14  -2   9 5471.71 493.045   3
 -14  -2  10 2076.40 359.186   3
 -14   2  10 2997.18 439.818   3
 -14  -2  11 1072.68 330.809   3
 -14   2  11 645.079 291.355   3
 -14   4  -9 5362.58 511.924   2
 -14   4  -8 1909.30 308.014   2
 -14   4  -7 13114.7 703.454   2
 -14   4  -6 1363.61 254.890   2
 -14   4  -5 4299.75 372.309   2
 -14   4  -4 4650.53 373.919   2
 -14   4  -3 12726.5 600.207   2
 -14   4  -2 4659.58 342.459   2
  14  -4  -1 2065.08 251.447   1
  14  -4   0 2191.37 237.958   1
  14   4   0 1697.77 339.952   1
  14   4   1-26.7919 170.858   1
  14  -4   1 410.381 125.229   1
 -14  -4   2 3859.08 251.176   3
  14   4   2 3887.23 451.254   1
  14  -4   2 3991.15 297.828   1
 -14  -4   3 12203.4 489.730   3
  14   4   3 12191.4 743.242   1
 -14  -4   4 5231.06 335.912   3
  14   4   4 6428.99 541.049   1
 -14  -4   5 6323.22 401.347   3
  14   4   5 7304.31 592.287   1
 -14  -4   6 676.229 179.484   3
 -14   4   7 11430.3 708.585   3
 -14  -4   7 10140.4 582.646   3
 -14  -4   8 2392.88 323.250   3
 -14   4   8 2645.04 397.126   3
 -14   4   9 6114.09 575.277   3
 -14  -4   9 5554.33 499.501   3
 -14  -4  10 58.9342 216.711   3
 -14   4  10 167.912 283.861   3
 -14  -4  11 5154.27 533.440   3
 -14   6 -10 1610.30 361.947   2
 -14   6  -9 556.719 265.217   2
 -14   6  -8 8193.25 637.065   2
 -14   6  -7 1592.43 309.145   2
 -14   6  -6 6320.02 517.539   2
 -14   6  -5 1864.77 295.300   2
 -14   6  -4 7021.45 514.792   2
 -14   6  -3 5309.34 442.833   2
 -14   6  -2 15230.9 710.069   2
  14  -6  -1 557.894 113.166   1
  14  -6   0 11225.2 439.584   1
  14   6   0 11748.5 812.195   1
  14   6   1 487.305 208.696   1
 -14  -6   1 1006.68 109.133   3
  14  -6   1 980.222 139.139   1
 -14  -6   2 14036.6 453.149   3
  14   6   2 12254.0 811.953   1
 -14  -6   3 6592.20 330.968   3
  14   6   3 5148.42 527.069   1
  14   6   4 4086.65 467.572   1
 -14  -6   4 4069.78 288.760   3
 -14  -6   5 2571.28 270.058   3
  14   6   5 2554.41 394.439   1
 -14  -6   6 7425.35 463.510   3
 -14  -6   7 1312.48 246.895   3
 -14   6   7 1110.87 307.344   3
 -14   6   8 7064.24 635.678   3
 -14  -6   8 7575.44 531.131   3
 -14  -6   9 225.344 219.223   3
 -14   6   9-72.0368 256.582   3
 -14  -6  10 1500.81 311.513   3
 -14   6  10 2144.31 475.193   3
 -14  -6  11 92.7526 252.999   3
 -14   8 -11 4096.69 585.465   2
 -14   8 -10 1118.03 346.916   2
 -14   8  -9 1482.61 369.165   2
 -14   8  -8 885.304 293.661   2
 -14   8  -7 656.398 257.785   2
 -14   8  -6 1163.88 321.014   2
 -14   8  -5 632.449 214.996   2
 -14   8  -4 1628.52 298.246   2
 -14   8  -3 5332.08 488.292   2
 -14   8  -2 10517.0 661.814   2
 -14   8  -1 5870.89 487.617   2
  14   8   0 11213.0 818.831   1
  14   8   1 8855.58 717.851   1
  14   8   2 10803.8 783.481   1
  14   8   3 4997.86 537.978   1
  14   8   4 1924.52 359.266   1
  14   8   5 1086.15 318.932   1
  14   8   6 2190.00 419.496   1
 -14   8   8 1105.16 379.142   3
 -14   8   9 979.516 332.839   3
 -14  10 -10-152.971 290.722   2
 -14  10  -9 1812.07 425.886   2
 -14  10  -8 2738.76 467.247   2
 -14  10  -7 2439.34 432.349   2
 -14  10  -6 310.694 259.772   2
 -14  10  -5 12396.2 832.885   2
 -14  10  -4 249.065 230.246   2
 -14  10  -3 3123.95 430.290   2
 -14  10  -2 2348.68 372.437   2
 -14  10  -1 6673.64 592.740   2
  14  10   0 263.891 295.943   1
  14  10   1 10448.3 796.908   1
  14  10   2 1701.52 349.687   1
  14  10   3 2593.50 443.836   1
  14  10   4 90.5651 238.665   1
  14  10   5 9874.85 776.616   1
  14  10   6 1199.87 346.403   1
 -14  10   8 1606.05 372.112   3
 -14  12  -8 5382.75 684.518   2
 -14  12  -7-93.3804 267.829   2
 -14  12  -6 4150.77 568.855   2
 -14  12  -5 4077.52 536.123   2
 -14  12  -4 4994.96 585.319   2
 -14  12  -3 394.484 224.588   2
 -14  12  -2 7112.60 663.657   2
 -14  12  -1 1792.45 404.452   2
  14  12  -1 1990.33 409.827   1
  14  12   0 1468.11 358.040   1
  14  12   1 904.867 294.962   1
  14  12   2 5079.86 600.375   1
  14  12   3 250.407 260.751   1
  14  12   4 5714.67 626.131   1
  14  12   5 3964.67 556.288   1
 -14  14  -5 2295.18 480.924   2
 -14  14  -4 2289.33 466.953   2
 -14  14  -3 691.747 290.569   2
 -14  14  -2 3162.97 511.630   2
  14  14  -2 2757.14 479.796   1
  14  14  -1 1791.52 405.347   1
  14  14   0 2711.29 451.457   1
  14  14   1 1338.45 382.991   1
  14  14   2 3355.46 502.766   1
  14  14   3-44.7217 217.987   1
  14  14   4 4780.12 596.399   1
  14  14   5 2066.00 466.567   1
  14  16  -2-177.206 321.186   1
  14  16  -1 4505.08 610.110   1
  14  16   0 264.832 345.769   1
  14  16   1 4245.47 581.260   1
  14  16   2-126.470 274.277   1
 -15   1  -4 2034.82 187.703   2
  15   1   0 771.838 235.276   1
  15  -1   0 196.031 163.270   1
  15  -1   1 11118.8 623.889   1
  15   1   1 9883.35 638.125   1
  15  -1   2 3071.71 317.995   1
  15   1   2 3178.10 360.945   1
  15  -1   3 750.168 196.869   1
  15   1   3 131.553 164.342   1
  15   1   4 2223.32 321.916   1
 -15  -1   4 1894.07 246.695   3
  15  -1   4 2920.26 332.603   1
 -15  -1   5 8239.28 499.619   3
 -15   1   5 9004.03 546.577   3
 -15  -1   6 2723.51 318.344   3
 -15   1   6 2863.82 347.780   3
 -15  -1   7 7353.74 522.006   3
 -15   1   7 6901.23 525.897   3
 -15  -1   8 1463.79 298.195   3
 -15   1   8 1735.59 316.396   3
 -15   1   9 5744.79 526.800   3
 -15  -1   9 5083.24 482.822   3
 -15  -1  10 1761.64 334.809   3
 -15   1  10 1076.29 310.187   3
 -15  -1  11 2738.90 422.663   3
 -15   1  11 4717.31 539.817   3
 -15   3  -6 9520.76 556.048   2
 -15   3  -5 46.7102 120.875   2
 -15   3  -4 21282.2 770.474   2
 -15   3  -3 2718.49 252.750   2
  15  -3   0 483.773 172.885   1
  15   3   0 376.023 234.710   1
  15  -3   1 8497.02 488.658   1
  15   3   1 8332.32 630.763   1
  15   3   2 6176.54 548.418   1
  15  -3   2 5911.86 405.141   1
  15   3   3 2641.59 363.592   1
 -15  -3   3 2986.87 261.799   3
  15  -3   3 2700.98 281.384   1
 -15  -3   4 19547.7 721.432   3
  15   3   4 21647.1 989.305   1
  15   3   5 134.987 189.652   1
 -15  -3   5 5.69990 131.150   3
 -15  -3   6 5998.11 426.991   3
 -15   3   6 6221.30 507.674   3
 -15  -3   7 2014.61 291.710   3
 -15   3   7 2249.20 366.475   3
 -15  -3   8 2986.29 367.237   3
 -15   3   8 2357.27 361.814   3
 -15  -3   9 61.7734 196.030   3
 -15   3   9 657.411 318.430   3
 -15  -3  10 4355.12 471.386   3
 -15   3  10 4025.82 525.215   3
 -15  -3  11 44.5345 245.101   3
 -15   5  -8 4159.54 446.683   2
 -15   5  -7 4983.56 467.223   2
 -15   5  -6 1932.55 311.062   2
 -15   5  -5 226.372 163.821   2
 -15   5  -4 2263.50 285.302   2
 -15   5  -3 1214.33 220.156   2
  15  -5  -1 3833.58 330.305   1
  15  -5   0 4419.28 315.920   1
  15   5   0 4513.92 527.660   1
  15   5   1 4115.18 502.340   1
 -15  -5   1 3076.27 213.361   3
  15  -5   1 3269.80 273.671   1
  15   5   2 20421.4 1043.56   1
 -15  -5   2 20576.8 624.485   3
  15  -5   2 20153.6 698.769   1
  15   5   3 1107.81 277.772   1
 -15  -5   3 1724.72 199.406   3
 -15  -5   4 3011.37 265.786   3
  15   5   4 2947.84 412.298   1
  15   5   5 983.741 308.376   1
 -15  -5   5 1392.39 213.556   3
 -15  -5   6 1675.06 247.223   3
 -15   5   7 5612.83 526.124   3
 -15  -5   7 6671.96 465.172   3
 -15  -5   8 2350.23 332.531   3
 -15   5   8 2990.90 440.780   3
 -15  -5   9 3337.63 408.559   3
 -15   5   9 1871.52 372.653   3
 -15  -5  10 511.018 256.675   3
 -15   5  10 459.248 313.684   3
 -15  -5  11 572.165 305.940   3
 -15   7  -9 2942.73 439.260   2
 -15   7  -8 533.414 243.232   2
 -15   7  -7 6679.95 589.565   2
 -15   7  -6 555.437 234.836   2
 -15   7  -5 2630.51 372.797   2
 -15   7  -4 429.793 179.525   2
 -15   7  -3 10999.7 662.350   2
 -15   7  -2 2413.42 320.389   2
  15   7   0 3610.28 507.962   1
  15   7   1 8222.47 707.835   1
  15   7   2 2691.58 435.965   1
  15   7   3 8177.55 693.709   1
  15   7   4 365.351 212.112   1
  15   7   5 5713.05 592.479   1
  15   7   6 1445.32 373.571   1
 -15   7   7 6507.40 620.198   3
 -15   7   8 386.120 240.530   3
 -15   7   9 3957.41 557.572   3
 -15   9 -10 2310.15 468.606   2
 -15   9  -9 1355.92 398.704   2
 -15   9  -8 1623.89 365.630   2
 -15   9  -7 1420.28 337.305   2
 -15   9  -6 5927.37 606.265   2
 -15   9  -5 3027.57 424.312   2
 -15   9  -4 12426.8 799.805   2
 -15   9  -3 333.074 231.490   2
 -15   9  -2 8715.29 631.466   2
  15   9   0 6789.45 676.102   1
  15   9   1 1136.23 328.434   1
  15   9   2 12677.6 898.846   1
  15   9   3 43.9237 193.039   1
  15   9   4 7107.27 682.584   1
  15   9   5 1769.70 426.417   1
  15   9   6 7386.64 699.889   1
 -15   9   8 1494.86 408.460   3
 -15  11  -9 404.739 332.109   2
 -15  11  -8 848.322 318.144   2
 -15  11  -7 4129.06 571.883   2
 -15  11  -6 4986.34 598.333   2
 -15  11  -5 893.313 286.889   2
 -15  11  -4 5066.23 572.378   2
 -15  11  -3 3718.45 494.520   2
 -15  11  -2 1330.72 300.349   2
  15  11  -1 2655.94 497.926   1
  15  11   0 6641.19 687.684   1
  15  11   1 2955.62 484.369   1
  15  11   2 1161.86 371.739   1
  15  11   3 2779.01 456.828   1
  15  11   4 4824.62 589.825   1
  15  11   5 2257.35 425.585   1
  15  11   6 4257.56 559.972   1
 -15  13  -6-159.337 283.679   2
 -15  13  -5 5834.75 646.262   2
 -15  13  -4 670.118 378.598   2
 -15  13  -3 4675.76 561.725   2
 -15  13  -2 1665.72 405.525   2
  15  13  -2 701.308 307.163   1
  15  13  -1 5832.75 668.606   1
  15  13   0 304.809 252.788   1
  15  13   1 3019.98 530.967   1
  15  13   2 1403.51 380.027   1
  15  13   3 5938.99 670.315   1
  15  13   4 305.262 316.109   1
  15  13   5 6311.56 679.268   1
  15  15  -2 2194.25 448.743   1
  15  15  -1 1071.75 347.363   1
  15  15   0 4673.02 597.833   1
  15  15   1 1013.41 385.877   1
  15  15   2 1418.46 389.462   1
  16   0   0 64624.9 1889.60   1
  16   0   1 300.043 218.737   1
  16   0   2 7986.18 551.718   1
  16   0   3-200.879 181.624   1
  16   0   4 17004.2 817.123   1
 -16   0   5 61.9456 175.607   3
 -16   0   6 31688.5 1108.18   3
 -16   0   7 371.506 225.653   3
 -16   0   8 9636.49 647.262   3
 -16   0   9 36.8378 199.877   3
 -16   0  10 10832.6 747.318   3
  16   2   0 19764.3 1014.19   1
  16  -2   0 19011.6 853.185   1
  16   2   1 1115.98 290.783   1
  16  -2   1 883.645 204.176   1
  16   2   2 13002.3 783.957   1
  16  -2   2 13272.8 664.052   1
  16   2   3 16399.1 861.662   1
  16  -2   3 17128.5 760.928   1
  16   2   4 2443.24 372.702   1
 -16  -2   4 1580.76 226.382   3
 -16  -2   5 17362.2 741.486   3
  16   2   5 19689.2 954.359   1
 -16  -2   6 2141.39 277.480   3
 -16   2   6 2304.45 337.094   3
 -16  -2   7 7188.59 515.977   3
 -16   2   7 7802.09 569.217   3
 -16  -2   8 1001.18 252.517   3
 -16   2   8 648.960 231.053   3
 -16   2   9 12560.0 796.546   3
 -16  -2   9 13229.2 781.050   3
 -16  -2  10 2454.40 385.480   3
 -16   2  10 2044.79 414.517   3
 -16  -2  11 2503.17 426.362   3
 -16   4  -5 6806.41 472.864   2
 -16   4  -4 2097.76 265.499   2
 -16   4  -3 17985.3 725.963   2
  16  -4  -1 19397.9 812.867   1
  16  -4   0 4522.52 369.107   1
  16   4   0 4653.71 538.851   1
  16  -4   1 21801.9 796.923   1
  16   4   1 22941.7 1136.77   1
  16  -4   2 1971.93 245.154   1
 -16  -4   2 1611.47 193.386   3
  16   4   2 1910.41 354.531   1
 -16  -4   3 21482.2 722.996   3
  16   4   3 21725.5 1062.47   1
 -16  -4   4 2377.01 254.255   3
  16   4   4 2510.41 395.214   1
 -16  -4   5 8006.42 473.997   3
  16   4   5 8393.01 653.599   1
 -16  -4   6 1559.69 256.231   3
 -16   4   7 5288.96 501.628   3
 -16  -4   7 5141.88 439.171   3
 -16  -4   8 4389.68 419.067   3
 -16   4   8 3511.99 447.730   3
 -16  -4   9 1032.71 287.645   3
 -16   4   9 930.263 336.459   3
 -16  -4  10 2879.88 425.727   3
 -16   4  10 3104.91 497.900   3
 -16  -4  11 1569.02 353.796   3
 -16   6  -7 1570.47 313.350   2
 -16   6  -6 4146.74 440.175   2
 -16   6  -5 657.065 225.505   2
 -16   6  -4 5683.09 478.536   2
 -16   6  -3 2795.06 324.311   2
  16  -6  -2 27813.4 929.166   1
  16  -6  -1 601.458 149.354   1
  16  -6   0 13672.7 548.592   1
  16   6   0 14236.7 939.318   1
  16  -6   1 612.294 150.519   1
  16   6   1 271.600 258.448   1
  16   6   2 26320.0 1270.28   1
  16   6   3 2631.01 424.729   1
  16   6   4 8001.17 674.653   1
  16   6   5 781.106 300.177   1
  16   6   6 7713.98 697.117   1
 -16   6   7 1127.56 345.586   3
 -16   6   8 7529.65 662.212   3
 -16   6   9 374.889 330.151   3
 -16   8  -8 1538.64 332.616   2
 -16   8  -7 2887.86 428.413   2
 -16   8  -6 2917.30 414.490   2
 -16   8  -5 3607.08 444.030   2
 -16   8  -4 2651.03 378.583   2
 -16   8  -3 4803.27 476.378   2
 -16   8  -2 3747.85 418.878   2
  16   8   0 4051.45 554.595   1
  16   8   1 11580.2 857.841   1
  16   8   2 3909.63 525.609   1
  16   8   3 3778.25 493.501   1
  16   8   4 1112.74 307.924   1
  16   8   5 2608.60 443.217   1
  16   8   6 2297.47 419.918   1
 -16   8   8 2136.59 412.451   3
 -16  10  -9 3747.07 548.365   2
 -16  10  -8 1993.04 423.125   2
 -16  10  -7 4699.84 574.162   2
 -16  10  -6 586.394 286.857   2
 -16  10  -5 7364.71 679.137   2
 -16  10  -4 461.532 284.272   2
 -16  10  -3 2513.72 401.159   2
 -16  10  -2 1782.98 342.091   2
  16  10  -1 3433.94 549.916   1
  16  10   0 465.789 266.669   1
  16  10   1 4367.71 580.101   1
  16  10   2 1739.22 419.060   1
  16  10   3 1826.66 400.521   1
  16  10   4 454.062 298.242   1
  16  10   5 5971.16 674.011   1
  16  10   6 576.070 287.238   1
 -16  12  -7 314.449 325.336   2
 -16  12  -6 3930.93 550.027   2
 -16  12  -5 2603.23 464.516   2
 -16  12  -4 4669.11 556.892   2
 -16  12  -3 668.129 311.631   2
 -16  12  -2 3355.75 491.437   2
  16  12  -1 784.923 300.897   1
  16  12   0 2044.94 454.933   1
  16  12   1 604.355 337.625   1
  16  12   2 2874.01 519.720   1
  16  12   3 624.945 315.442   1
  16  12   4 6088.84 685.417   1
  16  12   5 4467.63 616.909   1
 -16  14  -3 2767.68 498.002   2
  16  14  -2 3084.06 530.032   1
  16  14  -1 3981.92 573.519   1
  16  14   0 1816.83 407.948   1
  16  14   1 2725.98 521.566   1
  16  14   2 2911.90 508.054   1
  17  -1  -1 17257.5 904.508   1
  17   1   0 508.476 221.266   1
  17  -1   0 539.538 226.919   1
  17   1   1 16904.1 898.268   1
  17  -1   1 15499.1 803.068   1
  17  -1   2 2711.68 343.321   1
  17   1   2 2625.05 369.869   1
  17   1   3 4530.89 463.008   1
  17  -1   3 5681.84 460.277   1
 -17  -1   4 9036.21 524.627   3
  17   1   4 8844.25 627.547   1
  17  -1   4 8879.55 588.033   1
 -17  -1   5 15267.5 722.453   3
 -17   1   5 14558.6 739.777   3
  17   1   5 16432.3 860.295   1
 -17  -1   6 2583.63 328.193   3
 -17   1   6 3351.38 377.888   3
 -17  -1   7 4576.14 439.848   3
 -17   1   7 5279.58 488.181   3
 -17  -1   8 2129.22 342.885   3
 -17   1   8 2523.87 380.904   3
 -17  -1   9 5459.73 539.496   3
 -17   1   9 4943.45 525.156   3
 -17  -1  10 1087.02 336.351   3
 -17   1  10 1301.11 352.277   3
  17  -3  -1 8112.87 567.485   1
  17  -3   0 22585.8 916.158   1
  17   3   0 22835.6 1164.82   1
  17  -3   1 7171.90 493.577   1
  17   3   1 8590.12 682.796   1
  17   3   2 12173.9 803.597   1
  17  -3   2 13146.9 659.755   1
  17   3   3 1698.58 349.763   1
 -17  -3   3 1413.30 215.527   3
  17  -3   3 1825.63 264.377   1
 -17  -3   4 11500.6 557.471   3
  17   3   4 12081.8 789.590   1
 -17  -3   5 556.877 186.823   3
  17   3   5 617.883 235.324   1
 -17  -3   6 7909.77 522.513   3
 -17   3   6 8758.59 618.730   3
 -17  -3   7 803.068 241.892   3
 -17   3   7 1228.90 303.342   3
 -17  -3   8 5458.80 484.335   3
 -17   3   8 4384.41 491.592   3
 -17  -3   9 2202.30 338.361   3
 -17   3   9 1798.80 372.625   3
 -17  -3  10 2610.10 401.233   3
 -17   5  -4 4608.11 392.200   2
  17  -5  -2 18868.8 824.108   1
  17  -5  -1 3357.84 317.863   1
  17  -5   0 1615.52 227.284   1
  17   5   0 1638.34 359.619   1
  17   5   1 3860.00 517.779   1
  17  -5   1 3012.38 285.196   1
  17   5   2 16801.7 1009.18   1
  17  -5   2 17410.2 691.182   1
  17   5   3 8703.75 721.136   1
  17   5   4 5297.53 563.104   1
  17   5   5 1995.14 396.663   1
 -17  -5   5 1298.26 219.423   3
 -17  -5   6 2314.69 296.821   3
 -17  -5   7 2618.84 332.206   3
 -17   5   7 3137.50 439.092   3
 -17  -5   8 3409.78 420.274   3
 -17   5   8 2492.61 425.464   3
 -17   5   9 5568.79 599.690   3
 -17  -5   9 6712.71 558.424   3
 -17   7  -6 1919.14 321.934   2
 -17   7  -5 2969.36 382.581   2
 -17   7  -4 230.161 187.260   2
 -17   7  -3 8709.24 595.498   2
  17   7   0 2668.19 454.252   1
  17   7   1 12076.0 878.312   1
  17   7   2 532.683 270.614   1
  17   7   3 8251.53 734.689   1
  17   7   4 493.674 280.537   1
  17   7   5 4846.33 575.637   1
  17   7   6 1844.20 399.044   1
 -17   7   7 7875.90 701.893   3
 -17   7   8 288.048 325.902   3
 -17   9  -7 343.845 213.844   2
 -17   9  -6 7384.60 648.230   2
 -17   9  -5 1628.79 340.343   2
 -17   9  -4 5844.83 550.372   2
 -17   9  -3 78.9300 183.854   2
  17   9  -1 472.062 364.307   1
  17   9   0 5524.89 638.601   1
  17   9   1 150.981 274.652   1
  17   9   2 10900.9 877.675   1
  17   9   3 133.162 279.411   1
  17   9   4 5726.85 660.934   1
  17   9   5 1685.96 424.946   1
  17   9   6 8185.44 756.471   1
 -17  11  -7 2238.72 433.154   2
 -17  11  -6 5579.99 613.592   2
 -17  11  -5 935.420 346.288   2
 -17  11  -4 3012.32 455.391   2
 -17  11  -3 5179.86 561.416   2
  17  11  -1 3399.66 550.272   1
  17  11   0 5757.21 675.725   1
  17  11   1 4152.46 609.071   1
  17  11   2 570.199 281.807   1
  17  11   3 5893.84 665.056   1
  17  11   4 3669.17 578.394   1
  17  11   5 1065.73 357.783   1
 -17  13  -5 5481.17 687.758   2
 -17  13  -4 457.476 312.606   2
 -17  13  -3 5963.74 657.681   2
  17  13  -2 479.036 329.020   1
  17  13  -1 4434.19 626.524   1
  17  13   0-32.4310 316.896   1
  17  13   1 2564.99 504.750   1
  17  13   2 377.211 290.860   1
  18   0  -1 137.105 219.633   1
  18   0   0 26657.0 1171.12   1
  18   0   1 26.0691 191.527   1
  18   0   2 5771.94 509.087   1
  18   0   3 223.742 177.914   1
  18   0   4 9011.78 643.594   1
 -18   0   5 442.320 219.410   3
 -18   0   6 2091.93 324.728   3
 -18   0   7-29.2788 212.802   3
 -18   0   8 900.012 268.796   3
 -18   0   9-104.276 258.146   3
 -18   0  10 5989.05 586.388   3
  18  -2  -1 3602.65 421.914   1
  18   2   0 5283.10 569.886   1
  18  -2   0 5085.58 477.322   1
  18   2   1 3634.30 462.436   1
  18  -2   1 3797.46 399.489   1
  18  -2   2 1904.43 309.474   1
  18   2   2 2113.28 361.504   1
  18   2   3 5779.99 555.061   1
  18  -2   3 4899.90 445.548   1
 -18  -2   4 7075.16 458.667   3
  18   2   4 7488.70 614.118   1
 -18  -2   5 8966.78 540.545   3
  18   2   5 8550.33 671.984   1
 -18  -2   6 4771.98 425.313   3
 -18   2   6 4791.53 478.626   3
 -18  -2   7 2198.75 342.026   3
 -18   2   7 2451.95 366.364   3
 -18  -2   8 1099.39 288.777   3
 -18   2   8 1108.68 340.227   3
 -18  -2   9 2549.01 384.219   3
 -18   2   9 2271.58 413.552   3
 -18  -2  10 359.444 259.419   3
  18  -4  -2 1931.97 303.079   1
  18  -4  -1 6839.44 502.870   1
  18   4   0-368.414 257.673   1
  18  -4   0-213.407 165.599   1
  18  -4   1 4991.79 406.022   1
  18   4   1 6159.65 633.388   1
  18  -4   2 1221.30 221.803   1
  18   4   2 930.890 286.330   1
  18   4   3 13123.0 876.870   1
  18   4   4 1108.66 297.799   1
 -18  -4   4 1223.03 215.624   3
  18   4   5 3966.12 494.736   1
 -18  -4   5 3670.78 346.377   3
 -18  -4   6 389.806 188.294   3
 -18   4   7 6516.56 580.997   3
 -18  -4   7 6754.77 509.305   3
 -18  -4   8 4806.32 452.482   3
 -18   4   8 5295.51 560.588   3
 -18  -4   9 3425.89 420.890   3
 -18  -4  10 399.031 287.460   3
  18   6  -1 3284.17 532.429   1
  18   6   0 7535.14 714.886   1
  18   6   1 2757.71 479.700   1
  18   6   2 14348.8 980.694   1
  18   6   3 2376.54 435.521   1
  18   6   4 3858.68 524.569   1
  18   6   5 261.117 254.770   1
  18   6   6 3778.97 540.545   1
 -18   6   7 1839.76 405.987   3
 -18   6   8 3162.42 473.593   3
 -18   8  -5 1236.27 296.634   2
 -18   8  -4 6545.02 562.464   2
  18   8  -1 6096.40 709.538   1
  18   8   0 3236.87 541.183   1
  18   8   1 7041.95 702.552   1
  18   8   2 7049.16 715.750   1
  18   8   3 1717.08 413.406   1
  18   8   4 4911.65 618.127   1
  18   8   5 2450.05 488.955   1
  18   8   6 4626.57 591.911   1
 -18  10  -6 37.4546 235.425   2
 -18  10  -5 8088.92 692.890   2
 -18  10  -4-30.4425 203.941   2
 -18  10  -3 4279.11 521.716   2
  18  10  -1 7269.08 774.305   1
  18  10   0 185.348 277.324   1
  18  10   1 8179.67 795.933   1
  18  10   2 546.451 306.275   1
  18  10   3 2926.82 532.908   1
  18  10   4 435.505 309.089   1
  18  10   5 8353.10 835.749   1
 -18  12  -6 3496.67 547.698   2
 -18  12  -5 3688.71 542.818   2
 -18  12  -4 4258.09 561.429   2
  18  12  -1 355.906 266.516   1
  18  12   0 1291.96 377.484   1
  18  12   1 312.758 291.567   1
  19   1  -1 8659.12 726.068   1
  19  -1  -1 8350.05 653.279   1
  19   1   0 3518.42 468.948   1
  19  -1   0 3009.95 400.699   1
  19   1   1 9446.85 707.684   1
  19  -1   1 9404.48 658.071   1
  19  -1   2 1789.15 317.648   1
  19   1   2 1309.61 284.603   1
  19  -1   3 2917.36 379.929   1
  19   1   3 3533.05 448.937   1
  19  -1   4 2248.84 348.650   1
 -19  -1   4 1993.56 281.345   3
  19   1   4 2943.17 427.730   1
 -19  -1   5 9830.69 590.302   3
 -19   1   5 11252.3 670.277   3
  19   1   5 12567.7 782.640   1
 -19  -1   6 757.138 231.610   3
 -19   1   6 1165.75 274.419   3
 -19  -1   7 3180.45 388.223   3
 -19   1   7 2644.72 388.462   3
 -19  -1   8 1691.55 339.960   3
 -19   1   8 1083.49 276.463   3
 -19  -1   9 2390.01 392.475   3
 -19   1   9 3122.76 440.944   3
  19  -3  -2 8982.86 658.088   1
  19  -3  -1 1083.69 249.091   1
  19   3  -1 1693.05 384.857   1
  19  -3   0 9655.52 629.174   1
  19   3   0 10830.2 830.267   1
  19  -3   1 1340.78 235.339   1
  19   3   1 1179.22 327.218   1
  19   3   2 8078.88 694.103   1
  19  -3   2 8725.41 568.076   1
  19  -3   3 594.937 218.816   1
  19   3   3 487.900 271.428   1
 -19  -3   3 416.013 176.353   3
 -19  -3   4 7369.16 476.468   3
  19   3   4 8615.99 700.817   1
 -19  -3   5-117.110 158.495   3
  19   3   5 304.938 307.930   1
 -19  -3   6 2834.74 350.935   3
 -19   3   6 2591.31 383.280   3
 -19  -3   7 1121.78 270.404   3
 -19   3   7 1162.52 326.360   3
 -19  -3   8 3484.58 415.373   3
 -19   3   8 3063.33 439.060   3
 -19  -3   9 599.229 271.845   3
 -19  -3  10 2456.81 434.823   3
  19   5  -1 5395.16 647.706   1
  19   5   0-86.0051 277.329   1
  19   5   1 3751.28 520.874   1
  19   5   2 4234.33 554.268   1
  19   5   3 6274.37 650.373   1
  19   5   4 1177.19 355.819   1
  19   5   5 4149.36 561.948   1
 -19   5   7 4626.94 541.501   3
  19   7  -1 3123.57 512.096   1
  19   7   0 29.3097 247.267   1
  19   7   1 4551.36 612.349   1
  19   7   2 1489.52 430.967   1
  19   7   3 2037.25 441.800   1
  19   7   4 1695.07 387.644   1
  19   7   5 178.226 268.632   1
  19   7   6 2237.43 478.498   1
  19   9  -1 817.021 383.160   1
  19   9   0 2260.72 447.715   1
  19   9   1 551.649 337.297   1
  19   9   2 4213.71 603.509   1
  19   9   3 787.102 416.639   1
  19   9   4 1445.56 386.272   1
 -19  11  -4 3072.88 450.503   2
  19  11   0 4540.81 647.544   1
  20   0  -1-191.100 272.897   1
  20   0   0 19213.3 1027.84   1
  20   0   1-213.549 241.557   1
  20   0   2 1987.12 355.157   1
  20   0   3 75.8283 194.529   1
  20   0   4 5557.65 532.774   1
 -20   0   5 390.817 261.320   3
 -20   0   6 6401.08 541.443   3
 -20   0   7-117.442 236.563   3
 -20   0   8 2049.82 382.656   3
 -20   0   9-394.331 294.263   3
  20  -2  -2 293.742 211.721   1
  20  -2  -1 5482.91 531.182   1
  20   2  -1 6245.04 651.149   1
  20   2   0 682.796 284.073   1
  20  -2   0 431.863 224.746   1
  20  -2   1 5068.99 487.792   1
  20   2   1 5092.95 558.035   1
  20  -2   2 1217.58 288.424   1
  20   2   2 1104.11 299.578   1
 -20  -2   3 7325.42 476.817   3
  20   2   3 8160.08 681.045   1
  20  -2   3 9012.66 623.842   1
  20   2   4 981.175 327.245   1
 -20  -2   4 468.407 181.324   3
 -20  -2   5 3871.08 385.151   3
  20   2   5 4971.77 537.772   1
 -20  -2   6 2400.75 363.811   3
 -20   2   6 1859.43 352.324   3
 -20  -2   7 1912.87 348.120   3
 -20   2   7 1985.54 376.721   3
 -20  -2   8-230.310 255.601   3
 -20   2   8 357.318 295.052   3
 -20  -2   9 4665.49 517.005   3
  20   4  -1 1645.55 399.277   1
  20   4   0 4016.81 530.510   1
  20   4   1 2534.45 458.737   1
  20   4   2 3265.21 529.303   1
  20   4   3 4958.46 581.823   1
  20   4   4 3184.02 495.514   1
  20   4   5 2535.58 452.316   1
 -20   4   6-245.284 306.679   3
 -20   4   7 4144.51 499.744   3
  20   6  -1 471.826 316.974   1
  20   6   0 2520.49 499.378   1
  20   6   1 586.344 323.101   1
  20   6   2 6035.21 676.531   1
  20   6   3-22.7216 247.004   1
  20   6   4 1830.30 405.549   1
  20   6   5 1335.85 399.585   1
  20   8  -2 1203.83 400.305   1
  20   8  -1 2410.63 519.576   1
  20   8   0 796.755 396.163   1
  20   8   1 3999.65 579.980   1
  20   8   2 1431.99 465.424   1
  20   8   3 3300.55 546.139   1
  20   8   4 947.242 373.655   1
  21   1  -2 920.594 373.894   1
  21  -1  -2 846.923 275.206   1
  21   1  -1 4588.36 579.438   1
  21  -1  -1 3434.89 477.084   1
  21   1   0 5570.77 606.640   1
  21  -1   0 3857.94 470.224   1
  21   1   1 3395.79 453.483   1
  21  -1   1 4449.99 491.898   1
  21   1   2 1514.05 336.934   1
  21  -1   2 1418.04 313.196   1
  21  -1   3 2675.42 391.990   1
  21   1   3 2686.72 426.129   1
  21   1   4 1908.50 398.292   1
 -21  -1   4 1500.12 274.760   3
  21  -1   4 2303.97 370.080   1
 -21  -1   5 5055.51 475.229   3
 -21   1   5 6164.36 532.044   3
 -21  -1   6 53.1623 216.446   3
 -21   1   6 523.579 258.426   3
 -21  -1   7 3558.81 437.058   3
 -21   1   7 2891.10 400.809   3
 -21  -1   8 417.222 288.094   3
 -21   1   8 977.048 314.837   3
  21   3  -1 448.068 285.066   1
  21  -3  -1 998.635 267.230   1
  21   3   0 666.471 287.648   1
  21  -3   0 1022.67 248.770   1
  21  -3   1 1140.50 267.622   1
  21   3   1 833.769 273.292   1
  21   3   2 3405.86 513.593   1
  21   3   3 139.472 223.791   1
  21   3   4 4462.47 551.820   1
  21   3   5-107.975 228.232   1
 -21   3   6 438.066 290.085   3
 -21   3   7 604.173 259.143   3
  21   5  -2 4520.12 613.762   1
  21   5  -1 4106.13 624.192   1
  21   5   0 83.3099 263.794   1
  21   5   1 3732.74 556.380   1
  21   5   2 5363.59 653.761   1
  21   5   3 1208.98 365.275   1
  21   5   4 254.002 345.687   1
  21   5   5 756.517 354.902   1
  21   7  -2-83.6366 282.127   1
  21   7  -1 3915.25 610.555   1
  21   7   0-91.1734 291.604   1
  21   7   1 3037.54 555.812   1
  21   7   2 393.218 305.298   1
  21   7   3 8756.91 835.954   1
  22   0  -2 1479.57 348.449   1
  22   0  -1-111.709 241.716   1
  22   0   0 7698.10 703.576   1
  22   0   1 160.292 222.575   1
  22   0   2 2724.75 419.810   1
  22   0   3 172.559 252.150   1
 -22   0   4 6622.20 540.605   3
  22   0   4 7741.82 674.595   1
 -22   0   5-134.798 219.162   3
 -22   0   6 3159.99 425.101   3
 -22   0   7 11.9624 243.970   3
  22  -2  -3 1218.47 302.538   1
  22  -2  -2 1409.28 327.185   1
  22   2  -2 1154.94 378.785   1
  22   2  -1 6098.19 677.101   1
  22  -2  -1 5999.31 586.662   1
  22   2   0 3436.51 502.683   1
  22  -2   0 2428.95 382.104   1
  22  -2   1 5185.60 511.416   1
  22   2   1 5208.59 614.450   1
  22  -2   2 1388.17 293.617   1
  22   2   2 1896.91 388.727   1
  22  -2   3 2145.62 358.895   1
  22   2   3 2882.58 481.833   1
  22   2   4 897.316 333.811   1
 -22   2   5 4945.86 523.906   3
  22   2   5 6514.79 674.084   1
 -22   2   6 1400.89 329.587   3
 -22   2   7 2247.34 426.840   3
  22   4  -2 957.796 403.119   1
  22   4  -1 3737.79 576.959   1
  22   4   0 906.634 374.440   1
  22   4   1 3221.17 509.515   1
  22   4   2 1615.17 409.165   1
  22   4   3 7254.50 735.720   1
  22   4   4 1421.28 397.218   1
  22   4   5 3203.74 550.148   1
  22   6  -2 8917.61 879.055   1
  22   6  -1 223.172 338.033   1
  22   6   0 3530.93 596.507   1
  22   6   1-359.265 356.842   1
  22   6   2 5832.48 692.049   1
  22   6   3 1629.54 419.783   1
  23  -1  -3 3049.68 506.392   1
  23  -1  -2 2194.98 412.718   1
  23   1  -2 2546.83 499.787   1
  23   1  -1 7454.14 718.649   1
  23  -1  -1 6362.64 631.956   1
  23   1   0 1231.22 359.780   1
  23  -1   0 1851.16 353.002   1
  23   1   1 7307.64 681.643   1
  23  -1   1 7056.71 621.743   1
  23   1   2 1811.74 395.650   1
  23  -1   2 1385.81 338.868   1
  23   1   3 2281.69 413.734   1
  23  -1   3 2967.74 439.579   1
  23   1   4 2226.88 434.624   1
 -23   1   5 4799.89 487.750   3
 -23   1   6 510.450 248.921   3
  23   3  -2 7188.47 779.101   1
  23   3  -1-573.815 379.119   1
  23   3   0 10185.4 873.507   1
  23   3   1 819.257 367.224   1
  23   3   2 6610.05 698.912   1
  23   3   3 770.930 328.887   1
  23   3   4 5205.37 650.322   1
  23   5  -2 3931.80 640.926   1
  23   5  -1 2535.27 528.153   1
  23   5   0 453.121 371.063   1
  23   5   1 2538.14 475.121   1
  23   5   2 3202.13 535.681   1
  24   0  -3 134.635 316.901   1
  24   0  -2 4622.04 595.791   1
  24   0  -1 376.631 306.891   1
  24   0   0 14069.5 961.161   1
  24   0   1-193.933 276.660   1
  24   0   2 4603.87 580.730   1
  24   0   3 830.753 318.900   1
  24   0   4 3451.83 511.670   1
  24   2  -3 1556.00 474.941   1
  24   2  -2 1533.44 450.776   1
  24   2  -1 3156.33 538.493   1
  24   2   0 1989.87 445.299   1
  24   2   1 2844.44 515.966   1
  24   2   2 843.904 372.705   1
  24   2   3 3400.45 529.898   1
  24   2   4 1885.42 433.878   1
 -24   2   5 2535.62 427.529   3
  25   1  -3 1334.06 403.334   1
  25   1  -2 197.482 317.047   1
  25   1  -1 2786.35 512.112   1
  25   1   0 2460.95 489.976   1
  25   1   1 2797.55 468.461   1
  25   1   2-220.140 309.342   1
  25   1   3 1201.50 354.978   1
   0   0   0    0.00    0.00   0
TITL ko846_150 in Cmc2(1)
REM Cmc2(1) (#36, found as Ccm2(1) in ba-c setting)
CELL 0.71073  18.792510  14.906376  11.179038  90.0000  90.0000  90.0000
ZERR    4.00   0.001197   0.000804   0.000736   0.0000   0.0000   0.0000
LATT -7
SYMM -x,-y, z+1/2
SYMM  x,-y, z+1/2
SYMM -x, y, z
SFAC C H N O Cl Y
UNIT 80.00 96.00 60.00 16.00 8.00 4.00
TREF
HKLF 4
END
;
_shelx_hkl_checksum   34450
